# Supplementary material for: Ectopic Expression of AeNAC83, a NAC Transcription Factor from Abelmoschus esculentus, Inhibits Growth and Confers Tolerance to Salt Stress in Arabidopsis
Source: MDPI journal article supplement (doi:10.3390/ijms231710182), 2022-09-05
Supplement: s1 [file s1]

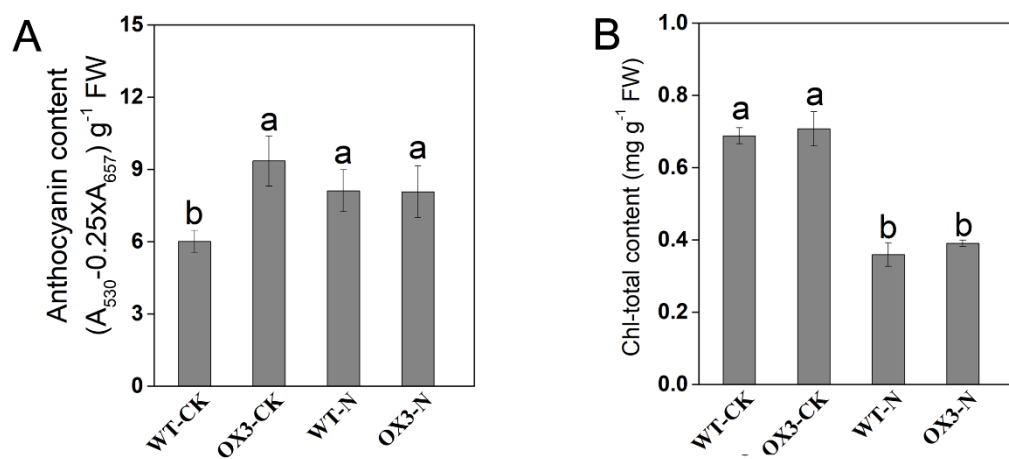

**Figure S2.** Effect of NaCl treatment on anthocyanin content (**A**) and total chlorophyll content (**B**) of WT (Col-0) and AeNAC83-overexpression transgenic (OX3) seedlings.
