# Supplementary material for: Ectopic Expression of AeNAC83, a NAC Transcription Factor from Abelmoschus esculentus, Inhibits Growth and Confers Tolerance to Salt Stress in Arabidopsis
Source: MDPI journal article supplement (doi:10.3390/ijms231710182), 2022-09-05
Supplement: s1 [file s1]

**Table S1.** Illumina-seq output statistics of 12 samples.

| Sample   | Clean Reads | Clean Bases   | Q20   | Q30   | GC content |
|----------|-------------|---------------|-------|-------|------------|
| WT-CK 1  | 22,831,614  | 6,823,195,164 | 97.88 | 94.37 | 46.05      |
| WT-CK 2  | 20,879,412  | 6,237,486,148 | 97.72 | 94.00 | 45.83      |
| WT-CK 3  | 19,297,979  | 5,771,005,098 | 97.93 | 94.49 | 45.72      |
| OX3-CK 1 | 19,190,301  | 5,740,086,572 | 97.74 | 94.11 | 45.60      |
| OX3-CK 2 | 21,141,667  | 6,322,250,946 | 97.72 | 94.04 | 45.59      |
| OX3-CK 3 | 20,570,137  | 6,153,537,524 | 97.86 | 94.40 | 45.61      |
| WT-N 1   | 19,468,147  | 5,799,741,630 | 97.77 | 94.19 | 45.39      |
| WT-N 2   | 21,085,699  | 6,284,851,384 | 97.62 | 93.96 | 46.12      |
| WT-N 3   | 19,239,340  | 5,737,199,530 | 97.61 | 93.91 | 45.36      |
| OX3-N 1  | 20,933,549  | 6,256,654,336 | 97.85 | 94.36 | 45.56      |
| OX3-N 2  | 19,311,053  | 5,773,478,276 | 97.77 | 94.19 | 45.53      |
| OX3-N 3  | 21,592,092  | 6,453,601,894 | 97.82 | 94.28 | 45.57      |
