# Supplementary material for: Ectopic Expression of AeNAC83, a NAC Transcription Factor from Abelmoschus esculentus, Inhibits Growth and Confers Tolerance to Salt Stress in Arabidopsis
Source: MDPI journal article supplement (doi:10.3390/ijms231710182), 2022-09-05
Supplement: s1 [file s1]

**Table S2. All DEGs in four comparison groups were listed.**

| geneID     | N83-CK1  | N83-CK2  | N83-CK3  | N83-N1   | N83-N2   | N83-N3   | WT-CK1   | WT-CK2   |
|------------|----------|----------|----------|----------|----------|----------|----------|----------|
| gene-AT2C  | 4.577599 | 4.975858 | 3.933429 | 5.560058 | 6.019353 | 5.927066 | 1.290866 | 1.488556 |
| gene-AT5C  | 10.56374 | 10.71535 | 11.02476 | 10.68624 | 9.438    | 10.28437 | 7.412613 | 7.815142 |
| gene-AT1C  | 3.479214 | 2.875879 | 2.738198 | 0.66187  | 0.683057 | 0.491823 | 1.294455 | 1.42393  |
| gene-AT5C  | 11.30281 | 10.96007 | 11.0497  | 32.02547 | 28.31489 | 31.04313 | 9.359926 | 10.38881 |
| gene-AT1C  | 2.401339 | 2.197073 | 3.245059 | 0.633904 | 0.796236 | 0.902389 | 4.225217 | 4.313984 |
| gene-AT1C  | 1.637659 | 2.883839 | 3.844619 | 3.432486 | 2.668509 | 3.893561 | 7.5683   | 6.512756 |
| gene-AT2C  | 3.467044 | 4.353713 | 5.073214 | 1.125255 | 1.600141 | 1.936968 | 9.371178 | 7.199521 |
| gene-AT5C  | 11.32688 | 10.15011 | 11.1659  | 11.25886 | 9.959128 | 10.47751 | 3.582478 | 3.211659 |
| gene-AT5C  | 8.179133 | 9.851901 | 9.577751 | 10.07643 | 8.350603 | 8.732809 | 12.15099 | 11.67314 |
| gene-AT2C  | 16.17506 | 15.42004 | 16.24733 | 8.688294 | 8.642314 | 9.135255 | 24.31232 | 27.00973 |
| gene-AT2C  | 63.1437  | 60.59316 | 65.58495 | 58.76346 | 53.20762 | 54.26329 | 92.46497 | 91.40608 |
| gene-AT2C  | 1.890157 | 2.321922 | 2.244958 | 3.30962  | 3.750779 | 3.58306  | 3.315152 | 3.170119 |
| gene-AT1C  | 0.808046 | 0.759825 | 0.622289 | 2.132633 | 2.614071 | 2.35977  | 1.685832 | 1.841305 |
| gene-AT2C  | 754.1722 | 785.3731 | 756.7799 | 472.4468 | 450.5837 | 468.8393 | 1236.634 | 1174.321 |
| gene-AT3C  | 6.752603 | 6.427538 | 7.749687 | 7.607152 | 8.528473 | 10.64255 | 6.106005 | 8.494687 |
| gene-AT3C  | 28.84082 | 28.29679 | 32.48663 | 18.07122 | 15.34129 | 14.66354 | 10.24029 | 10.54621 |
| gene-AT3C  | 15.00016 | 16.00021 | 15.55584 | 10.24454 | 10.03954 | 9.419615 | 22.05425 | 21.57357 |
| gene-AT2C  | 93.68265 | 99.51715 | 101.0284 | 213.818  | 219.5144 | 218.1868 | 92.32333 | 99.78637 |
| gene-AT1C  | 46.59234 | 43.53997 | 44.50977 | 21.87727 | 20.40475 | 22.407   | 47.73658 | 47.84626 |
| gene-AT2C  | 33.60972 | 34.73193 | 36.12122 | 23.76682 | 25.5125  | 25.04511 | 13.54617 | 13.65342 |
| gene-AT1C  | 22.7546  | 23.12154 | 20.19481 | 17.30965 | 15.35308 | 15.92768 | 22.65891 | 21.03701 |
| gene-AT5C  | 23.1459  | 23.88031 | 24.08121 | 25.62619 | 26.01608 | 26.53387 | 27.0256  | 26.49906 |
| gene-AT5C  | 0.753574 | 0.914216 | 0.904077 | 4.218724 | 3.714456 | 4.27199  | 2.462121 | 2.71205  |
| gene-AT2C  | 65.22364 | 65.66919 | 66.85492 | 18.08013 | 18.1155  | 19.64747 | 30.68832 | 34.79509 |
| gene-AT1C  | 2.535472 | 2.294016 | 3.299194 | 6.063204 | 5.778117 | 5.885484 | 2.586507 | 2.859922 |
| Arabidopsi | 0.583116 | 0.830652 | 0.813849 | 0.368474 | 0.401124 | 0.483441 | 0.190062 | 0.383602 |
| gene-AT3C  | 0.531041 | 0.375052 | 0.346741 | 0.326538 | 0.325052 | 0.768357 | 0.215632 | 0.427839 |
| gene-AT1C  | 0.881683 | 0.713609 | 0.559316 | 2.509634 | 2.004399 | 1.334926 | 1.149717 | 0.775279 |
| gene-AT4C  | 6.656528 | 5.818449 | 6.130471 | 0.824746 | 1.203278 | 1.413861 | 0        | 0.042229 |
| gene-AT2C  | 95.24638 | 84.17063 | 87.1061  | 53.97879 | 66.19451 | 64.40684 | 18.0251  | 20.22157 |
| gene-AT3C  | 18.81039 | 18.54001 | 19.38654 | 13.62078 | 15.91566 | 14.21684 | 29.20958 | 30.48956 |
| gene-AT5C  | 3.341695 | 3.006459 | 3.622417 | 7.107901 | 7.856015 | 5.860406 | 2.844847 | 2.319732 |
| gene-AT4C  | 25.16353 | 23.46742 | 24.23093 | 45.17174 | 48.67527 | 47.2971  | 14.85211 | 14.8916  |
| gene-AT4C  | 0.526217 | 0.186966 | 0.29516  | 0.985131 | 1.108659 | 1.339762 | 0.205317 | 0.133357 |
| gene-AT3C  | 6.425933 | 5.013836 | 6.446245 | 5.256896 | 4.835364 | 4.765589 | 11.06124 | 11.45725 |
| gene-AT4C  | 7.844226 | 6.668251 | 7.423862 | 8.839018 | 9.615707 | 7.939143 | 24.64285 | 28.62488 |
| gene-AT2C  | 4.451075 | 5.381802 | 6.062297 | 2.803252 | 2.769503 | 3.757449 | 5.717975 | 6.224804 |
| gene-AT5C  | 2.219392 | 2.899726 | 2.832852 | 1.58876  | 0.897783 | 1.714736 | 0.437304 | 0.64576  |
| gene-AT1C  | 20.52831 | 20.01624 | 20.24788 | 15.15404 | 12.38661 | 13.77305 | 26.40242 | 28.76178 |
| gene-AT2C  | 1.143134 | 1.105704 | 1.648869 | 1.158815 | 0.851843 | 1.346197 | 0.765653 | 0.97699  |
| gene-AT1C  | 2.59471  | 1.715062 | 2.670758 | 2.473204 | 1.225871 | 1.643076 | 4.240771 | 3.916312 |
| gene-AT1C  | 6.903265 | 6.058368 | 5.352623 | 2.98377  | 2.829616 | 3.320211 | 6.764503 | 6.335777 |
| gene-AT5C  | 5.457744 | 5.438921 | 4.754151 | 4.243247 | 5.255085 | 4.413672 | 6.241005 | 5.955097 |
| gene-AT5C  | 1.464023 | 1.634955 | 1.825236 | 2.442728 | 1.939277 | 2.78348  | 0.690503 | 0.661341 |
| gene-AT3C  | 2.510457 | 2.245968 | 2.057409 | 2.871495 | 2.699549 | 2.835646 | 0.701741 | 0.884647 |
| gene-AT4C  | 0.264043 | 0.706924 | 0.641712 | 1.402344 | 1.209563 | 1.980322 | 0.479191 | 1.054478 |
| gene-AT5C  | 11.14597 | 11.50617 | 13.00832 | 10.39022 | 10.10041 | 11.67732 | 23.84996 | 22.15534 |
| gene-AT4C  | 0.545339 | 0.705439 | 0.5977   | 0.409678 | 0.939272 | 0.730006 | 0.938032 | 0.572052 |
| gene-AT1C  | 5.927229 | 6.471956 | 5.407688 | 7.597126 | 7.496008 | 5.817646 | 10.34914 | 11.28758 |

|           |          |          |          |          |          |          |          |          |
|-----------|----------|----------|----------|----------|----------|----------|----------|----------|
| gene-AT5C | 8.994969 | 8.328506 | 9.692565 | 5.171298 | 6.596332 | 7.154352 | 10.42772 | 10.67618 |
| gene-AT4C | 4.32456  | 3.498191 | 3.649502 | 5.775964 | 5.562452 | 5.832437 | 11.33321 | 11.92855 |
| gene-AT3C | 0.404097 | 0.683371 | 0.276735 | 1.43482  | 1.861068 | 1.88259  | 0.759083 | 0.513523 |
| gene-AT3C | 19.00628 | 20.46723 | 19.74325 | 16.15379 | 16.77297 | 14.50747 | 27.21676 | 26.6578  |
| gene-AT4C | 14.69844 | 15.21873 | 13.86288 | 13.21566 | 12.64072 | 12.51186 | 8.438023 | 8.304382 |
| gene-AT2C | 0.400612 | 0.307389 | 0.289532 | 0.528795 | 0.162238 | 0.418916 | 0.277093 | 0.528539 |
| gene-AT3C | 9.624415 | 9.728236 | 7.443127 | 9.007657 | 9.777651 | 7.323987 | 4.967819 | 3.742217 |
| gene-AT5C | 45.40014 | 42.82619 | 44.16167 | 74.90027 | 75.37183 | 72.93548 | 40.16959 | 45.19968 |
| gene-AT4C | 7.815086 | 7.451686 | 8.037931 | 9.845583 | 8.615165 | 9.760102 | 5.602573 | 6.395146 |
| gene-AT1C | 0.935753 | 0.709016 | 0.584638 | 1.549558 | 2.10789  | 1.816394 | 0.984775 | 0.810788 |
| gene-AT2C | 0.613222 | 0.550952 | 0.536714 | 1.100635 | 2.001061 | 1.173864 | 0.113161 | 0.199234 |
| gene-AT5C | 11.32907 | 9.203467 | 10.73888 | 7.140362 | 5.219883 | 9.208457 | 0.863873 | 1.167159 |
| gene-AT4C | 1.85466  | 1.803224 | 1.735937 | 0.32094  | 0.421936 | 0.52469  | 1.290509 | 2.115643 |
| gene-AT1C | 45.13566 | 46.56791 | 44.58051 | 40.95488 | 42.39653 | 42.75976 | 60.8641  | 62.45107 |
| gene-AT5C | 0.838387 | 2.02095  | 1.332929 | 1.828593 | 2.079529 | 1.829176 | 1.532208 | 0.628839 |
| gene-AT1C | 4.512066 | 6.640485 | 6.173859 | 4.22727  | 3.30599  | 4.024535 | 6.86031  | 4.442848 |
| gene-AT4C | 18.49392 | 20.01385 | 20.51766 | 13.69317 | 12.6939  | 14.22481 | 27.3242  | 26.73573 |
| gene-AT1C | 4.568051 | 5.838507 | 6.486374 | 15.35184 | 15.73878 | 15.82232 | 5.451475 | 5.085068 |
| gene-AT1C | 2.390301 | 3.122245 | 3.005499 | 4.537783 | 3.866972 | 5.085478 | 1.367564 | 1.447567 |
| gene-AT2C | 0        | 0.14302  | 0.329351 | 0.256833 | 0.124736 | 0.268889 | 0.278888 | 0.203198 |
| gene-AT4C | 243.1942 | 238.3583 | 244.6469 | 193.3188 | 191.2032 | 191.5679 | 336.7663 | 361.8965 |
| gene-AT3C | 182.9579 | 183.5947 | 181.9917 | 80.08539 | 79.58005 | 81.52477 | 67.74532 | 68.53971 |
| gene-AT5C | 16.61643 | 14.06542 | 14.60005 | 15.76829 | 15.38866 | 15.41629 | 23.74495 | 23.41752 |
| gene-AT1C | 2.337005 | 2.072643 | 1.882199 | 1.791123 | 1.436324 | 1.387023 | 0.495287 | 0.665431 |
| gene-AT2C | 12.57409 | 14.63106 | 14.86873 | 11.31329 | 10.85123 | 11.11255 | 17.82575 | 21.18446 |
| gene-AT4C | 5.346705 | 6.760986 | 6.371969 | 9.4312   | 9.26893  | 9.096456 | 3.82019  | 3.151201 |
| gene-AT2C | 16.61623 | 18.88748 | 16.66707 | 14.73489 | 16.4123  | 14.80098 | 24.99584 | 25.09867 |
| gene-AT1C | 0.721202 | 0.957679 | 0.761275 | 0.473606 | 1.534783 | 1.100828 | 0.756138 | 0.731629 |
| gene-AT3C | 3.579171 | 4.387857 | 4.399158 | 5.134341 | 4.923782 | 5.594696 | 0.936081 | 1.026717 |
| gene-AT1C | 0.247465 | 0.139201 | 0.128719 | 0.731743 | 1.005106 | 0.811443 | 0.160155 | 0.119364 |
| gene-AT2C | 8.284741 | 7.624221 | 9.193724 | 12.44541 | 11.85654 | 12.6248  | 6.359453 | 6.040504 |
| gene-AT5C | 23.74254 | 24.35166 | 24.11487 | 17.10679 | 18.75994 | 20.12478 | 34.22984 | 34.95719 |
| gene-AT3C | 74.67752 | 73.3909  | 78.75615 | 116.912  | 113.7935 | 120.1285 | 24.18978 | 22.10328 |
| gene-AT2C | 26.2021  | 25.02062 | 23.89344 | 24.24631 | 23.44024 | 23.09913 | 38.51901 | 39.96852 |
| gene-AT1C | 11.46654 | 11.66122 | 12.78552 | 23.10534 | 21.9652  | 25.08623 | 2.652047 | 2.265055 |
| gene-AT5C | 2.326301 | 1.727184 | 1.893361 | 1.450542 | 1.640977 | 1.505655 | 0.177039 | 0.311118 |
| gene-AT4C | 221.2522 | 216.0887 | 218.8891 | 130.8942 | 136.6023 | 134.0135 | 135.8389 | 134.6656 |
| gene-AT2C | 12.41105 | 13.06683 | 12.51778 | 24.62813 | 23.7837  | 23.6893  | 11.35845 | 11.55447 |
| gene-AT5C | 19.59365 | 18.36971 | 18.47621 | 13.59968 | 13.50673 | 13.85741 | 16.7292  | 17.98837 |
| gene-AT4C | 30.705   | 28.7297  | 29.07495 | 25.28783 | 23.7817  | 25.04257 | 24.53369 | 26.49471 |
| gene-AT3C | 26.65622 | 24.63456 | 27.74791 | 55.05987 | 56.00791 | 56.08974 | 11.56674 | 10.74298 |
| gene-AT5C | 16.46008 | 17.85539 | 16.77839 | 12.31356 | 13.6737  | 14.32315 | 10.99678 | 11.85646 |
| gene-AT1C | 6.560092 | 6.195933 | 6.772435 | 11.10023 | 10.51725 | 10.40479 | 15.39263 | 13.26349 |
| gene-AT3C | 5.836115 | 5.718344 | 5.741957 | 4.374107 | 4.708249 | 4.407032 | 2.483481 | 2.249168 |
| gene-AT2C | 6.867115 | 7.558598 | 5.743071 | 7.413185 | 9.133923 | 9.476798 | 8.406385 | 7.748215 |
| gene-AT4C | 2.638095 | 2.75264  | 3.172452 | 2.011609 | 2.688482 | 2.562567 | 3.12576  | 2.647313 |
| gene-AT5C | 2.667013 | 2.099708 | 2.738354 | 2.606997 | 2.110853 | 2.926364 | 2.909558 | 4.357356 |
| gene-AT4C | 25.63468 | 27.05225 | 19.5289  | 56.21655 | 77.60038 | 62.3054  | 11.31887 | 17.45619 |
| gene-AT3C | 6.595204 | 8.395597 | 7.359986 | 6.597771 | 8.454794 | 7.352163 | 12.39976 | 9.89828  |
| gene-AT3C | 18.57533 | 18.0504  | 16.89547 | 32.2787  | 32.54498 | 31.77315 | 23.01937 | 23.30806 |
| gene-AT5C | 7.925704 | 8.964309 | 7.949548 | 4.7805   | 4.258037 | 5.370856 | 12.3489  | 13.217   |

|            |          |          |          |          |          |          |          |          |
|------------|----------|----------|----------|----------|----------|----------|----------|----------|
| gene-AT4C  | 4.012262 | 4.430698 | 4.056123 | 6.692467 | 6.96276  | 6.146708 | 10.8714  | 11.20058 |
| gene-AT2C  | 3.041799 | 2.980253 | 3.295085 | 2.145522 | 2.287809 | 2.364868 | 3.590047 | 4.184984 |
| gene-AT3C  | 1.947586 | 2.109067 | 1.680276 | 1.156079 | 0.610801 | 0.639165 | 3.061154 | 3.502561 |
| gene-AT3C  | 6.722224 | 6.981831 | 7.785026 | 31.35958 | 29.91884 | 31.68434 | 5.388951 | 5.330131 |
| gene-AT5C  | 0.649184 | 0.711218 | 0.493109 | 0.460664 | 0.590555 | 0.404254 | 0.133237 | 0.093361 |
| gene-AT4C  | 3.113123 | 2.423222 | 2.653005 | 2.276775 | 2.029663 | 2.720502 | 1.121773 | 1.238313 |
| gene-AT1C  | 2.871751 | 3.504766 | 2.824358 | 1.636958 | 0.812432 | 0.859603 | 4.021294 | 4.082539 |
| gene-AT2C  | 3.640651 | 3.512039 | 2.676924 | 3.842647 | 3.74898  | 3.838986 | 4.183378 | 3.758557 |
| gene-AT4C  | 14.78947 | 13.67596 | 12.73626 | 5.991581 | 5.744775 | 5.762094 | 13.02612 | 13.42457 |
| gene-AT1C  | 3.236338 | 3.702208 | 1.761252 | 1.021349 | 0.533161 | 1.097799 | 4.381565 | 5.12771  |
| gene-AT1C  | 0.622175 | 1.019069 | 0.604303 | 0.290863 | 0.446795 | 0.516459 | 0.532189 | 0.839637 |
| gene-AT1C  | 2.831797 | 2.292412 | 2.311508 | 1.813192 | 2.08148  | 2.570293 | 5.858571 | 5.527677 |
| gene-AT5C  | 8.256047 | 8.293741 | 8.752466 | 5.497819 | 5.425395 | 5.321885 | 3.4629   | 2.964008 |
| gene-AT1C  | 0.070359 | 0.570317 | 0.365056 | 0.048738 | 0.726353 | 0.91056  | 0.315268 | 0.483627 |
| gene-AT1C  | 42.9895  | 45.19538 | 44.8196  | 26.44745 | 24.89351 | 27.26296 | 16.05998 | 16.30603 |
| gene-AT5C  | 5.391464 | 4.937868 | 5.594079 | 7.155199 | 6.628714 | 6.270865 | 7.720567 | 6.70309  |
| gene-AT4C  | 13.91473 | 13.78216 | 14.597   | 12.56654 | 11.15532 | 12.44829 | 19.57876 | 21.47069 |
| gene-AT1C  | 1.471761 | 1.961995 | 1.912714 | 1.032868 | 1.01123  | 0.793572 | 0.296687 | 0.296264 |
| gene-AT3C  | 42.81619 | 41.39799 | 42.28822 | 18.12153 | 16.61329 | 17.6072  | 39.19022 | 43.61132 |
| gene-AT3C  | 60.93535 | 57.29219 | 59.4437  | 101.6543 | 96.38494 | 102.0611 | 16.34474 | 13.43485 |
| gene-AT5C  | 25.26056 | 27.17899 | 29.44955 | 23.53606 | 23.84276 | 23.96958 | 10.85457 | 12.06237 |
| gene-AT2C  | 1.418267 | 1.687486 | 2.566696 | 2.086755 | 2.131199 | 2.48757  | 2.748686 | 3.265865 |
| gene-AT4C  | 23.3521  | 21.4602  | 22.82279 | 11.47617 | 8.696126 | 9.020021 | 23.30146 | 24.18568 |
| gene-AT1C  | 2.771355 | 2.979089 | 3.285222 | 2.072704 | 1.848914 | 1.719091 | 4.94943  | 5.54668  |
| gene-AT3C  | 3.504466 | 4.393812 | 5.116239 | 7.357883 | 6.358043 | 6.730171 | 2.643136 | 2.53052  |
| gene-AT1C  | 0.518278 | 0.573035 | 0.435754 | 0.914399 | 1.320019 | 0.932943 | 1.015727 | 1.079267 |
| gene-AT1C  | 7.127395 | 8.128267 | 7.632195 | 3.939154 | 3.723793 | 3.205761 | 12.13915 | 12.73617 |
| gene-AT3C  | 0.909935 | 0.880748 | 0.644433 | 1.540163 | 1.558274 | 1.236593 | 0.408009 | 0.286474 |
| gene-AT3C  | 33.85135 | 34.79917 | 37.73844 | 32.35659 | 32.88299 | 31.06123 | 25.21009 | 23.56825 |
| gene-AT4C  | 7.303217 | 7.351005 | 7.537692 | 4.339826 | 3.924152 | 4.85751  | 2.535758 | 2.729052 |
| gene-AT5C  | 4.252276 | 4.849641 | 5.669125 | 3.831354 | 3.136911 | 3.596424 | 3.880947 | 2.365412 |
| gene-AT3C  | 4.549305 | 4.354509 | 3.734854 | 1.396174 | 1.157398 | 1.162541 | 4.674288 | 5.591    |
| gene-AT5C  | 19.96906 | 20.18189 | 20.09908 | 19.27903 | 20.18572 | 20.52326 | 9.973923 | 10.52904 |
| gene-AT5C  | 5.601378 | 7.206297 | 6.322175 | 13.73985 | 12.25592 | 12.36676 | 2.118395 | 2.791633 |
| gene-AT3C  | 9.790036 | 11.80232 | 12.91803 | 8.449344 | 6.259309 | 7.616596 | 13.05994 | 15.74874 |
| gene-AT5C  | 16.24313 | 16.44743 | 15.72627 | 20.99674 | 20.25102 | 20.29407 | 5.886994 | 5.98511  |
| gene-AT5C  | 0.050859 | 0.022807 | 0.141997 | 0.152212 | 0.095225 | 0.068716 | 0.38525  | 0.509851 |
| gene-AT4C  | 3.146294 | 3.36545  | 2.834075 | 3.379762 | 3.627007 | 3.255895 | 4.003933 | 4.819269 |
| gene-AT1C  | 1.212253 | 1.706564 | 1.540113 | 1.680378 | 2.101526 | 1.712176 | 0.935042 | 0.51575  |
| Arabidopsi | 1.399703 | 1.506416 | 1.303088 | 0.172192 | 0.564189 | 0.717613 | 0.097693 | 0        |
| gene-AT3C  | 18.37869 | 17.44356 | 16.9616  | 7.307126 | 9.247971 | 8.288943 | 21.50351 | 24.29322 |
| gene-AT1C  | 21.57805 | 25.15951 | 47.70029 | 4.870177 | 6.892437 | 17.89191 | 83.7686  | 69.09708 |
| gene-AT1C  | 893.8192 | 896.3174 | 922.7979 | 484.3582 | 477.7105 | 476.3204 | 1538.525 | 1550.597 |
| gene-AT2C  | 6.342207 | 5.784056 | 5.591908 | 5.373302 | 3.442854 | 5.087108 | 1.267663 | 1.140617 |
| gene-AT1C  | 0.326475 | 0.058246 | 0.227588 | 0.704449 | 1.537008 | 1.049276 | 0        | 0        |
| gene-AT1C  | 1.092983 | 1.110745 | 1.732142 | 1.140216 | 1.082004 | 1.102812 | 3.493957 | 1.879529 |
| gene-AT1C  | 4.702106 | 4.147306 | 5.050467 | 5.610297 | 6.01901  | 6.428871 | 1.770349 | 1.68959  |
| gene-AT4C  | 18.70646 | 17.37942 | 20.45099 | 14.34322 | 12.28649 | 14.9993  | 23.68307 | 24.39306 |
| gene-AT5C  | 2.170279 | 1.865769 | 1.853338 | 2.844803 | 3.510381 | 2.213081 | 3.495803 | 4.502989 |
| gene-AT3C  | 1.713068 | 2.082199 | 1.775232 | 6.253724 | 6.128244 | 6.579699 | 2.222338 | 1.779004 |
| gene-AT5C  | 67.67246 | 68.66984 | 69.98847 | 62.41076 | 65.39211 | 65.16674 | 48.72588 | 51.87011 |

|           |          |          |          |          |          |          |          |          |
|-----------|----------|----------|----------|----------|----------|----------|----------|----------|
| gene-AT2C | 0.303429 | 0        | 0.127285 | 1.865152 | 1.187392 | 1.898168 | 0.772296 | 0.653706 |
| gene-AT4C | 9.113698 | 10.3071  | 9.10587  | 6.134542 | 5.288344 | 6.4258   | 13.87821 | 12.6697  |
| gene-AT2C | 9.939531 | 9.459467 | 10.03501 | 7.220983 | 8.332801 | 7.790099 | 2.535666 | 2.204386 |
| gene-AT5C | 10.92195 | 9.770694 | 10.92729 | 8.677075 | 7.964658 | 9.056503 | 0.779677 | 0.814523 |
| gene-AT1C | 12.8685  | 8.599607 | 11.75412 | 6.619292 | 5.562778 | 6.343806 | 27.03176 | 29.1718  |
| gene-AT3C | 140.5869 | 136.194  | 129.0255 | 71.70898 | 72.06921 | 73.22749 | 179.1606 | 177.9403 |
| gene-AT4C | 4.94534  | 4.257928 | 4.580117 | 6.044114 | 7.69207  | 6.424069 | 4.030457 | 4.794202 |
| gene-AT1C | 41.53953 | 41.66038 | 42.04736 | 43.62458 | 41.07248 | 42.02159 | 35.12863 | 33.51628 |
| gene-AT2C | 44.47553 | 44.32349 | 48.22326 | 16.98175 | 16.42626 | 17.15256 | 36.56682 | 43.0402  |
| gene-AT5C | 0.450045 | 0.787997 | 0.883898 | 0.526229 | 0.448932 | 0.361153 | 0.920517 | 1.106179 |
| gene-AT5C | 1.950814 | 1.668696 | 1.833606 | 2.708393 | 2.380835 | 2.40426  | 0.656165 | 0.729268 |
| gene-AT3C | 6.637464 | 6.695431 | 7.729053 | 2.537957 | 3.242778 | 3.927635 | 3.462713 | 3.089769 |
| gene-AT1C | 0.302238 | 0.070456 | 0.414429 | 0.747616 | 1.038035 | 0.931573 | 0.033729 | 0.162708 |
| gene-AT2C | 5.583073 | 5.937237 | 5.600354 | 6.547697 | 6.070765 | 6.219846 | 2.314257 | 1.67189  |
| gene-AT2C | 9.143665 | 10.28937 | 8.598149 | 11.2526  | 9.70186  | 11.00315 | 8.405851 | 8.516188 |
| gene-AT5C | 230.0742 | 224.7412 | 226.8965 | 185.9691 | 183.8101 | 182.9411 | 211.5751 | 221.3732 |
| gene-AT5C | 9.586466 | 7.9913   | 8.575846 | 4.677283 | 4.784483 | 3.856203 | 9.214659 | 8.451165 |
| gene-AT3C | 5.219512 | 5.48822  | 6.397471 | 5.368934 | 7.187004 | 5.196653 | 2.252284 | 2.736101 |
| gene-AT3C | 7.632679 | 8.400259 | 10.06542 | 8.929121 | 10.33621 | 8.382887 | 16.51431 | 13.68736 |
| gene-AT3C | 57.53808 | 56.67075 | 55.90145 | 82.25615 | 80.67047 | 82.52252 | 25.09654 | 25.47619 |
| gene-AT1C | 5.955709 | 6.804707 | 7.859583 | 4.888164 | 4.665934 | 4.524444 | 3.954683 | 2.49831  |
| gene-AT3C | 1.814895 | 0.879306 | 0.856728 | 0.315415 | 0.609885 | 0.447909 | 1.858314 | 2.03165  |
| gene-AT3C | 18.78048 | 16.94368 | 19.03443 | 15.27804 | 12.28449 | 15.59802 | 26.42549 | 25.67496 |
| gene-AT4C | 4.925263 | 3.98635  | 4.86216  | 9.006109 | 9.648806 | 9.91332  | 3.927683 | 4.047478 |
| gene-AT2C | 4.849886 | 3.821468 | 5.014565 | 1.057648 | 1.241456 | 0.928513 | 0.085742 | 0.032889 |
| gene-AT2C | 13.03662 | 13.3997  | 13.98146 | 19.6202  | 19.41596 | 20.97757 | 8.505821 | 9.298319 |
| gene-AT1C | 1.205852 | 1.243367 | 0.933792 | 2.056353 | 1.928264 | 1.660176 | 1.128479 | 1.273588 |
| gene-AT5C | 27.41324 | 25.43615 | 27.70207 | 26.78927 | 27.59826 | 25.52385 | 26.12124 | 30.40721 |
| gene-AT1C | 0.010866 | 0        | 0        | 0.030066 | 0        | 0.028868 | 0.030656 | 0.015385 |
| gene-AT4C | 7.080225 | 8.906923 | 8.307815 | 6.664815 | 7.290513 | 6.892311 | 2.979824 | 2.783322 |
| gene-AT5C | 5.072066 | 4.888407 | 5.622946 | 11.09383 | 12.31007 | 10.21538 | 4.245451 | 4.501221 |
| gene-AT2C | 0.211115 | 0.334685 | 0.167856 | 0.05522  | 0.08997  | 0.028486 | 0.515059 | 0.611344 |
| gene-AT3C | 8.680419 | 8.351017 | 9.877261 | 6.797962 | 8.572848 | 6.969118 | 10.50928 | 9.926744 |
| gene-AT1C | 0.323689 | 0.592751 | 0.382091 | 2.464275 | 2.294873 | 2.291527 | 0.18208  | 0        |
| gene-AT2C | 19.84285 | 23.676   | 22.29475 | 27.51951 | 26.14338 | 26.67186 | 7.885571 | 7.351705 |
| gene-AT5C | 19.32797 | 18.99007 | 17.9383  | 5.758705 | 5.763538 | 5.739374 | 10.57415 | 10.35106 |
| gene-AT4C | 4.630406 | 5.350882 | 4.515065 | 3.576928 | 4.752261 | 4.309231 | 2.034776 | 2.213609 |
| gene-AT3C | 20.46312 | 21.52765 | 19.41562 | 19.04456 | 20.24766 | 20.39955 | 35.17656 | 39.27157 |
| gene-AT3C | 8.419194 | 7.852824 | 7.787086 | 6.533311 | 5.672878 | 5.214597 | 13.50387 | 14.2652  |
| gene-AT3C | 6.253475 | 7.286184 | 6.527555 | 4.546512 | 5.920445 | 4.761533 | 4.978808 | 5.335847 |
| gene-AT4C | 1.329447 | 1.007966 | 1.312591 | 0.405247 | 0.39795  | 0.209707 | 1.711193 | 1.306167 |
| gene-AT4C | 8.470805 | 8.521626 | 9.722278 | 4.03235  | 3.15024  | 3.197979 | 14.28913 | 14.13979 |
| gene-AT3C | 230.7535 | 221.1081 | 230.5011 | 110.8976 | 115.952  | 111.8777 | 113.7149 | 119.2429 |
| gene-AT1C | 0.497857 | 0.617976 | 0.482123 | 0.985541 | 0.69414  | 0.84387  | 1.063374 | 1.271303 |
| gene-AT5C | 0.669354 | 0.339107 | 0.558692 | 0.908281 | 0.710693 | 0.822784 | 1.114778 | 0.960876 |
| gene-AT5C | 2.870073 | 3.175964 | 2.864361 | 2.650717 | 2.145882 | 2.864805 | 0.953383 | 1.281079 |
| gene-AT4C | 1.154828 | 0.931593 | 0.798081 | 0.67092  | 0.667039 | 0.825793 | 0.244465 | 0.586659 |
| gene-AT2C | 7.988239 | 7.069348 | 6.464797 | 3.094729 | 3.621246 | 3.363495 | 2.161339 | 2.371766 |
| gene-AT2C | 0.985179 | 0.806813 | 0.911038 | 0.942996 | 0.649226 | 0.639698 | 1.990299 | 2.080786 |
| gene-AT4C | 11.28935 | 11.4108  | 9.87924  | 6.848691 | 5.455971 | 7.51003  | 17.56873 | 21.39022 |
| gene-AT3C | 9.730729 | 10.07861 | 9.762004 | 5.268681 | 5.341974 | 6.168488 | 3.715804 | 4.031691 |

|            |          |          |          |          |          |          |          |          |
|------------|----------|----------|----------|----------|----------|----------|----------|----------|
| gene-AT5C  | 60.06019 | 58.09776 | 57.52201 | 44.96443 | 45.49198 | 46.47325 | 87.00642 | 93.07435 |
| gene-AT5C  | 0.855293 | 1.244985 | 1.495358 | 2.024465 | 1.214463 | 2.235657 | 1.703346 | 0.901728 |
| gene-AT5C  | 10.25886 | 10.54976 | 9.248989 | 14.44212 | 15.60063 | 16.86535 | 9.260661 | 11.14916 |
| gene-AT3C  | 2.060248 | 1.74024  | 1.967043 | 2.584322 | 2.394249 | 1.677545 | 1.198189 | 1.358663 |
| gene-AT3C  | 2.557723 | 2.388291 | 2.228244 | 1.112866 | 1.734864 | 1.789369 | 3.030688 | 3.066414 |
| gene-AT5C  | 5.905695 | 6.017686 | 5.844929 | 3.800451 | 4.120525 | 3.449687 | 9.297481 | 9.3719   |
| gene-AT1C  | 3.963753 | 2.664405 | 3.297856 | 3.182508 | 3.68503  | 4.14886  | 3.867498 | 4.384546 |
| gene-AT1C  | 0.829397 | 0.984492 | 0.928107 | 1.368252 | 2.152083 | 1.564926 | 0.494763 | 0.627431 |
| gene-AT5C  | 23.38243 | 22.12743 | 23.75368 | 4.311756 | 4.728782 | 4.158962 | 38.66786 | 37.99085 |
| gene-AT3C  | 3.112158 | 2.757987 | 2.259018 | 2.717404 | 2.970247 | 2.569467 | 1.069211 | 1.082477 |
| Arabidopsi | 1.62215  | 1.61114  | 1.691446 | 1.778499 | 2.458635 | 2.9039   | 0.749093 | 0.834693 |
| Arabidopsi | 5.806135 | 5.250912 | 6.149989 | 10.26506 | 9.691575 | 9.882351 | 5.292066 | 5.65033  |
| gene-AT3C  | 0.572144 | 0.301727 | 0.79699  | 0.515285 | 1.167284 | 0.70611  | 0.471468 | 0.12016  |
| gene-AT2C  | 0.133225 | 0.217084 | 0.214923 | 1.179151 | 1.27709  | 0.986417 | 0        | 0.241514 |
| gene-AT1C  | 0.587593 | 0.643337 | 0.518159 | 0.868816 | 0.999655 | 0.794094 | 0.068037 | 0.270203 |
| gene-AT1C  | 9.976843 | 11.58041 | 7.879023 | 4.563464 | 2.664367 | 5.036596 | 4.579472 | 3.238271 |
| gene-AT5C  | 7.106634 | 6.923625 | 8.349385 | 3.319982 | 3.010106 | 3.381015 | 0.948786 | 1.570218 |
| gene-AT3C  | 26.45076 | 28.62235 | 28.35837 | 22.66602 | 27.76326 | 26.82704 | 48.22272 | 49.72963 |
| gene-AT5C  | 0.25     | 0.307081 | 0.351499 | 2.017289 | 2.17176  | 2.365742 | 0.316231 | 0.520082 |
| gene-AT2C  | 2.659438 | 2.886214 | 2.280998 | 2.706669 | 1.86234  | 1.912559 | 1.413036 | 1.003125 |
| gene-AT1C  | 1.653161 | 1.513439 | 1.180075 | 0.678325 | 0.998115 | 0.973173 | 2.066136 | 2.357007 |
| gene-AT1C  | 19.66847 | 19.2548  | 20.83016 | 19.49779 | 22.58505 | 20.72454 | 38.75035 | 40.2629  |
| gene-AT4C  | 0.99326  | 1.508549 | 0.898361 | 1.235233 | 1.256256 | 1.340473 | 0.332432 | 0.373013 |
| Arabidopsi | 1.198482 | 1.400608 | 1.632403 | 1.614327 | 1.959133 | 1.900223 | 0.013059 | 0.035754 |
| gene-AT1C  | 4.276789 | 4.723098 | 5.351816 | 4.936907 | 4.204443 | 2.70282  | 7.335573 | 5.735768 |
| gene-AT3C  | 3.65549  | 3.999074 | 4.432622 | 7.300351 | 8.358423 | 9.87918  | 6.091086 | 6.561021 |
| gene-AT5C  | 5.203357 | 4.942996 | 5.678959 | 5.623516 | 5.763519 | 6.098945 | 2.068081 | 2.139299 |
| gene-AT5C  | 0.624439 | 0.550661 | 0.781207 | 1.044125 | 1.120338 | 1.135834 | 0.224298 | 0.295194 |
| gene-AT1C  | 3.69292  | 4.025308 | 3.611593 | 4.336097 | 4.342098 | 3.563707 | 5.912095 | 5.433056 |
| gene-AT3C  | 3.416367 | 2.963558 | 3.619591 | 0.821792 | 1.191853 | 1.523821 | 6.619192 | 4.173298 |
| gene-AT3C  | 47.18235 | 45.62425 | 45.08644 | 35.44228 | 36.19165 | 35.95499 | 70.96131 | 75.78523 |
| gene-AT2C  | 143.4775 | 142.1434 | 152.1492 | 123.9489 | 120.3965 | 117.2844 | 244.0357 | 253.954  |
| gene-AT3C  | 0.778847 | 0.60311  | 0.772349 | 0.740274 | 1.267215 | 0.586606 | 0.377693 | 0.594955 |
| gene-AT5C  | 40.33961 | 40.21775 | 38.84617 | 26.44183 | 25.29532 | 23.69427 | 68.25656 | 73.67589 |
| gene-AT5C  | 6.682024 | 5.262902 | 7.073419 | 11.31409 | 10.20339 | 9.051729 | 10.51017 | 9.378696 |
| gene-AT1C  | 12.41709 | 13.95573 | 12.80022 | 14.51682 | 17.13451 | 15.60017 | 5.786841 | 6.422443 |
| gene-AT5C  | 59.3938  | 57.61424 | 61.01345 | 41.95767 | 41.41425 | 39.50841 | 53.14864 | 49.7505  |
| gene-AT1C  | 52.92508 | 55.62071 | 51.36324 | 57.09379 | 56.3908  | 59.605   | 59.0964  | 63.71401 |
| gene-AT5C  | 0.95543  | 1.460051 | 1.388655 | 1.214739 | 0.438836 | 0.607176 | 1.147793 | 1.05721  |
| gene-AT2C  | 319.0331 | 311.0764 | 321.2571 | 166.691  | 167.8423 | 161.5917 | 526.803  | 543.6436 |
| gene-AT1C  | 26.02025 | 21.33278 | 24.49449 | 21.33903 | 19.32844 | 20.04371 | 13.53881 | 12.73397 |
| gene-AT5C  | 23.94606 | 19.72234 | 23.02268 | 20.331   | 20.35865 | 22.96201 | 24.92753 | 24.33239 |
| gene-AT4C  | 1.151168 | 0.716663 | 0.649453 | 0.447241 | 0.909784 | 0.38284  | 0.801046 | 0.826892 |
| gene-AT3C  | 61.19015 | 64.99757 | 62.53321 | 61.7732  | 62.6005  | 60.68671 | 119.8839 | 111.3456 |
| gene-AT1C  | 7.851128 | 8.195485 | 8.527533 | 41.51085 | 38.07591 | 41.53941 | 13.74334 | 12.46594 |
| gene-AT1C  | 1.756923 | 1.779963 | 2.027727 | 1.891708 | 1.421983 | 1.858068 | 2.5576   | 2.264551 |
| gene-AT3C  | 52.34697 | 53.92691 | 60.72158 | 43.5443  | 43.1227  | 41.84941 | 69.74837 | 71.75157 |
| gene-AT3C  | 11.4681  | 10.42958 | 10.17176 | 6.973497 | 4.912467 | 6.03742  | 1.993058 | 1.772051 |
| gene-AT4C  | 0.021085 | 0        | 0        | 1.617924 | 1.395588 | 2.260786 | 0        | 0.065741 |
| gene-AT5C  | 2.508628 | 2.037711 | 3.000651 | 2.902657 | 1.728626 | 2.53334  | 4.219256 | 5.197149 |
| gene-AT5C  | 9.517963 | 13.68697 | 11.41664 | 8.914211 | 9.203641 | 10.05857 | 14.03407 | 14.96661 |

|            |          |          |          |          |          |          |          |          |
|------------|----------|----------|----------|----------|----------|----------|----------|----------|
| gene-AT3C  | 0.098601 | 1.388878 | 0.966823 | 2.942206 | 2.030511 | 2.530453 | 1.311714 | 0.981578 |
| gene-AT1C  | 0.128925 | 0.364331 | 0.4486   | 0.768633 | 1.136826 | 0.833765 | 0.379764 | 0.535143 |
| gene-AT3C  | 4.053532 | 5.057834 | 4.736813 | 5.005955 | 4.531641 | 3.795743 | 1.973152 | 2.427448 |
| gene-AT2C  | 97.94502 | 98.11959 | 100.4816 | 45.2642  | 45.35111 | 45.03466 | 62.64237 | 63.87751 |
| gene-AT4C  | 25.28829 | 22.30873 | 25.93366 | 35.16254 | 34.22636 | 32.43021 | 12.14056 | 10.40647 |
| gene-AT1C  | 39.45424 | 35.78476 | 36.61059 | 33.93428 | 32.66178 | 37.85157 | 63.18794 | 67.18588 |
| gene-AT4C  | 6.925163 | 7.062219 | 7.966986 | 13.91893 | 14.40155 | 15.75907 | 4.368158 | 5.033632 |
| gene-AT5C  | 67.29022 | 66.05528 | 67.08197 | 31.0641  | 29.74914 | 30.47422 | 239.1126 | 243.5584 |
| gene-AT1C  | 2.22206  | 2.367773 | 2.112155 | 6.52242  | 5.330904 | 6.428613 | 1.6001   | 1.483722 |
| gene-AT2C  | 13.56191 | 11.11704 | 12.93984 | 37.63677 | 34.41996 | 33.80497 | 16.39395 | 18.68091 |
| gene-AT1C  | 6.350683 | 6.747904 | 6.285038 | 3.885818 | 4.21836  | 3.284676 | 11.67274 | 11.7387  |
| gene-AT5C  | 4.300229 | 4.712241 | 5.119202 | 6.720973 | 6.184369 | 7.034829 | 5.691667 | 5.984081 |
| gene-AT2C  | 156.6314 | 159.4465 | 160.12   | 122.4219 | 120.9955 | 126.9445 | 234.9061 | 247.971  |
| gene-AT5C  | 144.1845 | 159.7053 | 166.3216 | 40.01225 | 38.54159 | 35.09351 | 135.9728 | 134.6331 |
| gene-AT2C  | 7.531531 | 7.941289 | 7.655073 | 5.04344  | 5.217806 | 5.665682 | 5.164385 | 5.292733 |
| gene-AT5C  | 12.99004 | 11.88274 | 12.79221 | 25.73406 | 26.69995 | 31.40638 | 30.71516 | 26.95271 |
| gene-AT5C  | 0.217005 | 0.397198 | 0.174563 | 0.111156 | 0.239597 | 0.425486 | 0.456302 | 0.509341 |
| gene-AT3C  | 47.77417 | 49.24943 | 48.30693 | 45.39344 | 45.3879  | 44.06385 | 55.05504 | 54.75806 |
| gene-AT2C  | 20.22018 | 22.61917 | 19.38536 | 18.4869  | 19.45296 | 18.18217 | 7.690712 | 5.612789 |
| gene-AT3C  | 41.86491 | 39.25936 | 42.15315 | 31.7021  | 33.37536 | 34.37157 | 60.53402 | 58.72155 |
| gene-AT1C  | 0.706087 | 0.501186 | 0.697643 | 0.884969 | 0.690804 | 0.898046 | 0.536255 | 0.610289 |
| gene-AT3C  | 7.854569 | 7.588481 | 7.589561 | 9.848154 | 9.432496 | 10.04472 | 10.44421 | 11.68818 |
| gene-AT5C  | 15.68004 | 16.93498 | 15.17653 | 6.931963 | 7.48521  | 6.745403 | 13.31607 | 12.91398 |
| gene-AT2C  | 7.068809 | 7.48362  | 7.688075 | 6.681754 | 6.740676 | 6.146976 | 12.94052 | 13.26404 |
| gene-AT1C  | 169.7189 | 164.6758 | 169.4463 | 108.6306 | 108.3251 | 106.9069 | 160.6389 | 167.3982 |
| gene-AT4C  | 1.07752  | 0.60015  | 1.106914 | 1.230693 | 1.200674 | 1.002728 | 0.612205 | 0.211584 |
| gene-AT3C  | 2.977932 | 3.049402 | 2.446283 | 1.715352 | 2.25269  | 1.513439 | 1.840454 | 1.733498 |
| gene-AT2C  | 2.131695 | 1.745799 | 2.40139  | 3.791787 | 3.314717 | 3.539398 | 2.071978 | 2.178088 |
| gene-AT1C  | 7.293173 | 6.570457 | 7.226798 | 5.510419 | 5.933708 | 5.761294 | 2.061456 | 1.741454 |
| gene-AT3C  | 3.183902 | 3.598808 | 3.497998 | 2.173    | 2.055448 | 2.429934 | 1.445807 | 1.414397 |
| gene-AT3C  | 2.376815 | 2.314258 | 3.03181  | 2.257667 | 2.042785 | 1.785409 | 3.184186 | 2.730257 |
| gene-AT2C  | 11.22719 | 11.02434 | 11.08503 | 32.22172 | 30.63985 | 30.94446 | 8.065171 | 8.918841 |
| gene-AT2C  | 6.549009 | 5.253371 | 6.69464  | 10.00093 | 10.26718 | 10.14939 | 7.237518 | 7.411976 |
| gene-AT4C  | 3.864012 | 2.946651 | 2.600913 | 4.629947 | 4.929338 | 4.55492  | 2.611849 | 3.013548 |
| gene-AT1C  | 11.58608 | 12.79708 | 14.02089 | 14.99459 | 15.01038 | 14.8558  | 11.31183 | 10.27112 |
| gene-AT5C  | 8.973419 | 8.072039 | 7.721951 | 5.707786 | 6.08441  | 4.595372 | 14.17439 | 14.43098 |
| gene-AT5C  | 1.376301 | 1.547528 | 1.132825 | 3.501363 | 3.415689 | 2.496056 | 2.015944 | 1.825323 |
| gene-AT3C  | 9.119854 | 10.02545 | 10.93113 | 13.40541 | 14.41877 | 13.36042 | 17.7147  | 15.91592 |
| gene-AT1C  | 0.169523 | 0.28447  | 0        | 0.212205 | 0.381774 | 0.376158 | 0.287064 | 0.263166 |
| gene-AT5C  | 0.386337 | 0.365691 | 0.274141 | 1.06082  | 1.132801 | 1.04103  | 0.867834 | 1.057715 |
| gene-AT3C  | 160.8224 | 157.3116 | 162.0657 | 97.48376 | 95.23343 | 93.47067 | 226.0476 | 245.1247 |
| Arabidopsi | 0.281409 | 0.244053 | 0.328512 | 0.661457 | 0.38235  | 0.464411 | 0.351883 | 0.32531  |
| gene-AT1C  | 14.12556 | 15.12701 | 15.2614  | 4.104669 | 5.066076 | 3.608071 | 9.323449 | 9.898174 |
| gene-AT1C  | 16.16591 | 16.93388 | 16.95724 | 11.7354  | 10.74738 | 11.59014 | 14.94308 | 15.78872 |
| gene-AT1C  | 41.6534  | 37.76576 | 40.21949 | 37.93519 | 35.25703 | 37.3173  | 32.44922 | 32.31636 |
| gene-AT2C  | 119.5909 | 110.0371 | 116.5215 | 85.86156 | 89.73071 | 88.77117 | 196.7062 | 202.9198 |
| gene-AT1C  | 5.353589 | 7.928957 | 6.53304  | 17.10146 | 16.2164  | 17.47394 | 4.997972 | 5.108033 |
| gene-AT5C  | 0.839657 | 1.117655 | 1.007924 | 4.618219 | 4.359303 | 4.900955 | 0.534324 | 0.449886 |
| gene-AT2C  | 3.159404 | 3.047224 | 3.345213 | 3.336099 | 3.011663 | 3.921283 | 1.363522 | 1.342138 |
| gene-AT5C  | 2.06845  | 1.635715 | 3.09932  | 2.420126 | 2.728945 | 2.808704 | 4.7072   | 3.041495 |
| gene-AT3C  | 9.13623  | 8.250082 | 8.419168 | 9.624036 | 9.121963 | 9.484062 | 12.39808 | 12.46406 |

|            |          |          |          |          |          |          |          |          |
|------------|----------|----------|----------|----------|----------|----------|----------|----------|
| gene-AT2C  | 12.55102 | 12.7309  | 11.7343  | 14.18868 | 14.74669 | 14.24373 | 3.532669 | 5.125851 |
| gene-AT2C  | 20.87149 | 19.38175 | 22.24624 | 18.18437 | 18.67758 | 18.20776 | 27.19003 | 28.58022 |
| gene-AT4C  | 0.766307 | 0.827475 | 0.793711 | 0.511499 | 0.435529 | 0.30039  | 1.027249 | 1.065459 |
| gene-AT3C  | 9.835813 | 9.819056 | 9.330873 | 10.50421 | 11.22977 | 10.28485 | 3.52665  | 3.685696 |
| gene-AT3C  | 4.719335 | 3.86613  | 4.54709  | 5.503216 | 5.353696 | 5.605842 | 2.912492 | 3.252778 |
| gene-AT1C  | 0.791388 | 0.96771  | 0.976239 | 1.613822 | 1.388176 | 1.488841 | 0.563839 | 0.557476 |
| gene-AT3C  | 262.5054 | 245.3798 | 241.3856 | 225.8493 | 229.724  | 213.9187 | 457.3905 | 485.6896 |
| gene-AT5C  | 7.658209 | 8.033532 | 8.015385 | 15.60385 | 16.86783 | 14.18126 | 6.100278 | 5.245433 |
| gene-AT3C  | 113.5153 | 97.95041 | 113.5237 | 53.92996 | 45.38266 | 42.63819 | 16.17608 | 14.36399 |
| gene-AT3C  | 0.06155  | 0        | 0.05719  | 0.716735 | 0.639325 | 0.62116  | 0        | 0.081861 |
| gene-AT4C  | 1.110339 | 1.174713 | 1.513551 | 1.760828 | 1.76301  | 1.385082 | 0.998986 | 1.192532 |
| gene-AT3C  | 3.811161 | 4.076052 | 4.264723 | 5.223208 | 5.581198 | 5.202318 | 5.814192 | 6.223212 |
| gene-AT5C  | 6.320192 | 5.788444 | 6.382693 | 8.957422 | 8.535647 | 8.551252 | 2.518892 | 3.882741 |
| gene-AT1C  | 43.85691 | 41.10362 | 43.95076 | 16.84539 | 18.39704 | 15.66192 | 105.8527 | 109.1415 |
| gene-AT5C  | 4.382199 | 3.38885  | 3.711192 | 6.018508 | 6.876523 | 5.061971 | 2.762747 | 3.802184 |
| gene-AT5C  | 14.27853 | 15.75117 | 16.04442 | 10.51948 | 9.052373 | 9.442638 | 16.04295 | 16.98345 |
| gene-AT5C  | 29.99629 | 28.43113 | 32.90672 | 42.82228 | 41.86101 | 43.01484 | 15.96846 | 15.82487 |
| gene-AT4C  | 0.70917  | 0.659392 | 1.080599 | 2.446986 | 2.88527  | 2.866765 | 0.090707 | 0.187217 |
| gene-AT4C  | 61.81436 | 61.13346 | 62.20989 | 45.18918 | 49.21345 | 46.64084 | 79.72952 | 80.77287 |
| gene-AT5C  | 69.38446 | 66.55853 | 64.95529 | 57.50999 | 56.96378 | 59.15954 | 84.97816 | 90.37273 |
| gene-AT5C  | 8.335743 | 7.750383 | 8.189694 | 4.924342 | 5.205787 | 5.087581 | 8.252791 | 8.095343 |
| gene-AT3C  | 0.737984 | 0.429835 | 0.811525 | 1.443329 | 1.000932 | 1.039663 | 0.144054 | 0.359836 |
| gene-AT5C  | 6.421296 | 6.391999 | 4.990338 | 7.151925 | 8.829621 | 8.136177 | 11.75639 | 14.43446 |
| gene-AT5C  | 153.5692 | 155.1602 | 159.8389 | 292.8104 | 296.5269 | 287.2906 | 142.0722 | 151.9441 |
| gene-AT4C  | 4.490443 | 4.022786 | 4.629922 | 5.208052 | 4.542405 | 5.260238 | 6.907361 | 7.169721 |
| gene-AT5C  | 4.18746  | 4.409419 | 3.886872 | 71.64204 | 69.87016 | 66.78571 | 0.194977 | 0.234755 |
| gene-AT4C  | 2.381579 | 3.299538 | 1.957358 | 2.482326 | 2.852151 | 2.792981 | 3.184249 | 3.639323 |
| gene-AT1C  | 2.690403 | 2.712208 | 3.333799 | 2.596224 | 2.891794 | 2.348409 | 1.31378  | 1.141618 |
| gene-AT5C  | 204.0476 | 198.3675 | 188.6646 | 125.1307 | 128.2683 | 123.5866 | 369.605  | 369.8045 |
| gene-AT4C  | 2.18034  | 2.253022 | 1.892673 | 1.344516 | 2.003984 | 1.444032 | 2.475424 | 2.012559 |
| gene-AT3C  | 23.24611 | 22.27305 | 20.81432 | 16.88502 | 16.04792 | 17.39448 | 32.55468 | 35.06678 |
| gene-AT3C  | 0.546264 | 0.359285 | 0.504005 | 1.251248 | 0.44431  | 0.439783 | 0.4241   | 0.333656 |
| gene-AT4C  | 10.03377 | 9.837114 | 11.00651 | 7.316778 | 5.73848  | 6.656811 | 3.306915 | 4.618854 |
| gene-AT5C  | 77.57243 | 77.22727 | 79.08797 | 69.03257 | 61.95903 | 64.8368  | 134.5374 | 134.1134 |
| gene-AT5C  | 4.266439 | 4.911592 | 5.346128 | 5.435239 | 5.288237 | 5.337095 | 6.513647 | 7.615877 |
| gene-AT5C  | 4.684598 | 4.571018 | 4.806029 | 5.570158 | 6.885728 | 7.828035 | 4.890009 | 5.21123  |
| gene-AT5C  | 9.381759 | 7.261325 | 8.343823 | 3.534416 | 4.101245 | 3.490289 | 19.48232 | 20.45121 |
| gene-AT5C  | 41.21079 | 41.39355 | 39.46369 | 27.00895 | 31.02127 | 28.47395 | 46.49762 | 49.58206 |
| gene-AT2C  | 11.43575 | 10.92736 | 11.08952 | 12.42237 | 13.38822 | 11.93069 | 17.39964 | 17.08761 |
| gene-AT5C  | 13.9047  | 13.64145 | 13.86665 | 20.95069 | 18.72322 | 20.08641 | 8.870783 | 9.609345 |
| gene-AT1C  | 0.465984 | 0.141433 | 0.897504 | 0.61401  | 0.720352 | 0.52469  | 1.437733 | 1.179398 |
| gene-AT2C  | 1.184026 | 1.242494 | 1.064856 | 0.472736 | 1.137365 | 0.707424 | 1.543588 | 1.529177 |
| gene-AT5C  | 9.98949  | 9.968845 | 9.414311 | 5.303988 | 4.925616 | 5.579002 | 2.868681 | 3.320321 |
| gene-AT2C  | 0.188277 | 0.1744   | 0        | 0.219771 | 0.281715 | 0.248379 | 0.603333 | 0.228059 |
| gene-AT3C  | 88.38028 | 86.54524 | 87.94827 | 100.2808 | 101.0624 | 99.84742 | 135.1782 | 139.0189 |
| Arabidopsi | 0.235629 | 0.303215 | 0.371548 | 0.728055 | 0.346349 | 0.6399   | 0.04784  | 0        |
| gene-AT2C  | 129.1263 | 129.4462 | 128.703  | 441.0915 | 456.4331 | 454.8149 | 84.6523  | 89.84227 |
| gene-AT2C  | 3.760336 | 4.132829 | 4.241612 | 3.545157 | 3.113547 | 2.852206 | 7.349882 | 8.545597 |
| gene-AT2C  | 0.752604 | 0.427379 | 0.376064 | 0.355295 | 0.155267 | 0.522055 | 0        | 0        |
| gene-AT2C  | 2.248287 | 1.846158 | 1.867386 | 2.95043  | 2.187392 | 2.701526 | 0        | 0.279138 |
| gene-AT2C  | 12.12104 | 14.67096 | 14.41714 | 20.15681 | 20.87016 | 21.18428 | 9.421553 | 11.66538 |

|           |          |          |          |          |          |          |          |          |
|-----------|----------|----------|----------|----------|----------|----------|----------|----------|
| gene-AT5C | 1.074865 | 1.051102 | 0.991306 | 13.15971 | 14.83483 | 14.63646 | 0.710237 | 0.573922 |
| gene-AT5C | 38.04565 | 33.86436 | 39.24726 | 31.77602 | 31.81985 | 29.14881 | 49.75282 | 46.99477 |
| gene-AT1C | 0.767792 | 0.801286 | 0.499932 | 0.04712  | 0        | 0.067116 | 0.622794 | 0.721394 |
| gene-AT1C | 0.661982 | 0.672644 | 0.675998 | 0.036207 | 0.075768 | 0.040009 | 0.56438  | 0.780817 |
| gene-AT5C | 27.28478 | 29.36695 | 24.0788  | 15.69881 | 14.98123 | 14.4404  | 27.2312  | 29.70486 |
| gene-AT1C | 0.853504 | 0.799448 | 1.174776 | 0.870847 | 0.696279 | 0.728925 | 0.089153 | 0.107737 |
| gene-AT1C | 4.249868 | 4.640097 | 5.45224  | 7.625299 | 7.556797 | 7.589987 | 1.398251 | 1.424724 |
| gene-AT3C | 2.230108 | 2.875651 | 2.670353 | 1.057593 | 1.099003 | 0.5907   | 11.24091 | 12.02135 |
| gene-AT4C | 12.93511 | 11.60585 | 13.79747 | 11.37512 | 11.33953 | 10.74861 | 14.24008 | 13.70662 |
| gene-AT1C | 21.8287  | 19.42899 | 19.13488 | 13.4683  | 13.84716 | 13.27477 | 3.66353  | 4.205105 |
| gene-AT5C | 3.409072 | 4.368397 | 4.826219 | 1.742662 | 1.770684 | 2.091152 | 0.67312  | 0.723813 |
| gene-AT1C | 32.44882 | 31.12124 | 34.23993 | 27.21669 | 28.34401 | 28.28532 | 48.04476 | 51.07219 |
| gene-AT1C | 30.53727 | 29.22732 | 29.39166 | 19.76846 | 17.88006 | 20.06736 | 52.19638 | 56.44174 |
| gene-AT2C | 26.74099 | 27.57254 | 27.36917 | 40.47828 | 39.07771 | 38.29482 | 16.21131 | 16.72898 |
| gene-AT5C | 3.126329 | 2.262816 | 2.607061 | 4.32407  | 3.343042 | 3.601609 | 5.220044 | 4.354308 |
| gene-AT1C | 0.644489 | 0.686684 | 0.504315 | 0.635087 | 0.275961 | 0.64262  | 0.606712 | 0.278447 |
| gene-AT1C | 29.89934 | 30.27196 | 31.38894 | 21.0346  | 24.73133 | 24.11525 | 29.707   | 30.8742  |
| gene-AT1C | 1.763548 | 1.723803 | 1.000791 | 2.436404 | 1.686307 | 1.606557 | 1.774017 | 1.578003 |
| gene-AT5C | 18.46566 | 18.12848 | 18.32559 | 15.8274  | 15.72715 | 15.57393 | 29.96755 | 27.25369 |
| gene-AT1C | 6.009482 | 6.084607 | 6.303783 | 5.620996 | 4.255386 | 6.172173 | 1.494732 | 1.806581 |
| gene-AT3C | 9.553016 | 10.69603 | 11.51728 | 7.156961 | 6.487495 | 5.519311 | 10.44843 | 11.82449 |
| gene-AT2C | 5.04725  | 4.358522 | 4.500123 | 4.771985 | 4.752744 | 4.566573 | 3.976473 | 5.03618  |
| gene-AT4C | 92.47494 | 96.53723 | 96.06323 | 43.40598 | 42.88434 | 42.78987 | 49.97166 | 55.73548 |
| gene-AT3C | 0.559809 | 0.328637 | 0.532309 | 1.375627 | 1.527736 | 1.715908 | 0.344607 | 0.544746 |
| gene-AT1C | 63.02263 | 62.99824 | 63.56812 | 30.62925 | 35.01854 | 30.31486 | 149.7979 | 158.4793 |
| gene-AT3C | 0.190961 | 0.378954 | 0.140816 | 0.110706 | 0.519771 | 0.140488 | 1.042524 | 1.089711 |
| gene-AT1C | 78.87586 | 83.84956 | 77.4774  | 191.0663 | 197.4148 | 218.3276 | 86.87151 | 63.37895 |
| gene-AT1C | 74.13497 | 75.06185 | 74.18957 | 132.5238 | 133.0958 | 130.1434 | 43.73903 | 45.40359 |
| gene-AT3C | 15.50868 | 17.29421 | 16.78267 | 13.59097 | 14.56961 | 16.71247 | 9.201571 | 10.04713 |
| gene-AT1C | 2.375289 | 2.372774 | 2.629878 | 2.108102 | 1.524201 | 1.828609 | 1.177898 | 1.178532 |
| gene-AT3C | 12.9734  | 12.14837 | 12.74363 | 7.149828 | 6.387373 | 8.034219 | 3.992613 | 4.377031 |
| gene-AT2C | 1.178287 | 1.039694 | 1.236252 | 1.486177 | 1.453503 | 1.774238 | 0.509641 | 0.50856  |
| gene-AT5C | 14.12852 | 13.93272 | 14.1643  | 6.006891 | 6.138624 | 6.980396 | 7.644854 | 7.668496 |
| gene-AT1C | 1.45162  | 1.955313 | 1.749376 | 3.044583 | 3.884682 | 4.449139 | 1.884798 | 1.885517 |
| gene-AT3C | 2.447119 | 3.178936 | 3.529109 | 4.695131 | 4.494581 | 3.866882 | 5.497588 | 6.587827 |
| gene-AT1C | 13.60559 | 11.56881 | 13.15951 | 12.39452 | 13.63998 | 11.85328 | 1.737461 | 1.823138 |
| gene-AT2C | 63.43192 | 59.82412 | 64.3612  | 69.29596 | 70.9466  | 66.81332 | 87.15258 | 91.62279 |
| gene-AT2C | 15.47977 | 13.62425 | 14.11952 | 14.41084 | 12.61238 | 12.47307 | 6.878797 | 6.485353 |
| gene-AT1C | 3.65964  | 3.860323 | 3.8585   | 1.572162 | 1.170694 | 1.610271 | 0.509279 | 0.38176  |
| gene-AT5C | 3.827864 | 2.590414 | 3.052576 | 8.545911 | 9.883094 | 9.218322 | 0.592108 | 1.225627 |
| gene-AT4C | 81.19072 | 78.07729 | 77.511   | 163.6141 | 159.2847 | 158.1367 | 62.9036  | 62.6026  |
| gene-AT5C | 0.774965 | 0.841771 | 0.528867 | 0.571466 | 0.413796 | 0.366257 | 1.470152 | 1.493775 |
| gene-AT2C | 0.571113 | 0.638943 | 0.591332 | 0.69217  | 0.826029 | 0.69406  | 1.318948 | 1.545445 |
| gene-AT5C | 0.391646 | 0.368703 | 0.745998 | 1.780607 | 1.189423 | 2.243845 | 0.304279 | 0.876285 |
| gene-AT1C | 1.297557 | 0.564284 | 0.2683   | 1.116189 | 0.932288 | 1.008448 | 0.538646 | 0.548625 |
| gene-AT1C | 44.19887 | 41.72876 | 45.59218 | 60.72335 | 60.8494  | 61.08231 | 20.40183 | 19.9589  |
| gene-AT5C | 14.40528 | 13.75632 | 14.67951 | 38.18117 | 42.03864 | 38.44667 | 15.58403 | 15.65024 |
| gene-AT2C | 3.958604 | 4.830575 | 3.012871 | 4.365487 | 5.141513 | 6.762936 | 1.766978 | 2.438364 |
| gene-AT2C | 36.82448 | 37.47938 | 34.88747 | 27.90944 | 29.53928 | 27.78879 | 65.07132 | 73.73331 |
| gene-AT1C | 1.377427 | 1.169377 | 1.307054 | 1.326434 | 1.462201 | 1.423356 | 0.631601 | 0.466509 |
| gene-AT5C | 8.753743 | 8.793842 | 8.922344 | 5.432995 | 5.390934 | 5.848027 | 3.046282 | 2.494885 |



|            |          |          |          |          |          |          |          |          |
|------------|----------|----------|----------|----------|----------|----------|----------|----------|
| gene-AT1C  | 84.03326 | 80.40747 | 78.11348 | 70.70731 | 72.3965  | 69.78092 | 109.4131 | 116.9373 |
| gene-AT2C  | 6.621714 | 6.789519 | 6.739376 | 16.95192 | 17.17127 | 16.5803  | 1.100549 | 1.057253 |
| gene-AT3C  | 30.73159 | 29.68278 | 33.00167 | 119.6537 | 117.3691 | 118.0813 | 50.7987  | 51.19976 |
| Arabidopsi | 0.014717 | 0.033625 | 0.139813 | 1.966271 | 1.619704 | 1.666079 | 0.501632 | 0.192591 |
| Arabidopsi | 21.72406 | 30.39248 | 29.66898 | 39.04225 | 40.43876 | 48.59887 | 1044.689 | 436.4725 |
| gene-AT2C  | 1.830897 | 1.450603 | 2.156163 | 1.477193 | 1.213993 | 1.139392 | 1.485618 | 2.478257 |
| gene-AT3C  | 29.03625 | 26.53078 | 30.96589 | 48.48583 | 46.81666 | 48.71695 | 16.24529 | 14.89669 |
| gene-AT5C  | 14.24796 | 15.29261 | 13.97014 | 19.86114 | 19.99233 | 21.27129 | 3.79527  | 4.173225 |
| gene-AT5C  | 1.358978 | 1.543035 | 1.211071 | 1.209573 | 1.070711 | 1.264672 | 0.319838 | 0.49539  |
| gene-AT4C  | 39.36105 | 36.6181  | 37.96895 | 23.90913 | 29.43472 | 27.57466 | 56.39216 | 58.97361 |
| gene-AT5C  | 0.964481 | 0.76679  | 1.110059 | 0.371486 | 0.412958 | 0.295627 | 0.83275  | 0.723774 |
| gene-AT1C  | 21.54051 | 19.23891 | 20.58825 | 9.585784 | 10.1145  | 9.928943 | 31.15204 | 32.33913 |
| gene-AT2C  | 15.11295 | 15.7727  | 14.73717 | 5.107964 | 5.203915 | 5.747651 | 5.351045 | 5.143027 |
| gene-AT1C  | 0.359938 | 0.334832 | 0.268556 | 0.351815 | 0.699053 | 0.429705 | 0.997303 | 0.6596   |
| gene-AT3C  | 16.27821 | 15.98928 | 17.73605 | 8.673481 | 9.949047 | 8.946936 | 29.51062 | 28.84789 |
| gene-AT5C  | 4.303823 | 3.949009 | 3.243094 | 4.320517 | 4.979145 | 5.189458 | 2.411536 | 2.451809 |
| gene-AT2C  | 0.15106  | 0.141697 | 0.145129 | 0.339211 | 0.207362 | 0.206158 | 0.143446 | 0.119242 |
| gene-AT3C  | 4.783698 | 5.257186 | 5.263124 | 0.373195 | 0.533101 | 0.722477 | 0.343391 | 0.667765 |
| gene-AT5C  | 1.035661 | 1.52948  | 2.203664 | 1.90665  | 1.211059 | 1.370032 | 2.345445 | 2.321915 |
| gene-AT4C  | 160.5751 | 164.8539 | 168.0627 | 133.519  | 137.5646 | 133.7507 | 106.2992 | 104.9897 |
| gene-AT1C  | 9.438608 | 8.910025 | 10.75732 | 9.945207 | 9.010909 | 7.573483 | 3.279365 | 3.034858 |
| gene-AT2C  | 21.66027 | 18.14256 | 20.3902  | 19.97049 | 18.90859 | 21.57754 | 25.61126 | 27.80578 |
| gene-AT5C  | 0.27096  | 0.345395 | 0.111667 | 0.929686 | 1.200152 | 1.033974 | 0.192551 | 0.420143 |
| gene-AT2C  | 30.71867 | 29.23586 | 28.53267 | 22.65705 | 25.22872 | 25.11    | 41.48698 | 45.48203 |
| gene-AT3C  | 0.126742 | 0.213895 | 0.053236 | 0.609757 | 0.656033 | 0.496379 | 0.084283 | 0.159776 |
| gene-AT1C  | 1.856925 | 1.345838 | 1.730805 | 1.434102 | 1.074026 | 1.498887 | 0.744669 | 0.594782 |
| gene-AT3C  | 9.457758 | 8.744254 | 9.145138 | 5.313258 | 5.152111 | 4.897681 | 12.78118 | 13.7528  |
| gene-AT1C  | 29.29104 | 30.49027 | 30.00791 | 18.03854 | 18.18326 | 16.66032 | 26.18235 | 28.28988 |
| gene-AT4C  | 2.179316 | 1.745958 | 2.267141 | 1.868492 | 1.284638 | 1.991409 | 1.054479 | 0.674974 |
| gene-AT1C  | 17.42953 | 15.53145 | 16.74065 | 16.31112 | 17.2331  | 16.66406 | 6.218987 | 6.390543 |
| gene-AT3C  | 15.10899 | 14.33686 | 14.61522 | 9.792005 | 8.014173 | 6.997421 | 0.816282 | 1.762871 |
| gene-AT4C  | 22.09775 | 23.81889 | 22.45842 | 4.363193 | 5.091276 | 5.269419 | 16.38261 | 16.53961 |
| gene-AT1C  | 18.9974  | 14.73469 | 15.66944 | 17.73865 | 16.85508 | 17.29343 | 6.776943 | 6.287691 |
| gene-AT1C  | 20.55353 | 19.609   | 21.64048 | 15.49909 | 15.37778 | 14.84821 | 30.73452 | 29.18773 |
| gene-AT1C  | 2.739391 | 2.67116  | 2.962914 | 2.154074 | 2.636316 | 2.185301 | 3.454593 | 4.331189 |
| gene-AT2C  | 24.21149 | 26.22818 | 27.51241 | 17.76886 | 17.2716  | 18.23528 | 31.09748 | 30.35062 |
| gene-AT5C  | 21.94087 | 23.91708 | 23.46167 | 10.62534 | 8.986389 | 9.520556 | 47.10343 | 48.43615 |
| gene-AT1C  | 12.42381 | 13.14019 | 13.95218 | 9.522991 | 8.905421 | 8.260535 | 18.20812 | 19.50005 |
| gene-AT1C  | 18.68695 | 19.39532 | 18.22151 | 41.98974 | 42.36362 | 38.72419 | 10.07449 | 12.27647 |
| gene-AT2C  | 2.49303  | 3.261821 | 2.248505 | 0.635146 | 0.524292 | 0.582876 | 13.4495  | 9.648785 |
| gene-AT5C  | 1.908723 | 2.037381 | 1.659311 | 0.966716 | 1.138281 | 1.181386 | 0.687857 | 0.518416 |
| gene-AT4C  | 0.498218 | 0.740616 | 0.455407 | 0.576237 | 1.074451 | 0.743604 | 1.929859 | 2.119912 |
| gene-AT5C  | 3.764087 | 2.219819 | 3.128408 | 1.279223 | 1.295318 | 1.192596 | 7.560661 | 6.70905  |
| gene-AT3C  | 8.275178 | 11.78614 | 8.520212 | 8.822973 | 10.60771 | 11.20369 | 3.464533 | 3.220567 |
| gene-AT5C  | 28.43474 | 29.202   | 31.40847 | 18.68127 | 18.3379  | 17.90138 | 29.9658  | 31.02258 |
| gene-AT4C  | 6.485075 | 7.873141 | 6.83079  | 6.016547 | 5.758019 | 6.651112 | 2.564211 | 2.789398 |
| gene-AT4C  | 14.6957  | 14.05391 | 14.66396 | 16.66201 | 17.3499  | 17.44425 | 13.52292 | 13.11353 |
| gene-AT3C  | 81.70292 | 78.50166 | 80.16824 | 48.26725 | 49.78952 | 46.8712  | 153.2573 | 137.6442 |
| gene-AT4C  | 4.681745 | 4.665134 | 4.158191 | 4.388668 | 3.787863 | 3.791296 | 2.615768 | 2.652667 |
| gene-AT1C  | 23.89683 | 25.04731 | 26.91568 | 22.87124 | 21.30165 | 20.26188 | 24.83131 | 25.21243 |
| gene-AT5C  | 134.6605 | 128.2259 | 135.526  | 124.6294 | 129.4037 | 127.4437 | 58.06727 | 63.74469 |

|           |          |          |          |          |          |          |          |          |
|-----------|----------|----------|----------|----------|----------|----------|----------|----------|
| gene-AT3C | 2.265489 | 2.944311 | 2.352115 | 26.88159 | 24.44259 | 25.38209 | 2.076131 | 2.263015 |
| gene-AT5C | 6.589466 | 5.23985  | 5.415485 | 6.016622 | 5.378944 | 6.575787 | 10.80825 | 11.12833 |
| gene-AT5C | 0.670432 | 0.751136 | 0.297966 | 0.083369 | 0.270025 | 0.318687 | 1.580091 | 1.081461 |
| gene-AT4C | 11.37013 | 10.48432 | 10.65667 | 8.284024 | 9.083714 | 9.686168 | 1.875716 | 2.299416 |
| gene-AT2C | 19.28021 | 16.09551 | 17.53611 | 28.24549 | 25.20362 | 25.46472 | 14.43638 | 15.06596 |
| gene-AT2C | 4.657257 | 3.761731 | 4.213537 | 1.399975 | 2.252357 | 1.515952 | 4.489209 | 3.788018 |
| gene-AT4C | 14.146   | 10.81927 | 9.670003 | 9.167398 | 8.587161 | 8.510455 | 13.50956 | 13.26976 |
| gene-AT4C | 16.06678 | 15.88058 | 17.45563 | 17.48654 | 17.46321 | 19.05255 | 6.024008 | 5.946055 |
| gene-AT2C | 35.03596 | 35.24049 | 39.07093 | 50.93728 | 46.3834  | 46.47455 | 16.5354  | 18.15392 |
| gene-AT4C | 48.98902 | 47.46475 | 48.18953 | 45.15601 | 44.587   | 44.94818 | 17.06331 | 18.11108 |
| gene-AT5C | 19.27961 | 21.03482 | 18.4709  | 12.81534 | 13.44517 | 11.39585 | 64.27028 | 59.28513 |
| gene-AT5C | 2.049658 | 2.296863 | 1.959744 | 1.851233 | 2.311754 | 2.193763 | 2.307229 | 2.447314 |
| gene-AT2C | 10.92662 | 11.59834 | 11.22947 | 1.889125 | 3.291902 | 1.659841 | 18.31508 | 17.83719 |
| gene-AT3C | 22.52125 | 21.45332 | 20.82155 | 39.53606 | 39.82944 | 40.02963 | 14.47966 | 14.68683 |
| gene-AT2C | 44.90479 | 49.43408 | 44.62519 | 20.69098 | 19.40984 | 19.28333 | 14.61664 | 15.90469 |
| gene-AT2C | 12.4107  | 14.03269 | 11.8181  | 16.02718 | 18.11714 | 16.59059 | 2.412384 | 1.918605 |
| gene-AT1C | 1.048465 | 0.642543 | 0.575591 | 0.885744 | 1.411525 | 0.68074  | 0.624147 | 0.4069   |
| gene-AT1C | 24.8247  | 26.54401 | 25.97748 | 42.37083 | 39.82062 | 43.39953 | 15.068   | 14.61156 |
| gene-AT1C | 2.310642 | 1.932392 | 1.397399 | 0.762977 | 0.660627 | 1.013467 | 0.724069 | 1.487541 |
| gene-AT2C | 3.23552  | 3.197039 | 2.628947 | 4.929912 | 5.079859 | 3.992283 | 0.88147  | 1.529194 |
| gene-AT3C | 22.31614 | 20.15868 | 19.90655 | 21.42918 | 21.75175 | 19.57452 | 8.649098 | 7.805974 |
| gene-AT3C | 6.565254 | 6.313624 | 5.388688 | 5.262277 | 4.616473 | 5.565239 | 9.151206 | 11.46999 |
| gene-AT1C | 97.96365 | 102.4884 | 102.6139 | 63.94379 | 64.65856 | 66.32794 | 44.76534 | 45.50189 |
| gene-AT1C | 4.726694 | 4.514722 | 4.996632 | 4.89495  | 5.206197 | 4.65319  | 6.875194 | 7.759729 |
| gene-AT4C | 6.984163 | 7.696763 | 7.755931 | 4.253234 | 4.453235 | 3.965854 | 0.639395 | 0.936348 |
| gene-AT1C | 7.008492 | 7.915453 | 7.37254  | 4.053385 | 5.303416 | 3.776737 | 1.291579 | 1.494327 |
| gene-AT1C | 7.997677 | 7.901701 | 8.652796 | 1.873413 | 3.043241 | 1.863453 | 7.395092 | 8.243022 |
| gene-AT2C | 3.411715 | 3.764273 | 3.256643 | 6.034633 | 6.479447 | 7.51828  | 2.393779 | 3.042415 |
| gene-AT5C | 227.8426 | 227.9101 | 228.6399 | 88.69582 | 89.12647 | 88.5128  | 32.9299  | 34.71314 |
| gene-AT1C | 4.510909 | 5.215812 | 6.074357 | 6.720931 | 5.240088 | 7.457435 | 5.30674  | 6.806537 |
| gene-AT4C | 8.347305 | 8.302976 | 8.128995 | 7.015098 | 6.05302  | 6.660069 | 26.08658 | 24.29072 |
| gene-AT1C | 28.90997 | 24.38377 | 26.26149 | 29.15663 | 28.52193 | 26.9085  | 26.36227 | 28.92193 |
| gene-AT1C | 8.622958 | 7.43314  | 8.29093  | 23.36593 | 21.6029  | 22.12561 | 9.731037 | 8.043273 |
| gene-AT1C | 0.199013 | 0.282174 | 0.582337 | 0.165264 | 0.402327 | 0.289349 | 0.223573 | 0.186351 |
| gene-AT3C | 5.477544 | 6.085099 | 5.302805 | 5.346809 | 5.334524 | 4.750704 | 2.475335 | 2.056251 |
| gene-AT3C | 2.583545 | 3.029348 | 2.90467  | 21.39364 | 20.06891 | 20.94611 | 5.527944 | 5.207139 |
| gene-AT1C | 1.658109 | 1.312958 | 1.803774 | 0.669653 | 0.949399 | 0.670006 | 0.378123 | 0.382996 |
| gene-AT4C | 6.165088 | 6.416362 | 6.476067 | 18.3543  | 18.35307 | 16.17045 | 10.21002 | 12.26988 |
| gene-AT5C | 1.75213  | 1.898629 | 1.673381 | 1.360889 | 0.571934 | 0.586468 | 0.550833 | 0.485999 |
| gene-AT2C | 46.81733 | 46.85794 | 43.18894 | 13.8697  | 12.56873 | 15.02655 | 27.60121 | 30.54776 |
| gene-AT3C | 0        | 0        | 0        | 1.256937 | 1.75003  | 1.36532  | 0.777811 | 0.47069  |
| gene-AT3C | 3.329137 | 2.784313 | 2.594548 | 1.307579 | 1.276847 | 0.829818 | 1.943709 | 2.249405 |
| gene-AT1C | 20.24325 | 19.80528 | 21.85569 | 19.4943  | 19.80693 | 19.71596 | 18.38784 | 19.75732 |
| gene-AT5C | 7.043722 | 7.350916 | 7.712902 | 14.4043  | 15.80999 | 14.1888  | 3.099063 | 2.278659 |
| gene-AT2C | 0.384253 | 0        | 0        | 0.492084 | 0.440222 | 0.212479 | 0        | 0.048685 |
| gene-AT5C | 68.85509 | 65.92323 | 67.74635 | 15.02027 | 15.98363 | 16.22482 | 12.94426 | 16.28218 |
| gene-AT3C | 31.61212 | 31.15428 | 33.35951 | 62.23104 | 63.95883 | 63.82496 | 32.20838 | 36.80209 |
| gene-AT1C | 0.409448 | 0.476294 | 0.31588  | 1.689481 | 0.851687 | 1.291068 | 0.570851 | 0.528295 |
| gene-AT4C | 1.236035 | 1.294509 | 0.987651 | 4.187447 | 3.310302 | 3.52087  | 2.003567 | 2.483101 |
| gene-AT3C | 2.344692 | 3.295375 | 2.613726 | 4.277285 | 3.61498  | 4.248058 | 0.66782  | 1.079161 |
| gene-AT5C | 3.379596 | 2.927358 | 3.528681 | 9.606265 | 9.018319 | 8.652333 | 3.194377 | 2.867097 |

|           |          |          |          |          |          |          |          |          |
|-----------|----------|----------|----------|----------|----------|----------|----------|----------|
| gene-AT5C | 23.15685 | 19.50804 | 22.27757 | 23.55981 | 23.64    | 23.7844  | 20.66057 | 18.72795 |
| gene-AT4C | 19.40846 | 18.53305 | 19.03734 | 8.0055   | 7.894943 | 8.254216 | 6.419947 | 7.869248 |
| gene-AT3C | 27.66721 | 27.22244 | 30.68784 | 27.68757 | 24.85904 | 22.47697 | 14.55796 | 19.29599 |
| gene-AT1C | 6.219999 | 6.619647 | 5.969872 | 8.995549 | 9.675104 | 9.297701 | 4.728    | 4.455769 |
| gene-AT5C | 0.979578 | 0.652209 | 0.831647 | 0.399729 | 0.95454  | 0.677577 | 1.554869 | 1.810334 |
| gene-AT1C | 11.44162 | 10.5163  | 10.4725  | 12.06811 | 12.63849 | 12.85715 | 7.28792  | 8.067949 |
| gene-AT5C | 13.53005 | 12.36445 | 12.34857 | 10.4031  | 10.70414 | 10.4781  | 1.72355  | 1.550705 |
| gene-AT5C | 6.945761 | 5.83286  | 5.98875  | 4.575908 | 4.823384 | 4.617195 | 2.033537 | 2.320152 |
| gene-AT1C | 0.367072 | 0.376266 | 0.524913 | 0.916596 | 0.416939 | 0.979086 | 1.216625 | 1.564024 |
| gene-AT5C | 26.96726 | 23.21445 | 28.54408 | 17.71179 | 18.48883 | 17.14378 | 40.89827 | 39.08991 |
| gene-AT1C | 52.75147 | 46.6281  | 50.05298 | 8.785285 | 10.25007 | 9.888741 | 5.463468 | 6.513276 |
| gene-AT2C | 5.65734  | 4.776315 | 4.92478  | 1.742713 | 2.124193 | 1.876268 | 1.72141  | 1.553295 |
| gene-AT2C | 9.216772 | 6.04836  | 9.21596  | 10.47524 | 11.43796 | 12.11384 | 4.761885 | 5.446683 |
| gene-AT5C | 27.18258 | 26.11678 | 27.48185 | 21.76499 | 21.30577 | 22.54574 | 38.57632 | 41.37971 |
| gene-AT3C | 1.331416 | 1.226198 | 1.166828 | 0.144425 | 0.271566 | 0.729511 | 2.050817 | 2.670533 |
| gene-AT2C | 1.228446 | 2.41304  | 1.432853 | 0.907185 | 0.610662 | 0.531852 | 3.961995 | 3.746333 |
| gene-AT3C | 16.15488 | 17.94823 | 16.66928 | 14.64804 | 14.76794 | 15.76464 | 8.985302 | 9.565912 |
| gene-AT1C | 2.674421 | 1.695342 | 2.192513 | 1.746973 | 2.252254 | 1.684246 | 3.144212 | 2.394578 |
| gene-AT5C | 3.080349 | 2.419528 | 2.83825  | 4.681654 | 4.663746 | 4.993911 | 2.070479 | 1.693813 |
| gene-AT4C | 22.64973 | 20.02205 | 21.51751 | 38.19815 | 36.38015 | 40.35057 | 15.21787 | 15.1278  |
| gene-AT4C | 1.29621  | 1.476783 | 0.920734 | 1.008906 | 0.70814  | 0.788807 | 2.694924 | 3.182244 |
| gene-AT1C | 116.9754 | 113.6957 | 113.7306 | 69.13826 | 72.5744  | 68.60656 | 214.6828 | 219.9505 |
| gene-AT2C | 1.12786  | 1.178251 | 1.165832 | 2.245951 | 2.094708 | 2.0051   | 1.043725 | 1.23984  |
| gene-AT3C | 2.227827 | 1.493897 | 1.462972 | 0.225426 | 0.173951 | 0.455365 | 0.732693 | 1.33542  |
| gene-AT4C | 1320.727 | 1348.286 | 1343.161 | 883.5767 | 864.8965 | 874.0438 | 523.6861 | 499.3153 |
| gene-AT1C | 1.806481 | 1.708268 | 1.372773 | 0.854424 | 0.737978 | 1.206947 | 1.489747 | 1.938452 |
| gene-AT5C | 5.220347 | 4.788924 | 6.053922 | 13.66758 | 12.85693 | 11.97    | 8.43502  | 9.157169 |
| gene-AT1C | 1.871335 | 1.763023 | 1.70972  | 2.228814 | 2.804753 | 3.181986 | 0.621665 | 1.267604 |
| gene-AT4C | 31.85672 | 30.91309 | 32.27905 | 29.19765 | 26.8192  | 28.67854 | 12.95937 | 13.05703 |
| gene-AT3C | 29.07757 | 30.20368 | 29.14564 | 21.74399 | 23.86956 | 20.99748 | 39.90969 | 41.50913 |
| gene-AT5C | 6.517049 | 7.66016  | 7.76287  | 10.45828 | 10.9367  | 11.32551 | 4.07376  | 4.085114 |
| gene-AT2C | 25.46017 | 24.68102 | 22.98395 | 24.54603 | 26.27124 | 23.8964  | 20.7977  | 22.48644 |
| gene-AT5C | 0.779859 | 0.606929 | 0.711772 | 1.944682 | 2.076788 | 1.547608 | 0.383946 | 0.390535 |
| gene-AT1C | 0.903786 | 0.753796 | 0.500878 | 2.3905   | 2.231973 | 2.105066 | 1.882934 | 0.89209  |
| gene-AT5C | 2.704441 | 2.097461 | 2.496715 | 3.394289 | 3.326798 | 2.544321 | 5.430758 | 5.022889 |
| gene-AT4C | 1.101336 | 1.339359 | 1.147374 | 1.108236 | 1.659715 | 1.141754 | 1.052103 | 1.585376 |
| gene-AT1C | 32.84257 | 30.64391 | 100.7118 | 27.67006 | 21.5833  | 36.06304 | 59.76522 | 38.7511  |
| gene-AT5C | 5.490094 | 5.336962 | 4.517494 | 3.539957 | 4.447984 | 3.988953 | 7.681769 | 8.433113 |
| gene-AT3C | 5.53817  | 6.542572 | 6.580337 | 7.180375 | 8.754794 | 6.648787 | 6.874162 | 7.602476 |
| gene-AT5C | 2.029471 | 2.518468 | 3.17358  | 0.375026 | 0.451201 | 0.144412 | 2.078589 | 2.849089 |
| gene-AT1C | 1.166607 | 1.105667 | 0.730363 | 0.864438 | 1.302336 | 0.436272 | 2.357904 | 2.475289 |
| gene-AT1C | 73.51283 | 69.78223 | 71.60851 | 36.68304 | 34.36496 | 37.28668 | 8.543853 | 7.499221 |
| gene-AT4C | 28.20155 | 28.54026 | 26.03911 | 14.52167 | 15.42965 | 15.17518 | 26.90598 | 24.56735 |
| gene-AT2C | 13.49508 | 13.04466 | 13.52457 | 32.63261 | 30.63009 | 30.52683 | 14.55861 | 15.81524 |
| gene-AT2C | 18.81481 | 18.97624 | 17.6213  | 15.32308 | 13.35909 | 15.19136 | 30.39005 | 31.85023 |
| gene-AT5C | 0.711577 | 0.987128 | 1.345763 | 1.837309 | 2.610209 | 2.695604 | 1.203902 | 0.920121 |
| gene-AT5C | 9.673854 | 8.05154  | 8.663379 | 5.315919 | 5.196069 | 5.372663 | 13.69849 | 13.51658 |
| gene-AT2C | 5.695871 | 6.2538   | 5.613875 | 2.790693 | 3.39267  | 2.6785   | 4.098647 | 4.209193 |
| gene-AT4C | 2.095129 | 1.974319 | 1.83695  | 1.969778 | 2.19362  | 1.342764 | 2.739603 | 3.168653 |
| gene-AT1C | 12.67774 | 11.76016 | 10.9989  | 6.758378 | 7.678    | 6.180687 | 10.5738  | 10.79639 |
| gene-AT3C | 1.454925 | 1.315521 | 1.30542  | 1.326648 | 1.312238 | 1.437619 | 2.305371 | 2.994938 |

|           |          |          |          |          |          |          |          |          |
|-----------|----------|----------|----------|----------|----------|----------|----------|----------|
| gene-AT2C | 157.2133 | 148.7789 | 147.5636 | 93.90923 | 97.65123 | 93.5719  | 279.3561 | 293.0796 |
| gene-AT5C | 130.2018 | 131.1711 | 129.406  | 250.5801 | 255.6185 | 248.7395 | 75.69669 | 76.30424 |
| gene-AT1C | 27.16101 | 24.09566 | 27.36025 | 28.91734 | 27.21777 | 29.01509 | 8.482755 | 8.945295 |
| gene-AT3C | 5.305909 | 4.174124 | 4.661034 | 6.009282 | 6.560764 | 6.510957 | 1.935346 | 2.389486 |
| gene-AT4C | 11.67222 | 10.35705 | 11.26087 | 11.59011 | 9.787208 | 11.76903 | 17.18026 | 17.00545 |
| gene-AT5C | 203.1943 | 200.8644 | 200.2847 | 57.37441 | 56.33858 | 55.35729 | 399.3639 | 392.9538 |
| gene-AT5C | 9.0749   | 8.660462 | 9.172421 | 10.3041  | 10.55849 | 9.728361 | 12.29978 | 13.25348 |
| gene-AT2C | 4.409939 | 6.121681 | 8.620055 | 10.83773 | 10.57458 | 8.739742 | 0        | 1.327305 |
| gene-AT1C | 53.96445 | 58.40583 | 52.24819 | 39.32241 | 43.38703 | 38.56045 | 67.5574  | 69.2247  |
| gene-AT3C | 542.7202 | 542.7064 | 547.5013 | 471.0257 | 468.2191 | 469.3896 | 194.3317 | 209.8414 |
| gene-AT4C | 4.758426 | 4.179798 | 3.72459  | 0.541623 | 0.66996  | 0.725395 | 0.26363  | 0.576657 |
| gene-AT1C | 30.64911 | 30.17978 | 30.50625 | 39.33887 | 39.68195 | 39.52031 | 13.49413 | 13.88871 |
| gene-AT3C | 438.1726 | 455.2553 | 447.9    | 275.796  | 264.9125 | 214.7768 | 910.9262 | 687.2453 |
| gene-AT4C | 4.243495 | 3.443746 | 4.403225 | 4.912798 | 3.898943 | 4.630031 | 2.184804 | 2.713655 |
| gene-AT3C | 43.18624 | 41.7458  | 42.7122  | 28.80477 | 28.60319 | 29.46062 | 13.28189 | 12.04161 |
| gene-AT3C | 1.763968 | 2.588914 | 2.337658 | 6.808689 | 6.342554 | 6.90406  | 1.383787 | 1.264983 |
| gene-AT3C | 1.875565 | 2.634893 | 1.934623 | 1.2816   | 1.646097 | 1.573901 | 2.87903  | 2.94411  |
| gene-AT3C | 4.52865  | 4.543634 | 4.175131 | 9.331415 | 9.464767 | 9.316366 | 2.754941 | 2.650869 |
| gene-AT1C | 37.07464 | 37.34796 | 37.41253 | 21.39303 | 22.63131 | 21.65832 | 14.77017 | 14.99752 |
| gene-AT5C | 8.558405 | 9.448853 | 7.571453 | 7.213728 | 7.27769  | 7.03354  | 3.50246  | 3.873407 |
| gene-AT5C | 1086.561 | 1069.582 | 1094.991 | 622.373  | 617.9731 | 623.0388 | 1669.905 | 1653.34  |
| gene-AT3C | 17.88497 | 18.86289 | 19.47966 | 11.02166 | 11.28017 | 10.88313 | 27.53635 | 26.84106 |
| gene-AT4C | 59.96769 | 56.73229 | 59.54502 | 9.07115  | 7.907019 | 7.023816 | 10.07392 | 9.147984 |
| gene-AT1C | 1.957991 | 1.970249 | 2.389467 | 2.3799   | 2.252867 | 1.963246 | 2.384479 | 3.023722 |
| gene-AT1C | 10.54356 | 9.367988 | 7.92924  | 4.918773 | 6.261713 | 5.739174 | 2.818834 | 2.098839 |
| gene-AT1C | 5.791687 | 4.662302 | 5.049546 | 6.362273 | 5.925702 | 5.887983 | 11.32109 | 9.566645 |
| gene-AT1C | 19.57367 | 21.60052 | 20.18581 | 15.46875 | 14.97093 | 15.54498 | 24.87512 | 25.80955 |
| gene-AT5C | 4.915575 | 4.471628 | 4.269873 | 2.425049 | 2.559865 | 2.831733 | 5.060803 | 5.165038 |
| gene-AT5C | 3.070591 | 2.662539 | 2.66108  | 4.199877 | 4.185733 | 4.136442 | 2.004795 | 2.309951 |
| gene-AT3C | 0.085687 | 0.112923 | 0.036427 | 0.206353 | 0.179121 | 0.054122 | 0.11904  | 0        |
| gene-AT1C | 14.18802 | 13.31746 | 14.44493 | 19.22685 | 20.97569 | 20.46535 | 11.58365 | 12.09439 |
| gene-AT3C | 3.377855 | 4.05801  | 3.78479  | 4.382645 | 5.092883 | 5.336068 | 6.893447 | 8.506915 |
| gene-AT3C | 5.0913   | 6.097374 | 5.966153 | 5.713484 | 5.721749 | 6.21091  | 17.28732 | 18.45865 |
| gene-AT4C | 2.645319 | 2.771226 | 2.280028 | 18.25153 | 18.45503 | 16.6338  | 1.117031 | 1.412508 |
| gene-AT2C | 7.028141 | 5.967798 | 6.897369 | 4.444478 | 4.522001 | 3.968834 | 7.900598 | 8.780717 |
| gene-AT5C | 6.808142 | 7.582566 | 7.526385 | 5.364176 | 5.52056  | 4.987416 | 3.403669 | 3.437874 |
| gene-AT4C | 5.826038 | 6.140105 | 8.996495 | 3.579744 | 2.681348 | 2.991424 | 1.746952 | 1.4633   |
| gene-AT4C | 1.237248 | 1.506246 | 1.373123 | 1.872026 | 1.276836 | 1.362121 | 0.468925 | 0.312203 |
| gene-AT3C | 0.961196 | 0.986391 | 0.871422 | 1.25408  | 0.857424 | 1.074531 | 0.424794 | 0.474218 |
| gene-AT4C | 0.550007 | 0.522497 | 0.694752 | 0.864838 | 0.986156 | 0.830523 | 2.546316 | 3.308249 |
| gene-AT1C | 6.126313 | 6.06558  | 6.208147 | 3.616395 | 3.32641  | 3.741025 | 6.151591 | 5.740012 |
| gene-AT3C | 6.161203 | 4.94336  | 6.159862 | 6.122993 | 5.937699 | 6.057327 | 6.341884 | 6.346823 |
| gene-AT1C | 48.23455 | 45.87579 | 42.09423 | 46.29518 | 44.91098 | 47.6222  | 20.69673 | 20.03013 |
| gene-AT1C | 0.265288 | 0        | 0.4055   | 2.493335 | 1.696247 | 1.595415 | 2.6387   | 2.909652 |
| gene-AT2C | 3.226396 | 2.666185 | 3.553709 | 5.785142 | 5.425257 | 6.006624 | 1.584334 | 1.683414 |
| gene-AT3C | 23.75414 | 24.39572 | 23.68798 | 19.03564 | 17.95201 | 18.4127  | 7.014448 | 7.300025 |
| gene-AT1C | 0.313304 | 0.501741 | 0.71596  | 1.546192 | 2.118519 | 0.96483  | 1.153973 | 1.307512 |
| gene-AT1C | 0.507215 | 0.777283 | 0.879851 | 0.361557 | 0.178013 | 0.496054 | 1.70665  | 1.892795 |
| gene-AT5C | 87.09399 | 82.92255 | 81.90299 | 71.07468 | 70.27119 | 69.26645 | 49.19588 | 52.04203 |
| gene-AT3C | 2.708621 | 3.485792 | 2.406877 | 4.228577 | 4.305235 | 3.761482 | 2.49358  | 2.727709 |
| gene-AT5C | 4.080454 | 2.761684 | 3.190687 | 7.187894 | 8.152166 | 6.646646 | 1.923639 | 2.678929 |

|           |          |          |          |          |          |          |          |          |
|-----------|----------|----------|----------|----------|----------|----------|----------|----------|
| gene-AT2C | 24.1204  | 22.58264 | 22.39472 | 53.86554 | 51.48333 | 55.08862 | 17.76522 | 15.28386 |
| gene-AT1C | 2.393501 | 2.766554 | 1.937592 | 4.916764 | 4.709265 | 4.905707 | 2.665841 | 3.328613 |
| gene-AT2C | 7.086812 | 7.565368 | 6.781573 | 14.12391 | 13.49578 | 13.57961 | 4.44742  | 3.642011 |
| gene-AT1C | 36.96914 | 39.39341 | 38.65323 | 28.8748  | 28.30631 | 27.69055 | 54.36743 | 56.83028 |
| gene-AT5C | 8.511628 | 8.768439 | 9.434788 | 9.479974 | 9.406713 | 8.437562 | 5.024626 | 4.946486 |
| gene-AT5C | 6.210257 | 6.180522 | 5.511147 | 4.056509 | 4.866839 | 4.594153 | 0.965935 | 1.503452 |
| gene-AT1C | 17.55156 | 16.09178 | 18.64077 | 14.82856 | 14.39432 | 15.21564 | 22.83342 | 21.86578 |
| gene-AT2C | 29.78074 | 29.11088 | 25.36394 | 26.40319 | 24.71479 | 25.20549 | 49.41032 | 49.6496  |
| gene-AT2C | 15.92632 | 17.29891 | 18.20413 | 13.53099 | 14.05325 | 13.21012 | 22.81298 | 23.16545 |
| gene-AT2C | 33.3457  | 29.83934 | 29.89291 | 31.3821  | 30.48208 | 28.72457 | 48.37564 | 53.28932 |
| gene-AT1C | 22.05949 | 19.257   | 20.87072 | 15.54675 | 16.28783 | 16.79876 | 22.9708  | 23.32714 |
| gene-AT2C | 28.88069 | 25.8146  | 26.29824 | 27.31273 | 25.37916 | 25.47294 | 42.22393 | 39.22262 |
| gene-AT2C | 9.124791 | 8.844543 | 6.402175 | 5.010739 | 5.619251 | 6.683166 | 2.643401 | 2.740195 |
| gene-AT5C | 2.230461 | 1.912167 | 2.382741 | 4.034417 | 4.439853 | 3.153503 | 1.521304 | 1.334848 |
| gene-AT5C | 26.49145 | 23.41029 | 28.21469 | 11.47786 | 11.42124 | 11.90786 | 11.8688  | 11.69877 |
| gene-AT5C | 10.51937 | 10.66403 | 11.19442 | 8.523599 | 9.309064 | 9.565464 | 4.823149 | 3.924192 |
| gene-AT4C | 49.5837  | 51.20356 | 50.2453  | 105.9919 | 103.6052 | 107.2649 | 53.27896 | 54.61234 |
| gene-AT4C | 1.387634 | 1.16516  | 1.402622 | 0.771815 | 0.850149 | 0.924115 | 0.35293  | 0.493867 |
| gene-AT1C | 1.433749 | 1.592263 | 1.549101 | 1.126548 | 1.258627 | 1.623878 | 1.504067 | 1.224331 |
| gene-AT3C | 13.4475  | 13.56139 | 14.84839 | 4.23207  | 4.649777 | 3.810417 | 7.243084 | 7.515595 |
| gene-AT5C | 169.9446 | 161.3116 | 164.6431 | 91.39605 | 84.17496 | 88.09288 | 19.6398  | 22.42145 |
| gene-AT3C | 0.17375  | 0.128012 | 0.11468  | 0.314711 | 0.307799 | 0.418104 | 0.176756 | 0.02289  |
| gene-AT5C | 4.149031 | 4.248735 | 4.72701  | 4.918934 | 4.751567 | 5.376129 | 7.003943 | 5.525869 |
| gene-AT4C | 4.150384 | 4.224971 | 3.847608 | 2.21806  | 1.676702 | 2.225841 | 1.179168 | 1.243963 |
| gene-AT1C | 1.315998 | 1.263414 | 0.999094 | 0.805403 | 1.246104 | 0.487732 | 1.019973 | 2.216414 |
| gene-AT1C | 2.583013 | 2.683973 | 2.462007 | 4.295278 | 5.698705 | 5.905783 | 1.575941 | 0.93124  |
| gene-AT5C | 4.513699 | 6.511581 | 6.179865 | 2.24854  | 2.293868 | 4.574005 | 5.578989 | 6.405691 |
| gene-AT5C | 0.156786 | 0        | 0.058272 | 0        | 0.113589 | 0.155834 | 2.08485  | 1.94383  |
| gene-AT5C | 2.291005 | 2.953017 | 3.128835 | 3.335116 | 3.053761 | 4.134049 | 1.913453 | 1.623519 |
| gene-AT1C | 3.941319 | 3.847465 | 3.6768   | 3.140358 | 2.922245 | 2.86481  | 4.520731 | 4.399299 |
| gene-AT4C | 7.222284 | 6.403829 | 6.238893 | 4.868568 | 5.13693  | 5.411776 | 7.8318   | 8.115953 |
| gene-AT1C | 2.082347 | 1.98476  | 2.171383 | 0.484154 | 0.433547 | 0.518492 | 3.95069  | 4.892329 |
| gene-AT5C | 19.36127 | 19.03538 | 18.22134 | 18.24918 | 17.60244 | 18.54071 | 28.64608 | 30.46461 |
| gene-AT1C | 2.218188 | 2.993061 | 2.306053 | 3.149839 | 3.188518 | 2.695443 | 3.036636 | 4.398446 |
| gene-AT1C | 2.54965  | 2.046782 | 2.016051 | 0.887105 | 0.866197 | 1.046639 | 4.590028 | 5.452463 |
| gene-AT4C | 40.40857 | 41.21033 | 36.84863 | 37.21348 | 37.91802 | 33.69361 | 51.23523 | 53.25377 |
| gene-AT3C | 28.1647  | 27.52771 | 28.32501 | 21.78598 | 22.62919 | 23.83329 | 53.07207 | 52.52927 |
| gene-AT5C | 27.86046 | 26.87585 | 25.73661 | 5.775248 | 7.406322 | 6.258501 | 6.409438 | 7.801148 |
| gene-AT5C | 3.48216  | 2.431982 | 2.949748 | 2.23402  | 1.856103 | 2.226745 | 0.472002 | 0.524643 |
| gene-AT2C | 81.51353 | 75.29644 | 75.63023 | 89.21133 | 95.86597 | 93.82776 | 33.72453 | 35.76885 |
| gene-AT4C | 3.866886 | 4.082703 | 3.616763 | 10.55441 | 9.351872 | 8.511484 | 4.454517 | 4.070743 |
| gene-AT1C | 1.405901 | 1.239844 | 2.323709 | 6.552431 | 7.079302 | 5.978359 | 2.457344 | 2.200292 |
| gene-AT5C | 0.583331 | 0.450978 | 0.842513 | 1.384496 | 1.216077 | 1.221029 | 0.769911 | 0.830437 |
| gene-AT2C | 1.165202 | 1.349067 | 1.272839 | 1.35936  | 1.32495  | 1.273868 | 0.427107 | 0.552133 |
| gene-AT3C | 16.05569 | 11.65982 | 12.55487 | 6.150136 | 7.209036 | 6.606644 | 22.51497 | 23.08231 |
| gene-AT5C | 0.398972 | 0.392014 | 0.353992 | 0.103273 | 0.208704 | 0.174093 | 1.290239 | 1.236209 |
| gene-AT3C | 271.4904 | 273.3346 | 279.7803 | 266.0896 | 259.8307 | 263.0777 | 435.7926 | 471.2359 |
| gene-AT5C | 0.596103 | 0.877251 | 0.855304 | 0.922774 | 1.309027 | 1.07337  | 0.128645 | 0.185205 |
| gene-AT4C | 11.03239 | 12.76489 | 11.62477 | 5.683392 | 6.401732 | 5.628796 | 9.990671 | 10.36155 |
| gene-AT4C | 0.953781 | 0.858146 | 1.060931 | 0.696295 | 0.953104 | 0.958558 | 0.191806 | 0.14921  |
| gene-AT3C | 5.425367 | 4.489201 | 5.312419 | 4.87552  | 6.118714 | 5.08686  | 8.097909 | 8.424091 |

|            |          |          |          |          |          |          |          |          |
|------------|----------|----------|----------|----------|----------|----------|----------|----------|
| gene-AT1C  | 25.91271 | 25.52527 | 23.56003 | 23.81366 | 20.5157  | 23.52535 | 30.3297  | 29.49696 |
| gene-AT3C  | 22.06091 | 20.18474 | 21.59928 | 16.38727 | 18.82385 | 18.64064 | 28.54076 | 31.09729 |
| gene-AT5C  | 1.100439 | 0.530776 | 0.631582 | 1.005776 | 1.352406 | 1.604609 | 0.855661 | 0.871575 |
| gene-AT5C  | 2.019997 | 2.184471 | 2.256846 | 2.340775 | 1.994681 | 2.129018 | 2.482742 | 2.000228 |
| gene-AT1C  | 10.04019 | 10.36119 | 11.24676 | 6.741922 | 6.514601 | 7.382143 | 15.28499 | 15.7266  |
| gene-AT5C  | 4.566337 | 4.172319 | 3.877241 | 2.8624   | 2.263632 | 3.170236 | 4.648602 | 3.68876  |
| gene-AT4C  | 37.34029 | 34.34498 | 33.6028  | 18.5799  | 17.52028 | 22.92353 | 49.94499 | 43.92624 |
| gene-AT3C  | 75.68749 | 69.50127 | 74.60075 | 52.96663 | 49.60605 | 49.70152 | 115.9472 | 123.3152 |
| gene-AT3C  | 2.887845 | 2.033713 | 3.277254 | 1.984344 | 1.741551 | 1.677614 | 1.842274 | 2.148508 |
| gene-AT1C  | 1.517419 | 1.46749  | 1.479033 | 1.985736 | 2.222411 | 2.764483 | 1.073715 | 0.565457 |
| gene-AT4C  | 39.69376 | 41.77177 | 43.0161  | 30.48803 | 30.02007 | 30.04533 | 40.06543 | 43.59921 |
| Arabidopsi | 1.336154 | 1.447594 | 1.289892 | 2.005321 | 1.202841 | 1.512122 | 6.332586 | 3.784845 |
| gene-AT5C  | 3.333099 | 2.825549 | 3.504381 | 3.037242 | 2.478397 | 2.907307 | 1.359203 | 1.108885 |
| gene-AT4C  | 1.669841 | 1.250504 | 1.247149 | 2.133656 | 2.148379 | 2.512908 | 0.478497 | 1.196068 |
| gene-AT1C  | 4.06713  | 3.562284 | 4.037601 | 5.141282 | 5.276002 | 5.414968 | 4.445852 | 5.741622 |
| gene-AT4C  | 10.66974 | 9.52044  | 9.242363 | 7.6325   | 7.471191 | 7.827903 | 3.995113 | 4.595504 |
| gene-AT3C  | 3.359386 | 3.084254 | 2.673212 | 6.681102 | 6.35568  | 5.867712 | 5.771575 | 6.157788 |
| gene-AT5C  | 0.198967 | 0.347255 | 0.43274  | 0.254849 | 0.74548  | 0.398686 | 1.128828 | 1.355553 |
| gene-AT2C  | 11.44641 | 11.35926 | 10.03339 | 14.75367 | 12.38951 | 12.98935 | 3.650398 | 2.837652 |
| gene-AT1C  | 1.14147  | 1.554378 | 1.281495 | 0.815777 | 0.66995  | 0.444974 | 0.525277 | 0.277922 |
| gene-AT1C  | 2.55722  | 2.210587 | 1.973541 | 0.486711 | 0.696651 | 0.570801 | 0.293101 | 0.040617 |
| gene-AT1C  | 5.232623 | 5.179479 | 5.024225 | 2.409132 | 3.096233 | 4.302057 | 5.255273 | 4.10178  |
| gene-AT2C  | 4.086774 | 3.821837 | 3.469736 | 10.74042 | 9.84362  | 10.34146 | 1.858256 | 1.911601 |
| gene-AT2C  | 6.892762 | 8.969715 | 7.611596 | 11.99842 | 11.64573 | 12.84266 | 5.43482  | 6.540838 |
| gene-AT4C  | 1.345447 | 1.463076 | 1.359884 | 0.919659 | 0.452361 | 0.640292 | 0.296557 | 0.174461 |
| gene-AT1C  | 18.29465 | 18.67695 | 19.39535 | 20.27075 | 22.25654 | 21.53485 | 0.514711 | 0.667392 |
| gene-AT2C  | 10.2415  | 9.115915 | 10.88231 | 23.09836 | 23.61826 | 23.64839 | 4.355078 | 4.472019 |
| gene-AT1C  | 1.206769 | 1.413816 | 1.500956 | 0.20758  | 0.389136 | 0.179379 | 4.409412 | 3.84898  |
| gene-AT1C  | 6.021605 | 6.478492 | 7.18443  | 10.49806 | 10.84127 | 9.92267  | 2.600668 | 3.875547 |
| gene-AT4C  | 0        | 0.138572 | 0.177352 | 0.529012 | 0.530154 | 0.747935 | 0.099367 | 0.106176 |
| gene-AT2C  | 0.842853 | 0.985326 | 1.164549 | 1.361791 | 1.260513 | 1.683127 | 0.993926 | 0.942365 |
| gene-AT1C  | 1.756146 | 1.404288 | 1.795217 | 2.264506 | 1.99451  | 2.042995 | 0.612833 | 0.661841 |
| gene-AT5C  | 19.3384  | 15.88629 | 15.94264 | 18.60498 | 18.96743 | 17.27967 | 33.50475 | 37.37009 |
| gene-AT4C  | 46.24427 | 48.13897 | 49.39717 | 34.42383 | 34.55866 | 34.57582 | 64.90112 | 69.59827 |
| gene-AT5C  | 3.233993 | 2.927433 | 3.276603 | 4.468651 | 4.855476 | 5.440723 | 7.597625 | 6.021692 |
| gene-AT3C  | 27.3198  | 27.22273 | 28.15583 | 24.46733 | 23.38399 | 24.82275 | 24.7686  | 24.30129 |
| gene-AT1C  | 17.43726 | 15.94553 | 18.36487 | 16.30075 | 14.61775 | 17.06833 | 29.66633 | 28.68163 |
| gene-AT1C  | 21.15129 | 22.53157 | 21.44133 | 12.55769 | 11.65069 | 12.54881 | 18.41406 | 17.4479  |
| gene-AT5C  | 0.412993 | 0        | 0.163016 | 0.102129 | 0.026262 | 0.286144 | 0.144692 | 0        |
| gene-AT3C  | 9.205    | 10.06401 | 8.825632 | 5.064619 | 4.658048 | 5.337062 | 1.170949 | 1.638481 |
| gene-AT3C  | 6.778191 | 7.113842 | 5.45608  | 39.83323 | 40.93428 | 42.41672 | 9.380001 | 10.32725 |
| gene-AT1C  | 48.70704 | 50.75434 | 49.60644 | 49.51066 | 47.15796 | 45.14362 | 17.72714 | 16.97782 |
| gene-AT5C  | 2.604991 | 2.516694 | 2.110253 | 1.682069 | 1.89039  | 1.701912 | 1.764887 | 2.959172 |
| gene-AT5C  | 57.85786 | 56.01858 | 58.1954  | 61.76056 | 54.94694 | 56.57072 | 73.90255 | 72.18618 |
| gene-AT1C  | 1.080408 | 0.633682 | 1.341668 | 0.512564 | 0.913664 | 1.618859 | 0.145572 | 0.160254 |
| gene-AT3C  | 12.79488 | 12.39933 | 13.33339 | 8.819252 | 9.345063 | 7.710614 | 23.09346 | 22.48779 |
| gene-AT3C  | 16.76591 | 15.5599  | 15.48502 | 9.824234 | 10.06027 | 9.999525 | 21.69763 | 18.99725 |
| gene-AT1C  | 20.34632 | 18.25267 | 18.45665 | 17.42912 | 16.15461 | 18.07128 | 26.55796 | 29.00119 |
| gene-AT4C  | 0.735808 | 0.888702 | 0.746412 | 1.060111 | 1.043509 | 0.885537 | 0.533417 | 0.274773 |
| gene-AT4C  | 2.970293 | 2.731784 | 3.164231 | 3.085926 | 1.846861 | 1.831736 | 0.443443 | 0.897623 |
| gene-AT5C  | 7.156285 | 7.367422 | 7.832814 | 10.7994  | 8.962497 | 9.418697 | 10.9043  | 11.58393 |

|            |          |          |          |          |          |          |          |          |
|------------|----------|----------|----------|----------|----------|----------|----------|----------|
| gene-AT1C  | 4.680823 | 2.961271 | 4.434871 | 3.800267 | 4.119288 | 3.42338  | 4.976441 | 5.155723 |
| gene-AT5C  | 4.197209 | 3.294608 | 3.392164 | 3.650327 | 4.089731 | 3.407584 | 1.284379 | 1.625512 |
| gene-AT1C  | 0.123521 | 0.189817 | 0.160104 | 0.697036 | 1.357195 | 0.496195 | 0.902116 | 1.275106 |
| gene-AT1C  | 51.03552 | 49.67351 | 49.71484 | 25.10559 | 25.70619 | 23.07517 | 10.52642 | 13.14926 |
| gene-AT3C  | 17.96672 | 18.95049 | 19.49958 | 19.45017 | 19.02824 | 20.0606  | 30.11301 | 33.14315 |
| gene-AT1C  | 5.570287 | 5.590888 | 6.621668 | 4.846969 | 4.331295 | 3.814347 | 1.94099  | 2.242408 |
| gene-AT1C  | 85.21647 | 79.81583 | 88.40627 | 67.19964 | 70.33103 | 66.51135 | 107.9986 | 111.1223 |
| Arabidopsi | 0.181318 | 0.199361 | 0.204751 | 0.178819 | 0.258748 | 0.256816 | 1.419127 | 0.765453 |
| gene-AT1C  | 0.414459 | 0.340896 | 0.273509 | 1.223204 | 1.148332 | 0.70787  | 0.629867 | 0.130276 |
| Arabidopsi | 0.827132 | 1.334131 | 0.854931 | 0.572807 | 0.941672 | 0.954844 | 0.78933  | 0.20883  |
| gene-AT3C  | 0.109401 | 0.067961 | 0.076366 | 1.959517 | 2.024906 | 1.982306 | 0        | 0        |
| gene-AT4C  | 3.016937 | 3.625824 | 3.196599 | 1.665336 | 2.286311 | 1.467795 | 0.830263 | 0.667902 |
| gene-AT4C  | 2.582839 | 2.588085 | 2.929152 | 5.629884 | 4.902173 | 5.069369 | 0.683277 | 0.533301 |
| gene-AT4C  | 5.129014 | 5.549938 | 5.184055 | 4.952067 | 5.758509 | 6.369787 | 4.09381  | 2.679262 |
| gene-AT1C  | 21.65651 | 22.45822 | 24.05712 | 38.85159 | 36.07867 | 32.86509 | 18.13922 | 17.49922 |
| gene-AT1C  | 2.192971 | 3.219487 | 2.706096 | 2.269847 | 2.175197 | 2.686457 | 3.635979 | 3.553046 |
| gene-AT5C  | 12.98323 | 14.53662 | 14.44586 | 12.89165 | 12.23232 | 11.21889 | 5.391271 | 5.511518 |
| gene-AT5C  | 23.23799 | 23.2416  | 22.43972 | 11.36021 | 11.13989 | 9.237058 | 8.546831 | 8.960294 |
| Arabidopsi | 2.854266 | 3.981596 | 2.621654 | 6.259573 | 6.182005 | 8.356073 | 1.743795 | 1.221145 |
| gene-AT2C  | 4.465538 | 5.108957 | 5.313717 | 3.014213 | 3.649306 | 4.159817 | 8.186253 | 7.567163 |
| gene-AT1C  | 10.16419 | 9.826893 | 9.560579 | 11.19217 | 11.08695 | 10.33533 | 4.442898 | 4.914909 |
| gene-AT1C  | 4.213809 | 3.491048 | 3.759642 | 5.493714 | 6.407128 | 4.953192 | 4.715104 | 5.731264 |
| gene-AT2C  | 3.851291 | 3.906459 | 3.702063 | 3.470774 | 3.095511 | 3.139069 | 5.167031 | 5.137413 |
| gene-AT5C  | 0.028146 | 0.090981 | 0.025644 | 1.200923 | 0.816903 | 0.707172 | 0.134283 | 0.124928 |
| gene-AT1C  | 44.91736 | 44.23477 | 45.83793 | 58.91683 | 58.65982 | 61.04644 | 96.39858 | 99.78223 |
| gene-AT3C  | 42.66742 | 41.51263 | 42.56463 | 29.28369 | 29.901   | 28.77164 | 55.1009  | 54.53325 |
| gene-AT2C  | 2.134859 | 2.138236 | 2.270267 | 2.753455 | 2.847755 | 3.820868 | 0.893377 | 0.889506 |
| gene-AT2C  | 0.71713  | 0.929333 | 0.811916 | 0.93274  | 1.473237 | 1.291243 | 0.157752 | 0.233143 |
| gene-AT2C  | 44.23748 | 38.72387 | 42.08086 | 59.48354 | 61.78542 | 61.09405 | 10.67066 | 14.40173 |
| gene-AT5C  | 6.629696 | 6.914438 | 6.950676 | 5.678081 | 4.531953 | 4.359415 | 8.343771 | 10.01621 |
| gene-AT5C  | 7.565108 | 6.972277 | 5.01915  | 8.772228 | 8.215755 | 8.739632 | 9.168535 | 9.27203  |
| gene-AT1C  | 22.59402 | 21.43129 | 21.16356 | 10.48497 | 10.3486  | 10.4777  | 24.02141 | 25.5826  |
| gene-AT5C  | 8.189131 | 8.93291  | 9.697162 | 14.71705 | 13.83196 | 12.72702 | 7.988257 | 7.933345 |
| gene-AT3C  | 0.653698 | 0.724609 | 1.071398 | 2.283922 | 1.771304 | 2.770743 | 1.487454 | 1.452005 |
| gene-AT3C  | 0.172376 | 0.278853 | 0.349351 | 0.904878 | 0.608046 | 0.594251 | 0.11479  | 0.096865 |
| gene-AT3C  | 4.398478 | 4.36463  | 3.684336 | 282.5592 | 283.7614 | 286.9476 | 3.682685 | 3.506024 |
| gene-AT4C  | 1.374998 | 1.349373 | 1.401069 | 0.541524 | 0.079942 | 0.58505  | 0.524619 | 0.222566 |
| gene-AT4C  | 14.901   | 18.07932 | 20.96755 | 22.95941 | 22.63615 | 22.6247  | 13.92706 | 10.86354 |
| gene-AT3C  | 6.576401 | 5.161585 | 5.408312 | 3.890258 | 3.636643 | 3.963192 | 5.085866 | 5.366876 |
| gene-AT5C  | 0.317156 | 0.387417 | 0.12532  | 0.428483 | 0.436068 | 0.575552 | 2.556145 | 1.404628 |
| gene-AT3C  | 5.523995 | 5.486002 | 5.690386 | 11.09668 | 9.242067 | 11.32991 | 3.468532 | 3.09101  |
| gene-AT5C  | 134.078  | 126.7838 | 134.724  | 111.7128 | 112.8394 | 117.3217 | 193.1435 | 202.7838 |
| gene-AT3C  | 443.6089 | 454.0056 | 457.9992 | 299.2849 | 310.2204 | 299.2711 | 625.7729 | 634.1228 |
| gene-AT1C  | 5.312242 | 5.633339 | 5.431873 | 1.239679 | 1.619673 | 1.862347 | 8.422584 | 8.896955 |
| gene-AT1C  | 6.469131 | 4.676964 | 5.409488 | 21.19733 | 20.64186 | 22.43614 | 1.298037 | 1.313805 |
| gene-AT5C  | 0.099027 | 0.204038 | 0.06555  | 1.035104 | 1.423146 | 1.843916 | 0.204336 | 0.212674 |
| gene-AT1C  | 2.171245 | 1.900796 | 2.73644  | 0.456561 | 0.512076 | 0.478242 | 0.851316 | 0.942944 |
| gene-AT3C  | 12.59926 | 10.40684 | 11.12199 | 5.048183 | 4.032664 | 5.110531 | 3.751042 | 4.38365  |
| gene-AT5C  | 1.78213  | 2.321433 | 1.337464 | 2.704939 | 3.975003 | 2.867357 | 1.100228 | 1.263961 |
| gene-AT5C  | 10.415   | 12.09748 | 12.10487 | 6.479128 | 8.366267 | 6.402312 | 12.89253 | 13.06373 |
| gene-AT5C  | 2.953221 | 3.597247 | 2.675481 | 3.588872 | 3.505884 | 3.327863 | 1.505124 | 1.175786 |

|           |          |          |          |          |          |          |          |          |
|-----------|----------|----------|----------|----------|----------|----------|----------|----------|
| gene-AT1C | 2.613932 | 3.002783 | 3.431893 | 2.412732 | 1.776655 | 2.224544 | 6.500004 | 5.295354 |
| gene-AT1C | 7.799531 | 6.901764 | 6.406761 | 8.072964 | 9.354141 | 8.909878 | 5.014141 | 4.591661 |
| gene-AT3C | 6.75132  | 5.417962 | 5.193036 | 1.690708 | 2.20646  | 0.978681 | 1.087891 | 1.059699 |
| gene-AT1C | 8.930071 | 9.893047 | 8.83788  | 7.585588 | 8.483412 | 8.853723 | 65.37421 | 71.80823 |
| gene-AT1C | 63.29822 | 61.96741 | 61.63934 | 98.79554 | 102.0966 | 98.09049 | 37.37749 | 38.76949 |
| gene-AT5C | 1.772755 | 1.787413 | 1.595681 | 2.513131 | 2.357744 | 2.902769 | 1.661866 | 2.05999  |
| gene-AT5C | 37.96471 | 39.98847 | 38.75683 | 28.45647 | 24.39716 | 27.10734 | 55.31312 | 58.32842 |
| gene-AT5C | 6.237542 | 6.155833 | 6.411668 | 6.354073 | 6.958652 | 7.017476 | 3.059129 | 3.53626  |
| gene-AT1C | 21.97128 | 21.94801 | 22.28323 | 27.94171 | 28.85894 | 28.64554 | 32.29111 | 33.82884 |
| gene-AT3C | 2.238678 | 2.58105  | 2.678299 | 1.96948  | 2.225573 | 1.966306 | 1.890329 | 2.486854 |
| gene-AT1C | 64.00357 | 67.82271 | 63.6044  | 34.38785 | 34.61313 | 37.29329 | 78.3318  | 82.81049 |
| gene-AT4C | 16.40853 | 16.59661 | 15.5575  | 4.812597 | 4.397191 | 3.572925 | 34.79018 | 36.56405 |
| gene-AT1C | 2.961345 | 3.954224 | 3.203173 | 2.835156 | 2.624984 | 1.605563 | 0.684482 | 0.528199 |
| gene-AT1C | 6.31972  | 5.241659 | 5.167385 | 5.710478 | 5.886012 | 6.783327 | 7.311976 | 7.682166 |
| gene-AT1C | 0.521219 | 0.977928 | 0.751842 | 2.080303 | 1.14371  | 2.036989 | 0.580408 | 0.968045 |
| gene-AT4C | 3.364184 | 2.905375 | 3.358331 | 4.146014 | 3.356021 | 3.170979 | 1.339739 | 1.717063 |
| gene-AT5C | 0.660315 | 0.644299 | 0.831548 | 1.902757 | 1.95876  | 1.444028 | 0.117414 | 0.439709 |
| gene-AT4C | 3.464696 | 3.070456 | 2.829774 | 3.533967 | 3.160498 | 3.221859 | 4.843068 | 5.718997 |
| gene-AT1C | 10.14449 | 9.748026 | 9.595155 | 11.5501  | 11.23623 | 12.47361 | 20.03946 | 19.60382 |
| gene-AT4C | 8.34179  | 5.625314 | 17.53522 | 13.30089 | 25.49247 | 11.50935 | 3.130656 | 0.168676 |
| gene-AT1C | 31.82039 | 31.01737 | 29.63567 | 21.74401 | 23.01667 | 22.16334 | 31.2198  | 31.34627 |
| gene-AT1C | 13.88029 | 14.19998 | 14.03497 | 7.327504 | 5.877719 | 6.610567 | 41.21345 | 42.06109 |
| gene-AT4C | 2.956367 | 3.137287 | 2.155969 | 1.505982 | 1.233691 | 0.862901 | 7.725038 | 6.899268 |
| gene-AT4C | 5.140338 | 4.68037  | 4.017108 | 10.72353 | 11.07046 | 11.83857 | 2.956215 | 2.252701 |
| gene-AT4C | 5.008969 | 7.363751 | 4.539736 | 8.787377 | 6.900801 | 8.207551 | 7.461737 | 7.654542 |
| gene-AT4C | 0.378604 | 0.523827 | 0.897688 | 0.712986 | 1.194273 | 0.728261 | 0.085905 | 0.149953 |
| gene-AT4C | 1.358481 | 1.503717 | 1.680307 | 5.41649  | 5.293665 | 6.075661 | 3.453015 | 3.699485 |
| gene-AT1C | 5.016004 | 3.899848 | 3.601499 | 4.106756 | 5.649568 | 3.997609 | 1.696313 | 2.108068 |
| gene-AT3C | 0.428942 | 0.577094 | 0.447603 | 0.361942 | 0.260377 | 0.431862 | 1.508695 | 2.170761 |
| gene-AT1C | 5.39058  | 5.82023  | 5.304005 | 7.703768 | 6.800113 | 7.83211  | 3.68478  | 3.546171 |
| gene-AT3C | 2.957047 | 3.206739 | 2.981878 | 4.146315 | 3.879745 | 4.571346 | 2.597167 | 3.498921 |
| gene-AT3C | 21.74709 | 22.03348 | 21.00692 | 62.23822 | 59.80146 | 59.95789 | 13.48642 | 13.48599 |
| gene-AT1C | 0.457454 | 0.183415 | 0.316702 | 2.594118 | 2.856522 | 1.995162 | 0.060285 | 0.050101 |
| gene-AT2C | 59.10808 | 60.82065 | 62.15743 | 51.06809 | 52.07995 | 49.84968 | 96.90347 | 100.007  |
| gene-AT4C | 2.890263 | 3.172696 | 2.535248 | 4.079063 | 4.709982 | 3.729046 | 1.005448 | 1.659258 |
| gene-AT2C | 2.861816 | 2.511106 | 2.828729 | 6.816679 | 5.746563 | 4.760598 | 1.763898 | 1.665525 |
| gene-AT2C | 140.4851 | 209.9373 | 195.4534 | 245.5982 | 257.5591 | 322.7142 | 1702     | 581.6684 |
| gene-AT4C | 8.034156 | 8.055696 | 7.412602 | 5.995674 | 6.083696 | 5.952487 | 8.291924 | 8.510295 |
| gene-AT1C | 3.859236 | 3.136058 | 3.383547 | 0.848926 | 1.430986 | 1.104778 | 4.506174 | 4.365598 |
| gene-AT3C | 10.32824 | 10.18574 | 10.26789 | 0.381599 | 0.540714 | 0.54205  | 0.643769 | 0.534964 |
| gene-AT4C | 41.92314 | 35.27596 | 37.04176 | 40.22999 | 41.82922 | 45.93263 | 50.61584 | 46.38931 |
| gene-AT3C | 18.18637 | 18.31999 | 17.73305 | 10.72662 | 9.494364 | 11.13531 | 22.85112 | 24.81902 |
| gene-AT5C | 0.756386 | 0.354758 | 0.663012 | 0.815924 | 0.521186 | 0.602303 | 0.731616 | 0.922394 |
| gene-AT4C | 12.95663 | 13.32071 | 13.23887 | 29.24092 | 31.93715 | 29.628   | 8.176281 | 6.564569 |
| gene-AT3C | 2.038388 | 2.428275 | 1.443531 | 5.256279 | 5.895673 | 6.624939 | 2.523096 | 2.803528 |
| gene-AT1C | 0.944372 | 0.897312 | 1.078264 | 0.327769 | 0.181476 | 0.310105 | 0.35506  | 0.241302 |
| gene-AT2C | 9.636937 | 8.955409 | 11.29148 | 12.26015 | 11.80701 | 11.63806 | 5.631353 | 6.244436 |
| gene-AT2C | 2.655103 | 2.760485 | 3.351934 | 1.113498 | 1.059092 | 1.19334  | 1.864428 | 2.514267 |
| gene-AT5C | 12.88307 | 12.1476  | 12.31564 | 3.564889 | 3.031487 | 2.717107 | 4.79782  | 5.852024 |
| gene-AT5C | 22.9965  | 22.13694 | 20.48587 | 9.495621 | 8.56628  | 9.28598  | 12.86813 | 14.41222 |
| gene-AT5C | 1.655599 | 1.636198 | 1.851169 | 2.026345 | 2.222402 | 1.706645 | 0.528421 | 0.199317 |



|           |          |          |          |          |          |          |          |          |
|-----------|----------|----------|----------|----------|----------|----------|----------|----------|
| gene-AT2C | 8.616838 | 7.33242  | 8.661926 | 5.414948 | 4.521732 | 4.219653 | 10.8481  | 10.68548 |
| gene-AT3C | 0.790858 | 0.882827 | 0.932155 | 1.082831 | 0.897833 | 1.235608 | 0.379183 | 0.131017 |
| gene-AT5C | 4.039246 | 3.166467 | 4.199752 | 2.803397 | 2.28855  | 2.279239 | 0.406579 | 0.32045  |
| gene-AT1C | 88.31628 | 87.37129 | 87.48054 | 49.90164 | 48.61062 | 47.42978 | 168.4947 | 168.6681 |
| gene-AT1C | 4.303191 | 4.71801  | 4.777522 | 3.413801 | 4.206764 | 3.876626 | 1.804976 | 1.864531 |
| gene-AT1C | 2.122552 | 2.090261 | 2.255896 | 1.339942 | 1.146139 | 0.864616 | 3.466654 | 3.711233 |
| gene-AT5C | 1.780401 | 1.090097 | 1.929575 | 1.772476 | 2.884185 | 2.220659 | 0.456755 | 1.246387 |
| gene-AT2C | 4.849983 | 4.665572 | 5.495044 | 10.82162 | 11.76765 | 11.89654 | 3.703292 | 4.065691 |
| gene-AT5C | 14.69581 | 13.94969 | 13.85371 | 5.803541 | 5.519551 | 6.499606 | 10.3768  | 12.50262 |
| gene-AT5C | 12.74563 | 11.7529  | 10.54813 | 11.76847 | 11.73792 | 14.74811 | 11.5787  | 12.40223 |
| gene-AT4C | 1.75438  | 1.670131 | 1.600121 | 1.135969 | 0.639586 | 0.727102 | 0.454882 | 0.4025   |
| gene-AT3C | 8.766975 | 9.393203 | 8.478644 | 4.072988 | 5.2256   | 5.435846 | 6.079224 | 6.475036 |
| gene-AT1C | 90.53565 | 92.73584 | 89.19969 | 86.26984 | 86.57849 | 86.91115 | 25.40551 | 26.41342 |
| gene-AT2C | 1.328816 | 1.206384 | 1.162791 | 0.485332 | 0.684215 | 1.083304 | 0.37763  | 0.595047 |
| gene-AT1C | 18.29832 | 20.28477 | 21.18149 | 4.40828  | 5.136789 | 4.30345  | 56.32655 | 62.6555  |
| gene-AT4C | 40.79745 | 43.48453 | 41.33399 | 66.2173  | 69.00811 | 64.20509 | 22.14337 | 25.24731 |
| gene-AT4C | 13.75869 | 13.13123 | 13.93537 | 10.83516 | 11.49563 | 11.0684  | 3.480708 | 3.047283 |
| gene-AT5C | 9.392709 | 8.510347 | 8.394443 | 6.668654 | 7.156751 | 6.258022 | 9.291754 | 9.711421 |
| gene-AT4C | 0.079191 | 0.148046 | 0.220044 | 0.89774  | 0.819161 | 0.778889 | 0.228383 | 0.221433 |
| gene-AT5C | 75.56589 | 74.43578 | 75.18745 | 278.6668 | 283.5122 | 279.4815 | 32.53914 | 32.26946 |
| gene-AT3C | 15.55442 | 18.18221 | 17.37446 | 12.31681 | 13.1584  | 12.48667 | 22.38171 | 18.96395 |
| gene-AT3C | 5.929034 | 6.17401  | 5.706296 | 2.514969 | 3.357207 | 2.930549 | 4.339271 | 6.058345 |
| gene-AT1C | 0.161842 | 0.133134 | 0.232786 | 1.073491 | 0.642261 | 0.731437 | 0.159471 | 0.263719 |
| gene-AT5C | 1.501366 | 1.300703 | 1.146998 | 1.833282 | 1.650542 | 0.862132 | 0.043262 | 0.128819 |
| gene-AT3C | 9.693014 | 11.21997 | 11.1205  | 15.53596 | 15.2582  | 15.8867  | 2.45795  | 2.368322 |
| gene-AT5C | 3.35844  | 2.857206 | 2.55156  | 1.094984 | 1.863902 | 1.963944 | 4.268979 | 4.773665 |
| gene-AT4C | 0.626442 | 1.032342 | 0.681232 | 0.96106  | 1.143246 | 0.804239 | 0.975216 | 0.637281 |
| gene-AT1C | 6.506689 | 7.752277 | 8.077129 | 3.479501 | 4.464051 | 4.152198 | 8.286556 | 7.412046 |
| gene-AT5C | 10.08244 | 11.1751  | 9.674989 | 9.185321 | 8.224173 | 7.813133 | 13.36796 | 14.1137  |
| gene-AT5C | 39.82701 | 40.59816 | 34.93358 | 30.82604 | 33.70997 | 29.9223  | 29.7328  | 32.82229 |
| gene-AT4C | 46.78877 | 45.74542 | 42.8247  | 86.3697  | 82.17602 | 72.17245 | 30.0016  | 31.74017 |
| gene-AT5C | 2.268513 | 1.290225 | 2.035821 | 0.324238 | 0.182581 | 0.628416 | 3.769127 | 4.016915 |
| gene-AT1C | 12.53336 | 12.68736 | 13.16921 | 20.74414 | 20.98093 | 19.8275  | 3.7962   | 4.108015 |
| gene-AT4C | 28.85175 | 26.85455 | 30.18157 | 34.23668 | 29.01011 | 30.87707 | 13.56508 | 13.13996 |
| gene-AT5C | 1.697211 | 1.17424  | 1.242938 | 2.809994 | 3.501506 | 4.085578 | 0.836507 | 0.396466 |
| gene-AT1C | 2.915063 | 3.122899 | 3.782501 | 2.644939 | 2.35687  | 2.744521 | 0.530169 | 1.176842 |
| gene-AT1C | 8.546916 | 8.332499 | 8.759093 | 8.629219 | 10.14709 | 9.814667 | 9.037724 | 9.164255 |
| gene-AT3C | 2.133974 | 1.906947 | 1.446768 | 1.723413 | 2.794278 | 3.059812 | 2.953339 | 4.059557 |
| gene-AT2C | 36.84664 | 33.01197 | 37.10502 | 12.83883 | 13.90505 | 12.69772 | 72.16296 | 74.88381 |
| gene-AT1C | 5.959823 | 5.98062  | 6.058359 | 3.343252 | 2.888567 | 2.358812 | 3.323332 | 2.908835 |
| gene-AT5C | 13.48719 | 13.74448 | 15.395   | 13.29273 | 14.85295 | 11.90441 | 18.08578 | 15.07114 |
| gene-AT1C | 15.88811 | 15.19798 | 14.50709 | 5.490713 | 5.875165 | 5.245726 | 14.48183 | 16.58804 |
| gene-AT5C | 4.311741 | 3.409892 | 2.953907 | 1.308226 | 1.095316 | 1.580627 | 2.577852 | 3.756827 |
| gene-AT4C | 4.61136  | 4.464961 | 5.107347 | 7.520148 | 7.822923 | 8.27028  | 1.754666 | 1.151178 |
| gene-AT1C | 154.6569 | 140.9722 | 148.2841 | 110.6859 | 108.2571 | 102.9124 | 228.6694 | 234.6968 |
| gene-AT1C | 11.6722  | 12.15125 | 11.77834 | 10.82677 | 10.80034 | 12.38914 | 13.28595 | 12.75901 |
| gene-AT1C | 39.04559 | 40.0592  | 39.37163 | 41.05164 | 41.98075 | 40.46311 | 50.40165 | 46.57642 |
| gene-AT5C | 29.02895 | 28.13998 | 31.08638 | 20.18454 | 20.8161  | 19.24874 | 27.52848 | 31.41542 |
| gene-AT4C | 2.714035 | 2.138783 | 3.211206 | 2.896368 | 3.683199 | 2.782965 | 0.614208 | 1.216287 |
| gene-AT2C | 1.871125 | 2.133268 | 1.574065 | 0.281254 | 0.166719 | 0.605742 | 1.028592 | 2.323619 |
| gene-AT1C | 35.06014 | 37.79441 | 36.40744 | 23.96197 | 21.76928 | 22.99098 | 11.63734 | 10.52743 |

|            |          |          |          |          |          |          |          |          |
|------------|----------|----------|----------|----------|----------|----------|----------|----------|
| gene-AT5C  | 7.182314 | 6.662823 | 7.144704 | 13.43212 | 12.36528 | 12.8708  | 1.576658 | 1.83955  |
| gene-AT5C  | 5.808073 | 5.278215 | 6.055742 | 6.925293 | 7.010741 | 6.861358 | 10.1876  | 10.44018 |
| gene-AT4C  | 5.27946  | 6.418096 | 6.468404 | 5.233874 | 2.995052 | 6.151886 | 4.654397 | 4.314973 |
| gene-AT5C  | 10.52808 | 9.590934 | 11.07755 | 8.01418  | 7.974242 | 8.433363 | 41.0042  | 43.79557 |
| gene-AT2C  | 1.142839 | 1.711099 | 1.490557 | 2.904664 | 3.610709 | 3.845135 | 3.264566 | 3.812775 |
| Arabidopsi | 6.343429 | 6.354011 | 5.352225 | 1.594731 | 1.498546 | 0.765345 | 3.007985 | 2.772621 |
| gene-AT4C  | 29.88398 | 36.72236 | 26.16362 | 40.5544  | 42.25468 | 42.11304 | 40.81452 | 40.49204 |
| gene-AT5C  | 12.00279 | 12.07797 | 12.28244 | 27.58663 | 30.52185 | 27.89221 | 6.239638 | 8.194307 |
| gene-AT2C  | 69.52252 | 70.17135 | 66.39348 | 34.3924  | 35.99908 | 35.36215 | 69.05195 | 72.3604  |
| gene-AT5C  | 1294.629 | 1250.12  | 1287.985 | 1307.577 | 1289.392 | 1281.719 | 2112.336 | 2047.294 |
| gene-AT5C  | 4.425183 | 3.267262 | 2.805981 | 4.75122  | 5.538013 | 3.759452 | 1.323313 | 1.305728 |
| gene-AT4C  | 5.567469 | 4.438493 | 3.854459 | 5.272307 | 5.807377 | 5.446289 | 5.67269  | 5.779962 |
| gene-AT3C  | 33.29112 | 32.1666  | 36.09572 | 56.19689 | 52.14186 | 49.46724 | 21.74896 | 21.22399 |
| gene-AT3C  | 0.893106 | 0.475869 | 0.582495 | 0.608206 | 0.270742 | 0.586216 | 0.219553 | 0.305302 |
| gene-AT4C  | 11.20611 | 11.1429  | 11.98702 | 9.42977  | 9.256769 | 9.883751 | 12.7743  | 13.84548 |
| gene-AT1C  | 20.44925 | 19.24204 | 20.38578 | 7.613514 | 7.520114 | 8.295345 | 40.98708 | 41.76225 |
| gene-AT3C  | 15.5311  | 20.86247 | 16.61141 | 6.428823 | 8.176037 | 7.243299 | 9.642377 | 11.79409 |
| gene-AT2C  | 10.28398 | 10.32994 | 12.79103 | 31.12963 | 33.49655 | 30.91485 | 0.503106 | 0.314223 |
| gene-AT3C  | 1150.567 | 1162.737 | 1147.344 | 415.734  | 410.5983 | 415.1689 | 2031.317 | 2016.117 |
| gene-AT5C  | 7.29096  | 7.37727  | 7.092817 | 6.328834 | 4.80393  | 4.729178 | 2.011495 | 1.669509 |
| gene-AT2C  | 2.156114 | 1.7252   | 1.386671 | 1.079992 | 1.062317 | 0.934757 | 2.745598 | 2.440038 |
| gene-AT5C  | 1.382245 | 1.390893 | 1.032128 | 1.034708 | 1.036165 | 1.044879 | 0.683233 | 0.534105 |
| gene-AT5C  | 0.999614 | 0.673119 | 1.010164 | 2.994661 | 2.918991 | 2.055058 | 1.200737 | 1.369764 |
| gene-AT1C  | 2.275562 | 2.508489 | 2.4102   | 2.297938 | 3.359727 | 3.835535 | 0.609303 | 0.571813 |
| gene-AT5C  | 17.66867 | 18.48712 | 21.32573 | 28.10125 | 28.52548 | 28.87287 | 46.40193 | 48.76049 |
| gene-AT1C  | 0.846738 | 0.972248 | 0.90311  | 1.065378 | 0.9385   | 1.142076 | 1.165858 | 1.612201 |
| gene-AT4C  | 19.63082 | 18.49351 | 19.90503 | 19.57665 | 18.36757 | 18.52178 | 25.89539 | 27.86266 |
| gene-AT5C  | 0.030978 | 0.045883 | 0.0345   | 1.142273 | 0.281969 | 1.202131 | 0.434277 | 0.147591 |
| gene-AT2C  | 4.567425 | 4.293185 | 4.652897 | 19.47959 | 18.80892 | 20.08832 | 4.733935 | 5.616438 |
| gene-AT3C  | 9.036845 | 10.35252 | 8.946649 | 4.459821 | 3.8805   | 4.306199 | 19.15865 | 17.99348 |
| gene-AT1C  | 7.719941 | 5.596595 | 7.526406 | 6.040167 | 4.831701 | 4.433098 | 2.027977 | 2.332711 |
| gene-AT3C  | 19.07188 | 23.64207 | 16.58654 | 42.67251 | 45.72434 | 46.10126 | 15.03138 | 12.39921 |
| gene-AT5C  | 7.67592  | 8.398678 | 7.953959 | 13.14742 | 13.35761 | 12.38413 | 7.825258 | 8.78495  |
| gene-AT5C  | 18.70331 | 19.17017 | 19.14237 | 12.98439 | 13.33886 | 12.66301 | 35.22673 | 36.227   |
| gene-AT2C  | 4.067119 | 3.438746 | 2.829231 | 1.171693 | 1.568064 | 1.365819 | 4.486009 | 4.117834 |
| gene-AT3C  | 163.6552 | 168.3804 | 163.4062 | 119.1532 | 116.7725 | 116.7721 | 229.4613 | 244.2255 |
| gene-AT3C  | 17.12999 | 16.7686  | 16.03193 | 7.69592  | 8.110353 | 9.057423 | 6.33206  | 5.09314  |
| gene-AT5C  | 1.665264 | 1.544839 | 1.722209 | 1.856081 | 1.891078 | 2.405282 | 2.238116 | 2.655276 |
| gene-AT1C  | 3.778408 | 2.255068 | 2.533824 | 2.24339  | 2.765357 | 2.379032 | 3.081057 | 2.676948 |
| gene-AT5C  | 3.834008 | 4.588997 | 3.606303 | 2.446271 | 3.097319 | 3.383694 | 1.599616 | 1.649485 |
| gene-AT1C  | 6.750017 | 6.319193 | 6.980876 | 14.82642 | 11.87735 | 14.17527 | 9.912275 | 8.451511 |
| gene-AT1C  | 3.17471  | 4.04099  | 3.753875 | 3.87272  | 4.281541 | 3.645814 | 4.382267 | 3.629884 |
| gene-AT4C  | 35.46502 | 34.43972 | 36.48745 | 19.62342 | 19.35894 | 17.54177 | 124.9385 | 131.9426 |
| gene-AT5C  | 27.15764 | 27.86837 | 26.32077 | 30.61518 | 31.24541 | 27.7044  | 9.187973 | 9.767468 |
| gene-AT5C  | 9.623982 | 8.088353 | 7.29334  | 10.98793 | 10.98515 | 12.09039 | 10.583   | 14.25615 |
| gene-AT2C  | 998.2686 | 969.3002 | 1003.979 | 462.0198 | 472.1992 | 458.1474 | 1471.368 | 1528.239 |
| gene-AT5C  | 6.560096 | 6.854269 | 6.21283  | 10.37121 | 9.336932 | 11.20155 | 4.204331 | 3.397558 |
| gene-AT5C  | 428.4521 | 414.3733 | 431.4495 | 61.30397 | 64.05647 | 61.63017 | 84.02628 | 82.94901 |
| gene-AT2C  | 8.632119 | 9.666623 | 9.286824 | 4.793433 | 5.320014 | 4.992291 | 17.35355 | 16.85291 |
| gene-AT5C  | 8.277591 | 7.580709 | 8.36305  | 14.32634 | 13.88559 | 12.92263 | 6.939114 | 7.316356 |
| gene-AT5C  | 1077.433 | 1074.446 | 1054.157 | 503.9712 | 549.7659 | 526.41   | 157.9715 | 157.0753 |

|           |          |          |          |          |          |          |          |          |
|-----------|----------|----------|----------|----------|----------|----------|----------|----------|
| gene-AT4C | 6.574463 | 6.645756 | 5.898975 | 11.76785 | 10.96702 | 11.10498 | 2.561678 | 2.403165 |
| gene-AT3C | 32.29854 | 34.05642 | 31.7744  | 14.25162 | 16.21297 | 14.32836 | 80.72509 | 73.75487 |
| gene-AT5C | 12.23372 | 12.9094  | 11.92518 | 9.501419 | 8.805842 | 9.19704  | 12.03472 | 13.35154 |
| gene-AT3C | 2.856462 | 3.492425 | 3.142685 | 14.93017 | 13.99596 | 13.33661 | 0.254346 | 0.217283 |
| gene-AT5C | 2.5321   | 2.977059 | 2.988912 | 3.577699 | 3.805583 | 4.396513 | 1.152034 | 1.734441 |
| gene-AT5C | 27.54632 | 25.37421 | 26.96705 | 16.67308 | 18.67985 | 17.86736 | 33.98589 | 33.44775 |
| gene-AT2C | 6.77832  | 7.106328 | 6.425062 | 3.503932 | 3.993577 | 4.133042 | 15.38006 | 15.23731 |
| gene-AT3C | 29.70919 | 27.84406 | 30.1597  | 24.02647 | 24.29417 | 24.68356 | 26.35047 | 29.6899  |
| gene-AT1C | 45.68764 | 44.73183 | 47.03855 | 36.50653 | 33.76342 | 34.64306 | 73.2996  | 80.29975 |
| gene-AT1C | 11.50547 | 11.25295 | 11.08234 | 14.62496 | 14.43159 | 15.9956  | 3.176695 | 3.067251 |
| gene-AT1C | 77.38738 | 77.09097 | 79.62234 | 59.56215 | 58.94598 | 58.55447 | 129.5952 | 132.0224 |
| gene-AT5C | 7.2978   | 8.039624 | 7.354421 | 8.028546 | 7.553002 | 7.268328 | 2.783601 | 2.7758   |
| gene-AT1C | 26.3494  | 29.02283 | 26.61835 | 31.66512 | 28.72879 | 30.2593  | 11.37116 | 11.42061 |
| gene-AT2C | 4.427981 | 4.131083 | 4.576204 | 3.871196 | 4.625982 | 4.336869 | 2.549464 | 1.754453 |
| gene-AT4C | 26.28544 | 25.51451 | 26.20369 | 22.64305 | 23.05011 | 22.92985 | 38.8511  | 43.09202 |
| gene-AT1C | 55.44038 | 53.79012 | 50.80784 | 58.3425  | 55.33668 | 51.75666 | 88.14823 | 94.83384 |
| gene-AT1C | 4.964122 | 5.562299 | 5.413448 | 5.889476 | 6.530473 | 5.11542  | 1.977194 | 2.44106  |
| gene-AT4C | 13.13759 | 13.14976 | 12.50791 | 13.74831 | 14.57475 | 13.18902 | 17.82823 | 19.93114 |
| gene-AT1C | 10.48323 | 8.995498 | 10.24019 | 13.41201 | 15.26177 | 14.3576  | 1.763861 | 2.66458  |
| gene-AT2C | 1.236055 | 1.112113 | 2.060592 | 5.462754 | 5.345235 | 4.954358 | 0.692689 | 0.840524 |
| gene-AT2C | 21.77093 | 22.45117 | 22.29142 | 26.94102 | 28.71341 | 28.84824 | 17.4461  | 17.42151 |
| gene-AT4C | 9.435349 | 9.928733 | 10.81089 | 16.95597 | 19.01068 | 17.67701 | 7.159004 | 6.983667 |
| gene-AT4C | 0.693718 | 0.994743 | 0.798591 | 2.419082 | 2.113292 | 1.951131 | 0.404191 | 0.572326 |
| gene-AT3C | 3.796199 | 3.309457 | 2.801682 | 3.520541 | 3.575938 | 4.151844 | 1.233305 | 0.514692 |
| gene-AT2C | 0.100263 | 0        | 0        | 0.095782 | 0.491889 | 0.380612 | 0        | 0        |
| gene-AT2C | 25.31823 | 25.15097 | 27.06115 | 13.04954 | 12.07308 | 14.70476 | 40.61045 | 42.25441 |
| gene-AT2C | 0.634173 | 0.341787 | 0.514702 | 1.00701  | 0.494498 | 0.556952 | 0.13297  | 0.457621 |
| gene-AT3C | 3.033535 | 2.736197 | 2.595776 | 2.851603 | 3.999405 | 3.419984 | 0.318268 | 0.432858 |
| gene-AT5C | 9.718136 | 8.974833 | 8.222258 | 19.59417 | 17.33156 | 18.38084 | 1.518488 | 1.861541 |
| gene-AT2C | 1.302481 | 1.278938 | 2.057869 | 2.459559 | 2.077584 | 1.889102 | 1.035981 | 1.528515 |
| gene-AT3C | 0.958522 | 0.673106 | 0.830517 | 1.16076  | 1.249981 | 1.315611 | 1.77088  | 1.478863 |
| gene-AT5C | 7.943921 | 5.483329 | 7.706334 | 7.604157 | 7.756448 | 8.077418 | 4.141374 | 3.821561 |
| gene-AT5C | 2.594165 | 3.067593 | 3.095755 | 3.245748 | 2.751425 | 2.655116 | 2.031039 | 2.104406 |
| gene-AT3C | 3.321738 | 3.582877 | 3.192414 | 5.223549 | 4.162372 | 4.606421 | 1.256794 | 1.099672 |
| gene-AT3C | 0.99647  | 0.878995 | 0.80702  | 2.109634 | 1.847687 | 1.136878 | 2.948218 | 2.447245 |
| gene-AT5C | 2.642663 | 2.730886 | 2.784838 | 1.189078 | 1.824986 | 0.750253 | 0.550715 | 0.423343 |
| gene-AT1C | 2.307555 | 1.689378 | 2.994417 | 1.79776  | 1.430912 | 2.661873 | 4.794165 | 3.901882 |
| gene-AT1C | 2.835046 | 3.781213 | 2.945643 | 0.17274  | 0.533076 | 0.633381 | 5.529034 | 3.941758 |
| gene-AT1C | 3.561298 | 3.541343 | 3.155475 | 5.709797 | 5.096319 | 5.287361 | 2.033374 | 2.296116 |
| gene-AT5C | 24.75153 | 23.60052 | 23.08008 | 22.40373 | 20.43823 | 19.83306 | 21.23318 | 21.26008 |
| gene-AT3C | 4.973583 | 4.449895 | 5.52576  | 0.641524 | 0.804919 | 0.827471 | 7.358316 | 8.69054  |
| gene-AT5C | 3.619693 | 3.868266 | 4.122634 | 9.529368 | 7.855566 | 9.395716 | 0.304201 | 0.448926 |
| gene-AT5C | 1.281452 | 1.031452 | 1.914418 | 2.387806 | 2.508289 | 2.240157 | 2.840637 | 1.729367 |
| gene-AT2C | 2.176854 | 1.743194 | 1.398525 | 5.478888 | 4.768062 | 5.456438 | 0.40815  | 0.952698 |
| gene-AT1C | 0.602697 | 0.409243 | 0.697025 | 1.798445 | 1.214906 | 1.412661 | 0.346859 | 0.742163 |
| gene-AT5C | 1.213804 | 0.85093  | 1.031439 | 1.729923 | 2.167128 | 1.831983 | 0.965499 | 1.215621 |
| gene-AT1C | 1.024797 | 1.056192 | 1.515731 | 1.758674 | 1.702412 | 1.707462 | 0.712129 | 1.415614 |
| gene-AT1C | 1.245943 | 1.770145 | 1.109378 | 0.248323 | 0.081324 | 0.416975 | 3.195374 | 4.086457 |
| gene-AT5C | 9.260654 | 9.311557 | 9.997835 | 9.742653 | 9.54057  | 9.68316  | 8.654912 | 8.91502  |
| gene-AT4C | 0.444705 | 0.677925 | 0.925627 | 0.756706 | 0.851276 | 0.602517 | 0.713867 | 0.682342 |
| gene-AT2C | 10.67128 | 8.908705 | 11.93428 | 5.948015 | 6.888046 | 4.711785 | 9.702897 | 9.96455  |

|           |          |          |          |          |          |          |          |          |
|-----------|----------|----------|----------|----------|----------|----------|----------|----------|
| gene-AT1C | 13.41355 | 12.3315  | 12.88996 | 9.767647 | 11.66413 | 10.25106 | 16.08341 | 17.52027 |
| gene-AT1C | 34.89853 | 32.17175 | 33.79865 | 27.68894 | 28.01821 | 26.32584 | 12.22466 | 14.13432 |
| gene-AT3C | 8.586674 | 8.704355 | 7.311247 | 5.201452 | 5.537665 | 4.782026 | 14.03922 | 15.21746 |
| gene-AT3C | 26.218   | 24.18513 | 27.82752 | 20.72012 | 18.86104 | 21.60267 | 51.36368 | 46.46358 |
| gene-AT5C | 0.327332 | 0.653282 | 0.773958 | 5.343101 | 5.353586 | 6.350197 | 1.077395 | 1.76184  |
| gene-AT4C | 4.052149 | 3.560047 | 4.115698 | 3.310724 | 3.405395 | 3.047485 | 8.751881 | 10.13701 |
| gene-AT4C | 0.251002 | 0.108301 | 0.086601 | 0.090689 | 0.135404 | 0.275731 | 0.240641 | 0.387418 |
| gene-AT4C | 2.256866 | 1.201136 | 1.830629 | 4.870774 | 5.805203 | 4.975083 | 0.816779 | 0.604877 |
| gene-AT1C | 1.131972 | 1.188513 | 1.00315  | 0.417502 | 0.728088 | 0.417961 | 1.65641  | 1.418692 |
| gene-AT1C | 7.090067 | 7.621322 | 8.383284 | 5.32146  | 5.028581 | 6.340791 | 10.36654 | 10.34054 |
| gene-AT1C | 1.184923 | 0.811651 | 1.159505 | 1.962648 | 2.092642 | 1.627887 | 0.336414 | 0.525001 |
| gene-AT3C | 50.94414 | 49.6697  | 49.85878 | 43.33487 | 41.37145 | 39.3601  | 54.25002 | 57.61759 |
| gene-AT4C | 4.36782  | 4.8491   | 4.871893 | 2.741095 | 2.599679 | 3.657939 | 5.145491 | 5.682555 |
| gene-AT3C | 15.08486 | 13.79865 | 15.41199 | 19.7122  | 17.91672 | 20.13163 | 0.622204 | 0.804871 |
| gene-AT3C | 7.427963 | 10.3787  | 7.635456 | 8.349859 | 7.703297 | 7.976279 | 17.49293 | 18.26603 |
| gene-AT4C | 0.398989 | 0.593062 | 0.32592  | 0.939804 | 0.733633 | 0.83478  | 0        | 0        |
| gene-AT3C | 9.596597 | 8.364972 | 10.79462 | 4.917663 | 5.833594 | 5.548271 | 4.490135 | 3.612613 |
| gene-AT1C | 186.4226 | 182.0594 | 196.1346 | 241.585  | 240.6183 | 237.2682 | 56.26239 | 60.89753 |
| gene-AT4C | 2.211094 | 2.37605  | 2.288327 | 2.331868 | 1.842068 | 2.052118 | 1.071543 | 0.996816 |
| gene-AT5C | 17.55731 | 18.32138 | 18.47739 | 24.26983 | 24.99879 | 23.99861 | 21.41865 | 19.34081 |
| gene-AT1C | 0.938738 | 0.792471 | 0.482039 | 0.654964 | 0.521327 | 0.584789 | 0.224565 | 0.287073 |
| gene-AT1C | 4.330992 | 3.791674 | 5.080533 | 7.446202 | 5.939978 | 6.934178 | 2.241357 | 2.668801 |
| gene-AT5C | 0.530253 | 0.351058 | 0.292902 | 9.086822 | 7.909531 | 9.62802  | 0.294218 | 0.409323 |
| gene-AT5C | 17.50995 | 21.98974 | 19.31588 | 42.65319 | 43.88667 | 42.28657 | 22.3766  | 21.46948 |
| gene-AT5C | 17.62347 | 17.63103 | 17.54854 | 14.86474 | 13.46532 | 14.34264 | 18.07653 | 17.20062 |
| gene-AT2C | 2.175957 | 1.893254 | 1.715599 | 1.930888 | 1.912129 | 1.995187 | 0.6508   | 0.919099 |
| gene-AT3C | 11.63858 | 9.871181 | 11.27349 | 5.30346  | 5.166701 | 4.363619 | 24.40376 | 28.38667 |
| gene-AT3C | 12.82519 | 10.13954 | 12.69198 | 11.84788 | 13.67019 | 11.73032 | 4.157288 | 3.755106 |
| gene-AT3C | 8.037099 | 7.199688 | 7.829003 | 6.044436 | 5.483323 | 5.859132 | 8.317228 | 8.796145 |
| gene-AT5C | 27.36042 | 31.8091  | 29.55597 | 36.46979 | 38.84855 | 39.09077 | 20.59872 | 22.13405 |
| gene-AT4C | 4.331869 | 4.454101 | 6.777253 | 4.990536 | 4.258801 | 4.763703 | 5.989975 | 5.737805 |
| gene-AT3C | 1.523387 | 1.019175 | 1.117861 | 2.190049 | 2.079567 | 1.836913 | 0.777642 | 0.827703 |
| gene-AT5C | 81.06863 | 75.11679 | 78.32228 | 39.51976 | 37.8364  | 43.07914 | 152.8755 | 154.2469 |
| gene-AT2C | 4.481937 | 5.460845 | 4.826718 | 5.988187 | 5.661382 | 5.533855 | 2.815174 | 2.859749 |
| gene-AT1C | 0.709    | 0.726181 | 0.623073 | 1.223693 | 0.971393 | 1.321213 | 0.57846  | 0.468994 |
| gene-AT2C | 21.63752 | 20.67529 | 20.37886 | 7.821831 | 9.823702 | 7.627594 | 6.642854 | 6.339103 |
| gene-AT5C | 14.50644 | 13.88808 | 16.12912 | 6.682795 | 5.093115 | 5.183081 | 2.985055 | 2.951298 |
| gene-AT3C | 62.98929 | 64.62867 | 63.4475  | 62.1761  | 63.85658 | 57.17881 | 80.28106 | 70.02375 |
| gene-AT3C | 1.988108 | 2.270454 | 3.016939 | 4.253997 | 4.504516 | 4.158396 | 1.38884  | 1.084317 |
| gene-AT1C | 8.991961 | 8.81318  | 8.24697  | 8.032077 | 6.74965  | 7.503497 | 1.634471 | 1.740713 |
| gene-AT4C | 0.792483 | 0.345248 | 0.602989 | 2.719203 | 2.09472  | 3.472587 | 0.162524 | 0        |
| gene-AT5C | 5.099845 | 5.512328 | 6.066841 | 13.20334 | 14.08802 | 13.47759 | 5.009038 | 4.985481 |
| gene-AT4C | 8.325592 | 9.480002 | 8.475476 | 12.75929 | 14.43261 | 12.18938 | 2.219509 | 2.430477 |
| gene-AT1C | 3.739837 | 3.946938 | 2.827052 | 2.771599 | 2.013077 | 2.922075 | 9.907969 | 9.938235 |
| gene-AT4C | 0.941951 | 0.747831 | 1.450259 | 2.511065 | 1.712208 | 1.636339 | 3.547244 | 4.76403  |
| gene-AT1C | 26.13908 | 25.93339 | 24.26483 | 17.69435 | 17.33222 | 17.52834 | 35.14314 | 36.20462 |
| gene-AT4C | 12.9839  | 12.33914 | 12.6456  | 26.49134 | 27.69455 | 25.6088  | 18.38525 | 20.35968 |
| gene-AT2C | 7.108179 | 8.194627 | 6.059446 | 25.49311 | 25.48186 | 23.86795 | 2.154642 | 1.189906 |
| gene-AT1C | 4.609944 | 3.494871 | 3.533506 | 4.961094 | 4.421404 | 4.789659 | 2.409111 | 1.560593 |
| gene-AT1C | 9.829042 | 9.43658  | 8.913274 | 4.831247 | 4.734592 | 4.299196 | 4.437574 | 4.888423 |
| gene-AT2C | 169.3932 | 168.5978 | 174.7975 | 138.2558 | 142.1609 | 134.6765 | 148.4351 | 155.7436 |

|            |          |          |          |          |          |          |          |          |
|------------|----------|----------|----------|----------|----------|----------|----------|----------|
| gene-AT5C  | 5.295987 | 4.309025 | 5.029049 | 4.17275  | 4.786492 | 5.150418 | 5.872935 | 6.350876 |
| gene-AT4C  | 2.14845  | 2.132356 | 1.618732 | 1.592558 | 1.263035 | 1.087011 | 0.416536 | 0.332046 |
| gene-AT2C  | 6.271444 | 5.661541 | 5.209089 | 1.847338 | 1.757194 | 1.88642  | 2.779224 | 3.038212 |
| gene-AT4C  | 0.817329 | 0.666966 | 0.905261 | 1.589707 | 1.83394  | 1.65624  | 2.152188 | 2.083993 |
| gene-AT2C  | 27.57361 | 30.99139 | 25.75925 | 40.4215  | 38.88936 | 37.57775 | 89.75762 | 76.81698 |
| gene-AT1C  | 10.19257 | 11.92868 | 11.07781 | 8.678719 | 9.524264 | 10.18671 | 35.56672 | 35.84219 |
| gene-AT4C  | 187.4057 | 180.8028 | 192.7609 | 207.0614 | 200.4715 | 203.6682 | 80.6898  | 85.34295 |
| gene-AT2C  | 12.81114 | 15.93731 | 14.47394 | 29.66236 | 30.4641  | 28.92925 | 29.4766  | 31.92742 |
| Arabidopsi | 1.948361 | 2.057949 | 2.167517 | 2.340751 | 2.347494 | 2.881015 | 5.218045 | 4.413305 |
| gene-AT4C  | 508.1794 | 480.7704 | 499.0911 | 211.9368 | 203.6038 | 210.9056 | 759.6898 | 801.0813 |
| gene-AT3C  | 0.130753 | 0.248227 | 0.04034  | 0.594851 | 0.47739  | 0.438475 | 0.029825 | 0.024187 |
| gene-AT5C  | 10.19899 | 11.59721 | 10.82565 | 16.08978 | 15.55773 | 15.1047  | 3.922432 | 3.714984 |
| gene-AT3C  | 318.6598 | 308.8989 | 320.0756 | 243.229  | 244.7591 | 241.7981 | 216.5689 | 225.9436 |
| gene-AT5C  | 1.345306 | 1.389637 | 1.204037 | 1.556579 | 1.751875 | 1.80569  | 3.078768 | 3.236443 |
| gene-AT3C  | 2.740582 | 2.963161 | 3.592917 | 3.340269 | 3.778392 | 3.100708 | 6.038803 | 7.056911 |
| gene-AT3C  | 10.08167 | 8.434118 | 10.90493 | 4.328107 | 5.420827 | 6.945772 | 14.33039 | 16.06071 |
| gene-AT2C  | 6.105499 | 5.966798 | 6.979834 | 5.112864 | 5.055392 | 4.41941  | 4.202489 | 5.193044 |
| gene-AT3C  | 181.4177 | 174.6769 | 176.9916 | 132.4105 | 132.803  | 139.0679 | 319.8366 | 328.6649 |
| gene-AT1C  | 17.84626 | 16.2472  | 16.39993 | 1.750119 | 1.910684 | 0.857995 | 0.233834 | 0.579707 |
| gene-AT1C  | 13.63605 | 12.91078 | 13.28798 | 15.23692 | 15.52278 | 15.86399 | 4.281456 | 4.70004  |
| gene-AT3C  | 6.689657 | 6.526972 | 7.733145 | 6.218513 | 5.948871 | 6.591133 | 9.457308 | 9.526205 |
| gene-AT1C  | 6.024764 | 4.749005 | 6.053393 | 5.860938 | 7.105517 | 4.37834  | 3.064717 | 2.006913 |
| gene-AT2C  | 22.40427 | 24.1624  | 21.06262 | 106.6448 | 103.7326 | 102.7153 | 14.28221 | 13.04305 |
| gene-AT5C  | 16.87601 | 15.15676 | 16.01258 | 29.85947 | 29.33679 | 30.86462 | 5.222345 | 6.556566 |
| gene-AT1C  | 3.256579 | 2.507333 | 3.055873 | 3.362797 | 3.853958 | 2.876227 | 3.225648 | 3.797223 |
| gene-AT2C  | 7.753203 | 10.05296 | 8.709024 | 9.693734 | 8.962763 | 7.65408  | 3.407331 | 4.640431 |
| gene-AT1C  | 16.29281 | 16.30314 | 17.97881 | 10.51725 | 9.506148 | 10.20186 | 17.63134 | 18.514   |
| gene-AT5C  | 0.446459 | 0.205207 | 0.275611 | 0.342022 | 0.213654 | 0.197877 | 0.709906 | 0.582391 |
| gene-AT5C  | 2.264699 | 2.67337  | 2.984546 | 1.046593 | 0.787637 | 1.297715 | 1.18344  | 1.542496 |
| gene-AT4C  | 48.16391 | 49.43957 | 51.78505 | 31.42866 | 31.4359  | 33.33482 | 68.55973 | 72.23887 |
| gene-AT3C  | 22.01325 | 21.28268 | 21.91294 | 19.85228 | 17.70442 | 18.27852 | 34.54274 | 32.88873 |
| gene-AT1C  | 5.695692 | 4.582603 | 6.392154 | 6.596847 | 3.836151 | 5.755236 | 7.359668 | 7.768287 |
| gene-AT2C  | 141.5234 | 135.1384 | 142.0698 | 99.61468 | 99.54479 | 105.5032 | 187.9338 | 199.6408 |
| gene-AT1C  | 1.172061 | 1.401624 | 1.238334 | 2.063177 | 1.715934 | 2.073081 | 0.74484  | 1.029508 |
| gene-AT1C  | 0.284653 | 0.339499 | 0.37232  | 1.289293 | 0.94507  | 1.510801 | 0.384207 | 0.308593 |
| gene-AT4C  | 46.76201 | 44.90565 | 46.27625 | 32.67039 | 31.76422 | 36.06615 | 61.18765 | 52.72031 |
| gene-AT3C  | 11.55372 | 10.63229 | 10.32824 | 7.467881 | 6.738388 | 6.918339 | 5.06033  | 4.172719 |
| gene-AT5C  | 9.153141 | 8.535266 | 9.011758 | 6.748568 | 6.245941 | 6.410628 | 8.278468 | 8.70269  |
| gene-AT1C  | 3.210255 | 3.481923 | 2.425479 | 6.064552 | 6.2754   | 6.406875 | 2.259062 | 2.392596 |
| gene-AT1C  | 37.78991 | 41.1564  | 39.64695 | 23.34681 | 25.20221 | 22.69216 | 69.60812 | 70.33521 |
| gene-AT5C  | 5.244882 | 4.630074 | 4.665036 | 4.505937 | 4.127125 | 4.232418 | 1.921528 | 2.303387 |
| gene-AT5C  | 2.238685 | 2.568038 | 2.437629 | 1.860349 | 2.282595 | 2.035593 | 1.151907 | 1.123548 |
| gene-AT4C  | 1.212125 | 0.918739 | 0.806801 | 0.654721 | 0.269789 | 0.583336 | 0.506312 | 0.761302 |
| gene-AT2C  | 7.371099 | 7.545072 | 6.913481 | 12.63092 | 14.81032 | 13.62113 | 3.18151  | 4.634772 |
| gene-AT4C  | 1.23096  | 1.182153 | 1.257751 | 1.494458 | 1.71583  | 1.198623 | 2.276095 | 2.078683 |
| gene-AT3C  | 5.770435 | 6.026358 | 6.186535 | 5.399171 | 4.917001 | 5.277404 | 9.484384 | 12.29713 |
| gene-AT1C  | 9.225786 | 8.721218 | 8.044583 | 12.75635 | 11.21241 | 12.55755 | 2.75558  | 2.524791 |
| gene-AT3C  | 5.542539 | 5.366063 | 6.116373 | 3.623819 | 3.441409 | 3.701317 | 0.68628  | 0.748705 |
| gene-AT3C  | 27.07296 | 27.76686 | 29.83862 | 54.03109 | 46.52544 | 45.4913  | 42.39847 | 41.81849 |
| gene-AT2C  | 16.83211 | 16.76784 | 16.13195 | 39.61467 | 38.88817 | 37.81675 | 19.85547 | 20.87237 |
| gene-AT5C  | 56.97101 | 56.40542 | 56.40506 | 84.52098 | 85.37962 | 81.29714 | 51.28072 | 50.78845 |

|           |          |          |          |          |          |          |          |          |
|-----------|----------|----------|----------|----------|----------|----------|----------|----------|
| gene-AT5C | 0.52668  | 0.501821 | 0.760119 | 0.142381 | 0.223521 | 0.15895  | 2.060627 | 1.887929 |
| gene-AT2C | 593.1707 | 633.9581 | 569.991  | 697.3806 | 720.4486 | 715.4745 | 191.2337 | 178.2577 |
| gene-AT1C | 2.514315 | 2.69615  | 3.436979 | 0.233487 | 0.468759 | 0.350066 | 1.356213 | 1.229521 |
| gene-AT1C | 55.50875 | 55.6849  | 56.85916 | 24.03271 | 24.57342 | 25.3601  | 49.82859 | 52.67369 |
| gene-AT2C | 1.263314 | 1.120528 | 0.859284 | 0.938375 | 0.914911 | 1.175162 | 1.817876 | 1.668548 |
| gene-AT5C | 43.25575 | 43.02736 | 43.25293 | 18.38249 | 17.01139 | 17.11017 | 53.7064  | 58.30309 |
| gene-AT1C | 0.405074 | 0.388523 | 0.755586 | 1.697517 | 1.061352 | 1.182087 | 0.28391  | 0.540126 |
| gene-AT5C | 11.4899  | 11.08102 | 12.82616 | 8.010594 | 6.282203 | 8.457033 | 3.924702 | 3.113362 |
| gene-AT4C | 1.088505 | 1.469924 | 1.049365 | 3.111762 | 2.59574  | 2.933925 | 1.802272 | 1.942972 |
| gene-AT4C | 0.61088  | 0.666123 | 0.629686 | 0.336886 | 0.357481 | 1.023122 | 2.705879 | 3.102018 |
| gene-AT5C | 7.594293 | 7.518038 | 8.402135 | 9.582229 | 9.134199 | 7.240177 | 10.26909 | 10.17084 |
| gene-AT2C | 8.711866 | 11.88801 | 8.434311 | 5.039734 | 7.105601 | 6.631591 | 14.15033 | 12.19286 |
| gene-AT1C | 2.969496 | 3.110042 | 2.837127 | 3.729739 | 4.380796 | 3.528371 | 1.337708 | 1.244878 |
| gene-AT1C | 108.8958 | 104.6433 | 111.0746 | 71.98711 | 76.74001 | 80.79179 | 212.3427 | 205.4674 |
| gene-AT1C | 11.37768 | 8.172289 | 12.26656 | 15.53929 | 16.47154 | 16.74627 | 9.2412   | 11.55427 |
| gene-AT4C | 1.280161 | 1.26594  | 1.808827 | 0.863745 | 1.141583 | 0.796538 | 0.291757 | 0.57351  |
| gene-AT5C | 31.81969 | 29.54359 | 33.30639 | 36.46947 | 38.0232  | 36.3247  | 18.90433 | 18.35264 |
| gene-AT2C | 12.16573 | 12.63727 | 12.46006 | 9.932223 | 8.52875  | 9.174429 | 14.73257 | 13.98317 |
| gene-AT2C | 10.2044  | 9.26071  | 9.864287 | 7.807173 | 6.452712 | 6.743624 | 3.978659 | 3.283109 |
| gene-AT5C | 5.42164  | 6.008494 | 5.138493 | 1.809393 | 1.146935 | 1.854925 | 2.531307 | 1.946759 |
| gene-AT4C | 393.5683 | 387.2057 | 391.162  | 247.975  | 254.3546 | 254.5026 | 693.086  | 713.9662 |
| gene-AT3C | 2.895935 | 2.608656 | 3.284327 | 2.54085  | 3.353282 | 2.752561 | 2.098101 | 2.287455 |
| gene-AT4C | 2.798956 | 4.359305 | 4.188739 | 2.620938 | 2.009619 | 1.757097 | 3.045473 | 3.494601 |
| gene-AT5C | 1.242594 | 1.363185 | 1.596183 | 1.166283 | 0.880133 | 1.211437 | 0.666196 | 0.870307 |
| gene-AT1C | 0.815116 | 0.734664 | 0.55323  | 0.434073 | 0.600535 | 0.434771 | 0.265513 | 0.15242  |
| gene-AT5C | 10.5081  | 13.6643  | 12.04971 | 14.10417 | 13.36817 | 15.25673 | 3.632532 | 4.053451 |
| gene-AT4C | 6.202518 | 6.352314 | 7.473183 | 14.84227 | 15.34488 | 15.55504 | 6.894294 | 7.963682 |
| gene-AT3C | 0.977662 | 0.586489 | 0.819701 | 1.451768 | 1.415659 | 0.967817 | 0.488935 | 0.062055 |
| gene-AT1C | 4.889967 | 5.335342 | 5.251278 | 2.150175 | 1.947808 | 1.420046 | 2.184265 | 2.727854 |
| gene-AT1C | 26.55097 | 23.16639 | 23.75996 | 31.38915 | 29.5095  | 29.29322 | 13.61288 | 17.38656 |
| gene-AT2C | 0.938479 | 0.791028 | 0.727783 | 1.418353 | 1.082287 | 1.536123 | 0.414147 | 0.594187 |
| gene-AT4C | 4.973736 | 4.345222 | 4.568712 | 4.013014 | 5.898452 | 5.405182 | 2.274246 | 1.924307 |
| gene-AT3C | 4.718986 | 3.389894 | 5.451934 | 4.063922 | 4.146087 | 4.027137 | 6.030396 | 6.707941 |
| gene-AT1C | 13.43488 | 13.05409 | 12.65932 | 13.94484 | 14.81466 | 14.39465 | 23.06315 | 24.31491 |
| gene-AT5C | 97.75443 | 99.25418 | 96.85736 | 246.9372 | 263.3703 | 254.4807 | 94.82393 | 92.86291 |
| gene-AT5C | 60.82854 | 55.55257 | 62.87834 | 767.1424 | 768.4717 | 758.7737 | 27.04843 | 28.16661 |
| gene-AT3C | 201.4068 | 197.9741 | 195.124  | 143.8034 | 146.3523 | 141.4484 | 112.85   | 121.7113 |
| gene-AT1C | 3.695405 | 3.519627 | 4.135292 | 1.583249 | 3.008829 | 1.644918 | 4.594628 | 4.684337 |
| gene-AT4C | 26.32539 | 25.8366  | 26.0863  | 17.86724 | 17.65292 | 15.34171 | 27.5944  | 29.53663 |
| gene-AT1C | 11.7265  | 12.61209 | 11.08126 | 9.675028 | 8.039586 | 7.673226 | 8.919709 | 9.697661 |
| gene-AT4C | 7.198942 | 8.507484 | 7.202786 | 7.016198 | 6.792284 | 7.229691 | 10.37805 | 8.898339 |
| gene-AT3C | 9.075264 | 8.128616 | 8.683569 | 3.942866 | 3.761397 | 4.525714 | 8.179941 | 8.22438  |
| gene-AT1C | 34.83986 | 34.82306 | 34.8222  | 17.06959 | 16.74902 | 17.4869  | 49.34002 | 51.28876 |
| gene-AT1C | 85.78138 | 85.40963 | 87.5232  | 55.27663 | 57.26173 | 54.037   | 30.098   | 28.54018 |
| gene-AT3C | 50.86181 | 49.98787 | 44.90474 | 38.98116 | 42.38981 | 38.80267 | 111.7578 | 116.8525 |
| gene-AT5C | 3.413908 | 2.782738 | 2.678908 | 2.353122 | 2.045417 | 1.736754 | 3.24028  | 3.069195 |
| gene-AT5C | 0.394134 | 0.256899 | 0.618369 | 0.575596 | 0.673391 | 0.541088 | 0.363698 | 0.564854 |
| gene-AT4C | 7.151664 | 7.54699  | 6.934922 | 5.09821  | 4.345427 | 4.849399 | 5.644802 | 5.572786 |
| gene-AT5C | 553.5175 | 585.8576 | 556.3459 | 337.2715 | 328.8175 | 345.8366 | 232.3648 | 212.6206 |
| gene-AT1C | 43.42872 | 42.96955 | 43.27811 | 26.74761 | 27.42431 | 27.17169 | 47.45707 | 48.81217 |
| gene-AT3C | 152.9901 | 156.7897 | 153.366  | 87.15675 | 84.37656 | 79.98611 | 324.8445 | 348.4238 |

|            |          |          |          |          |          |          |          |          |
|------------|----------|----------|----------|----------|----------|----------|----------|----------|
| gene-AT5C  | 32.42505 | 29.15024 | 31.83452 | 27.95645 | 26.48523 | 29.61713 | 76.20808 | 73.90981 |
| gene-AT5C  | 6.850192 | 7.451398 | 6.950515 | 7.309177 | 8.360091 | 6.676193 | 2.372855 | 2.576612 |
| gene-AT4C  | 0.676508 | 0.397423 | 0.444084 | 0.846399 | 0.595531 | 0.604447 | 0.401018 | 0.550415 |
| gene-AT5C  | 93.2764  | 91.42622 | 90.10965 | 45.83875 | 51.92352 | 45.98566 | 106.1537 | 107.2797 |
| gene-AT2C  | 0.945713 | 0.950067 | 1.083561 | 1.615866 | 1.04328  | 1.07751  | 1.261476 | 1.904348 |
| gene-AT3C  | 2.127718 | 2.674243 | 2.300144 | 2.003018 | 0.933514 | 1.753827 | 0.253421 | 0.37635  |
| gene-AT1C  | 8.195279 | 8.308754 | 9.157183 | 7.213673 | 6.765354 | 7.470963 | 7.713804 | 8.647503 |
| gene-AT1C  | 21.41732 | 21.1792  | 22.46929 | 17.63465 | 18.98838 | 20.30652 | 37.47137 | 38.56188 |
| gene-AT1C  | 5.406598 | 4.092231 | 4.873382 | 2.994494 | 3.728994 | 3.083959 | 0.810816 | 1.226256 |
| gene-AT4C  | 0.306309 | 0.366971 | 0.122738 | 0.487686 | 0.252061 | 0.403578 | 1.695565 | 2.108458 |
| gene-AT2C  | 2.82765  | 2.811519 | 2.165684 | 3.675861 | 3.716034 | 3.44378  | 7.388427 | 7.746814 |
| gene-AT5C  | 0.98098  | 0.459862 | 0.268321 | 1.83145  | 1.828476 | 1.790565 | 1.64563  | 1.819534 |
| gene-AT4C  | 78.95309 | 79.45546 | 85.73266 | 85.26914 | 84.95794 | 83.34441 | 118.2639 | 121.4897 |
| gene-AT5C  | 0.260975 | 0.386418 | 0.230699 | 0.170723 | 0.050128 | 0.190582 | 0.272729 | 0.230716 |
| gene-AT5C  | 7.301877 | 8.674779 | 6.82682  | 15.14983 | 16.65733 | 15.33621 | 1.885    | 2.692443 |
| Arabidopsi | 6.549325 | 8.932432 | 8.445055 | 3.767677 | 4.346759 | 2.928849 | 5.601007 | 5.551952 |
| gene-AT3C  | 3.715677 | 3.355579 | 4.013483 | 2.262222 | 2.369653 | 2.72693  | 3.567094 | 2.850428 |
| gene-AT5C  | 22.00755 | 21.25757 | 20.67558 | 10.91826 | 12.45807 | 10.61178 | 8.575503 | 8.436154 |
| gene-AT5C  | 7.420532 | 7.787469 | 8.262166 | 3.337592 | 4.010686 | 3.348548 | 8.575844 | 8.700825 |
| gene-AT5C  | 2.934578 | 3.151285 | 2.835388 | 3.051439 | 3.124153 | 3.048383 | 2.288052 | 2.473595 |
| gene-AT5C  | 11.76466 | 9.626058 | 10.7136  | 11.28013 | 6.952291 | 7.65922  | 4.166624 | 4.92363  |
| gene-AT4C  | 37.70825 | 36.15517 | 37.71054 | 25.98199 | 22.13169 | 25.02562 | 28.75622 | 29.48722 |
| gene-AT1C  | 3.148078 | 4.579891 | 3.95512  | 4.612106 | 2.410866 | 3.8171   | 5.694708 | 5.497552 |
| gene-AT2C  | 285.9867 | 278.3918 | 282.1974 | 276.339  | 285.3572 | 267.9591 | 314.5426 | 314.756  |
| gene-AT5C  | 2.77036  | 3.145426 | 3.182387 | 13.4499  | 13.57654 | 14.23993 | 1.468565 | 1.807763 |
| gene-AT5C  | 11.33772 | 12.59455 | 9.6697   | 3.325442 | 3.334115 | 3.854355 | 5.238689 | 6.220051 |
| gene-AT1C  | 1.692516 | 1.176784 | 1.839802 | 0.389511 | 0.490189 | 0.433711 | 0.67276  | 0.354256 |
| gene-AT2C  | 27.9447  | 26.20449 | 24.93851 | 19.96142 | 19.83827 | 20.80038 | 15.02702 | 12.52352 |
| gene-AT1C  | 4.3285   | 4.572267 | 3.977465 | 10.3906  | 11.17489 | 9.325851 | 2.577595 | 3.054438 |
| gene-AT3C  | 17.62406 | 13.32684 | 13.4319  | 11.4199  | 11.59949 | 12.17593 | 24.08363 | 23.26474 |
| gene-AT1C  | 22.26676 | 22.26989 | 24.14543 | 15.52576 | 15.54653 | 14.4564  | 36.8308  | 38.8331  |
| gene-AT4C  | 26.26661 | 32.91092 | 27.36293 | 18.77298 | 20.74356 | 19.17703 | 40.36778 | 39.49392 |
| gene-AT1C  | 12.05821 | 12.32859 | 10.64338 | 11.08052 | 12.96001 | 11.44764 | 19.23224 | 18.37454 |
| gene-AT4C  | 15.071   | 14.28449 | 14.84143 | 9.927823 | 12.26048 | 9.041052 | 11.35128 | 12.8956  |
| gene-AT5C  | 0.393486 | 0.4848   | 1.244844 | 2.351776 | 3.57369  | 2.057029 | 0.64633  | 0        |
| gene-AT2C  | 0.660223 | 0.590374 | 0.7554   | 2.174987 | 2.527791 | 1.441926 | 1.69676  | 1.458554 |
| gene-AT5C  | 9.585134 | 9.84724  | 10.84217 | 8.622908 | 8.866881 | 8.086544 | 11.38062 | 12.49973 |
| gene-AT1C  | 0        | 0        | 0.363867 | 0.677454 | 0.439902 | 0.451135 | 0.193574 | 0.168868 |
| gene-AT3C  | 8.471147 | 9.208846 | 9.685924 | 74.97086 | 74.79652 | 73.82526 | 14.61669 | 15.22067 |
| gene-AT3C  | 205.1099 | 197.9423 | 206.9712 | 127.9745 | 131.5053 | 126.856  | 252.1492 | 266.0447 |
| gene-AT4C  | 4.646946 | 3.806311 | 3.896257 | 5.074598 | 4.46619  | 4.324202 | 2.614251 | 2.122417 |
| gene-AT1C  | 0        | 0        | 0        | 0.100519 | 0        | 0        | 0        | 0.057294 |
| gene-AT4C  | 0.68815  | 0.93776  | 1.471956 | 0.639358 | 0.436439 | 0.547958 | 1.813714 | 1.630264 |
| gene-AT1C  | 702.5119 | 669.5898 | 696.0471 | 419.9948 | 409.3784 | 412.2793 | 1116.578 | 1193.341 |
| gene-AT1C  | 22.24231 | 20.56628 | 21.29367 | 13.55405 | 14.07362 | 13.34963 | 8.170809 | 8.0123   |
| gene-AT1C  | 5.354123 | 4.005631 | 5.602963 | 6.964231 | 6.410426 | 7.429355 | 3.721756 | 3.993341 |
| gene-AT5C  | 44.07752 | 42.11455 | 47.33475 | 16.82802 | 18.65579 | 18.39808 | 56.88286 | 59.44391 |
| gene-AT3C  | 21.4378  | 19.13836 | 23.62885 | 10.01194 | 9.576089 | 9.885698 | 20.81804 | 22.41593 |
| gene-AT1C  | 0.591052 | 0.599569 | 0.421107 | 3.744879 | 1.919686 | 2.322817 | 0.264394 | 0.259128 |
| gene-AT4C  | 6.94099  | 8.510017 | 9.636808 | 5.691669 | 5.249088 | 5.503389 | 3.377783 | 2.96243  |
| gene-AT4C  | 29.58719 | 29.94894 | 31.59942 | 32.18868 | 30.54062 | 30.10552 | 15.58076 | 16.79139 |

|           |          |          |          |          |          |          |          |          |
|-----------|----------|----------|----------|----------|----------|----------|----------|----------|
| gene-AT5C | 2.775805 | 2.590717 | 2.750904 | 3.462041 | 3.32709  | 3.642375 | 1.00911  | 0.870175 |
| gene-AT3C | 2.044946 | 2.572987 | 1.995924 | 1.873085 | 2.217056 | 1.588396 | 5.792045 | 4.807067 |
| gene-AT2C | 44.54956 | 42.47392 | 46.42344 | 60.0515  | 52.11472 | 55.34595 | 26.43428 | 32.45168 |
| gene-AT3C | 75.94782 | 71.62656 | 76.23425 | 84.16465 | 83.94986 | 82.6443  | 35.89103 | 34.49867 |
| gene-AT3C | 1.901257 | 2.308016 | 2.153343 | 1.936101 | 3.593757 | 3.635733 | 6.116009 | 6.813862 |
| gene-AT1C | 2.403061 | 1.621968 | 1.400006 | 2.182055 | 2.426293 | 2.316043 | 0.351239 | 0.477505 |
| gene-AT5C | 1.891654 | 2.147606 | 2.842091 | 0.685509 | 0.588166 | 0.561174 | 0.990194 | 0.751111 |
| gene-AT4C | 6.592542 | 6.890909 | 7.459365 | 4.830308 | 4.797413 | 4.742849 | 1.36147  | 1.277704 |
| gene-AT1C | 38.89358 | 39.4026  | 40.84648 | 18.80418 | 19.40599 | 19.52504 | 40.07818 | 42.88645 |
| gene-AT1C | 43.81896 | 39.54353 | 40.72725 | 50.60836 | 50.21881 | 51.85263 | 21.76508 | 25.23433 |
| gene-AT5C | 287.0075 | 291.1013 | 282.5248 | 263.6865 | 275.0886 | 273.4799 | 505.8001 | 500.118  |
| gene-AT1C | 10.91736 | 9.315152 | 10.4493  | 10.48458 | 10.95471 | 8.803709 | 4.464069 | 4.503743 |
| gene-AT1C | 1.15385  | 1.091687 | 1.243155 | 2.158752 | 2.692933 | 1.819594 | 2.112234 | 2.843907 |
| gene-AT3C | 0.649214 | 1.304564 | 0.576043 | 0.954714 | 1.274979 | 1.04042  | 1.47139  | 1.477776 |
| gene-AT5C | 1.185731 | 1.508875 | 1.201343 | 1.135601 | 1.365949 | 1.089151 | 1.078865 | 1.32808  |
| gene-AT4C | 0.822648 | 1.318411 | 1.231003 | 2.420523 | 2.535914 | 2.411015 | 1.168203 | 2.020406 |
| gene-AT1C | 7.039706 | 6.601604 | 7.020572 | 7.289895 | 7.143253 | 6.748313 | 14.86615 | 15.7281  |
| gene-AT3C | 27.14263 | 26.94148 | 27.10724 | 18.87721 | 18.67084 | 17.67198 | 37.44297 | 38.18094 |
| gene-AT4C | 2.805953 | 2.570834 | 3.132932 | 1.24977  | 1.158404 | 1.773527 | 2.798941 | 2.470438 |
| gene-AT3C | 0.231141 | 0.066519 | 0.110197 | 0.414202 | 0.713073 | 0.65722  | 1.111132 | 2.115029 |
| gene-AT1C | 1.373698 | 0.855731 | 1.32995  | 2.438622 | 1.927484 | 2.740035 | 9.963064 | 9.529788 |
| gene-AT4C | 18.61602 | 17.09095 | 17.24654 | 25.54284 | 28.03068 | 26.79567 | 18.11034 | 17.98532 |
| gene-AT5C | 25.42143 | 22.90762 | 24.46335 | 20.03344 | 19.97338 | 19.34766 | 9.016477 | 10.29185 |
| gene-AT2C | 35.40497 | 40.5067  | 36.82348 | 14.41412 | 13.18722 | 14.2689  | 6.739546 | 6.34395  |
| gene-AT1C | 42.07431 | 36.4207  | 37.97441 | 49.52363 | 50.08045 | 49.76554 | 19.90533 | 20.16569 |
| gene-AT2C | 15.07881 | 16.26038 | 16.99027 | 21.56046 | 20.48111 | 20.38893 | 10.85401 | 9.952187 |
| gene-AT4C | 26.05326 | 25.51964 | 22.10257 | 22.91014 | 21.06546 | 26.44686 | 22.44034 | 24.79095 |
| gene-AT3C | 3.038422 | 3.001468 | 3.262692 | 2.618065 | 2.206713 | 2.575653 | 0.544071 | 0.433303 |
| gene-AT1C | 4.141635 | 3.893619 | 3.996923 | 3.257385 | 3.965169 | 2.773108 | 7.351997 | 7.852694 |
| gene-AT1C | 12.72817 | 15.25203 | 12.63796 | 19.07492 | 17.1842  | 18.28462 | 3.473119 | 3.717093 |
| gene-AT2C | 43.82428 | 42.00203 | 42.97673 | 22.28442 | 23.1024  | 22.59443 | 10.16237 | 9.71119  |
| gene-AT3C | 36.00752 | 36.31273 | 36.70157 | 20.77612 | 22.93535 | 21.56479 | 66.32127 | 65.98768 |
| gene-AT2C | 3.650363 | 2.802998 | 2.574606 | 2.336508 | 2.184665 | 1.973225 | 3.253731 | 3.691869 |
| gene-AT2C | 13.45735 | 13.50501 | 11.64831 | 13.3334  | 12.05345 | 13.46512 | 14.48562 | 12.8844  |
| gene-AT2C | 69.70615 | 71.84325 | 74.88941 | 83.42799 | 86.1564  | 85.40101 | 90.85455 | 90.58957 |
| gene-AT2C | 2.484889 | 2.844172 | 3.564903 | 3.777511 | 2.723182 | 3.469652 | 15.57215 | 13.46873 |
| gene-AT5C | 40.71595 | 42.13099 | 42.89902 | 71.81104 | 75.61068 | 72.58458 | 14.31455 | 15.28251 |
| gene-AT5C | 50.03247 | 51.16383 | 53.02052 | 45.13344 | 44.78381 | 43.25963 | 85.73254 | 92.1663  |
| gene-AT5C | 1.837651 | 1.990518 | 1.809835 | 1.784733 | 1.957938 | 1.21964  | 3.273491 | 4.29259  |
| gene-AT2C | 1.857274 | 1.359126 | 1.588462 | 0.929344 | 1.176849 | 0.924349 | 1.810642 | 2.301286 |
| gene-AT4C | 0.216502 | 0.135608 | 0.321021 | 1.725323 | 1.264702 | 2.050453 | 0.179717 | 0.076681 |
| gene-AT2C | 78.47482 | 78.68155 | 75.78902 | 55.3648  | 57.46593 | 57.91621 | 25.97594 | 26.08898 |
| gene-AT1C | 15.90332 | 15.79026 | 15.81682 | 15.74106 | 15.45947 | 14.99417 | 1.783018 | 2.156626 |
| gene-AT1C | 7.839858 | 6.347659 | 7.858739 | 2.465858 | 1.804405 | 1.85331  | 16.24665 | 15.00343 |
| gene-AT2C | 0.816958 | 0.841986 | 0.654292 | 1.728886 | 3.055193 | 1.712289 | 1.404475 | 2.790321 |
| gene-AT2C | 2.339399 | 2.493611 | 2.405401 | 1.441868 | 1.57128  | 1.443532 | 2.444648 | 2.561462 |
| gene-AT5C | 0.594651 | 0.658094 | 0.384872 | 1.100014 | 1.556989 | 1.502308 | 0.346652 | 0.354324 |
| gene-AT4C | 4.194774 | 4.429803 | 4.490737 | 6.029919 | 5.975991 | 5.936264 | 3.589571 | 2.859088 |
| gene-AT5C | 7.320452 | 7.039977 | 7.915662 | 10.65502 | 7.959759 | 8.775398 | 1.821689 | 1.840093 |
| gene-AT3C | 10.85851 | 10.37636 | 11.90208 | 30.85675 | 26.70193 | 25.21599 | 5.904886 | 6.880564 |
| gene-AT2C | 51.65539 | 48.67643 | 51.56215 | 41.10651 | 41.42882 | 42.94098 | 87.39896 | 97.05608 |



|           |          |          |          |          |          |          |          |          |
|-----------|----------|----------|----------|----------|----------|----------|----------|----------|
| gene-AT2C | 27.46589 | 26.38326 | 28.39838 | 26.68499 | 27.4117  | 27.36696 | 17.5543  | 18.73903 |
| gene-AT5C | 0.59661  | 1.139905 | 1.136372 | 0.640803 | 0.361123 | 0.467431 | 1.044257 | 1.182223 |
| gene-AT5C | 14.04328 | 15.82971 | 14.38839 | 13.1346  | 14.12352 | 13.86801 | 6.359438 | 6.300122 |
| gene-AT5C | 14.2555  | 12.7557  | 14.33071 | 10.14696 | 8.934272 | 9.757252 | 3.067029 | 3.768848 |
| gene-AT4C | 13.11891 | 13.08174 | 12.29834 | 5.541761 | 4.724149 | 4.69892  | 30.67723 | 30.09414 |
| gene-AT1C | 3.784163 | 3.116817 | 3.179082 | 1.946263 | 2.55086  | 2.659262 | 2.889841 | 4.113361 |
| gene-AT4C | 6.268249 | 6.047273 | 6.441272 | 3.799823 | 3.811483 | 3.76284  | 6.57995  | 7.29791  |
| gene-AT5C | 110.993  | 104.7279 | 111.7711 | 49.97875 | 47.09604 | 47.41253 | 102.7406 | 108.4516 |
| gene-AT2C | 131.4709 | 127.6645 | 135.0152 | 80.07467 | 75.21523 | 76.31004 | 54.76667 | 51.47558 |
| gene-AT1C | 2.089912 | 2.04002  | 2.208261 | 2.163993 | 2.049163 | 2.16159  | 2.636556 | 2.624023 |
| gene-AT1C | 1.073492 | 0.967186 | 0.946576 | 0.426024 | 0.552061 | 0.405815 | 0.510676 | 0.627074 |
| gene-AT1C | 1.577204 | 1.320193 | 1.204977 | 7.65611  | 8.353778 | 7.868818 | 1.845102 | 1.709052 |
| gene-AT5C | 2.015291 | 1.508038 | 1.438194 | 1.436442 | 1.859919 | 1.127288 | 1.306987 | 1.800101 |
| gene-AT4C | 126.6708 | 124.5849 | 120.8972 | 23.26182 | 25.54227 | 24.85074 | 8.467166 | 9.525462 |
| gene-AT3C | 66.66533 | 68.75584 | 66.76238 | 44.18115 | 45.02168 | 44.98699 | 27.93512 | 30.13988 |
| gene-AT5C | 1.898801 | 2.190206 | 1.710658 | 1.578019 | 1.386813 | 1.677775 | 1.096221 | 0.798523 |
| gene-AT5C | 0.576662 | 0.72722  | 0.613453 | 0.1176   | 0.123185 | 0.264489 | 0.302929 | 0.238472 |
| gene-AT5C | 6.828063 | 10.50009 | 8.965386 | 4.64025  | 4.681625 | 3.850703 | 7.536398 | 8.069187 |
| gene-AT1C | 6.810717 | 6.099645 | 7.167338 | 82.02398 | 79.71541 | 77.82015 | 4.905326 | 4.357438 |
| gene-AT5C | 11.88596 | 11.70259 | 12.25602 | 3.992474 | 4.587646 | 3.445567 | 5.087958 | 3.953654 |
| gene-AT1C | 2.39512  | 1.758501 | 1.87811  | 1.516564 | 1.588193 | 1.529069 | 0.730178 | 1.528528 |
| gene-AT5C | 1.788008 | 1.002161 | 1.097166 | 1.307247 | 1.861324 | 1.590813 | 0.356486 | 0.305078 |
| gene-AT3C | 26.18615 | 20.41015 | 25.61372 | 21.74207 | 20.7789  | 24.66555 | 20.79812 | 19.91653 |
| gene-AT3C | 21.04881 | 21.24113 | 20.78129 | 27.88769 | 27.1952  | 27.83572 | 13.84913 | 15.66309 |
| gene-AT1C | 12.11291 | 9.533608 | 9.536562 | 9.071539 | 7.2514   | 8.309142 | 14.54292 | 14.78237 |
| gene-AT3C | 14.94003 | 15.72406 | 15.24458 | 11.90416 | 12.74308 | 11.2102  | 12.41312 | 11.27394 |
| gene-AT2C | 0.751131 | 1.396207 | 0.772317 | 0.340524 | 0.567617 | 0.571659 | 0.454927 | 0.270902 |
| gene-AT5C | 15.41781 | 14.37446 | 12.81969 | 13.12026 | 11.86801 | 12.35081 | 19.74972 | 21.66017 |
| gene-AT1C | 3.539012 | 1.610489 | 2.296702 | 2.04505  | 1.606847 | 1.530446 | 1.186789 | 1.123723 |
| gene-AT5C | 4.579748 | 5.033725 | 5.183677 | 7.417937 | 7.236747 | 7.328125 | 7.447631 | 7.204317 |
| gene-AT4C | 4.812006 | 3.675076 | 3.444419 | 5.669042 | 6.475092 | 6.001861 | 1.888989 | 1.474871 |
| gene-AT1C | 8.631898 | 9.73058  | 7.92841  | 4.429794 | 3.928114 | 3.835085 | 8.018563 | 9.191567 |
| gene-AT3C | 5.580659 | 5.481649 | 5.063406 | 4.67489  | 3.882127 | 4.168849 | 6.067574 | 6.746562 |
| gene-AT5C | 2.255194 | 2.241221 | 3.085647 | 4.126739 | 5.204116 | 4.878732 | 3.181054 | 2.632391 |
| gene-AT4C | 5.498642 | 5.494679 | 5.25541  | 2.599532 | 3.707037 | 3.373272 | 2.079512 | 2.265899 |
| gene-AT3C | 23.9082  | 22.53543 | 21.86493 | 10.57902 | 12.34491 | 10.39712 | 18.87903 | 17.92286 |
| gene-AT1C | 250.601  | 252.0268 | 255.8392 | 568.679  | 557.0402 | 558.9466 | 195.153  | 192.8742 |
| gene-AT3C | 0.649011 | 0.603449 | 0.846299 | 3.319053 | 3.364859 | 3.424229 | 0.982011 | 1.596317 |
| gene-AT1C | 23.97068 | 24.31262 | 21.94123 | 41.45123 | 39.43733 | 41.77049 | 61.09903 | 63.77213 |
| gene-AT2C | 22.17785 | 22.59572 | 20.68123 | 6.827806 | 6.289672 | 7.451245 | 4.687202 | 6.320155 |
| gene-AT2C | 2.226025 | 2.095789 | 2.389565 | 1.787942 | 1.657048 | 2.332787 | 3.509339 | 2.865558 |
| gene-AT5C | 59.66742 | 53.00141 | 53.98917 | 46.28412 | 44.79161 | 47.29177 | 83.19965 | 73.77406 |
| gene-AT4C | 25.65331 | 25.30735 | 24.83127 | 12.47867 | 12.50455 | 12.75534 | 10.39848 | 11.37339 |
| gene-AT2C | 13.95917 | 13.89095 | 15.68873 | 2.454437 | 2.742348 | 2.60989  | 24.5511  | 23.32362 |
| gene-AT1C | 20.339   | 19.44846 | 19.81234 | 11.57374 | 11.69979 | 12.30662 | 18.46591 | 19.12333 |
| gene-AT2C | 9.547165 | 8.933185 | 9.460121 | 9.919818 | 7.574339 | 8.498017 | 10.20226 | 11.92205 |
| gene-AT4C | 5.50305  | 5.725559 | 6.130658 | 5.548976 | 4.412728 | 4.978645 | 7.325858 | 7.223853 |
| gene-AT3C | 0.806125 | 0.519108 | 0.923647 | 2.018693 | 2.136863 | 2.108314 | 0.706724 | 0.477895 |
| gene-AT3C | 8.723561 | 12.43294 | 9.863963 | 13.92007 | 14.30869 | 12.58791 | 7.421433 | 8.138559 |
| gene-AT4C | 18.54497 | 21.05917 | 20.84067 | 15.39509 | 16.38818 | 14.01163 | 28.16858 | 28.4897  |
| gene-AT3C | 202.4806 | 195.6892 | 192.5938 | 156.3709 | 149.7051 | 155.1268 | 345.6573 | 345.3178 |

|            |          |          |          |          |          |          |          |          |
|------------|----------|----------|----------|----------|----------|----------|----------|----------|
| gene-AT2C  | 486.8487 | 504.6586 | 490.3378 | 287.7987 | 297.0273 | 297.1335 | 511.4841 | 514.1794 |
| gene-AT1C  | 0        | 0        | 0        | 2.779858 | 3.41004  | 3.059069 | 0        | 0        |
| gene-AT1C  | 323.4728 | 329.2311 | 331.2281 | 166.9647 | 165.1837 | 161.5467 | 325.8629 | 368.2851 |
| gene-AT4C  | 7.860702 | 7.653942 | 9.113067 | 11.84677 | 11.98028 | 11.26963 | 10.40066 | 12.75314 |
| gene-AT1C  | 104.8718 | 104.3227 | 98.89188 | 108.8386 | 111.5935 | 107.8398 | 150.0131 | 152.5313 |
| gene-AT4C  | 66.44613 | 67.08328 | 69.52984 | 22.95031 | 23.85862 | 24.47234 | 5.504752 | 6.730219 |
| gene-AT4C  | 11.14844 | 9.504125 | 9.677442 | 6.083667 | 5.841701 | 5.922493 | 19.54494 | 18.65951 |
| gene-AT1C  | 1.095838 | 1.13113  | 0.878748 | 1.064181 | 1.414044 | 1.280918 | 0.237341 | 0.231011 |
| gene-AT2C  | 31.96037 | 32.48126 | 30.58181 | 84.6154  | 89.60526 | 89.56617 | 15.38915 | 13.64764 |
| gene-AT3C  | 14.03653 | 14.71108 | 13.21432 | 31.26434 | 29.97729 | 27.83241 | 18.74452 | 19.27795 |
| gene-AT2C  | 0.37633  | 0.441068 | 0.320717 | 0.397559 | 0.337427 | 0.256697 | 0.681725 | 0.440362 |
| gene-AT4C  | 2.816988 | 3.032235 | 2.018577 | 1.739936 | 1.635129 | 1.937502 | 0.79019  | 0.672613 |
| gene-AT3C  | 2.077738 | 2.908697 | 2.184832 | 1.55103  | 1.363437 | 1.585356 | 2.496941 | 3.209187 |
| gene-AT5C  | 5.156306 | 4.446056 | 5.078126 | 2.047542 | 1.560113 | 1.747308 | 4.909899 | 5.407246 |
| gene-AT5C  | 1.901412 | 1.52163  | 1.596158 | 1.703554 | 3.046577 | 3.109832 | 0.473147 | 1.037138 |
| gene-AT2C  | 18.86072 | 19.1349  | 17.88793 | 14.20849 | 13.3552  | 14.42402 | 4.072669 | 3.714054 |
| gene-AT4C  | 45.90744 | 45.54287 | 43.48405 | 22.95865 | 23.3102  | 25.76639 | 71.0974  | 75.89195 |
| gene-AT3C  | 2.233777 | 1.746484 | 1.796879 | 3.087573 | 2.808631 | 2.520594 | 0.931802 | 0.833424 |
| gene-AT2C  | 35.16359 | 33.71491 | 36.54714 | 27.5271  | 25.45741 | 24.62757 | 26.46233 | 25.85038 |
| gene-AT4C  | 34.73252 | 33.59222 | 39.51216 | 20.62197 | 18.21528 | 22.08308 | 62.07331 | 61.45787 |
| gene-AT5C  | 6.140587 | 4.484601 | 3.752541 | 1.463104 | 1.400074 | 2.402383 | 1.360168 | 2.317295 |
| gene-AT5C  | 188.5316 | 184.2844 | 187.0196 | 59.5284  | 56.04855 | 55.15339 | 299.2838 | 306.8987 |
| Arabidopsi | 1.109902 | 1.183867 | 1.751703 | 0.334905 | 0.64215  | 0.698869 | 1.509207 | 1.179819 |
| gene-AT2C  | 16.65673 | 16.34722 | 16.28663 | 14.49116 | 12.85363 | 14.38931 | 18.78315 | 20.20447 |
| gene-AT1C  | 15.12978 | 12.03234 | 12.75681 | 13.14002 | 11.90522 | 12.08739 | 16.93171 | 18.90215 |
| gene-AT1C  | 3.144183 | 3.030616 | 3.452054 | 5.44839  | 7.179812 | 5.718787 | 5.073962 | 5.371936 |
| gene-AT5C  | 2.853623 | 2.504781 | 2.841692 | 3.282957 | 3.52467  | 4.034392 | 4.61371  | 4.787603 |
| gene-AT4C  | 118.1853 | 114.2015 | 110.6722 | 72.97477 | 73.6488  | 71.46028 | 124.6477 | 120.3446 |
| gene-AT5C  | 1.592526 | 2.231442 | 2.259319 | 1.070192 | 1.831073 | 1.319331 | 0.535639 | 0.289427 |
| gene-AT3C  | 22.42987 | 22.82538 | 25.26558 | 38.15005 | 40.34722 | 37.46334 | 2.497069 | 2.98994  |
| gene-AT4C  | 25.85012 | 26.21646 | 24.60307 | 39.20918 | 42.45155 | 39.10497 | 13.09657 | 15.03105 |
| gene-AT1C  | 52.11104 | 53.31603 | 49.74387 | 26.55872 | 31.70707 | 26.17533 | 110.0435 | 117.2271 |
| gene-AT3C  | 1.573283 | 1.816147 | 1.361315 | 0.698768 | 0.835374 | 0.370216 | 0.831115 | 0.450401 |
| gene-AT1C  | 7.472223 | 7.156719 | 7.626026 | 6.880243 | 7.947882 | 7.370499 | 11.7186  | 13.1439  |
| gene-AT5C  | 3.841164 | 4.157549 | 5.015267 | 25.62303 | 23.43106 | 25.15102 | 24.95635 | 23.64042 |
| gene-AT1C  | 2.363476 | 2.129388 | 2.446878 | 8.076636 | 7.527936 | 9.300092 | 0.90249  | 0.956192 |
| gene-AT4C  | 4.111474 | 4.867227 | 5.553669 | 7.420231 | 8.676316 | 8.227556 | 5.232336 | 6.106188 |
| gene-AT3C  | 11.09865 | 13.48423 | 11.2045  | 11.42572 | 8.60717  | 10.73322 | 19.97076 | 15.21797 |
| gene-AT5C  | 5.36272  | 6.002793 | 5.83298  | 4.01867  | 4.866117 | 4.831274 | 9.699729 | 9.441188 |
| gene-AT1C  | 4.248587 | 4.345943 | 5.12326  | 1.59953  | 1.958245 | 2.029796 | 16.78206 | 17.55146 |
| gene-AT2C  | 6.260577 | 4.46831  | 5.731482 | 24.67665 | 26.25706 | 28.92304 | 1.525311 | 1.215853 |
| gene-AT4C  | 74.71053 | 79.74633 | 79.81768 | 25.66153 | 25.0395  | 25.06873 | 19.98676 | 19.73558 |
| gene-AT4C  | 1.01472  | 1.470593 | 0.785309 | 11.89205 | 11.31501 | 13.28879 | 0.138512 | 0.075742 |
| gene-AT4C  | 2.388817 | 1.683847 | 2.253797 | 9.013153 | 10.02772 | 9.037465 | 2.456983 | 1.45882  |
| gene-AT5C  | 250.7728 | 252.5476 | 266.0401 | 210.7546 | 214.065  | 210.6309 | 388.2112 | 401.0577 |
| gene-AT4C  | 11.34173 | 10.05886 | 11.16167 | 11.82127 | 10.52479 | 10.69912 | 16.14544 | 17.42094 |
| gene-AT4C  | 6.46474  | 6.58036  | 6.027769 | 12.27816 | 12.80117 | 12.53228 | 4.840546 | 5.26098  |
| gene-AT1C  | 2.211968 | 1.69571  | 2.616861 | 2.548739 | 2.759499 | 2.737919 | 2.225499 | 2.298097 |
| gene-AT3C  | 6.316603 | 6.20075  | 5.480138 | 6.86385  | 6.918749 | 5.658648 | 0.620155 | 0.250534 |
| gene-AT2C  | 0.294932 | 0.595961 | 1.033978 | 0.526993 | 0.26973  | 0.1587   | 0.135517 | 0        |
| gene-AT1C  | 68.89299 | 66.65496 | 69.70839 | 18.17261 | 17.38535 | 18.39943 | 4.247421 | 4.879215 |

|            |          |          |          |          |          |          |          |          |
|------------|----------|----------|----------|----------|----------|----------|----------|----------|
| gene-AT5C  | 3.530168 | 3.051427 | 3.697926 | 3.140755 | 3.456782 | 3.476028 | 4.13751  | 4.063075 |
| gene-AT4C  | 5.177982 | 6.166877 | 5.650045 | 8.290138 | 8.293538 | 7.549715 | 7.369969 | 7.62914  |
| gene-AT4C  | 0.262593 | 0.263887 | 0.133615 | 0.602759 | 0.843595 | 0.644257 | 0.433472 | 0.620065 |
| gene-AT3C  | 47.72594 | 46.79038 | 48.33335 | 42.26926 | 42.87826 | 42.75757 | 69.60742 | 68.79552 |
| gene-AT2C  | 1.21977  | 1.526939 | 1.860962 | 0.197758 | 0.229595 | 0.154506 | 0        | 0.078256 |
| gene-AT5C  | 6.035018 | 6.632192 | 6.320299 | 7.893302 | 7.705124 | 8.863069 | 9.529737 | 8.709586 |
| gene-AT1C  | 21.43486 | 18.21127 | 21.313   | 12.57411 | 11.70278 | 10.5801  | 37.77057 | 38.28431 |
| Arabidopsi | 1.871784 | 2.125191 | 1.850755 | 2.155624 | 2.28613  | 2.126138 | 7.0822   | 6.747365 |
| gene-AT1C  | 5.094067 | 5.128421 | 5.44401  | 12.47541 | 13.01986 | 13.72329 | 4.602223 | 4.872693 |
| gene-AT5C  | 33.38125 | 32.32384 | 32.90313 | 21.19168 | 20.46159 | 22.14157 | 47.03738 | 53.83567 |
| gene-AT2C  | 3.793751 | 3.801603 | 3.803607 | 4.186147 | 4.361149 | 4.052878 | 0.78699  | 0.691346 |
| gene-AT5C  | 7.914548 | 8.913617 | 9.476441 | 10.8863  | 12.51939 | 11.28902 | 8.470841 | 8.214351 |
| gene-AT5C  | 31.67942 | 31.00763 | 33.70773 | 32.75648 | 32.50646 | 31.65677 | 17.31539 | 17.44126 |
| gene-AT3C  | 8.144468 | 9.061061 | 9.284727 | 8.1269   | 9.493605 | 8.159341 | 3.795571 | 4.238265 |
| gene-AT5C  | 1.091008 | 0.984022 | 1.477363 | 1.011814 | 1.121698 | 1.621005 | 0.451841 | 0.462514 |
| gene-AT1C  | 11.84822 | 11.091   | 11.08697 | 7.904325 | 7.49862  | 7.174595 | 2.321298 | 2.362949 |
| gene-AT4C  | 5.283018 | 5.106333 | 5.167479 | 98.87278 | 96.858   | 98.28633 | 12.26152 | 9.903623 |
| Arabidopsi | 5.90163  | 6.215499 | 6.42776  | 8.071852 | 7.783888 | 10.42237 | 4.972008 | 4.077753 |
| gene-AT2C  | 4.979028 | 5.003747 | 4.67207  | 8.189206 | 9.532787 | 8.806257 | 2.746587 | 3.842818 |
| gene-AT1C  | 0.93537  | 0.499918 | 0.442232 | 1.375917 | 1.917065 | 1.842692 | 0.220301 | 0.311353 |
| gene-AT3C  | 121.1484 | 127.65   | 133.5195 | 93.16637 | 93.48879 | 93.93994 | 196.4723 | 212.123  |
| gene-AT1C  | 111.0375 | 106.9968 | 112.1615 | 70.41119 | 69.20375 | 67.07491 | 201.7659 | 206.3218 |
| gene-AT4C  | 5.372088 | 5.625555 | 6.594211 | 5.084756 | 4.165809 | 5.318105 | 2.718334 | 2.113004 |
| gene-AT4C  | 282.8201 | 279.5877 | 288.033  | 263.9877 | 272.8908 | 269.1577 | 426.481  | 432.4069 |
| gene-AT1C  | 7.274424 | 6.735817 | 7.426498 | 8.431539 | 8.388984 | 8.208851 | 6.239621 | 6.03882  |
| gene-AT5C  | 1.798363 | 1.828354 | 1.981298 | 0.717583 | 0.473018 | 0.385986 | 4.027767 | 3.395159 |
| gene-AT3C  | 2.350157 | 3.164001 | 2.546333 | 1.766844 | 1.279435 | 2.007435 | 1.017824 | 1.966958 |
| gene-AT5C  | 5.696599 | 5.3642   | 5.71769  | 9.075365 | 9.363498 | 10.13811 | 3.184225 | 2.61762  |
| gene-AT2C  | 13.50635 | 11.46153 | 12.34175 | 8.843963 | 8.984481 | 9.846888 | 16.85495 | 18.9335  |
| gene-AT2C  | 1.811164 | 1.479636 | 1.517963 | 0.852743 | 0.565766 | 0.748955 | 1.066804 | 0.790767 |
| gene-AT4C  | 18.88967 | 17.28778 | 18.24324 | 40.40739 | 39.23617 | 39.05961 | 5.368738 | 3.580604 |
| gene-AT4C  | 9.615475 | 9.718998 | 10.20377 | 7.525537 | 6.419964 | 7.157238 | 14.68066 | 17.3647  |
| gene-AT5C  | 2.386662 | 3.194095 | 2.807903 | 3.416495 | 3.311403 | 4.121852 | 9.963635 | 8.523088 |
| gene-AT4C  | 0.221524 | 0.128954 | 0.074734 | 0.631296 | 0.800158 | 0.479236 | 0.305854 | 0.166529 |
| gene-AT5C  | 7.470809 | 9.383261 | 8.439589 | 8.531563 | 7.106174 | 6.082716 | 3.153316 | 3.181622 |
| gene-AT1C  | 3.453971 | 2.75629  | 2.107042 | 3.024388 | 3.700559 | 4.086438 | 5.418639 | 6.121842 |
| gene-AT4C  | 4.353661 | 3.212215 | 4.035781 | 3.959737 | 4.779283 | 4.471865 | 2.195464 | 2.711937 |
| gene-AT1C  | 10.65901 | 10.25694 | 11.017   | 5.576982 | 4.097818 | 5.025438 | 28.3559  | 28.36324 |
| gene-AT1C  | 19.01243 | 20.70877 | 19.39999 | 25.43043 | 24.06218 | 24.1073  | 11.1943  | 8.402905 |
| gene-AT3C  | 15.36785 | 15.47554 | 14.92953 | 13.68494 | 12.55057 | 13.80184 | 20.21039 | 21.08367 |
| gene-AT3C  | 7.823161 | 9.201354 | 7.662362 | 1.653041 | 1.361246 | 1.502401 | 2.97028  | 2.377705 |
| gene-AT3C  | 64.33144 | 63.47558 | 63.118   | 72.5682  | 74.02844 | 77.57704 | 41.78951 | 44.17701 |
| gene-AT3C  | 0.637916 | 1.408761 | 0.945217 | 2.208311 | 2.651297 | 2.845339 | 0.456559 | 0.847798 |
| gene-AT3C  | 23.1909  | 22.61431 | 22.70368 | 9.794649 | 10.0526  | 10.66234 | 14.77297 | 13.6779  |
| gene-AT1C  | 1.698799 | 1.705902 | 1.592952 | 1.898552 | 1.125858 | 1.47705  | 3.293831 | 3.285643 |
| gene-AT4C  | 4.424666 | 3.662348 | 4.010057 | 3.76767  | 2.634575 | 2.414815 | 4.239787 | 4.843029 |
| gene-AT3C  | 2.318458 | 2.158312 | 2.317537 | 4.181225 | 4.079242 | 2.876874 | 1.702704 | 1.512512 |
| gene-AT1C  | 0.704047 | 1.125358 | 1.559511 | 1.477762 | 0.656668 | 1.109992 | 0.415987 | 0.288504 |
| gene-AT1C  | 26.04661 | 26.13106 | 24.71585 | 27.98838 | 26.15507 | 28.81964 | 27.8343  | 23.58163 |
| gene-AT2C  | 28.83634 | 30.56474 | 27.67822 | 36.37134 | 38.59996 | 35.90685 | 48.64288 | 49.90602 |
| gene-AT5C  | 1.594621 | 1.144442 | 2.066407 | 1.862806 | 1.357675 | 1.311196 | 0.870635 | 0.894395 |

|            |          |          |          |          |          |          |          |          |
|------------|----------|----------|----------|----------|----------|----------|----------|----------|
| gene-AT2C  | 8.190804 | 9.647985 | 8.489029 | 2.35605  | 2.221891 | 2.424138 | 27.82587 | 28.15549 |
| gene-AT1C  | 458.2351 | 446.7782 | 458.2618 | 751.6603 | 751.0892 | 747.7997 | 149.2495 | 156.496  |
| gene-AT1C  | 28.31691 | 23.37748 | 28.75877 | 23.5617  | 21.43227 | 22.52824 | 15.66027 | 17.46577 |
| gene-AT3C  | 136.2718 | 148.3766 | 145.2451 | 101.7706 | 99.61176 | 99.67873 | 42.90195 | 38.94584 |
| gene-AT5C  | 0.203044 | 0.167917 | 0.247538 | 0.024097 | 0.096849 | 0.143311 | 0.223882 | 0.364798 |
| gene-AT4C  | 29.02525 | 23.26177 | 26.4001  | 26.46166 | 29.00161 | 28.66705 | 2.53734  | 2.944127 |
| gene-AT3C  | 4.415587 | 6.367399 | 6.575173 | 4.924529 | 5.875652 | 3.212322 | 4.20341  | 4.359051 |
| gene-AT1C  | 4.646779 | 2.713994 | 3.905925 | 11.89519 | 10.46886 | 9.047571 | 3.420067 | 4.38388  |
| gene-AT4C  | 1.135175 | 1.367592 | 1.256646 | 1.349443 | 1.717446 | 1.249415 | 0.326977 | 0.262998 |
| gene-AT1C  | 14.26827 | 13.10549 | 13.67926 | 6.621777 | 6.740955 | 6.970368 | 4.097834 | 5.063425 |
| gene-AT4C  | 40.89679 | 40.63752 | 40.89056 | 27.63712 | 28.26045 | 30.15242 | 68.44115 | 67.2369  |
| gene-AT5C  | 0.574849 | 0.851083 | 1.016951 | 0.519798 | 0.617621 | 0.742122 | 5.406491 | 7.31106  |
| gene-AT1C  | 1.684069 | 2.504798 | 3.756913 | 4.588347 | 4.455461 | 4.753729 | 1.476165 | 1.471193 |
| gene-AT4C  | 8.271505 | 7.592609 | 9.892562 | 9.417098 | 9.361233 | 9.402946 | 5.809024 | 6.62715  |
| gene-AT5C  | 16.28957 | 13.39392 | 14.9078  | 11.40212 | 11.91159 | 12.06798 | 18.89052 | 18.53599 |
| gene-AT1C  | 7.245252 | 7.157885 | 7.069324 | 3.95889  | 4.688119 | 3.893968 | 5.676225 | 4.754974 |
| gene-AT2C  | 26.3036  | 27.73931 | 25.79502 | 163.8876 | 155.4524 | 144.1614 | 15.02345 | 16.33337 |
| gene-AT2C  | 2.771703 | 3.092646 | 3.391381 | 3.557552 | 4.203555 | 3.238626 | 1.060976 | 1.54373  |
| gene-AT1C  | 4.135508 | 3.991421 | 3.115787 | 3.169571 | 3.147265 | 3.721628 | 3.696731 | 3.320852 |
| gene-AT5C  | 2.837723 | 1.909971 | 2.484248 | 5.467309 | 5.671479 | 6.45442  | 2.771129 | 3.84445  |
| gene-AT5C  | 1.978858 | 1.835231 | 1.479791 | 7.474375 | 7.699846 | 7.896007 | 0.790085 | 0.707115 |
| gene-AT3C  | 13.4384  | 13.59511 | 14.31847 | 7.101212 | 7.160425 | 7.984362 | 16.93767 | 18.34048 |
| gene-AT2C  | 12.28885 | 10.09591 | 10.0598  | 7.830961 | 9.16591  | 8.744765 | 4.749249 | 3.465477 |
| gene-AT4C  | 6.928689 | 5.823987 | 4.651663 | 1.50797  | 1.711803 | 0.495744 | 3.240859 | 8.062498 |
| gene-AT4C  | 622.8212 | 640.2164 | 631.8339 | 355.8669 | 389.7267 | 383.4058 | 1063.435 | 1082.409 |
| gene-AT4C  | 3.283411 | 4.105579 | 4.860919 | 7.899558 | 9.98944  | 10.44513 | 6.763726 | 6.048541 |
| gene-AT4C  | 1.712861 | 1.721695 | 1.902982 | 1.500658 | 1.938383 | 1.802911 | 1.398787 | 1.177606 |
| gene-AT1C  | 4.52833  | 4.366778 | 3.870414 | 4.124713 | 4.133862 | 4.486451 | 2.07083  | 1.573106 |
| gene-AT3C  | 33.22624 | 33.97479 | 37.52228 | 59.97509 | 57.75672 | 59.48813 | 15.329   | 16.32093 |
| gene-AT1C  | 7.682538 | 8.653915 | 8.20437  | 20.00227 | 18.26451 | 17.10053 | 11.60791 | 12.31467 |
| gene-AT2C  | 8.844877 | 10.03686 | 9.694326 | 5.438433 | 5.601943 | 4.501744 | 16.74282 | 16.9432  |
| gene-AT5C  | 6.872358 | 6.640266 | 6.100419 | 7.719547 | 6.064911 | 6.327814 | 9.963552 | 10.298   |
| Arabidopsi | 0.541319 | 0.680144 | 0.98937  | 1.314156 | 1.466085 | 1.185846 | 0.545274 | 0.949532 |
| gene-AT1C  | 358.4529 | 358.2474 | 366.8236 | 268.0254 | 269.0735 | 254.4359 | 534.9987 | 554.9094 |
| gene-AT4C  | 31.11247 | 29.24152 | 32.5561  | 25.43303 | 20.93867 | 20.96751 | 41.7952  | 39.79049 |
| gene-AT5C  | 2.761978 | 3.330864 | 2.694345 | 1.413    | 1.804524 | 1.060781 | 2.634359 | 3.576472 |
| gene-AT5C  | 0.594281 | 0.623733 | 0.582368 | 1.120864 | 0.836755 | 1.165763 | 0.360617 | 0.33695  |
| gene-AT4C  | 1.786637 | 1.959597 | 1.725802 | 4.334448 | 5.144269 | 3.510516 | 2.395372 | 1.732349 |
| gene-AT4C  | 2.118342 | 4.953482 | 3.825081 | 1.798444 | 2.17057  | 1.665336 | 7.096878 | 7.450876 |
| gene-AT1C  | 213.7794 | 218.0533 | 224.1155 | 141.1928 | 135.9641 | 141.4732 | 247.7027 | 266.7157 |
| gene-AT2C  | 1.398285 | 0.825422 | 0.71582  | 2.70235  | 1.629642 | 1.764915 | 0.361412 | 0.95874  |
| gene-AT4C  | 12.01938 | 11.23928 | 11.80524 | 6.496417 | 6.277958 | 6.539624 | 4.928836 | 5.107484 |
| gene-AT1C  | 64.92559 | 61.10666 | 66.56719 | 58.30662 | 61.51929 | 56.7272  | 16.83311 | 19.69535 |
| gene-AT5C  | 7.067444 | 5.513059 | 5.774679 | 8.912262 | 10.04796 | 10.20382 | 7.239983 | 6.228504 |
| gene-AT4C  | 6.377855 | 6.65665  | 5.900602 | 7.552157 | 8.595538 | 7.360635 | 5.275912 | 5.039872 |
| gene-AT3C  | 0.571107 | 0.585881 | 0.504961 | 0.553821 | 0.490279 | 0.667889 | 0.303274 | 0.235848 |
| gene-AT1C  | 19.59906 | 17.84725 | 19.657   | 20.3158  | 18.90583 | 20.89888 | 9.884137 | 8.041697 |
| gene-AT4C  | 13.74159 | 13.6439  | 13.56319 | 8.847557 | 9.807501 | 9.473601 | 19.68947 | 20.85018 |
| gene-AT1C  | 7.434617 | 6.244826 | 6.878265 | 4.506966 | 2.750069 | 3.425373 | 7.248491 | 8.28121  |
| gene-AT3C  | 8.514397 | 10.41556 | 9.729172 | 10.28508 | 9.806995 | 9.84369  | 14.60633 | 14.02055 |
| gene-AT3C  | 28.23727 | 27.54331 | 29.75906 | 21.68763 | 22.8814  | 21.74353 | 27.69194 | 28.20733 |

|           |          |          |          |          |          |          |          |          |
|-----------|----------|----------|----------|----------|----------|----------|----------|----------|
| gene-AT5C | 7.144545 | 7.800162 | 7.190987 | 9.707823 | 10.77173 | 10.29338 | 4.444338 | 5.958603 |
| gene-AT4C | 1.009344 | 1.222013 | 1.043185 | 0.553746 | 0.27174  | 0.525391 | 0.182471 | 0        |
| gene-AT3C | 18.41722 | 15.1965  | 17.49356 | 22.44789 | 20.31593 | 20.54687 | 7.84218  | 8.275328 |
| gene-AT3C | 10.85882 | 10.78653 | 12.38416 | 7.036973 | 7.224443 | 8.226695 | 5.865643 | 6.215029 |
| gene-AT2C | 8.540883 | 8.298031 | 8.748816 | 10.42882 | 10.1229  | 10.94224 | 2.09832  | 2.733562 |
| gene-AT5C | 1.032507 | 1.395178 | 0.309954 | 2.810185 | 1.862206 | 2.033597 | 0.035749 | 0        |
| gene-AT4C | 7.817762 | 9.705667 | 6.567931 | 2.662873 | 3.171519 | 2.852937 | 13.17057 | 8.448701 |
| gene-AT4C | 3.037124 | 2.727307 | 3.398577 | 3.198283 | 4.679832 | 3.698714 | 10.02266 | 11.47773 |
| gene-AT4C | 41.22911 | 38.38759 | 36.47279 | 27.65377 | 32.18364 | 26.83942 | 11.80174 | 15.12921 |
| gene-AT4C | 1.217107 | 1.117023 | 0.82162  | 2.03765  | 1.629027 | 1.383946 | 1.240088 | 1.057335 |
| gene-AT4C | 2.377515 | 4.516411 | 2.111904 | 7.393082 | 5.031875 | 6.82281  | 0.477671 | 0.458399 |
| gene-AT4C | 168.7485 | 163.8059 | 165.9871 | 214.4858 | 205.2324 | 221.4674 | 43.83718 | 41.44075 |
| gene-AT3C | 1.502475 | 1.434011 | 1.06335  | 2.422778 | 2.061403 | 2.991937 | 0.933742 | 0.531088 |
| gene-AT4C | 0.818493 | 0.803301 | 0.310282 | 1.490832 | 2.393031 | 2.228404 | 0.309185 | 0.624907 |
| gene-AT3C | 12.95628 | 14.37203 | 15.04886 | 13.53951 | 10.2427  | 13.56452 | 20.65131 | 16.38725 |
| gene-AT3C | 1.785912 | 1.639294 | 1.134243 | 1.69992  | 1.202317 | 1.629954 | 1.600411 | 1.699932 |
| gene-AT5C | 6.008147 | 6.230202 | 5.17454  | 4.70816  | 5.294181 | 4.026188 | 11.82012 | 9.968648 |
| gene-AT1C | 0.935838 | 0.799966 | 0.693203 | 0.099272 | 0.198025 | 0.206044 | 0.078537 | 0.098664 |
| gene-AT2C | 1.848524 | 2.390628 | 2.293083 | 4.182813 | 3.765469 | 4.206744 | 1.322099 | 1.765679 |
| gene-AT5C | 14.85819 | 15.85046 | 16.56338 | 11.83118 | 11.05242 | 11.3799  | 23.15506 | 25.43801 |
| gene-AT3C | 10.4076  | 9.269794 | 9.001162 | 1.513065 | 1.001947 | 0.990539 | 10.13166 | 11.17474 |
| gene-AT4C | 2.28661  | 1.449126 | 2.355041 | 2.033661 | 2.535663 | 1.73703  | 2.692827 | 2.663613 |
| gene-AT1C | 8.865882 | 7.474808 | 7.623313 | 5.277213 | 4.611564 | 5.134411 | 2.175502 | 3.043152 |
| gene-AT3C | 2.236772 | 2.263507 | 2.120321 | 4.522082 | 3.929349 | 5.412301 | 4.332966 | 4.003025 |
| gene-AT1C | 6.218513 | 4.261085 | 4.501073 | 11.59019 | 11.13552 | 10.1765  | 6.225038 | 6.041478 |
| gene-AT1C | 4.23518  | 4.259611 | 4.687488 | 6.173196 | 5.27355  | 5.992128 | 2.969811 | 3.627186 |
| gene-AT3C | 22.51613 | 23.53504 | 25.68885 | 32.36472 | 32.62726 | 31.15336 | 44.32797 | 45.4012  |
| gene-AT2C | 82.10704 | 78.5423  | 80.683   | 26.03534 | 27.38654 | 26.27254 | 50.73264 | 62.0279  |
| gene-AT5C | 2.560848 | 3.028028 | 2.527242 | 2.901547 | 3.12053  | 2.969573 | 0.907826 | 0.931361 |
| gene-AT3C | 48.25798 | 47.11425 | 50.51275 | 24.18513 | 22.42719 | 22.69835 | 11.83081 | 12.03351 |
| gene-AT2C | 60.07057 | 58.98782 | 57.48765 | 44.63387 | 43.21164 | 43.85214 | 93.21395 | 88.89791 |
| gene-AT4C | 12.25487 | 11.36329 | 11.03994 | 10.20919 | 12.18657 | 10.38724 | 15.44116 | 18.69039 |
| gene-AT5C | 4.620623 | 4.223044 | 4.574829 | 3.26832  | 2.957156 | 3.932587 | 6.968391 | 7.311234 |
| gene-AT1C | 51.2737  | 48.97441 | 51.2757  | 46.39005 | 46.13219 | 46.78725 | 21.24295 | 21.71854 |
| gene-AT2C | 3.33732  | 3.71598  | 3.772607 | 4.95424  | 5.906963 | 5.486635 | 2.686635 | 2.641336 |
| gene-AT1C | 5.367619 | 3.997136 | 3.517849 | 7.573589 | 7.819316 | 7.244094 | 2.330022 | 2.332876 |
| gene-AT1C | 5.845741 | 6.145431 | 5.518935 | 4.192914 | 3.698782 | 4.896982 | 10.72643 | 10.77638 |
| gene-AT2C | 233.0298 | 223.9744 | 236.1328 | 180.9932 | 185.002  | 182.1247 | 326.5905 | 325.8627 |
| gene-AT1C | 5.79281  | 5.954589 | 5.692273 | 2.255334 | 2.018328 | 2.268905 | 0.628048 | 0.585453 |
| gene-AT2C | 31.84466 | 33.27559 | 32.70589 | 23.24156 | 21.47128 | 23.57278 | 43.80258 | 45.50962 |
| gene-AT1C | 21.85192 | 21.41581 | 16.34007 | 81.05843 | 76.50501 | 81.52277 | 13.07654 | 10.85276 |
| gene-AT1C | 37.70637 | 34.46536 | 34.69556 | 36.60394 | 35.73259 | 37.31815 | 9.387744 | 10.21951 |
| gene-AT2C | 0.891641 | 0.648996 | 0.944172 | 0.372598 | 0.415343 | 0.444186 | 1.736371 | 1.713498 |
| gene-AT2C | 0.103785 | 0.498246 | 0.107654 | 0.567541 | 0.430562 | 0.279055 | 0.209331 | 0.190534 |
| gene-AT1C | 188.477  | 175.3668 | 184.5479 | 200.3138 | 194.2678 | 197.8404 | 281.9019 | 277.6225 |
| gene-AT1C | 3.098948 | 2.939024 | 2.917403 | 6.315766 | 6.957201 | 7.110266 | 0.658341 | 0.832181 |
| gene-AT2C | 0.759377 | 0.865844 | 0.602865 | 0.792997 | 0.885797 | 0.850393 | 0.161757 | 0.037101 |
| gene-AT5C | 28.71629 | 28.99854 | 31.0737  | 16.89117 | 15.8814  | 15.62796 | 2.786984 | 3.484008 |
| gene-AT2C | 0        | 0.067692 | 0        | 0        | 0.053698 | 0        | 0.590882 | 0.67136  |
| gene-AT2C | 29.95431 | 34.39716 | 30.39257 | 60.98535 | 65.39481 | 63.85997 | 10.41157 | 9.806696 |
| gene-AT2C | 93.82856 | 94.83711 | 94.36205 | 29.5961  | 26.26535 | 28.05196 | 35.33756 | 34.58159 |

|            |          |          |          |          |          |          |          |          |
|------------|----------|----------|----------|----------|----------|----------|----------|----------|
| gene-AT1C  | 3.467162 | 3.765955 | 3.825422 | 3.293971 | 3.80882  | 3.042755 | 11.59607 | 11.26175 |
| gene-AT2C  | 19.85843 | 18.46491 | 20.89441 | 35.57116 | 35.45206 | 39.66097 | 13.67815 | 11.92175 |
| gene-AT2C  | 16.2307  | 15.02367 | 16.47828 | 8.17504  | 8.739504 | 8.991155 | 26.43274 | 25.4351  |
| gene-AT1C  | 2.064727 | 1.478572 | 1.108802 | 3.555649 | 3.72449  | 3.647604 | 1.223688 | 2.140593 |
| gene-AT5C  | 3.283951 | 2.539234 | 2.92765  | 6.809247 | 7.903676 | 6.254153 | 1.9476   | 1.514666 |
| Arabidopsi | 0.794311 | 1.230976 | 1.402257 | 0.027984 | 0        | 0        | 0.723799 | 0.541113 |
| gene-AT1C  | 0.822226 | 0.885602 | 1.120145 | 2.419093 | 1.996612 | 1.743268 | 2.58903  | 2.82174  |
| gene-AT4C  | 7.517337 | 6.053611 | 7.478913 | 6.738375 | 7.790586 | 6.63936  | 10.46118 | 10.68596 |
| gene-AT5C  | 176.3972 | 170.268  | 177.0697 | 196.5484 | 196.7449 | 199.7496 | 64.50772 | 67.28746 |
| gene-AT4C  | 13.34348 | 13.57804 | 13.22261 | 10.25494 | 10.68588 | 11.76521 | 2.998411 | 3.290214 |
| gene-AT4C  | 5.594442 | 5.433386 | 5.815259 | 12.79385 | 12.36586 | 12.12249 | 8.316771 | 7.525833 |
| gene-AT1C  | 3.696143 | 4.245108 | 3.483598 | 4.975021 | 5.227212 | 4.490936 | 1.564935 | 2.031933 |
| gene-AT5C  | 10.24955 | 10.11593 | 10.33876 | 7.247365 | 6.428988 | 5.456531 | 7.769338 | 8.0166   |
| gene-AT5C  | 1.43634  | 1.326054 | 1.608323 | 0.411478 | 1.18512  | 1.294444 | 1.813381 | 1.895185 |
| gene-AT2C  | 3.772552 | 3.741246 | 2.61944  | 2.956802 | 3.506484 | 3.749248 | 3.880361 | 4.468349 |
| gene-AT2C  | 2.500396 | 2.934966 | 2.575531 | 5.203524 | 4.779137 | 4.643587 | 5.05229  | 5.749812 |
| gene-AT5C  | 15.20116 | 14.09186 | 13.47652 | 10.71105 | 11.03328 | 11.09562 | 15.61633 | 17.07439 |
| gene-AT5C  | 2.719487 | 2.280352 | 3.625631 | 2.561533 | 1.665707 | 2.249043 | 3.169166 | 3.393054 |
| gene-AT5C  | 159.8438 | 152.8228 | 156.8804 | 123.7255 | 128.652  | 123.4028 | 173.1072 | 178.9309 |
| gene-AT1C  | 2.946711 | 2.880455 | 2.392413 | 0.889475 | 0.189143 | 0.369555 | 3.551116 | 2.349592 |
| gene-AT3C  | 3.542274 | 4.01152  | 3.55734  | 5.572433 | 5.417047 | 5.036011 | 2.825199 | 3.032893 |
| gene-AT3C  | 9.7182   | 9.005819 | 9.521161 | 8.526007 | 8.56137  | 7.736502 | 11.231   | 10.62319 |
| gene-AT5C  | 17.16448 | 19.26835 | 17.3616  | 16.82478 | 17.61545 | 15.30698 | 7.743368 | 8.776134 |
| gene-AT1C  | 0.175851 | 0.984503 | 0.185696 | 0.085526 | 0.068673 | 0.381975 | 0.474227 | 0.584786 |
| gene-AT3C  | 19.13612 | 22.15379 | 19.93057 | 13.99595 | 16.16375 | 15.49022 | 14.36276 | 15.62545 |
| gene-AT2C  | 1.321228 | 0.946643 | 1.137582 | 0.603848 | 0.416002 | 0.309332 | 0.376141 | 0.511048 |
| gene-AT2C  | 40.53957 | 39.62243 | 40.46793 | 36.06447 | 32.1896  | 31.97506 | 44.15329 | 46.70551 |
| gene-AT3C  | 1.965655 | 2.434731 | 2.257322 | 2.340589 | 2.449963 | 2.323566 | 4.94953  | 4.823991 |
| gene-AT5C  | 0.847422 | 0.741954 | 0.599637 | 1.125351 | 0.845499 | 0.997079 | 0.307513 | 0.314233 |
| gene-AT5C  | 0.037397 | 0.074112 | 0.237701 | 0.029656 | 0.074498 | 0.022512 | 1.234914 | 0.977211 |
| gene-AT1C  | 5.587208 | 5.61987  | 5.382484 | 3.362241 | 3.23908  | 4.099429 | 5.322916 | 4.906001 |
| gene-AT1C  | 87.0774  | 88.85642 | 92.71472 | 34.05225 | 31.9095  | 32.36671 | 29.20861 | 33.53239 |
| gene-AT1C  | 4.134287 | 5.041272 | 4.270941 | 2.972536 | 2.59313  | 2.946204 | 3.057524 | 2.698323 |
| gene-AT1C  | 445.1768 | 430.9413 | 440.489  | 985.631  | 957.6326 | 971.6454 | 316.5109 | 317.3391 |
| gene-AT1C  | 3.104632 | 4.056136 | 3.113933 | 1.786749 | 0.915237 | 0.923008 | 4.441849 | 4.702384 |
| gene-AT1C  | 2.084898 | 2.993603 | 2.048927 | 1.233045 | 1.170891 | 0.797787 | 0.873017 | 0.934573 |
| gene-AT5C  | 1.516002 | 0.847185 | 2.055956 | 1.289863 | 1.047657 | 2.141018 | 4.666669 | 3.895711 |
| gene-AT1C  | 0.899764 | 0.83301  | 0.776393 | 0.942372 | 0.504947 | 0.605005 | 0.113515 | 0.176405 |
| gene-AT4C  | 8.181252 | 6.419017 | 6.745295 | 7.969815 | 8.397079 | 7.935984 | 3.661638 | 2.98665  |
| gene-AT3C  | 0.873014 | 0.7204   | 1.700516 | 0.724991 | 0.592205 | 0.846114 | 1.478304 | 1.093402 |
| gene-AT1C  | 1.070262 | 1.260118 | 1.173501 | 0.140568 | 0.265311 | 0.182477 | 0.605716 | 0.647737 |
| gene-AT3C  | 4.070027 | 4.81729  | 3.314959 | 3.399761 | 2.688957 | 2.138295 | 4.271276 | 5.040558 |
| gene-AT4C  | 66.15832 | 65.7333  | 63.50065 | 33.92686 | 34.52608 | 34.29285 | 29.51906 | 32.24602 |
| gene-AT3C  | 36.20098 | 39.42069 | 38.50736 | 25.71189 | 26.87993 | 26.30725 | 52.94597 | 51.88723 |
| gene-AT3C  | 18.24974 | 16.4353  | 16.30975 | 21.1422  | 19.94641 | 22.24992 | 46.39919 | 46.34517 |
| gene-AT3C  | 42.8539  | 43.64272 | 42.16119 | 50.79619 | 52.28928 | 51.17275 | 77.54417 | 81.38963 |
| gene-AT5C  | 6.020126 | 3.647046 | 5.163077 | 38.40849 | 36.49774 | 36.88893 | 0.595126 | 0.9696   |
| gene-AT5C  | 2.691452 | 2.572191 | 2.527314 | 1.359242 | 0.761433 | 0.826706 | 3.061132 | 3.864331 |
| gene-AT3C  | 4.563168 | 4.846808 | 5.329261 | 3.753743 | 4.476218 | 4.177675 | 5.071589 | 5.561901 |
| gene-AT5C  | 4.406582 | 4.343911 | 5.342494 | 2.79468  | 2.886079 | 3.059107 | 1.721622 | 1.517247 |
| gene-AT3C  | 1.679879 | 1.459354 | 0.980978 | 3.22363  | 2.94606  | 3.861945 | 0.93094  | 0.952179 |

|            |          |          |          |          |          |          |          |          |
|------------|----------|----------|----------|----------|----------|----------|----------|----------|
| gene-AT2C  | 6.466908 | 6.481484 | 6.019662 | 5.799829 | 7.534997 | 6.479714 | 6.969512 | 6.935371 |
| gene-AT1C  | 15.74634 | 18.69975 | 16.63131 | 16.8079  | 16.3995  | 16.06034 | 9.015794 | 8.193801 |
| gene-AT3C  | 415.1548 | 399.7083 | 408.2326 | 398.1898 | 388.1877 | 385.7686 | 554.2612 | 566.3421 |
| gene-AT5C  | 1.648528 | 1.533919 | 2.168767 | 0.34167  | 0.191411 | 0.400874 | 16.57035 | 16.17674 |
| gene-AT3C  | 0.592445 | 0.752111 | 0.899076 | 0.524112 | 0.461182 | 0.468513 | 1.306312 | 1.957704 |
| gene-AT5C  | 11.80263 | 11.35663 | 10.95625 | 8.423361 | 8.695651 | 9.421293 | 13.24205 | 12.53453 |
| gene-AT4C  | 8.344152 | 9.516745 | 8.496444 | 4.474306 | 4.738537 | 4.538152 | 3.99278  | 3.785737 |
| gene-AT3C  | 1.474129 | 0.80844  | 1.005166 | 1.012651 | 0.785544 | 1.181764 | 1.237056 | 1.920138 |
| gene-AT4C  | 0        | 0        | 0        | 0.484338 | 1.540108 | 1.064538 | 0        | 0        |
| gene-AT2C  | 13.85323 | 13.23913 | 13.81859 | 23.55486 | 22.50885 | 22.57579 | 7.830224 | 8.248515 |
| gene-AT4C  | 1.985089 | 1.753041 | 1.96476  | 0.679089 | 0.478059 | 0.550968 | 0.80188  | 1.035105 |
| gene-AT2C  | 3.59493  | 4.225387 | 3.512539 | 4.637097 | 4.397889 | 3.38782  | 3.770084 | 4.238087 |
| gene-AT2C  | 42.51808 | 43.62499 | 43.45909 | 71.21681 | 70.73487 | 74.13841 | 26.72636 | 26.45227 |
| gene-AT3C  | 4.993789 | 6.126592 | 5.575706 | 5.44438  | 5.358849 | 4.989724 | 3.307645 | 2.719214 |
| gene-AT5C  | 13.69659 | 12.83621 | 13.6159  | 6.548474 | 5.634732 | 6.239543 | 37.17566 | 39.28549 |
| gene-AT5C  | 6.3127   | 7.471562 | 7.435747 | 10.2221  | 13.83366 | 10.3444  | 3.884989 | 3.29928  |
| gene-AT5C  | 17.76481 | 17.44099 | 17.21755 | 14.84417 | 12.14578 | 12.37559 | 36.4752  | 40.54607 |
| gene-AT4C  | 27.80333 | 33.39496 | 32.22015 | 77.51981 | 78.14097 | 66.60058 | 32.58349 | 44.09573 |
| gene-AT1C  | 6.247694 | 7.622486 | 7.091761 | 7.580971 | 8.583973 | 8.842931 | 11.9603  | 11.94594 |
| gene-AT3C  | 9.467068 | 10.01468 | 10.49516 | 4.463962 | 5.568263 | 4.502343 | 17.89072 | 18.74282 |
| gene-AT1C  | 6.490771 | 7.637652 | 7.79484  | 0.598636 | 0.799685 | 1.197094 | 9.799952 | 9.918791 |
| Arabidopsi | 17.00545 | 17.90305 | 15.98075 | 11.19385 | 9.891441 | 11.28584 | 20.77778 | 16.49773 |
| gene-AT1C  | 3.244368 | 3.625345 | 3.736564 | 5.003217 | 4.930113 | 5.728285 | 5.826069 | 4.624413 |
| gene-AT1C  | 10.69533 | 10.78966 | 12.0775  | 11.74733 | 11.96021 | 12.24751 | 13.40325 | 13.47826 |
| gene-AT5C  | 138.9887 | 141.8365 | 142.5919 | 112.5436 | 116.1411 | 117.7922 | 263.285  | 262.4432 |
| gene-AT3C  | 3.670003 | 4.086669 | 3.416784 | 9.830582 | 11.23806 | 9.699633 | 1.99423  | 1.80259  |
| gene-AT5C  | 19.41152 | 18.06722 | 21.19226 | 18.85332 | 20.0491  | 18.35636 | 6.729456 | 5.08121  |
| Arabidopsi | 3.6544   | 3.934282 | 3.248858 | 1.883516 | 1.384641 | 1.612503 | 3.931153 | 4.224306 |
| gene-AT1C  | 31.51727 | 30.92916 | 32.71136 | 31.49149 | 32.65828 | 31.92098 | 49.31855 | 48.56574 |
| Arabidopsi | 9.132799 | 10.21668 | 11.8102  | 3.755518 | 4.704279 | 5.122048 | 2.576879 | 2.183942 |
| gene-AT1C  | 1.274637 | 0.839136 | 1.895095 | 5.239217 | 7.34553  | 6.298374 | 0.326906 | 0.359239 |
| gene-AT3C  | 1.025216 | 1.21396  | 0.924633 | 0.11374  | 0.144863 | 0.112259 | 0.927899 | 1.147798 |
| gene-AT2C  | 15.00334 | 10.63082 | 13.33991 | 5.012596 | 5.448524 | 3.499204 | 3.694066 | 4.655969 |
| gene-AT3C  | 134.4379 | 144.1755 | 136.3647 | 60.53059 | 60.85282 | 61.80856 | 125.3907 | 110.4782 |
| gene-AT1C  | 2.023342 | 1.962936 | 1.711605 | 2.254271 | 1.575685 | 1.664884 | 1.520743 | 2.138164 |
| gene-AT5C  | 12.92821 | 13.17375 | 12.95503 | 19.60714 | 19.84201 | 17.74859 | 10.21942 | 12.64529 |
| gene-AT5C  | 69.45402 | 69.45349 | 74.26929 | 85.48003 | 83.33553 | 86.81078 | 28.78204 | 30.38077 |
| gene-AT5C  | 3.157399 | 2.930531 | 4.485899 | 2.204773 | 2.444838 | 2.281378 | 0.993006 | 1.317082 |
| gene-AT2C  | 186.2325 | 179.8904 | 187.712  | 171.3915 | 173.8786 | 182.6655 | 131.9831 | 130.3811 |
| gene-AT1C  | 20.26767 | 22.68385 | 21.44719 | 34.43126 | 34.13303 | 32.30307 | 15.77288 | 17.46208 |
| gene-AT2C  | 0.552546 | 0.477065 | 0.3736   | 1.473505 | 1.197052 | 1.137781 | 0.873712 | 0.854674 |
| gene-AT3C  | 17.99097 | 17.47254 | 17.44281 | 23.59051 | 22.40424 | 23.93572 | 9.549763 | 9.349081 |
| gene-AT2C  | 1.597143 | 1.361451 | 2.03724  | 1.764817 | 0.981673 | 1.203246 | 0.33707  | 0.459143 |
| gene-AT5C  | 0.4653   | 0.59542  | 0.338504 | 2.419714 | 3.208174 | 2.893252 | 0.347542 | 0.369513 |
| gene-AT5C  | 0.544857 | 0.523166 | 0.50192  | 0.157165 | 0.258346 | 0.241193 | 0.335669 | 0.609739 |
| gene-AT1C  | 1.681928 | 1.497646 | 2.181928 | 1.29136  | 0.423917 | 0.881448 | 1.737825 | 1.981874 |
| gene-AT2C  | 0.473761 | 0.284742 | 0.700331 | 1.341598 | 1.131727 | 1.435575 | 0.490521 | 0.422708 |
| gene-AT3C  | 1.6995   | 1.792072 | 0.875781 | 3.056815 | 2.379232 | 4.288148 | 1.406179 | 1.98627  |
| gene-AT5C  | 4.251308 | 4.009665 | 4.079594 | 1.734321 | 1.928374 | 1.685301 | 2.33257  | 2.466098 |
| gene-AT1C  | 0.167177 | 0.167832 | 0.10558  | 0.181571 | 0.205018 | 0.149419 | 0.282193 | 0.043496 |
| gene-AT5C  | 10.88754 | 11.13424 | 12.25677 | 17.10153 | 18.50793 | 17.9228  | 8.271492 | 9.656827 |

|           |          |          |          |          |          |          |          |          |
|-----------|----------|----------|----------|----------|----------|----------|----------|----------|
| gene-AT5C | 1.349871 | 1.095096 | 1.684003 | 1.095016 | 1.596593 | 1.834002 | 3.656831 | 3.381493 |
| gene-AT1C | 169.6076 | 171.2474 | 176.6479 | 102.1494 | 96.54483 | 89.21995 | 312.0752 | 323.5804 |
| gene-AT2C | 1.195278 | 0.619231 | 0.523723 | 2.659328 | 2.906656 | 2.491639 | 0.215302 | 0.475594 |
| gene-AT1C | 33.65359 | 30.10875 | 29.29209 | 35.51968 | 36.86293 | 36.79644 | 36.21834 | 38.21366 |
| gene-AT1C | 66.00046 | 63.84617 | 67.10381 | 41.52073 | 44.45665 | 45.37865 | 112.1078 | 108.9826 |
| gene-AT1C | 4.11021  | 3.308956 | 4.137216 | 5.020109 | 5.175699 | 6.720569 | 8.78698  | 8.51306  |
| gene-AT1C | 4.396026 | 4.259483 | 4.357162 | 0.23367  | 0.37734  | 0.263631 | 0.033412 | 0.069014 |
| gene-AT1C | 4.76627  | 5.488914 | 5.377612 | 6.612664 | 6.632215 | 7.401452 | 1.676593 | 2.423652 |
| gene-AT2C | 0.199345 | 0.097479 | 0.229341 | 0.628896 | 0.561385 | 0.57158  | 0.245251 | 0.27975  |
| gene-AT1C | 2.722265 | 2.445904 | 2.742803 | 2.603837 | 2.259308 | 2.708188 | 0.245297 | 0.231414 |
| gene-AT1C | 4.164057 | 3.286568 | 3.626179 | 4.244204 | 4.214323 | 4.219079 | 3.443858 | 3.554738 |
| gene-AT3C | 3.348191 | 2.802512 | 3.409667 | 1.50985  | 1.878171 | 2.236683 | 5.451135 | 5.64468  |
| gene-AT4C | 80.95054 | 76.85048 | 79.61454 | 51.81284 | 50.38429 | 51.57879 | 145.2952 | 150.5057 |
| gene-AT3C | 468.7184 | 467.9968 | 468.4949 | 390.3054 | 390.3909 | 383.3127 | 162.4161 | 173.7691 |
| gene-AT2C | 3.13483  | 2.742426 | 3.230357 | 6.329285 | 7.466006 | 6.325021 | 2.738765 | 2.503571 |
| gene-AT1C | 0.400481 | 0.516801 | 1.038674 | 2.30449  | 2.557774 | 2.418475 | 1.11571  | 0.813697 |
| gene-AT3C | 24.80135 | 32.61914 | 22.93741 | 63.90727 | 55.8848  | 63.10365 | 25.36676 | 26.09406 |
| gene-AT4C | 39.64875 | 37.94927 | 37.02619 | 27.05563 | 26.62369 | 26.6914  | 3.317944 | 2.289966 |
| gene-AT3C | 1.375181 | 1.683467 | 1.494893 | 1.849609 | 1.329243 | 1.57558  | 1.238718 | 1.102436 |
| gene-AT1C | 973.6938 | 948.7407 | 979.0559 | 508.6818 | 504.722  | 514.3302 | 1465.607 | 1479.082 |
| gene-AT5C | 5.812327 | 5.081198 | 5.893431 | 7.482066 | 6.850754 | 6.683289 | 8.083688 | 7.331299 |
| gene-AT3C | 1.592548 | 1.209808 | 0.735451 | 1.059217 | 1.373808 | 0.409799 | 0.989118 | 1.111328 |
| gene-AT5C | 1.633324 | 2.032389 | 1.863665 | 3.580167 | 4.382683 | 3.434522 | 1.126343 | 0.71554  |
| gene-AT1C | 1.596245 | 1.49431  | 1.748169 | 1.238734 | 0.896507 | 1.116482 | 2.171328 | 1.887593 |
| gene-AT3C | 6.378996 | 7.470324 | 5.575267 | 4.059258 | 3.871104 | 3.845459 | 1.561304 | 1.453697 |
| gene-AT5C | 0.209874 | 0.534605 | 0.274654 | 1.025532 | 0.885774 | 0.869701 | 0.234727 | 0.453782 |
| gene-AT3C | 0.479314 | 0.486381 | 0.633331 | 1.032137 | 0.851015 | 0.775413 | 1.318316 | 1.152202 |
| gene-AT1C | 10.59983 | 10.98787 | 11.14146 | 13.32951 | 13.2351  | 14.53183 | 4.860627 | 4.413666 |
| gene-AT1C | 29.65927 | 30.67188 | 28.02357 | 11.59556 | 16.40334 | 12.1539  | 13.61321 | 11.77608 |
| gene-AT4C | 3.239744 | 3.463988 | 3.116633 | 1.024651 | 0.945691 | 1.35552  | 2.189706 | 3.046739 |
| gene-AT1C | 11.69585 | 11.11782 | 10.44215 | 4.861361 | 4.083698 | 4.551991 | 20.55169 | 21.30781 |
| gene-AT1C | 1.426533 | 1.167494 | 1.170687 | 0.835714 | 1.015147 | 0.845675 | 0.491109 | 0.428079 |
| gene-AT5C | 28.2216  | 22.71119 | 19.41279 | 28.88015 | 29.23617 | 33.09408 | 11.24204 | 10.86551 |
| gene-AT5C | 161.9352 | 166.7113 | 163.4677 | 185.8718 | 189.7034 | 186.5527 | 39.20775 | 41.84509 |
| gene-AT4C | 31.85168 | 29.20672 | 25.252   | 30.52133 | 28.31475 | 33.15112 | 11.63563 | 11.43017 |
| gene-AT5C | 15.0111  | 18.34782 | 17.5735  | 13.5299  | 16.09294 | 14.15991 | 31.10638 | 34.01067 |
| gene-AT5C | 0.618307 | 0.998653 | 0.593781 | 1.383877 | 1.79428  | 2.30592  | 1.056105 | 0.825892 |
| gene-AT4C | 1.343238 | 1.233773 | 0.847442 | 0.996892 | 2.316529 | 1.521558 | 0.207713 | 0.526828 |
| gene-AT4C | 41.81568 | 37.74522 | 39.26759 | 32.56889 | 35.03808 | 33.24144 | 53.00228 | 53.1861  |
| gene-AT3C | 8.046    | 10.13762 | 10.19431 | 7.280523 | 6.118982 | 6.019732 | 15.54287 | 14.80927 |
| gene-AT4C | 13.42614 | 11.11673 | 10.24386 | 11.42927 | 12.55383 | 12.16473 | 4.963765 | 5.381361 |
| gene-AT2C | 4.255393 | 3.958128 | 3.569564 | 1.730289 | 2.365376 | 2.20638  | 1.386025 | 1.634469 |
| gene-AT5C | 9.044201 | 10.59189 | 10.53527 | 22.62028 | 24.16929 | 24.57293 | 8.623355 | 7.749855 |
| gene-AT2C | 1.552454 | 2.271206 | 1.582073 | 1.379858 | 1.623394 | 1.243108 | 1.239417 | 1.462656 |
| gene-AT3C | 1.142627 | 1.122676 | 1.24807  | 0.85113  | 0.444656 | 0.328811 | 3.028653 | 3.473997 |
| gene-AT2C | 5.466859 | 6.109047 | 6.873452 | 6.174033 | 5.381189 | 5.665988 | 11.28268 | 13.20236 |
| gene-AT3C | 3.589666 | 4.115014 | 3.278818 | 3.60503  | 3.989901 | 4.037154 | 4.25837  | 4.326303 |
| gene-AT4C | 3.784111 | 2.865013 | 4.558621 | 7.09796  | 7.101878 | 7.637899 | 8.44151  | 6.78455  |
| gene-AT5C | 100.3769 | 99.44634 | 100.2322 | 102.4296 | 98.72772 | 104.353  | 71.26267 | 73.11909 |
| gene-AT2C | 4.176521 | 3.672318 | 5.135166 | 5.569871 | 6.484998 | 6.736072 | 1.646874 | 1.94897  |
| gene-AT4C | 3.838726 | 3.687141 | 3.791954 | 2.022988 | 2.695654 | 1.933252 | 7.355618 | 9.443129 |



|            |          |          |          |          |          |          |          |          |
|------------|----------|----------|----------|----------|----------|----------|----------|----------|
| gene-AT1C  | 9.295728 | 9.751688 | 9.056006 | 7.672778 | 5.852081 | 7.036728 | 21.10569 | 22.17709 |
| gene-AT4C  | 15.54456 | 15.23146 | 17.95355 | 6.077801 | 5.877729 | 5.240867 | 15.56548 | 17.93598 |
| gene-AT1C  | 8.907212 | 8.990154 | 10.48623 | 6.866292 | 7.432262 | 6.634063 | 10.41738 | 10.8913  |
| gene-AT5C  | 73.61517 | 78.45817 | 74.31714 | 28.1073  | 25.1009  | 27.81859 | 97.32585 | 89.6715  |
| gene-AT3C  | 1.827929 | 1.343923 | 1.370439 | 0.73416  | 0.566862 | 0.873544 | 0.820319 | 0.249374 |
| gene-AT2C  | 0        | 0.156777 | 0.091961 | 0.630833 | 0.703963 | 0.499566 | 0.898096 | 0.962036 |
| gene-AT2C  | 7.284722 | 7.907005 | 7.165274 | 2.879448 | 3.869164 | 3.744683 | 6.182796 | 5.126879 |
| gene-AT1C  | 22.08273 | 22.65411 | 22.44421 | 20.31753 | 21.67966 | 19.50244 | 26.62118 | 28.25651 |
| gene-AT4C  | 106.6807 | 105.1658 | 108.0467 | 61.53245 | 61.47111 | 61.17031 | 103.5413 | 108.1939 |
| gene-AT4C  | 35.05796 | 33.19468 | 33.92032 | 29.79588 | 29.19277 | 28.71248 | 46.1381  | 50.79302 |
| gene-AT2C  | 26.67289 | 28.87682 | 27.29981 | 23.10757 | 20.90717 | 20.27137 | 44.95419 | 41.89666 |
| gene-AT1C  | 22.77224 | 23.56894 | 24.28329 | 23.70714 | 23.82628 | 23.22617 | 13.75457 | 14.03005 |
| gene-AT1C  | 1.574673 | 1.621181 | 1.657829 | 0.458142 | 0.839566 | 0.662235 | 3.281584 | 5.186144 |
| gene-AT2C  | 4.953863 | 4.892131 | 5.26696  | 6.794347 | 6.92259  | 8.437451 | 2.397355 | 2.337153 |
| gene-AT1C  | 12.14224 | 11.62384 | 12.09861 | 10.73399 | 11.17342 | 10.78958 | 17.24693 | 17.72057 |
| gene-AT5C  | 7.576384 | 7.176273 | 6.419488 | 1.881435 | 2.13407  | 3.255246 | 1.265874 | 1.729499 |
| gene-AT1C  | 14.63358 | 13.04558 | 12.45001 | 9.478144 | 10.19636 | 9.924548 | 26.25995 | 28.6209  |
| gene-AT2C  | 0.588173 | 0.847984 | 0.54797  | 0.845383 | 0.541775 | 0.613049 | 1.28234  | 1.220663 |
| gene-AT2C  | 55.84122 | 55.70587 | 58.6783  | 34.53313 | 34.99532 | 31.90754 | 101.3418 | 103.8199 |
| gene-AT1C  | 2.205245 | 1.476327 | 1.604967 | 1.38818  | 0.89496  | 0.975095 | 1.996509 | 2.499302 |
| gene-AT1C  | 6.985989 | 6.557075 | 6.102451 | 9.50468  | 8.433048 | 8.386424 | 3.968003 | 4.151097 |
| gene-AT2C  | 3.269575 | 2.999894 | 3.399536 | 2.633598 | 3.045116 | 2.862975 | 0.445987 | 0.402683 |
| gene-AT3C  | 29.22726 | 31.95752 | 37.54245 | 33.30496 | 31.73097 | 27.73582 | 41.2488  | 42.36538 |
| gene-AT3C  | 7.082401 | 6.140295 | 6.087863 | 5.047737 | 5.401714 | 4.218052 | 11.0773  | 12.30483 |
| gene-AT2C  | 0.21231  | 0.262736 | 0.311793 | 1.579637 | 1.215281 | 1.117871 | 0.360751 | 0.333679 |
| gene-AT1C  | 14.26261 | 13.53979 | 14.35379 | 8.813721 | 8.124685 | 8.018848 | 14.87077 | 15.89961 |
| Arabidopsi | 2.160445 | 1.676519 | 1.861401 | 1.036703 | 1.113001 | 0.731126 | 0.310994 | 0.478515 |
| gene-AT1C  | 65.73245 | 64.06804 | 67.32558 | 41.98807 | 39.88076 | 39.00084 | 25.41209 | 27.90428 |
| gene-AT5C  | 20.43975 | 19.14817 | 20.13056 | 48.02253 | 51.88062 | 50.43451 | 27.41377 | 27.33922 |
| gene-AT2C  | 0.946304 | 1.735847 | 1.059406 | 1.790062 | 2.431171 | 2.014364 | 0        | 0        |
| gene-AT3C  | 4.696347 | 3.43123  | 3.86308  | 9.092832 | 10.22822 | 7.578119 | 4.9284   | 4.299495 |
| gene-AT1C  | 0.93552  | 0.910248 | 0.678174 | 0.699517 | 0.896415 | 0.825697 | 0.977534 | 1.350571 |
| gene-AT4C  | 63.8778  | 60.3555  | 62.21007 | 22.58452 | 21.12621 | 23.1704  | 16.50087 | 14.8057  |
| gene-AT3C  | 3.355223 | 2.642417 | 3.224581 | 1.025271 | 1.122936 | 1.024804 | 2.053303 | 2.531908 |
| gene-AT5C  | 7.366349 | 5.715704 | 6.2906   | 6.543464 | 6.366673 | 5.651372 | 9.134675 | 8.594094 |
| gene-AT4C  | 40.67433 | 41.64439 | 42.43184 | 46.95839 | 46.01492 | 50.01342 | 98.2326  | 103.2748 |
| gene-AT4C  | 11.23916 | 13.56185 | 12.99588 | 16.8936  | 15.89541 | 16.10091 | 5.696542 | 4.877762 |
| gene-AT5C  | 5.803234 | 6.508172 | 5.328962 | 7.762392 | 9.845052 | 10.21922 | 3.015484 | 2.791052 |
| gene-AT1C  | 4.138082 | 3.469853 | 4.708622 | 4.942127 | 3.980022 | 3.774576 | 7.595312 | 8.50948  |
| gene-AT1C  | 2.450819 | 2.461527 | 2.591967 | 0.701838 | 0.740988 | 1.157894 | 0.293795 | 0.910792 |
| gene-AT1C  | 0.306715 | 0.121229 | 0.317764 | 0.944283 | 0.717363 | 0.854852 | 0.52634  | 0.444817 |
| gene-AT3C  | 0.376425 | 0.37665  | 0.368088 | 0.702689 | 0.504737 | 0.710776 | 0.413213 | 0.529719 |
| gene-AT5C  | 0.956781 | 1.345503 | 1.277071 | 2.474834 | 2.026566 | 1.725203 | 0.676672 | 0.82754  |
| gene-AT3C  | 8.0604   | 10.37264 | 10.29625 | 4.271742 | 3.519929 | 4.527398 | 9.733117 | 9.662695 |
| gene-AT4C  | 0.208507 | 0.156272 | 0.112962 | 0.15747  | 0.1209   | 0.036602 | 0.036739 | 0        |
| gene-AT5C  | 73.81626 | 73.88427 | 73.70566 | 60.30534 | 65.57762 | 67.24789 | 108.7216 | 116.9812 |
| gene-AT2C  | 6.567817 | 6.159718 | 6.261453 | 15.67102 | 17.2045  | 15.21711 | 3.518069 | 4.370477 |
| gene-AT2C  | 3.630679 | 3.066425 | 3.030863 | 0.38439  | 0.157234 | 0.6291   | 0        | 0        |
| gene-AT1C  | 14.34782 | 16.57827 | 16.95148 | 9.244859 | 10.24172 | 10.01163 | 3.098222 | 3.592967 |
| gene-AT4C  | 0.035076 | 0        | 0.091386 | 0.138924 | 0.140913 | 0.047438 | 0        | 0        |
| gene-AT1C  | 2.161618 | 2.242585 | 2.727078 | 1.887692 | 2.1688   | 2.033591 | 0.976342 | 0.828389 |

|            |          |          |          |          |          |          |          |          |
|------------|----------|----------|----------|----------|----------|----------|----------|----------|
| gene-AT3C  | 0.168388 | 0        | 0.128745 | 0        | 0        | 0        | 0        | 0        |
| gene-AT3C  | 8.325328 | 8.651353 | 8.51565  | 9.258397 | 10.34006 | 9.173303 | 4.599448 | 3.801337 |
| gene-AT1C  | 9.124084 | 9.697216 | 8.431509 | 6.502371 | 6.70849  | 6.331296 | 18.19741 | 18.50649 |
| gene-AT1C  | 0.529447 | 0.577417 | 0.761354 | 0.509123 | 0.849777 | 0.674914 | 0.192188 | 0.259529 |
| gene-AT5C  | 54.1929  | 61.07449 | 54.54613 | 125.591  | 122.5132 | 117.5459 | 69.54142 | 74.8915  |
| gene-AT1C  | 10.30135 | 9.734852 | 10.84301 | 11.8996  | 14.06133 | 15.09755 | 3.8696   | 4.099944 |
| gene-AT4C  | 8.062537 | 9.328301 | 9.601725 | 8.7773   | 7.992456 | 8.549972 | 14.36898 | 10.73687 |
| gene-AT3C  | 2.312554 | 3.156779 | 2.745649 | 2.888553 | 2.592559 | 2.526292 | 3.483412 | 3.180173 |
| gene-AT5C  | 2.371468 | 2.095852 | 2.508027 | 2.029615 | 2.321362 | 2.690998 | 3.960138 | 3.914892 |
| gene-AT5C  | 12.00353 | 8.629646 | 11.9984  | 5.131481 | 5.981744 | 3.835235 | 1.482446 | 1.6332   |
| gene-AT3C  | 4.389567 | 4.532449 | 4.616272 | 2.418128 | 2.08538  | 2.852991 | 6.394683 | 6.371552 |
| gene-AT3C  | 13.54758 | 15.06737 | 12.99233 | 29.16532 | 27.88542 | 32.32774 | 6.817238 | 5.703826 |
| gene-AT5C  | 40.28925 | 39.04491 | 41.88732 | 22.47794 | 22.46636 | 22.92537 | 49.18652 | 51.46213 |
| gene-AT4C  | 6.588291 | 7.42971  | 7.492383 | 7.404715 | 8.932764 | 7.170204 | 2.484597 | 3.621866 |
| gene-AT2C  | 7.630882 | 8.04656  | 9.269403 | 5.233153 | 6.178574 | 5.788265 | 13.33054 | 12.54732 |
| gene-AT2C  | 5.739409 | 9.92079  | 6.428198 | 0.357423 | 0.4072   | 0        | 8.354247 | 7.928118 |
| gene-AT2C  | 17.26229 | 14.89205 | 14.70872 | 19.14858 | 19.52038 | 19.82497 | 27.30383 | 29.867   |
| gene-AT5C  | 469.0678 | 459.8968 | 465.4637 | 186.9607 | 186.2102 | 183.3269 | 650.1901 | 669.9632 |
| gene-AT4C  | 49.20565 | 47.17239 | 51.76963 | 26.75304 | 26.4982  | 26.83414 | 61.45644 | 64.71626 |
| gene-AT5C  | 0.294866 | 0.297296 | 0.49454  | 0.312486 | 0.401984 | 0.357779 | 0.819502 | 0.849216 |
| gene-AT5C  | 2.705253 | 2.661205 | 3.565303 | 2.678549 | 2.405455 | 2.655061 | 1.941731 | 1.838669 |
| Arabidopsi | 10.79013 | 10.15234 | 10.56006 | 7.311    | 7.870237 | 6.947112 | 3.77688  | 4.679077 |
| gene-AT2C  | 0.173255 | 0.840185 | 0.946184 | 105.339  | 104.7607 | 102.2673 | 0.198788 | 0.330785 |
| gene-AT5C  | 19.76018 | 18.06416 | 18.94168 | 14.66277 | 15.21102 | 15.06215 | 27.20515 | 27.52966 |
| gene-AT1C  | 9.372616 | 10.27466 | 10.38683 | 8.049803 | 8.690491 | 9.328758 | 4.122781 | 4.96067  |
| gene-AT4C  | 5.975884 | 5.144598 | 6.476767 | 3.636563 | 2.952861 | 3.194681 | 1.974369 | 1.359242 |
| gene-AT3C  | 3.376956 | 4.789772 | 3.48312  | 1.236422 | 1.822505 | 1.274549 | 1.572126 | 1.40392  |
| gene-AT1C  | 0.578651 | 1.06473  | 0.578164 | 0.878516 | 0.901044 | 0.961462 | 0.255868 | 0.753993 |
| gene-AT2C  | 0.941729 | 0.731656 | 0.72491  | 0.786549 | 0.808196 | 0.541893 | 1.375556 | 1.120038 |
| gene-AT2C  | 14.74251 | 14.74067 | 11.50713 | 20.06311 | 18.75178 | 18.18492 | 7.998188 | 6.909104 |
| Arabidopsi | 0.459819 | 0.300489 | 0.417732 | 5.075244 | 4.198666 | 2.924176 | 0.588354 | 0.518779 |
| gene-AT2C  | 130.4056 | 128.806  | 127.7696 | 116.7907 | 117.2067 | 116.4469 | 206.2138 | 220.6971 |
| Arabidopsi | 4.089203 | 3.333515 | 3.050555 | 2.802382 | 2.842929 | 2.454889 | 1.231058 | 1.077665 |
| gene-AT5C  | 19.1923  | 19.03291 | 17.86864 | 17.99424 | 18.49532 | 18.78194 | 31.42526 | 30.87422 |
| gene-AT3C  | 19.06581 | 20.88811 | 18.92008 | 14.95978 | 14.65127 | 14.96723 | 24.82828 | 26.49039 |
| gene-AT2C  | 601.1054 | 578.9587 | 613.7623 | 426.3969 | 415.2297 | 426.1786 | 258.6151 | 239.4717 |
| gene-AT1C  | 101.2952 | 100.3982 | 105.8478 | 256.3561 | 260.8629 | 246.9682 | 92.86343 | 85.8755  |
| gene-AT5C  | 0.391836 | 0.925206 | 0.773022 | 0.754033 | 0.740214 | 0.702269 | 0.421323 | 0.369952 |
| gene-AT1C  | 12.70177 | 11.8498  | 13.10417 | 12.19528 | 13.21104 | 13.04607 | 21.24919 | 18.59709 |
| gene-AT1C  | 5.656371 | 6.468714 | 5.862207 | 6.635437 | 5.707286 | 6.150062 | 8.67204  | 8.716032 |
| gene-AT4C  | 306.7366 | 298.8039 | 306.2052 | 419.549  | 418.4951 | 416.5397 | 150.2351 | 151.309  |
| gene-AT5C  | 14.50455 | 17.19361 | 14.88898 | 11.70371 | 12.71555 | 11.59339 | 29.09164 | 31.27197 |
| gene-AT1C  | 11.34467 | 10.71779 | 12.38784 | 1.729311 | 1.402892 | 1.73247  | 3.779884 | 3.491829 |
| gene-AT3C  | 156.7669 | 155.5567 | 157.8884 | 160.3564 | 158.0397 | 153.5857 | 170.9836 | 175.2574 |
| gene-AT1C  | 2.794192 | 2.511182 | 2.947434 | 2.545096 | 4.126942 | 4.004342 | 0.863829 | 1.207555 |
| gene-AT5C  | 2.474273 | 2.288098 | 2.213306 | 3.319853 | 2.971937 | 3.525083 | 0.868986 | 0.805879 |
| gene-AT1C  | 1.583053 | 0.927663 | 1.176121 | 5.026885 | 4.62485  | 4.334598 | 1.4897   | 1.476402 |
| gene-AT5C  | 15.1823  | 14.76803 | 15.01135 | 19.60211 | 19.16577 | 21.22588 | 6.33695  | 6.103051 |
| gene-AT2C  | 3.69805  | 3.393021 | 3.822155 | 2.94938  | 4.294044 | 3.379301 | 0.500841 | 1.421044 |
| gene-AT3C  | 0.101638 | 0        | 0.06813  | 0.606527 | 0.592035 | 0.650966 | 0        | 0        |
| gene-AT5C  | 0.225692 | 0.208293 | 0.20634  | 0.116384 | 0.132321 | 0.128945 | 0.248721 | 0.089017 |

|            |          |          |          |          |          |          |          |          |
|------------|----------|----------|----------|----------|----------|----------|----------|----------|
| gene-AT1C  | 7.988709 | 7.785176 | 8.266562 | 7.288224 | 6.188333 | 8.203955 | 12.46542 | 13.26812 |
| gene-AT1C  | 1.104366 | 0.582467 | 0.888173 | 0.704118 | 0.512718 | 0.290718 | 0.93793  | 0.896737 |
| gene-AT3C  | 40.26133 | 40.45592 | 42.01203 | 31.6995  | 31.96285 | 33.09058 | 47.19496 | 48.62637 |
| gene-AT3C  | 35.08763 | 39.96923 | 38.63161 | 32.13162 | 29.27548 | 27.8644  | 13.32187 | 15.04658 |
| gene-AT5C  | 21.78343 | 21.8525  | 23.00192 | 104.5493 | 101.0715 | 101.5777 | 16.88813 | 18.66478 |
| gene-AT5C  | 1.765994 | 3.123143 | 1.228599 | 2.338453 | 1.983401 | 2.19607  | 1.276438 | 2.529705 |
| gene-AT5C  | 6.457038 | 5.18398  | 5.938427 | 5.015832 | 3.901938 | 4.703843 | 12.32094 | 11.57632 |
| gene-AT2C  | 11.68026 | 12.42807 | 13.57022 | 14.24455 | 14.02601 | 14.39582 | 5.152297 | 5.892669 |
| gene-AT4C  | 14.09919 | 14.78146 | 15.06854 | 20.55555 | 20.3646  | 19.60936 | 10.06497 | 12.44038 |
| gene-AT1C  | 61.79219 | 60.39136 | 64.72079 | 1316.385 | 1310.107 | 1313.341 | 97.85001 | 98.61541 |
| gene-AT4C  | 54.22981 | 50.05949 | 56.39978 | 30.87285 | 30.10665 | 30.99452 | 67.76373 | 74.03331 |
| gene-AT1C  | 6.956105 | 6.254317 | 6.0387   | 3.369241 | 3.444897 | 3.637884 | 7.591862 | 8.152285 |
| gene-AT2C  | 1.211894 | 1.135606 | 1.036362 | 1.159935 | 1.618255 | 1.791642 | 0.304915 | 0.366112 |
| gene-AT3C  | 35.50306 | 36.97986 | 38.56178 | 47.35018 | 48.40657 | 48.6036  | 27.57773 | 27.87769 |
| gene-AT4C  | 40.05334 | 37.49983 | 39.64656 | 24.50632 | 23.8345  | 22.37358 | 55.28224 | 53.96098 |
| gene-AT5C  | 6.800532 | 7.149379 | 7.218681 | 6.94396  | 5.134748 | 7.307671 | 6.382232 | 5.592889 |
| gene-AT5C  | 36.56966 | 37.63332 | 34.68863 | 27.9441  | 24.92761 | 23.48356 | 61.20845 | 63.89668 |
| gene-AT1C  | 13.67068 | 13.80597 | 13.65485 | 10.44845 | 10.10226 | 9.602995 | 23.59641 | 24.56973 |
| gene-AT2C  | 2.99023  | 3.115322 | 3.399442 | 2.122602 | 1.943282 | 2.027614 | 1.046003 | 0.758332 |
| gene-AT5C  | 129.3056 | 133.5504 | 123.6612 | 146.4652 | 143.9279 | 133.5397 | 155.5129 | 147.2456 |
| gene-AT2C  | 90.16292 | 84.64276 | 89.05476 | 46.68849 | 45.57562 | 44.60673 | 87.27307 | 100.9819 |
| gene-AT2C  | 12.82478 | 12.26698 | 11.98256 | 14.52057 | 13.41357 | 14.93335 | 8.425116 | 7.001321 |
| gene-AT3C  | 1.391798 | 2.937065 | 2.187301 | 3.163237 | 4.262242 | 3.429581 | 1.233711 | 0.936687 |
| gene-AT5C  | 0.97047  | 1.319509 | 1.446421 | 0.717265 | 0.262372 | 0.524701 | 0.366846 | 0.311569 |
| Arabidopsi | 0.614984 | 0.454339 | 1.055903 | 0.511764 | 0.690517 | 0.199866 | 1.304599 | 0.929005 |
| Arabidopsi | 2.944397 | 2.244099 | 2.530619 | 3.624032 | 2.030069 | 2.479991 | 0.75143  | 1.733206 |
| gene-AT1C  | 7.739997 | 8.042237 | 8.022533 | 3.186332 | 2.690521 | 3.018249 | 15.26485 | 16.33525 |
| gene-AT2C  | 177.1332 | 166.5157 | 173.39   | 307.1275 | 324.3179 | 325.4962 | 34.47848 | 30.91214 |
| gene-AT2C  | 40.32325 | 39.81504 | 42.4782  | 23.80797 | 22.18094 | 24.76649 | 38.24204 | 34.00172 |
| gene-AT4C  | 419.644  | 420.2444 | 421.9486 | 318.3368 | 324.2126 | 316.3432 | 639.9514 | 645.7068 |
| gene-AT1C  | 36.39361 | 32.17434 | 32.38036 | 32.87025 | 33.58202 | 32.27681 | 35.25374 | 38.93512 |
| gene-AT1C  | 15.96136 | 15.64878 | 12.90309 | 11.90069 | 12.39568 | 13.31253 | 21.92836 | 21.24387 |
| gene-AT5C  | 22.04731 | 19.74404 | 20.37034 | 18.43938 | 19.63355 | 19.38101 | 7.585935 | 6.486104 |
| gene-AT2C  | 33.32423 | 36.34609 | 37.29606 | 8.334513 | 8.27529  | 7.732079 | 18.85835 | 20.66462 |
| gene-AT4C  | 4.843512 | 5.766901 | 5.378047 | 4.322874 | 5.279711 | 3.954144 | 2.555702 | 1.684064 |
| gene-AT2C  | 58.38213 | 62.20562 | 62.27939 | 30.69095 | 29.02254 | 30.33357 | 28.61936 | 28.66485 |
| gene-AT5C  | 5.964507 | 6.267678 | 6.038903 | 5.805095 | 6.3409   | 6.264496 | 1.062126 | 0.683596 |
| gene-AT1C  | 2.911086 | 3.675222 | 3.58855  | 4.941781 | 5.84195  | 4.302084 | 3.404855 | 3.168911 |
| gene-AT3C  | 16.54558 | 15.57031 | 16.56454 | 14.67249 | 15.81265 | 15.69025 | 22.32391 | 22.30308 |
| gene-AT1C  | 3.630899 | 2.132049 | 2.694453 | 2.48975  | 2.311689 | 3.074735 | 1.64417  | 2.187874 |
| gene-AT1C  | 19.56179 | 19.48899 | 18.48155 | 17.68456 | 17.62709 | 17.86171 | 22.26792 | 22.12682 |
| gene-AT2C  | 1.306691 | 1.74242  | 1.180173 | 1.743732 | 2.406319 | 2.997173 | 1.25636  | 1.233844 |
| gene-AT1C  | 12.40211 | 12.52125 | 14.2795  | 11.66821 | 11.7425  | 11.00936 | 4.129474 | 5.845396 |
| gene-AT2C  | 2.378002 | 2.665362 | 3.780859 | 1.382022 | 1.73446  | 1.520873 | 0.94806  | 0.686632 |
| gene-AT2C  | 3.386019 | 3.644106 | 3.501227 | 2.289003 | 1.78574  | 2.067642 | 4.030699 | 4.201217 |
| gene-AT4C  | 210.7267 | 217.3701 | 212.0986 | 178.5089 | 183.3206 | 173.3574 | 371.4569 | 330.1382 |
| gene-AT4C  | 3.209344 | 3.350145 | 2.594962 | 0.910992 | 1.216666 | 0.854799 | 0.837636 | 0.517478 |
| gene-AT1C  | 0.614876 | 0.421214 | 0.349959 | 0.944964 | 0.458036 | 0.745646 | 0.509513 | 0.411263 |
| gene-AT1C  | 3.852374 | 4.727904 | 4.393692 | 0.509278 | 0.947282 | 0.487255 | 4.538387 | 4.134004 |
| gene-AT5C  | 1.105119 | 0.536284 | 0.853309 | 2.879933 | 4.038033 | 3.568522 | 0.260546 | 0.716859 |
| gene-AT3C  | 45.70835 | 39.42492 | 42.38468 | 33.20204 | 33.35327 | 33.43562 | 16.90201 | 15.51437 |

|           |          |          |          |          |          |          |          |          |
|-----------|----------|----------|----------|----------|----------|----------|----------|----------|
| gene-AT1C | 11.83804 | 12.06168 | 12.8532  | 9.112272 | 8.32415  | 8.538671 | 11.95013 | 12.19564 |
| gene-AT3C | 0.777591 | 1.307885 | 0.716091 | 0.728593 | 0.227357 | 0.072685 | 1.89764  | 2.624743 |
| gene-AT4C | 10.22867 | 9.185081 | 9.688547 | 62.31699 | 65.39527 | 64.81522 | 5.908732 | 5.854416 |
| gene-AT3C | 6.511324 | 6.120465 | 6.195657 | 3.823798 | 3.606227 | 4.925064 | 12.28649 | 13.06525 |
| gene-AT5C | 3.553038 | 2.736017 | 2.900154 | 2.677739 | 1.937266 | 2.557041 | 3.838486 | 4.570286 |
| gene-AT1C | 2.217796 | 1.490603 | 1.702069 | 2.858471 | 2.577127 | 2.754674 | 3.264354 | 1.731349 |
| gene-AT1C | 7.710446 | 9.956376 | 6.200254 | 4.193615 | 3.438894 | 4.457083 | 6.952192 | 6.573557 |
| gene-AT1C | 3.372302 | 4.042632 | 3.177142 | 1.620827 | 2.021434 | 1.215717 | 2.827105 | 2.224847 |
| gene-AT1C | 14.10485 | 17.33205 | 13.82825 | 7.750066 | 9.361261 | 8.224738 | 9.314592 | 8.896194 |
| gene-AT1C | 46.63044 | 42.30563 | 46.63045 | 23.34971 | 21.85478 | 22.45251 | 36.19651 | 39.17837 |
| gene-AT3C | 87.96642 | 89.01854 | 88.12882 | 52.05963 | 54.04281 | 49.68089 | 119.6383 | 119.3829 |
| gene-AT3C | 2.666429 | 2.349231 | 2.855839 | 3.775967 | 3.595387 | 3.333353 | 1.214469 | 1.321894 |
| gene-AT5C | 30.74014 | 28.53342 | 31.03667 | 53.41169 | 56.00826 | 55.24763 | 19.09017 | 22.31332 |
| gene-AT3C | 1.834638 | 2.645352 | 1.258608 | 0.674891 | 0.847211 | 1.063478 | 2.405186 | 1.915435 |
| gene-AT4C | 3.129917 | 3.282515 | 2.884516 | 4.731115 | 4.85947  | 5.444417 | 2.923451 | 2.68973  |
| gene-AT5C | 107.9637 | 107.4018 | 105.7603 | 155.7591 | 154.741  | 150.6313 | 68.72908 | 71.51082 |
| gene-AT3C | 27.80963 | 27.00145 | 28.84671 | 43.30952 | 42.73538 | 44.1836  | 8.768845 | 9.194834 |
| gene-AT4C | 2.567916 | 3.252693 | 1.86522  | 1.395304 | 1.771759 | 1.215822 | 1.941941 | 2.252    |
| gene-AT4C | 4.77996  | 5.322544 | 6.185428 | 6.631272 | 6.732611 | 5.29143  | 0.616427 | 0.717591 |
| gene-AT1C | 1.872736 | 1.834138 | 1.599361 | 1.643118 | 1.672851 | 1.287292 | 1.478253 | 2.049648 |
| gene-AT5C | 0.436955 | 1.051884 | 0.342524 | 1.829468 | 1.733998 | 2.022188 | 0.398134 | 0.547632 |
| gene-AT1C | 1.354489 | 1.216745 | 1.379569 | 1.230201 | 1.270527 | 0.903118 | 3.36158  | 2.617809 |
| gene-AT2C | 14.50108 | 12.86956 | 13.34669 | 37.44013 | 35.99389 | 38.59362 | 5.878492 | 5.768209 |
| gene-AT3C | 40.43721 | 38.37647 | 40.54827 | 19.41217 | 18.30298 | 19.86433 | 31.45203 | 34.73218 |
| gene-AT4C | 1.717555 | 2.068401 | 1.701504 | 0.381771 | 0.503371 | 0.156253 | 0.266489 | 0.112708 |
| gene-AT1C | 27.11011 | 25.41293 | 25.96578 | 21.06716 | 19.36754 | 20.83189 | 35.05818 | 35.94107 |
| gene-AT1C | 21.17484 | 21.46306 | 19.11147 | 12.26511 | 12.87587 | 11.60355 | 25.87045 | 26.63771 |
| gene-AT4C | 1.671291 | 1.426584 | 1.730416 | 1.760076 | 1.917796 | 1.312814 | 2.621025 | 2.817318 |
| gene-AT3C | 15.60704 | 15.42171 | 15.13022 | 7.474136 | 6.318308 | 7.653345 | 17.28967 | 17.34233 |
| gene-AT5C | 5.424157 | 5.563027 | 4.491855 | 7.024483 | 6.164915 | 7.177291 | 7.738487 | 7.951537 |
| gene-AT5C | 4.41868  | 4.100238 | 4.072129 | 4.952743 | 5.091348 | 5.04859  | 5.984115 | 5.384066 |
| gene-AT3C | 2.461286 | 3.133833 | 2.402277 | 2.425144 | 2.966986 | 2.524603 | 5.92853  | 5.104103 |
| gene-AT1C | 4.564271 | 4.654368 | 4.828139 | 4.317884 | 3.429452 | 3.400682 | 7.434372 | 6.814844 |
| gene-AT3C | 2.097637 | 2.997851 | 3.634129 | 2.248996 | 1.640012 | 1.7484   | 5.558397 | 4.730745 |
| gene-AT4C | 0.89457  | 1.354613 | 1.480042 | 0.829145 | 1.38031  | 1.256582 | 0.259437 | 0.517483 |
| gene-AT4C | 51.70407 | 54.72516 | 53.01692 | 55.71795 | 56.03629 | 54.81008 | 62.68903 | 67.42309 |
| gene-AT5C | 0.319118 | 0.388959 | 0.460826 | 0.891657 | 0.679725 | 0.872191 | 0.125607 | 0.273403 |
| gene-AT4C | 42.22968 | 41.54586 | 44.20094 | 57.41443 | 58.27229 | 56.90598 | 18.85543 | 21.05386 |
| gene-AT5C | 2.885327 | 2.351552 | 2.277199 | 3.662871 | 3.227891 | 3.262405 | 1.35482  | 1.295031 |
| gene-AT3C | 2.720798 | 4.043802 | 3.558602 | 5.581777 | 6.47298  | 5.430183 | 1.554421 | 2.130792 |
| gene-AT5C | 2.515377 | 2.74401  | 2.820863 | 1.106915 | 0.757426 | 0.603136 | 2.09513  | 1.748465 |
| gene-AT1C | 6.559453 | 6.431404 | 6.513449 | 6.306121 | 6.7335   | 6.004083 | 2.052767 | 2.40936  |
| gene-AT2C | 0.02779  | 0.210799 | 0.04974  | 5.15353  | 3.635904 | 4.529415 | 0.170643 | 0.193531 |
| gene-AT1C | 16.86067 | 16.20003 | 16.18257 | 11.41411 | 10.06308 | 10.50769 | 6.058046 | 5.690125 |
| gene-AT4C | 17.12067 | 17.80285 | 18.8446  | 28.23255 | 26.82639 | 25.43339 | 2.142809 | 1.572956 |
| gene-AT1C | 3.158205 | 3.041738 | 3.251215 | 4.883201 | 4.716132 | 4.935039 | 8.833878 | 9.763505 |
| gene-AT3C | 84.41473 | 82.34261 | 80.09831 | 56.31569 | 57.25847 | 57.29821 | 140.4913 | 148.0422 |
| gene-AT2C | 2.563282 | 1.844022 | 2.160852 | 3.958197 | 3.484026 | 3.442597 | 1.654073 | 1.720957 |
| gene-AT5C | 1.959969 | 1.816487 | 3.424623 | 0.662456 | 1.406325 | 0.750921 | 2.40968  | 2.622704 |
| gene-AT1C | 36.57604 | 40.07465 | 41.32319 | 65.89241 | 65.83209 | 64.42822 | 22.20351 | 21.38685 |
| gene-AT5C | 2.546338 | 1.81957  | 2.493776 | 1.126634 | 0.849967 | 0.837206 | 0.581832 | 0.869723 |

|           |          |          |          |          |          |          |          |          |
|-----------|----------|----------|----------|----------|----------|----------|----------|----------|
| gene-AT3C | 17.81461 | 19.43535 | 20.28333 | 32.71319 | 28.87839 | 26.98959 | 14.17103 | 14.07667 |
| gene-AT4C | 1.298384 | 1.183065 | 1.129807 | 4.88     | 5.209826 | 5.390392 | 1.380787 | 1.899491 |
| gene-AT1C | 10.24357 | 10.88579 | 9.475862 | 11.2825  | 10.83159 | 12.67755 | 30.11632 | 26.18966 |
| gene-AT2C | 0.140211 | 0.07417  | 0.099361 | 0.020993 | 0.161331 | 0.102013 | 0.400711 | 0.461664 |
| gene-AT4C | 9.818214 | 8.094343 | 5.62833  | 8.075745 | 7.218903 | 7.214082 | 9.972176 | 8.679908 |
| gene-AT4C | 33.22496 | 33.71609 | 35.09114 | 20.77546 | 20.73851 | 20.82118 | 49.11079 | 48.549   |
| gene-AT2C | 4.73748  | 4.127048 | 4.522927 | 21.15879 | 21.70413 | 18.67921 | 3.210028 | 3.355875 |
| gene-AT5C | 1.186185 | 0.835596 | 1.510831 | 0.671019 | 1.340331 | 1.36275  | 2.955743 | 2.011043 |
| gene-AT4C | 0.235463 | 0.541921 | 0.567092 | 0.798049 | 1.145951 | 1.194775 | 0.289362 | 0.178383 |
| gene-AT4C | 5.206016 | 4.346445 | 4.209144 | 2.397395 | 1.809733 | 1.771657 | 7.575359 | 8.878899 |
| gene-AT4C | 1.831027 | 3.115585 | 2.033163 | 2.70733  | 3.134334 | 2.595726 | 3.117755 | 3.041354 |
| gene-AT3C | 38.88566 | 42.24688 | 40.84345 | 35.69604 | 38.2146  | 34.43058 | 56.71271 | 56.4656  |
| gene-AT1C | 27.61982 | 27.64459 | 28.76391 | 41.33669 | 41.8291  | 39.79933 | 13.99731 | 16.68553 |
| gene-AT1C | 28.18965 | 29.90709 | 28.39713 | 34.32933 | 33.97593 | 32.83505 | 24.68472 | 25.1599  |
| gene-AT4C | 21.77956 | 21.17734 | 20.67255 | 20.45373 | 20.1393  | 17.92811 | 21.87193 | 23.34702 |
| gene-AT5C | 41.86609 | 42.2278  | 41.00099 | 21.43572 | 20.44791 | 18.79683 | 32.1405  | 32.8772  |
| gene-AT4C | 5.160963 | 5.769204 | 4.929611 | 1.445924 | 1.049943 | 1.517992 | 1.556441 | 1.294295 |
| gene-AT3C | 12.38379 | 10.47417 | 10.20668 | 3.642604 | 4.824218 | 4.215841 | 7.177544 | 8.845962 |
| gene-AT1C | 2.413484 | 2.317051 | 2.292555 | 2.990495 | 3.0201   | 2.928056 | 0.971133 | 1.021358 |
| gene-AT5C | 33.72654 | 38.45154 | 34.1809  | 24.52982 | 26.20474 | 23.66168 | 14.002   | 10.75127 |
| gene-AT5C | 43.1821  | 44.64912 | 42.68359 | 25.45172 | 25.88873 | 25.34489 | 65.66811 | 67.00245 |
| gene-AT3C | 20.43064 | 19.37608 | 19.08908 | 7.31058  | 7.107614 | 5.788727 | 39.14386 | 41.02299 |
| gene-AT5C | 3.033821 | 3.128056 | 3.641369 | 4.750126 | 4.007082 | 3.775553 | 0.911388 | 1.618419 |
| gene-AT3C | 38.31818 | 35.0104  | 38.55043 | 28.27317 | 26.94263 | 27.19548 | 63.63184 | 67.39031 |
| gene-AT3C | 0.33741  | 0.602024 | 0.808737 | 1.084776 | 1.029884 | 1.281114 | 1.607094 | 1.187438 |
| gene-AT1C | 16.86726 | 15.3321  | 16.41196 | 29.33084 | 27.99187 | 29.20775 | 5.203912 | 4.888597 |
| gene-AT3C | 359.6173 | 348.0082 | 354.7539 | 601.5516 | 603.2603 | 590.5808 | 242.1916 | 250.9646 |
| gene-AT4C | 101.4676 | 104.8461 | 105.2055 | 90.20657 | 86.97601 | 86.75842 | 164.4482 | 160.4852 |
| gene-AT1C | 1.332291 | 0.94873  | 1.377373 | 11.78573 | 11.38954 | 11.2926  | 1.924773 | 1.302806 |
| gene-AT3C | 8.996071 | 10.47777 | 9.062995 | 18.34602 | 19.75079 | 17.49721 | 8.670303 | 7.970958 |
| gene-AT1C | 10.96121 | 9.893139 | 8.890679 | 7.193643 | 8.136474 | 6.07884  | 2.156524 | 2.061984 |
| gene-AT1C | 1.527914 | 2.300692 | 2.066959 | 4.336666 | 4.274972 | 3.927988 | 0.896147 | 1.144038 |
| gene-AT5C | 168.2347 | 161.1196 | 165.3553 | 50.55479 | 48.5338  | 49.94671 | 120.7259 | 125.9651 |
| gene-AT5C | 55.5076  | 52.54702 | 55.81798 | 25.75713 | 26.67843 | 25.89466 | 128.7082 | 115.6946 |
| gene-AT3C | 1.712258 | 1.865176 | 1.782739 | 0.91095  | 0.743843 | 0.745279 | 1.171188 | 0.890543 |
| gene-AT1C | 3.462171 | 2.822637 | 1.909659 | 2.54652  | 3.484222 | 3.737764 | 3.952361 | 3.664564 |
| gene-AT3C | 13.09965 | 15.93273 | 15.96111 | 41.60613 | 39.30151 | 42.81254 | 14.7324  | 14.55041 |
| gene-AT3C | 0.503459 | 0.628676 | 0.520449 | 0.018745 | 0.033372 | 0.018123 | 0.082987 | 0.07396  |
| gene-AT2C | 4.437275 | 3.670796 | 4.228109 | 6.33396  | 6.333843 | 5.835519 | 5.988697 | 6.241271 |
| gene-AT5C | 43.48816 | 43.35955 | 40.2078  | 31.48773 | 31.81502 | 32.2485  | 12.44242 | 13.50758 |
| gene-AT4C | 11.47856 | 12.64428 | 10.46538 | 8.804088 | 8.389302 | 8.425222 | 1.93051  | 2.596267 |
| gene-AT3C | 0.591767 | 0.452855 | 0.704703 | 0.808211 | 0.652205 | 0.774375 | 0.077493 | 0.137643 |
| gene-AT4C | 1.437175 | 1.320087 | 1.437035 | 0        | 0        | 0        | 0        | 0        |
| gene-AT1C | 17.60488 | 20.2623  | 20.26261 | 12.17419 | 12.63851 | 10.97262 | 28.4997  | 30.87282 |
| gene-AT3C | 7.152619 | 7.352808 | 8.751429 | 4.708988 | 4.583986 | 6.139727 | 5.002819 | 6.606113 |
| gene-AT1C | 0.485959 | 0.685309 | 0.380423 | 0.393894 | 0.703319 | 0.497887 | 0.230609 | 0.216323 |
| gene-AT3C | 5.318156 | 4.036316 | 3.603602 | 2.781852 | 2.786924 | 3.251193 | 9.823985 | 11.31109 |
| gene-AT2C | 3.467678 | 3.813732 | 4.76559  | 3.505539 | 3.542634 | 2.959737 | 3.746876 | 3.257201 |
| gene-AT1C | 1.486761 | 1.081298 | 0.977554 | 2.734158 | 3.392827 | 2.918418 | 2.342361 | 1.337252 |
| gene-AT3C | 3.995728 | 3.576833 | 3.638852 | 5.145354 | 4.854672 | 4.814445 | 1.203845 | 1.33822  |
| gene-AT3C | 0.619075 | 0.568804 | 0.605797 | 0.282405 | 0.322868 | 0.099878 | 0.112794 | 0.223648 |

|           |          |          |          |          |          |          |          |          |
|-----------|----------|----------|----------|----------|----------|----------|----------|----------|
| gene-AT5C | 0.608497 | 1.486398 | 1.367248 | 2.767043 | 1.778465 | 1.738526 | 0.403152 | 0.69541  |
| gene-AT4C | 20.45576 | 22.3499  | 21.69268 | 16.82733 | 15.99578 | 16.29928 | 35.29953 | 39.7668  |
| gene-AT4C | 8.708371 | 8.396156 | 8.173796 | 8.247481 | 6.592893 | 7.568892 | 3.268776 | 4.05694  |
| gene-AT3C | 1.857055 | 1.77873  | 1.873976 | 3.01599  | 3.540766 | 2.093157 | 2.294008 | 1.758138 |
| gene-AT1C | 105.9301 | 97.36757 | 94.97812 | 72.64315 | 80.89321 | 72.85819 | 173.3639 | 183.2476 |
| gene-AT5C | 15.64459 | 15.35226 | 14.02618 | 15.67524 | 13.27298 | 16.37314 | 6.484185 | 7.002244 |
| gene-AT4C | 129.3525 | 119.6159 | 128.0981 | 66.16361 | 65.86619 | 64.0173  | 41.26885 | 42.93956 |
| gene-AT5C | 0.569407 | 0.428756 | 0.37262  | 0.676651 | 0.294359 | 0.436168 | 0.980637 | 1.579569 |
| gene-AT3C | 60.56513 | 60.79386 | 60.44706 | 46.74752 | 45.62768 | 45.41106 | 95.80064 | 93.43029 |
| gene-AT3C | 4.18587  | 4.300224 | 4.164514 | 1.792165 | 2.481332 | 2.386821 | 6.520592 | 5.793938 |
| gene-AT5C | 4.439531 | 3.71855  | 3.665803 | 7.021649 | 8.288627 | 8.084923 | 2.998915 | 1.806504 |
| gene-AT5C | 15.87255 | 16.60063 | 16.41647 | 13.28684 | 14.86133 | 12.58417 | 27.53507 | 31.20362 |
| gene-AT2C | 146.1097 | 136.8764 | 145.7522 | 85.54237 | 82.26366 | 82.38274 | 259.2732 | 256.0082 |
| gene-AT1C | 28.56884 | 31.04101 | 29.91328 | 28.9127  | 31.13612 | 30.7235  | 7.936633 | 7.171441 |
| gene-AT2C | 7.891013 | 7.799372 | 7.757276 | 12.45457 | 11.79388 | 12.61715 | 4.808798 | 5.894599 |
| gene-AT2C | 0.702814 | 0.635813 | 0.743497 | 0.481918 | 0.59222  | 0.219543 | 1.754622 | 1.843105 |
| gene-AT1C | 2.847924 | 3.729774 | 3.730363 | 1.968132 | 1.954491 | 2.238676 | 10.67899 | 10.31514 |
| gene-AT1C | 7.124542 | 5.480699 | 7.751837 | 10.53426 | 11.86363 | 10.45942 | 5.240045 | 4.123216 |
| gene-AT4C | 0.954721 | 1.074075 | 1.111847 | 1.785292 | 2.249063 | 1.760705 | 0.326896 | 0.34038  |
| gene-AT5C | 1.067009 | 1.19347  | 1.049829 | 1.112565 | 0.887167 | 1.61866  | 0.640001 | 0.808881 |
| gene-AT5C | 16.5866  | 16.81455 | 16.72156 | 6.416471 | 7.202203 | 7.815075 | 2.624404 | 3.035098 |
| gene-AT1C | 15.76866 | 13.98392 | 12.98574 | 6.564427 | 7.240405 | 6.582722 | 2.949439 | 3.744375 |
| gene-AT2C | 8.084064 | 6.927764 | 7.738722 | 6.501904 | 6.200548 | 5.748722 | 15.23092 | 14.09794 |
| gene-AT2C | 6.350164 | 7.120257 | 6.51453  | 5.505402 | 5.74101  | 5.635736 | 2.76628  | 2.74167  |
| gene-AT1C | 3.898106 | 3.742677 | 3.467487 | 7.327276 | 8.150499 | 9.995188 | 2.677011 | 3.653963 |
| gene-AT3C | 1.966792 | 2.694092 | 2.391401 | 2.978149 | 3.66185  | 2.622696 | 0.665673 | 0.810807 |
| gene-AT2C | 9.701049 | 9.707541 | 10.53026 | 10.37596 | 10.80203 | 11.0194  | 4.031497 | 3.351699 |
| gene-AT5C | 12.2614  | 10.97823 | 12.67754 | 13.11403 | 16.51902 | 15.50035 | 5.562286 | 5.077964 |
| gene-AT5C | 1.031254 | 1.085484 | 1.251374 | 0.316452 | 0.311188 | 0.731674 | 2.000641 | 2.196477 |
| gene-AT3C | 193.5758 | 203.3178 | 196.4464 | 96.46853 | 92.46094 | 97.65315 | 349.7902 | 353.3736 |
| gene-AT5C | 12.44    | 12.18605 | 13.15498 | 19.67673 | 22.81007 | 21.36684 | 11.30566 | 13.87245 |
| gene-AT2C | 18.04649 | 18.17046 | 18.83319 | 16.07344 | 16.08777 | 15.44568 | 28.90358 | 27.648   |
| gene-AT2C | 0.988181 | 1.646339 | 1.319894 | 0        | 0        | 0        | 0        | 0        |
| gene-AT1C | 17.34563 | 14.9114  | 17.64074 | 15.32471 | 14.18143 | 14.78788 | 7.631686 | 8.713058 |
| gene-AT3C | 4.02177  | 5.003233 | 4.003822 | 8.162891 | 7.026835 | 10.22554 | 2.818779 | 2.270678 |
| gene-AT4C | 308.0632 | 302.7171 | 311.7435 | 367.113  | 357.7943 | 354.0929 | 196.1658 | 210.8298 |
| gene-AT3C | 0        | 0        | 0        | 0.659954 | 0.577648 | 0.382165 | 0.166111 | 0        |
| gene-AT3C | 2.48076  | 1.774334 | 1.908626 | 4.183636 | 4.819418 | 4.482203 | 5.224761 | 5.304448 |
| gene-AT1C | 123.7486 | 125.084  | 121.0994 | 41.6049  | 40.59385 | 43.37417 | 186.6413 | 195.0572 |
| gene-AT1C | 50.52443 | 53.49363 | 53.60183 | 25.9225  | 25.514   | 23.41931 | 141.7061 | 144.161  |
| gene-AT3C | 5.310022 | 5.651468 | 4.57407  | 6.732847 | 6.829452 | 7.772683 | 2.188059 | 2.01612  |
| gene-AT5C | 27.04088 | 19.82392 | 23.12861 | 30.13137 | 30.11252 | 28.55267 | 15.71529 | 12.60239 |
| gene-AT3C | 4.22536  | 4.163389 | 3.480692 | 4.900767 | 4.569265 | 4.594807 | 11.3178  | 10.24355 |
| gene-AT1C | 372.4491 | 363.315  | 367.0176 | 188.0342 | 178.0289 | 182.1331 | 81.68665 | 92.08933 |
| gene-AT1C | 4.738499 | 4.981795 | 4.479751 | 3.722126 | 4.109873 | 3.814882 | 4.447147 | 4.869341 |
| gene-AT5C | 9.843488 | 9.121028 | 10.21692 | 10.02834 | 9.401706 | 10.04345 | 6.808939 | 6.893502 |
| gene-AT4C | 0.243677 | 0.183442 | 0.202677 | 0.801393 | 1.043633 | 0.74515  | 0.291607 | 0.17173  |
| gene-AT4C | 27.7223  | 30.75848 | 28.46911 | 9.288747 | 9.286406 | 9.824519 | 20.89551 | 21.79178 |
| gene-AT2C | 5.208755 | 6.395279 | 5.82084  | 2.95238  | 3.010663 | 2.137446 | 2.437283 | 3.094144 |
| gene-AT5C | 1.486675 | 1.723232 | 1.507999 | 1.009055 | 1.018467 | 1.118532 | 2.820332 | 2.522516 |
| gene-AT3C | 11.13016 | 9.539778 | 10.47989 | 15.55569 | 14.79056 | 16.31363 | 5.603767 | 6.188662 |

|            |          |          |          |          |          |          |          |          |
|------------|----------|----------|----------|----------|----------|----------|----------|----------|
| gene-AT1C  | 13.80346 | 13.91316 | 12.03879 | 13.35735 | 13.62025 | 13.39534 | 17.22174 | 16.45914 |
| gene-AT4C  | 6.465986 | 6.372663 | 7.305735 | 6.504534 | 5.333933 | 6.111733 | 11.70197 | 10.46619 |
| gene-AT2C  | 420.9178 | 418.7064 | 426.6009 | 355.347  | 359.8911 | 346.1129 | 612.7378 | 644.8268 |
| gene-AT1C  | 5.921582 | 6.351111 | 6.136713 | 2.895695 | 2.113471 | 2.96655  | 0.85439  | 0.91092  |
| gene-AT1C  | 0.470542 | 0.648187 | 0.883267 | 1.165924 | 1.204136 | 0.966437 | 1.522976 | 1.75036  |
| gene-AT2C  | 13.2504  | 13.01421 | 13.50392 | 11.15697 | 11.11931 | 10.87538 | 22.20009 | 20.00486 |
| gene-AT3C  | 9.215043 | 8.731795 | 11.49001 | 7.494732 | 8.73456  | 6.914392 | 2.723216 | 2.836111 |
| gene-AT2C  | 13.67765 | 13.73441 | 12.86217 | 9.85373  | 10.74291 | 10.60632 | 3.434437 | 2.651099 |
| gene-AT4C  | 3.608548 | 3.424384 | 3.772406 | 8.907683 | 8.823439 | 7.234044 | 2.172484 | 1.804971 |
| gene-AT5C  | 85.07533 | 95.15321 | 86.78499 | 58.40793 | 53.78562 | 59.55345 | 157.0191 | 142.6855 |
| gene-AT4C  | 892.1707 | 915.2256 | 907.8893 | 1528.049 | 1547.146 | 1504.759 | 424.6983 | 444.3815 |
| gene-AT5C  | 3.259496 | 2.711171 | 2.379574 | 2.005332 | 2.073651 | 1.829078 | 2.992743 | 3.922449 |
| gene-AT3C  | 0.448688 | 0.386011 | 0.561199 | 0.547113 | 0.69779  | 0.695366 | 1.492973 | 1.915793 |
| gene-AT2C  | 2.60587  | 2.079336 | 2.120816 | 3.82545  | 3.998605 | 3.164708 | 1.050269 | 0.854939 |
| gene-AT2C  | 0.196961 | 0.204556 | 0.098912 | 0.181833 | 0.323552 | 0.22741  | 0.260238 | 0.139875 |
| gene-AT1C  | 4.213969 | 3.630187 | 4.625201 | 6.241777 | 5.420519 | 6.798327 | 2.99424  | 3.113386 |
| gene-AT1C  | 0.928377 | 0.505536 | 1.177158 | 0.925475 | 0.844209 | 0.875411 | 1.892887 | 2.396845 |
| gene-AT4C  | 113.5314 | 113.2485 | 114.2609 | 53.65006 | 51.08232 | 49.82357 | 28.59586 | 29.29089 |
| gene-AT5C  | 12.83    | 11.23965 | 13.50693 | 62.50257 | 57.42953 | 63.48743 | 8.712996 | 8.546893 |
| gene-AT1C  | 16.84107 | 19.36076 | 18.94286 | 9.491036 | 7.418356 | 9.799975 | 19.02697 | 19.13886 |
| gene-AT3C  | 210.6405 | 202.3138 | 206.7706 | 136.1335 | 137.6431 | 135.7812 | 299.8099 | 321.4302 |
| gene-AT1C  | 0        | 0        | 0.126287 | 0.623797 | 1.039346 | 0.688767 | 0.460029 | 1.205955 |
| Arabidopsi | 0.726569 | 0.87742  | 0.907098 | 0.194213 | 0.432319 | 0.388314 | 5.076103 | 5.625683 |
| gene-AT5C  | 0.586983 | 0.573351 | 0.649212 | 1.13698  | 1.109393 | 1.034111 | 1.932363 | 2.159603 |
| gene-AT5C  | 2.046937 | 2.741762 | 2.177856 | 4.534806 | 4.036513 | 5.076386 | 1.602958 | 1.812875 |
| gene-AT2C  | 3.839374 | 3.2208   | 4.013475 | 5.08431  | 4.890466 | 3.602879 | 4.200082 | 5.561151 |
| gene-AT5C  | 6.104192 | 4.955905 | 5.681712 | 3.628771 | 5.007133 | 5.915616 | 3.330473 | 3.441225 |
| gene-AT5C  | 26.99234 | 27.71373 | 25.35617 | 32.33399 | 32.63049 | 31.58618 | 15.25766 | 15.88997 |
| gene-AT5C  | 0.303373 | 0.283663 | 0.147831 | 0.26318  | 0.182684 | 0.173616 | 3.506206 | 3.90374  |
| gene-AT4C  | 6.999725 | 7.440665 | 6.371718 | 5.15481  | 4.38998  | 4.311398 | 2.371135 | 2.504705 |
| gene-AT4C  | 0.22565  | 0.160885 | 0.371007 | 0.700047 | 0.436881 | 0.595029 | 0.263771 | 0.017944 |
| gene-AT2C  | 2.427994 | 1.63102  | 1.44046  | 2.070414 | 1.817128 | 2.206636 | 1.372137 | 1.133933 |
| gene-AT1C  | 22.18912 | 21.82627 | 20.59739 | 17.48222 | 15.40084 | 17.33059 | 30.6034  | 32.24825 |
| gene-AT3C  | 0        | 0        | 0        | 0        | 0.121319 | 0        | 0.17602  | 0.111165 |
| gene-AT5C  | 0.920102 | 1.134415 | 2.060131 | 1.928228 | 1.300331 | 1.44168  | 3.584945 | 2.726956 |
| gene-AT5C  | 2.70315  | 2.961413 | 2.581764 | 7.592455 | 7.500482 | 6.596179 | 4.778545 | 5.070435 |
| gene-AT5C  | 4.221015 | 4.81551  | 4.557651 | 6.061041 | 5.75499  | 6.654688 | 1.837775 | 2.233062 |
| gene-AT4C  | 0.399548 | 0.449037 | 0.316936 | 0.089307 | 0.07326  | 0.171533 | 0.163062 | 0.029546 |
| gene-AT1C  | 12.85785 | 12.48573 | 11.95863 | 13.34268 | 13.87548 | 13.95598 | 13.72911 | 13.68353 |
| gene-AT1C  | 8.321942 | 7.779731 | 7.365825 | 6.772036 | 6.446512 | 6.775943 | 10.76783 | 11.40288 |
| gene-AT5C  | 1.273605 | 1.203867 | 2.157835 | 2.148858 | 1.960122 | 2.035359 | 2.502456 | 1.753235 |
| gene-AT4C  | 14.57008 | 13.99756 | 14.47431 | 10.56229 | 9.770521 | 11.60964 | 23.15157 | 20.99749 |
| gene-AT4C  | 6.882397 | 7.082555 | 8.04149  | 13.36566 | 11.4907  | 12.03863 | 3.416859 | 2.362419 |
| gene-AT5C  | 40.5975  | 35.59702 | 35.65148 | 56.92307 | 61.10547 | 59.24803 | 18.68179 | 18.29265 |
| gene-AT3C  | 13.7827  | 13.07653 | 14.34313 | 12.11757 | 13.42124 | 11.39024 | 17.09293 | 18.75643 |
| gene-AT4C  | 553.7575 | 550.321  | 562.6738 | 451.9831 | 448.5809 | 445.3326 | 741.0837 | 786.5399 |
| gene-AT4C  | 9.568487 | 9.974877 | 10.92847 | 5.288098 | 5.520844 | 4.647089 | 15.88582 | 16.56874 |
| gene-AT3C  | 17.93662 | 19.37652 | 20.86269 | 21.71542 | 19.85689 | 20.15905 | 7.82711  | 7.247982 |
| gene-AT3C  | 13.18252 | 12.35122 | 12.69132 | 8.544265 | 8.077564 | 8.42468  | 10.47716 | 11.33572 |
| gene-AT3C  | 0.996801 | 1.208808 | 1.186345 | 6.507615 | 7.421376 | 7.672991 | 0.186008 | 0.2322   |
| gene-AT3C  | 102.5277 | 108.5264 | 106.2874 | 72.63976 | 69.0147  | 70.28653 | 29.21642 | 25.67351 |

|           |          |          |          |          |          |          |          |          |
|-----------|----------|----------|----------|----------|----------|----------|----------|----------|
| gene-AT5C | 2.499237 | 2.257693 | 2.207284 | 1.078327 | 1.306705 | 2.081297 | 0.754522 | 0.900692 |
| gene-AT1C | 0.244547 | 0.221021 | 0.278852 | 0.934825 | 0.718905 | 1.268391 | 0.357499 | 0.360168 |
| gene-AT2C | 0.955404 | 1.854933 | 0.842411 | 2.113723 | 1.794312 | 2.305904 | 1.838459 | 2.92745  |
| gene-AT5C | 21.5854  | 21.36048 | 22.38162 | 20.55801 | 19.30302 | 18.63212 | 10.00194 | 11.01712 |
| gene-AT5C | 13.84217 | 12.99274 | 12.26521 | 38.47585 | 37.6607  | 37.54898 | 21.36337 | 21.32145 |
| gene-AT5C | 16.9168  | 16.43565 | 13.99418 | 20.29008 | 16.78203 | 22.04808 | 13.72553 | 16.14259 |
| gene-AT3C | 15.46943 | 15.91357 | 16.594   | 12.86478 | 12.92448 | 12.02847 | 7.57805  | 5.808136 |
| gene-AT5C | 2.566464 | 2.826526 | 2.550966 | 7.370791 | 6.837476 | 6.745699 | 0        | 0        |
| gene-AT4C | 1.398597 | 0.595942 | 1.00526  | 1.489474 | 0.980364 | 1.192851 | 0.694046 | 0.940826 |
| gene-AT5C | 11.9979  | 13.23274 | 13.24546 | 30.66163 | 33.24582 | 33.84064 | 18.3006  | 17.67274 |
| gene-AT1C | 1.667768 | 1.465951 | 1.812215 | 2.158111 | 2.001361 | 1.620962 | 2.834765 | 2.974296 |
| gene-AT1C | 125.9295 | 139.1619 | 125.3718 | 65.01038 | 72.22115 | 67.21227 | 227.7927 | 225.281  |
| gene-AT2C | 24.6744  | 24.65851 | 24.15844 | 24.9619  | 21.88851 | 22.03231 | 26.18651 | 27.78388 |
| gene-AT5C | 4.689948 | 7.707778 | 7.198543 | 8.240914 | 8.606982 | 7.792868 | 1.414972 | 1.520478 |
| gene-AT3C | 4.94007  | 5.028276 | 5.703888 | 1.990464 | 3.057446 | 3.229307 | 6.445233 | 6.45393  |
| gene-AT4C | 11.29836 | 12.08374 | 10.27882 | 9.004208 | 7.952781 | 9.61249  | 4.487433 | 4.104653 |
| gene-AT3C | 1.209735 | 1.272138 | 0.810799 | 0.313339 | 0.360842 | 0.176557 | 0.592869 | 0.504914 |
| gene-AT4C | 3.934082 | 3.943629 | 3.591596 | 2.212613 | 2.152966 | 2.253015 | 5.240883 | 4.324318 |
| gene-AT3C | 22.04355 | 21.7171  | 21.22445 | 14.89717 | 16.43981 | 16.20272 | 17.4757  | 18.48425 |
| gene-AT3C | 16.12315 | 20.17137 | 14.45304 | 15.90601 | 16.12931 | 17.01372 | 33.63488 | 37.47157 |
| gene-AT1C | 9.383865 | 9.56415  | 11.54715 | 20.13675 | 22.53876 | 20.38796 | 11.69647 | 14.02184 |
| gene-AT1C | 177.118  | 175.1856 | 172.777  | 111.3601 | 105.8972 | 104.8135 | 120.5561 | 133.4525 |
| gene-AT4C | 0.995849 | 1.342486 | 0.703027 | 0.333356 | 0.092653 | 0.101791 | 0.027664 | 0.111193 |
| gene-AT3C | 0.602209 | 0.820303 | 0.486132 | 0.383508 | 0.915422 | 0.691681 | 0.375521 | 0.58197  |
| gene-AT5C | 1.060597 | 1.080477 | 0.734076 | 1.965705 | 1.865247 | 1.638371 | 0.296766 | 0.158958 |
| gene-AT1C | 0.561795 | 0.937642 | 0.488699 | 0.130416 | 0.293154 | 0.302778 | 0.928863 | 0.842    |
| gene-AT3C | 1.457027 | 1.106381 | 1.21549  | 2.899897 | 3.02128  | 3.174983 | 1.084119 | 1.06072  |
| gene-AT5C | 0.782523 | 0.601557 | 0.993146 | 0.425932 | 0.141317 | 0.249048 | 0.155926 | 0.227837 |
| gene-AT3C | 6.357608 | 6.828379 | 5.244111 | 14.76124 | 13.39525 | 14.22234 | 6.48281  | 5.373055 |
| gene-AT2C | 3.094687 | 3.39142  | 3.829115 | 3.975312 | 3.332723 | 4.551284 | 5.552916 | 5.264576 |
| gene-AT5C | 2.598107 | 3.208656 | 2.892866 | 10.32306 | 10.45916 | 9.284126 | 1.354423 | 2.006366 |
| gene-AT3C | 11.18859 | 13.06515 | 10.86906 | 8.039547 | 6.880628 | 9.876844 | 2.487075 | 3.252851 |
| gene-AT3C | 1.550368 | 1.208948 | 1.623942 | 1.317589 | 1.248534 | 1.580203 | 2.737578 | 3.271467 |
| gene-AT3C | 2.468559 | 1.921016 | 2.160882 | 0.330562 | 0.389544 | 0.716205 | 0.063665 | 0.167716 |
| gene-AT1C | 1.391057 | 1.348868 | 1.233278 | 9.959415 | 10.49182 | 9.473489 | 0.158148 | 0.263271 |
| gene-AT1C | 0.835023 | 1.056491 | 0.61138  | 1.75269  | 2.056278 | 1.772057 | 1.133993 | 0.889729 |
| gene-AT1C | 0.133786 | 0.352638 | 0.173593 | 1.415129 | 0.630821 | 0.820923 | 0.69909  | 0.373616 |
| gene-AT3C | 3.926652 | 3.00297  | 2.022847 | 1.955187 | 2.368216 | 1.326589 | 3.559417 | 5.959585 |
| gene-AT3C | 8.898171 | 8.385497 | 8.535298 | 1.914509 | 1.105394 | 2.080947 | 4.537674 | 4.697886 |
| gene-AT1C | 11.29408 | 11.54153 | 11.20208 | 2.185393 | 1.792978 | 2.111797 | 6.631694 | 6.159183 |
| gene-AT3C | 15.75846 | 14.75162 | 15.30088 | 24.38202 | 21.72776 | 24.11348 | 9.112621 | 8.7981   |
| gene-AT1C | 1.418475 | 1.154797 | 1.085726 | 1.67307  | 1.160127 | 1.555575 | 1.491131 | 1.132859 |
| gene-AT1C | 0        | 0.117113 | 0        | 35.92117 | 32.27152 | 38.02084 | 0.199566 | 0.367827 |
| gene-AT3C | 4.102019 | 3.894957 | 3.322441 | 10.99    | 10.10679 | 10.60209 | 2.322596 | 2.481594 |
| gene-AT2C | 9.379697 | 9.510751 | 9.616342 | 12.08281 | 13.74292 | 12.95622 | 9.413474 | 7.607497 |
| gene-AT4C | 123.5648 | 118.2054 | 119.597  | 85.45728 | 88.01932 | 88.39791 | 186.0184 | 185.3934 |
| gene-AT5C | 4.488742 | 4.936148 | 4.043766 | 2.045309 | 1.556672 | 1.370871 | 0.867871 | 0.664045 |
| gene-AT1C | 7.571536 | 7.571167 | 7.319086 | 8.979251 | 9.139906 | 8.367059 | 6.086654 | 6.19986  |
| gene-AT4C | 2.907509 | 2.598225 | 3.473191 | 0.826547 | 0.867705 | 0.540049 | 4.759968 | 4.407948 |
| gene-AT2C | 17.77085 | 15.77183 | 15.98578 | 9.797353 | 10.34675 | 9.466467 | 9.665232 | 9.401172 |
| gene-AT3C | 8.456442 | 9.12306  | 10.28226 | 6.924527 | 6.922732 | 7.766985 | 8.926286 | 8.536548 |



|            |          |          |          |          |          |          |          |          |
|------------|----------|----------|----------|----------|----------|----------|----------|----------|
| gene-AT2C  | 17.51337 | 15.88831 | 17.48916 | 11.44856 | 12.30462 | 12.17876 | 12.66762 | 13.0288  |
| gene-AT4C  | 55.14987 | 55.39098 | 55.05407 | 43.87233 | 42.90151 | 44.27857 | 112.7046 | 116.3686 |
| gene-AT1C  | 537.2159 | 568.6733 | 542.1718 | 381.9486 | 381.9943 | 379.2188 | 230.4551 | 218.371  |
| gene-AT4C  | 0.671782 | 0.800951 | 1.07228  | 0.481318 | 0.862755 | 0.82203  | 0.47864  | 0.593258 |
| gene-AT5C  | 0.67702  | 0.447094 | 0.530117 | 1.169046 | 1.157151 | 1.11153  | 0.951784 | 1.235932 |
| gene-AT2C  | 4.461024 | 4.417551 | 4.928227 | 0.860973 | 0.521069 | 1.072767 | 10.29235 | 10.34632 |
| gene-AT2C  | 5.13204  | 6.043487 | 5.324806 | 6.223239 | 4.721416 | 4.927636 | 2.34548  | 2.133086 |
| gene-AT2C  | 4.523165 | 4.063172 | 4.608689 | 6.804307 | 6.242576 | 6.735437 | 8.789603 | 7.151226 |
| gene-AT2C  | 1.024301 | 1.456578 | 1.145507 | 1.738258 | 1.145694 | 1.200698 | 0.317392 | 0.718743 |
| gene-AT2C  | 152.2312 | 153.2316 | 150.1989 | 141.6195 | 137.5645 | 141.4501 | 245.0692 | 251.3292 |
| gene-AT1C  | 11.47147 | 11.77774 | 11.27517 | 6.402511 | 5.543926 | 6.057065 | 15.21361 | 18.12247 |
| gene-AT4C  | 416.3971 | 396.7563 | 409.7494 | 434.8535 | 435.4029 | 429.673  | 808.7984 | 794.7934 |
| gene-AT2C  | 6.131416 | 6.259094 | 6.626496 | 7.586107 | 6.696316 | 8.098748 | 3.66983  | 4.709317 |
| gene-AT4C  | 1.378419 | 1.023662 | 1.459245 | 0.823638 | 1.044598 | 1.096715 | 2.568912 | 4.367607 |
| gene-AT1C  | 4.49111  | 4.616091 | 3.850031 | 14.80106 | 15.50402 | 14.84932 | 4.412369 | 4.389649 |
| gene-AT1C  | 2.392013 | 3.311913 | 2.708278 | 2.398276 | 1.690792 | 2.815307 | 6.181252 | 4.711713 |
| gene-AT3C  | 6.835927 | 7.915412 | 5.845438 | 5.08817  | 5.356828 | 6.180277 | 8.793805 | 9.967205 |
| gene-AT4C  | 396.2083 | 386.6392 | 406.5569 | 262.5531 | 269.7531 | 261.142  | 578.0612 | 592.4223 |
| gene-AT3C  | 22.18345 | 13.28867 | 16.58914 | 4.065372 | 5.448948 | 4.885871 | 7.280633 | 6.804192 |
| gene-AT5C  | 0.693469 | 0.92799  | 0.566852 | 0.452642 | 0.8172   | 0.402162 | 0.881161 | 0.519687 |
| gene-AT2C  | 10.44895 | 9.175113 | 11.4278  | 3.456123 | 3.75614  | 4.694523 | 2.441341 | 2.053224 |
| gene-AT4C  | 19.61635 | 18.26852 | 17.85512 | 22.68274 | 19.77458 | 21.45285 | 11.16617 | 9.379271 |
| gene-AT1C  | 5.490916 | 5.517745 | 5.015886 | 2.733232 | 3.087035 | 2.758796 | 2.575398 | 2.744627 |
| gene-AT5C  | 1.870519 | 2.23932  | 2.128788 | 1.233188 | 1.355428 | 0.853193 | 0.732791 | 0.448318 |
| Arabidopsi | 0.700272 | 0.621944 | 0.826173 | 1.211466 | 1.599987 | 1.444307 | 0.249054 | 0.055155 |
| gene-AT5C  | 14.03884 | 12.15471 | 14.16475 | 14.20115 | 13.30639 | 14.17399 | 24.36341 | 22.8251  |
| gene-AT5C  | 4.036821 | 3.937459 | 3.890544 | 2.330865 | 2.584548 | 2.687216 | 1.575956 | 1.396462 |
| gene-AT3C  | 18.45762 | 19.69478 | 20.88239 | 30.94524 | 30.0309  | 31.5299  | 11.37339 | 11.28582 |
| gene-AT3C  | 117.5079 | 123.1923 | 123.9459 | 24.86052 | 24.67261 | 24.14521 | 122.8663 | 128.3839 |
| gene-AT2C  | 1.026496 | 1.001045 | 1.198346 | 1.852634 | 1.448467 | 2.172428 | 2.059797 | 1.649807 |
| gene-AT4C  | 30.55834 | 33.102   | 30.49542 | 22.74351 | 23.63365 | 22.78575 | 63.60184 | 65.91149 |
| gene-AT4C  | 11.80558 | 11.6925  | 11.66847 | 6.517724 | 6.743153 | 6.564288 | 18.23133 | 18.24253 |
| gene-AT1C  | 1.205166 | 1.036992 | 0.67758  | 3.818159 | 2.929932 | 2.858522 | 1.652047 | 2.102096 |
| gene-AT2C  | 2.17053  | 2.517645 | 3.46753  | 2.702575 | 4.251738 | 4.058024 | 3.875403 | 4.323164 |
| gene-AT1C  | 701.4609 | 721.9219 | 688.3069 | 349.7032 | 340.45   | 354.8841 | 1193.728 | 1098.193 |
| gene-AT3C  | 1.408308 | 1.720192 | 1.364008 | 2.908077 | 3.343205 | 2.466696 | 0.484422 | 0.712835 |
| gene-AT2C  | 80.43273 | 82.79746 | 78.43189 | 61.99706 | 64.16756 | 60.72962 | 32.2113  | 30.5942  |
| gene-AT1C  | 1.799375 | 2.696061 | 2.301907 | 0.816905 | 0.820257 | 1.171462 | 3.826809 | 4.086267 |
| gene-AT3C  | 15.01763 | 15.13265 | 16.47446 | 20.97651 | 20.42033 | 19.426   | 4.567247 | 5.411315 |
| gene-AT1C  | 3.702962 | 3.641672 | 4.973669 | 2.874084 | 3.250886 | 3.957595 | 7.994181 | 6.230493 |
| gene-AT5C  | 2.273171 | 1.952884 | 2.354702 | 6.089221 | 4.766151 | 5.319102 | 1.201052 | 1.565272 |
| gene-AT4C  | 29.69199 | 28.68432 | 27.7717  | 23.62373 | 24.78    | 22.16011 | 9.393859 | 12.92394 |
| gene-AT3C  | 2.361445 | 2.649125 | 2.664088 | 1.827313 | 1.813318 | 2.000171 | 4.044618 | 4.284119 |
| gene-AT4C  | 6.400666 | 6.51952  | 5.030545 | 5.637391 | 6.795268 | 5.929463 | 1.768231 | 2.308987 |
| gene-AT5C  | 10.65338 | 10.42657 | 11.58532 | 21.86802 | 23.30934 | 22.50743 | 3.156394 | 2.289712 |
| gene-AT3C  | 39.55809 | 41.56162 | 39.20791 | 30.54185 | 29.55047 | 31.74308 | 61.39726 | 62.772   |
| gene-AT3C  | 0.837985 | 0.708286 | 0.661656 | 1.110355 | 1.73248  | 1.112473 | 0.351628 | 0.33659  |
| gene-AT5C  | 2.818756 | 2.159901 | 2.290793 | 2.339775 | 2.404322 | 2.471767 | 5.373227 | 5.419357 |
| gene-AT4C  | 0.090081 | 0.129499 | 0.306017 | 0.722624 | 0.762791 | 0.694689 | 0.352078 | 0.237258 |
| gene-AT3C  | 17.8156  | 15.69126 | 17.2008  | 22.76017 | 23.13603 | 23.68945 | 9.421322 | 10.19328 |
| gene-AT5C  | 12.0767  | 12.52963 | 12.28364 | 22.53613 | 21.83641 | 21.8723  | 9.883612 | 12.30536 |

|           |          |          |          |          |          |          |          |          |
|-----------|----------|----------|----------|----------|----------|----------|----------|----------|
| gene-AT5C | 23.41314 | 23.66249 | 23.85634 | 17.9171  | 16.11589 | 15.32553 | 29.04159 | 30.96269 |
| gene-AT5C | 0.97237  | 1.925623 | 1.723577 | 2.995618 | 1.885661 | 1.931267 | 0.662484 | 1.032484 |
| gene-AT4C | 3.117235 | 2.247694 | 3.088455 | 1.744436 | 2.090875 | 2.265351 | 1.667823 | 1.603185 |
| gene-AT1C | 6.267839 | 6.787787 | 5.604278 | 3.513296 | 4.41855  | 3.035654 | 9.624901 | 8.265309 |
| gene-AT3C | 0.388773 | 0.272219 | 0.331682 | 2.349538 | 1.970857 | 1.196778 | 0        | 0.341603 |
| gene-AT5C | 1.885922 | 2.022597 | 2.008637 | 1.135519 | 1.013805 | 1.245229 | 2.604623 | 2.763121 |
| gene-AT5C | 0.95985  | 0.733216 | 0.773068 | 0.650683 | 0.870083 | 0.646287 | 2.058341 | 2.078472 |
| gene-AT2C | 17.08058 | 13.90353 | 13.14269 | 19.88515 | 15.3468  | 19.01654 | 24.54408 | 29.40697 |
| gene-AT1C | 2.936852 | 2.877512 | 2.829986 | 5.563251 | 3.789574 | 4.55574  | 0.73118  | 0.877799 |
| gene-AT5C | 45.47095 | 45.64626 | 43.34871 | 31.08719 | 29.81072 | 32.58532 | 14.24524 | 14.80228 |
| gene-AT5C | 1.141013 | 2.346445 | 2.095099 | 1.872652 | 1.461603 | 2.796101 | 4.251349 | 2.907229 |
| gene-AT1C | 19.16346 | 18.34872 | 20.11586 | 20.48892 | 20.80533 | 19.11259 | 8.683322 | 8.984544 |
| gene-AT5C | 0.982607 | 1.4687   | 1.401837 | 0.78427  | 0.594118 | 0.688978 | 2.24911  | 2.650074 |
| gene-AT2C | 67.45992 | 67.81014 | 68.33207 | 61.94505 | 54.64901 | 61.53212 | 12.72593 | 15.46993 |
| gene-AT1C | 166.9745 | 165.486  | 164.8388 | 136.3647 | 141.3816 | 136.8046 | 290.8048 | 293.2681 |
| gene-AT4C | 46.60503 | 46.39792 | 49.03932 | 29.28272 | 30.15428 | 30.25836 | 38.22801 | 39.24059 |
| gene-AT3C | 1.794956 | 1.867628 | 1.228484 | 2.925152 | 2.486446 | 2.613382 | 1.3185   | 0.996655 |
| gene-AT2C | 9.356    | 8.062889 | 7.115009 | 20.12398 | 20.5662  | 22.19478 | 8.009178 | 6.997319 |
| gene-AT4C | 6.499077 | 5.487915 | 6.393802 | 8.011118 | 7.157001 | 7.056001 | 7.926638 | 7.23478  |
| gene-AT3C | 0.642506 | 1.774063 | 0.287767 | 3.052711 | 2.323984 | 3.858774 | 0.442819 | 0.729837 |
| gene-AT4C | 16.94955 | 16.12445 | 15.07495 | 16.51023 | 19.56125 | 16.13953 | 20.26278 | 19.44791 |
| gene-AT1C | 1.248101 | 1.071684 | 1.455325 | 1.198056 | 1.121413 | 0.642302 | 1.317121 | 1.253805 |
| gene-AT2C | 620.0544 | 710.787  | 540.2836 | 1110.209 | 1142.422 | 1222.181 | 406.6383 | 339.7651 |
| gene-AT1C | 9.031447 | 8.403473 | 9.34225  | 4.685935 | 4.455356 | 4.525943 | 1.629598 | 1.42927  |
| gene-AT4C | 12.88199 | 11.42147 | 13.47482 | 8.771293 | 7.39682  | 8.669809 | 20.51116 | 19.01487 |
| gene-AT1C | 6.386906 | 5.640092 | 5.905949 | 8.560854 | 8.830389 | 9.145739 | 5.293862 | 6.164371 |
| gene-AT3C | 0.814021 | 1.046653 | 0.94678  | 2.034633 | 1.653045 | 2.466877 | 0.361445 | 0.053825 |
| gene-AT3C | 0.483249 | 0.206405 | 0.210947 | 0.503384 | 0.553987 | 0.344115 | 0.107272 | 0.327824 |
| gene-AT5C | 0.646134 | 1.299779 | 0.483038 | 0.260802 | 0.072571 | 0.064141 | 1.666348 | 2.269779 |
| gene-AT1C | 13.09607 | 12.04113 | 12.78414 | 5.749463 | 6.107334 | 6.268144 | 8.073825 | 7.181286 |
| gene-AT4C | 5.782016 | 5.039573 | 4.931261 | 8.274399 | 8.000656 | 8.299206 | 11.97827 | 10.23387 |
| gene-AT2C | 2.938659 | 2.364412 | 2.887213 | 3.140017 | 2.982226 | 2.92249  | 1.590482 | 1.814748 |
| gene-AT1C | 16.20615 | 16.33092 | 16.12709 | 11.8609  | 11.18512 | 11.4514  | 16.1623  | 15.81949 |
| gene-AT2C | 10.25169 | 9.680555 | 9.973953 | 14.87624 | 14.64511 | 13.91865 | 9.223661 | 14.02333 |
| gene-AT3C | 6.479177 | 7.196778 | 6.471393 | 9.70776  | 9.26205  | 8.544481 | 2.773379 | 2.339648 |
| gene-AT1C | 5.570916 | 4.599724 | 6.576946 | 7.066562 | 6.323493 | 7.039413 | 3.471968 | 2.485702 |
| gene-AT2C | 3.957045 | 3.45887  | 3.863225 | 2.130144 | 3.059254 | 2.96419  | 1.334146 | 1.855422 |
| gene-AT4C | 4.272417 | 4.746243 | 4.264882 | 12.68937 | 14.74482 | 14.29626 | 3.60694  | 2.108745 |
| gene-AT4C | 14.56108 | 16.30905 | 16.63862 | 30.68188 | 27.83306 | 29.42079 | 8.33629  | 9.48033  |
| gene-AT2C | 3.334001 | 4.956893 | 5.324556 | 13.0999  | 15.15072 | 12.65278 | 1.9619   | 2.685014 |
| gene-AT5C | 1.340914 | 1.63245  | 1.325712 | 1.672811 | 1.722212 | 1.352375 | 0.603803 | 0.454521 |
| gene-AT5C | 27.22579 | 25.94363 | 27.26171 | 20.26536 | 22.11102 | 22.18728 | 21.0774  | 21.91494 |
| gene-AT2C | 0.948778 | 1.279296 | 1.370593 | 1.047464 | 0.645865 | 1.19258  | 2.812539 | 3.456555 |
| gene-AT2C | 0.5073   | 1.00862  | 0.623836 | 1.782227 | 2.023572 | 2.347634 | 0.778063 | 0.606242 |
| gene-AT2C | 45.00979 | 42.15418 | 43.20371 | 34.01793 | 31.77536 | 34.96638 | 61.9605  | 60.60478 |
| gene-AT5C | 1.509876 | 1.250726 | 1.451671 | 1.234802 | 1.294743 | 1.033268 | 2.486545 | 2.152742 |
| gene-AT1C | 3.247479 | 3.844792 | 4.120944 | 3.034509 | 3.40796  | 3.576281 | 6.833296 | 6.989644 |
| gene-AT2C | 14.70715 | 14.84643 | 14.36869 | 9.710325 | 10.26599 | 11.92993 | 4.019005 | 4.659944 |
| gene-AT1C | 2.165148 | 1.801837 | 1.640508 | 2.931564 | 2.339859 | 2.425841 | 0.928542 | 0.980294 |
| gene-AT1C | 9.003441 | 9.035793 | 8.973931 | 8.058654 | 9.067487 | 8.921029 | 3.636699 | 4.244158 |
| gene-AT5C | 16.05483 | 14.26297 | 16.61507 | 13.16502 | 12.06508 | 12.14951 | 5.89375  | 6.223263 |

|            |          |          |          |          |          |          |          |          |
|------------|----------|----------|----------|----------|----------|----------|----------|----------|
| gene-AT5C  | 6.055319 | 6.594903 | 5.412841 | 3.711195 | 3.972771 | 3.147644 | 2.478438 | 2.286888 |
| Arabidopsi | 2.49226  | 2.433459 | 2.541064 | 1.891761 | 1.405546 | 1.580117 | 1.16099  | 1.188271 |
| gene-AT5C  | 126.8465 | 123.427  | 127.5245 | 86.96305 | 87.84764 | 87.53741 | 35.8797  | 37.05698 |
| gene-AT3C  | 3.912624 | 4.11727  | 4.626282 | 6.08637  | 5.855258 | 6.232728 | 3.72564  | 3.754433 |
| gene-AT2C  | 21.9522  | 23.44697 | 25.4913  | 23.53028 | 19.67305 | 20.51448 | 35.65052 | 37.92588 |
| gene-AT4C  | 3.451135 | 3.206448 | 3.106462 | 2.384062 | 1.952452 | 3.117503 | 5.532018 | 5.855425 |
| gene-AT2C  | 0.524266 | 1.058905 | 1.104479 | 0.858976 | 0.764814 | 0.76339  | 2.047675 | 2.393052 |
| gene-AT1C  | 8.278636 | 8.158648 | 8.17901  | 4.261986 | 4.670125 | 4.429717 | 1.364854 | 1.217023 |
| gene-AT4C  | 1.810817 | 2.259207 | 2.540149 | 2.186858 | 2.08235  | 1.959949 | 0.273852 | 0.122018 |
| gene-AT1C  | 362.4831 | 347.8598 | 365.7802 | 468.9038 | 458.4762 | 457.108  | 193.8155 | 198.8094 |
| gene-AT5C  | 3.049614 | 3.704468 | 3.400795 | 1.08508  | 0.864679 | 0.821817 | 0.7371   | 0.406498 |
| gene-AT3C  | 2.77002  | 2.571223 | 2.244144 | 4.4488   | 3.903186 | 3.733803 | 0.842207 | 0.944402 |
| gene-AT1C  | 5.483699 | 4.22093  | 5.513515 | 5.414992 | 4.851832 | 6.366099 | 0.86978  | 0.700383 |
| gene-AT5C  | 15.16698 | 15.71951 | 16.51884 | 11.53306 | 12.32044 | 12.13787 | 6.290338 | 6.627319 |
| gene-AT4C  | 4.471108 | 3.525779 | 4.680868 | 5.534182 | 4.635056 | 4.850489 | 5.098528 | 5.861804 |
| gene-AT4C  | 0.656241 | 0.533375 | 0.790494 | 1.585628 | 1.73622  | 1.877497 | 1.078641 | 0.9326   |
| gene-AT3C  | 0.938263 | 0.664148 | 0.613781 | 0.291717 | 0.299848 | 0.181576 | 1.758982 | 2.081726 |
| gene-AT1C  | 6.979335 | 7.244949 | 6.6772   | 6.655957 | 5.882953 | 6.667232 | 1.22174  | 1.542005 |
| gene-AT3C  | 14.24276 | 18.26369 | 15.68477 | 16.91628 | 17.52075 | 18.82665 | 24.66441 | 23.33181 |
| gene-AT5C  | 73.19463 | 70.19332 | 72.17073 | 46.35924 | 47.23534 | 46.36962 | 93.76847 | 95.45866 |
| gene-AT1C  | 0.96464  | 0.513189 | 0.628636 | 0.870144 | 0.868319 | 0.859717 | 0.727592 | 1.060566 |
| gene-AT5C  | 26.73026 | 31.85535 | 28.98877 | 16.9034  | 16.57141 | 15.28437 | 11.13571 | 12.38255 |
| gene-AT5C  | 29.99823 | 30.46063 | 29.56933 | 28.99021 | 25.2298  | 29.49557 | 31.57167 | 32.11901 |
| gene-AT1C  | 22.46097 | 21.74092 | 22.51117 | 16.75774 | 15.56758 | 15.05297 | 29.93394 | 31.22266 |
| gene-AT5C  | 103.5845 | 103.6613 | 104.221  | 63.36479 | 65.50069 | 60.9777  | 121.6187 | 121.9539 |
| gene-AT5C  | 7.387441 | 8.300227 | 8.252752 | 6.625086 | 6.922981 | 6.148942 | 2.672403 | 2.947444 |
| gene-AT2C  | 0.58441  | 0.532032 | 0.668235 | 0.233272 | 0.20205  | 0.162783 | 0.156616 | 0.031637 |
| gene-AT1C  | 5.500931 | 5.282145 | 4.647773 | 3.949638 | 3.003764 | 3.730913 | 7.147053 | 6.93197  |
| gene-AT4C  | 39.71992 | 42.84397 | 42.12211 | 40.37769 | 45.1017  | 40.26462 | 52.25851 | 51.64216 |
| gene-AT4C  | 14.0354  | 11.91718 | 12.68154 | 9.821765 | 9.224141 | 9.212437 | 12.13921 | 13.5911  |
| gene-AT5C  | 6.036746 | 4.574651 | 6.111093 | 7.033966 | 8.37449  | 7.67473  | 1.692341 | 2.117533 |
| gene-AT5C  | 21.52    | 20.8529  | 22.1413  | 99.7759  | 101.3334 | 101.1389 | 26.96412 | 29.03788 |
| gene-AT5C  | 38.05953 | 34.9438  | 33.16283 | 31.42076 | 32.9914  | 33.9565  | 66.76744 | 65.08999 |
| gene-AT2C  | 191.2358 | 187.1997 | 184.8127 | 118.2491 | 105.7955 | 116.6837 | 241.2145 | 250.7975 |
| gene-AT5C  | 4.094303 | 3.157459 | 2.626217 | 4.331933 | 3.487091 | 2.955818 | 0.694612 | 0.944188 |
| gene-AT2C  | 1.836826 | 2.021541 | 1.911993 | 1.445805 | 0.948125 | 1.209107 | 5.01968  | 4.330436 |
| Arabidopsi | 4.003049 | 5.713205 | 4.065447 | 1.704813 | 3.154921 | 2.699631 | 7.648062 | 8.177597 |
| gene-AT5C  | 12.87354 | 12.23313 | 12.60332 | 57.97161 | 61.99947 | 61.11355 | 4.095795 | 4.798449 |
| gene-AT2C  | 20.19271 | 19.32827 | 20.22447 | 40.48498 | 37.35929 | 39.16505 | 9.170269 | 9.979162 |
| gene-AT1C  | 6.790776 | 7.058396 | 7.278133 | 5.07791  | 4.955391 | 6.567922 | 3.378515 | 3.852909 |
| gene-AT1C  | 149.3866 | 143.1754 | 151.723  | 55.84519 | 60.15731 | 55.63241 | 116.0429 | 118.1224 |
| gene-AT3C  | 18.67224 | 16.35619 | 15.96022 | 22.43831 | 19.38218 | 20.70635 | 5.373175 | 5.512424 |
| gene-AT1C  | 6.475562 | 5.933938 | 7.796278 | 4.793191 | 5.650301 | 4.807348 | 8.917167 | 10.04403 |
| gene-AT3C  | 12.33922 | 12.69221 | 13.01084 | 8.727282 | 8.321954 | 7.858004 | 9.837724 | 11.22981 |
| gene-AT1C  | 79.31657 | 78.87666 | 79.53079 | 42.11478 | 40.83281 | 40.9286  | 122.5387 | 127.5398 |
| gene-AT2C  | 37.75945 | 32.78443 | 37.19616 | 33.74333 | 34.0492  | 35.0734  | 43.88356 | 43.67713 |
| gene-AT2C  | 0.195081 | 0.107029 | 0.12803  | 0.418722 | 0.596599 | 0.286838 | 0.375355 | 0.154156 |
| gene-AT1C  | 9.491896 | 8.537283 | 9.144043 | 21.30937 | 21.4206  | 20.32972 | 8.913767 | 7.964513 |
| gene-AT2C  | 10.09367 | 9.298612 | 9.625683 | 5.552536 | 6.03907  | 5.673613 | 11.34637 | 12.90883 |
| gene-AT1C  | 1.662028 | 3.336815 | 2.163418 | 0.333592 | 0.640662 | 0.560644 | 2.717487 | 3.116883 |
| gene-AT1C  | 95.57101 | 94.29593 | 97.48817 | 79.16782 | 68.58653 | 71.46886 | 89.73715 | 94.11552 |

|           |          |          |          |          |          |          |          |          |
|-----------|----------|----------|----------|----------|----------|----------|----------|----------|
| gene-AT4C | 41.21684 | 46.22836 | 44.56712 | 17.6183  | 18.00615 | 16.18784 | 46.75805 | 40.19877 |
| gene-AT4C | 82.11666 | 81.93173 | 76.09937 | 62.5847  | 62.49814 | 60.79684 | 138.4508 | 133.1558 |
| gene-AT1C | 0.304006 | 0.396691 | 0.329949 | 0.812441 | 0.698394 | 0.727372 | 0.483179 | 0.404296 |
| gene-AT4C | 7.476727 | 5.707682 | 6.962622 | 7.781412 | 7.888029 | 5.352293 | 8.236459 | 8.087434 |
| gene-AT5C | 4.013877 | 3.385263 | 4.450714 | 2.582009 | 3.429031 | 3.836277 | 0.701933 | 0.560488 |
| gene-AT3C | 20.27665 | 20.09338 | 20.24728 | 18.10847 | 18.12216 | 18.44093 | 28.39822 | 27.95945 |
| gene-AT3C | 919.3613 | 895.446  | 932.6257 | 456.1518 | 453.5345 | 443.3786 | 1424.776 | 1504.628 |
| gene-AT1C | 2.119191 | 2.170099 | 2.368359 | 4.765282 | 5.889124 | 4.431959 | 1.147206 | 1.779596 |
| gene-AT5C | 0.308739 | 0.476913 | 0.538781 | 0.886031 | 0.662629 | 1.137032 | 0.370986 | 0.25402  |
| gene-AT5C | 20.61907 | 20.74934 | 20.87571 | 16.9054  | 16.6363  | 16.0227  | 9.411962 | 10.55292 |
| gene-AT1C | 1.011113 | 1.645265 | 0.409103 | 2.138194 | 1.564403 | 1.433012 | 1.167864 | 0.937045 |
| gene-AT1C | 0.505624 | 0.370596 | 0.495609 | 0.245498 | 0.155472 | 0.159365 | 0.283436 | 0.370788 |
| gene-AT5C | 33.84829 | 31.07452 | 31.03364 | 33.16593 | 30.8871  | 27.09784 | 30.14329 | 32.91393 |
| gene-AT3C | 785.8591 | 801.9742 | 797.2651 | 286.9418 | 294.002  | 294.0622 | 1236.265 | 1208.287 |
| gene-AT3C | 3.527405 | 3.093432 | 1.910418 | 6.063477 | 5.241688 | 4.396131 | 0.309887 | 0.613181 |
| gene-AT2C | 0.639211 | 0.390197 | 0.577806 | 1.660787 | 1.568318 | 1.471874 | 1.386992 | 1.173979 |
| gene-AT5C | 92.29862 | 89.20653 | 96.10018 | 71.44595 | 64.10595 | 65.08054 | 116.4003 | 119.5932 |
| gene-AT5C | 12.35965 | 12.15794 | 10.59082 | 14.02422 | 15.45036 | 15.83157 | 7.433754 | 9.861662 |
| gene-AT3C | 1.347274 | 1.437456 | 1.264694 | 0.927823 | 1.796404 | 1.386528 | 0.360143 | 0.434719 |
| gene-AT3C | 37.58226 | 38.75623 | 38.01141 | 21.13623 | 21.7976  | 20.19397 | 33.85145 | 36.117   |
| gene-AT1C | 2.45992  | 2.38338  | 2.342508 | 7.972903 | 7.802358 | 7.755536 | 2.633072 | 2.815939 |
| gene-AT1C | 7.339802 | 6.603623 | 7.980924 | 3.586009 | 3.595478 | 4.321703 | 2.37922  | 2.838957 |
| gene-AT1C | 6.203971 | 6.002887 | 6.594432 | 15.65156 | 14.84274 | 15.90321 | 6.231972 | 6.427445 |
| gene-AT4C | 9.991045 | 11.78062 | 9.781506 | 18.28582 | 17.61581 | 15.4756  | 7.195181 | 5.623842 |
| gene-AT3C | 1.888546 | 1.403188 | 2.476456 | 1.407449 | 2.023278 | 1.743218 | 1.340742 | 1.453273 |
| gene-AT1C | 1.149654 | 1.283931 | 0.99095  | 2.784169 | 1.658806 | 1.732446 | 0.483094 | 0.399117 |
| gene-AT2C | 38.52628 | 38.55155 | 43.57325 | 39.85772 | 40.78741 | 41.48882 | 52.76039 | 55.66916 |
| gene-AT1C | 158.3359 | 145.9943 | 153.6483 | 91.48004 | 87.58303 | 81.64083 | 286.722  | 313.8248 |
| gene-AT4C | 38.27696 | 33.857   | 37.52383 | 51.91762 | 52.90564 | 48.82886 | 15.22026 | 15.78497 |
| gene-AT1C | 6.534707 | 7.162827 | 6.174543 | 9.019706 | 10.0855  | 12.36106 | 2.79211  | 2.681832 |
| gene-AT1C | 1.876165 | 2.767123 | 2.045043 | 2.416916 | 3.365022 | 1.936427 | 0.806646 | 0.821388 |
| gene-AT4C | 3.634602 | 3.318393 | 4.433058 | 4.555635 | 3.552143 | 4.258049 | 0.9903   | 0.648157 |
| gene-AT1C | 20.91286 | 20.24057 | 22.4413  | 11.33966 | 12.02264 | 10.58298 | 41.01375 | 46.31325 |
| gene-AT3C | 60.97947 | 60.12943 | 62.28574 | 47.58864 | 46.66208 | 45.44084 | 85.06966 | 89.08556 |
| gene-AT4C | 8.047161 | 7.413278 | 7.66364  | 3.430144 | 3.513281 | 3.463618 | 3.918968 | 3.491681 |
| gene-AT3C | 16.41583 | 16.92559 | 17.68802 | 15.50021 | 15.3047  | 15.89521 | 20.97582 | 21.71924 |
| gene-AT3C | 5.461236 | 6.190803 | 5.75913  | 3.700279 | 4.181189 | 3.600697 | 14.72854 | 15.77354 |
| gene-AT2C | 66.43205 | 64.10426 | 71.95508 | 62.38378 | 61.2682  | 62.25169 | 85.89738 | 89.29203 |
| gene-AT4C | 18.27861 | 18.57295 | 18.45004 | 13.16319 | 12.78204 | 14.25154 | 25.99448 | 25.56734 |
| gene-AT3C | 28.47002 | 31.56014 | 26.09761 | 83.67667 | 74.68392 | 75.77112 | 25.58962 | 24.87991 |
| gene-AT2C | 70.01426 | 67.98453 | 71.31205 | 95.70275 | 94.61889 | 97.10127 | 105.0337 | 103.9315 |
| gene-AT5C | 50.14328 | 48.70952 | 51.04548 | 39.91939 | 38.7827  | 39.46318 | 60.70429 | 65.8725  |
| gene-AT5C | 7.216521 | 9.37993  | 8.654721 | 17.70356 | 21.17466 | 19.08166 | 11.3965  | 11.19784 |
| gene-AT4C | 0.973013 | 0.720081 | 0.527276 | 1.335332 | 1.500602 | 1.676229 | 0.274333 | 0.399207 |
| gene-AT3C | 15.74478 | 17.14239 | 17.64326 | 17.77945 | 16.97977 | 17.83885 | 6.499101 | 7.205234 |
| gene-AT1C | 10.77697 | 10.31643 | 11.62988 | 13.62568 | 15.35334 | 14.99025 | 7.345212 | 7.324544 |
| gene-AT3C | 56.37514 | 54.18464 | 53.55273 | 42.80648 | 46.83576 | 48.60165 | 80.76148 | 86.52853 |
| gene-AT2C | 0.216538 | 0.132556 | 0.067178 | 0.119382 | 0.505294 | 0.060672 | 0        | 0.247852 |
| gene-AT2C | 3.461219 | 2.594958 | 3.833951 | 2.808543 | 2.141948 | 2.152918 | 3.989158 | 4.923474 |
| gene-AT2C | 6.425911 | 5.752645 | 5.303263 | 4.255326 | 5.64178  | 3.627085 | 7.553782 | 6.972583 |
| gene-AT4C | 4.351242 | 3.496267 | 5.000601 | 7.228852 | 7.192391 | 7.924044 | 8.420081 | 5.694906 |

|           |          |          |          |          |          |          |          |          |
|-----------|----------|----------|----------|----------|----------|----------|----------|----------|
| gene-AT3C | 17.09251 | 17.36399 | 18.20445 | 22.91959 | 22.72769 | 23.38579 | 23.83687 | 24.92921 |
| gene-AT4C | 11.56876 | 10.00099 | 10.8545  | 9.120092 | 9.832742 | 9.145195 | 22.91505 | 21.90739 |
| gene-AT2C | 0.425813 | 0.224597 | 0.231965 | 0.466257 | 0.540697 | 0.611156 | 0.9875   | 0.233695 |
| gene-AT5C | 5.386757 | 4.753147 | 5.433768 | 3.113527 | 2.950438 | 3.609547 | 11.26956 | 9.946786 |
| gene-AT5C | 14.18578 | 11.95428 | 14.58602 | 12.54789 | 12.03277 | 13.15478 | 22.92659 | 25.12108 |
| gene-AT1C | 5.835006 | 4.734197 | 5.024465 | 6.737191 | 6.636683 | 6.303292 | 3.204548 | 3.553498 |
| gene-AT3C | 7.374196 | 5.850433 | 5.590198 | 11.39654 | 9.461832 | 10.9518  | 15.42643 | 16.05443 |
| gene-AT3C | 0.990314 | 1.051455 | 1.196071 | 1.382846 | 1.156937 | 1.374981 | 2.105927 | 1.531843 |
| gene-AT1C | 1.855473 | 1.622769 | 1.490801 | 1.054462 | 2.064736 | 1.496171 | 5.564734 | 4.715713 |
| gene-AT2C | 2.819409 | 2.398252 | 3.706004 | 1.491229 | 2.582088 | 2.461064 | 6.665349 | 6.294349 |
| gene-AT5C | 47.03881 | 45.57107 | 47.7165  | 19.77171 | 19.39184 | 19.93304 | 12.03341 | 14.02865 |
| gene-AT5C | 0.893208 | 0.984244 | 0.783224 | 1.046294 | 0.870201 | 0.903347 | 0        | 0.322542 |
| gene-AT1C | 0.307632 | 0.38595  | 0.132905 | 0.477335 | 0.743768 | 1.220869 | 0.538722 | 0.479495 |
| gene-AT2C | 0.272802 | 0.197417 | 0.097243 | 0        | 0        | 0.077836 | 0.019558 | 0        |
| gene-AT1C | 2.944931 | 4.027491 | 2.917736 | 2.669385 | 3.924633 | 4.617502 | 6.662337 | 5.54037  |
| gene-AT1C | 783.6026 | 786.6204 | 799.6424 | 382.6951 | 389.5115 | 387.8348 | 1724.682 | 1758.144 |
| gene-AT4C | 3.317979 | 2.548559 | 2.773538 | 2.270852 | 4.605694 | 2.881025 | 5.916074 | 5.199506 |
| gene-AT3C | 8.387747 | 7.901363 | 6.819718 | 3.334312 | 3.555003 | 3.443428 | 4.130612 | 3.261199 |
| gene-AT5C | 11.2935  | 12.70035 | 14.33481 | 12.44527 | 10.26198 | 12.53383 | 3.447585 | 4.345225 |
| gene-AT2C | 8.089089 | 8.524127 | 8.014676 | 21.00589 | 21.95511 | 18.56245 | 4.25915  | 3.979581 |
| gene-AT5C | 13.78899 | 14.67539 | 14.94609 | 25.60293 | 23.62778 | 25.27492 | 4.880031 | 6.48875  |
| gene-AT5C | 5.433857 | 5.409002 | 5.838397 | 2.68562  | 1.948594 | 1.722923 | 6.23803  | 6.455358 |
| gene-AT5C | 3.741264 | 5.364058 | 4.916783 | 3.018642 | 1.272665 | 3.105386 | 7.593239 | 6.722847 |
| gene-AT5C | 0.844985 | 0.66626  | 0.91274  | 0.410684 | 0.505676 | 0.283006 | 1.681464 | 1.489783 |
| gene-AT1C | 1.813368 | 1.614961 | 1.676532 | 2.483348 | 1.728761 | 3.254529 | 1.157195 | 1.506801 |
| gene-AT4C | 4.013711 | 3.363564 | 3.556629 | 2.285098 | 1.243475 | 1.69229  | 6.728111 | 6.345376 |
| gene-AT4C | 12.75143 | 11.84142 | 11.90552 | 6.153789 | 6.101156 | 6.512779 | 9.89388  | 9.71098  |
| gene-AT3C | 11.47704 | 12.27402 | 10.7783  | 19.0128  | 12.5077  | 15.74667 | 20.8132  | 22.56587 |
| gene-AT1C | 25.36885 | 23.51117 | 24.42431 | 11.50041 | 12.6978  | 12.37105 | 46.50383 | 49.53341 |
| gene-AT4C | 13.73539 | 14.06727 | 15.19007 | 11.19269 | 10.34378 | 9.465318 | 18.07671 | 19.2085  |
| gene-AT3C | 25.92598 | 23.30182 | 26.6896  | 23.32075 | 24.26653 | 23.86222 | 26.13956 | 26.25382 |
| gene-AT1C | 14.42484 | 13.2811  | 13.99879 | 7.716048 | 7.505243 | 7.558117 | 15.70507 | 16.71261 |
| gene-AT2C | 24.58953 | 24.60576 | 25.0306  | 18.24635 | 18.81127 | 18.73118 | 30.81026 | 29.7407  |
| gene-AT5C | 13.36886 | 15.13061 | 15.31191 | 11.89588 | 11.9492  | 10.25278 | 41.81622 | 34.58239 |
| gene-AT5C | 0.434913 | 0.1595   | 0        | 0.63839  | 0.417977 | 0.696443 | 0.319774 | 0.206584 |
| gene-AT2C | 6.027102 | 5.812105 | 6.586292 | 5.740233 | 6.462245 | 7.073871 | 9.704574 | 8.008025 |
| gene-AT4C | 12.30013 | 13.66638 | 11.41078 | 29.26914 | 26.67578 | 28.15204 | 26.76106 | 30.56996 |
| gene-AT3C | 7.93918  | 10.20983 | 8.059674 | 14.81502 | 13.61261 | 15.34074 | 6.199609 | 8.221647 |
| gene-AT3C | 0.39449  | 0.943912 | 0.51393  | 0.291608 | 0.247669 | 0.4465   | 0.945997 | 0.813917 |
| gene-AT1C | 0.652395 | 0.571197 | 0.4428   | 0.36593  | 0.481483 | 0.309835 | 0.039244 | 0        |
| gene-AT1C | 1.65034  | 1.651298 | 1.896771 | 0.806534 | 0.717114 | 1.021632 | 0.691939 | 0.771222 |
| gene-AT1C | 19.54376 | 18.47177 | 20.10699 | 13.50992 | 12.62417 | 11.07687 | 7.603783 | 7.385745 |
| gene-AT4C | 3.344014 | 2.831634 | 3.648299 | 1.919295 | 2.393267 | 2.841915 | 5.926574 | 4.577749 |
| gene-AT4C | 7.97701  | 8.164492 | 7.675161 | 10.8215  | 11.40616 | 10.97604 | 5.735708 | 6.655904 |
| gene-AT1C | 6.586256 | 8.274394 | 7.822121 | 12.59618 | 11.69808 | 12.38248 | 3.540994 | 3.027524 |
| gene-AT5C | 3.200341 | 3.744911 | 3.545495 | 4.708302 | 5.734882 | 4.790856 | 4.402586 | 4.028007 |
| gene-AT5C | 8.259137 | 7.527847 | 7.643946 | 12.46423 | 10.06062 | 13.12676 | 7.522826 | 6.374233 |
| gene-AT4C | 1.228143 | 1.11886  | 0.693031 | 0.615396 | 0.321054 | 0.603996 | 0.442087 | 0.227383 |
| gene-AT3C | 48.45576 | 49.5059  | 51.32826 | 37.38973 | 34.22551 | 32.77938 | 76.55595 | 79.66728 |
| gene-AT1C | 3.386232 | 3.059859 | 2.991579 | 2.280582 | 1.407077 | 1.596828 | 0.501959 | 0.976341 |
| gene-AT5C | 19.00883 | 19.35573 | 18.1087  | 11.32487 | 10.11697 | 11.99807 | 29.38086 | 31.44404 |

|           |          |          |          |          |          |          |          |          |
|-----------|----------|----------|----------|----------|----------|----------|----------|----------|
| gene-AT3C | 20.93445 | 19.25357 | 19.80751 | 33.965   | 34.38283 | 35.3713  | 22.7926  | 22.38913 |
| gene-AT3C | 19.70181 | 19.38356 | 21.23718 | 26.5189  | 24.66548 | 24.31117 | 16.06685 | 17.15266 |
| gene-AT5C | 1.320125 | 0.941742 | 1.562105 | 0.164546 | 0.439874 | 0.224371 | 0        | 0        |
| gene-AT3C | 0.648528 | 0.878685 | 0.918865 | 1.087976 | 1.345451 | 1.042371 | 2.07735  | 2.075615 |
| gene-AT1C | 0.772454 | 1.332855 | 1.293001 | 3.123489 | 2.571264 | 2.796883 | 1.421332 | 1.143153 |
| gene-AT1C | 0.726721 | 0.888947 | 0.657356 | 3.012524 | 2.336848 | 2.90643  | 0.329441 | 0.445854 |
| gene-AT3C | 4.009736 | 3.645608 | 3.436778 | 2.641669 | 3.298706 | 2.678143 | 1.641711 | 1.618957 |
| gene-AT1C | 0.276649 | 0.372783 | 0.721594 | 0.60882  | 0.562332 | 0.608899 | 0.378214 | 0.396597 |
| gene-AT2C | 6.8606   | 7.079365 | 8.038382 | 6.66208  | 6.623395 | 6.011317 | 14.93196 | 14.27745 |
| gene-AT2C | 7.154418 | 5.499792 | 5.993898 | 6.902262 | 5.718114 | 6.475571 | 4.724942 | 5.459857 |
| gene-AT1C | 1.323068 | 0.846778 | 0.608627 | 0.37691  | 0.458587 | 0.452115 | 0.09003  | 0.018986 |
| gene-AT1C | 0.400759 | 0.420084 | 0.510491 | 0.809883 | 0.385988 | 0.896108 | 0.03304  | 0        |
| gene-AT4C | 1.2228   | 0.685027 | 1.474209 | 1.522977 | 0.965461 | 1.481216 | 2.630157 | 1.977976 |
| gene-AT5C | 9.095278 | 8.766537 | 8.395645 | 1.952848 | 2.699326 | 2.298584 | 29.0961  | 30.94651 |
| gene-AT4C | 5.343623 | 4.59442  | 5.22202  | 2.655878 | 2.898958 | 3.157698 | 12.60597 | 13.66842 |
| gene-AT2C | 1.089376 | 1.216727 | 0.459822 | 22.99452 | 21.91316 | 23.37021 | 0.210565 | 0.77193  |
| gene-AT3C | 19.02144 | 19.07188 | 18.73447 | 4.521134 | 3.746759 | 4.63429  | 29.69363 | 33.08228 |
| gene-AT5C | 0.672904 | 1.563241 | 0.981959 | 2.656488 | 4.076122 | 4.415142 | 0.386461 | 0.341358 |
| gene-AT5C | 1.745916 | 1.445528 | 2.004885 | 1.797044 | 1.200198 | 2.065833 | 1.940849 | 2.453798 |
| gene-AT1C | 249.2565 | 252.2006 | 218.4039 | 132.5439 | 130.2989 | 132.9316 | 254.0535 | 258.8968 |
| gene-AT2C | 22.23297 | 22.55062 | 19.68716 | 16.06572 | 15.6254  | 17.55358 | 35.37572 | 33.61676 |
| gene-AT1C | 2.020298 | 1.935323 | 2.287903 | 4.393415 | 5.627401 | 4.846103 | 1.871832 | 1.536361 |
| gene-AT5C | 6.282913 | 5.856803 | 6.858243 | 11.90762 | 11.91325 | 12.34955 | 7.928309 | 8.974093 |
| gene-AT4C | 3.163637 | 3.041096 | 2.394043 | 2.360614 | 2.64775  | 3.438791 | 0.790392 | 0.911399 |
| gene-AT1C | 155.2652 | 154.429  | 160.0399 | 99.36787 | 96.14813 | 90.59564 | 279.9815 | 279.9544 |
| gene-AT5C | 1.937553 | 2.291506 | 2.516738 | 1.95202  | 1.087491 | 2.352688 | 9.279765 | 10.78444 |
| gene-AT5C | 3.177078 | 2.814096 | 2.630021 | 0.299438 | 0.482853 | 0.44569  | 0.695451 | 0.627823 |
| gene-AT2C | 21.45308 | 19.64903 | 20.0876  | 23.77144 | 24.48071 | 25.20775 | 27.49974 | 27.43177 |
| gene-AT4C | 2.02405  | 2.604148 | 2.430614 | 2.025789 | 2.459916 | 1.918598 | 0.397311 | 0.704103 |
| gene-AT1C | 73.90603 | 72.82118 | 74.5814  | 49.53416 | 48.97937 | 51.35732 | 86.48037 | 86.66497 |
| gene-AT1C | 0.355659 | 0.432581 | 0.407406 | 0.194093 | 0.470275 | 0.234875 | 0.641948 | 0.686728 |
| gene-AT3C | 54.22675 | 54.79964 | 55.78467 | 37.49628 | 36.26238 | 35.73748 | 20.51421 | 18.79655 |
| gene-AT5C | 1.847671 | 1.696899 | 1.871208 | 0.693125 | 0.652976 | 0.27556  | 0.781102 | 1.113791 |
| gene-AT2C | 1.393348 | 1.018762 | 1.476974 | 3.418525 | 4.720217 | 3.490749 | 2.865029 | 3.084724 |
| gene-AT3C | 6.494452 | 7.771139 | 8.123006 | 8.592382 | 11.10369 | 11.44603 | 17.58635 | 14.64929 |
| gene-AT3C | 8.935867 | 9.583955 | 11.27003 | 9.391514 | 8.784558 | 9.719297 | 13.11485 | 11.35604 |
| gene-AT1C | 19.11244 | 17.49679 | 20.4001  | 29.66455 | 28.20015 | 27.91521 | 10.39035 | 10.97137 |
| gene-AT5C | 341.9061 | 300.5623 | 353.4658 | 210.0841 | 209.5744 | 213.9524 | 544.9723 | 561.9111 |
| gene-AT4C | 1.045785 | 0.709925 | 0.679107 | 1.199155 | 1.314213 | 1.137409 | 1.203914 | 0.794614 |
| gene-AT4C | 168.3738 | 172.3561 | 178.6072 | 129.2197 | 129.6657 | 131.1133 | 303.84   | 305.6659 |
| gene-AT1C | 5.136323 | 5.131844 | 4.94858  | 11.79241 | 10.95663 | 12.32825 | 3.281965 | 3.436498 |
| gene-AT5C | 1.090277 | 1.830624 | 1.724563 | 0.343213 | 0.610942 | 0.697776 | 1.123404 | 1.349978 |
| gene-AT5C | 1.30597  | 1.186484 | 1.109447 | 1.607742 | 1.103869 | 1.342211 | 1.696533 | 1.5103   |
| gene-AT1C | 128.2993 | 126.924  | 127.1563 | 61.89521 | 63.49762 | 62.46694 | 12.88677 | 13.96148 |
| gene-AT1C | 9.305943 | 10.96952 | 11.79888 | 20.25405 | 19.66188 | 20.48234 | 9.669951 | 11.14814 |
| gene-AT3C | 43.34118 | 41.1477  | 41.64436 | 19.01737 | 17.12843 | 17.40338 | 17.20746 | 18.63357 |
| gene-AT2C | 4.163101 | 5.624928 | 4.596141 | 66.07826 | 67.55114 | 70.68294 | 0.479897 | 0.39623  |
| gene-AT1C | 0.824712 | 0.760919 | 1.186561 | 1.337899 | 1.023219 | 1.23789  | 1.536514 | 1.092566 |
| gene-AT4C | 6.380065 | 5.802821 | 5.891254 | 6.283573 | 7.409707 | 6.950397 | 8.143809 | 8.467553 |
| gene-AT5C | 12.12713 | 11.0369  | 10.50607 | 11.24254 | 9.705225 | 9.498029 | 2.462171 | 2.369378 |
| gene-AT5C | 4.682342 | 4.127816 | 5.390112 | 2.518256 | 2.606354 | 2.159622 | 12.31618 | 10.68661 |

|            |          |          |          |          |          |          |          |          |
|------------|----------|----------|----------|----------|----------|----------|----------|----------|
| gene-AT5C  | 17.61079 | 18.69211 | 15.80866 | 15.05749 | 15.20072 | 15.11176 | 7.424667 | 6.675105 |
| gene-AT1C  | 32.79361 | 31.43343 | 36.11113 | 5.184363 | 6.242381 | 5.382589 | 0.206366 | 0.499381 |
| gene-AT5C  | 55.67645 | 52.15791 | 52.7678  | 49.42472 | 49.47805 | 51.3985  | 87.38965 | 90.91779 |
| gene-AT1C  | 4.295147 | 4.727343 | 3.944392 | 3.817099 | 3.811996 | 4.397534 | 4.468772 | 4.298848 |
| gene-AT1C  | 1.43996  | 1.441793 | 1.400154 | 0.333031 | 0.525871 | 0.36346  | 0.705177 | 0.170284 |
| gene-AT3C  | 5.90283  | 4.11993  | 3.212974 | 1.893663 | 1.426548 | 1.098208 | 2.583292 | 2.956834 |
| gene-AT2C  | 30.29912 | 29.57102 | 31.11165 | 29.65628 | 32.27944 | 32.22488 | 40.24599 | 44.9123  |
| gene-AT3C  | 20.49235 | 21.14112 | 21.44368 | 14.26458 | 13.31645 | 11.84624 | 4.679005 | 4.774491 |
| gene-AT5C  | 66.55277 | 66.228   | 68.13735 | 69.68698 | 69.97781 | 68.59093 | 28.81406 | 29.97574 |
| gene-AT1C  | 0.362434 | 0.488068 | 0.42813  | 1.274487 | 0.950446 | 0.734788 | 0.362792 | 0.333937 |
| gene-AT2C  | 1.962573 | 2.249319 | 2.272285 | 0.848946 | 1.149736 | 0.864222 | 2.120203 | 1.994846 |
| gene-AT4C  | 20.35449 | 17.92474 | 18.37353 | 16.46878 | 19.06148 | 16.32964 | 20.19151 | 20.56138 |
| gene-AT3C  | 6.711324 | 6.759814 | 7.088984 | 4.867844 | 6.591175 | 5.991185 | 11.34102 | 10.86619 |
| gene-AT1C  | 240.7986 | 234.4814 | 235.667  | 307.3885 | 307.6559 | 309.0146 | 46.52941 | 46.43369 |
| gene-AT4C  | 12.28943 | 12.56122 | 13.29838 | 10.27537 | 10.79918 | 10.16677 | 15.25655 | 16.38502 |
| gene-AT3C  | 38.75188 | 38.17469 | 38.56078 | 65.56352 | 62.47208 | 65.63836 | 24.3633  | 23.6593  |
| gene-AT4C  | 4.686067 | 3.540443 | 4.13435  | 3.335431 | 2.987249 | 3.188471 | 1.443738 | 1.097228 |
| gene-AT3C  | 25.55147 | 22.75869 | 23.69425 | 20.7859  | 22.07288 | 22.15434 | 45.24974 | 52.38889 |
| gene-AT3C  | 0.721057 | 0.940499 | 1.380149 | 1.968184 | 2.154512 | 2.020995 | 0.850598 | 0.803873 |
| gene-AT1C  | 5.281516 | 3.356191 | 5.506732 | 3.430154 | 2.983466 | 4.116392 | 4.715057 | 5.158159 |
| gene-AT5C  | 22.71726 | 22.36455 | 25.70618 | 19.03171 | 16.61273 | 18.42418 | 35.19059 | 33.48377 |
| gene-AT5C  | 27.39704 | 26.39566 | 28.12829 | 9.4928   | 10.75792 | 9.912785 | 7.915714 | 8.841857 |
| gene-AT3C  | 3.559388 | 4.90009  | 3.896249 | 5.401688 | 5.381039 | 4.319144 | 11.56322 | 12.88504 |
| Arabidopsi | 5.895567 | 5.954571 | 4.363783 | 8.771159 | 8.45599  | 9.224608 | 3.959149 | 3.322808 |
| Arabidopsi | 0.613595 | 1.0024   | 0.446464 | 0.291617 | 0.341008 | 0.890073 | 0.84574  | 0.33246  |
| Arabidopsi | 1.173908 | 1.057159 | 1.209935 | 0.660818 | 1.197729 | 0.890042 | 1.826818 | 1.595901 |
| gene-AT1C  | 2.981282 | 3.36664  | 2.231793 | 2.216501 | 3.185389 | 2.345855 | 5.782481 | 4.832191 |
| gene-AT3C  | 158.1067 | 152.7254 | 162.9474 | 180.7911 | 176.0757 | 168.8718 | 264.8934 | 274.0389 |
| gene-AT5C  | 4.58848  | 4.593529 | 5.402552 | 5.236625 | 5.645905 | 4.969408 | 5.736841 | 6.725476 |
| gene-AT3C  | 0.382057 | 0.732391 | 1.502082 | 1.507915 | 1.223957 | 1.219039 | 1.786662 | 2.049224 |
| gene-AT2C  | 13.30751 | 12.70564 | 13.85319 | 10.00621 | 11.55763 | 11.19907 | 4.070424 | 3.754878 |
| gene-AT1C  | 73.81493 | 72.76679 | 74.25842 | 20.92616 | 22.31509 | 23.98557 | 43.82787 | 45.92025 |
| gene-AT4C  | 0.131333 | 0        | 0.12634  | 1.754734 | 1.190512 | 1.53389  | 0        | 0.733832 |
| gene-AT1C  | 7.101736 | 5.824734 | 6.458468 | 5.369292 | 5.780032 | 5.385154 | 6.199876 | 6.765924 |
| gene-AT4C  | 3.860273 | 2.906802 | 4.431452 | 3.718719 | 4.20642  | 3.458229 | 7.453485 | 8.581224 |
| gene-AT2C  | 4.784545 | 2.618623 | 4.752818 | 6.738464 | 4.70431  | 4.431918 | 5.751335 | 6.469736 |
| gene-AT2C  | 0.526436 | 0.351461 | 0.536162 | 0.125071 | 0.13398  | 0        | 0.052911 | 0.051128 |
| gene-AT3C  | 2.021106 | 1.519971 | 1.682251 | 3.909479 | 3.483311 | 3.892427 | 0.205773 | 0.231274 |
| gene-AT4C  | 0.897948 | 0.818541 | 0.880767 | 0.214942 | 0.355272 | 0.237274 | 0.136259 | 0.230698 |
| gene-AT4C  | 18.42729 | 18.45089 | 20.79254 | 14.92423 | 14.98363 | 14.64032 | 27.47741 | 27.62665 |
| gene-AT4C  | 4.477521 | 2.397067 | 3.186432 | 2.095321 | 1.509522 | 2.036944 | 3.868637 | 4.219197 |
| gene-AT2C  | 3.111109 | 2.521904 | 2.550683 | 0.50615  | 0.201016 | 0.915616 | 0        | 0.035757 |
| gene-AT2C  | 0.331079 | 0.197242 | 0.165106 | 0.116017 | 0.09701  | 0.113779 | 1.472672 | 1.556836 |
| gene-AT1C  | 41.63554 | 40.55565 | 44.64119 | 82.26437 | 90.24649 | 83.70033 | 50.52187 | 52.81387 |
| gene-AT2C  | 59.57925 | 49.90694 | 54.31737 | 46.2626  | 44.14332 | 44.40812 | 72.33157 | 67.33319 |
| gene-AT1C  | 4.690286 | 4.824571 | 4.126006 | 3.466855 | 2.473285 | 2.443947 | 6.041437 | 5.443739 |
| gene-AT4C  | 5.092273 | 4.20243  | 4.185325 | 1.698695 | 2.065386 | 1.634685 | 4.178535 | 4.996105 |
| gene-AT4C  | 523.9338 | 525.0102 | 537.6152 | 282.8349 | 288.9315 | 283.5018 | 833.2572 | 837.7217 |
| gene-AT5C  | 20.565   | 23.63504 | 24.5816  | 24.24292 | 25.30605 | 25.08413 | 25.48793 | 27.67895 |
| gene-AT1C  | 22.4182  | 22.99508 | 23.09491 | 13.07588 | 11.8695  | 13.84184 | 31.30314 | 35.48586 |
| gene-AT2C  | 3.121422 | 3.592559 | 3.047867 | 0.83118  | 0.753571 | 0.724398 | 6.439071 | 7.010168 |

|           |          |          |          |          |          |          |          |          |
|-----------|----------|----------|----------|----------|----------|----------|----------|----------|
| gene-AT1C | 162.2538 | 163.5881 | 170.731  | 187.9568 | 194.5277 | 192.2919 | 72.19527 | 86.57066 |
| gene-AT5C | 3.954685 | 3.596742 | 3.583913 | 2.395095 | 3.09855  | 2.65748  | 2.121862 | 2.504538 |
| gene-AT5C | 9.36162  | 8.201777 | 9.082075 | 10.64491 | 9.229806 | 9.489852 | 2.397554 | 2.394192 |
| gene-AT5C | 3.325092 | 2.019518 | 2.680133 | 4.231546 | 3.610428 | 3.526438 | 1.133617 | 1.08347  |
| gene-AT2C | 0.257714 | 0.489318 | 0.562629 | 7.235216 | 7.489619 | 7.198207 | 2.325524 | 1.754723 |
| gene-AT5C | 4.629109 | 3.58651  | 4.899204 | 1.552037 | 1.812099 | 1.628646 | 0.914753 | 1.007267 |
| gene-AT3C | 76.09411 | 74.20976 | 82.55273 | 71.57719 | 77.07027 | 73.93198 | 12.32046 | 14.41376 |
| gene-AT2C | 19.09051 | 20.00215 | 18.12833 | 67.22643 | 72.64817 | 64.82271 | 2.751622 | 2.923027 |
| gene-AT1C | 9.349182 | 10.68982 | 10.57747 | 15.75268 | 17.16937 | 15.2929  | 8.169862 | 9.961121 |
| gene-AT2C | 3.477    | 4.765403 | 3.253876 | 2.814125 | 3.766664 | 2.515077 | 5.707141 | 4.850367 |
| gene-AT3C | 9.301092 | 11.63627 | 9.396682 | 12.02527 | 13.6021  | 14.7533  | 7.187842 | 8.078134 |
| gene-AT2C | 7.573358 | 5.912681 | 7.303022 | 2.890685 | 2.682306 | 3.008738 | 1.432699 | 1.556231 |
| gene-AT2C | 40.48331 | 40.01228 | 39.6015  | 56.44843 | 56.60624 | 56.31497 | 22.89127 | 24.42504 |
| gene-AT1C | 19.46151 | 20.8045  | 21.14775 | 26.80239 | 24.61985 | 24.49383 | 8.812978 | 8.847969 |
| gene-AT3C | 6.6594   | 5.3593   | 5.51653  | 5.72789  | 4.879524 | 5.078911 | 7.272465 | 8.263706 |
| gene-AT5C | 2.86328  | 3.258856 | 2.326071 | 5.357778 | 6.173171 | 5.578325 | 0.709008 | 1.040012 |
| gene-AT1C | 1.53441  | 1.282958 | 2.066361 | 2.979895 | 3.098738 | 2.38504  | 0.598131 | 0.648345 |
| gene-AT2C | 9.303421 | 7.79881  | 8.110349 | 7.578086 | 7.194734 | 7.55881  | 12.18344 | 12.78801 |
| gene-AT1C | 15.71627 | 15.88249 | 14.79506 | 21.69533 | 23.37821 | 21.60953 | 22.03908 | 24.1265  |
| gene-AT5C | 15.75015 | 15.21471 | 17.05129 | 11.05893 | 10.30283 | 10.08855 | 24.30959 | 24.80465 |
| gene-AT5C | 2.223207 | 2.825501 | 2.115693 | 2.973065 | 2.337415 | 2.668225 | 5.755026 | 5.82597  |
| gene-AT3C | 161.4332 | 157.3938 | 157.0422 | 118.1115 | 114.3456 | 110.9193 | 197.755  | 201.9013 |
| gene-AT3C | 0.212952 | 0.764683 | 0.73845  | 0.71955  | 0.625561 | 0.833606 | 1.214172 | 0.96034  |
| gene-AT1C | 4.228609 | 3.069589 | 4.018181 | 3.615551 | 4.422126 | 4.099173 | 0.532108 | 0.834241 |
| gene-AT4C | 0.796576 | 0.875324 | 1.17566  | 2.430403 | 1.712283 | 1.531444 | 1.867808 | 1.856753 |
| gene-AT5C | 0.985096 | 1.382188 | 1.325422 | 3.937469 | 3.818542 | 4.185797 | 1.75392  | 2.943155 |
| gene-AT5C | 25.58417 | 19.30978 | 23.69493 | 26.50136 | 24.25702 | 22.21648 | 6.798895 | 8.208258 |
| gene-AT1C | 31.45781 | 31.62703 | 34.58397 | 20.59887 | 20.26514 | 21.13721 | 38.42061 | 40.96931 |
| gene-AT5C | 31.34379 | 31.13808 | 30.92725 | 28.88009 | 30.92278 | 29.389   | 46.78248 | 50.51231 |
| gene-AT4C | 30.46455 | 29.25541 | 29.10444 | 30.3384  | 27.32797 | 28.56043 | 18.00443 | 20.32452 |
| gene-AT2C | 11.34382 | 10.57367 | 11.05801 | 9.672748 | 10.28413 | 10.15825 | 14.22031 | 14.64564 |
| gene-AT1C | 39.52008 | 39.30513 | 40.22337 | 24.86442 | 25.16525 | 25.89667 | 61.03981 | 65.75681 |
| gene-AT2C | 21.40647 | 20.50945 | 22.07606 | 5.895873 | 6.452739 | 6.061145 | 2.340116 | 2.984109 |
| gene-AT1C | 20.05703 | 19.8751  | 17.35865 | 15.24465 | 17.92717 | 18.79971 | 26.06325 | 27.00591 |
| gene-AT1C | 154.6185 | 146.7301 | 154.0212 | 18.62216 | 17.26685 | 17.81958 | 1.436544 | 1.75131  |
| gene-AT5C | 3.370832 | 3.659502 | 3.732718 | 4.587662 | 4.449924 | 5.017896 | 1.011879 | 1.515126 |
| gene-AT5C | 76.77007 | 74.54956 | 76.28929 | 40.4404  | 39.89544 | 41.67775 | 53.3219  | 54.94601 |
| gene-AT1C | 1.98244  | 1.877697 | 2.660138 | 1.268805 | 1.021123 | 0.940332 | 4.255325 | 3.114231 |
| gene-AT3C | 6.3901   | 6.10927  | 6.297418 | 3.876988 | 4.295014 | 5.101292 | 7.575742 | 6.849092 |
| gene-AT4C | 1.153699 | 0.804215 | 1.152853 | 2.158265 | 1.617946 | 1.45136  | 0.41394  | 0.680546 |
| gene-AT4C | 33.88406 | 34.10978 | 36.10205 | 31.18133 | 31.2905  | 30.09886 | 49.7012  | 51.23384 |
| gene-AT3C | 0.601229 | 0.57254  | 1.154486 | 1.028168 | 1.245533 | 1.170724 | 1.066754 | 2.061293 |
| gene-AT1C | 11.66148 | 12.2315  | 11.48077 | 10.17591 | 11.22005 | 11.00157 | 15.38326 | 14.59696 |
| gene-AT3C | 5.034379 | 4.853492 | 3.998505 | 4.09279  | 3.200485 | 3.130001 | 3.153928 | 3.925826 |
| gene-AT2C | 35.81742 | 34.28284 | 32.90986 | 26.95278 | 27.76882 | 25.6748  | 43.37683 | 43.68145 |
| gene-AT1C | 6.329335 | 5.378474 | 5.524985 | 5.25061  | 4.867718 | 4.556071 | 8.161811 | 9.588254 |
| gene-AT1C | 0.307613 | 0        | 0.14443  | 14.00228 | 13.20028 | 11.5635  | 0.28005  | 0.418708 |
| gene-AT3C | 0.083137 | 0.098286 | 0.194495 | 0.250298 | 0.27957  | 0.184375 | 0.31824  | 0.28132  |
| gene-AT4C | 2.278666 | 2.193246 | 2.355611 | 3.705489 | 2.622813 | 3.233831 | 1.367171 | 1.609691 |
| gene-AT1C | 69.63335 | 70.53375 | 68.2253  | 89.48246 | 87.63079 | 85.22047 | 23.69092 | 24.80802 |
| gene-AT4C | 4.539042 | 4.087771 | 4.586656 | 5.055958 | 3.832807 | 4.721661 | 5.10219  | 5.446168 |



|            |          |          |          |          |          |          |          |          |
|------------|----------|----------|----------|----------|----------|----------|----------|----------|
| gene-AT1C  | 1.225328 | 1.24131  | 1.20334  | 1.856016 | 2.319634 | 3.50429  | 2.664326 | 2.551933 |
| gene-AT5C  | 9.114548 | 9.231175 | 9.435987 | 6.254893 | 7.588164 | 6.639464 | 14.76795 | 12.7563  |
| gene-AT4C  | 402.096  | 398.6662 | 386.5043 | 226.2164 | 222.554  | 228.6756 | 781.5494 | 798.8557 |
| gene-AT5C  | 12.94079 | 12.49534 | 12.72751 | 6.108362 | 6.14505  | 7.820487 | 19.48381 | 20.18593 |
| gene-AT4C  | 15.87301 | 15.50763 | 16.33688 | 17.91336 | 17.25388 | 18.99362 | 24.12014 | 22.23554 |
| gene-AT1C  | 6.176813 | 5.765864 | 6.644722 | 7.27432  | 6.748689 | 6.481819 | 4.175132 | 3.901726 |
| gene-AT4C  | 405.9173 | 398.7709 | 410.945  | 360.9178 | 358.298  | 352.5428 | 74.35896 | 80.55163 |
| gene-AT5C  | 2.741142 | 2.739842 | 3.475175 | 2.635047 | 1.320153 | 3.118911 | 6.974287 | 7.466816 |
| gene-AT5C  | 4.612885 | 4.447587 | 4.216193 | 1.104569 | 1.23178  | 1.180049 | 0.843062 | 1.089685 |
| gene-AT1C  | 5.356431 | 4.000003 | 5.547916 | 2.459907 | 3.558153 | 3.030041 | 1.73148  | 1.24674  |
| gene-AT3C  | 12.14687 | 10.4391  | 10.71591 | 29.08642 | 30.07545 | 29.19256 | 7.550745 | 8.313967 |
| gene-AT3C  | 0.42945  | 0.421876 | 0.463746 | 0.451258 | 0.336179 | 0.545286 | 0.108615 | 0.074957 |
| gene-AT4C  | 2.517633 | 2.352751 | 1.916035 | 0.500016 | 0.637319 | 0.621369 | 3.023208 | 3.92011  |
| gene-AT2C  | 11.51248 | 12.40904 | 11.88428 | 7.762336 | 7.412898 | 7.961935 | 3.959635 | 4.636321 |
| gene-AT2C  | 7.408848 | 8.10713  | 9.047213 | 15.03451 | 14.78426 | 13.39385 | 3.710323 | 4.078157 |
| gene-AT5C  | 7.907558 | 7.417334 | 6.307829 | 6.94043  | 6.995158 | 6.978879 | 4.886176 | 6.019484 |
| gene-AT1C  | 143.1371 | 138.2856 | 149.7854 | 93.05593 | 90.48529 | 92.16529 | 253.5273 | 256.5565 |
| gene-AT1C  | 2.948173 | 3.826932 | 3.738926 | 3.392555 | 3.671136 | 3.430789 | 0.906484 | 0.910998 |
| gene-AT1C  | 1.32462  | 0.870615 | 1.600721 | 2.187231 | 2.452732 | 2.327527 | 0.73811  | 0.77484  |
| gene-AT1C  | 46.80227 | 47.76479 | 48.22127 | 12.01724 | 12.7286  | 12.3632  | 95.36604 | 93.62963 |
| gene-AT2C  | 0.574855 | 0.901823 | 0.813797 | 1.471825 | 1.593393 | 1.214765 | 0.507186 | 0.431885 |
| gene-AT1C  | 2.935387 | 4.429754 | 3.969375 | 3.4238   | 2.79986  | 2.733334 | 0.856817 | 0.981786 |
| gene-AT1C  | 1.431325 | 1.172948 | 0.839379 | 0.105794 | 0.499846 | 0.275432 | 9.597548 | 9.779526 |
| gene-AT5C  | 170.5966 | 160.7164 | 169.9863 | 130.6171 | 131.85   | 135.0538 | 264.9301 | 277.1505 |
| gene-AT3C  | 6.543463 | 5.847549 | 6.716856 | 6.884376 | 6.677404 | 6.224662 | 10.57109 | 11.69648 |
| gene-AT2C  | 11.46452 | 10.90352 | 12.15122 | 24.95481 | 24.19118 | 23.39581 | 10.24659 | 10.60508 |
| gene-AT2C  | 1.274073 | 0.963625 | 0.792395 | 1.042328 | 0.898628 | 0.846277 | 0.567087 | 0.681993 |
| gene-AT4C  | 4.889145 | 6.096083 | 5.699979 | 7.146692 | 5.159885 | 4.509264 | 8.147695 | 5.13659  |
| gene-AT4C  | 6.904286 | 5.769495 | 7.170028 | 7.238068 | 7.02063  | 6.139807 | 5.116561 | 5.766758 |
| gene-AT2C  | 44.64093 | 50.22667 | 50.06389 | 279.4806 | 297.1633 | 281.4853 | 43.22291 | 36.83158 |
| gene-AT2C  | 182.5063 | 198.0503 | 175.7417 | 170.1934 | 184.1602 | 194.5553 | 75.0035  | 71.42329 |
| gene-AT4C  | 0.247878 | 0.606581 | 0.405518 | 1.562094 | 1.937453 | 1.913971 | 0.900093 | 0.527156 |
| gene-AT1C  | 20.99654 | 20.08626 | 20.66196 | 16.84051 | 16.44142 | 15.87308 | 21.76429 | 20.12874 |
| gene-AT2C  | 10.1112  | 9.5585   | 10.65917 | 6.364357 | 8.336267 | 5.265142 | 10.88226 | 11.77112 |
| gene-AT3C  | 42.03858 | 41.07583 | 40.51625 | 29.57118 | 29.90843 | 30.20334 | 41.38344 | 44.62485 |
| gene-AT2C  | 1.322618 | 2.334841 | 1.329184 | 1.187412 | 1.007217 | 0.87282  | 3.573066 | 1.623273 |
| gene-AT2C  | 36.04059 | 37.0642  | 39.7616  | 18.38194 | 18.64893 | 18.15791 | 51.45122 | 53.16213 |
| Arabidopsi | 1.070431 | 1.277958 | 1.661802 | 0.610203 | 0.255711 | 0.150122 | 0.466911 | 0.766566 |
| gene-AT1C  | 24.78445 | 23.85922 | 25.92085 | 14.22916 | 13.26063 | 13.02491 | 22.73284 | 23.31398 |
| gene-AT2C  | 79.99188 | 76.28422 | 79.51254 | 42.34337 | 40.8957  | 39.27586 | 101.5396 | 104.4481 |
| gene-AT5C  | 0.374202 | 0.598677 | 0.308012 | 0.755052 | 1.094658 | 0.549964 | 0.285026 | 0.070531 |
| gene-AT5C  | 3.913035 | 4.018239 | 4.070534 | 6.504688 | 5.643731 | 5.042755 | 2.547336 | 1.222277 |
| gene-AT3C  | 0.255817 | 0.109566 | 0.39714  | 0.122946 | 0.308294 | 0.325758 | 0.41923  | 0.440202 |
| gene-AT1C  | 61.68913 | 64.89989 | 62.10848 | 35.42751 | 34.43147 | 32.40767 | 93.70798 | 100.5211 |
| gene-AT5C  | 1.319945 | 0.739411 | 1.05814  | 0.673028 | 0.841845 | 1.092407 | 0.660247 | 0.923318 |
| gene-AT4C  | 6.877181 | 6.742775 | 6.458452 | 5.914513 | 6.019094 | 6.941195 | 5.586118 | 7.1086   |
| gene-AT2C  | 145.5519 | 150.1443 | 145.2616 | 135.8114 | 132.3156 | 127.9698 | 208.0019 | 194.3944 |
| gene-AT3C  | 34.21545 | 37.21427 | 30.34284 | 16.88271 | 22.69832 | 17.33266 | 9.786469 | 11.80004 |
| gene-AT3C  | 20.35149 | 20.28865 | 18.78491 | 31.12717 | 28.95281 | 27.68957 | 15.90297 | 16.93904 |
| gene-AT1C  | 2.498081 | 2.180462 | 2.189393 | 0.677577 | 0.290382 | 0.851126 | 2.249225 | 2.719604 |
| gene-AT1C  | 1.928455 | 2.864185 | 2.553166 | 5.26391  | 4.605326 | 5.954379 | 1.987195 | 2.721215 |

|           |          |          |          |          |          |          |          |          |
|-----------|----------|----------|----------|----------|----------|----------|----------|----------|
| gene-AT3C | 3.649182 | 3.348654 | 3.342525 | 3.916443 | 3.657743 | 3.078248 | 0.64507  | 0.611759 |
| gene-AT2C | 4.089846 | 5.028845 | 3.807205 | 9.571067 | 11.57579 | 8.041861 | 6.146898 | 5.774523 |
| gene-AT4C | 46.65781 | 45.13899 | 49.11979 | 32.75289 | 32.93572 | 33.91128 | 16.11455 | 15.20453 |
| gene-AT4C | 4.89408  | 4.001565 | 4.210514 | 5.25122  | 5.936046 | 5.844452 | 4.94489  | 5.975199 |
| gene-AT5C | 3.861368 | 4.414196 | 3.598775 | 5.250677 | 6.556399 | 6.094926 | 1.127239 | 1.509248 |
| gene-AT1C | 0.621703 | 0.69606  | 0.63239  | 0.703775 | 0.553758 | 1.089562 | 2.504808 | 1.677688 |
| gene-AT5C | 60.9847  | 57.43341 | 60.7899  | 41.24209 | 40.25198 | 40.71568 | 43.74252 | 44.1395  |
| gene-AT4C | 22.28758 | 21.02334 | 21.88934 | 8.13296  | 9.451638 | 9.456813 | 6.892808 | 7.249307 |
| gene-AT3C | 8.814539 | 9.51883  | 8.33136  | 18.64365 | 19.11474 | 19.5502  | 18.37589 | 18.81335 |
| gene-AT5C | 0.65775  | 1.263935 | 1.548947 | 0.799028 | 0.904923 | 1.176325 | 0.930755 | 1.615317 |
| gene-AT2C | 1741.031 | 1796.746 | 1735.514 | 1543.882 | 1552.341 | 1592.086 | 1746.024 | 1717.192 |
| gene-AT3C | 92.05427 | 91.24666 | 94.37505 | 79.51708 | 80.77403 | 76.49854 | 132.6256 | 138.17   |
| gene-AT1C | 14.35905 | 15.33577 | 14.60839 | 24.67889 | 25.08232 | 23.66139 | 45.36236 | 44.24977 |
| gene-AT1C | 15.24516 | 14.97453 | 13.38451 | 8.233206 | 10.31861 | 8.581154 | 3.740746 | 2.245258 |
| gene-AT3C | 22.54331 | 19.91634 | 21.18958 | 11.86801 | 12.37291 | 11.97894 | 2.487776 | 4.179832 |
| gene-AT1C | 10.49833 | 9.594095 | 11.52464 | 18.76767 | 19.32639 | 18.92594 | 4.386862 | 4.385719 |
| gene-AT5C | 35.48057 | 34.04009 | 38.57901 | 28.03842 | 28.1785  | 27.13434 | 47.77531 | 43.74342 |
| gene-AT4C | 28.99287 | 28.43476 | 29.71072 | 33.77167 | 32.71348 | 34.37574 | 38.79654 | 41.16423 |
| gene-AT2C | 0.886837 | 1.146955 | 1.163622 | 2.307081 | 2.134072 | 2.080808 | 2.60088  | 4.405701 |
| gene-AT1C | 30.5752  | 29.36276 | 30.31884 | 17.02301 | 17.58893 | 16.93056 | 17.11283 | 18.74924 |
| gene-AT1C | 1708.375 | 1655.44  | 1790.959 | 2355.161 | 2249.961 | 2344.035 | 522.2671 | 480.2573 |
| gene-AT3C | 72.55261 | 77.13661 | 68.56088 | 49.04953 | 55.96697 | 49.80664 | 142.8441 | 149.1759 |
| gene-AT5C | 3.096078 | 2.673353 | 2.379101 | 1.646503 | 1.214839 | 1.503905 | 3.078706 | 5.391664 |
| gene-AT2C | 6.378591 | 5.511118 | 4.594407 | 3.61965  | 3.767102 | 3.087821 | 6.478689 | 8.96139  |
| gene-AT4C | 2.372578 | 2.340459 | 2.194099 | 4.035202 | 4.047372 | 3.273524 | 3.12546  | 3.24123  |
| gene-AT4C | 9.013687 | 6.502201 | 7.320722 | 9.466257 | 7.499127 | 8.509099 | 15.48451 | 17.38621 |
| gene-AT5C | 3.56996  | 3.008397 | 3.397278 | 7.608951 | 6.495772 | 6.318844 | 5.263871 | 4.221781 |
| gene-AT3C | 3.689445 | 3.962191 | 4.4084   | 5.109695 | 7.720435 | 5.799913 | 3.039963 | 1.753917 |
| gene-AT3C | 0.9852   | 0.853181 | 0.846219 | 0.961978 | 1.224413 | 1.1015   | 0.681765 | 0.863231 |
| gene-AT3C | 1.795056 | 1.413746 | 0.936266 | 1.062427 | 1.386207 | 1.030677 | 0.745369 | 0.519411 |
| gene-AT2C | 13.98667 | 14.15475 | 13.90511 | 9.820485 | 10.70583 | 10.40016 | 19.2203  | 17.91665 |
| gene-AT3C | 17.68953 | 17.8896  | 16.83371 | 23.1896  | 21.85098 | 20.8041  | 12.7172  | 15.10357 |
| gene-AT5C | 8.264928 | 7.684693 | 9.216098 | 9.921406 | 9.487988 | 9.469333 | 16.30737 | 17.72456 |
| gene-AT2C | 23.675   | 21.86321 | 21.44396 | 19.93759 | 20.78706 | 22.91297 | 9.725981 | 11.82539 |
| gene-AT5C | 112.3391 | 107.1336 | 115.6786 | 88.68465 | 83.57822 | 76.7733  | 197.4976 | 198.2001 |
| gene-AT4C | 2.874291 | 2.889634 | 2.723912 | 0.850228 | 1.20379  | 1.088289 | 2.403234 | 2.083329 |
| gene-AT1C | 8.587084 | 8.313268 | 7.492877 | 4.028694 | 3.606972 | 3.583715 | 13.23838 | 11.83658 |
| gene-AT4C | 0.691307 | 0.675869 | 0.664887 | 0.306961 | 0.493495 | 0.656803 | 0.067046 | 0.058606 |
| gene-AT1C | 0.351481 | 0.266508 | 0.162438 | 1.175498 | 1.053031 | 1.017723 | 0.339078 | 0.199877 |
| gene-AT5C | 283.8364 | 271.6129 | 289.6059 | 216.6493 | 212.4137 | 214.2353 | 263.3639 | 277.0673 |
| gene-AT1C | 35.46906 | 34.83202 | 35.69149 | 63.42662 | 64.3041  | 62.476   | 16.14629 | 16.85479 |
| gene-AT5C | 3.727717 | 3.988154 | 3.125889 | 3.437063 | 2.771865 | 4.849306 | 8.961987 | 7.621915 |
| gene-AT3C | 1.610973 | 1.869933 | 1.76021  | 8.48892  | 7.030068 | 8.237112 | 0.703443 | 0.758198 |
| gene-AT2C | 1.626149 | 2.708024 | 1.552208 | 4.497018 | 4.350089 | 3.967494 | 1.933057 | 1.877773 |
| gene-AT1C | 2.914891 | 3.07789  | 3.31394  | 1.80104  | 1.728139 | 2.084551 | 3.141219 | 2.917693 |
| gene-AT4C | 0.583852 | 1.37085  | 0.80315  | 0.755716 | 0.620797 | 1.245946 | 1.312067 | 1.771692 |
| gene-AT1C | 2.157492 | 1.709128 | 1.798931 | 3.38618  | 3.962874 | 3.501994 | 1.697078 | 1.467033 |
| gene-AT3C | 25.45279 | 25.08251 | 24.40722 | 16.11947 | 15.40331 | 15.73562 | 32.2273  | 33.68823 |
| gene-AT2C | 268.2066 | 266.145  | 263.684  | 195.1216 | 191.5056 | 190.8275 | 438.7049 | 442.5765 |
| gene-AT1C | 1.819621 | 2.222148 | 2.457126 | 6.025114 | 6.06117  | 6.088255 | 2.294275 | 1.547761 |
| gene-AT2C | 3.569342 | 4.154599 | 3.676522 | 4.963309 | 5.036194 | 4.822345 | 7.714413 | 7.743948 |

|           |          |          |          |          |          |          |          |          |
|-----------|----------|----------|----------|----------|----------|----------|----------|----------|
| gene-AT2C | 0.54509  | 0.453747 | 0.644168 | 1.367977 | 1.056125 | 0.830824 | 1.55084  | 2.134975 |
| gene-AT2C | 0.911954 | 1.670229 | 1.018672 | 1.85916  | 1.811507 | 1.925213 | 0.136677 | 0        |
| gene-AT4C | 13.97781 | 13.10245 | 12.08009 | 36.14842 | 38.45967 | 41.65687 | 14.03225 | 16.7962  |
| gene-AT4C | 119.4046 | 118.1538 | 119.4019 | 272.5267 | 271.3534 | 271.6855 | 92.78348 | 94.49541 |
| gene-AT5C | 4.210082 | 4.154506 | 4.242968 | 7.638313 | 7.000106 | 7.241684 | 3.539982 | 3.415562 |
| gene-AT3C | 29.03271 | 28.06245 | 27.86396 | 8.842176 | 9.028242 | 9.624906 | 94.18308 | 99.12151 |
| gene-AT4C | 30.92615 | 36.53993 | 32.47519 | 11.41853 | 11.99925 | 13.92491 | 3.710928 | 3.23839  |
| gene-AT4C | 2.650553 | 3.265106 | 3.534184 | 2.663963 | 3.665701 | 2.671453 | 1.410643 | 1.58732  |
| gene-AT3C | 22.21579 | 23.20416 | 25.46732 | 50.29205 | 48.65198 | 49.31979 | 18.22464 | 18.68553 |
| gene-AT4C | 193.6175 | 186.3951 | 201.9    | 18.6655  | 19.0109  | 18.89674 | 195.6312 | 207.2435 |
| gene-AT5C | 7.157834 | 8.012653 | 7.991581 | 5.191501 | 5.419963 | 5.089493 | 2.442763 | 1.979676 |
| gene-AT3C | 0.678421 | 0.569005 | 0.781861 | 1.585047 | 1.361426 | 1.805012 | 0.696879 | 0.692252 |
| gene-AT3C | 637.3097 | 627.9159 | 656.2803 | 598.493  | 594.9288 | 582.3721 | 250.2828 | 265.2458 |
| gene-AT2C | 9.787267 | 9.400795 | 10.23294 | 2.633323 | 2.118471 | 2.373851 | 7.771665 | 7.195758 |
| gene-AT4C | 20.09082 | 20.88412 | 23.24155 | 10.406   | 9.586701 | 9.341741 | 11.40154 | 12.08768 |
| gene-AT1C | 6.515284 | 5.63714  | 5.134904 | 8.61105  | 9.171643 | 6.587646 | 5.870623 | 5.470866 |
| gene-AT5C | 0.640476 | 0.479049 | 0.580732 | 1.821735 | 1.963356 | 1.644472 | 0.270747 | 0.407045 |
| gene-AT1C | 6.114353 | 6.676519 | 6.50622  | 3.96086  | 4.093614 | 3.969949 | 11.4947  | 11.8799  |
| gene-AT1C | 7.884886 | 6.794307 | 8.904135 | 10.62682 | 12.29664 | 12.55032 | 3.810763 | 4.785414 |
| gene-AT1C | 0.334421 | 0.438061 | 0.528425 | 0.109885 | 0.164013 | 0.126266 | 0.687256 | 0.827766 |
| gene-AT1C | 0.650511 | 0.671019 | 0.771119 | 1.524627 | 1.892935 | 1.494429 | 0.632666 | 0.655854 |
| gene-AT5C | 10.04711 | 9.759333 | 9.461645 | 6.513842 | 6.174986 | 6.515477 | 5.977742 | 5.847777 |
| gene-AT1C | 4.593847 | 3.783793 | 4.074689 | 3.612274 | 3.247559 | 3.839408 | 0.862875 | 1.131543 |
| gene-AT3C | 3.199516 | 2.247939 | 2.568675 | 1.938331 | 2.079102 | 1.993812 | 4.188002 | 5.213491 |
| gene-AT3C | 19.42501 | 17.70563 | 18.45645 | 13.58587 | 13.30386 | 13.99408 | 35.45931 | 34.44395 |
| gene-AT4C | 45.31795 | 47.40079 | 44.52862 | 22.09441 | 25.86262 | 20.48458 | 19.77104 | 18.86249 |
| gene-AT3C | 10.37373 | 9.238313 | 9.415321 | 4.494848 | 5.918605 | 4.791267 | 3.574218 | 3.919325 |
| gene-AT1C | 1.317007 | 2.033238 | 1.678816 | 2.107111 | 2.277781 | 1.413389 | 2.321926 | 1.730464 |
| gene-AT5C | 34.00441 | 32.31175 | 34.44088 | 28.31793 | 28.73325 | 27.29377 | 46.66901 | 49.95984 |
| gene-AT3C | 3.763928 | 3.00764  | 3.320958 | 3.211258 | 3.133775 | 3.929125 | 5.101926 | 3.890702 |
| gene-AT5C | 24.84233 | 23.27691 | 25.16038 | 23.73017 | 21.63043 | 21.73614 | 32.13144 | 35.13202 |
| gene-AT5C | 3.376474 | 3.269589 | 2.514378 | 4.799905 | 5.916443 | 3.741822 | 2.18659  | 1.583361 |
| gene-AT5C | 4.617119 | 3.866936 | 4.704453 | 6.946596 | 8.400062 | 7.955146 | 3.182784 | 2.428298 |
| gene-AT1C | 5.806185 | 6.629871 | 7.33426  | 6.736361 | 7.409685 | 7.369203 | 7.164382 | 8.003242 |
| gene-AT2C | 2.478451 | 3.524376 | 3.606319 | 1.600284 | 1.966575 | 2.147736 | 2.953648 | 3.388746 |
| gene-AT4C | 3.759294 | 3.933153 | 4.55502  | 4.941621 | 4.996478 | 5.498816 | 2.405811 | 2.249692 |
| gene-AT1C | 98.82684 | 101.5835 | 99.96313 | 122.6988 | 118.6759 | 118.071  | 33.92987 | 30.29972 |
| gene-AT1C | 39.54057 | 40.58477 | 37.98969 | 32.07856 | 35.80438 | 32.88466 | 13.66016 | 15.96977 |
| gene-AT1C | 13.7045  | 11.51373 | 12.70534 | 2.425919 | 2.416152 | 2.300276 | 31.79607 | 31.73654 |
| gene-AT1C | 23.90352 | 26.57629 | 21.39598 | 17.65468 | 17.32463 | 15.50927 | 36.54987 | 39.26064 |
| gene-AT5C | 23.13068 | 21.87591 | 22.74678 | 18.10597 | 16.08336 | 17.19528 | 36.72909 | 37.42539 |
| gene-AT1C | 15.30606 | 15.95768 | 16.30457 | 11.80619 | 13.49376 | 11.34081 | 23.4037  | 25.10581 |
| gene-AT1C | 2.347412 | 2.509834 | 2.93019  | 1.076343 | 0.913103 | 0.805351 | 0.320428 | 0.338241 |
| gene-AT1C | 13.40665 | 13.29937 | 13.9398  | 12.34078 | 10.42078 | 10.72081 | 5.149363 | 4.686966 |
| gene-AT5C | 11.63431 | 10.80229 | 10.03021 | 15.04409 | 15.13772 | 15.17973 | 7.031756 | 6.154869 |
| gene-AT1C | 89.47784 | 92.99606 | 90.51981 | 56.20054 | 51.26219 | 52.86053 | 163.7877 | 165.8892 |
| gene-AT3C | 0.6849   | 0.729672 | 0.35181  | 0.788073 | 1.15218  | 0.757193 | 0.138662 | 0        |
| gene-AT2C | 0.781956 | 0.884815 | 0.975925 | 2.206762 | 1.359205 | 1.916506 | 0.652435 | 0.349453 |
| gene-AT3C | 0.869222 | 0.688455 | 0.761275 | 0.386164 | 0.341768 | 0.264656 | 1.214881 | 0.930816 |
| gene-AT5C | 2.165814 | 1.323913 | 1.576628 | 2.393583 | 2.560191 | 3.411346 | 1.082512 | 1.026722 |
| gene-AT1C | 0.74809  | 0.839308 | 1.052343 | 2.046391 | 2.093479 | 1.715435 | 1.224055 | 1.765335 |

|            |          |          |          |          |          |          |          |          |
|------------|----------|----------|----------|----------|----------|----------|----------|----------|
| gene-AT5C  | 79.93438 | 82.21027 | 82.53578 | 69.09438 | 75.71825 | 66.50558 | 29.59507 | 28.47724 |
| gene-AT2C  | 22.85569 | 25.19213 | 24.4846  | 36.75166 | 37.60081 | 35.81408 | 18.03259 | 19.29669 |
| gene-AT5C  | 0.200231 | 0.174038 | 0.176352 | 0.297481 | 0.24646  | 0.210024 | 0.25775  | 0.408843 |
| gene-AT1C  | 45.52158 | 46.46908 | 40.6795  | 20.10629 | 19.10537 | 19.14261 | 36.02018 | 40.70607 |
| gene-AT4C  | 0.898582 | 0.361621 | 1.341133 | 1.522663 | 1.0232   | 1.991347 | 0.489631 | 0.762191 |
| gene-AT2C  | 4.473716 | 4.954163 | 4.778809 | 4.55626  | 5.546885 | 4.559198 | 1.965993 | 2.665791 |
| gene-AT4C  | 8.001978 | 9.127451 | 8.815021 | 54.4853  | 50.24108 | 50.53116 | 8.723145 | 7.793527 |
| gene-AT3C  | 4.065135 | 4.381385 | 5.091048 | 0.285595 | 0.276668 | 0.874083 | 0.368562 | 0.395298 |
| gene-AT2C  | 5.350131 | 6.047873 | 5.498106 | 4.628581 | 4.848467 | 5.910627 | 1.004584 | 1.222828 |
| gene-AT1C  | 358.3568 | 393.625  | 357.6869 | 540.2958 | 556.443  | 572.5262 | 299.7225 | 240.9793 |
| gene-AT2C  | 10.12605 | 9.818976 | 11.02255 | 4.318964 | 5.199381 | 4.454817 | 11.4191  | 13.93733 |
| gene-AT2C  | 35.43996 | 37.4252  | 36.86793 | 44.383   | 44.88526 | 42.83851 | 46.09662 | 44.17869 |
| gene-AT1C  | 12.67989 | 11.39087 | 13.25922 | 15.96974 | 15.97894 | 14.84744 | 29.5088  | 29.97622 |
| gene-AT1C  | 5.643484 | 5.690813 | 5.88047  | 6.447768 | 6.589481 | 9.337725 | 13.31269 | 10.66365 |
| gene-AT5C  | 2.001337 | 2.30083  | 2.445322 | 1.549743 | 1.665825 | 1.373506 | 2.764971 | 3.393355 |
| gene-AT5C  | 15.31388 | 15.09924 | 13.96594 | 23.04691 | 23.81711 | 21.51065 | 15.50478 | 18.31037 |
| gene-AT2C  | 1.045272 | 1.486062 | 1.239062 | 2.304502 | 2.892967 | 2.319486 | 2.576301 | 3.125543 |
| gene-AT1C  | 1.43888  | 1.026089 | 1.250365 | 2.375507 | 1.604601 | 2.888041 | 0.623238 | 0.757596 |
| gene-AT2C  | 15.32283 | 15.59763 | 16.32885 | 12.94678 | 12.52839 | 10.82287 | 11.94841 | 14.19278 |
| gene-AT5C  | 7.903063 | 6.923857 | 6.929942 | 4.377137 | 4.677403 | 5.162036 | 9.90172  | 12.66838 |
| gene-AT5C  | 42.88155 | 47.65804 | 45.53902 | 34.00669 | 36.11101 | 34.95968 | 19.42988 | 20.57886 |
| gene-AT1C  | 31.1517  | 29.32497 | 34.87523 | 29.63276 | 31.36124 | 29.11337 | 34.69093 | 34.67368 |
| gene-AT4C  | 5.88882  | 5.946236 | 5.648625 | 3.130442 | 2.772291 | 3.380738 | 11.48868 | 12.1008  |
| gene-AT1C  | 15.92297 | 13.69858 | 15.51718 | 13.99956 | 12.99071 | 13.54924 | 24.751   | 26.46116 |
| gene-AT2C  | 5.973049 | 5.715745 | 5.048841 | 7.97973  | 7.347934 | 7.138821 | 3.897765 | 4.310173 |
| gene-AT2C  | 1.455665 | 1.148099 | 1.302925 | 1.38426  | 0.985653 | 0.496289 | 0.700114 | 0.655641 |
| Arabidopsi | 1.124017 | 1.194123 | 1.230899 | 1.777291 | 1.604918 | 1.455693 | 0.064784 | 0        |
| gene-AT2C  | 0.470701 | 0.314117 | 0.353777 | 3.749483 | 3.315152 | 3.576946 | 1.005994 | 1.460446 |
| gene-AT2C  | 0.097498 | 0.218691 | 0.211292 | 0.474736 | 0.280594 | 0.487343 | 0.020856 | 0.055184 |
| gene-AT2C  | 72.3613  | 69.7381  | 67.59205 | 39.08568 | 37.32062 | 41.53932 | 61.66758 | 64.96773 |
| gene-AT3C  | 0.051403 | 0.06954  | 0        | 0        | 0.103042 | 0.09519  | 0.042731 | 0        |
| gene-AT4C  | 6.86641  | 6.481107 | 6.528075 | 6.815926 | 6.768204 | 7.143856 | 7.29612  | 8.924787 |
| gene-AT2C  | 1.471407 | 0.873779 | 1.031253 | 1.447795 | 1.714741 | 1.380118 | 0.916695 | 1.341593 |
| gene-AT1C  | 12.4069  | 8.537546 | 9.203225 | 5.181814 | 5.836407 | 6.38173  | 10.75622 | 12.91623 |
| gene-AT3C  | 31.77732 | 31.24996 | 32.91935 | 102.251  | 102.1806 | 104.2088 | 18.90556 | 19.58462 |
| gene-AT5C  | 1.580999 | 0.95237  | 1.646422 | 2.518579 | 2.757373 | 2.232296 | 0.995643 | 1.534687 |
| gene-AT3C  | 29.10607 | 29.11406 | 31.40337 | 36.91542 | 36.09074 | 35.23373 | 12.9151  | 17.77748 |
| gene-AT2C  | 11.72319 | 10.10072 | 11.13087 | 4.514462 | 5.564192 | 5.088493 | 3.335153 | 2.577309 |
| gene-AT4C  | 0.65422  | 0.536804 | 0.556625 | 0.523534 | 0.476778 | 0.663208 | 0.623603 | 0.882917 |
| gene-AT1C  | 5.301738 | 6.987804 | 6.266261 | 7.792047 | 7.733212 | 6.993854 | 7.190238 | 8.174794 |
| gene-AT2C  | 222.6386 | 221.6628 | 231.0597 | 101.3909 | 99.70078 | 99.83223 | 201.0777 | 203.1216 |
| gene-AT4C  | 404.55   | 392.4699 | 401.3465 | 298.2866 | 297.6946 | 290.1714 | 571.6555 | 595.8674 |
| gene-AT1C  | 6.259086 | 6.379461 | 6.179473 | 5.444473 | 5.561082 | 6.049303 | 9.462082 | 10.79224 |
| gene-AT4C  | 18.20007 | 18.25619 | 19.78566 | 18.26974 | 21.15867 | 20.92214 | 30.83387 | 32.37716 |
| gene-AT2C  | 33.95747 | 33.90485 | 32.64805 | 37.10693 | 37.26697 | 36.59562 | 13.28286 | 11.70982 |
| gene-AT3C  | 47.05849 | 48.34228 | 47.48591 | 35.21124 | 36.05451 | 33.57137 | 52.73182 | 57.64545 |
| gene-AT1C  | 46.12256 | 45.9443  | 46.18972 | 32.76297 | 32.84935 | 28.66254 | 75.44201 | 78.01987 |
| gene-AT3C  | 0.86247  | 0.814129 | 0.628197 | 0.490079 | 1.448199 | 0.841326 | 0.183549 | 0.465986 |
| gene-AT5C  | 1.289389 | 0.800672 | 0.783946 | 1.506689 | 2.353246 | 2.246964 | 1.839774 | 1.614028 |
| gene-AT3C  | 6.489695 | 6.919473 | 8.143437 | 6.140798 | 5.963202 | 5.954718 | 1.546609 | 1.133162 |
| gene-AT2C  | 19.99862 | 18.98091 | 17.64765 | 16.03541 | 16.89421 | 17.01494 | 22.47284 | 24.76511 |

|           |          |          |          |          |          |          |          |          |
|-----------|----------|----------|----------|----------|----------|----------|----------|----------|
| gene-AT1C | 0.426041 | 1.270745 | 0.622629 | 2.250838 | 1.694522 | 3.001847 | 0.631176 | 0.474719 |
| gene-AT3C | 201.9651 | 195.6313 | 201.2819 | 344.8495 | 347.8834 | 335.8287 | 123.1213 | 126.8932 |
| gene-AT3C | 0.854141 | 0.830446 | 0.995773 | 0.742254 | 0.969019 | 1.10734  | 3.051908 | 2.921661 |
| gene-AT5C | 1.582432 | 1.772549 | 1.863327 | 0.313595 | 0.277095 | 0.510515 | 1.452257 | 1.180713 |
| gene-AT2C | 2.061787 | 1.766535 | 2.021657 | 0.539795 | 0.69991  | 1.26462  | 0.17051  | 0.392043 |
| gene-AT1C | 5.27165  | 5.830579 | 6.014286 | 10.24386 | 8.464307 | 9.27562  | 5.230844 | 4.357168 |
| gene-AT5C | 13.86429 | 13.11654 | 13.7017  | 14.12284 | 14.75093 | 13.30392 | 18.7818  | 19.36794 |
| gene-AT3C | 4.287414 | 4.332629 | 4.135466 | 3.118459 | 3.067975 | 2.922755 | 4.404561 | 3.957878 |
| gene-AT3C | 1.325586 | 1.491921 | 1.814775 | 1.28712  | 1.941869 | 1.599897 | 1.813796 | 1.801524 |
| gene-AT3C | 3.679853 | 3.819153 | 3.550554 | 2.412091 | 2.296478 | 2.781919 | 2.310002 | 2.02984  |
| gene-AT5C | 1.254776 | 1.201037 | 0.99246  | 0.912708 | 1.000861 | 0.740977 | 1.727863 | 1.331286 |
| gene-AT3C | 46.32717 | 46.70897 | 46.28024 | 72.00295 | 68.36603 | 65.79466 | 8.478877 | 9.024091 |
| gene-AT5C | 7.631907 | 6.865178 | 8.522324 | 7.940087 | 7.040585 | 7.273963 | 3.016764 | 2.391573 |
| gene-AT5C | 2.400302 | 2.8455   | 2.640706 | 1.990314 | 1.410658 | 1.863833 | 3.325979 | 3.588456 |
| gene-AT5C | 234.4505 | 239.3262 | 237.2217 | 109.1286 | 110.927  | 114.9158 | 726.2631 | 764.1639 |
| gene-AT3C | 27.92114 | 27.00107 | 26.04657 | 29.98824 | 31.48519 | 31.96534 | 51.44808 | 52.59854 |
| gene-AT1C | 62.62757 | 59.606   | 61.31781 | 64.31784 | 62.35981 | 67.1773  | 104.6149 | 104.1313 |
| gene-AT5C | 3.221359 | 3.714839 | 3.808484 | 5.211878 | 4.382087 | 3.956239 | 6.428168 | 6.81403  |
| gene-AT5C | 0.600025 | 0.210883 | 0.172389 | 2.243826 | 2.399824 | 2.164521 | 0.652788 | 0.774279 |
| gene-AT3C | 9.258503 | 9.131083 | 9.908436 | 23.83489 | 26.85391 | 24.46496 | 3.002926 | 2.389232 |
| gene-AT1C | 1.695179 | 2.233809 | 2.608629 | 1.0437   | 0.622792 | 1.223499 | 1.315623 | 0.614363 |
| gene-AT3C | 3.627628 | 3.124822 | 3.957974 | 3.615231 | 4.101062 | 3.835334 | 2.026004 | 1.711519 |
| gene-AT1C | 0.870508 | 0.538769 | 0.487146 | 0.880223 | 1.440136 | 1.208072 | 0.417421 | 1.082543 |
| gene-AT1C | 5.588198 | 6.85815  | 5.732237 | 6.416937 | 7.376655 | 7.311456 | 3.716506 | 3.845801 |
| gene-AT3C | 0.09021  | 0.378397 | 0.472051 | 1.182063 | 1.445457 | 1.326043 | 0.397954 | 0.073896 |
| gene-AT4C | 0.493984 | 0.37214  | 0.534908 | 0.607329 | 0.693371 | 0.931438 | 0.238644 | 0.085291 |
| gene-AT3C | 4.317702 | 4.192747 | 5.97134  | 5.712918 | 7.517611 | 5.380073 | 1.365904 | 1.368543 |
| gene-AT1C | 43.05984 | 40.53726 | 39.42009 | 36.29372 | 33.91545 | 34.78299 | 14.93639 | 18.08884 |
| gene-AT4C | 1.553604 | 1.572459 | 1.162308 | 2.419349 | 2.771709 | 2.166091 | 0.599625 | 0.522394 |
| gene-AT4C | 0.158733 | 0.143601 | 0.272924 | 1.198617 | 0.908913 | 1.13318  | 0        | 0        |
| gene-AT1C | 2.320565 | 3.14065  | 2.904574 | 2.761219 | 2.33698  | 1.857193 | 1.154082 | 0.979721 |
| gene-AT1C | 28.23513 | 30.20307 | 26.96918 | 14.76242 | 13.63579 | 13.80177 | 19.34456 | 19.80716 |
| gene-AT5C | 10.55168 | 9.751666 | 9.722032 | 10.58929 | 9.992885 | 9.796217 | 8.803802 | 9.089597 |
| gene-AT5C | 1.336874 | 1.911237 | 2.157183 | 2.822476 | 1.847304 | 2.371328 | 0.922983 | 0.857368 |
| gene-AT2C | 1.484355 | 0.788247 | 1.617266 | 0.217048 | 0.255556 | 0.363846 | 2.169082 | 2.157118 |
| gene-AT5C | 2.289767 | 2.222684 | 1.503351 | 3.238518 | 2.858121 | 2.538211 | 8.55895  | 10.87333 |
| gene-AT2C | 68.27828 | 66.9272  | 61.10878 | 94.22798 | 98.14699 | 94.64295 | 35.06257 | 37.66857 |
| gene-AT1C | 7.107034 | 5.846701 | 6.858602 | 20.13873 | 18.75681 | 21.43789 | 6.469567 | 5.899537 |
| gene-AT2C | 2.463029 | 2.039929 | 1.942987 | 2.261301 | 1.274192 | 2.022261 | 1.341237 | 1.189286 |
| gene-AT5C | 4.445245 | 4.289564 | 4.25417  | 8.779241 | 9.667919 | 9.663893 | 9.402726 | 8.616967 |
| gene-AT5C | 132.2791 | 124.9728 | 130.8419 | 169.2772 | 173.1539 | 173.558  | 48.3734  | 51.28244 |
| gene-AT5C | 8.624762 | 6.372782 | 6.515352 | 3.151253 | 2.478562 | 2.283002 | 1.258106 | 1.287522 |
| gene-AT2C | 40.62466 | 37.67168 | 38.412   | 14.30123 | 15.37541 | 14.4118  | 20.44955 | 21.50138 |
| gene-AT4C | 4.509716 | 5.133186 | 4.603925 | 1.84653  | 1.603219 | 1.508962 | 6.920926 | 7.602797 |
| gene-AT2C | 0.719839 | 0.925924 | 0.823959 | 0.801575 | 0.789936 | 1.161519 | 1.264402 | 1.050214 |
| gene-AT5C | 0.135021 | 0.274287 | 0.180626 | 0.528235 | 0.504831 | 0.693011 | 0.027915 | 0        |
| gene-AT5C | 0.448453 | 0.470313 | 0.789572 | 0.722213 | 0.567698 | 0.716217 | 1.071439 | 1.035569 |
| gene-AT5C | 11.30667 | 9.973621 | 11.46556 | 10.37546 | 10.93449 | 9.984862 | 6.2323   | 5.817809 |
| gene-AT5C | 3.830587 | 3.956772 | 4.108245 | 1.666948 | 1.497057 | 1.02074  | 5.683948 | 7.200684 |
| gene-AT5C | 0.227981 | 0.166168 | 0.156597 | 0.603063 | 0.740901 | 0.715285 | 0.284544 | 0.421734 |
| gene-AT2C | 5.807129 | 6.377737 | 6.534336 | 5.907073 | 4.5315   | 6.476176 | 15.70052 | 15.34137 |

|           |          |          |          |          |          |          |          |          |
|-----------|----------|----------|----------|----------|----------|----------|----------|----------|
| gene-AT5C | 3.507347 | 2.977941 | 2.910856 | 5.676075 | 5.162776 | 6.778988 | 3.601216 | 2.127451 |
| gene-AT1C | 26.81657 | 25.16427 | 26.81714 | 63.20156 | 59.17347 | 62.21187 | 23.97167 | 27.0107  |
| gene-AT3C | 0.942679 | 1.419639 | 1.006215 | 1.912996 | 1.190534 | 1.844976 | 0.402201 | 0.329348 |
| gene-AT4C | 11.0196  | 11.40311 | 12.34126 | 7.088415 | 8.170978 | 7.04844  | 10.27679 | 12.09549 |
| gene-AT4C | 8.803465 | 8.170245 | 7.081177 | 6.646562 | 7.607826 | 6.708683 | 3.752255 | 3.788685 |
| gene-AT3C | 0.906664 | 1.215348 | 1.187831 | 0        | 0        | 0.048911 | 7.903612 | 8.667854 |
| gene-AT5C | 25.11678 | 26.94433 | 24.95747 | 15.28859 | 14.97063 | 13.65897 | 34.8302  | 34.70265 |
| gene-AT5C | 11.71538 | 12.28604 | 12.48768 | 11.03788 | 10.05963 | 10.81882 | 23.69893 | 24.17681 |
| gene-AT4C | 14.9687  | 13.81595 | 14.98314 | 26.9274  | 28.665   | 27.77749 | 10.50351 | 11.24102 |
| gene-AT1C | 26.99084 | 26.51756 | 26.97532 | 30.89706 | 30.51643 | 30.059   | 18.28328 | 18.8165  |
| gene-AT1C | 2.375384 | 1.61555  | 2.54079  | 0.826258 | 0.820512 | 1.476948 | 0.42749  | 0.703317 |
| gene-AT4C | 11.82172 | 12.6221  | 12.28939 | 7.157144 | 7.547859 | 8.243401 | 19.96162 | 22.40785 |
| gene-AT3C | 667.6144 | 648.6557 | 669.5172 | 274.408  | 280.4353 | 271.2797 | 714.7221 | 707.4754 |
| gene-AT2C | 87.196   | 105.9142 | 88.6949  | 92.17208 | 96.89494 | 95.98518 | 49.05967 | 41.66852 |
| gene-AT4C | 1.417907 | 1.525928 | 2.152729 | 2.486014 | 1.714944 | 2.505139 | 1.576774 | 1.046494 |
| gene-AT2C | 8.25043  | 7.83077  | 7.986623 | 7.670558 | 7.265377 | 5.064899 | 14.13754 | 14.6354  |
| gene-AT4C | 38.55715 | 37.30263 | 38.89075 | 33.51881 | 31.86142 | 31.72418 | 55.12276 | 53.19532 |
| gene-AT1C | 2.300479 | 1.684652 | 1.367574 | 2.319765 | 2.300278 | 2.666466 | 0.81705  | 0.597818 |
| gene-AT1C | 2.255656 | 1.815636 | 1.818243 | 0.841555 | 1.251393 | 1.00483  | 0.311101 | 0.278105 |
| gene-AT1C | 9.532071 | 12.18384 | 10.06118 | 7.648759 | 5.733465 | 5.960455 | 15.70131 | 17.34105 |
| gene-AT5C | 0.688194 | 0.370476 | 0.593298 | 0.596266 | 0.855734 | 0.366577 | 0.230753 | 0.183532 |
| gene-AT5C | 0.934632 | 1.042467 | 0.887905 | 1.517444 | 1.987975 | 2.133772 | 0.488883 | 0.283209 |
| gene-AT5C | 203.6749 | 197.947  | 208.0278 | 106.8233 | 110.448  | 102.5757 | 141.4677 | 143.7124 |
| gene-AT1C | 21.61422 | 22.22232 | 22.69809 | 34.55689 | 32.58539 | 32.00524 | 8.39352  | 7.38578  |
| gene-AT1C | 4.368687 | 3.729261 | 4.551953 | 10.81189 | 9.951633 | 11.16154 | 2.655665 | 2.280647 |
| gene-AT5C | 1.479449 | 1.41542  | 1.615932 | 1.399754 | 1.636384 | 1.5159   | 2.134007 | 1.787679 |
| gene-AT5C | 4.094422 | 3.687213 | 3.684291 | 7.36639  | 7.693239 | 8.201406 | 2.567314 | 3.017395 |
| gene-AT1C | 2.191603 | 2.383955 | 0.926064 | 3.87012  | 4.231483 | 4.049829 | 1.580557 | 0.734242 |
| gene-AT3C | 8.521039 | 8.579429 | 7.595389 | 0.502046 | 0.363249 | 0.624731 | 14.00329 | 15.05758 |
| gene-AT5C | 0.739974 | 1.063206 | 0.618231 | 1.642214 | 1.846475 | 1.676946 | 0.271774 | 0.277469 |
| gene-AT4C | 3.158181 | 3.732766 | 3.405237 | 8.68099  | 8.249566 | 9.41369  | 1.764668 | 2.030291 |
| gene-AT2C | 9.237926 | 9.063621 | 11.23965 | 12.21703 | 11.60626 | 13.1993  | 4.056947 | 3.880131 |
| gene-AT5C | 5.006506 | 3.322541 | 3.682322 | 3.245556 | 3.483686 | 4.012105 | 2.084648 | 2.870065 |
| gene-AT1C | 2.103576 | 2.868163 | 2.507576 | 4.916951 | 2.986812 | 4.484005 | 6.234538 | 6.870727 |
| gene-AT1C | 2.810494 | 2.75217  | 2.312975 | 1.880761 | 2.355602 | 2.307717 | 5.94107  | 6.170197 |
| gene-AT3C | 0.574561 | 0.70183  | 0.652327 | 0.540506 | 0.371673 | 0.538858 | 0.02021  | 0.024419 |
| gene-AT3C | 3.742846 | 3.348953 | 4.11746  | 3.988274 | 4.284987 | 3.790668 | 4.257076 | 5.285288 |
| gene-AT4C | 31.73961 | 30.62847 | 29.99998 | 28.5372  | 27.88749 | 26.33824 | 13.47263 | 11.46071 |
| gene-AT1C | 89.35497 | 85.83954 | 85.16424 | 79.96592 | 78.37377 | 77.27839 | 54.93329 | 60.09681 |
| gene-AT1C | 197.8405 | 197.9084 | 204.9868 | 130.4198 | 129.945  | 134.2378 | 357.8385 | 367.7871 |
| gene-AT1C | 12.08847 | 11.23415 | 9.824581 | 5.08147  | 5.14565  | 6.846237 | 2.947427 | 5.153702 |
| gene-AT5C | 1.038805 | 0.842232 | 1.173714 | 3.677204 | 4.170582 | 3.936139 | 2.010604 | 1.002168 |
| gene-AT4C | 7.522727 | 7.192959 | 6.32632  | 2.189775 | 1.884781 | 2.843991 | 10.90635 | 15.94752 |
| gene-AT5C | 5.18267  | 5.153769 | 5.392628 | 3.002234 | 3.257563 | 2.545056 | 5.914288 | 5.075873 |
| gene-AT5C | 8.244013 | 9.339776 | 8.861425 | 7.837987 | 7.853069 | 8.78054  | 2.895037 | 2.985583 |
| gene-AT1C | 1.09317  | 0.849627 | 1.327656 | 1.518781 | 1.346588 | 1.743212 | 1.033282 | 1.038325 |
| gene-AT2C | 15.10503 | 15.55872 | 17.78689 | 12.79943 | 12.65688 | 12.85346 | 1.283389 | 1.591625 |
| gene-AT5C | 1.024486 | 0.88163  | 1.147978 | 3.190016 | 3.925797 | 2.833621 | 1.450189 | 2.030961 |
| gene-AT5C | 1.815625 | 1.869088 | 2.002417 | 7.448969 | 7.038636 | 8.536148 | 2.590712 | 3.228855 |
| gene-AT4C | 6.303944 | 7.061337 | 5.917376 | 7.157837 | 5.4205   | 6.091153 | 2.601558 | 2.482839 |
| gene-AT1C | 12.88792 | 12.89662 | 12.41235 | 9.658308 | 10.34502 | 8.045682 | 21.85254 | 25.91085 |

|            |          |          |          |          |          |          |          |          |
|------------|----------|----------|----------|----------|----------|----------|----------|----------|
| gene-AT4C  | 1.027723 | 1.105177 | 1.27883  | 1.132994 | 1.117006 | 1.233313 | 3.652568 | 3.73761  |
| Arabidopsi | 0.214223 | 0.351981 | 0.641568 | 1.984907 | 1.798426 | 1.062245 | 0.452226 | 0.11333  |
| gene-AT4C  | 4.11264  | 4.852933 | 3.093706 | 4.081336 | 4.233576 | 2.956215 | 2.783923 | 3.513102 |
| gene-AT1C  | 39.2084  | 43.34197 | 41.96008 | 37.2363  | 40.02182 | 38.1887  | 67.94115 | 67.34038 |
| gene-AT2C  | 50.85654 | 50.97516 | 50.16773 | 37.49506 | 37.77039 | 39.7685  | 82.78653 | 85.48973 |
| gene-AT4C  | 10.91601 | 11.94445 | 11.95386 | 8.353739 | 7.166702 | 6.905767 | 20.45687 | 19.27758 |
| gene-AT3C  | 27.04683 | 25.83291 | 30.95347 | 36.34932 | 36.10183 | 36.29736 | 18.07121 | 18.70761 |
| gene-AT3C  | 1.569322 | 1.409667 | 1.410849 | 3.473728 | 3.496471 | 3.03845  | 0.883384 | 1.007289 |
| gene-AT1C  | 3.554487 | 2.696741 | 3.793137 | 6.598201 | 8.442278 | 10.01934 | 5.053579 | 3.148426 |
| gene-AT1C  | 551.2853 | 533.0566 | 554.5506 | 421.2132 | 413.1115 | 416.8024 | 346.132  | 349.5502 |
| gene-AT2C  | 1.444203 | 1.375417 | 1.834818 | 1.888656 | 2.463394 | 2.633183 | 1.310528 | 1.570424 |
| gene-AT1C  | 30.78392 | 30.89296 | 29.43646 | 24.90785 | 21.23708 | 24.14723 | 35.4106  | 37.55214 |
| gene-AT1C  | 12.65629 | 9.654722 | 11.85923 | 9.176894 | 9.070683 | 8.491185 | 9.659956 | 9.555192 |
| gene-AT1C  | 3.047587 | 4.348609 | 4.698251 | 0.696593 | 0.60316  | 1.003461 | 5.358408 | 5.101121 |
| gene-AT1C  | 30.36777 | 31.41539 | 32.52037 | 42.31532 | 42.66254 | 41.30013 | 17.35725 | 18.5045  |
| gene-AT5C  | 4.174587 | 4.539742 | 4.329988 | 1.294222 | 1.298575 | 1.466299 | 1.519933 | 2.167114 |
| gene-AT3C  | 3.452858 | 2.825216 | 2.363451 | 1.989148 | 2.161687 | 2.833468 | 1.129885 | 0.910742 |
| gene-AT3C  | 63.37644 | 65.38014 | 63.23305 | 25.23095 | 27.83179 | 25.75623 | 106.1223 | 110.5947 |
| gene-AT3C  | 3.872095 | 4.380612 | 3.241069 | 3.506967 | 3.823009 | 3.168941 | 4.017323 | 3.065696 |
| gene-AT5C  | 16.74284 | 15.75912 | 16.52511 | 1.626554 | 1.690169 | 1.826715 | 37.18466 | 38.27913 |
| gene-AT2C  | 145.1421 | 151.6624 | 142.1576 | 80.25543 | 88.76328 | 88.43021 | 367.8567 | 341.5859 |
| gene-AT4C  | 5.592193 | 4.965809 | 4.36325  | 7.414539 | 7.128505 | 7.038863 | 0.291937 | 0.26946  |
| gene-AT4C  | 4.808292 | 4.869007 | 4.522014 | 3.812222 | 3.96318  | 3.94049  | 6.962562 | 4.471797 |
| gene-AT4C  | 1.932496 | 2.002149 | 1.341969 | 1.956822 | 2.156637 | 2.086456 | 0.924096 | 0.6863   |
| gene-AT1C  | 1.442158 | 1.105842 | 0.812232 | 0.941363 | 1.033919 | 1.387179 | 2.538161 | 1.722663 |
| gene-AT2C  | 11.52587 | 11.60176 | 12.15656 | 13.13737 | 11.81049 | 13.20996 | 10.8906  | 10.30617 |
| gene-AT3C  | 6.262242 | 6.365073 | 7.30835  | 9.103258 | 7.849539 | 8.011718 | 10.42594 | 11.50263 |
| gene-AT4C  | 16.11622 | 14.60155 | 16.79899 | 12.28572 | 13.1165  | 13.50155 | 22.70191 | 24.43419 |
| gene-AT5C  | 70.00301 | 77.77023 | 75.98217 | 33.275   | 31.44643 | 31.69932 | 38.40633 | 39.1     |
| gene-AT1C  | 0.654081 | 0.529271 | 0.355092 | 1.813506 | 1.859761 | 1.126374 | 0.726315 | 0.719552 |
| gene-AT4C  | 11.78288 | 13.24451 | 13.99278 | 23.36749 | 24.17045 | 20.78267 | 9.400161 | 7.304352 |
| gene-AT5C  | 10.44068 | 8.785198 | 8.3673   | 6.947934 | 7.339036 | 6.296454 | 9.535782 | 12.18499 |
| gene-AT1C  | 2.06159  | 2.076035 | 1.614265 | 3.16834  | 4.001266 | 4.302439 | 1.090823 | 0.760082 |
| gene-AT1C  | 2.215046 | 3.720983 | 2.425848 | 0.643599 | 1.484067 | 0.932478 | 0.471801 | 0.95771  |
| gene-AT5C  | 4.399681 | 4.952795 | 5.298071 | 28.3852  | 31.08076 | 30.09719 | 8.346936 | 7.395011 |
| gene-AT2C  | 1.751154 | 1.338962 | 1.266399 | 1.115797 | 1.211496 | 1.213012 | 1.040146 | 0.93884  |
| gene-AT3C  | 14.04453 | 12.96764 | 14.28092 | 13.32364 | 14.03682 | 10.84802 | 18.90694 | 21.65744 |
| gene-AT5C  | 7.24804  | 5.608005 | 5.488191 | 3.614465 | 2.125874 | 3.147532 | 7.196797 | 7.738216 |
| gene-AT1C  | 5.947828 | 6.434305 | 6.431987 | 5.574612 | 5.119973 | 4.808073 | 8.741716 | 8.640074 |
| gene-AT1C  | 92.20845 | 100.8577 | 101.8718 | 74.46585 | 75.77261 | 82.84208 | 90.83627 | 94.27502 |
| gene-AT1C  | 195.643  | 194.5306 | 197.4959 | 105.6985 | 106.2802 | 110.162  | 172.351  | 170.8494 |
| gene-AT3C  | 10.57154 | 9.39076  | 10.85982 | 5.517198 | 4.773947 | 5.381925 | 14.23061 | 13.87258 |
| gene-AT5C  | 0.263587 | 0.29144  | 0.505684 | 0.325856 | 0.511907 | 0.10891  | 1.333508 | 1.716875 |
| gene-AT2C  | 86.18575 | 92.42513 | 84.14397 | 130.3254 | 131.8102 | 137.3826 | 119.2225 | 117.0038 |
| gene-AT5C  | 3.23935  | 3.389392 | 2.408256 | 1.384156 | 0.925634 | 0.72613  | 3.762494 | 3.065452 |
| gene-AT5C  | 6.643105 | 6.675843 | 8.084755 | 13.07493 | 10.37774 | 16.4644  | 2.589822 | 3.031691 |
| gene-AT1C  | 0.36904  | 0.106538 | 0.287343 | 0        | 0        | 0        | 2.178039 | 2.435431 |
| gene-AT1C  | 2.193104 | 1.988735 | 2.235567 | 0.738616 | 1.427663 | 1.350188 | 0.731611 | 0.560191 |
| gene-AT3C  | 24.17422 | 23.70991 | 27.20318 | 31.68391 | 30.24186 | 31.70456 | 15.26537 | 16.40713 |
| gene-AT2C  | 62.91137 | 62.67944 | 60.54465 | 15.29392 | 13.59817 | 13.99472 | 202.3004 | 216.3544 |
| gene-AT5C  | 9.166102 | 11.0588  | 7.907429 | 4.306262 | 5.441252 | 5.129257 | 13.90535 | 14.18421 |

|           |          |          |          |          |          |          |          |          |
|-----------|----------|----------|----------|----------|----------|----------|----------|----------|
| gene-AT4C | 1.064682 | 1.290236 | 1.34586  | 1.467305 | 1.81398  | 1.618361 | 0.411402 | 0.595407 |
| gene-AT1C | 1.8502   | 2.144197 | 1.54068  | 0.883158 | 0.67986  | 1.17155  | 2.809719 | 1.874121 |
| gene-AT1C | 403.3897 | 406.2131 | 401.7038 | 247.0755 | 252.6879 | 266.7402 | 643.4849 | 659.1227 |
| gene-AT5C | 1.18497  | 1.267689 | 1.52332  | 1.548711 | 1.979064 | 1.402968 | 1.488253 | 1.718931 |
| gene-AT1C | 14.65669 | 13.4362  | 14.35501 | 19.28062 | 19.01579 | 18.60088 | 18.65564 | 18.90939 |
| gene-AT4C | 27.54598 | 27.55785 | 32.4868  | 37.12976 | 33.52729 | 36.51606 | 12.77351 | 14.1378  |
| gene-AT1C | 7.525806 | 5.996249 | 7.005256 | 5.563332 | 5.117898 | 6.040608 | 8.720898 | 11.87418 |
| gene-AT5C | 6.137914 | 5.324781 | 5.218699 | 10.3315  | 9.589892 | 9.187915 | 3.209425 | 2.157257 |
| gene-AT3C | 59.52692 | 56.8906  | 53.76238 | 44.46911 | 46.75777 | 44.25914 | 94.51602 | 93.04437 |
| gene-AT5C | 17.66406 | 17.74908 | 18.98653 | 5.431465 | 5.650819 | 5.966119 | 70.73364 | 73.12258 |
| gene-AT4C | 0.48892  | 0.415229 | 0.643961 | 0.701496 | 0.554394 | 0.453162 | 1.296938 | 0.950747 |
| gene-AT5C | 12.07661 | 11.53611 | 11.65994 | 10.20579 | 9.878927 | 9.888391 | 17.54805 | 18.13509 |
| gene-AT5C | 21.97263 | 20.93882 | 21.45369 | 14.99213 | 16.44578 | 16.50393 | 28.20917 | 27.09057 |
| gene-AT2C | 25.71003 | 23.42798 | 24.26455 | 24.0916  | 24.42988 | 24.27862 | 22.12585 | 24.13137 |
| gene-AT1C | 7.417278 | 8.746698 | 9.344999 | 4.929958 | 4.400925 | 4.059385 | 10.58806 | 9.690903 |
| gene-AT4C | 1.564157 | 2.403856 | 2.795936 | 0.647804 | 0.29492  | 0.606648 | 0.148121 | 0.463532 |
| gene-AT2C | 52.57177 | 53.96233 | 55.06798 | 41.74858 | 38.87401 | 39.78079 | 56.57955 | 58.76818 |
| gene-AT1C | 0.382525 | 0.354246 | 0.708831 | 16.85497 | 16.04624 | 16.02362 | 0.221738 | 0        |
| gene-AT2C | 1.643957 | 1.534809 | 1.783168 | 5.756842 | 4.402965 | 5.165937 | 1.772359 | 1.646647 |
| gene-AT5C | 7.033125 | 7.32897  | 5.558532 | 2.550757 | 2.676542 | 2.600535 | 1.861482 | 1.919445 |
| gene-AT5C | 0.373895 | 0.32288  | 0.447608 | 0.693592 | 0.819087 | 1.299787 | 1.072637 | 2.067087 |
| gene-AT1C | 5.515095 | 4.857348 | 4.797529 | 6.519906 | 5.911575 | 7.064032 | 6.217173 | 6.762175 |
| gene-AT1C | 37.91762 | 36.97571 | 33.79016 | 14.86659 | 15.21378 | 17.14607 | 53.07957 | 50.65495 |
| gene-AT1C | 15.0487  | 14.99873 | 11.67293 | 25.60025 | 22.45531 | 24.48109 | 4.339964 | 6.601353 |
| gene-AT2C | 6.83696  | 6.273324 | 6.756888 | 7.702168 | 7.184194 | 7.782592 | 7.33541  | 7.941062 |
| gene-AT3C | 14.61837 | 15.76216 | 14.52358 | 43.51403 | 46.40142 | 44.79496 | 10.53183 | 10.55582 |
| gene-AT5C | 23.79002 | 23.05968 | 23.82016 | 18.33936 | 16.1072  | 16.93088 | 35.60104 | 34.40298 |
| gene-AT3C | 0.464739 | 0.479973 | 0.523708 | 1.235476 | 1.416846 | 1.283963 | 0.687568 | 0.872892 |
| gene-AT2C | 236.29   | 224.703  | 231.4922 | 449.4297 | 448.3879 | 461.799  | 120.1443 | 122.2025 |
| gene-AT5C | 0.161901 | 0.600604 | 0.098614 | 1.172584 | 0.9674   | 0.711001 | 0.827208 | 0.966527 |
| gene-AT4C | 12.26524 | 10.99356 | 11.46893 | 14.82576 | 14.31092 | 16.59115 | 13.04321 | 11.30781 |
| gene-AT2C | 21.49569 | 22.07453 | 20.95945 | 12.13634 | 11.48867 | 11.69567 | 18.73792 | 20.43044 |
| gene-AT2C | 29.11404 | 28.49206 | 30.12193 | 15.60758 | 16.40505 | 14.97524 | 52.68579 | 53.30885 |
| gene-AT1C | 1113.735 | 1103.921 | 1121.044 | 541.1619 | 535.1069 | 533.6975 | 1713.265 | 1775.3   |
| gene-AT3C | 12.15282 | 13.39161 | 15.07052 | 10.69051 | 11.01507 | 10.18225 | 16.2952  | 16.5148  |
| gene-AT4C | 126.363  | 121.8325 | 120.1206 | 226.5188 | 233.1275 | 229.175  | 74.17796 | 72.77994 |
| gene-AT3C | 115.7201 | 115.3157 | 105.9161 | 101.7067 | 100.602  | 100.6108 | 49.53048 | 47.45075 |
| gene-AT5C | 1.375325 | 2.494238 | 1.992053 | 2.35396  | 2.891191 | 2.330671 | 0.978473 | 1.163987 |
| gene-AT2C | 0.222033 | 0.518874 | 0.816851 | 1.988173 | 2.034669 | 1.682901 | 0.311927 | 0.388537 |
| gene-AT4C | 1.662443 | 1.687416 | 1.523634 | 3.021253 | 2.687494 | 3.159385 | 0.691461 | 0.805934 |
| gene-AT1C | 8.426631 | 8.937656 | 7.92981  | 8.882201 | 8.504271 | 7.545871 | 5.775165 | 7.479156 |
| gene-AT5C | 5.056895 | 3.763064 | 6.356875 | 11.16648 | 10.51296 | 10.8372  | 7.543882 | 7.042029 |
| gene-AT5C | 3.342009 | 3.058407 | 3.240925 | 0.502013 | 0.248027 | 0.543894 | 0.021848 | 0.14387  |
| gene-AT4C | 21.24709 | 20.47733 | 20.00311 | 140.7026 | 129.3537 | 136.9898 | 18.20138 | 20.16132 |
| gene-AT1C | 6431.695 | 6262.263 | 6461.638 | 4534.314 | 4518.575 | 4464.882 | 8678.793 | 8845.758 |
| gene-AT1C | 12.37511 | 11.82638 | 12.43795 | 14.88166 | 13.92864 | 15.19077 | 3.102556 | 1.935862 |
| gene-AT2C | 12.74706 | 9.846916 | 12.26852 | 6.541147 | 6.578805 | 6.436511 | 2.253828 | 2.449879 |
| gene-AT1C | 1.489501 | 1.28756  | 0.984572 | 0.894424 | 0.875619 | 1.161478 | 1.963916 | 2.767637 |
| gene-AT3C | 9.887204 | 7.852511 | 8.557095 | 12.98899 | 11.30327 | 10.46975 | 4.426388 | 4.879006 |
| gene-AT1C | 3.672546 | 2.983227 | 3.595234 | 6.512659 | 7.418661 | 6.976266 | 2.214908 | 2.999943 |
| gene-AT2C | 7.045264 | 7.117465 | 5.785254 | 13.72747 | 11.8746  | 13.76098 | 5.866663 | 5.935055 |



|           |          |          |          |          |          |          |          |          |
|-----------|----------|----------|----------|----------|----------|----------|----------|----------|
| gene-AT5C | 3.294535 | 2.283804 | 3.328211 | 0.662006 | 1.07207  | 0.966425 | 0.343731 | 0.407397 |
| gene-AT5C | 5.548762 | 5.483528 | 8.226497 | 18.03449 | 17.27865 | 17.91951 | 9.895368 | 9.871889 |
| gene-AT1C | 65.86425 | 67.42442 | 69.31973 | 41.70893 | 46.065   | 44.5446  | 111.6919 | 110.7953 |
| gene-AT1C | 106.0679 | 104.0424 | 109.2351 | 87.71364 | 87.0615  | 85.87219 | 156.9586 | 163.9489 |
| gene-AT1C | 18.60965 | 16.64138 | 19.18401 | 14.63458 | 12.12992 | 12.71882 | 28.07638 | 27.41539 |
| gene-AT5C | 14.34151 | 16.64422 | 15.85879 | 11.553   | 10.91683 | 9.666983 | 26.28716 | 26.52855 |
| gene-AT2C | 12.0485  | 11.0071  | 11.05175 | 1.960969 | 2.557083 | 2.014168 | 0.496192 | 0.398245 |
| gene-AT2C | 4.226556 | 3.635386 | 4.563491 | 4.11562  | 4.937814 | 4.419471 | 5.319533 | 5.094414 |
| gene-AT1C | 13.18149 | 12.48151 | 13.69807 | 10.64086 | 11.38648 | 11.00391 | 4.728102 | 4.879177 |
| gene-AT3C | 0        | 0        | 0.046036 | 0.698256 | 0.147558 | 0.79188  | 0.021132 | 0        |
| gene-AT1C | 0.214734 | 0.368058 | 0.257432 | 0.164904 | 0.401946 | 0.374878 | 0.379788 | 0.35832  |
| gene-AT5C | 1.774782 | 2.421758 | 1.66764  | 1.675712 | 1.659624 | 2.222717 | 1.243209 | 1.381243 |
| gene-AT1C | 0.042009 | 0.15891  | 0.26221  | 0.374301 | 0.453027 | 0.784834 | 0.025362 | 0        |
| gene-AT3C | 19.11738 | 23.27252 | 19.96799 | 19.54757 | 20.86644 | 17.67343 | 10.31742 | 11.09362 |
| gene-AT3C | 23.69411 | 29.61647 | 32.0184  | 9.328033 | 8.931961 | 7.240404 | 43.80975 | 37.90288 |
| gene-AT2C | 33.05071 | 33.78912 | 35.24133 | 32.12132 | 36.70536 | 34.21668 | 2.93318  | 4.406528 |
| gene-AT1C | 5.381325 | 4.824691 | 5.068032 | 16.89539 | 14.97447 | 14.28487 | 0.514878 | 0.660766 |
| gene-AT2C | 0.306994 | 0.520511 | 0.337049 | 0.685546 | 0.654018 | 0.603727 | 1.948198 | 0.876468 |
| gene-AT5C | 12.21766 | 11.45482 | 11.47706 | 18.47063 | 16.93353 | 16.36633 | 2.858009 | 3.148917 |
| gene-AT4C | 9.424958 | 9.572518 | 11.0523  | 6.635842 | 8.412209 | 8.274994 | 3.817707 | 4.610248 |
| gene-AT1C | 30.93176 | 28.82556 | 30.46282 | 31.88511 | 33.02422 | 33.15812 | 43.16862 | 46.67126 |
| gene-AT1C | 0.662184 | 0.881202 | 0.961639 | 0.295564 | 0.241825 | 0.330967 | 1.454532 | 1.625027 |
| gene-AT4C | 26.00398 | 26.31028 | 28.09656 | 15.83575 | 17.50891 | 19.44255 | 43.26384 | 44.78116 |
| gene-AT1C | 0.224218 | 0.233548 | 0.403757 | 1.278794 | 0.775608 | 0.806977 | 0.503849 | 0.741244 |
| gene-AT3C | 0.832892 | 0.928423 | 0.497492 | 1.046226 | 1.558172 | 1.333796 | 0.183856 | 0.164026 |
| gene-AT2C | 0.91786  | 1.097541 | 1.452067 | 1.028384 | 1.032406 | 0.812501 | 0.135495 | 0        |
| gene-AT4C | 6.843453 | 6.993826 | 6.447054 | 9.212829 | 9.126888 | 9.485748 | 15.30845 | 15.62309 |
| gene-AT2C | 0.816329 | 0.64513  | 0.907995 | 1.12966  | 0.861616 | 0.765724 | 0.244815 | 0.407994 |
| gene-AT5C | 33.00628 | 37.1113  | 34.77082 | 30.14424 | 30.26658 | 32.11219 | 58.73209 | 57.78624 |
| gene-AT3C | 36.08185 | 32.93165 | 34.45101 | 29.97094 | 29.14332 | 31.92799 | 40.34138 | 45.78537 |
| gene-AT2C | 7.541144 | 9.13739  | 7.663832 | 23.39737 | 23.65637 | 25.19246 | 4.791353 | 5.202447 |
| gene-AT5C | 3.46031  | 4.026605 | 2.783751 | 7.058522 | 6.887155 | 7.175368 | 0.285254 | 0.211423 |
| gene-AT2C | 102.8043 | 109.9021 | 113.7296 | 84.52416 | 81.57195 | 85.71062 | 198.844  | 185.5506 |
| gene-AT4C | 38.4288  | 37.84214 | 37.3668  | 24.0472  | 23.07363 | 23.61266 | 29.97906 | 30.12215 |
| gene-AT3C | 0.90662  | 1.025551 | 1.055386 | 0.336676 | 0.199967 | 0.233333 | 1.573151 | 1.593299 |
| gene-AT2C | 1.101709 | 1.133219 | 1.425988 | 0.713924 | 0.91281  | 0.680275 | 1.255717 | 1.442414 |
| gene-AT1C | 12.05611 | 12.30312 | 13.37862 | 6.667487 | 6.070779 | 5.429005 | 17.14987 | 16.57831 |
| gene-AT5C | 3.292167 | 3.247513 | 3.416107 | 6.100148 | 6.008922 | 6.004856 | 1.977406 | 2.69218  |
| gene-AT5C | 1.2706   | 0.703603 | 1.317952 | 0.90155  | 1.434525 | 0.604254 | 2.606708 | 2.483148 |
| gene-AT5C | 12.27575 | 11.66251 | 13.46588 | 4.764368 | 4.791031 | 5.37701  | 5.263571 | 5.242393 |
| gene-AT2C | 14.23855 | 13.60073 | 14.99677 | 12.21798 | 12.67986 | 12.08548 | 4.655621 | 5.639945 |
| gene-AT2C | 2.930392 | 2.310573 | 2.994977 | 4.526748 | 4.476734 | 4.919134 | 2.280733 | 1.590653 |
| gene-AT3C | 277.3417 | 271.1907 | 273.8529 | 868.9837 | 869.6764 | 878.001  | 248.3508 | 252.4684 |
| gene-AT1C | 70.01396 | 68.06142 | 73.01469 | 72.00188 | 71.92261 | 71.55784 | 72.94729 | 72.99019 |
| gene-AT2C | 13.9253  | 12.74952 | 12.51696 | 9.057844 | 8.705939 | 10.12706 | 16.69969 | 18.19319 |
| gene-AT1C | 8.449444 | 8.899993 | 9.422598 | 12.23787 | 12.62213 | 13.34208 | 6.617082 | 7.141482 |
| gene-AT5C | 2.542369 | 4.063419 | 3.170449 | 1.567204 | 0.972854 | 1.241569 | 0.576345 | 0.4334   |
| gene-AT4C | 10.85608 | 9.984537 | 10.23053 | 16.36213 | 17.06555 | 16.13506 | 5.026546 | 5.700813 |
| gene-AT3C | 3.750568 | 2.460519 | 3.659395 | 0.828635 | 0.849164 | 0.772492 | 0.166166 | 0.077179 |
| gene-AT2C | 14.56025 | 13.78362 | 15.92601 | 11.13462 | 13.66331 | 12.0829  | 19.49857 | 19.4567  |
| gene-AT2C | 2.542974 | 2.706882 | 2.579036 | 3.703516 | 3.204503 | 3.897529 | 1.504873 | 1.971718 |

|            |          |          |          |          |          |          |          |          |
|------------|----------|----------|----------|----------|----------|----------|----------|----------|
| gene-AT4C  | 3.083427 | 2.065774 | 2.298802 | 2.490145 | 2.826804 | 2.471843 | 0.920893 | 1.081322 |
| gene-AT5C  | 55.55455 | 52.22542 | 54.88989 | 135.8488 | 130.7605 | 132.5278 | 36.48119 | 37.62354 |
| gene-AT5C  | 35.48849 | 37.02218 | 35.37479 | 18.39335 | 16.71763 | 16.21125 | 63.25314 | 63.82943 |
| gene-AT1C  | 14.95263 | 13.97434 | 15.42407 | 29.15494 | 31.52165 | 31.70264 | 18.88268 | 20.16233 |
| gene-AT5C  | 0.9736   | 0.762362 | 0.436951 | 2.454129 | 1.12437  | 2.575879 | 0.904412 | 0.866925 |
| gene-AT1C  | 6.146244 | 5.38863  | 5.089062 | 3.700287 | 3.587917 | 3.288491 | 4.158715 | 5.523885 |
| gene-AT2C  | 3.691906 | 2.847896 | 4.155576 | 2.979946 | 4.176292 | 2.433034 | 3.586184 | 4.573372 |
| Arabidopsi | 1.353564 | 1.58978  | 1.733114 | 0.88382  | 1.093934 | 1.16441  | 0.97675  | 1.588986 |
| gene-AT5C  | 8.881326 | 6.989854 | 8.679149 | 6.448624 | 6.470154 | 6.489046 | 5.784387 | 6.277331 |
| gene-AT5C  | 3.424329 | 3.444969 | 3.284123 | 3.202709 | 3.004813 | 2.694265 | 2.966981 | 2.195739 |
| gene-AT1C  | 9.746736 | 10.09733 | 9.291472 | 2.534295 | 2.898615 | 2.377257 | 17.00721 | 16.71022 |
| gene-AT5C  | 3.475353 | 5.074769 | 2.783858 | 7.672755 | 7.576417 | 6.323074 | 2.18026  | 2.43489  |
| gene-AT4C  | 0.394056 | 0.401579 | 0.221907 | 0.984742 | 0.842736 | 0.693915 | 0.652671 | 0.841493 |
| gene-AT1C  | 1.449995 | 0.90779  | 1.128255 | 1.247591 | 0.816751 | 1.019941 | 0.557584 | 0.61963  |
| gene-AT1C  | 0.741074 | 0.451153 | 0.402522 | 1.820427 | 1.964054 | 2.036869 | 2.734149 | 2.2851   |
| gene-AT1C  | 2.869025 | 2.270982 | 2.341506 | 5.85877  | 4.735034 | 5.361832 | 2.327008 | 2.537139 |
| gene-AT5C  | 74.84885 | 74.89225 | 73.89721 | 57.10044 | 57.88215 | 57.15719 | 113.4693 | 114.7863 |
| gene-AT2C  | 12.53366 | 12.41452 | 12.33978 | 12.92036 | 11.18007 | 10.2945  | 27.01046 | 25.01578 |
| gene-AT1C  | 7.703795 | 9.503481 | 8.498665 | 5.732112 | 5.444608 | 5.208055 | 6.846849 | 6.225519 |
| gene-AT4C  | 1.264856 | 2.006177 | 1.786927 | 0.448429 | 0.539626 | 0.356664 | 1.150286 | 1.285722 |
| gene-AT3C  | 12.99347 | 13.69011 | 11.93438 | 33.16725 | 29.89371 | 31.07152 | 12.98349 | 12.74615 |
| gene-AT2C  | 30.41521 | 28.73429 | 29.37675 | 52.64584 | 49.86426 | 49.65151 | 28.10098 | 26.6338  |
| gene-AT2C  | 15.0245  | 14.02216 | 15.23654 | 26.5378  | 26.90908 | 24.40975 | 2.288348 | 3.669595 |
| gene-AT1C  | 28.23065 | 28.3861  | 28.59204 | 7.499111 | 9.960732 | 7.640063 | 6.423521 | 5.927053 |
| gene-AT5C  | 2.67796  | 2.577608 | 2.283189 | 3.552326 | 4.002117 | 4.192513 | 0.656892 | 0.639858 |
| gene-AT4C  | 1.588587 | 1.666984 | 1.695732 | 1.937459 | 1.780466 | 1.447438 | 0.713438 | 0.738465 |
| gene-AT3C  | 1.281908 | 1.245901 | 0.887696 | 1.071207 | 1.412794 | 1.483872 | 0.840801 | 0.862673 |
| gene-AT2C  | 15.55991 | 13.34538 | 15.86874 | 15.37764 | 16.34786 | 17.18335 | 8.334095 | 7.528917 |
| gene-AT4C  | 2.473937 | 2.28435  | 2.062886 | 1.552588 | 1.770287 | 2.111446 | 5.603796 | 5.163519 |
| gene-AT4C  | 16.06138 | 17.87043 | 14.40423 | 37.53394 | 35.39193 | 37.90195 | 35.15308 | 33.65564 |
| gene-AT3C  | 37.54335 | 37.08525 | 36.6194  | 23.44658 | 21.32885 | 22.81709 | 51.83796 | 57.94286 |
| gene-AT3C  | 4.087508 | 4.727456 | 4.877777 | 4.725746 | 5.881644 | 5.612628 | 5.803156 | 6.96695  |
| gene-AT4C  | 0.949966 | 1.81877  | 1.178749 | 1.447842 | 0.955619 | 0.827662 | 1.756581 | 2.176933 |
| gene-AT5C  | 15.51563 | 15.50331 | 13.76334 | 38.59635 | 37.32076 | 38.4697  | 7.235412 | 7.567657 |
| gene-AT4C  | 1.945042 | 1.372023 | 1.565054 | 0.343841 | 1.352246 | 0.687936 | 6.775659 | 6.552525 |
| gene-AT5C  | 8.26854  | 9.359549 | 9.856206 | 8.856411 | 9.709277 | 10.13979 | 13.64405 | 12.67476 |
| gene-AT3C  | 2.841496 | 2.892936 | 3.448733 | 8.742038 | 9.565012 | 8.266017 | 2.882762 | 2.52652  |
| gene-AT2C  | 31.08164 | 29.83483 | 32.71653 | 23.308   | 23.52408 | 23.95696 | 29.24733 | 31.19397 |
| gene-AT3C  | 1.739654 | 1.346125 | 1.542711 | 1.776285 | 2.170685 | 2.110356 | 0.856988 | 0.491567 |
| gene-AT3C  | 84.0494  | 80.46906 | 82.19638 | 45.5297  | 42.04967 | 43.3761  | 68.80776 | 71.01265 |
| gene-AT4C  | 12.32037 | 12.54248 | 11.78586 | 4.917576 | 5.05753  | 4.829783 | 5.110319 | 4.337922 |
| gene-AT3C  | 110.6532 | 110.7929 | 111.3267 | 82.18573 | 79.12807 | 81.19588 | 161.3849 | 169.0544 |
| gene-AT4C  | 20.8518  | 19.69291 | 20.25576 | 14.56555 | 14.75362 | 14.36805 | 6.783919 | 6.806501 |
| gene-AT3C  | 3.807787 | 3.497064 | 4.404902 | 5.36907  | 5.007049 | 4.53072  | 2.695599 | 2.24328  |
| gene-AT2C  | 3.934905 | 5.222246 | 5.037814 | 9.739996 | 9.595057 | 9.685487 | 7.978975 | 7.614288 |
| gene-AT1C  | 0.636824 | 0.950991 | 0.42023  | 0.251371 | 0.679918 | 0.746345 | 1.501315 | 1.580891 |
| gene-AT2C  | 2.223591 | 2.058801 | 1.976318 | 1.209732 | 1.17885  | 1.011905 | 2.851024 | 2.851015 |
| gene-AT3C  | 15.08941 | 18.18047 | 16.91305 | 25.88762 | 19.39442 | 20.19462 | 14.16935 | 12.91626 |
| gene-AT3C  | 1.722299 | 2.678537 | 2.651115 | 5.255958 | 5.369499 | 5.656728 | 2.910512 | 3.650836 |
| gene-AT4C  | 40.9662  | 38.87135 | 42.12866 | 28.11397 | 28.70602 | 29.12834 | 57.77158 | 58.00848 |
| gene-AT5C  | 1.314978 | 1.736339 | 1.347285 | 1.177809 | 1.229224 | 1.288836 | 0.567611 | 0.49002  |

|            |          |          |          |          |          |          |          |          |
|------------|----------|----------|----------|----------|----------|----------|----------|----------|
| gene-AT1C  | 0.108569 | 0        | 0        | 1.47407  | 1.296419 | 1.319923 | 0        | 0.349332 |
| gene-AT1C  | 1.643495 | 1.425384 | 0.925941 | 1.900699 | 1.917231 | 1.139657 | 0.528801 | 0.646557 |
| gene-AT5C  | 9.997561 | 9.893018 | 9.6672   | 12.93601 | 13.2292  | 13.46771 | 5.221676 | 5.286228 |
| gene-AT2C  | 33.63846 | 34.12173 | 33.42912 | 11.77414 | 10.77855 | 11.0973  | 19.57494 | 20.76417 |
| gene-AT2C  | 318.2418 | 340.3711 | 329.6171 | 268.785  | 267.0274 | 276.5692 | 259.9096 | 249.2247 |
| gene-AT2C  | 10.49852 | 10.64645 | 12.5045  | 8.583422 | 8.517578 | 6.60447  | 17.28549 | 14.89469 |
| gene-AT5C  | 3.671736 | 3.575131 | 3.842085 | 3.048314 | 2.94103  | 2.418273 | 1.099746 | 0.939459 |
| gene-AT1C  | 105.2459 | 104.8707 | 105.4064 | 61.10035 | 68.8093  | 64.95127 | 198.9212 | 212.718  |
| gene-AT5C  | 3.193296 | 4.920185 | 5.459694 | 4.898326 | 5.646652 | 3.773471 | 1.975135 | 1.923013 |
| gene-AT2C  | 0.747545 | 1.582754 | 1.474787 | 1.935982 | 2.115681 | 2.413942 | 4.666975 | 2.969149 |
| Arabidopsi | 2.88904  | 3.518276 | 3.113549 | 3.746677 | 3.535575 | 4.47525  | 2.212036 | 1.854151 |
| Arabidopsi | 0.515823 | 0.524368 | 0.656291 | 0.517824 | 0.239458 | 0.219087 | 0.71054  | 0.891936 |
| gene-AT1C  | 0.28219  | 0.581998 | 0.24644  | 0.488263 | 0.478054 | 0.703102 | 0.384342 | 0.078134 |
| gene-AT4C  | 115.9742 | 112.51   | 117.0474 | 88.66671 | 90.85085 | 87.36091 | 197.8285 | 198.0263 |
| gene-AT3C  | 34.11421 | 33.03605 | 34.15507 | 22.33752 | 21.21639 | 20.25076 | 43.90132 | 46.71557 |
| gene-AT1C  | 8.915332 | 9.483534 | 9.653286 | 29.84904 | 29.31971 | 29.54074 | 7.291985 | 6.332104 |
| gene-AT1C  | 7.074565 | 8.65525  | 6.994498 | 5.76725  | 6.641548 | 5.245885 | 11.45437 | 12.03998 |
| gene-AT5C  | 6.803443 | 6.561124 | 6.228639 | 15.97021 | 14.81616 | 15.52686 | 5.06173  | 5.535668 |
| gene-AT1C  | 3.429158 | 3.301911 | 2.78041  | 2.678463 | 3.125688 | 2.442119 | 2.274411 | 3.114216 |
| gene-AT1C  | 2.656526 | 2.855857 | 3.265437 | 6.588299 | 6.127799 | 5.503686 | 2.89648  | 2.742055 |
| gene-AT4C  | 75.20549 | 72.69058 | 74.57707 | 78.54643 | 74.43071 | 80.90992 | 143.0935 | 144.2106 |
| gene-AT1C  | 4.247471 | 4.071672 | 5.331318 | 3.902365 | 4.22116  | 4.224552 | 7.06631  | 6.693134 |
| gene-AT3C  | 26.49481 | 28.97392 | 27.97183 | 16.75692 | 16.3544  | 15.62291 | 2.709772 | 3.26905  |
| gene-AT1C  | 12.95986 | 11.88311 | 11.41818 | 7.512922 | 6.428817 | 6.14187  | 5.616638 | 7.084459 |
| gene-AT5C  | 1.657374 | 1.076454 | 1.281883 | 2.464089 | 2.326072 | 2.35607  | 1.01908  | 0.893563 |
| gene-AT3C  | 1.212456 | 0.761793 | 1.674676 | 2.271281 | 2.251611 | 2.037212 | 0.994855 | 1.069787 |
| gene-AT3C  | 1.818012 | 1.582217 | 2.286361 | 1.387936 | 1.059467 | 1.306928 | 0.566534 | 0.641565 |
| gene-AT3C  | 11.81905 | 12.46073 | 13.95842 | 10.29756 | 9.034276 | 10.92743 | 4.790491 | 5.350289 |
| gene-AT4C  | 0.696099 | 1.365625 | 1.172422 | 1.387349 | 1.033919 | 1.151492 | 3.733372 | 3.047935 |
| gene-AT3C  | 0        | 0        | 0        | 8.433656 | 8.228928 | 9.27215  | 0.256942 | 0.04355  |
| gene-AT5C  | 2.125358 | 2.292224 | 2.299273 | 5.401011 | 4.833704 | 5.375606 | 2.368513 | 3.125924 |
| gene-AT1C  | 2.798196 | 2.887139 | 3.482086 | 9.775565 | 10.32439 | 8.960264 | 3.884875 | 2.406793 |
| gene-AT4C  | 5.286355 | 6.053688 | 5.392531 | 4.476742 | 4.606322 | 5.104714 | 7.088215 | 8.74995  |
| gene-AT4C  | 1.07403  | 0.87197  | 0.930731 | 1.5122   | 1.84543  | 2.000896 | 0.665102 | 0.400821 |
| gene-AT1C  | 140.9256 | 141.052  | 155.5505 | 312.2749 | 294.9124 | 302.9021 | 61.84706 | 62.02758 |
| gene-AT2C  | 4.008318 | 3.932967 | 4.501981 | 6.437745 | 8.335608 | 8.692254 | 12.48908 | 7.014438 |
| gene-AT4C  | 11.46456 | 11.50032 | 12.26708 | 7.032151 | 7.64089  | 7.555219 | 11.15262 | 11.43423 |
| gene-AT1C  | 43.18202 | 44.11746 | 45.94572 | 37.07781 | 37.15691 | 41.07795 | 64.98634 | 68.35298 |
| gene-AT3C  | 1.672189 | 1.627987 | 1.385383 | 1.276206 | 1.016817 | 1.894752 | 1.674507 | 2.187399 |
| gene-AT5C  | 0.800483 | 0.786343 | 0.614377 | 1.930238 | 1.564477 | 2.135876 | 0.775801 | 1.265584 |
| gene-AT5C  | 81.2577  | 82.97624 | 80.19505 | 40.85836 | 42.66676 | 40.97207 | 103.617  | 106.3967 |
| gene-AT1C  | 150.7452 | 162.4605 | 150.5652 | 115.2628 | 112.7587 | 109.8826 | 302.3016 | 308.1769 |
| gene-AT3C  | 113.5674 | 112.187  | 116.3527 | 37.78993 | 37.37767 | 41.3237  | 25.86571 | 27.16477 |
| gene-AT5C  | 30.41822 | 26.03896 | 27.96444 | 22.84937 | 21.51933 | 22.76872 | 43.05636 | 44.45821 |
| gene-AT1C  | 12.62703 | 12.44204 | 11.42555 | 49.75441 | 45.69052 | 47.9435  | 0.506388 | 0.490345 |
| gene-AT3C  | 4.148483 | 4.577436 | 5.225492 | 5.4334   | 4.393315 | 4.959518 | 6.530996 | 6.05124  |
| gene-AT3C  | 1.415571 | 0.871467 | 1.423106 | 1.631856 | 0.951276 | 1.594564 | 0.619287 | 0.532436 |
| gene-AT1C  | 32.43084 | 28.60374 | 32.98322 | 34.51669 | 41.11875 | 39.25011 | 1.555758 | 1.312672 |
| gene-AT3C  | 3.209739 | 4.488559 | 3.55134  | 2.406544 | 3.065568 | 2.173038 | 6.608423 | 7.106295 |
| gene-AT3C  | 1.313994 | 2.004414 | 2.000205 | 3.662819 | 4.970858 | 3.005344 | 1.745104 | 2.405965 |
| gene-AT5C  | 9.53412  | 9.027601 | 8.290939 | 1.467882 | 2.372408 | 2.628786 | 9.46069  | 9.538734 |

|            |          |          |          |          |          |          |          |          |
|------------|----------|----------|----------|----------|----------|----------|----------|----------|
| gene-AT1C  | 29.8488  | 29.30475 | 27.82617 | 18.20162 | 19.3844  | 16.27599 | 43.8847  | 43.16113 |
| gene-AT1C  | 8.6575   | 7.944255 | 10.03814 | 10.86816 | 10.43126 | 10.86227 | 4.807944 | 4.532636 |
| gene-AT3C  | 1.254979 | 1.503298 | 1.218398 | 1.788709 | 1.788787 | 1.948664 | 1.011295 | 1.183118 |
| gene-AT1C  | 2.77443  | 3.656134 | 2.858768 | 2.91686  | 2.774093 | 2.723349 | 3.868523 | 3.764731 |
| gene-AT5C  | 8.05797  | 7.708161 | 9.183611 | 8.405302 | 8.384871 | 8.109088 | 10.24003 | 11.60733 |
| gene-AT3C  | 1.881455 | 1.576965 | 1.789235 | 2.542392 | 1.611045 | 1.5491   | 0.619448 | 0.642285 |
| Arabidopsi | 1.89814  | 1.197344 | 2.216624 | 1.062451 | 0.199081 | 0.727009 | 0.73386  | 0.812307 |
| gene-AT4C  | 65.1035  | 60.05837 | 65.16402 | 73.28511 | 81.30655 | 72.47446 | 16.82037 | 17.8339  |
| gene-AT3C  | 11.94731 | 14.49016 | 9.993394 | 12.83374 | 12.02523 | 15.43564 | 6.46289  | 10.21315 |
| gene-AT5C  | 5.937866 | 5.481662 | 6.74693  | 7.75287  | 7.385385 | 6.770418 | 8.043634 | 8.26494  |
| gene-AT4C  | 12.85561 | 13.13092 | 12.86927 | 20.77848 | 20.13567 | 19.46209 | 8.863172 | 9.350799 |
| gene-AT5C  | 0.618276 | 0.491483 | 0.533601 | 0.259667 | 0.09368  | 0.051365 | 0.058755 | 0.105347 |
| gene-AT3C  | 1.538805 | 1.69364  | 1.682714 | 2.392984 | 2.132928 | 2.326608 | 0.771702 | 0.665459 |
| gene-AT1C  | 0.526643 | 0.339836 | 0.587498 | 1.670929 | 1.812041 | 1.805384 | 0.614406 | 0.420797 |
| gene-AT1C  | 1.116452 | 1.956896 | 1.179531 | 3.096201 | 3.651768 | 3.133782 | 1.251432 | 1.552222 |
| gene-AT3C  | 1.235105 | 0.775078 | 1.114951 | 1.084452 | 1.025073 | 0.98677  | 0.428488 | 0.521688 |
| gene-AT5C  | 0.077152 | 0.21726  | 0.153551 | 0.639312 | 0.884296 | 1.003221 | 0.316445 | 0.407831 |
| gene-AT4C  | 9.625768 | 9.680099 | 10.19847 | 9.86162  | 10.4998  | 9.231231 | 10.05244 | 11.90001 |
| gene-AT5C  | 6.506409 | 5.049131 | 5.616289 | 5.880243 | 6.216355 | 5.77306  | 1.547812 | 1.236801 |
| gene-AT5C  | 2.359531 | 3.45661  | 2.249662 | 7.488496 | 4.879961 | 8.814219 | 2.755375 | 1.762758 |
| gene-AT1C  | 16.93775 | 13.62834 | 14.03698 | 30.31434 | 32.04628 | 30.99682 | 10.39832 | 10.49111 |
| gene-AT2C  | 1.482292 | 2.499316 | 1.731824 | 1.887325 | 2.681162 | 2.504019 | 1.037843 | 0.95012  |
| gene-AT2C  | 79.71845 | 80.8762  | 79.41187 | 162.7951 | 171.0533 | 166.6639 | 51.47938 | 51.71636 |
| gene-AT5C  | 7.411176 | 8.147703 | 7.918704 | 13.48923 | 12.32993 | 10.98111 | 4.526571 | 4.202335 |
| gene-AT4C  | 12.33252 | 11.00233 | 11.70165 | 7.857113 | 7.219201 | 7.933895 | 13.68191 | 14.77886 |
| gene-AT3C  | 153.3398 | 151.7863 | 149.2169 | 106.0962 | 106.32   | 106.0743 | 285.1908 | 295.6655 |
| gene-AT3C  | 5.335    | 4.378032 | 5.627454 | 0.923212 | 1.053409 | 0.925677 | 0.14415  | 0.231931 |
| gene-AT1C  | 1.098623 | 0.48653  | 1.251632 | 2.338771 | 1.601144 | 1.265383 | 0.232682 | 0.149273 |
| gene-AT5C  | 0.945615 | 1.104413 | 0.791479 | 1.452363 | 1.082018 | 0.69137  | 1.760728 | 1.868356 |
| gene-AT1C  | 98.60944 | 98.60785 | 94.55443 | 150.8159 | 146.1096 | 147.5677 | 240.9922 | 252.0985 |
| gene-AT5C  | 6.752083 | 7.46692  | 5.704369 | 2.895616 | 3.988073 | 4.837659 | 7.246176 | 5.906683 |
| gene-AT2C  | 9.972577 | 8.959218 | 10.08504 | 5.223684 | 5.696229 | 5.219125 | 10.36468 | 11.36864 |
| gene-AT5C  | 2.001515 | 2.752909 | 2.382103 | 1.638163 | 1.670816 | 1.634556 | 3.169106 | 3.906447 |
| gene-AT1C  | 0.849243 | 0.299429 | 0.114281 | 0.671423 | 0.696465 | 0.615942 | 2.617957 | 1.703792 |
| gene-AT1C  | 2.430984 | 2.155    | 2.395058 | 6.619963 | 4.684587 | 5.445919 | 1.886158 | 1.658369 |
| gene-AT1C  | 696.9684 | 678.3795 | 682.9358 | 1607.262 | 1594.923 | 1585.574 | 297.2516 | 298.7573 |
| gene-AT5C  | 2.090211 | 1.863854 | 1.815758 | 9.028728 | 9.972136 | 9.446955 | 2.138569 | 2.222008 |
| gene-AT1C  | 1.476144 | 3.021355 | 1.235078 | 0.330237 | 0.301546 | 0.111698 | 2.74418  | 3.357693 |
| gene-AT4C  | 8.967431 | 8.551414 | 8.409697 | 9.906182 | 9.117174 | 10.64579 | 10.14454 | 11.2163  |
| gene-AT1C  | 45.06234 | 46.84804 | 50.70124 | 46.89386 | 44.11497 | 44.3086  | 64.20225 | 67.21156 |
| gene-AT3C  | 276.2483 | 276.5656 | 279.3764 | 123.5467 | 131.9478 | 122.9588 | 506.6451 | 509.756  |
| gene-AT4C  | 139.9052 | 134.3602 | 133.3096 | 77.50214 | 72.24905 | 68.29585 | 241.0836 | 245.6932 |
| gene-AT4C  | 32.43491 | 33.85535 | 32.30268 | 12.72682 | 13.60224 | 12.75366 | 38.6761  | 35.59321 |
| gene-AT2C  | 28.09987 | 25.39734 | 27.29931 | 22.70055 | 21.99877 | 19.45464 | 43.77353 | 45.24611 |
| gene-AT1C  | 0.508213 | 0.528703 | 0.307295 | 0.8091   | 0.691703 | 0.673358 | 0.226472 | 0.229127 |
| gene-AT5C  | 3.614964 | 3.946965 | 5.390561 | 4.451794 | 5.835933 | 4.602036 | 5.876965 | 5.905971 |
| gene-AT3C  | 37.599   | 34.85159 | 39.02493 | 35.38984 | 36.7165  | 36.31365 | 11.64543 | 11.57284 |
| gene-AT4C  | 11.35794 | 10.59295 | 10.93814 | 6.88057  | 6.347588 | 6.918264 | 12.34375 | 12.81984 |
| gene-AT2C  | 3.598836 | 3.419342 | 4.285113 | 11.98981 | 12.01608 | 11.67201 | 1.097243 | 1.707831 |
| gene-AT5C  | 1.921102 | 1.226543 | 1.571666 | 2.038615 | 2.435296 | 1.664956 | 1.725078 | 0.828388 |
| gene-AT4C  | 0.2568   | 0.51108  | 0.445877 | 1.337025 | 1.661448 | 1.191381 | 0.17238  | 0.059855 |

|            |          |          |          |          |          |          |          |          |
|------------|----------|----------|----------|----------|----------|----------|----------|----------|
| gene-AT4C  | 1.191051 | 1.322229 | 1.325858 | 2.124734 | 1.648921 | 2.48926  | 3.261216 | 2.790122 |
| gene-AT1C  | 1.897353 | 3.188457 | 3.122309 | 3.045294 | 3.169861 | 2.303032 | 2.769943 | 3.53401  |
| gene-AT3C  | 174.6878 | 167.9361 | 179.8517 | 123.1226 | 119.3552 | 116.9809 | 291.9222 | 293.0027 |
| gene-AT5C  | 55.13709 | 54.95936 | 57.16    | 108.9524 | 104.3779 | 111.0023 | 19.13358 | 19.91111 |
| gene-AT3C  | 4.114578 | 3.662711 | 4.132322 | 3.390944 | 3.136289 | 3.1704   | 4.326391 | 4.723715 |
| gene-AT3C  | 2.89345  | 3.26603  | 2.899964 | 1.339775 | 0.992346 | 1.139576 | 2.017091 | 1.629544 |
| gene-AT4C  | 2.189402 | 2.507259 | 2.049868 | 4.378774 | 4.720031 | 4.841558 | 1.931401 | 1.957505 |
| gene-AT3C  | 1.074349 | 0.465591 | 0.695275 | 0.473819 | 0.418334 | 0.47951  | 0.96304  | 0.984277 |
| gene-AT2C  | 77.02967 | 78.22878 | 75.70632 | 61.43849 | 63.96554 | 63.30301 | 131.1599 | 137.0185 |
| gene-AT4C  | 5.216413 | 3.615348 | 3.65801  | 3.586802 | 3.898681 | 5.155    | 6.039288 | 7.590411 |
| gene-AT4C  | 12.31953 | 10.12316 | 9.976662 | 11.6841  | 13.38485 | 13.55694 | 24.63102 | 25.12672 |
| gene-AT5C  | 22.73282 | 25.34808 | 25.6788  | 23.11046 | 21.54909 | 23.29634 | 21.35305 | 19.98285 |
| gene-AT5C  | 13.75402 | 12.44454 | 15.93102 | 24.64952 | 25.40826 | 23.55946 | 8.999223 | 9.073301 |
| gene-AT5C  | 14.50867 | 14.88693 | 14.94908 | 10.10962 | 9.164517 | 10.24801 | 18.68955 | 20.79971 |
| gene-AT2C  | 4.837661 | 4.557983 | 5.508003 | 12.07309 | 11.24192 | 11.23123 | 6.010673 | 5.47384  |
| gene-AT2C  | 4.111349 | 3.875726 | 3.432061 | 5.04686  | 5.118379 | 5.688428 | 1.154679 | 1.060285 |
| gene-AT3C  | 2.042933 | 2.050103 | 1.661946 | 1.747376 | 2.375859 | 1.527354 | 0.40423  | 0.506712 |
| gene-AT5C  | 138.661  | 144.312  | 149.8236 | 56.30568 | 53.67587 | 55.28763 | 28.96476 | 26.78649 |
| gene-AT5C  | 7.147504 | 7.750426 | 7.802756 | 0.917055 | 1.205864 | 1.412679 | 1.089684 | 1.012582 |
| gene-AT1C  | 23.19131 | 25.06201 | 26.19595 | 16.65109 | 16.10848 | 17.15524 | 37.65914 | 41.74913 |
| gene-AT2C  | 94.48375 | 124.6479 | 87.06458 | 92.24963 | 97.22811 | 102.8199 | 101.2253 | 101.7531 |
| gene-AT1C  | 6.987202 | 7.437706 | 7.292103 | 6.143528 | 7.067044 | 7.791668 | 12.00113 | 13.03899 |
| gene-AT2C  | 46.58619 | 43.57323 | 45.46428 | 30.02108 | 29.54955 | 31.88652 | 61.15416 | 61.20419 |
| gene-AT5C  | 44.95731 | 42.83564 | 47.83394 | 8.449388 | 6.907037 | 6.568929 | 3.958322 | 4.186562 |
| gene-AT1C  | 2.915952 | 3.98783  | 2.486751 | 2.743675 | 2.205901 | 2.234533 | 7.063829 | 6.285383 |
| gene-AT1C  | 12.01353 | 12.82356 | 12.345   | 9.713017 | 10.08317 | 11.60658 | 24.46793 | 20.20756 |
| gene-AT5C  | 10.67571 | 9.87276  | 12.71259 | 5.971402 | 6.851669 | 6.762011 | 10.39427 | 8.956106 |
| gene-AT5C  | 2.058783 | 1.615985 | 3.071211 | 1.702757 | 0.986023 | 0.768442 | 4.549916 | 6.879199 |
| gene-AT2C  | 2.190733 | 1.815916 | 1.725017 | 2.874428 | 3.337172 | 3.534699 | 0.856097 | 0.96542  |
| gene-AT2C  | 1.52622  | 1.335385 | 1.615014 | 3.705823 | 4.627779 | 4.317557 | 1.170408 | 0.660978 |
| gene-AT3C  | 7.668114 | 7.735316 | 7.342511 | 7.552894 | 8.568252 | 8.012205 | 7.270152 | 8.726795 |
| gene-AT1C  | 7.505597 | 7.420679 | 6.751761 | 15.26582 | 14.72092 | 12.97455 | 5.901984 | 4.173655 |
| gene-AT1C  | 12.06986 | 13.71863 | 13.63307 | 15.70174 | 16.12423 | 17.39449 | 3.52681  | 3.580805 |
| gene-AT2C  | 8.515854 | 9.11835  | 8.310435 | 5.665496 | 5.677793 | 5.597783 | 19.21016 | 17.59665 |
| gene-AT4C  | 2.077381 | 2.095463 | 1.367151 | 4.363511 | 4.126173 | 3.725042 | 1.161392 | 1.018685 |
| gene-AT2C  | 0.875747 | 1.086278 | 1.319161 | 0.865222 | 1.33997  | 0.859598 | 0.024844 | 0.124682 |
| gene-AT3C  | 40.4584  | 43.0912  | 42.88383 | 40.72652 | 37.2985  | 39.08542 | 66.24384 | 65.9078  |
| gene-AT1C  | 1.649208 | 1.544771 | 0.961772 | 0.634537 | 0.639481 | 1.299435 | 3.69095  | 4.406342 |
| Arabidopsi | 17.24554 | 16.46942 | 17.48868 | 8.112123 | 5.77887  | 5.345823 | 1.679972 | 2.053205 |
| Arabidopsi | 1.04317  | 1.110432 | 0.827912 | 1.370049 | 2.121724 | 1.597653 | 0.824328 | 0.905736 |
| gene-AT5C  | 8.698817 | 9.958076 | 10.0849  | 7.896764 | 6.401077 | 6.476243 | 10.28657 | 10.38995 |
| gene-AT5C  | 22.29873 | 23.03408 | 21.29618 | 94.12387 | 95.48714 | 94.77661 | 33.45905 | 33.41677 |
| gene-AT5C  | 1.58061  | 2.594204 | 1.800985 | 2.26022  | 1.334455 | 1.46149  | 5.427491 | 5.089541 |
| gene-AT5C  | 19.07686 | 17.57172 | 17.32255 | 11.87683 | 10.2609  | 11.18932 | 23.18962 | 21.05417 |
| gene-AT4C  | 9.292048 | 9.877873 | 10.38579 | 10.4844  | 10.53821 | 9.504709 | 17.42019 | 18.91173 |
| gene-AT4C  | 5.915445 | 5.512424 | 5.976671 | 8.167348 | 6.723988 | 7.629892 | 2.555657 | 4.260873 |
| gene-AT1C  | 5.72641  | 5.873633 | 6.661624 | 6.06686  | 6.597674 | 6.880289 | 13.25376 | 13.27376 |
| gene-AT3C  | 9.699609 | 8.648563 | 10.74571 | 7.819396 | 7.373204 | 7.935382 | 14.85039 | 16.0756  |
| gene-AT4C  | 50.64656 | 49.83236 | 48.65452 | 93.93752 | 93.22335 | 96.57608 | 34.24318 | 38.15611 |
| gene-AT2C  | 27.82372 | 27.3233  | 27.29337 | 8.531984 | 8.355165 | 8.539281 | 9.548257 | 11.22531 |
| gene-AT5C  | 0.869799 | 0.402764 | 0.409699 | 0        | 0.686776 | 0.094021 | 2.948431 | 1.333342 |

|           |          |          |          |          |          |          |          |          |
|-----------|----------|----------|----------|----------|----------|----------|----------|----------|
| gene-AT1C | 5.970642 | 8.33915  | 6.428133 | 14.88136 | 16.8631  | 16.20073 | 3.181614 | 3.938327 |
| gene-AT5C | 0.265766 | 0.611021 | 0.374388 | 0.360883 | 0.442601 | 0.353133 | 0.648809 | 0.671592 |
| gene-AT1C | 2.487457 | 1.994304 | 2.429976 | 2.646907 | 2.732035 | 2.426577 | 0.848945 | 0.860989 |
| gene-AT4C | 31.48101 | 28.46883 | 31.48008 | 21.39533 | 21.58458 | 21.4658  | 26.0323  | 25.07395 |
| gene-AT1C | 0.753458 | 0.513698 | 1.162584 | 0.517981 | 0.620318 | 0.445329 | 0.04215  | 0.138957 |
| gene-AT3C | 9.927203 | 9.842209 | 9.941844 | 12.19605 | 11.9858  | 11.19016 | 13.29012 | 12.13423 |
| gene-AT5C | 196.8156 | 194.4619 | 198.3469 | 129.0633 | 136.1298 | 129.9863 | 170.8179 | 177.7472 |
| gene-AT1C | 2.281681 | 2.628056 | 1.965417 | 6.286345 | 6.738247 | 6.970734 | 5.324949 | 4.970157 |
| gene-AT2C | 0.943866 | 1.143285 | 1.462009 | 1.953166 | 0.909165 | 1.542346 | 0.708086 | 0.723044 |
| gene-AT2C | 2.825169 | 2.088844 | 1.875417 | 3.3007   | 2.973533 | 3.274255 | 0.694849 | 0.387179 |
| gene-AT1C | 77.13511 | 74.73267 | 77.82831 | 105.2224 | 108.6032 | 112.8918 | 54.63276 | 57.65365 |
| gene-AT1C | 5.811949 | 5.383951 | 4.778397 | 9.731098 | 7.188861 | 7.286946 | 7.194148 | 6.055879 |
| gene-AT5C | 64.01515 | 65.54528 | 62.77026 | 34.77458 | 33.31275 | 34.28282 | 65.90955 | 69.97843 |
| gene-AT5C | 1.428715 | 0.984532 | 1.048276 | 3.531047 | 2.821414 | 2.817177 | 6.415377 | 7.814683 |
| gene-AT1C | 31.9869  | 33.91223 | 34.06287 | 31.19422 | 30.15876 | 27.67034 | 51.01457 | 54.2889  |
| gene-AT4C | 38.33857 | 41.2853  | 42.70159 | 37.4698  | 38.77193 | 33.49293 | 67.99299 | 69.01185 |
| gene-AT1C | 0.56534  | 0.578362 | 0.390171 | 0.173505 | 0.21429  | 0.344001 | 0.384262 | 0.306635 |
| gene-AT2C | 0.275304 | 0.369779 | 0.223033 | 1.396645 | 0.993443 | 1.277891 | 0.098492 | 0.136594 |
| gene-AT1C | 7.618435 | 8.732951 | 8.388657 | 5.231153 | 6.324961 | 5.056572 | 8.86654  | 10.33243 |
| gene-AT5C | 451.0073 | 451.2991 | 458.6986 | 285.5111 | 277.2871 | 281.9393 | 613.2103 | 647.7404 |
| gene-AT3C | 10.20213 | 9.562501 | 9.659385 | 10.58286 | 10.03922 | 12.23693 | 7.467791 | 8.770999 |
| gene-AT1C | 1.275069 | 1.929769 | 1.45125  | 0.858296 | 0.866199 | 0.529899 | 1.728543 | 1.902681 |
| gene-AT1C | 36.57892 | 35.24646 | 37.39951 | 34.78267 | 33.92116 | 34.74567 | 51.62833 | 48.72593 |
| gene-AT2C | 2.864817 | 3.038371 | 3.31858  | 5.237278 | 4.880079 | 5.221967 | 2.459817 | 2.434708 |
| gene-AT5C | 5.223569 | 3.900252 | 3.950523 | 2.33601  | 1.993281 | 2.360161 | 4.283279 | 3.501172 |
| gene-AT1C | 11.11148 | 13.08436 | 13.23987 | 17.01037 | 14.82959 | 16.7557  | 4.743824 | 4.576411 |
| gene-AT4C | 41.43515 | 38.68109 | 39.63226 | 28.10638 | 26.50032 | 26.84332 | 59.26531 | 57.7798  |
| gene-AT3C | 99.86804 | 105.1643 | 101.3688 | 281.538  | 232.9878 | 274.6467 | 63.76961 | 57.14497 |
| gene-AT2C | 10.34126 | 9.530232 | 10.97876 | 9.575905 | 7.186735 | 8.152546 | 9.984254 | 10.84292 |
| gene-AT5C | 17.18928 | 18.32583 | 18.97772 | 13.80332 | 14.27116 | 15.17149 | 34.9812  | 38.15162 |
| gene-AT3C | 14.24382 | 16.06049 | 16.04471 | 17.07196 | 16.39348 | 13.01406 | 22.72333 | 18.73224 |
| gene-AT3C | 114.2924 | 118.0365 | 113.0493 | 87.81852 | 81.8695  | 84.32192 | 125.0224 | 117.7889 |
| gene-AT2C | 0.022904 | 0.041234 | 0.063383 | 0.299986 | 0.226468 | 0.29185  | 0        | 0.221963 |
| gene-AT4C | 8.830993 | 8.296761 | 8.633078 | 6.790629 | 3.710932 | 4.595032 | 14.10516 | 15.13119 |
| gene-AT2C | 4.695482 | 3.910567 | 4.476471 | 13.71187 | 12.53359 | 12.12585 | 1.260545 | 1.587683 |
| gene-AT5C | 0.544134 | 0.707674 | 0.884806 | 0.70649  | 0.582839 | 0.867876 | 0.542558 | 0.421438 |
| gene-AT4C | 5.765325 | 6.852989 | 6.700244 | 8.801196 | 8.388064 | 9.109639 | 4.87727  | 5.064554 |
| gene-AT5C | 6.760343 | 6.395603 | 6.187629 | 0.9611   | 1.367668 | 1.313212 | 18.07063 | 19.32884 |
| gene-AT5C | 5.149451 | 4.297764 | 4.331788 | 3.075887 | 4.824012 | 5.149477 | 4.625639 | 4.879774 |
| gene-AT1C | 30.60046 | 29.67527 | 29.99824 | 29.48485 | 30.995   | 31.43038 | 18.28162 | 17.20983 |
| gene-AT5C | 1.516733 | 0.756233 | 0.53128  | 2.048631 | 1.364434 | 2.667887 | 1.521318 | 1.722537 |
| gene-AT2C | 80.29645 | 79.96716 | 86.56223 | 74.63227 | 76.64893 | 75.96123 | 125.3343 | 134.0232 |
| gene-AT2C | 6.137022 | 6.380472 | 5.560254 | 5.132921 | 4.815961 | 5.794515 | 2.495121 | 2.508185 |
| gene-AT4C | 1.640343 | 1.510405 | 1.158122 | 2.776316 | 1.906009 | 2.390849 | 1.17831  | 0.713332 |
| gene-AT1C | 10.52441 | 10.05949 | 9.007548 | 11.27247 | 10.0287  | 11.54828 | 5.67474  | 7.211028 |
| gene-AT1C | 4.256911 | 4.427154 | 4.125682 | 3.054024 | 3.051046 | 2.970277 | 5.160795 | 5.559144 |
| gene-AT3C | 5.995958 | 4.743521 | 6.228545 | 5.15544  | 5.651539 | 4.735348 | 1.193943 | 1.083483 |
| gene-AT5C | 3.097562 | 4.382395 | 3.016436 | 3.806798 | 4.062201 | 2.953017 | 4.565041 | 7.376395 |
| gene-AT5C | 8.314915 | 9.532602 | 8.432015 | 5.66048  | 6.876508 | 5.759002 | 11.04549 | 12.87825 |
| gene-AT3C | 26.32537 | 31.77578 | 24.75272 | 5.676834 | 8.021722 | 7.288911 | 42.83503 | 42.8588  |
| gene-AT5C | 14.04541 | 12.54288 | 12.85841 | 7.197797 | 6.904353 | 6.265214 | 4.492947 | 5.454981 |

|           |          |          |          |          |          |          |          |          |
|-----------|----------|----------|----------|----------|----------|----------|----------|----------|
| gene-AT1C | 1.986207 | 1.003786 | 1.302115 | 3.17148  | 2.695388 | 2.888534 | 1.316369 | 1.257332 |
| gene-AT4C | 6.390562 | 6.353763 | 6.009759 | 14.41443 | 13.60001 | 13.92022 | 6.114338 | 5.326625 |
| gene-AT5C | 20.6123  | 16.45738 | 16.6985  | 15.9636  | 20.43881 | 17.43692 | 21.36589 | 21.15862 |
| gene-AT1C | 83.4789  | 84.21875 | 88.04277 | 96.64459 | 100.1846 | 92.69368 | 38.4143  | 39.23362 |
| gene-AT4C | 685.7204 | 828.3209 | 848.6484 | 1167.986 | 1132.918 | 1109.469 | 212.8087 | 230.9399 |
| gene-AT3C | 4.727683 | 4.565224 | 4.630372 | 2.873881 | 2.800003 | 2.898063 | 3.838522 | 4.816231 |
| gene-AT2C | 83.02883 | 79.02368 | 86.29758 | 47.00493 | 46.79763 | 42.03883 | 103.0196 | 104.8013 |
| gene-AT4C | 0.665527 | 0.592108 | 0.587253 | 3.980204 | 4.020837 | 5.022708 | 1.971561 | 2.707599 |
| gene-AT2C | 27.78399 | 26.66562 | 28.23023 | 27.7646  | 27.34316 | 27.71073 | 11.27765 | 11.7362  |
| gene-AT5C | 56.85969 | 55.37903 | 55.55984 | 96.31766 | 96.46556 | 93.19553 | 25.0982  | 28.542   |
| gene-AT1C | 2.379433 | 2.217482 | 2.550779 | 8.208716 | 8.578666 | 6.744947 | 2.493633 | 2.503647 |
| gene-AT4C | 150.2917 | 149.809  | 150.6683 | 102.2598 | 106.7221 | 100.5645 | 121.4567 | 127.1402 |
| gene-AT4C | 1.287942 | 0.417512 | 0.447148 | 0.298798 | 0.470626 | 0.197858 | 0.375832 | 0.14868  |
| gene-AT1C | 118.9095 | 123.2367 | 114.8082 | 55.63442 | 53.36263 | 55.23463 | 54.31784 | 53.71267 |
| gene-AT4C | 4.585987 | 4.664796 | 5.187714 | 5.407037 | 4.200613 | 5.127885 | 0.629527 | 0.639999 |
| gene-AT3C | 6.079716 | 5.423214 | 5.240958 | 8.231764 | 8.669246 | 7.656477 | 7.20874  | 7.336917 |
| gene-AT1C | 78.89407 | 75.40992 | 81.45259 | 58.72549 | 56.93644 | 55.24713 | 108.3494 | 107.1116 |
| gene-AT3C | 7.870968 | 8.547948 | 8.942986 | 69.1558  | 67.84252 | 67.65563 | 13.63599 | 13.83702 |
| gene-AT3C | 1.911241 | 1.116098 | 1.764014 | 0.934156 | 0.657952 | 0.804393 | 1.442751 | 1.472847 |
| gene-AT2C | 0.617976 | 0.973758 | 1.046004 | 0.295146 | 0.18205  | 0.377831 | 0.147595 | 0.567368 |
| gene-AT2C | 1.113064 | 0.797885 | 1.132051 | 1.123147 | 1.041512 | 0.923465 | 1.362952 | 1.769747 |
| gene-AT1C | 11.21443 | 11.83751 | 10.78316 | 22.5733  | 20.91351 | 24.05141 | 12.87472 | 12.94121 |
| gene-AT3C | 0.940403 | 0.557283 | 0.850362 | 1.208991 | 1.930106 | 0.863773 | 1.069505 | 0.429313 |
| gene-AT5C | 87.58336 | 88.05029 | 84.46169 | 67.08877 | 66.50412 | 66.6371  | 129.7883 | 132.3804 |
| gene-AT5C | 8.686852 | 8.275704 | 7.826109 | 11.60699 | 12.577   | 11.25787 | 4.225445 | 3.252002 |
| gene-AT1C | 16.30213 | 15.86315 | 15.7212  | 7.476542 | 7.11709  | 6.336966 | 7.978549 | 8.495809 |
| gene-AT4C | 0.875578 | 1.891117 | 1.681792 | 1.51364  | 1.327306 | 1.032161 | 1.354758 | 1.819331 |
| gene-AT3C | 44.97355 | 44.9643  | 44.13492 | 51.15878 | 52.79062 | 49.95669 | 12.75084 | 12.7284  |
| gene-AT1C | 4.184945 | 4.160312 | 4.55048  | 3.883629 | 2.434466 | 3.442037 | 1.231589 | 1.422582 |
| gene-AT3C | 5.467465 | 5.670117 | 5.812169 | 7.562107 | 5.285794 | 4.834544 | 6.234491 | 7.923234 |
| gene-AT5C | 13.01707 | 11.66264 | 13.36544 | 5.078324 | 3.424859 | 5.534971 | 11.45257 | 11.03196 |
| gene-AT4C | 7.915805 | 9.973156 | 8.698552 | 1.044897 | 2.435972 | 2.683901 | 3.338237 | 2.934289 |
| gene-AT3C | 11.50201 | 10.84061 | 11.93733 | 7.310994 | 6.984053 | 7.23642  | 16.84678 | 17.7957  |
| gene-AT4C | 13.51958 | 14.69049 | 9.909803 | 10.6693  | 10.22271 | 9.713915 | 16.2069  | 17.48206 |
| gene-AT1C | 21.33312 | 20.21263 | 20.16043 | 20.75066 | 19.78425 | 18.4866  | 6.296334 | 6.712722 |
| gene-AT4C | 7.070983 | 6.603382 | 5.693796 | 2.037422 | 2.62619  | 1.907404 | 17.45156 | 14.59112 |
| gene-AT4C | 0.151271 | 0.215618 | 0.241806 | 0.704793 | 0.493409 | 0.548897 | 0.163084 | 0.076595 |
| gene-AT1C | 5.41187  | 6.289166 | 5.755556 | 23.40027 | 22.31404 | 23.15114 | 2.683705 | 2.539006 |
| gene-AT1C | 7.043679 | 6.822245 | 8.378518 | 17.32839 | 16.60626 | 15.1039  | 6.37733  | 6.629183 |
| gene-AT3C | 2.062351 | 1.784169 | 1.452352 | 2.84932  | 2.39871  | 2.1505   | 0.76333  | 0.918998 |
| gene-AT5C | 1.111504 | 2.299275 | 2.515895 | 1.313665 | 0.777952 | 1.208068 | 4.179986 | 4.564748 |
| gene-AT4C | 0.89781  | 1.097577 | 0.786105 | 4.016378 | 3.75729  | 4.257503 | 0.133396 | 0.046817 |
| gene-AT3C | 2.996623 | 2.308069 | 2.093615 | 3.325975 | 2.029403 | 2.530168 | 3.718609 | 4.268057 |
| gene-AT2C | 6.1967   | 5.606705 | 5.2456   | 8.11764  | 6.320878 | 5.806992 | 5.608886 | 5.90767  |
| gene-AT3C | 1.296159 | 0.894758 | 1.502266 | 1.645687 | 1.833235 | 2.39706  | 0.785013 | 0.959656 |
| gene-AT3C | 1.926415 | 2.158597 | 1.881341 | 3.465208 | 4.345293 | 4.12036  | 1.182947 | 1.319116 |
| gene-AT2C | 28.84888 | 34.39649 | 29.177   | 8.731274 | 8.925735 | 9.48994  | 1.458855 | 1.136528 |
| gene-AT1C | 27.21524 | 24.7592  | 25.80825 | 29.80435 | 31.10265 | 32.8282  | 19.85185 | 21.85673 |
| gene-AT5C | 8.681129 | 6.704908 | 7.673577 | 9.458743 | 12.22496 | 10.05617 | 11.53613 | 13.21646 |
| gene-AT1C | 11.13626 | 12.67565 | 11.32509 | 12.18655 | 12.25977 | 12.59659 | 22.27103 | 21.36789 |
| gene-AT4C | 4.82385  | 4.352551 | 4.458405 | 2.631    | 1.814051 | 1.763348 | 15.57732 | 16.52769 |

|           |          |          |          |          |          |          |          |          |
|-----------|----------|----------|----------|----------|----------|----------|----------|----------|
| gene-AT1C | 1.047271 | 0.644343 | 1.005816 | 1.616965 | 1.650898 | 1.660785 | 1.662042 | 1.535506 |
| gene-AT4C | 1.273199 | 1.138333 | 1.200957 | 3.999157 | 4.466753 | 3.794039 | 0.579186 | 0.388225 |
| gene-AT1C | 4.094305 | 3.42017  | 2.784681 | 2.715283 | 3.390206 | 2.706867 | 1.496868 | 1.008656 |
| gene-AT1C | 0.642067 | 0.641473 | 0.522785 | 0.936538 | 0.802027 | 0.813172 | 0.545098 | 0.61934  |
| gene-AT4C | 2.537985 | 2.783786 | 2.393747 | 5.004649 | 5.466257 | 6.775708 | 2.027735 | 4.52304  |
| gene-AT1C | 47.05896 | 48.30904 | 44.5452  | 39.86893 | 38.43887 | 38.988   | 88.47121 | 86.79497 |
| gene-AT2C | 0.315313 | 0.488523 | 0        | 0.154476 | 0.260663 | 0.177609 | 1.099122 | 1.111462 |
| gene-AT2C | 31.36671 | 32.16028 | 30.32848 | 16.93429 | 16.47948 | 16.00057 | 27.84828 | 29.88009 |
| gene-AT3C | 4.99724  | 7.381954 | 6.466906 | 17.56762 | 16.39071 | 17.68341 | 5.96928  | 5.164434 |
| gene-AT1C | 9.582853 | 8.748818 | 10.7523  | 3.110251 | 4.061276 | 3.537549 | 3.160281 | 3.421611 |
| gene-AT5C | 54.87648 | 56.68634 | 54.22635 | 161.3423 | 155.1803 | 160.0051 | 44.72705 | 48.28165 |
| gene-AT4C | 0        | 0        | 0        | 0.569572 | 0.143751 | 0.218303 | 0.328556 | 0.168388 |
| gene-AT5C | 2.048185 | 2.432009 | 2.77494  | 2.221235 | 2.236392 | 2.798826 | 1.090266 | 1.14233  |
| gene-AT2C | 1.746852 | 1.694022 | 1.979682 | 2.824111 | 2.911877 | 3.253115 | 1.830071 | 1.363693 |
| gene-AT1C | 13.65051 | 13.09245 | 13.90158 | 7.999105 | 7.46485  | 8.409956 | 5.401294 | 5.583907 |
| gene-AT3C | 24.83309 | 23.18369 | 24.19968 | 42.45927 | 43.74346 | 42.73673 | 3.670563 | 2.528572 |
| gene-AT2C | 28.88804 | 28.4649  | 35.7903  | 27.73108 | 24.77494 | 24.3561  | 40.04164 | 42.3811  |
| gene-AT2C | 606.3157 | 624.4196 | 623.4678 | 414.6562 | 400.0491 | 416.9147 | 705.0584 | 707.2297 |
| gene-AT1C | 10.41332 | 10.41098 | 10.43853 | 9.17343  | 7.85617  | 7.331335 | 6.781236 | 5.864751 |
| gene-AT1C | 5.388795 | 6.550874 | 5.633239 | 6.746622 | 6.741362 | 7.014853 | 0.195384 | 0.29352  |
| gene-AT2C | 4.504639 | 4.279534 | 4.962198 | 12.61572 | 11.45542 | 13.718   | 2.990765 | 3.325043 |
| gene-AT2C | 19.09578 | 17.73263 | 17.97481 | 3.951711 | 4.813037 | 4.962785 | 1.232712 | 2.000117 |
| gene-AT1C | 2.067672 | 2.228882 | 2.696003 | 2.461142 | 2.286518 | 2.190391 | 1.95496  | 1.685851 |
| gene-AT3C | 211.4514 | 207.3948 | 218.74   | 117.9744 | 123.0638 | 118.9231 | 308.3683 | 305.9426 |
| gene-AT5C | 5.47516  | 5.929694 | 4.486929 | 9.306024 | 11.00984 | 8.6896   | 1.778313 | 2.11782  |
| gene-AT5C | 2.634395 | 3.19553  | 2.041675 | 9.564481 | 8.412908 | 11.79364 | 0.92536  | 1.081646 |
| gene-AT3C | 9.143353 | 7.905287 | 9.79412  | 8.427928 | 7.548904 | 6.290943 | 9.566323 | 12.27962 |
| gene-AT5C | 3.458726 | 3.689056 | 3.379986 | 3.961268 | 3.135869 | 4.174383 | 1.164036 | 1.188317 |
| gene-AT5C | 5.565634 | 5.456297 | 5.391998 | 6.965331 | 7.443648 | 7.386109 | 1.563181 | 1.811639 |
| gene-AT5C | 25.4569  | 25.78411 | 24.83529 | 13.20384 | 13.08952 | 12.55314 | 24.09843 | 25.41754 |
| gene-AT5C | 5.298836 | 4.122728 | 5.864056 | 2.17676  | 1.859219 | 1.860354 | 1.602685 | 1.215745 |
| gene-AT2C | 3.689724 | 3.936814 | 4.3215   | 1.840817 | 2.230853 | 1.861171 | 9.545164 | 8.589792 |
| gene-AT1C | 19.19241 | 19.53024 | 18.98024 | 15.15498 | 15.94248 | 15.26163 | 8.34158  | 8.547825 |
| gene-AT3C | 58.35242 | 58.19831 | 59.14277 | 41.10254 | 44.2858  | 43.90068 | 92.81669 | 94.49561 |
| gene-AT5C | 2.089431 | 1.88193  | 2.44231  | 0.545601 | 0.472481 | 0.707259 | 0.47882  | 0.242308 |
| gene-AT5C | 0.452385 | 0.517389 | 0.590446 | 0.364139 | 0.403762 | 0.259946 | 0.157739 | 0.066414 |
| gene-AT1C | 3.980483 | 4.303843 | 4.795775 | 2.855692 | 3.065114 | 2.253589 | 5.414568 | 4.984304 |
| gene-AT5C | 2.537724 | 1.640375 | 1.628632 | 1.590229 | 1.846329 | 1.478614 | 2.583741 | 2.443338 |
| gene-AT4C | 7.887334 | 10.8783  | 7.166998 | 5.67816  | 4.055757 | 3.706104 | 10.68234 | 13.08948 |
| gene-AT4C | 4.916228 | 5.135337 | 3.998281 | 6.19943  | 6.865691 | 6.868447 | 3.110872 | 2.306367 |
| gene-AT4C | 9.246504 | 9.491374 | 8.261786 | 13.61538 | 14.22619 | 12.3798  | 6.945885 | 6.595868 |
| gene-AT1C | 41.93664 | 43.64871 | 43.2852  | 34.32613 | 34.16756 | 33.09825 | 23.83197 | 21.23885 |
| gene-AT2C | 14.50398 | 17.0385  | 15.6361  | 5.00613  | 4.515672 | 5.54407  | 7.913252 | 8.159175 |
| gene-AT1C | 5.5654   | 5.317113 | 5.891223 | 4.440795 | 4.478766 | 3.992476 | 2.448938 | 2.727639 |
| gene-AT1C | 9.924378 | 9.56974  | 9.717444 | 20.79418 | 26.58384 | 21.11657 | 3.277142 | 2.936569 |
| gene-AT3C | 14.5678  | 14.83361 | 14.52325 | 20.70235 | 19.91884 | 18.93872 | 10.11207 | 9.731744 |
| gene-AT1C | 0.693136 | 0.9648   | 0.822096 | 0.485756 | 0.608259 | 0.804102 | 0.242036 | 0.23181  |
| gene-AT4C | 24.08028 | 21.75827 | 22.92919 | 1.456785 | 0.735308 | 1.164917 | 7.530301 | 7.870212 |
| gene-AT5C | 11.46463 | 10.99959 | 11.16128 | 13.46133 | 14.18293 | 13.77964 | 3.018959 | 2.941255 |
| gene-AT3C | 2.101914 | 1.143379 | 1.204409 | 0.123816 | 0.302945 | 0.198333 | 0.260373 | 0.268728 |
| gene-AT1C | 0.403811 | 0.423321 | 0.406138 | 1.083853 | 1.134795 | 0.765421 | 0.254397 | 0.206917 |



|           |          |          |          |          |          |          |          |          |
|-----------|----------|----------|----------|----------|----------|----------|----------|----------|
| gene-AT3C | 22.41077 | 22.12371 | 21.47395 | 19.00658 | 18.28767 | 18.606   | 45.57571 | 48.84157 |
| gene-AT1C | 0.997031 | 1.053504 | 1.089256 | 0.367604 | 0.352676 | 0.604043 | 2.391669 | 2.548141 |
| gene-AT4C | 4.471145 | 6.067185 | 5.856206 | 75.64537 | 77.97397 | 75.80382 | 0.499228 | 0.776036 |
| gene-AT5C | 2.540148 | 2.867023 | 2.813338 | 6.137823 | 5.421689 | 5.500127 | 2.535728 | 3.073421 |
| gene-AT3C | 15.14432 | 16.6395  | 15.94923 | 13.45898 | 14.32513 | 12.25088 | 1.970025 | 1.379066 |
| gene-AT3C | 6.43795  | 7.440542 | 4.667003 | 6.143862 | 7.102166 | 7.459996 | 2.8756   | 2.77919  |
| gene-AT4C | 3.279742 | 3.278146 | 3.258607 | 2.018742 | 1.496503 | 1.525608 | 9.483578 | 10.88351 |
| gene-AT3C | 1.891577 | 2.117975 | 1.927312 | 1.736201 | 1.894287 | 2.010674 | 0.739675 | 0.408771 |
| gene-AT2C | 0.870101 | 0.592115 | 0.889552 | 3.576362 | 4.458937 | 3.425652 | 1.583874 | 1.122432 |
| gene-AT3C | 0.693039 | 0.947939 | 1.169016 | 0.194522 | 0.238924 | 0.589249 | 0.416951 | 0.322916 |
| gene-AT3C | 3.045535 | 3.507913 | 3.667198 | 5.141983 | 5.187526 | 5.68671  | 0.288846 | 0.247977 |
| gene-AT1C | 1.945904 | 1.708723 | 1.305314 | 4.126671 | 3.92182  | 3.683833 | 1.704052 | 1.51723  |
| gene-AT3C | 4.768314 | 4.064407 | 4.830315 | 4.161464 | 3.032012 | 3.825344 | 5.765775 | 5.110196 |
| gene-AT5C | 1.536916 | 1.489585 | 1.67134  | 2.057784 | 2.098704 | 2.752154 | 0.838198 | 0.709421 |
| gene-AT4C | 2.302272 | 3.488596 | 3.958975 | 1.97753  | 1.51223  | 2.278442 | 2.553607 | 1.986633 |
| gene-AT5C | 11.79523 | 12.55266 | 12.5827  | 17.76849 | 19.87269 | 19.47951 | 4.85381  | 4.364226 |
| gene-AT4C | 19.86213 | 19.51591 | 19.89717 | 18.34013 | 18.07857 | 18.00775 | 10.40186 | 10.26523 |
| gene-AT1C | 20.22412 | 18.11403 | 20.15676 | 38.93092 | 39.26868 | 40.67577 | 10.95175 | 10.6351  |
| gene-AT1C | 10.44531 | 8.959176 | 9.724263 | 6.000513 | 5.651363 | 6.05514  | 3.070931 | 3.444926 |
| gene-AT4C | 73.58617 | 75.06811 | 81.9025  | 47.43388 | 46.32304 | 46.05757 | 103.985  | 100.5352 |
| gene-AT5C | 11.97502 | 12.3541  | 10.73593 | 9.237912 | 8.250115 | 8.64625  | 2.768502 | 2.326168 |
| gene-AT3C | 1.538103 | 1.776522 | 1.852152 | 1.358967 | 1.276582 | 1.331225 | 1.551321 | 2.43151  |
| gene-AT1C | 307.7671 | 301.3765 | 303.5551 | 186.0346 | 192.5416 | 195.1127 | 304.5864 | 321.7896 |
| gene-AT1C | 25.29468 | 24.26692 | 24.89401 | 42.76046 | 43.17371 | 42.74357 | 20.00435 | 23.2993  |
| gene-AT2C | 18.17192 | 16.47364 | 16.98552 | 17.86559 | 15.99366 | 17.5084  | 7.18874  | 6.717691 |
| gene-AT5C | 1.610361 | 0.833826 | 1.389481 | 3.208079 | 2.786225 | 2.654105 | 2.758735 | 2.489919 |
| gene-AT5C | 9.542905 | 8.903517 | 9.350346 | 10.6134  | 9.605449 | 10.09568 | 5.854884 | 6.556576 |
| gene-AT1C | 2.631526 | 3.206234 | 2.186066 | 7.634333 | 6.926731 | 6.318291 | 4.214902 | 5.025376 |
| gene-AT1C | 3.051038 | 2.782934 | 3.201448 | 10.57065 | 10.37255 | 10.80775 | 0.651557 | 0.329776 |
| gene-AT2C | 22.30599 | 26.37911 | 26.62682 | 19.93675 | 18.81558 | 22.01522 | 2.131234 | 1.675709 |
| gene-AT1C | 8.979109 | 9.991382 | 9.473454 | 7.410184 | 7.038472 | 8.160261 | 4.035533 | 4.885821 |
| gene-AT5C | 41.36695 | 42.88378 | 44.52168 | 37.67144 | 37.29126 | 36.94763 | 47.21835 | 48.71236 |
| gene-AT4C | 0.229386 | 0.23819  | 0.132242 | 1.925082 | 1.338629 | 2.109156 | 0.199085 | 0.094018 |
| gene-AT4C | 34.52093 | 32.63948 | 32.37368 | 85.93707 | 87.67185 | 81.81699 | 29.81205 | 30.50719 |
| gene-AT2C | 88.35038 | 87.16287 | 86.15348 | 46.88477 | 48.74141 | 48.99008 | 141.7765 | 147.5929 |
| gene-AT1C | 19.53296 | 21.85892 | 18.33627 | 17.1804  | 16.6208  | 16.32996 | 22.66706 | 25.8341  |
| gene-AT3C | 17.10659 | 16.07901 | 16.60613 | 8.377954 | 9.385268 | 8.285219 | 26.03922 | 26.2727  |
| gene-AT1C | 12.52083 | 12.47369 | 12.20823 | 11.76417 | 10.98457 | 12.82239 | 7.068053 | 7.086267 |
| gene-AT3C | 1.338036 | 2.176766 | 1.605444 | 3.157027 | 2.230976 | 2.061283 | 0.256094 | 0.337898 |
| gene-AT2C | 2.394168 | 2.158183 | 2.579421 | 0.916328 | 1.352813 | 1.198166 | 2.226896 | 2.852898 |
| gene-AT1C | 0.282688 | 0.269864 | 0.19132  | 0.505716 | 0.340329 | 0.609506 | 0.168161 | 0.165113 |
| gene-AT2C | 0.300126 | 0.193596 | 0.139904 | 0.784411 | 0.376088 | 0.250893 | 0.371959 | 0.540194 |
| gene-AT5C | 115.3395 | 110.0907 | 117.4509 | 128.9634 | 128.168  | 124.6088 | 59.42902 | 62.2581  |
| gene-AT1C | 25.91527 | 23.80421 | 27.02389 | 37.89845 | 40.25607 | 41.90172 | 8.185375 | 6.23809  |
| gene-AT4C | 2.168662 | 1.36982  | 2.250612 | 0.087056 | 0.292796 | 0.140675 | 3.214536 | 4.404974 |
| gene-AT1C | 9.815753 | 9.568322 | 10.28834 | 51.91375 | 54.38612 | 50.16687 | 7.986082 | 9.155184 |
| gene-AT5C | 2.576433 | 4.103028 | 3.099971 | 2.78012  | 3.194594 | 3.498747 | 1.321832 | 0.568592 |
| gene-AT1C | 53.14431 | 51.34826 | 55.94223 | 80.06463 | 78.55464 | 81.07629 | 16.88782 | 14.89375 |
| gene-AT1C | 32.67955 | 33.05302 | 32.51493 | 22.82365 | 22.18367 | 21.15573 | 13.16937 | 13.60507 |
| gene-AT5C | 0.502004 | 0.259377 | 0.450603 | 2.137267 | 2.410576 | 2.309908 | 0.18149  | 0.140454 |
| gene-AT3C | 1.549309 | 1.579536 | 2.717658 | 0.354713 | 0.405299 | 0.336774 | 1.906185 | 1.939014 |

|           |          |          |          |          |          |          |          |          |
|-----------|----------|----------|----------|----------|----------|----------|----------|----------|
| gene-AT3C | 88.27309 | 87.8097  | 94.64634 | 182.0564 | 184.1241 | 176.8323 | 125.0323 | 134.2802 |
| gene-AT4C | 2.214092 | 1.785897 | 2.052672 | 2.626269 | 2.655918 | 2.591779 | 2.815459 | 2.741357 |
| gene-AT1C | 21.10712 | 22.07855 | 22.08746 | 12.98125 | 14.14075 | 15.7864  | 4.186173 | 4.130345 |
| gene-AT4C | 1.410797 | 1.896716 | 2.103931 | 1.736214 | 2.19111  | 1.756057 | 3.765057 | 3.997691 |
| gene-AT4C | 3.354602 | 2.386545 | 3.126318 | 1.887745 | 1.795607 | 1.738632 | 0.542273 | 0.683013 |
| gene-AT4C | 3.512589 | 3.139295 | 3.807026 | 2.434434 | 2.056872 | 2.34379  | 11.34762 | 8.070878 |
| gene-AT2C | 4.486285 | 4.193516 | 4.825664 | 2.99126  | 2.727397 | 2.848559 | 7.481285 | 8.1647   |
| gene-AT1C | 0.370312 | 0.375146 | 0.28253  | 2.732824 | 2.75939  | 2.907631 | 0.112438 | 0.077912 |
| gene-AT3C | 59.18083 | 62.49655 | 60.91598 | 160.7409 | 155.0621 | 153.596  | 19.55553 | 20.62196 |
| gene-AT1C | 3.119463 | 2.31839  | 3.060281 | 1.936818 | 3.151166 | 3.827552 | 0.63428  | 0.565429 |
| gene-AT3C | 2.538335 | 2.246317 | 2.314303 | 1.793554 | 2.728482 | 1.832113 | 3.737349 | 3.931722 |
| gene-AT1C | 1.751259 | 1.745509 | 1.346569 | 31.12954 | 33.16046 | 33.77759 | 2.632797 | 2.418012 |
| gene-AT2C | 3.198945 | 3.144655 | 3.557896 | 4.532994 | 5.197729 | 5.388395 | 5.108987 | 4.904132 |
| gene-AT4C | 4.090202 | 4.257478 | 3.92391  | 3.803481 | 4.849055 | 4.879878 | 12.68409 | 14.1806  |
| gene-AT1C | 1.882643 | 3.15893  | 2.177191 | 3.787316 | 2.564493 | 2.894004 | 1.290694 | 1.202896 |
| gene-AT4C | 8.349307 | 8.085223 | 7.979705 | 4.160504 | 4.258081 | 4.831117 | 9.157098 | 9.840053 |
| gene-AT4C | 18.45645 | 20.90808 | 22.68794 | 40.32805 | 37.19291 | 41.81291 | 37.68416 | 38.44519 |
| gene-AT5C | 48.78189 | 53.04922 | 52.37593 | 40.34816 | 39.20494 | 39.80388 | 73.34827 | 79.2228  |
| gene-AT5C | 57.04583 | 59.45328 | 56.64206 | 9.511394 | 9.873662 | 9.589201 | 52.44039 | 53.40701 |
| gene-AT5C | 5.762981 | 6.621428 | 6.514755 | 9.433785 | 9.633716 | 9.462988 | 5.61304  | 5.729229 |
| gene-AT1C | 172.958  | 177.949  | 179.1854 | 225.7886 | 227.7384 | 211.9069 | 77.91079 | 78.73621 |
| gene-AT3C | 15.452   | 14.07415 | 13.74178 | 10.18153 | 11.19692 | 10.86394 | 8.623512 | 8.204519 |
| gene-AT3C | 70.87007 | 66.13186 | 67.74613 | 32.12917 | 29.55731 | 29.50722 | 67.11335 | 67.03948 |
| gene-AT1C | 34.16192 | 29.89641 | 31.42928 | 5.108904 | 6.268194 | 5.490467 | 13.11397 | 13.50496 |
| gene-AT2C | 1.376249 | 1.556695 | 0.759536 | 2.448583 | 2.813958 | 2.204492 | 1.094357 | 0.734688 |
| gene-AT4C | 3.425348 | 3.440747 | 4.064689 | 5.228843 | 6.739666 | 5.625186 | 1.416156 | 1.101678 |
| gene-AT4C | 180.2184 | 174.0484 | 177.9958 | 316.4685 | 316.8231 | 308.8623 | 71.48381 | 72.27723 |
| gene-AT4C | 52.85554 | 52.63859 | 48.59414 | 102.0555 | 104.4726 | 102.5404 | 8.748495 | 7.550005 |
| gene-AT4C | 19.81462 | 21.44668 | 21.43373 | 13.66677 | 12.40301 | 12.44491 | 33.7838  | 29.96688 |
| gene-AT4C | 19.04598 | 16.03108 | 18.38324 | 70.46896 | 67.0708  | 70.36822 | 4.641106 | 5.006023 |
| gene-AT1C | 148.9786 | 144.2223 | 146.981  | 71.83268 | 71.5284  | 71.29619 | 71.11787 | 78.91796 |
| gene-AT1C | 3.75393  | 4.180713 | 4.057785 | 1.217924 | 1.032082 | 1.622108 | 12.08733 | 10.92862 |
| gene-AT5C | 43.64361 | 44.20835 | 40.94102 | 33.14653 | 34.31546 | 33.34547 | 13.55501 | 14.69458 |
| gene-AT3C | 14.97371 | 15.46061 | 15.21164 | 6.373954 | 7.416121 | 6.035204 | 5.049505 | 4.850725 |
| gene-AT4C | 31.66247 | 29.41517 | 31.3159  | 38.24654 | 38.46088 | 36.44822 | 54.85716 | 58.05124 |
| gene-AT5C | 13.54975 | 16.30685 | 16.3064  | 70.27564 | 72.80904 | 69.56139 | 5.319293 | 5.424184 |
| gene-AT3C | 0.291196 | 0.334478 | 0.236616 | 1.603295 | 1.431372 | 1.620846 | 0.094409 | 0.049524 |
| gene-AT3C | 3.104207 | 2.347606 | 3.033759 | 1.408332 | 1.423154 | 1.424016 | 5.113554 | 4.004742 |
| gene-AT5C | 53.14988 | 53.81491 | 53.00829 | 76.7955  | 78.34844 | 79.55985 | 26.66785 | 26.11474 |
| gene-AT5C | 0.871346 | 0.705004 | 1.706052 | 1.198314 | 0.756928 | 0.905431 | 1.96855  | 1.920569 |
| gene-AT4C | 15.71542 | 14.07796 | 16.00926 | 4.117281 | 4.954665 | 5.241156 | 30.68857 | 32.18568 |
| gene-AT2C | 87.7051  | 91.60822 | 83.86542 | 55.64203 | 60.43066 | 55.66222 | 163.5229 | 155.1709 |
| gene-AT2C | 2.725338 | 1.345981 | 2.382014 | 1.003724 | 1.679446 | 1.123989 | 0.369468 | 0.66421  |
| gene-AT3C | 0.178265 | 0.175774 | 0.145996 | 0.236001 | 0.177717 | 0.30195  | 0.067467 | 0.148404 |
| gene-AT1C | 0.584466 | 0.680387 | 0.793342 | 0.255707 | 0.275495 | 0.402657 | 0.150438 | 0.09041  |
| gene-AT2C | 3.269484 | 3.724765 | 3.539801 | 4.89081  | 4.870015 | 4.48645  | 6.076613 | 6.874629 |
| gene-AT1C | 12.88825 | 13.03423 | 13.08224 | 15.92076 | 15.57572 | 15.78643 | 4.353055 | 3.843018 |
| gene-AT1C | 5.559321 | 5.997516 | 4.89963  | 4.485538 | 4.52736  | 4.709357 | 5.528561 | 6.181873 |
| gene-AT2C | 3.677445 | 3.800246 | 3.898998 | 7.835356 | 7.275101 | 9.608665 | 3.04323  | 4.380373 |
| gene-AT5C | 11.16078 | 11.68771 | 10.74278 | 7.975955 | 6.03602  | 7.961037 | 5.275034 | 4.848233 |
| gene-AT5C | 1.341709 | 2.27918  | 2.251411 | 1.037535 | 0.893236 | 1.397524 | 0.573428 | 0.426378 |

|           |          |          |          |          |          |          |          |          |
|-----------|----------|----------|----------|----------|----------|----------|----------|----------|
| gene-AT5C | 0.253943 | 0.265768 | 0.152327 | 0.778933 | 0.949538 | 0.883647 | 0.334764 | 0.417591 |
| gene-AT3C | 5.532495 | 4.732358 | 5.29665  | 5.471867 | 5.876683 | 5.125747 | 1.659891 | 1.707389 |
| gene-AT1C | 23.34655 | 24.15889 | 25.41111 | 19.18938 | 18.4118  | 19.9397  | 39.23251 | 40.8832  |
| gene-AT2C | 18.15825 | 17.70086 | 16.09864 | 10.97981 | 11.6532  | 12.24255 | 17.15545 | 17.10716 |
| gene-AT2C | 5.072026 | 5.173465 | 4.569276 | 4.315503 | 4.491175 | 3.02079  | 6.787857 | 7.351562 |
| gene-AT2C | 2.314391 | 2.369233 | 1.91317  | 2.207469 | 2.74204  | 2.492508 | 4.035818 | 3.286286 |
| gene-AT4C | 19.69508 | 19.97472 | 18.55296 | 23.49479 | 23.87814 | 22.17581 | 20.98275 | 20.89792 |
| gene-AT4C | 50.68051 | 51.966   | 50.60551 | 51.39696 | 53.24507 | 50.97035 | 32.32149 | 35.70048 |
| gene-AT1C | 1.257476 | 1.03754  | 0.921035 | 0.792103 | 1.38241  | 1.939721 | 0.637963 | 0.793238 |
| gene-AT4C | 1.009476 | 1.277981 | 1.01459  | 1.834727 | 1.646946 | 2.259343 | 1.438571 | 1.152809 |
| gene-AT3C | 17.72667 | 18.94062 | 17.38812 | 8.999178 | 8.050477 | 8.497509 | 10.19363 | 11.19536 |
| gene-AT4C | 72.00916 | 81.72801 | 74.71846 | 47.09882 | 42.19861 | 43.21503 | 124.3835 | 112.1814 |
| gene-AT4C | 5.482555 | 5.196098 | 6.159425 | 5.351021 | 5.016238 | 6.393333 | 1.86965  | 1.999117 |
| gene-AT4C | 6.37633  | 6.870478 | 7.974056 | 5.161831 | 4.502767 | 5.887541 | 10.34877 | 10.27681 |
| gene-AT5C | 1.632169 | 2.092194 | 1.875438 | 2.333015 | 3.05154  | 1.833074 | 2.438973 | 2.758876 |
| gene-AT1C | 14.13824 | 13.17938 | 13.0282  | 22.03026 | 21.627   | 24.16172 | 1.018825 | 1.093104 |
| gene-AT4C | 1.007331 | 1.429546 | 1.473303 | 3.316469 | 3.241593 | 2.78173  | 1.212755 | 0.991989 |
| gene-AT4C | 2.158979 | 1.153797 | 1.19636  | 2.753419 | 1.050012 | 2.233993 | 0.784242 | 0.858979 |
| gene-AT4C | 2.359569 | 2.01614  | 2.238061 | 3.13105  | 2.401435 | 2.452542 | 3.214197 | 3.44018  |
| gene-AT1C | 19.54001 | 18.04431 | 17.96284 | 14.03838 | 13.08881 | 13.24542 | 20.52208 | 22.33477 |
| gene-AT2C | 5.708704 | 4.932903 | 5.027042 | 3.558394 | 3.086579 | 3.27494  | 8.178931 | 8.10756  |
| gene-AT1C | 27.21036 | 28.27611 | 28.92663 | 22.43733 | 20.73959 | 21.7052  | 38.81025 | 36.23926 |
| gene-AT2C | 11.78498 | 11.32767 | 10.66158 | 9.371956 | 10.65449 | 9.87444  | 2.826353 | 2.705743 |
| gene-AT5C | 10.59212 | 8.125473 | 9.190034 | 14.94029 | 14.27729 | 15.72382 | 5.722138 | 4.44439  |
| gene-AT1C | 0.577515 | 0.573586 | 0.494788 | 1.251814 | 1.035003 | 1.541385 | 0.456898 | 0.288486 |
| gene-AT2C | 0.458427 | 0.559863 | 1.349986 | 1.973145 | 1.583034 | 2.165203 | 0.332286 | 1.163447 |
| gene-AT1C | 29.30533 | 31.39261 | 30.26842 | 22.03792 | 21.68749 | 20.03409 | 42.99614 | 47.9235  |
| gene-AT4C | 6.782059 | 6.666891 | 6.774395 | 13.32095 | 12.39676 | 14.32032 | 5.773073 | 5.812922 |
| gene-AT3C | 14.74063 | 14.01702 | 14.66789 | 6.101903 | 6.414115 | 5.943805 | 5.083961 | 5.142322 |
| gene-AT1C | 25.42255 | 24.8772  | 24.57689 | 17.9366  | 18.72546 | 17.30938 | 7.857248 | 8.222155 |
| gene-AT5C | 4.587234 | 3.823997 | 4.104329 | 8.225317 | 8.173305 | 8.518418 | 2.254966 | 2.685896 |
| gene-AT3C | 8.500097 | 9.107533 | 8.503284 | 4.682011 | 5.711457 | 4.986466 | 16.5088  | 15.93495 |
| gene-AT3C | 0.424212 | 0.767279 | 0.512321 | 1.874697 | 1.414748 | 1.407479 | 0.318107 | 0.125704 |
| gene-AT5C | 3.596234 | 3.523565 | 3.108067 | 3.122273 | 2.777588 | 3.077951 | 1.18055  | 0.745175 |
| gene-AT2C | 6.603308 | 7.404022 | 7.206143 | 3.540949 | 2.21174  | 3.382478 | 15.29411 | 15.72954 |
| gene-AT5C | 3.703082 | 4.250196 | 4.420107 | 6.474813 | 7.924607 | 8.002087 | 5.015672 | 4.019212 |
| gene-AT4C | 10.26465 | 11.24971 | 11.93476 | 9.709323 | 10.08075 | 9.958501 | 12.01455 | 12.10949 |
| gene-AT4C | 5.571002 | 4.700742 | 5.827211 | 6.518567 | 8.423331 | 7.413148 | 2.918302 | 2.900579 |
| gene-AT4C | 4.774577 | 4.750597 | 4.146263 | 2.927862 | 2.547201 | 1.974998 | 12.79046 | 14.0167  |
| gene-AT3C | 50.20294 | 46.89544 | 48.34224 | 77.77727 | 72.32652 | 75.49835 | 38.56211 | 39.89164 |
| gene-AT4C | 2.340248 | 1.800956 | 2.263033 | 2.264148 | 1.953461 | 1.398152 | 2.196636 | 2.167464 |
| gene-AT5C | 13.5262  | 14.55065 | 13.25804 | 4.841312 | 5.033219 | 5.100065 | 4.916567 | 5.855183 |
| gene-AT1C | 0.509954 | 0.290399 | 0.205507 | 1.117487 | 1.031294 | 0.799177 | 0.357148 | 0.181457 |
| gene-AT4C | 2.00894  | 1.357928 | 1.820904 | 2.590075 | 2.305269 | 2.304187 | 2.114633 | 2.491222 |
| gene-AT1C | 1.920038 | 1.996348 | 1.855724 | 2.823375 | 1.990606 | 1.97801  | 4.089123 | 5.242454 |
| gene-AT1C | 41.25409 | 38.87572 | 40.24316 | 46.02699 | 39.38012 | 39.3934  | 70.42818 | 77.74759 |
| gene-AT2C | 22.33949 | 21.03169 | 19.31088 | 18.29982 | 16.83678 | 16.68962 | 21.9691  | 22.78097 |
| gene-AT5C | 11.09399 | 10.12489 | 9.996592 | 3.746678 | 3.000212 | 3.388884 | 0.739344 | 1.192144 |
| gene-AT4C | 5.357222 | 5.338165 | 5.498268 | 2.830002 | 2.307288 | 1.867784 | 8.472492 | 9.130776 |
| gene-AT2C | 7.830873 | 7.990644 | 6.86322  | 6.47997  | 6.535813 | 6.685733 | 2.396012 | 2.546844 |
| gene-AT3C | 0.864593 | 0.584432 | 0.554964 | 0.686816 | 0.994665 | 0.840952 | 1.023526 | 1.008728 |

|            |          |          |          |          |          |          |          |          |
|------------|----------|----------|----------|----------|----------|----------|----------|----------|
| gene-AT1C  | 113.3692 | 113.2834 | 118.948  | 74.3802  | 72.68908 | 71.43181 | 210.2322 | 202.4324 |
| gene-AT1C  | 8.780987 | 8.945162 | 7.738534 | 1.832027 | 1.478595 | 1.986099 | 16.12842 | 17.06142 |
| gene-AT1C  | 228.7943 | 225.071  | 231.3378 | 76.77666 | 74.74411 | 75.59014 | 211.4576 | 216.4983 |
| gene-AT1C  | 7.007991 | 6.276791 | 6.618219 | 8.400372 | 9.36274  | 8.663034 | 1.814195 | 2.268813 |
| gene-AT5C  | 37.69272 | 40.6033  | 40.49655 | 30.69027 | 29.82949 | 27.53706 | 70.55961 | 69.86164 |
| gene-AT1C  | 5.132736 | 4.495451 | 4.291402 | 4.384682 | 3.687958 | 4.421037 | 1.374909 | 1.619321 |
| gene-AT1C  | 6.472301 | 4.921821 | 5.387555 | 4.140695 | 5.376596 | 5.071204 | 6.322386 | 6.715075 |
| gene-AT5C  | 0.505128 | 0.223897 | 0.324454 | 0.497004 | 0.487577 | 0.67928  | 0.488117 | 0.750439 |
| gene-AT4C  | 1.352944 | 1.285926 | 1.456866 | 2.478723 | 2.260092 | 2.275751 | 3.354397 | 4.652006 |
| gene-AT1C  | 140.5515 | 142.8959 | 134.0645 | 65.98017 | 63.02538 | 63.19896 | 80.03307 | 80.02294 |
| gene-AT1C  | 260.848  | 265.7116 | 276.3699 | 106.1998 | 112.6665 | 103.9591 | 425.1589 | 456.3026 |
| gene-AT3C  | 17.02376 | 17.10127 | 15.19601 | 13.61084 | 11.49314 | 12.64682 | 5.395967 | 4.334558 |
| gene-AT3C  | 4.365957 | 4.454659 | 4.269442 | 4.33608  | 2.752473 | 2.957194 | 10.37383 | 11.12597 |
| gene-AT1C  | 2.526042 | 5.670803 | 6.61381  | 6.06629  | 6.073918 | 3.481327 | 4.535364 | 5.93056  |
| gene-AT5C  | 1.66459  | 1.557863 | 1.260023 | 40.74191 | 39.83371 | 38.89686 | 4.396162 | 4.180395 |
| gene-AT4C  | 3.020741 | 2.683676 | 2.675936 | 1.084471 | 1.155278 | 0.70266  | 0.992137 | 1.423102 |
| gene-AT3C  | 91.31735 | 94.15797 | 92.31922 | 51.68965 | 50.22654 | 48.59432 | 129.4209 | 130.5454 |
| gene-AT3C  | 1.54177  | 2.343645 | 2.87356  | 5.37175  | 3.838384 | 4.197517 | 2.172076 | 2.128185 |
| gene-AT2C  | 1.939618 | 1.949446 | 1.976125 | 3.776412 | 2.980585 | 3.152065 | 0.762423 | 1.12208  |
| gene-AT2C  | 1.554664 | 1.422991 | 1.804522 | 1.346619 | 1.76294  | 0.918575 | 0.773686 | 0.831484 |
| gene-AT3C  | 34.90525 | 35.22483 | 35.59601 | 23.04101 | 22.02845 | 22.98758 | 29.47317 | 32.30251 |
| gene-AT5C  | 2.381258 | 1.36052  | 1.540245 | 0.890279 | 1.080044 | 0.588392 | 5.349545 | 6.833795 |
| gene-AT5C  | 4.308704 | 3.865377 | 4.850061 | 2.589824 | 3.770738 | 2.739349 | 6.715037 | 6.851892 |
| gene-AT4C  | 12.52967 | 10.92447 | 13.10147 | 7.891303 | 6.648906 | 6.885284 | 0.712745 | 0.623205 |
| Arabidopsi | 0.150405 | 0        | 0.190295 | 2.222042 | 1.607054 | 1.361195 | 0.85145  | 0.310381 |
| gene-AT5C  | 37.07842 | 34.4007  | 36.33821 | 34.36533 | 34.26476 | 33.47515 | 133.9872 | 133.9765 |
| Arabidopsi | 2.311328 | 1.962825 | 2.511036 | 5.337193 | 5.853403 | 6.813074 | 0.850656 | 0.581942 |
| gene-AT2C  | 4.697524 | 6.70847  | 6.577118 | 9.274863 | 10.10968 | 9.983872 | 3.627855 | 3.42259  |
| gene-AT2C  | 10.68841 | 9.110562 | 8.518053 | 9.93263  | 7.947296 | 8.776692 | 4.010368 | 3.29677  |
| gene-AT2C  | 1.853855 | 2.226355 | 1.615904 | 3.42969  | 3.714836 | 2.701703 | 1.420633 | 1.362185 |
| gene-AT2C  | 2.116633 | 2.479313 | 3.199029 | 3.679879 | 3.177859 | 2.44227  | 1.795474 | 1.342919 |
| gene-AT5C  | 17.02451 | 17.35982 | 19.22587 | 29.5795  | 30.82233 | 27.80075 | 14.42476 | 13.32748 |
| gene-AT4C  | 0.784874 | 0.472984 | 1.007609 | 1.712752 | 1.812625 | 1.80547  | 0.621638 | 0.79225  |
| gene-AT3C  | 3.646758 | 2.735861 | 2.855185 | 23.40388 | 22.96519 | 21.49087 | 2.986997 | 1.948402 |
| gene-AT1C  | 10.47882 | 13.82947 | 10.37439 | 5.719496 | 5.535072 | 6.993582 | 16.81249 | 17.54655 |
| gene-AT1C  | 17.42235 | 16.49076 | 18.11896 | 10.65109 | 10.74355 | 11.73312 | 33.19881 | 32.78871 |
| gene-AT1C  | 0.393705 | 0.13767  | 0.112614 | 0.172365 | 0.203216 | 0.096241 | 0.123429 | 0.073414 |
| gene-AT1C  | 15.31869 | 13.82721 | 13.92289 | 7.193378 | 7.804772 | 7.275958 | 20.80771 | 19.68221 |
| gene-AT4C  | 1.183458 | 1.439458 | 1.036476 | 0.908386 | 1.382888 | 1.184358 | 0        | 0        |
| gene-AT2C  | 4.523116 | 4.003688 | 4.272412 | 4.4184   | 2.768098 | 3.967254 | 8.04608  | 5.398529 |
| gene-AT4C  | 1.550518 | 1.241796 | 1.290061 | 0.992043 | 0.902556 | 0.93273  | 2.188912 | 2.157552 |
| gene-AT1C  | 7.831491 | 7.749019 | 8.64141  | 6.785401 | 6.62469  | 7.198233 | 3.075004 | 2.609977 |
| gene-AT3C  | 0.387762 | 0.270185 | 0.341277 | 0.201308 | 0.260754 | 0.249927 | 0.013301 | 0.015361 |
| gene-AT4C  | 12.42097 | 12.07929 | 10.7445  | 6.535381 | 5.249127 | 5.527394 | 2.454353 | 1.981535 |
| gene-AT2C  | 14.28811 | 13.72705 | 13.66187 | 7.835722 | 6.729169 | 7.686302 | 31.25071 | 31.84857 |
| gene-AT4C  | 17.28322 | 16.65728 | 17.0771  | 12.8229  | 12.07101 | 12.3891  | 4.338346 | 4.939822 |
| gene-AT5C  | 1.3331   | 0.930656 | 1.182252 | 1.445385 | 1.969508 | 1.482547 | 1.885417 | 1.928431 |
| gene-AT2C  | 13.94274 | 16.05257 | 17.48015 | 51.07243 | 49.27056 | 49.77425 | 14.48225 | 13.73599 |
| gene-AT5C  | 0.751977 | 0.537293 | 0.509144 | 1.214521 | 0.753476 | 1.063107 | 1.424578 | 1.063555 |
| gene-AT4C  | 0.512459 | 0.431908 | 0.356486 | 0.978741 | 0.92846  | 1.328108 | 0.345137 | 0.391411 |
| gene-AT1C  | 11.00143 | 9.100661 | 11.66638 | 14.49565 | 14.87973 | 13.52331 | 0.285199 | 0.430523 |

|           |          |          |          |          |          |          |          |          |
|-----------|----------|----------|----------|----------|----------|----------|----------|----------|
| gene-AT2C | 17.83556 | 16.18701 | 15.64795 | 30.36047 | 28.93901 | 32.77891 | 18.68904 | 17.13706 |
| gene-AT5C | 7.492956 | 9.097179 | 8.418453 | 14.61703 | 12.7781  | 12.62284 | 15.24161 | 14.80919 |
| gene-AT1C | 222.8791 | 212.262  | 231.213  | 152.356  | 143.8038 | 151.7167 | 223.7921 | 235.0898 |
| gene-AT4C | 19.98461 | 19.32733 | 19.72902 | 24.00074 | 24.18233 | 24.11729 | 11.92815 | 11.86252 |
| gene-AT1C | 7.237309 | 6.335143 | 6.615592 | 4.120995 | 3.211979 | 4.054626 | 2.274423 | 2.778097 |
| gene-AT5C | 9.446058 | 10.35341 | 10.82159 | 9.061413 | 9.492091 | 10.10316 | 9.825266 | 10.13194 |
| gene-AT5C | 8.25295  | 7.088247 | 9.613421 | 7.450224 | 5.993733 | 6.541034 | 5.570065 | 6.052704 |
| gene-AT3C | 9.318891 | 10.98044 | 11.42515 | 12.13094 | 12.45413 | 13.1065  | 4.654674 | 4.207104 |
| gene-AT2C | 3.25049  | 3.139377 | 2.366425 | 0.849084 | 1.207552 | 1.421435 | 4.052607 | 3.75231  |
| gene-AT3C | 34.86041 | 32.75583 | 34.43776 | 31.67175 | 28.92252 | 30.14005 | 38.03082 | 37.50739 |
| gene-AT1C | 11.75803 | 11.4762  | 13.23787 | 11.15568 | 11.72143 | 9.438227 | 26.05913 | 23.18747 |
| gene-AT5C | 28.56631 | 29.13995 | 31.54523 | 18.97286 | 20.73253 | 21.14549 | 49.95794 | 51.77917 |
| gene-AT5C | 4.789648 | 4.206481 | 3.96461  | 12.49405 | 12.15388 | 11.93341 | 3.986907 | 4.212493 |
| gene-AT3C | 0.586282 | 0.7      | 0.680531 | 0.737993 | 1.349385 | 1.520629 | 0.321907 | 0.702107 |
| gene-AT3C | 273.1191 | 274.8017 | 272.6751 | 285.7015 | 281.8326 | 280.2742 | 264.4927 | 276.5637 |
| gene-AT1C | 15.49865 | 13.93212 | 13.22019 | 8.280274 | 8.965605 | 7.359097 | 16.29528 | 20.80957 |
| gene-AT1C | 35.20118 | 36.39677 | 36.77285 | 28.89262 | 29.67328 | 28.04812 | 50.51569 | 50.95366 |
| gene-AT3C | 0.653831 | 0.685079 | 0.383577 | 0.50922  | 0.681759 | 0.523565 | 1.352357 | 0.962394 |
| gene-AT1C | 4.770529 | 4.116698 | 4.002638 | 0.296371 | 0.248641 | 0.587584 | 0.547525 | 0.653561 |
| gene-AT3C | 4.915466 | 4.307069 | 4.10941  | 3.647804 | 3.856386 | 4.01234  | 4.900413 | 5.439342 |
| gene-AT3C | 13.31452 | 15.46603 | 13.41247 | 9.319168 | 11.21662 | 9.981709 | 17.31441 | 18.71632 |
| gene-AT1C | 9.517507 | 9.979764 | 8.047155 | 21.10303 | 19.93828 | 20.56514 | 2.36644  | 1.649052 |
| gene-AT1C | 0.337554 | 0.299673 | 0.271537 | 0.149932 | 0.10215  | 0.302729 | 1.986689 | 2.608903 |
| gene-AT3C | 6.926817 | 6.265079 | 6.624234 | 10.84976 | 12.38527 | 11.99946 | 4.783012 | 6.026771 |
| gene-AT4C | 4.020441 | 4.014357 | 4.228012 | 5.56885  | 5.797782 | 4.559875 | 5.608263 | 5.982892 |
| gene-AT4C | 27.10456 | 25.09055 | 28.68146 | 20.63386 | 20.27435 | 22.79436 | 51.87371 | 51.0054  |
| gene-AT3C | 5.595556 | 4.507942 | 3.967527 | 4.921677 | 6.028779 | 5.589238 | 8.323299 | 6.834863 |
| gene-AT3C | 2.864123 | 2.511248 | 2.930003 | 5.630153 | 4.846035 | 5.104369 | 4.925905 | 4.54603  |
| gene-AT4C | 5.210903 | 4.35286  | 4.586645 | 13.30526 | 14.77242 | 12.47291 | 2.807161 | 3.19738  |
| gene-AT1C | 4.596862 | 4.143087 | 4.333953 | 3.782322 | 3.300802 | 3.141993 | 1.647219 | 2.264134 |
| gene-AT3C | 15.71738 | 13.80734 | 14.8854  | 21.03998 | 21.88064 | 19.73365 | 10.07802 | 11.24808 |
| gene-AT5C | 19.26463 | 16.29847 | 19.4246  | 21.19877 | 19.87637 | 23.27646 | 6.595676 | 5.706343 |
| gene-AT3C | 21.08915 | 20.07064 | 20.57795 | 6.51569  | 7.66879  | 6.203375 | 4.08281  | 4.2837   |
| gene-AT5C | 75.38601 | 76.70632 | 78.14122 | 231.3869 | 234.1075 | 233.9746 | 64.519   | 73.11174 |
| gene-AT2C | 15.04492 | 16.54237 | 17.04488 | 9.016011 | 7.921386 | 8.321826 | 20.09163 | 20.58121 |
| gene-AT4C | 7.24081  | 7.377237 | 7.890279 | 11.6733  | 11.72329 | 12.58177 | 7.970978 | 7.634131 |
| gene-AT5C | 21.60736 | 21.04418 | 24.27433 | 16.57359 | 16.70545 | 13.96341 | 9.02623  | 10.55754 |
| gene-AT1C | 2.721379 | 3.747205 | 4.331434 | 8.428893 | 8.926852 | 7.946909 | 2.941084 | 3.042644 |
| gene-AT1C | 274.3412 | 262.341  | 279.0445 | 348.6705 | 361.8966 | 358.1325 | 97.79538 | 105.2756 |
| gene-AT4C | 26.32643 | 22.90838 | 24.43943 | 13.80061 | 12.89947 | 15.53565 | 30.04301 | 30.56797 |
| gene-AT2C | 6.449972 | 6.218313 | 5.612043 | 8.703123 | 7.267942 | 8.352168 | 9.102679 | 6.690857 |
| gene-AT4C | 1.775771 | 1.444602 | 1.800544 | 1.169145 | 1.125165 | 0.983174 | 0.571893 | 0.730684 |
| gene-AT1C | 6.623477 | 5.562368 | 7.595249 | 8.015397 | 8.146865 | 7.720569 | 3.544382 | 3.434438 |
| gene-AT3C | 0.958206 | 0.879346 | 1.077303 | 1.522527 | 1.290669 | 1.562547 | 1.704811 | 2.612218 |
| gene-AT1C | 1.747234 | 2.425488 | 2.679266 | 1.639787 | 1.688586 | 1.709466 | 1.149377 | 0.634307 |
| gene-AT5C | 8.205219 | 9.752454 | 9.43368  | 9.254275 | 11.29072 | 8.471325 | 14.48853 | 12.1704  |
| gene-AT2C | 10.02642 | 9.851243 | 10.75401 | 3.34903  | 3.913428 | 4.012136 | 1.160857 | 1.416742 |
| gene-AT5C | 6.664008 | 6.781299 | 5.24742  | 8.56917  | 8.022616 | 7.517769 | 2.39999  | 2.130314 |
| gene-AT2C | 26.43447 | 26.83256 | 26.00836 | 16.98816 | 17.58565 | 15.86693 | 40.24382 | 40.49831 |
| gene-AT2C | 1.530908 | 1.812589 | 2.890183 | 2.040469 | 1.39373  | 2.077277 | 3.633312 | 3.573221 |
| gene-AT2C | 7.272293 | 5.997288 | 5.326545 | 43.29138 | 37.55204 | 40.4778  | 16.64959 | 16.33351 |

|            |          |          |          |          |          |          |          |          |
|------------|----------|----------|----------|----------|----------|----------|----------|----------|
| gene-AT5C  | 4.111255 | 2.954504 | 3.783531 | 9.751932 | 10.90473 | 9.192365 | 4.18788  | 4.707413 |
| gene-AT2C  | 3.821957 | 3.816006 | 2.831068 | 4.405966 | 4.504775 | 4.731587 | 1.827979 | 1.790839 |
| gene-AT1C  | 0.656571 | 0.313277 | 0.098132 | 1.176787 | 1.533384 | 1.179104 | 0.145379 | 0.112149 |
| gene-AT1C  | 7.947239 | 7.291123 | 7.382376 | 5.995153 | 5.990466 | 5.441252 | 10.69018 | 10.87596 |
| gene-AT5C  | 2.506271 | 2.623915 | 3.243051 | 4.240876 | 3.637712 | 3.137125 | 0.863226 | 1.243159 |
| gene-AT5C  | 4.985634 | 4.527823 | 4.105548 | 2.772972 | 3.567978 | 3.949983 | 3.272009 | 4.83902  |
| gene-AT4C  | 1.486268 | 1.531436 | 1.103418 | 2.871728 | 2.678555 | 3.246352 | 1.380785 | 1.090381 |
| gene-AT2C  | 11.67852 | 10.80588 | 12.0368  | 7.924641 | 7.60794  | 8.445054 | 19.76477 | 19.62246 |
| gene-AT5C  | 131.2909 | 122.7459 | 125.6241 | 104.3761 | 105.1453 | 108.2703 | 36.68753 | 41.22278 |
| gene-AT2C  | 1.688521 | 1.852054 | 1.703046 | 5.135764 | 5.80692  | 4.204393 | 2.550642 | 2.937158 |
| gene-AT1C  | 0.90178  | 0.784519 | 1.015948 | 0.247576 | 0.489624 | 0.283079 | 1.093642 | 0.71062  |
| gene-AT4C  | 4.711556 | 4.823781 | 4.157296 | 8.327534 | 8.91501  | 8.688823 | 1.706394 | 1.628655 |
| gene-AT1C  | 80.41596 | 82.46906 | 76.9763  | 90.03254 | 90.88495 | 90.96706 | 43.48676 | 47.34308 |
| gene-AT3C  | 30.09082 | 31.29839 | 27.75622 | 24.08958 | 21.46692 | 21.13016 | 42.12007 | 44.94173 |
| gene-AT2C  | 129.9014 | 124.2558 | 126.0899 | 95.5052  | 90.34658 | 90.60621 | 159.0052 | 172.2647 |
| gene-AT5C  | 8.100354 | 8.168277 | 7.784813 | 2.678719 | 2.123026 | 3.107584 | 6.21434  | 6.652053 |
| gene-AT1C  | 5.050383 | 6.635559 | 6.152368 | 11.81537 | 9.239009 | 9.054734 | 7.572083 | 6.302807 |
| Arabidopsi | 1.706266 | 1.220929 | 1.726837 | 0.308994 | 0.758135 | 0.493573 | 0.975932 | 1.278683 |
| gene-AT4C  | 2.038952 | 1.839429 | 1.675234 | 8.29652  | 7.091501 | 8.08987  | 6.280447 | 5.337606 |
| gene-AT4C  | 29.72001 | 28.74197 | 31.73477 | 46.4967  | 41.99351 | 41.53849 | 15.16341 | 16.01644 |
| gene-AT1C  | 301.9096 | 294.0156 | 300.8643 | 117.2599 | 116.7031 | 113.9359 | 188.3261 | 204.4175 |
| gene-AT1C  | 1.428689 | 1.567695 | 1.486293 | 1.307497 | 0.895017 | 1.491185 | 0.036946 | 0.373985 |
| gene-AT3C  | 243.1246 | 245.9293 | 256.894  | 366.3516 | 353.278  | 341.747  | 148.1315 | 141.4438 |
| gene-AT2C  | 7.12552  | 5.748488 | 6.028914 | 2.500514 | 2.85849  | 2.567902 | 5.041936 | 3.715193 |
| gene-AT5C  | 20.58459 | 21.08986 | 19.23966 | 6.554556 | 7.584336 | 6.182626 | 2.583311 | 3.464784 |
| gene-AT4C  | 0.830533 | 0.7732   | 0.332428 | 0.961347 | 1.136044 | 0.890067 | 0.562913 | 0.417128 |
| gene-AT4C  | 1.09889  | 1.861636 | 1.536528 | 1.693476 | 1.725433 | 0.982968 | 0.188815 | 0.598862 |
| gene-AT5C  | 1.323879 | 1.425464 | 1.214857 | 0.944767 | 1.245347 | 0.557951 | 0.361265 | 0.323512 |
| gene-AT1C  | 14.27836 | 13.74831 | 14.15445 | 6.25155  | 5.157412 | 6.247734 | 7.073838 | 7.087204 |
| gene-AT4C  | 20.67778 | 19.92632 | 18.065   | 28.48    | 30.21361 | 28.15609 | 27.79665 | 29.54721 |
| gene-AT1C  | 7.347095 | 5.410743 | 6.405526 | 7.032716 | 7.736111 | 7.402546 | 1.390938 | 2.432945 |
| gene-AT1C  | 19.81127 | 16.28637 | 19.3653  | 9.526355 | 9.686417 | 8.185922 | 9.958796 | 10.92514 |
| gene-AT3C  | 6.994638 | 7.543727 | 7.582426 | 6.405735 | 6.039765 | 6.539491 | 9.898885 | 8.654721 |
| gene-AT3C  | 12.48233 | 12.39508 | 13.67766 | 13.62081 | 14.44334 | 13.24848 | 8.234157 | 7.846021 |
| gene-AT5C  | 0.735371 | 0.619973 | 0.764381 | 5.547388 | 6.07832  | 6.163053 | 4.913582 | 5.784618 |
| gene-AT5C  | 1.334571 | 1.335087 | 1.861303 | 0.989307 | 1.330585 | 1.3596   | 1.585552 | 1.59773  |
| gene-AT3C  | 1.766431 | 1.268895 | 1.638605 | 1.029281 | 0.896416 | 1.090925 | 1.209835 | 0.909934 |
| gene-AT3C  | 5.788648 | 3.404533 | 4.093509 | 4.743989 | 4.275439 | 6.178803 | 1.435317 | 0.898145 |
| gene-AT5C  | 4.012208 | 4.639828 | 4.89362  | 32.01414 | 30.13278 | 31.72413 | 1.262784 | 0.966257 |
| gene-AT1C  | 9.163077 | 10.94012 | 9.718935 | 11.60414 | 11.14582 | 10.71734 | 3.606797 | 3.301518 |
| gene-AT1C  | 64.11925 | 60.98764 | 64.7351  | 35.60458 | 36.02146 | 38.14923 | 98.84837 | 104.8362 |
| gene-AT4C  | 3.790238 | 3.799263 | 5.244225 | 10.00629 | 8.755434 | 9.348111 | 2.406475 | 3.797387 |
| gene-AT1C  | 3.322431 | 3.568881 | 3.433933 | 7.357184 | 7.922168 | 6.722911 | 2.630208 | 2.549452 |
| gene-AT1C  | 605.0459 | 593.8958 | 585.003  | 467.5054 | 468.765  | 467.4864 | 790.7387 | 782.5436 |
| gene-AT2C  | 7.501184 | 6.745888 | 6.722149 | 8.482588 | 8.448001 | 8.002735 | 8.805877 | 8.736328 |
| gene-AT3C  | 14.58542 | 14.24307 | 14.97774 | 6.895802 | 6.56835  | 6.904914 | 24.81817 | 24.59486 |
| gene-AT5C  | 35.36418 | 37.03854 | 34.9169  | 23.75084 | 21.65693 | 23.52866 | 11.20703 | 11.15603 |
| gene-AT4C  | 14.23089 | 13.9741  | 13.4763  | 9.666449 | 8.892467 | 9.381936 | 25.02606 | 22.60061 |
| gene-AT2C  | 10.37291 | 9.655176 | 10.22705 | 10.58569 | 9.126311 | 10.57737 | 9.147827 | 10.39302 |
| gene-AT1C  | 1.92328  | 1.282411 | 1.662466 | 2.096732 | 1.742279 | 1.553492 | 1.206152 | 1.007633 |
| gene-AT1C  | 0.41467  | 0.254321 | 0.404165 | 0.744033 | 0.438088 | 0.42118  | 0.929988 | 1.082022 |

|           |          |          |          |          |          |          |          |          |
|-----------|----------|----------|----------|----------|----------|----------|----------|----------|
| gene-AT2C | 25.55936 | 28.50635 | 25.3521  | 3.854455 | 4.721541 | 5.333068 | 66.82915 | 71.43588 |
| gene-AT4C | 5.165546 | 4.609551 | 5.282278 | 4.945888 | 5.316443 | 4.599113 | 6.289697 | 7.939422 |
| gene-AT4C | 5.57329  | 5.767196 | 5.572928 | 0.872777 | 0.956531 | 0.943872 | 1.235031 | 1.277295 |
| gene-AT5C | 50.18494 | 50.40039 | 49.52951 | 28.48837 | 30.39868 | 30.1962  | 84.39086 | 84.92211 |
| gene-AT3C | 10.78094 | 11.50838 | 11.68178 | 5.959896 | 5.712022 | 3.768532 | 19.47327 | 19.83115 |
| gene-AT5C | 2.136646 | 1.921752 | 2.805819 | 1.479902 | 1.504895 | 1.662201 | 0.909582 | 0.87221  |
| gene-AT1C | 12.1928  | 11.81715 | 11.6266  | 7.718709 | 5.883666 | 5.780581 | 6.456059 | 6.68073  |
| gene-AT2C | 2.361503 | 2.45123  | 2.266767 | 1.334725 | 2.247863 | 1.537068 | 1.029207 | 1.196878 |
| gene-AT1C | 0.76784  | 0.558829 | 0.733712 | 0.885061 | 0.555638 | 0.468618 | 0.798381 | 0.986709 |
| gene-AT5C | 2.441871 | 2.176072 | 2.711841 | 1.569384 | 2.591623 | 2.138037 | 2.139198 | 2.682911 |
| gene-AT5C | 3.204219 | 3.489168 | 3.266349 | 4.659276 | 4.918082 | 4.524133 | 2.407853 | 2.796176 |
| gene-AT5C | 67.14408 | 64.71587 | 66.85826 | 94.87091 | 93.79716 | 88.367   | 106.0204 | 110.7761 |
| gene-AT1C | 6.488598 | 7.524375 | 7.293116 | 7.032503 | 5.576191 | 6.404087 | 9.798583 | 9.16015  |
| gene-AT3C | 6.684103 | 5.815374 | 6.215429 | 2.830623 | 1.868595 | 2.53651  | 3.435129 | 2.860064 |
| gene-AT4C | 21.6684  | 18.86393 | 17.75418 | 17.04297 | 15.38786 | 17.76675 | 34.37049 | 32.4734  |
| gene-AT2C | 3.019795 | 3.240558 | 2.987281 | 5.881766 | 4.663051 | 6.352194 | 0.173552 | 0.206013 |
| gene-AT2C | 19.78824 | 20.11735 | 22.52092 | 32.49936 | 30.49247 | 31.38606 | 9.613867 | 9.504721 |
| gene-AT5C | 2.668124 | 3.07152  | 3.734564 | 1.368077 | 1.604594 | 1.748641 | 0.915117 | 1.055172 |
| gene-AT3C | 16.10826 | 17.09067 | 16.07815 | 17.96616 | 18.1736  | 18.11626 | 4.603824 | 4.914694 |
| gene-AT2C | 0.07491  | 0.148156 | 0        | 2.207417 | 1.674347 | 1.913817 | 0.087124 | 0.046692 |
| gene-AT2C | 0.586382 | 0.354684 | 0.31608  | 0.181304 | 0.158016 | 0.272677 | 0.595818 | 0.519717 |
| gene-AT5C | 6.044426 | 6.938061 | 7.026344 | 1.374613 | 1.261574 | 1.64551  | 0.222078 | 0.207719 |
| gene-AT5C | 52.26065 | 50.02505 | 50.54364 | 35.66734 | 40.06548 | 37.42967 | 56.93838 | 60.84201 |
| gene-AT3C | 9.81063  | 9.511198 | 10.81143 | 8.473187 | 9.102201 | 9.532265 | 5.272983 | 5.480029 |
| gene-AT5C | 10.28853 | 10.32027 | 10.56096 | 9.291528 | 9.449765 | 10.10611 | 16.6436  | 19.32667 |
| gene-AT4C | 1.880087 | 1.549092 | 1.345731 | 1.087204 | 1.493373 | 1.159737 | 2.117082 | 1.444859 |
| gene-AT1C | 11.35194 | 10.813   | 11.22003 | 11.36556 | 10.6973  | 11.75351 | 2.78263  | 3.330454 |
| gene-AT1C | 5.377975 | 6.091792 | 6.147588 | 9.623849 | 9.554639 | 9.272693 | 2.550246 | 2.759124 |
| gene-AT3C | 4.001961 | 4.950081 | 4.105379 | 3.669424 | 4.657731 | 4.495395 | 3.210518 | 3.173262 |
| gene-AT1C | 41.50618 | 43.30487 | 45.79515 | 38.88884 | 40.00202 | 40.48153 | 29.65086 | 27.00978 |
| gene-AT3C | 10.37898 | 11.76792 | 10.93151 | 6.725681 | 7.954228 | 7.462401 | 9.197845 | 10.42518 |
| gene-AT1C | 95.90776 | 94.74728 | 95.44864 | 35.22723 | 36.0216  | 33.26452 | 48.43425 | 51.73087 |
| gene-AT3C | 7.346268 | 6.721188 | 5.53308  | 5.86324  | 5.974234 | 5.798491 | 3.949057 | 3.662708 |
| gene-AT1C | 1.063675 | 1.301752 | 1.412395 | 1.319858 | 1.189852 | 1.22852  | 2.432824 | 2.377781 |
| gene-AT3C | 8.044837 | 8.449944 | 8.539262 | 7.82507  | 6.793185 | 7.69716  | 11.51668 | 11.97302 |
| gene-AT5C | 218.4319 | 217.9313 | 212.1474 | 123.0305 | 118.7977 | 121.4468 | 314.6064 | 342.6888 |
| gene-AT1C | 0.113145 | 0        | 0.202032 | 1.288919 | 1.408683 | 1.510225 | 0.07546  | 0.027743 |
| gene-AT4C | 5.618589 | 4.955875 | 4.020901 | 2.26561  | 1.968321 | 3.171324 | 4.062067 | 7.214604 |
| gene-AT2C | 0.950283 | 0.313151 | 0.781578 | 0.222508 | 0.203593 | 0.142997 | 0.99716  | 1.196276 |
| gene-AT4C | 59.36935 | 55.732   | 61.90674 | 112.2681 | 121.0852 | 112.9186 | 29.10873 | 26.22697 |
| gene-AT3C | 0.871436 | 0.729898 | 0.717932 | 0.370746 | 0.081951 | 0.35102  | 0        | 0        |
| gene-AT1C | 3.907773 | 3.762375 | 2.985666 | 2.970388 | 3.482204 | 4.095673 | 8.582125 | 6.567982 |
| gene-AT5C | 3.96529  | 3.838723 | 2.571498 | 1.798925 | 1.715525 | 1.263847 | 2.501099 | 2.651833 |
| gene-AT4C | 2.004098 | 1.516965 | 1.218508 | 0.560273 | 1.14062  | 0.648454 | 0.252567 | 0.127955 |
| gene-AT5C | 18.76901 | 18.18978 | 17.21772 | 1.688827 | 1.547441 | 2.148758 | 10.3682  | 13.69002 |
| gene-AT1C | 2.261553 | 2.593369 | 1.920074 | 3.360221 | 3.937122 | 3.517411 | 3.444103 | 6.217551 |
| gene-AT1C | 1.447914 | 0.854126 | 1.50941  | 0.957229 | 1.446517 | 1.618927 | 1.951779 | 1.235015 |
| gene-AT1C | 17.12755 | 15.20639 | 16.27968 | 8.963504 | 9.488642 | 9.555285 | 1.902614 | 2.526211 |
| gene-AT4C | 6.530999 | 5.889693 | 6.131502 | 4.12012  | 4.223591 | 3.911705 | 11.87753 | 11.81177 |
| gene-AT5C | 4.331381 | 4.753031 | 4.541332 | 7.424725 | 6.518823 | 7.674784 | 3.170878 | 2.656594 |
| gene-AT5C | 22.76077 | 23.22463 | 23.2333  | 75.52633 | 79.55051 | 77.05307 | 7.76053  | 6.883484 |

|            |          |          |          |          |          |          |          |          |
|------------|----------|----------|----------|----------|----------|----------|----------|----------|
| gene-AT5C  | 20.01206 | 18.97217 | 18.89318 | 18.60146 | 18.90214 | 17.93673 | 26.1818  | 29.47608 |
| gene-AT1C  | 2.127576 | 1.521193 | 1.323157 | 1.259097 | 1.400652 | 1.309998 | 4.912102 | 3.41799  |
| gene-AT1C  | 2.554589 | 2.606004 | 1.741196 | 3.043696 | 1.818012 | 2.55484  | 4.027357 | 3.80158  |
| gene-AT5C  | 69.47559 | 67.71605 | 67.1595  | 69.40156 | 68.29732 | 71.58147 | 61.29451 | 65.21183 |
| Arabidopsi | 1.030827 | 1.195799 | 1.114817 | 0.662328 | 0.673847 | 0.720061 | 1.094909 | 1.220557 |
| gene-AT5C  | 1163.953 | 1162.062 | 1202.827 | 561.1234 | 565.9576 | 566.4548 | 1231.058 | 1285.019 |
| gene-AT4C  | 11.39824 | 9.547654 | 9.993647 | 13.44526 | 14.6185  | 13.3771  | 3.644479 | 4.183709 |
| gene-AT3C  | 86.77506 | 82.63319 | 88.35426 | 109.0597 | 105.5686 | 110.9991 | 25.49233 | 21.35698 |
| gene-AT3C  | 4.686247 | 5.201365 | 4.748114 | 3.735326 | 3.215501 | 3.960587 | 3.108408 | 4.212912 |
| gene-AT4C  | 62.50215 | 55.12222 | 62.25705 | 50.2964  | 49.10861 | 52.46128 | 91.07995 | 94.01419 |
| gene-AT1C  | 33.4495  | 32.91554 | 31.60381 | 24.25512 | 23.81697 | 24.20488 | 71.12315 | 79.34251 |
| gene-AT5C  | 19.21956 | 18.32968 | 17.4297  | 20.21877 | 19.25793 | 17.4818  | 1.401217 | 0.888961 |
| gene-AT3C  | 1.466233 | 1.295149 | 1.22735  | 1.998966 | 0.881915 | 1.524763 | 0.250879 | 0.694841 |
| gene-AT4C  | 7.013253 | 6.139287 | 6.423818 | 3.620858 | 3.329895 | 3.076807 | 1.521274 | 1.978443 |
| gene-AT2C  | 12.09943 | 16.28198 | 13.76088 | 12.3512  | 11.28632 | 11.68998 | 5.916035 | 7.048659 |
| gene-AT2C  | 0.407952 | 0.501269 | 0.960422 | 0.082189 | 0.138259 | 0.099851 | 0.839707 | 0.635557 |
| gene-AT4C  | 64.75839 | 59.58211 | 59.2671  | 61.29443 | 64.43322 | 57.84795 | 110.7134 | 115.5053 |
| gene-AT5C  | 21.94479 | 23.53145 | 22.53363 | 17.25795 | 17.71239 | 18.22448 | 37.30581 | 37.68414 |
| gene-AT2C  | 621.4229 | 618.9009 | 643.8524 | 397.0599 | 383.9041 | 397.2247 | 1075.676 | 966.7455 |
| gene-AT4C  | 6.629167 | 5.789776 | 5.862176 | 3.768385 | 4.643816 | 4.323793 | 6.587114 | 6.481816 |
| gene-AT1C  | 63.36472 | 60.88556 | 55.96655 | 17.60609 | 20.37495 | 18.90089 | 8.541958 | 9.478915 |
| gene-AT5C  | 7.633977 | 8.241323 | 8.769559 | 5.178312 | 5.752218 | 5.328723 | 16.26518 | 16.5333  |
| gene-AT1C  | 2.468005 | 1.997567 | 1.553969 | 5.737867 | 4.574163 | 4.032383 | 6.351421 | 5.56857  |
| gene-AT1C  | 4.0797   | 5.035069 | 4.188529 | 2.841051 | 2.856652 | 2.199514 | 19.61158 | 20.31628 |
| gene-AT1C  | 28.29881 | 27.59934 | 30.36821 | 19.85085 | 21.63157 | 20.10485 | 40.71583 | 45.44848 |
| Arabidopsi | 1.501742 | 1.636594 | 1.503204 | 0.665826 | 0.496013 | 0.412486 | 1.19173  | 1.594319 |
| Arabidopsi | 1.364597 | 1.659501 | 1.605564 | 1.850877 | 1.916555 | 2.424074 | 2.564176 | 3.294019 |
| gene-AT5C  | 25.0737  | 22.58895 | 24.2638  | 22.58698 | 22.74544 | 22.54778 | 22.04848 | 21.84441 |
| gene-AT3C  | 2.254711 | 2.945115 | 2.336796 | 1.485749 | 1.270504 | 3.228838 | 0.221627 | 0.308558 |
| gene-AT1C  | 1.537197 | 1.409858 | 1.809067 | 6.413404 | 7.291197 | 7.225782 | 0.108741 | 0        |
| gene-AT1C  | 2.395046 | 1.676466 | 1.924781 | 3.149814 | 2.220869 | 3.175431 | 1.487034 | 1.54177  |
| gene-AT1C  | 1.9032   | 1.677638 | 1.86918  | 0.618887 | 0.555833 | 0.706243 | 0.970134 | 0.885632 |
| gene-AT2C  | 1.258154 | 0.700799 | 0.898839 | 3.193783 | 1.956499 | 2.476136 | 0.418676 | 0.125523 |
| gene-AT1C  | 0.402369 | 0.765371 | 0.396951 | 3.425526 | 3.220368 | 3.000861 | 0.488216 | 0.469833 |
| gene-AT4C  | 11.44169 | 8.908474 | 9.105315 | 5.183862 | 4.393407 | 5.039575 | 3.199659 | 2.437203 |
| gene-AT3C  | 10.58534 | 12.11809 | 11.4351  | 10.91391 | 11.78192 | 12.427   | 5.366872 | 5.322903 |
| gene-AT1C  | 2.290327 | 2.378547 | 2.336077 | 5.16792  | 4.487143 | 4.662173 | 2.403544 | 1.956754 |
| gene-AT5C  | 1.858526 | 2.363273 | 2.367259 | 1.998786 | 2.468987 | 2.008299 | 0.320242 | 0.301005 |
| gene-AT3C  | 2.387348 | 2.291399 | 2.536151 | 2.463154 | 2.710901 | 2.67306  | 0.371827 | 0.431531 |
| gene-AT5C  | 353.6623 | 350.6522 | 352.7937 | 220.5183 | 223.1874 | 218.8523 | 332.473  | 363.7896 |
| gene-AT2C  | 9.396681 | 10.97186 | 9.615334 | 9.998064 | 10.57081 | 9.43701  | 2.481164 | 2.758097 |
| gene-AT5C  | 0.684533 | 0.660539 | 0.89872  | 0.484798 | 0.383334 | 0.666097 | 0.740652 | 0.725608 |
| gene-AT1C  | 2.26121  | 2.836435 | 1.498173 | 2.72384  | 3.087669 | 3.047217 | 1.174709 | 2.846978 |
| gene-AT5C  | 4.558045 | 2.463149 | 4.638668 | 3.18938  | 3.928123 | 4.187844 | 3.219168 | 4.984661 |
| gene-AT2C  | 9.412969 | 8.098927 | 9.192339 | 14.02341 | 17.04517 | 15.11719 | 1.166214 | 1.425284 |
| gene-AT4C  | 1.214597 | 1.181853 | 1.59782  | 4.004954 | 2.508683 | 2.960335 | 2.901564 | 2.368314 |
| gene-AT1C  | 1.158474 | 1.649696 | 1.009917 | 0.722252 | 0.736862 | 0.532841 | 0.207122 | 0.404022 |
| gene-AT1C  | 6.815312 | 7.165118 | 7.484942 | 6.074602 | 5.574846 | 5.638216 | 6.212286 | 6.787471 |
| gene-AT3C  | 0.184784 | 0.216421 | 0.190809 | 0.296134 | 0.446113 | 0.130366 | 0        | 0.024687 |
| gene-AT3C  | 0.650568 | 0.72831  | 0.698067 | 0.920673 | 2.3775   | 0.831085 | 0.414395 | 0.634968 |
| gene-AT1C  | 22.70112 | 22.83389 | 24.28488 | 72.74952 | 69.58263 | 72.36253 | 4.456956 | 4.496103 |



|           |          |          |          |          |          |          |          |          |
|-----------|----------|----------|----------|----------|----------|----------|----------|----------|
| gene-AT5C | 13.33818 | 11.86379 | 13.17878 | 10.17445 | 10.07994 | 9.16007  | 3.631623 | 3.493627 |
| gene-AT5C | 36.70735 | 41.01547 | 35.90822 | 37.97755 | 37.63625 | 38.59717 | 64.65186 | 67.52924 |
| gene-AT2C | 0.515788 | 0.784288 | 0.558919 | 1.36309  | 1.050698 | 0.768547 | 1.573091 | 1.436647 |
| gene-AT4C | 2.530464 | 2.059849 | 2.619434 | 0.615018 | 1.343653 | 1.395241 | 5.891229 | 5.696611 |
| gene-AT1C | 1.598482 | 1.269125 | 1.883018 | 2.378009 | 1.481539 | 1.475847 | 2.697992 | 2.722465 |
| gene-AT4C | 7.73762  | 8.690938 | 9.428525 | 6.741107 | 6.07367  | 7.995612 | 14.62955 | 14.28193 |
| gene-AT5C | 0.310303 | 0.087517 | 0.147929 | 0.893325 | 0.910228 | 0.932822 | 0.420597 | 0.201894 |
| gene-AT3C | 35.58183 | 34.08186 | 37.01761 | 36.94634 | 33.94426 | 37.30507 | 16.65246 | 16.51877 |
| gene-AT1C | 4.462266 | 4.804673 | 4.590656 | 5.626218 | 5.40828  | 5.049474 | 0.97767  | 1.112942 |
| gene-AT3C | 4.152326 | 2.711799 | 2.364042 | 3.563767 | 2.198412 | 1.74295  | 0.352374 | 0.530724 |
| gene-AT5C | 7.730741 | 9.123585 | 8.250896 | 4.567884 | 4.929078 | 4.80016  | 10.73574 | 13.11414 |
| gene-AT5C | 22.85506 | 23.80917 | 23.02925 | 23.03689 | 23.29662 | 24.62459 | 23.09182 | 23.29232 |
| gene-AT1C | 1.429505 | 1.707726 | 0.977022 | 0.987218 | 0.703595 | 1.249037 | 2.740264 | 2.045937 |
| gene-AT5C | 45.40526 | 42.60596 | 44.7416  | 68.76018 | 71.80491 | 69.42062 | 27.31749 | 29.93917 |
| gene-AT1C | 5.068453 | 4.96931  | 5.409905 | 3.488967 | 3.842716 | 3.303484 | 7.625842 | 7.894517 |
| gene-AT4C | 27.27164 | 24.52185 | 24.83159 | 27.69869 | 30.61114 | 28.46744 | 10.66663 | 10.6424  |
| gene-AT1C | 3.34916  | 2.460222 | 2.265329 | 5.667024 | 4.937519 | 4.85551  | 2.680962 | 3.05725  |
| gene-AT4C | 1.56531  | 1.234566 | 1.496277 | 1.128847 | 1.440385 | 1.408413 | 0.253546 | 0.404471 |
| gene-AT4C | 0.494719 | 0.820401 | 0.631048 | 3.441388 | 3.338863 | 3.737228 | 0.279546 | 0.63503  |
| gene-AT3C | 103.6858 | 100.5944 | 100.2271 | 93.33094 | 91.21403 | 91.30379 | 144.4471 | 153.6277 |
| gene-AT1C | 1.646288 | 1.947967 | 1.262114 | 2.183105 | 2.236779 | 2.107664 | 2.903332 | 3.181303 |
| gene-AT1C | 2.490131 | 2.895288 | 2.52169  | 1.747034 | 2.03069  | 2.266082 | 0.68236  | 0.908219 |
| gene-AT1C | 12.58368 | 10.86996 | 11.29796 | 8.01493  | 8.313637 | 9.13833  | 16.11706 | 17.97624 |
| gene-AT1C | 29.73578 | 25.91915 | 25.60113 | 30.28742 | 27.04861 | 27.92692 | 12.52349 | 12.96095 |
| gene-AT3C | 3.958909 | 3.743754 | 4.039761 | 4.965884 | 5.531852 | 3.98941  | 5.060392 | 4.60534  |
| gene-AT2C | 2.344464 | 2.722852 | 2.193501 | 2.273239 | 3.049083 | 2.65217  | 2.93353  | 3.084424 |
| gene-AT1C | 17.59534 | 18.33662 | 18.21168 | 7.070632 | 3.601022 | 7.335569 | 8.212379 | 7.087432 |
| gene-AT5C | 3.591032 | 3.309451 | 3.512167 | 7.972134 | 8.195691 | 6.88589  | 2.95807  | 3.435607 |
| gene-AT1C | 5.219332 | 5.660947 | 5.100101 | 6.487004 | 7.14676  | 6.948537 | 3.237555 | 2.973324 |
| gene-AT5C | 1.584498 | 1.588531 | 0.824494 | 0.713144 | 0.915995 | 1.207675 | 0.108154 | 0        |
| gene-AT3C | 23.40797 | 24.64532 | 25.6363  | 14.20031 | 13.69139 | 14.21358 | 4.108802 | 5.360156 |
| gene-AT5C | 38.13736 | 38.71587 | 39.78698 | 29.40902 | 27.16051 | 28.86605 | 42.6093  | 39.79129 |
| gene-AT1C | 4.959501 | 3.715648 | 3.13785  | 17.21206 | 17.50353 | 17.45232 | 6.946973 | 5.622589 |
| gene-AT4C | 15.17348 | 15.28335 | 18.49991 | 15.0306  | 13.53088 | 14.40114 | 7.694753 | 7.887726 |
| gene-AT4C | 0.714504 | 0.840114 | 0.757944 | 0.660636 | 0.734971 | 0.526969 | 1.813084 | 1.389203 |
| gene-AT5C | 0.311677 | 0.147616 | 0.091035 | 0.112453 | 0.226063 | 0.295068 | 0.634846 | 0.675515 |
| gene-AT3C | 24.64877 | 21.92976 | 21.76418 | 23.61882 | 22.51549 | 23.84474 | 21.02047 | 20.33383 |
| gene-AT3C | 13.98253 | 17.7053  | 15.61898 | 11.42684 | 12.94556 | 12.09237 | 32.72998 | 33.75938 |
| gene-AT1C | 0.511626 | 0.871351 | 0.653447 | 2.271533 | 2.968959 | 2.750062 | 1.122512 | 0.747953 |
| gene-AT2C | 2.604141 | 2.859273 | 3.16129  | 4.825645 | 4.638783 | 4.699291 | 2.221688 | 1.623674 |
| gene-AT5C | 2.305082 | 2.427708 | 2.741755 | 2.367956 | 2.590913 | 2.534798 | 0.823626 | 0.615019 |
| gene-AT2C | 3.540121 | 2.483101 | 2.778237 | 3.320178 | 3.781551 | 4.042528 | 1.364348 | 1.474778 |
| gene-AT3C | 5.410194 | 5.837912 | 6.949772 | 6.917527 | 6.815481 | 7.543026 | 2.689261 | 1.961939 |
| gene-AT3C | 3.983327 | 3.174019 | 4.167457 | 4.072729 | 4.650411 | 4.333889 | 4.36313  | 4.779661 |
| gene-AT2C | 1.716519 | 2.451644 | 1.506193 | 3.234297 | 3.135135 | 2.813665 | 4.456086 | 4.460416 |
| gene-AT4C | 10.43391 | 9.754181 | 10.73763 | 18.77638 | 19.28036 | 19.46427 | 10.03693 | 8.840803 |
| gene-AT1C | 59.11336 | 57.88469 | 56.12385 | 37.01817 | 47.29779 | 41.45476 | 93.49088 | 96.20957 |
| gene-AT1C | 0.443747 | 0.591759 | 0.424911 | 0.283262 | 0.357485 | 0.334735 | 0.624223 | 0.948056 |
| gene-AT5C | 0        | 0.040963 | 0        | 0.082947 | 0.090657 | 0.235534 | 0.180403 | 0        |
| gene-AT5C | 0.054699 | 0.134495 | 0.258772 | 1.052753 | 0.695633 | 0.919614 | 0.183098 | 0        |
| gene-AT5C | 90.06739 | 92.62566 | 80.6228  | 63.35384 | 64.92569 | 57.98974 | 171.2875 | 168.6432 |

|            |          |          |          |          |          |          |          |          |
|------------|----------|----------|----------|----------|----------|----------|----------|----------|
| gene-AT1C  | 16.54563 | 15.42675 | 16.55798 | 25.36755 | 25.00553 | 25.26466 | 12.15318 | 13.28928 |
| gene-AT1C  | 25.43999 | 24.50114 | 25.62865 | 14.02409 | 15.07641 | 15.65738 | 36.47084 | 36.03372 |
| gene-AT5C  | 0.651972 | 0.741258 | 0.616149 | 67.03418 | 66.07036 | 63.25911 | 3.143955 | 3.645301 |
| gene-AT5C  | 4.018582 | 4.102349 | 4.06958  | 5.163405 | 5.453514 | 4.837211 | 9.085129 | 9.122882 |
| gene-AT1C  | 36.55196 | 38.98907 | 37.04829 | 37.48334 | 36.35051 | 37.25815 | 55.31985 | 61.26419 |
| gene-AT3C  | 7.710315 | 7.86645  | 9.509842 | 7.20431  | 7.635025 | 7.789791 | 15.70705 | 16.08795 |
| gene-AT2C  | 4.154448 | 3.725248 | 3.784241 | 5.193475 | 4.83017  | 5.458763 | 4.68625  | 4.200831 |
| gene-AT3C  | 5.894521 | 4.969616 | 6.793755 | 34.75082 | 35.70648 | 35.80043 | 3.06486  | 2.52522  |
| gene-AT4C  | 26.44204 | 22.60182 | 24.62829 | 10.40979 | 8.392623 | 8.218688 | 76.55994 | 75.31747 |
| gene-AT2C  | 34.64952 | 34.49178 | 33.78038 | 67.6711  | 73.65375 | 66.22546 | 25.13216 | 28.23537 |
| gene-AT1C  | 0.523892 | 0.744011 | 0.861869 | 1.306065 | 0.759642 | 0.713133 | 1.228746 | 1.806892 |
| gene-AT4C  | 1.509854 | 1.142892 | 1.525535 | 4.465893 | 3.478227 | 4.78459  | 0.326685 | 1.081432 |
| gene-AT5C  | 3.519499 | 3.117501 | 2.900235 | 8.911445 | 8.800391 | 9.00791  | 1.002595 | 1.765335 |
| gene-AT1C  | 18.21306 | 15.26393 | 17.93237 | 12.68951 | 12.53564 | 10.62094 | 6.462017 | 7.233518 |
| gene-AT1C  | 0.792517 | 1.319635 | 0.907806 | 5.359025 | 4.27472  | 2.99679  | 0.680801 | 0.307555 |
| gene-AT5C  | 14.57215 | 14.18356 | 14.83499 | 12.67317 | 13.18866 | 13.32473 | 6.594294 | 6.254545 |
| gene-AT4C  | 14.03162 | 14.72234 | 15.24256 | 5.048199 | 4.293974 | 5.066946 | 8.277933 | 9.624402 |
| gene-AT2C  | 6.44054  | 6.143281 | 6.347292 | 7.094582 | 6.963237 | 7.05323  | 0.225726 | 0.111686 |
| gene-AT1C  | 19.1987  | 18.72606 | 18.69935 | 11.78678 | 11.00735 | 11.47873 | 28.15591 | 31.83444 |
| gene-AT1C  | 1.54131  | 2.106288 | 2.173517 | 3.566365 | 4.261358 | 4.008389 | 1.646183 | 2.390749 |
| gene-AT3C  | 1.815428 | 2.347846 | 2.435896 | 2.512777 | 1.876714 | 2.128273 | 0.968739 | 1.070349 |
| Arabidopsi | 0.675661 | 0.786491 | 0.663044 | 0.052022 | 0.211853 | 0.284573 | 1.209919 | 1.203453 |
| gene-AT1C  | 2.06583  | 1.755904 | 0.97477  | 3.587215 | 5.181289 | 4.339341 | 3.493257 | 2.619552 |
| gene-AT5C  | 15.22234 | 15.09456 | 12.64981 | 11.55763 | 11.06322 | 11.15177 | 20.21433 | 22.12439 |
| gene-AT2C  | 0.974232 | 1.110379 | 0.662503 | 1.825919 | 1.241739 | 1.740674 | 0.783506 | 0.589196 |
| gene-AT1C  | 18.79576 | 16.82046 | 19.50139 | 23.38242 | 24.04437 | 23.81234 | 6.504828 | 6.513826 |
| gene-AT3C  | 1.980828 | 2.687551 | 2.757725 | 4.359648 | 3.578666 | 4.673093 | 2.163079 | 1.850774 |
| gene-AT1C  | 1.804146 | 1.875472 | 1.131085 | 2.192057 | 1.795794 | 1.335485 | 0.419796 | 0.764174 |
| gene-AT1C  | 34.90793 | 30.52449 | 32.17979 | 22.5732  | 19.63553 | 21.48644 | 43.78519 | 38.7465  |
| gene-AT5C  | 25.14733 | 25.9548  | 26.43109 | 25.98117 | 24.15847 | 24.23606 | 36.84039 | 36.72599 |
| gene-AT3C  | 3.369528 | 3.980519 | 4.264958 | 11.57598 | 11.87079 | 10.77324 | 6.758032 | 4.932212 |
| gene-AT4C  | 6.679874 | 5.079475 | 6.095673 | 13.99347 | 14.49929 | 14.84856 | 9.722355 | 11.22673 |
| gene-AT5C  | 0.44045  | 0.264353 | 0.226565 | 0.513312 | 0.302746 | 0.431803 | 1.329168 | 1.979242 |
| gene-AT5C  | 3.40866  | 2.310276 | 2.966049 | 4.808589 | 3.869245 | 4.118597 | 1.150637 | 0.816077 |
| gene-AT4C  | 2.050195 | 2.281013 | 1.854654 | 2.81432  | 2.894026 | 2.871002 | 0.738807 | 0.518754 |
| gene-AT1C  | 37.13804 | 34.63618 | 40.16379 | 24.99211 | 26.67402 | 25.28943 | 15.10031 | 17.50262 |
| gene-AT4C  | 16.73429 | 17.52583 | 18.56192 | 13.92866 | 14.3297  | 13.92083 | 14.93594 | 15.23439 |
| gene-AT1C  | 9.326792 | 6.596582 | 9.007887 | 3.032823 | 2.997901 | 3.280299 | 15.49001 | 15.76721 |
| gene-AT4C  | 19.62691 | 17.67757 | 14.95776 | 9.882751 | 12.62193 | 9.752242 | 16.63939 | 16.51954 |
| gene-AT1C  | 9.254533 | 10.66258 | 9.002719 | 32.56339 | 33.51222 | 29.67636 | 13.79619 | 13.81793 |
| gene-AT1C  | 4.404942 | 2.927802 | 4.270479 | 4.488125 | 5.767765 | 4.433958 | 2.444776 | 2.027563 |
| gene-AT1C  | 3.307486 | 3.308342 | 4.333848 | 6.926091 | 6.217176 | 6.933436 | 1.71386  | 2.29666  |
| gene-AT1C  | 3.015715 | 1.557847 | 3.062376 | 5.069119 | 6.227686 | 4.931542 | 1.282175 | 1.341983 |
| gene-AT1C  | 0.710961 | 1.219535 | 1.225661 | 1.022908 | 1.166341 | 1.311741 | 0.435284 | 0.41414  |
| gene-AT4C  | 1.449559 | 0.736664 | 0.88616  | 1.258763 | 1.61778  | 1.016668 | 1.236071 | 0.777469 |
| gene-AT4C  | 3.780037 | 3.32426  | 2.94902  | 2.387367 | 2.301244 | 1.889704 | 1.210254 | 1.257577 |
| gene-AT5C  | 28.18464 | 29.17548 | 29.6857  | 17.87243 | 18.2565  | 16.38446 | 24.56468 | 24.59333 |
| gene-AT1C  | 0.60387  | 0.903517 | 0.63761  | 1.560593 | 1.699059 | 0.926088 | 0.177488 | 0.504737 |
| gene-AT1C  | 32.12135 | 32.95488 | 34.4633  | 21.2495  | 20.25912 | 18.22037 | 56.31147 | 54.43455 |
| gene-AT5C  | 22.2442  | 22.92327 | 24.27907 | 23.11548 | 22.8282  | 21.21664 | 23.98352 | 23.56121 |
| gene-AT5C  | 50.05848 | 46.48725 | 48.72457 | 96.90701 | 98.22019 | 98.76274 | 19.29884 | 20.52506 |

|            |          |          |          |          |          |          |          |          |
|------------|----------|----------|----------|----------|----------|----------|----------|----------|
| gene-AT4C  | 3.038849 | 1.966167 | 1.716203 | 2.139859 | 2.701438 | 1.437668 | 6.02917  | 5.367059 |
| gene-AT4C  | 5.633575 | 7.305243 | 7.184762 | 6.645056 | 6.077711 | 6.250508 | 12.16685 | 13.12898 |
| gene-AT3C  | 2.774791 | 2.500089 | 3.18602  | 3.526434 | 4.065427 | 4.048907 | 0.327234 | 1.156849 |
| gene-AT2C  | 10.47053 | 10.89095 | 10.49529 | 6.363974 | 6.285833 | 6.236262 | 13.93946 | 13.87054 |
| gene-AT5C  | 4.038264 | 3.518604 | 3.699908 | 4.321572 | 4.05163  | 4.17996  | 1.090215 | 0.976709 |
| gene-AT5C  | 10.08224 | 9.40675  | 6.262818 | 7.847449 | 7.03651  | 8.714299 | 3.360036 | 3.478489 |
| gene-AT2C  | 2.930333 | 2.684811 | 2.628784 | 3.36871  | 2.527542 | 2.417098 | 8.305124 | 8.851368 |
| gene-AT3C  | 7.405363 | 7.060421 | 8.115055 | 4.082589 | 5.352893 | 4.563995 | 10.45445 | 11.06809 |
| gene-AT5C  | 9.589468 | 11.11013 | 13.4212  | 24.94934 | 23.4677  | 23.50912 | 16.08468 | 16.92324 |
| Arabidopsi | 2.999563 | 3.430081 | 3.186606 | 6.785455 | 8.19215  | 8.190762 | 3.789236 | 3.726923 |
| gene-AT5C  | 11.79382 | 14.70394 | 14.98335 | 0.832724 | 0.830741 | 1.19147  | 8.92301  | 7.14485  |
| gene-AT2C  | 150.8551 | 148.9552 | 147.1667 | 104.6734 | 98.2478  | 101.372  | 178.9627 | 193.1914 |
| gene-AT5C  | 1.278334 | 2.440737 | 1.689527 | 1.444959 | 1.694112 | 1.6491   | 2.115822 | 2.294848 |
| gene-AT1C  | 0.545466 | 0.599061 | 0.32067  | 0.599973 | 0.568327 | 0.501729 | 1.352239 | 0.805613 |
| gene-AT4C  | 0.854986 | 0.325085 | 0.316876 | 1.098329 | 0.691853 | 0.850888 | 0.308592 | 0.688165 |
| gene-AT1C  | 14.8833  | 15.96602 | 14.93574 | 7.329456 | 9.056257 | 8.547452 | 6.511905 | 5.928787 |
| gene-AT3C  | 10.88836 | 10.88296 | 11.4229  | 10.04662 | 11.01852 | 9.909107 | 21.66088 | 22.29156 |
| gene-AT5C  | 8.131302 | 9.91886  | 7.713802 | 4.936393 | 5.725257 | 5.133086 | 7.888131 | 8.661834 |
| gene-AT2C  | 1.80915  | 1.459709 | 1.548685 | 0.632295 | 0.979627 | 1.04397  | 1.799304 | 1.581585 |
| gene-AT4C  | 27.72756 | 29.30251 | 28.25953 | 22.77786 | 27.4801  | 25.9248  | 43.87765 | 45.21333 |
| gene-AT4C  | 2.33689  | 1.433354 | 2.959951 | 2.508267 | 2.190513 | 2.040824 | 3.558406 | 3.186497 |
| gene-AT1C  | 3.780637 | 2.879474 | 5.007926 | 1.933463 | 2.034324 | 2.650503 | 2.209729 | 1.621217 |
| gene-AT3C  | 15.55015 | 17.42326 | 16.41351 | 11.36206 | 11.68479 | 11.14561 | 20.65566 | 20.2229  |
| gene-AT3C  | 1.607711 | 0.82756  | 0.592182 | 1.674545 | 0.74964  | 1.016682 | 0.206903 | 0.443398 |
| gene-AT3C  | 7.56927  | 6.630561 | 6.487104 | 14.71695 | 15.57643 | 16.46317 | 6.688034 | 6.550643 |
| gene-AT5C  | 8.204946 | 8.746295 | 7.269802 | 3.899673 | 3.731232 | 3.382994 | 3.134888 | 4.028121 |
| gene-AT5C  | 12.511   | 12.57382 | 12.29915 | 15.07937 | 13.53766 | 15.23986 | 5.642736 | 6.157376 |
| gene-AT2C  | 76.85371 | 70.15437 | 78.51617 | 53.225   | 52.90864 | 49.02225 | 115.7595 | 119.4426 |
| gene-AT5C  | 3.983398 | 4.442917 | 3.908224 | 3.450218 | 3.236539 | 3.571699 | 2.368596 | 2.061363 |
| gene-AT1C  | 6.571808 | 7.198092 | 6.433334 | 5.781288 | 6.138156 | 6.013798 | 8.141623 | 8.90723  |
| gene-AT2C  | 27.48779 | 26.31678 | 25.51085 | 7.819787 | 4.366379 | 5.391115 | 6.629811 | 7.907021 |
| gene-AT4C  | 2.307672 | 2.474619 | 2.460909 | 5.075249 | 5.344066 | 4.703425 | 0.823166 | 0.896945 |
| gene-AT5C  | 22.5403  | 20.19437 | 22.9506  | 51.17802 | 51.86022 | 51.79376 | 24.61784 | 23.75776 |
| gene-AT1C  | 14.13145 | 13.43094 | 13.48868 | 7.779441 | 7.121662 | 7.348228 | 3.05882  | 3.045726 |
| gene-AT4C  | 343.7141 | 348.0747 | 358.6909 | 270.2152 | 268.9839 | 277.5519 | 583.5247 | 513.0843 |
| gene-AT1C  | 6.018112 | 3.753626 | 4.464434 | 4.377035 | 3.867197 | 4.327252 | 8.461082 | 9.473213 |
| gene-AT1C  | 19.44806 | 20.74608 | 20.34373 | 18.71753 | 19.78198 | 19.25004 | 32.25306 | 35.38247 |
| gene-AT2C  | 6.430668 | 4.333295 | 4.510701 | 2.555332 | 2.357644 | 1.762944 | 13.97704 | 14.41177 |
| gene-AT5C  | 25.39393 | 29.81028 | 28.10225 | 22.18886 | 19.71639 | 20.11909 | 47.8901  | 46.92825 |
| gene-AT1C  | 0.906938 | 0.884962 | 0.675472 | 1.767072 | 1.588785 | 1.015218 | 0.442364 | 0.495333 |
| gene-AT3C  | 76.30372 | 75.52908 | 79.2787  | 90.30414 | 88.93838 | 89.83826 | 46.7913  | 50.39552 |
| gene-AT3C  | 192.2008 | 177.6488 | 186.7727 | 84.47335 | 81.65047 | 88.17753 | 95.25136 | 93.85519 |
| gene-AT3C  | 3.158882 | 3.552734 | 4.591614 | 3.339246 | 3.710159 | 3.014601 | 10.18529 | 10.00217 |
| gene-AT5C  | 102.5617 | 100.2938 | 99.15415 | 82.90814 | 84.31349 | 84.60121 | 107.2328 | 108.2796 |
| gene-AT3C  | 173.7365 | 179.2123 | 179.6739 | 132.3912 | 138.6277 | 140.8535 | 283.4871 | 284.8414 |
| gene-AT2C  | 5.525581 | 4.184304 | 4.473307 | 6.709659 | 6.539281 | 5.441014 | 2.612689 | 2.447686 |
| gene-AT4C  | 152.7514 | 153.1068 | 155.351  | 141.6104 | 143.9977 | 141.2965 | 255.3977 | 270.8145 |
| gene-AT4C  | 2.581496 | 2.352485 | 2.111217 | 2.403608 | 2.472875 | 2.450153 | 0.983281 | 1.068849 |
| gene-AT3C  | 2.822135 | 2.252529 | 2.840591 | 2.594618 | 2.651286 | 2.647982 | 4.101447 | 5.013094 |
| gene-AT3C  | 5.382801 | 4.669571 | 6.705769 | 6.713261 | 8.035786 | 7.970553 | 1.823111 | 1.914242 |
| gene-AT1C  | 14.12083 | 14.05186 | 14.36459 | 17.73019 | 16.11409 | 16.55065 | 4.27288  | 3.757478 |

|           |          |          |          |          |          |          |          |          |
|-----------|----------|----------|----------|----------|----------|----------|----------|----------|
| gene-AT3C | 6.116354 | 5.618865 | 5.697416 | 28.15909 | 26.4045  | 27.37724 | 2.769813 | 2.071102 |
| gene-AT3C | 273.995  | 274.3981 | 267.9045 | 159.6888 | 160.7635 | 164.4251 | 362.8459 | 371.6964 |
| gene-AT1C | 5.137359 | 4.747795 | 3.968493 | 3.052778 | 2.569008 | 2.589406 | 5.371553 | 6.912064 |
| gene-AT1C | 0.564731 | 1.068581 | 0.450956 | 1.283608 | 1.324624 | 0.919694 | 0.512571 | 0.568071 |
| gene-AT5C | 3.614238 | 3.95054  | 3.601183 | 5.933803 | 6.318559 | 6.045172 | 6.663532 | 8.19971  |
| gene-AT5C | 0.468689 | 0.397578 | 0.503933 | 1.120033 | 1.458759 | 1.237616 | 0.213082 | 0.300598 |
| gene-AT2C | 2.948884 | 2.153418 | 2.437165 | 3.107285 | 2.812451 | 4.011415 | 1.059686 | 1.072869 |
| gene-AT5C | 4.831614 | 5.322615 | 5.183956 | 2.920261 | 3.837323 | 3.094483 | 5.309615 | 5.938217 |
| gene-AT5C | 0.972159 | 1.224806 | 0.926102 | 1.751055 | 1.602946 | 1.30617  | 3.055157 | 2.722204 |
| gene-AT1C | 32.93467 | 33.63375 | 33.29899 | 23.34377 | 22.66085 | 19.75055 | 36.47952 | 35.38781 |
| gene-AT4C | 19.86428 | 19.23003 | 18.26096 | 21.27956 | 22.76835 | 23.29837 | 10.18938 | 8.985817 |
| gene-AT3C | 12.86015 | 12.87632 | 12.40141 | 7.446572 | 5.633433 | 6.589492 | 11.50821 | 10.48041 |
| gene-AT4C | 7.657629 | 7.458949 | 7.427099 | 8.8837   | 8.315801 | 9.660897 | 9.4061   | 8.380422 |
| gene-AT1C | 21.8708  | 16.62091 | 18.7828  | 23.15536 | 26.42225 | 26.1778  | 15.87561 | 15.77296 |
| gene-AT1C | 3.389096 | 3.841383 | 4.860272 | 8.514971 | 7.430668 | 8.299952 | 1.405279 | 0.555678 |
| gene-AT5C | 6.104799 | 5.097882 | 4.476111 | 225.8033 | 205.6107 | 210.2788 | 2.487082 | 3.405067 |
| gene-AT1C | 4.339644 | 3.934083 | 3.700522 | 4.389095 | 3.489152 | 4.261447 | 1.333355 | 1.707646 |
| gene-AT5C | 5.103274 | 4.705923 | 4.925973 | 4.111621 | 4.283192 | 4.390983 | 1.329889 | 1.967873 |
| gene-AT4C | 24.0488  | 21.48975 | 23.63387 | 48.31282 | 44.75909 | 43.34223 | 46.13937 | 50.84623 |
| gene-AT1C | 35.39253 | 37.46368 | 33.72772 | 7.576748 | 7.091236 | 7.793203 | 2.168289 | 2.072896 |
| gene-AT3C | 0.418823 | 0.231289 | 0.374462 | 0.671013 | 0.248561 | 0.285073 | 0.196454 | 0.034279 |
| gene-AT2C | 16.47664 | 18.59436 | 16.39376 | 19.09531 | 18.4221  | 19.67067 | 32.8366  | 35.027   |
| gene-AT4C | 7.091559 | 6.853682 | 6.899475 | 8.076228 | 8.462915 | 8.751297 | 9.579674 | 10.4092  |
| gene-AT5C | 2.730766 | 2.701412 | 2.112434 | 2.110183 | 1.239482 | 2.137351 | 5.421884 | 3.612225 |
| gene-AT4C | 0.395504 | 0.599308 | 0.783924 | 1.046705 | 1.813679 | 0.608203 | 0.117406 | 0.264622 |
| gene-AT5C | 2.962251 | 2.206277 | 1.460066 | 1.478813 | 1.215442 | 1.636317 | 1.85201  | 2.029114 |
| gene-AT1C | 0.389708 | 0.668372 | 0.407722 | 0.932507 | 1.162112 | 0.930517 | 0.258062 | 0.400864 |
| gene-AT3C | 48.20872 | 49.72952 | 48.82724 | 21.69983 | 23.04969 | 23.12373 | 56.13493 | 53.94428 |
| gene-AT2C | 35.88563 | 34.68527 | 35.13746 | 21.69941 | 20.01798 | 22.01081 | 53.17279 | 56.13117 |
| gene-AT5C | 13.27553 | 12.83475 | 13.4178  | 13.06423 | 11.53945 | 11.07266 | 10.12915 | 11.24621 |
| gene-AT1C | 5.587983 | 5.506718 | 5.130784 | 5.025033 | 5.866055 | 6.407341 | 6.691659 | 7.057548 |
| gene-AT1C | 0.97831  | 1.516604 | 0.595993 | 1.529662 | 0.655214 | 1.192867 | 0.560357 | 0.522499 |
| gene-AT5C | 37.4416  | 30.81376 | 34.362   | 27.51384 | 27.80607 | 29.31636 | 51.40601 | 50.05302 |
| gene-AT1C | 11.75763 | 11.06608 | 12.86084 | 15.94406 | 15.13261 | 14.7894  | 13.85198 | 14.54992 |
| gene-AT2C | 6.304522 | 5.583092 | 5.982865 | 10.55472 | 12.23426 | 10.85504 | 2.602639 | 2.297237 |
| gene-AT2C | 54.08975 | 48.94846 | 51.77567 | 35.3094  | 32.39361 | 34.37656 | 48.92799 | 50.16288 |
| gene-AT5C | 52.54084 | 47.53769 | 50.10066 | 59.36149 | 55.46966 | 56.74147 | 51.83739 | 53.25067 |
| gene-AT1C | 50.09651 | 51.17424 | 53.78696 | 39.08524 | 36.51314 | 37.91769 | 91.67395 | 87.57509 |
| gene-AT2C | 2.819736 | 2.255996 | 2.247114 | 3.391708 | 3.360034 | 3.043461 | 3.210236 | 3.490748 |
| gene-AT4C | 0.653996 | 0.482278 | 0.689899 | 0.292023 | 0.516916 | 0.386646 | 1.38785  | 1.411124 |
| gene-AT3C | 39.33253 | 40.52334 | 40.5639  | 78.72457 | 78.25671 | 79.21507 | 0.295708 | 0.234163 |
| gene-AT3C | 15.56303 | 13.46456 | 13.78943 | 16.74177 | 16.68876 | 15.44257 | 5.402298 | 5.816314 |
| gene-AT1C | 8.092034 | 7.225046 | 8.544801 | 10.46657 | 9.762786 | 9.457709 | 7.749815 | 7.890742 |
| gene-AT1C | 16.0616  | 16.19397 | 15.85902 | 12.46334 | 13.54553 | 12.54453 | 24.22304 | 22.97505 |
| gene-AT2C | 0.758612 | 0.835386 | 0.381293 | 0.332567 | 0.39914  | 0.579747 | 0.59579  | 0.648995 |
| gene-AT2C | 540.7496 | 520.2451 | 523.7601 | 1837.228 | 1860.377 | 1848.808 | 478.9083 | 500.5042 |
| gene-AT2C | 5.742226 | 4.73064  | 4.180922 | 9.138329 | 10.32365 | 11.37707 | 0.764567 | 1.081014 |
| gene-AT2C | 5.142929 | 4.658967 | 4.483745 | 2.370078 | 2.419076 | 2.2821   | 9.599761 | 9.561287 |
| gene-AT5C | 38.57349 | 38.73822 | 39.7038  | 29.85008 | 27.51799 | 28.5359  | 51.97404 | 50.71626 |
| gene-AT3C | 4.046395 | 2.895167 | 3.041434 | 4.461341 | 5.894313 | 5.115613 | 1.28011  | 0.923558 |
| gene-AT5C | 14.12938 | 13.19591 | 12.19947 | 9.514975 | 9.493112 | 8.263349 | 16.95658 | 18.46791 |

|           |          |          |          |          |          |          |          |          |
|-----------|----------|----------|----------|----------|----------|----------|----------|----------|
| gene-AT5C | 24.61501 | 23.83044 | 23.74726 | 24.30111 | 24.30899 | 26.22816 | 11.89744 | 12.42118 |
| gene-AT1C | 1.789396 | 2.284195 | 3.314918 | 3.085965 | 2.43106  | 3.082327 | 4.312364 | 6.066958 |
| gene-AT2C | 9.413508 | 8.715655 | 7.331084 | 12.54436 | 13.97235 | 14.72047 | 6.507156 | 5.915105 |
| gene-AT5C | 17.21945 | 14.52624 | 17.0483  | 5.573305 | 6.066484 | 5.804348 | 24.32772 | 25.2071  |
| gene-AT2C | 5.851741 | 6.063365 | 4.560472 | 0.587674 | 1.316689 | 0.557961 | 3.337001 | 3.570949 |
| gene-AT1C | 76.98638 | 72.77905 | 74.97807 | 47.22375 | 47.46808 | 47.71734 | 50.87804 | 55.11612 |
| gene-AT5C | 0.590204 | 0.791457 | 0.759845 | 24.91613 | 25.68029 | 23.0451  | 1.761398 | 1.817199 |
| gene-AT1C | 12.63013 | 11.99165 | 12.83219 | 18.73754 | 18.24759 | 17.20676 | 7.778231 | 6.845926 |
| gene-AT1C | 7.218763 | 6.042942 | 6.980628 | 3.530452 | 2.092372 | 1.8044   | 6.706276 | 4.570718 |
| gene-AT2C | 62.48018 | 69.98781 | 59.09763 | 18.29711 | 19.09579 | 21.94473 | 100.1964 | 83.79015 |
| gene-AT1C | 5.778756 | 5.456013 | 6.182854 | 5.365646 | 6.514152 | 5.386945 | 10.44632 | 8.585087 |
| gene-AT2C | 4.118238 | 3.646522 | 3.648991 | 5.621328 | 5.653856 | 5.576636 | 4.755559 | 4.231424 |
| gene-AT1C | 172.6211 | 170.5293 | 177.3707 | 97.35276 | 90.93465 | 94.24431 | 259.0989 | 265.3024 |
| gene-AT3C | 10.85724 | 8.70546  | 8.377107 | 5.147171 | 4.593797 | 5.017707 | 13.96317 | 13.66938 |
| gene-AT3C | 2.416707 | 2.789327 | 2.868518 | 3.801629 | 3.087393 | 2.337342 | 6.170818 | 5.423892 |
| gene-AT1C | 29.85764 | 27.57585 | 28.38846 | 16.59467 | 14.72156 | 17.13098 | 28.94934 | 28.67346 |
| gene-AT1C | 17.07007 | 15.06391 | 14.6157  | 17.06839 | 16.78793 | 16.8212  | 23.24618 | 19.32885 |
| gene-AT1C | 1.588158 | 1.576805 | 1.617792 | 2.53335  | 2.621682 | 2.341886 | 0.751119 | 0.934828 |
| gene-AT5C | 110.7286 | 117.8907 | 115.6359 | 81.38155 | 81.59362 | 79.1184  | 97.28408 | 103.3653 |
| gene-AT3C | 0        | 0.413941 | 0.138517 | 1.693803 | 1.760104 | 1.630373 | 0.446557 | 0.444879 |
| gene-AT3C | 0.638239 | 0.864913 | 0.585917 | 1.136825 | 0.95551  | 1.14229  | 1.847643 | 2.044949 |
| gene-AT1C | 0.936398 | 1.519512 | 1.268797 | 1.271922 | 1.530016 | 1.357812 | 0.431301 | 0.898562 |
| gene-AT5C | 10.07351 | 9.816747 | 9.23987  | 6.570178 | 5.39046  | 6.570919 | 6.011526 | 5.571505 |
| gene-AT4C | 1.14711  | 1.617383 | 1.317836 | 0.957339 | 0.727964 | 0.921667 | 0.851695 | 0.947017 |
| gene-AT4C | 16.67592 | 16.8166  | 15.84079 | 14.33394 | 13.15892 | 14.13047 | 16.35695 | 15.60161 |
| gene-AT3C | 86.64548 | 87.70574 | 84.73358 | 35.17701 | 35.66552 | 37.76491 | 135.1724 | 135.5549 |
| gene-AT4C | 432.8728 | 429.5403 | 442.1157 | 341.3665 | 331.364  | 333.4576 | 532.9772 | 556.198  |
| gene-AT3C | 8.04223  | 9.330749 | 8.041466 | 10.17221 | 10.00054 | 9.059309 | 3.65846  | 3.436479 |
| gene-AT4C | 5.178188 | 5.294584 | 5.110366 | 12.12334 | 14.27158 | 14.06479 | 1.762358 | 1.508102 |
| gene-AT1C | 87.22976 | 80.30582 | 80.25916 | 94.38145 | 95.78249 | 94.33397 | 32.21732 | 32.78361 |
| gene-AT3C | 6.222224 | 5.711492 | 6.145053 | 6.636337 | 7.092062 | 7.525059 | 3.662398 | 2.833273 |
| gene-AT5C | 48.17347 | 48.4202  | 50.85477 | 46.09187 | 42.86729 | 43.36338 | 49.37943 | 50.84306 |
| gene-AT1C | 1.118649 | 1.283911 | 1.533758 | 10.94211 | 10.35178 | 9.941382 | 2.677827 | 2.74604  |
| gene-AT4C | 7.333884 | 7.161173 | 7.99603  | 3.731401 | 4.070414 | 4.987241 | 5.273221 | 5.157355 |
| gene-AT5C | 2.593871 | 4.037657 | 2.949275 | 2.776875 | 2.743143 | 2.482143 | 2.750628 | 2.61181  |
| gene-AT3C | 60.52755 | 55.3017  | 58.93523 | 69.19234 | 71.51544 | 73.71063 | 40.29197 | 39.03708 |
| gene-AT4C | 8.994864 | 9.975842 | 10.98893 | 15.90412 | 16.5607  | 17.10426 | 0.716448 | 0.757648 |
| gene-AT1C | 28.2897  | 26.41203 | 23.26717 | 57.17606 | 54.95461 | 54.57035 | 14.82844 | 16.90574 |
| gene-AT1C | 32.68658 | 31.38331 | 31.89297 | 31.38042 | 31.28641 | 33.51244 | 18.88823 | 19.01851 |
| gene-AT3C | 70.94412 | 71.67337 | 71.73602 | 42.57922 | 41.79208 | 42.55054 | 128.5823 | 133.2029 |
| gene-AT3C | 17.57398 | 17.88128 | 17.92363 | 31.32087 | 29.31579 | 29.03651 | 18.13115 | 19.59437 |
| gene-AT5C | 1.165017 | 1.552052 | 2.079342 | 1.060268 | 1.398189 | 0.933411 | 2.65254  | 2.725897 |
| gene-AT3C | 90.845   | 92.16863 | 87.72186 | 122.8906 | 125.5435 | 124.8704 | 31.86075 | 31.16686 |
| gene-AT5C | 0.075998 | 0.113517 | 0.023561 | 0.28529  | 0.233677 | 0.299713 | 0.021346 | 0.038108 |
| gene-AT5C | 2.932755 | 2.397385 | 2.275867 | 4.948343 | 5.764915 | 7.041213 | 0.68366  | 1.632603 |
| gene-AT5C | 110.9671 | 110.5273 | 114.6054 | 121.0797 | 125.6797 | 121.0563 | 137.1177 | 147.8489 |
| gene-AT3C | 10.88214 | 10.24845 | 10.00187 | 7.878719 | 7.498675 | 7.167951 | 15.89082 | 15.78838 |
| gene-AT2C | 4.562035 | 5.718887 | 5.322876 | 5.040121 | 4.995495 | 4.659893 | 3.033369 | 3.225867 |
| gene-AT2C | 14.34649 | 11.25855 | 11.80051 | 9.884494 | 9.646208 | 9.412506 | 4.0709   | 4.604991 |
| gene-AT2C | 3.869186 | 4.418356 | 4.303672 | 7.356362 | 7.932579 | 6.47105  | 12.31593 | 11.74535 |
| gene-AT4C | 7.880688 | 8.492674 | 8.506419 | 9.918882 | 12.54428 | 11.38667 | 5.693016 | 5.362778 |

|           |          |          |          |          |          |          |          |          |
|-----------|----------|----------|----------|----------|----------|----------|----------|----------|
| gene-AT4C | 37.08149 | 36.43549 | 38.56911 | 12.33221 | 9.987429 | 12.13077 | 8.742036 | 7.643434 |
| gene-AT3C | 4.232481 | 3.284901 | 4.355373 | 5.38586  | 5.018965 | 6.758725 | 1.576172 | 1.016303 |
| gene-AT5C | 9.711538 | 9.9322   | 10.04865 | 4.706918 | 4.17499  | 4.381528 | 10.38592 | 10.45207 |
| gene-AT1C | 1.700518 | 1.734275 | 1.87373  | 0.929649 | 1.373484 | 1.365053 | 0.64388  | 0.637327 |
| gene-AT3C | 1.396752 | 1.694151 | 1.656736 | 1.708913 | 2.669645 | 2.789619 | 3.871808 | 4.526163 |
| gene-AT1C | 1.159463 | 0.173681 | 0.599378 | 0.275594 | 0.743449 | 1.171618 | 0.477476 | 0.195266 |
| gene-AT1C | 60.14956 | 67.54204 | 66.12261 | 80.67902 | 79.46023 | 81.78998 | 57.69848 | 59.29731 |
| gene-AT4C | 0.919774 | 0.746601 | 1.126075 | 0.438791 | 0.403742 | 0.465872 | 1.675922 | 1.096003 |
| gene-AT1C | 7.204955 | 6.38933  | 6.099541 | 7.54678  | 8.828301 | 7.304441 | 8.019377 | 8.217775 |
| gene-AT2C | 335.0742 | 324.6067 | 340.0654 | 234.1955 | 235.6252 | 236.7364 | 554.377  | 548.0767 |
| gene-AT5C | 10.26138 | 9.580059 | 10.14946 | 13.51017 | 13.05762 | 14.61759 | 4.126729 | 4.344448 |
| gene-AT2C | 8.126135 | 9.477847 | 7.915123 | 13.01392 | 14.24132 | 14.12645 | 5.15999  | 6.70176  |
| gene-AT2C | 11.24272 | 9.945325 | 11.86933 | 6.405513 | 6.176501 | 6.608747 | 14.90822 | 16.52559 |
| gene-AT2C | 2.18301  | 1.901609 | 2.282602 | 1.218589 | 1.075555 | 1.228889 | 2.148875 | 2.843717 |
| gene-AT3C | 4.074038 | 4.128875 | 4.341053 | 5.686003 | 4.071612 | 5.668325 | 7.578644 | 6.640643 |
| gene-AT4C | 46.02949 | 46.77243 | 45.95106 | 28.14387 | 26.70042 | 24.61672 | 53.12265 | 57.81403 |
| gene-AT2C | 5.250886 | 4.68352  | 4.386734 | 11.72922 | 13.20697 | 11.33764 | 1.9706   | 1.539824 |
| gene-AT3C | 1.723495 | 1.984938 | 2.067156 | 3.557974 | 3.256577 | 4.021686 | 2.307427 | 2.099696 |
| gene-AT5C | 44.40908 | 42.32566 | 46.69602 | 27.60313 | 25.94398 | 25.83627 | 73.57613 | 68.65404 |
| gene-AT2C | 49.38266 | 52.31468 | 47.83672 | 13.41975 | 14.70902 | 13.61826 | 14.43565 | 16.54684 |
| gene-AT2C | 39.33028 | 42.0351  | 40.81856 | 56.65343 | 56.4808  | 56.35863 | 25.6971  | 29.75831 |
| gene-AT1C | 0.24491  | 0.108597 | 0.233666 | 1.408585 | 1.276098 | 1.268441 | 0.608689 | 0.649088 |
| gene-AT4C | 12.14713 | 11.71892 | 12.80307 | 8.864438 | 9.905982 | 10.48192 | 25.91985 | 23.07919 |
| gene-AT4C | 0.88714  | 0.704161 | 1.014131 | 0.562916 | 0.621755 | 0.398009 | 0.190947 | 0.062632 |
| gene-AT5C | 2.422798 | 2.550357 | 2.653411 | 1.539518 | 2.34079  | 2.327877 | 3.748316 | 3.301948 |
| gene-AT1C | 15.55018 | 15.87608 | 14.55836 | 26.42906 | 27.89079 | 26.0298  | 1.955214 | 0.958873 |
| gene-AT5C | 1.697719 | 1.36883  | 1.047817 | 1.065726 | 1.149603 | 0.811972 | 2.148522 | 1.950226 |
| gene-AT5C | 0.743981 | 1.449225 | 0.79414  | 0        | 0.197413 | 0.395774 | 2.43878  | 2.444387 |
| gene-AT5C | 110.8556 | 103.0406 | 111.3487 | 75.48848 | 73.5066  | 69.22107 | 162.7214 | 165.4974 |
| gene-AT5C | 164.3595 | 138.5073 | 169.5593 | 77.03434 | 66.72713 | 75.65728 | 32.51473 | 29.48156 |
| gene-AT1C | 146.4804 | 144.5919 | 144.8121 | 99.58386 | 102.4755 | 92.999   | 209.2251 | 211.7097 |
| gene-AT3C | 38.66112 | 38.83909 | 37.71574 | 29.65405 | 28.36563 | 30.28844 | 52.13638 | 58.37132 |
| gene-AT1C | 14.299   | 12.07744 | 10.39323 | 16.75405 | 17.12174 | 17.14486 | 11.00771 | 12.52459 |
| gene-AT2C | 4.379135 | 4.505173 | 4.484759 | 5.211201 | 4.813443 | 4.054366 | 5.282828 | 5.500336 |
| gene-AT3C | 11.94788 | 10.68798 | 11.17086 | 10.08896 | 11.26902 | 10.45702 | 2.59141  | 2.154857 |
| gene-AT1C | 0.145334 | 0.150388 | 0.086967 | 0.370227 | 0.255096 | 0.369494 | 0.298321 | 0.172915 |
| gene-AT1C | 3.406114 | 3.795607 | 3.924645 | 7.867821 | 7.946496 | 7.590425 | 4.48992  | 4.04354  |
| gene-AT5C | 37.19858 | 37.38646 | 37.46523 | 23.68207 | 24.05128 | 24.77973 | 3.478185 | 4.252077 |
| gene-AT5C | 2.33863  | 2.402009 | 2.808136 | 3.243453 | 3.562028 | 3.005309 | 1.107899 | 1.193912 |
| gene-AT5C | 0.980776 | 0.817054 | 0.868236 | 0.869948 | 1.103313 | 1.172756 | 1.635735 | 1.558646 |
| gene-AT5C | 2.62762  | 3.316889 | 2.736973 | 1.683893 | 1.852082 | 1.19979  | 0.396658 | 0.586978 |
| gene-AT3C | 18.75311 | 18.62688 | 19.21367 | 12.6787  | 9.184108 | 14.4899  | 30.06047 | 28.67419 |
| gene-AT4C | 1473.061 | 1441.763 | 1490.195 | 845.9037 | 845.4506 | 852.7562 | 2303.361 | 2307.054 |
| gene-AT1C | 0.256326 | 0.27676  | 0.428789 | 1.675467 | 1.258755 | 1.838711 | 0.280775 | 0.512015 |
| gene-AT4C | 0.822737 | 0.649045 | 1.023802 | 1.340342 | 1.181091 | 1.635374 | 0.743882 | 0.659024 |
| gene-AT4C | 5.979844 | 5.212455 | 5.152175 | 5.376135 | 4.093085 | 5.309312 | 2.507355 | 2.39668  |
| gene-AT5C | 33.09409 | 36.40402 | 34.60079 | 39.63457 | 39.01652 | 39.32964 | 20.24216 | 19.89331 |
| gene-AT1C | 3.553368 | 3.803378 | 4.069476 | 9.879252 | 9.619508 | 9.281664 | 4.356232 | 4.745156 |
| gene-AT3C | 7.822404 | 8.194617 | 7.611683 | 8.157019 | 8.247246 | 8.152778 | 4.811784 | 4.709818 |
| gene-AT5C | 0.635308 | 0.312554 | 0.54203  | 0.691805 | 0.593739 | 0.491311 | 0.317644 | 0.32255  |
| gene-AT3C | 28.61085 | 28.53285 | 29.42882 | 39.51632 | 40.93559 | 35.2541  | 33.53794 | 36.32254 |

|            |          |          |          |          |          |          |          |          |
|------------|----------|----------|----------|----------|----------|----------|----------|----------|
| gene-AT1C  | 3.671215 | 3.096339 | 3.419044 | 91.51302 | 86.42569 | 90.4509  | 2.570618 | 1.516526 |
| gene-AT2C  | 7.247746 | 6.866742 | 5.856706 | 10.79717 | 9.518473 | 11.58453 | 2.31416  | 2.287134 |
| gene-AT4C  | 43.4053  | 41.27001 | 43.07694 | 27.91172 | 30.66977 | 28.17011 | 65.97608 | 68.77068 |
| gene-AT5C  | 7.617251 | 7.584439 | 7.092816 | 4.878916 | 4.473884 | 4.837654 | 9.146529 | 9.119151 |
| gene-AT5C  | 7.460419 | 7.989598 | 6.857305 | 3.051785 | 3.576288 | 4.1946   | 9.339314 | 7.867779 |
| gene-AT1C  | 26.88011 | 26.36835 | 24.60032 | 12.21293 | 12.25159 | 12.17119 | 13.91305 | 15.52765 |
| gene-AT3C  | 13.00972 | 11.8774  | 13.90197 | 11.27273 | 9.766742 | 9.834623 | 18.74231 | 17.62083 |
| gene-AT3C  | 1.311703 | 1.008329 | 1.356859 | 0.491929 | 0.568819 | 0.263437 | 1.450687 | 1.562059 |
| gene-AT5C  | 5.8387   | 4.558564 | 5.577985 | 6.091373 | 6.393869 | 6.55602  | 1.377983 | 1.703098 |
| gene-AT3C  | 21.40896 | 19.0486  | 17.55234 | 17.38318 | 15.56293 | 18.41447 | 28.27816 | 22.94066 |
| gene-AT5C  | 0.590936 | 0.81056  | 0.507994 | 1.003478 | 0.603553 | 0.703057 | 0.883109 | 0.841977 |
| gene-AT4C  | 2.785856 | 4.020332 | 2.951567 | 50.8051  | 52.22372 | 50.62764 | 1.13071  | 1.042154 |
| gene-AT4C  | 1.756925 | 1.439163 | 1.690247 | 1.419004 | 1.89724  | 1.213503 | 0.662315 | 0.780282 |
| gene-AT4C  | 8.728523 | 9.299655 | 8.684131 | 7.351557 | 9.007684 | 8.118426 | 12.85194 | 13.24031 |
| gene-AT1C  | 0.058546 | 0.107607 | 0.10898  | 0.365358 | 0.480978 | 0.465778 | 0.378318 | 0.075566 |
| gene-AT5C  | 2.650027 | 2.607796 | 2.836162 | 1.553091 | 1.938603 | 2.316464 | 3.812273 | 3.229788 |
| gene-AT5C  | 1.848974 | 2.260949 | 2.582497 | 2.36624  | 2.872303 | 2.241705 | 1.476185 | 1.871726 |
| gene-AT3C  | 24.91783 | 26.4391  | 27.03427 | 34.37183 | 35.85622 | 36.64335 | 4.532182 | 4.503256 |
| gene-AT1C  | 3.496632 | 3.515638 | 3.212579 | 1.811816 | 2.075125 | 2.301595 | 1.215096 | 1.760291 |
| gene-AT2C  | 2.920734 | 3.222437 | 2.800419 | 5.442019 | 5.977491 | 5.760336 | 4.212032 | 6.003734 |
| gene-AT4C  | 117.1877 | 117.8123 | 119.1399 | 84.04128 | 83.90075 | 83.84686 | 178.5916 | 182.4249 |
| gene-AT2C  | 3.93365  | 5.535564 | 4.593008 | 6.53871  | 4.686863 | 5.66875  | 2.66891  | 3.518262 |
| gene-AT4C  | 4.200386 | 4.247204 | 4.286483 | 3.750678 | 4.895775 | 4.741495 | 3.653232 | 4.730227 |
| gene-AT2C  | 20.18644 | 20.3479  | 19.91649 | 21.06665 | 19.22609 | 19.44504 | 15.39676 | 18.33795 |
| gene-AT2C  | 449.1534 | 369.6495 | 437.0094 | 203.5422 | 214.5855 | 223.4552 | 755.2605 | 779.7211 |
| gene-AT1C  | 34.24028 | 35.91314 | 29.45053 | 16.22703 | 16.1745  | 15.54144 | 67.31577 | 69.89416 |
| gene-AT1C  | 2.972807 | 2.214461 | 3.076337 | 1.70917  | 2.118698 | 1.747181 | 2.457861 | 2.435747 |
| gene-AT2C  | 2.019179 | 2.229569 | 2.376617 | 2.014118 | 1.894266 | 2.801515 | 3.188401 | 2.137743 |
| gene-AT2C  | 51.02413 | 47.21761 | 46.38381 | 22.18861 | 19.82217 | 18.45556 | 18.6482  | 21.75549 |
| gene-AT3C  | 151.9541 | 151.0956 | 150.832  | 70.97718 | 70.98338 | 71.22266 | 113.3902 | 117.9667 |
| gene-AT2C  | 2.611744 | 2.407773 | 2.470401 | 16.62435 | 18.06962 | 14.55988 | 0.324147 | 0.370779 |
| gene-AT5C  | 27.91965 | 25.98959 | 26.2399  | 10.30979 | 10.82124 | 10.5111  | 8.532991 | 8.061932 |
| Arabidopsi | 1.43629  | 1.252444 | 0.678019 | 1.3577   | 1.740157 | 0.976232 | 1.247667 | 1.436629 |
| gene-AT1C  | 4.36725  | 3.007257 | 4.225743 | 24.27625 | 22.75977 | 24.41357 | 1.83565  | 1.2747   |
| gene-AT1C  | 93.00451 | 88.9335  | 90.09875 | 125.9346 | 121.6657 | 122.1348 | 47.66638 | 49.33799 |
| gene-AT3C  | 7.902481 | 7.139674 | 6.530824 | 13.92416 | 13.11986 | 13.12018 | 2.182896 | 1.675709 |
| Arabidopsi | 2.51925  | 2.080593 | 2.447649 | 8.840501 | 8.541549 | 7.788786 | 1.254457 | 1.180796 |
| gene-AT2C  | 6.347411 | 5.774651 | 5.238722 | 3.17631  | 3.821045 | 5.116631 | 10.10232 | 10.27318 |
| gene-AT1C  | 19.27517 | 20.28133 | 21.26362 | 9.564356 | 9.625766 | 9.586755 | 5.614365 | 6.132736 |
| gene-AT2C  | 20.08137 | 19.02743 | 18.54143 | 15.2878  | 13.40706 | 14.30194 | 29.22698 | 34.22446 |
| gene-AT2C  | 20.4296  | 18.64953 | 19.1536  | 20.94071 | 20.77634 | 20.03065 | 8.306191 | 9.346003 |
| gene-AT5C  | 3.6467   | 3.109404 | 3.430774 | 2.294109 | 2.755239 | 2.394212 | 0.867699 | 0.997036 |
| gene-AT3C  | 6.751678 | 7.70109  | 6.96093  | 9.379373 | 8.215501 | 8.480926 | 6.093121 | 6.355467 |
| gene-AT4C  | 5.776035 | 5.945552 | 6.669876 | 2.105209 | 1.771401 | 1.409089 | 2.237066 | 1.482122 |
| gene-AT5C  | 48.72091 | 49.36136 | 50.39601 | 50.54293 | 48.52247 | 48.12788 | 77.61063 | 80.59298 |
| gene-AT1C  | 16.38692 | 16.00769 | 16.23476 | 10.89558 | 11.41123 | 11.92069 | 26.12023 | 25.81735 |
| gene-AT1C  | 103.5989 | 102.3886 | 99.30325 | 144.4611 | 149.2479 | 146.9957 | 101.9803 | 105.8923 |
| gene-AT1C  | 90.35156 | 90.29964 | 86.81072 | 91.25829 | 91.4854  | 91.03469 | 38.65631 | 34.64168 |
| gene-AT5C  | 12.11528 | 10.66859 | 9.464739 | 12.85422 | 16.59622 | 14.83862 | 3.09049  | 3.696485 |
| gene-AT1C  | 34.7959  | 32.47428 | 34.64495 | 22.78352 | 22.97777 | 25.36289 | 48.11538 | 49.5293  |
| gene-AT4C  | 41.19848 | 38.41291 | 38.27093 | 82.50201 | 79.69202 | 81.69756 | 26.34072 | 28.56849 |

|           |          |          |          |          |          |          |          |          |
|-----------|----------|----------|----------|----------|----------|----------|----------|----------|
| gene-AT3C | 1.823299 | 2.823772 | 2.841871 | 0.788149 | 0.943815 | 0.923467 | 1.148812 | 1.312747 |
| gene-AT5C | 10.52831 | 9.916653 | 9.154857 | 10.33443 | 10.09105 | 10.18621 | 4.281095 | 3.634942 |
| gene-AT2C | 0.872574 | 0.875401 | 0.588759 | 0.728959 | 0.632568 | 0.745701 | 0.670697 | 0.569108 |
| gene-AT2C | 1.910885 | 1.667492 | 1.820127 | 3.31322  | 3.240234 | 2.175819 | 0.716801 | 0.463341 |
| gene-AT1C | 0.711509 | 0.895718 | 0.569903 | 1.695166 | 1.929517 | 2.552011 | 0.332707 | 0.557261 |
| gene-AT1C | 1.085658 | 0.0666   | 0.096803 | 1.492011 | 2.039151 | 1.743101 | 0.977747 | 0.194126 |
| gene-AT1C | 2.777626 | 3.288937 | 3.586388 | 5.9143   | 5.593734 | 5.899963 | 1.357622 | 1.622247 |
| gene-AT4C | 5.341291 | 4.216991 | 5.042554 | 6.179929 | 6.063367 | 7.177033 | 5.36998  | 6.407395 |
| gene-AT4C | 8.466447 | 8.975234 | 9.364416 | 19.33448 | 20.16003 | 19.8918  | 7.914626 | 7.521563 |
| gene-AT3C | 7.881147 | 6.812297 | 8.382082 | 5.757996 | 6.911126 | 5.969381 | 9.603541 | 10.04347 |
| gene-AT1C | 3.142011 | 1.561829 | 3.146294 | 4.078909 | 4.77564  | 4.617702 | 5.12966  | 6.415974 |
| gene-AT5C | 68.96527 | 73.02581 | 71.69356 | 49.12427 | 50.5903  | 44.37101 | 136.4919 | 134.1194 |
| gene-AT2C | 748.9479 | 789.1719 | 743.6162 | 319.8854 | 337.3125 | 336.4664 | 920.2755 | 873.2124 |
| gene-AT2C | 11.62399 | 11.99622 | 12.26755 | 3.671756 | 3.930058 | 4.014998 | 20.61001 | 21.73345 |
| gene-AT5C | 0.63579  | 0.326365 | 0.358066 | 0.447101 | 0.440485 | 0.498531 | 1.001029 | 1.648812 |
| gene-AT1C | 7.227758 | 9.706418 | 11.01094 | 3.566796 | 4.44629  | 3.918859 | 27.7855  | 27.68087 |
| gene-AT1C | 1.828308 | 1.740768 | 1.837541 | 0.512917 | 0.528735 | 0.282449 | 16.87305 | 16.61123 |
| gene-AT5C | 33.48577 | 30.1576  | 33.33241 | 8.693776 | 8.576487 | 8.50594  | 78.38165 | 82.15895 |
| gene-AT1C | 5.877043 | 5.566317 | 6.293604 | 10.0672  | 9.33812  | 9.657077 | 2.330647 | 0.959546 |
| gene-AT3C | 283.7573 | 291.8572 | 286.9895 | 183.899  | 184.5144 | 193.4731 | 204.2544 | 200.3297 |
| gene-AT1C | 22.03472 | 22.55588 | 21.90485 | 15.21051 | 13.90365 | 13.37664 | 9.295696 | 8.202692 |
| gene-AT3C | 23.50395 | 23.39871 | 25.10933 | 16.29044 | 14.51102 | 15.69495 | 28.77341 | 34.14073 |
| gene-AT3C | 52.89861 | 45.03893 | 44.78646 | 25.88562 | 28.56938 | 29.58765 | 83.94404 | 82.39637 |
| gene-AT3C | 2.070481 | 4.584563 | 4.407009 | 1.482442 | 0.815748 | 1.164706 | 4.961522 | 5.138395 |
| gene-AT4C | 4.410627 | 5.130415 | 5.48631  | 6.025266 | 4.898696 | 4.129778 | 5.77935  | 7.595096 |
| gene-AT1C | 6.862423 | 9.111574 | 9.218977 | 2.783643 | 3.737853 | 3.506532 | 5.048353 | 6.347056 |
| gene-AT1C | 84.52808 | 87.50919 | 83.31147 | 38.26032 | 39.6818  | 40.92158 | 72.7515  | 78.7056  |
| gene-AT2C | 6.758166 | 6.668149 | 6.361045 | 6.469113 | 5.587456 | 5.575137 | 6.077905 | 6.474233 |
| gene-AT1C | 3.666057 | 3.759139 | 3.977476 | 1.934178 | 1.409962 | 1.739045 | 3.43305  | 4.118986 |
| gene-AT4C | 1.126748 | 1.134762 | 1.282441 | 0.602357 | 0.936557 | 0.705447 | 1.526698 | 1.469151 |
| gene-AT5C | 102.3991 | 100.1893 | 101.9169 | 49.31004 | 47.11504 | 46.40324 | 60.65055 | 65.10684 |
| gene-AT1C | 6.111213 | 6.924893 | 6.814812 | 2.594229 | 3.223684 | 3.476553 | 7.641635 | 8.796835 |
| gene-AT1C | 4.027223 | 4.449605 | 4.131046 | 4.340942 | 3.936694 | 3.551633 | 1.491109 | 1.517804 |
| gene-AT1C | 2.79885  | 3.671894 | 2.575528 | 4.762815 | 3.627604 | 4.062438 | 2.051892 | 1.637559 |
| gene-AT2C | 12.55176 | 11.94416 | 12.36203 | 6.688447 | 6.645594 | 6.779208 | 2.008428 | 2.375867 |
| gene-AT3C | 1.602874 | 1.313362 | 1.927686 | 2.049587 | 2.265509 | 1.928153 | 1.442879 | 1.100404 |
| gene-AT1C | 25.63474 | 28.34733 | 27.62853 | 5.862687 | 5.805209 | 5.670891 | 4.514343 | 4.180206 |
| gene-AT3C | 10.28488 | 8.971873 | 9.888609 | 26.49582 | 29.41715 | 26.89309 | 11.09832 | 9.793142 |
| gene-AT1C | 10.3852  | 11.91841 | 10.25302 | 7.393666 | 7.359277 | 8.771439 | 26.6616  | 25.21215 |
| gene-AT3C | 11.96669 | 13.59181 | 12.46193 | 42.66559 | 39.0983  | 36.80384 | 2.839213 | 2.469763 |
| gene-AT1C | 36.78358 | 36.05968 | 34.01175 | 25.13298 | 26.9018  | 24.27205 | 26.02411 | 30.7065  |
| gene-AT1C | 1.623094 | 2.14388  | 1.789137 | 0.808384 | 0.929647 | 0.64951  | 0.60861  | 0.380353 |
| gene-AT5C | 6.259629 | 7.846443 | 5.7886   | 8.245306 | 7.43208  | 6.001351 | 4.368001 | 4.309129 |
| gene-AT5C | 21.47451 | 22.37534 | 20.31033 | 25.99921 | 24.34171 | 27.80194 | 20.58355 | 17.4101  |
| gene-AT2C | 0.381742 | 0.355885 | 0.379536 | 1.16619  | 0.615118 | 0.475828 | 0.166741 | 0.28132  |
| gene-AT1C | 28.57865 | 30.94324 | 27.80577 | 56.73856 | 50.84006 | 54.7021  | 8.363327 | 9.291881 |
| gene-AT3C | 1.911179 | 1.598101 | 1.31555  | 3.407897 | 2.932781 | 2.377849 | 0        | 0        |
| gene-AT2C | 8.523818 | 8.870452 | 9.176194 | 9.85633  | 10.47925 | 8.549212 | 4.344477 | 4.11803  |
| gene-AT5C | 3.559669 | 3.18807  | 3.84241  | 5.957684 | 5.740926 | 4.939265 | 0.894233 | 0.953147 |
| gene-AT2C | 2.55523  | 2.78347  | 2.147616 | 0.695488 | 0.434445 | 0.664644 | 0.315136 | 0.467937 |
| gene-AT1C | 59.71394 | 60.50394 | 57.64301 | 167.5748 | 165.7964 | 155.7282 | 33.83486 | 36.78751 |



|           |          |          |          |          |          |          |          |          |
|-----------|----------|----------|----------|----------|----------|----------|----------|----------|
| gene-AT4C | 5.28612  | 4.697417 | 5.584062 | 6.288289 | 6.073937 | 5.992136 | 5.433012 | 6.956676 |
| gene-AT3C | 1.87634  | 1.722893 | 1.755257 | 1.081888 | 1.081034 | 0.512979 | 2.307648 | 2.231662 |
| gene-AT4C | 311.2997 | 311.3343 | 302.5682 | 133.3826 | 139.0152 | 131.5624 | 202.8558 | 212.7884 |
| gene-AT2C | 294.8413 | 293.1518 | 302.8581 | 381.8838 | 376.1531 | 377.9749 | 442.3425 | 465.3873 |
| gene-AT2C | 3.53124  | 2.443501 | 1.354088 | 0.473897 | 0.153578 | 0.176967 | 6.824801 | 5.200764 |
| gene-AT1C | 43.55051 | 44.81735 | 40.6819  | 34.00259 | 35.45323 | 29.54019 | 59.05368 | 67.47111 |
| gene-AT5C | 1.711315 | 2.200258 | 2.246503 | 1.378584 | 1.151945 | 1.276345 | 1.907766 | 2.37476  |
| gene-AT5C | 2.342683 | 2.388115 | 3.264832 | 0.781151 | 1.201363 | 1.135152 | 0.281784 | 0.285447 |
| gene-AT5C | 5.847774 | 5.631344 | 6.83237  | 11.11147 | 10.4486  | 9.506138 | 3.3209   | 3.666082 |
| gene-AT1C | 15.33019 | 15.42743 | 14.89433 | 6.598728 | 7.614531 | 6.193453 | 23.40783 | 27.18168 |
| gene-AT5C | 1.786034 | 1.542264 | 1.650858 | 1.161843 | 1.212049 | 1.467578 | 0.707207 | 0.846699 |
| gene-AT2C | 56.06106 | 56.04541 | 58.87841 | 95.88146 | 95.99042 | 94.46883 | 68.60083 | 76.80669 |
| gene-AT1C | 639.1522 | 640.0832 | 516.6779 | 412.1162 | 412.3155 | 373.2769 | 846.6095 | 917.5134 |
| gene-AT5C | 1.139197 | 0.99729  | 0.765069 | 1.327019 | 0.922849 | 0.986319 | 1.006709 | 0.879832 |
| gene-AT5C | 1.85605  | 1.704155 | 1.537406 | 4.521344 | 3.851718 | 4.551405 | 3.904045 | 4.205093 |
| gene-AT1C | 2.285427 | 2.217406 | 1.802627 | 2.662734 | 1.857086 | 1.954168 | 0.934313 | 0.76422  |
| gene-AT4C | 10.27954 | 10.51395 | 8.555169 | 16.36207 | 15.524   | 15.29641 | 5.935503 | 7.512372 |
| gene-AT1C | 38.09151 | 35.4071  | 37.70816 | 38.77919 | 35.08106 | 37.24964 | 24.40725 | 23.29677 |
| gene-AT1C | 0.415284 | 0.436754 | 0.578484 | 0.430141 | 0.588658 | 0.574806 | 1.626994 | 0.95419  |
| gene-AT3C | 18.07458 | 16.58589 | 16.70407 | 4.870269 | 5.288646 | 4.383297 | 8.529991 | 8.802005 |
| gene-AT1C | 5.245049 | 5.402235 | 5.417694 | 5.237877 | 4.6732   | 4.444879 | 5.972565 | 6.26232  |
| gene-AT2C | 45.40805 | 44.45025 | 45.50087 | 13.58728 | 14.7512  | 13.66902 | 12.99176 | 18.28324 |
| gene-AT2C | 37.0033  | 40.29873 | 41.60366 | 28.85745 | 28.43016 | 28.22464 | 62.69681 | 62.1762  |
| gene-AT1C | 1.821813 | 1.583971 | 1.410937 | 1.458977 | 1.325119 | 1.628792 | 0.537266 | 0.491856 |
| gene-AT3C | 6.27454  | 6.059785 | 6.490784 | 27.99093 | 29.51184 | 28.93861 | 2.807116 | 2.990779 |
| gene-AT3C | 2.450315 | 2.087736 | 2.165228 | 1.144763 | 1.086603 | 0.816229 | 4.488682 | 3.318353 |
| gene-AT4C | 6.837707 | 7.706655 | 7.251828 | 7.191195 | 5.34896  | 6.820733 | 9.536785 | 12.76339 |
| gene-AT4C | 0.260557 | 0.268818 | 0.900102 | 0.532332 | 0.752075 | 0.554927 | 2.599079 | 1.714673 |
| gene-AT4C | 7.710888 | 7.537161 | 7.554344 | 13.00538 | 12.45702 | 12.20674 | 2.76994  | 2.633168 |
| gene-AT2C | 31.21595 | 29.6107  | 32.2442  | 60.22694 | 60.40964 | 55.57826 | 18.80752 | 18.5455  |
| gene-AT4C | 10.93833 | 11.57143 | 10.32862 | 6.509289 | 5.936896 | 5.931619 | 5.592236 | 4.105421 |
| gene-AT5C | 1.024491 | 1.637233 | 1.435354 | 3.415855 | 3.319261 | 2.465164 | 1.678829 | 1.39049  |
| gene-AT1C | 12.43831 | 10.79122 | 12.09465 | 12.36572 | 12.32068 | 12.20977 | 18.5511  | 18.14321 |
| gene-AT5C | 5.584156 | 5.068281 | 3.479264 | 2.369507 | 2.274366 | 1.938444 | 0.591209 | 1.225932 |
| gene-AT4C | 11.61067 | 12.0415  | 12.0085  | 10.58438 | 9.885115 | 9.537927 | 2.875854 | 3.104654 |
| gene-AT1C | 14.74266 | 13.51615 | 15.95221 | 9.735414 | 9.86099  | 9.216472 | 26.0759  | 26.69444 |
| gene-AT2C | 11.66712 | 10.75862 | 12.37279 | 7.109169 | 7.176394 | 6.711536 | 4.382492 | 4.375806 |
| gene-AT5C | 17.83659 | 16.10548 | 15.19303 | 101.8322 | 101.679  | 110.2361 | 13.96602 | 12.08512 |
| gene-AT1C | 13.45713 | 11.51325 | 12.45595 | 17.71651 | 23.36859 | 22.88022 | 9.010368 | 10.80119 |
| gene-AT5C | 1.10752  | 1.528754 | 1.715971 | 4.42926  | 3.516779 | 3.313864 | 1.599584 | 0.766323 |
| gene-AT2C | 0.497149 | 0.694588 | 0.397966 | 0.506437 | 0.533225 | 0.53069  | 0.388612 | 0.381997 |
| gene-AT5C | 58.22789 | 58.20085 | 62.25273 | 47.24639 | 48.82029 | 45.31363 | 87.61233 | 90.33519 |
| gene-AT1C | 2.176276 | 2.510248 | 2.812539 | 1.296366 | 2.296787 | 1.492382 | 0.761129 | 0.599432 |
| gene-AT1C | 4.292549 | 4.600583 | 4.178973 | 5.833074 | 7.316705 | 6.277039 | 3.187822 | 2.87933  |
| gene-AT5C | 23.18445 | 23.64934 | 21.7847  | 21.73197 | 21.48018 | 21.91111 | 41.14618 | 41.86713 |
| gene-AT4C | 16.52802 | 17.36614 | 17.38545 | 11.46922 | 12.09355 | 11.78634 | 34.54239 | 38.18431 |
| gene-AT5C | 48.71576 | 50.30013 | 49.76096 | 99.47742 | 94.14027 | 94.994   | 47.50942 | 50.81306 |
| gene-AT1C | 3.635537 | 4.348656 | 5.413747 | 1.991946 | 2.498326 | 1.887408 | 0        | 0        |
| gene-AT3C | 7.574266 | 7.3707   | 7.376811 | 7.241128 | 7.20338  | 7.139084 | 8.795971 | 9.552037 |
| gene-AT3C | 27.43543 | 27.78044 | 30.7608  | 9.309065 | 8.804165 | 9.00096  | 5.865942 | 6.417559 |
| gene-AT3C | 1.833347 | 1.612645 | 0.825001 | 0.851311 | 0.815134 | 1.878989 | 0.387726 | 0.591411 |

|           |          |          |          |          |          |          |          |          |
|-----------|----------|----------|----------|----------|----------|----------|----------|----------|
| gene-AT3C | 68.14966 | 75.85054 | 70.46373 | 41.95019 | 37.46024 | 39.10438 | 61.43298 | 63.0481  |
| gene-AT3C | 25.86298 | 26.12017 | 24.44909 | 48.72189 | 50.79389 | 49.76352 | 4.083497 | 4.747933 |
| gene-AT1C | 1.492905 | 1.564222 | 0.77364  | 1.144141 | 1.177114 | 1.025928 | 0.09121  | 0.205715 |
| gene-AT5C | 186.5183 | 182.7292 | 197.401  | 9.167559 | 8.426332 | 9.443512 | 12.11224 | 11.63444 |
| gene-AT1C | 18.2503  | 18.68465 | 20.66986 | 15.33896 | 16.29655 | 15.88489 | 30.06808 | 28.35336 |
| gene-AT3C | 10.37267 | 11.83681 | 9.834504 | 8.339876 | 9.858769 | 8.70339  | 16.86185 | 17.10262 |
| gene-AT5C | 11.23868 | 10.54451 | 10.25473 | 26.27734 | 26.76217 | 25.38369 | 14.52836 | 15.02301 |
| gene-AT4C | 1.398782 | 2.442538 | 1.902483 | 2.746922 | 2.484112 | 1.841349 | 1.679647 | 1.913489 |
| gene-AT1C | 358.0379 | 357.6225 | 354.3483 | 171.0396 | 178.3549 | 172.2012 | 634.6805 | 673.9341 |
| gene-AT3C | 4.405273 | 4.458411 | 4.519042 | 7.031066 | 6.735689 | 5.996344 | 13.9436  | 12.9882  |
| gene-AT3C | 8.56201  | 8.255166 | 9.361482 | 8.422042 | 8.881678 | 6.371851 | 6.078247 | 6.006697 |
| gene-AT5C | 2.196023 | 1.043499 | 1.50667  | 4.949346 | 4.97865  | 4.554075 | 3.12399  | 2.697999 |
| gene-AT5C | 44.64296 | 47.43026 | 43.23395 | 132.6319 | 137.0131 | 133.5647 | 48.86114 | 45.50033 |
| gene-AT3C | 20.41523 | 21.28158 | 20.36702 | 19.09185 | 17.87249 | 16.32458 | 4.205632 | 4.944498 |
| gene-AT5C | 3.808161 | 3.290676 | 3.66231  | 3.605958 | 3.776002 | 3.175317 | 2.983495 | 2.230595 |
| gene-AT1C | 19.04147 | 18.22454 | 19.91717 | 27.22144 | 25.54884 | 25.9057  | 22.96017 | 22.39321 |
| gene-AT1C | 26.74955 | 23.01733 | 27.00295 | 11.5208  | 11.38207 | 11.07967 | 47.58737 | 43.98481 |
| gene-AT3C | 4.368051 | 4.144736 | 3.76535  | 1.619147 | 1.70099  | 1.305516 | 5.063262 | 4.980822 |
| gene-AT3C | 3.658657 | 3.586034 | 4.291424 | 4.696552 | 4.506836 | 4.986609 | 5.016468 | 4.682358 |
| gene-AT1C | 0.931522 | 1.2068   | 0.957163 | 1.439545 | 1.621434 | 1.421446 | 0.447578 | 0.327443 |
| gene-AT4C | 6.636118 | 8.988969 | 12.46918 | 7.45188  | 7.385855 | 8.277349 | 11.94617 | 10.30198 |
| gene-AT5C | 32.78967 | 36.77447 | 38.49194 | 28.03007 | 25.81422 | 26.20617 | 44.66319 | 46.98399 |
| gene-AT1C | 16.53791 | 16.52725 | 17.14466 | 13.97792 | 15.19523 | 13.21009 | 22.22122 | 23.14453 |
| gene-AT1C | 7.386563 | 6.623266 | 8.535028 | 8.946138 | 9.62711  | 7.32429  | 20.0572  | 22.26605 |
| gene-AT2C | 0.77536  | 0.779293 | 1.42436  | 1.956824 | 2.340735 | 2.272979 | 0.174462 | 0.506351 |
| gene-AT1C | 3.665493 | 3.534414 | 4.241831 | 3.942456 | 3.162163 | 3.068293 | 11.12501 | 12.58963 |
| gene-AT2C | 9.181028 | 9.689194 | 10.4415  | 5.764683 | 5.599011 | 4.793924 | 12.28291 | 12.71052 |
| gene-AT5C | 4.329535 | 3.991674 | 3.804992 | 3.73388  | 3.771996 | 4.330698 | 4.962147 | 4.538573 |
| gene-AT2C | 2.675734 | 2.875705 | 2.828121 | 1.51083  | 1.896304 | 1.749855 | 5.576096 | 6.293189 |
| gene-AT2C | 1.398942 | 1.412039 | 1.513874 | 1.304653 | 1.513371 | 1.180467 | 1.864317 | 1.395869 |
| gene-AT3C | 8.493886 | 10.73088 | 9.387797 | 12.3597  | 13.02307 | 12.68156 | 7.05375  | 9.150835 |
| gene-AT1C | 0.832651 | 0.903026 | 1.181528 | 2.554464 | 2.365531 | 2.575455 | 0.379486 | 0.303745 |
| gene-AT3C | 5.499873 | 4.715594 | 4.612929 | 4.681764 | 4.351344 | 4.902932 | 0.908668 | 0.906951 |
| gene-AT2C | 4.199458 | 4.197754 | 4.759009 | 4.97891  | 3.771664 | 4.415396 | 7.088697 | 8.610038 |
| gene-AT5C | 1.377174 | 2.033104 | 1.663768 | 0.680032 | 0.638136 | 0.732931 | 3.107985 | 3.725165 |
| gene-AT1C | 1.510629 | 1.10473  | 1.490645 | 0        | 0        | 0        | 0        | 0        |
| gene-AT3C | 5.811942 | 5.83925  | 6.308224 | 5.936252 | 6.362216 | 5.73834  | 5.313434 | 5.80558  |
| gene-AT2C | 1.583415 | 1.602862 | 1.337914 | 43.52912 | 44.77031 | 45.83401 | 2.964041 | 2.847974 |
| gene-AT4C | 8.79161  | 11.05776 | 9.217631 | 1.063076 | 0.904835 | 1.445435 | 17.56758 | 17.15084 |
| gene-AT2C | 251.22   | 269.4844 | 267.5873 | 177.4404 | 182.0273 | 181.0625 | 402.1385 | 362.7326 |
| gene-AT3C | 6.550962 | 7.038551 | 6.996589 | 14.8422  | 13.84761 | 13.28226 | 18.90446 | 18.69879 |
| gene-AT1C | 0.845558 | 0.990283 | 0.867463 | 1.247594 | 1.266925 | 1.114889 | 0.401304 | 0.256947 |
| gene-AT1C | 19.96115 | 19.21648 | 21.22847 | 6.137495 | 6.662554 | 5.884792 | 27.09215 | 29.25372 |
| gene-AT1C | 9.000126 | 9.216136 | 10.84304 | 6.440502 | 6.891738 | 7.059126 | 17.02378 | 17.80883 |
| gene-AT3C | 7.379214 | 7.443941 | 8.789073 | 2.538168 | 4.22545  | 3.491072 | 11.34679 | 9.865147 |
| gene-AT2C | 22.10838 | 20.50218 | 21.82089 | 14.21573 | 15.02428 | 14.73168 | 5.35562  | 5.795266 |
| gene-AT1C | 102.5301 | 94.819   | 96.7741  | 70.28268 | 73.48302 | 83.25026 | 172.5629 | 181.8608 |
| gene-AT1C | 1.818756 | 1.773383 | 1.888879 | 0.608683 | 0.605519 | 0.573305 | 3.606604 | 3.262181 |
| gene-AT1C | 11.81533 | 13.19318 | 11.78954 | 8.864122 | 9.002224 | 9.866361 | 2.323877 | 3.109251 |
| gene-AT5C | 0.608857 | 0.534631 | 1.08587  | 1.433477 | 2.049385 | 2.1647   | 0.147348 | 0.894629 |
| gene-AT2C | 22.08626 | 22.05313 | 22.30271 | 47.19755 | 50.65514 | 45.00473 | 16.19682 | 20.99136 |

|           |          |          |          |          |          |          |          |          |
|-----------|----------|----------|----------|----------|----------|----------|----------|----------|
| gene-AT5C | 2.804765 | 2.165554 | 2.127121 | 3.696836 | 4.196469 | 4.681336 | 1.285322 | 0.883549 |
| gene-AT4C | 4.757339 | 6.323234 | 7.303816 | 13.89586 | 13.99257 | 10.32587 | 2.55131  | 1.919593 |
| gene-AT4C | 526.6654 | 516.6989 | 531.6837 | 395.7303 | 397.2003 | 393.6087 | 512.4797 | 528.6299 |
| gene-AT5C | 23.35378 | 21.36883 | 24.94694 | 14.34159 | 13.57014 | 12.64268 | 40.88895 | 41.91526 |
| gene-AT1C | 0.990506 | 1.144848 | 0.854358 | 1.321883 | 1.447783 | 0.886837 | 2.136246 | 1.976384 |
| gene-AT1C | 3.497416 | 3.813449 | 3.29149  | 3.025945 | 3.625087 | 3.639223 | 3.55316  | 3.050435 |
| gene-AT2C | 61.03033 | 60.28709 | 62.53678 | 40.35952 | 40.73318 | 38.33177 | 117.2666 | 117.3232 |
| gene-AT5C | 32.17996 | 34.38849 | 33.32435 | 22.6391  | 21.58064 | 20.29467 | 57.41566 | 57.17086 |
| gene-AT4C | 53.32532 | 51.02046 | 52.35081 | 61.90299 | 62.67204 | 61.23732 | 17.96011 | 20.49872 |
| gene-AT3C | 2.466502 | 2.444237 | 3.996775 | 2.545698 | 2.643334 | 3.446846 | 0.271334 | 0.043853 |
| gene-AT3C | 5.420576 | 5.411121 | 5.63994  | 4.234285 | 3.408756 | 4.368723 | 1.896415 | 2.382305 |
| gene-AT2C | 4.661329 | 4.948903 | 4.756511 | 2.220077 | 2.553368 | 2.254098 | 0.588444 | 1.082495 |
| gene-AT5C | 48.45814 | 48.82793 | 52.21091 | 35.16205 | 37.82253 | 36.48488 | 73.93955 | 72.06281 |
| gene-AT3C | 21.30472 | 20.43145 | 23.55159 | 14.49132 | 16.1922  | 14.97439 | 28.89758 | 25.86648 |
| gene-AT3C | 3.278624 | 2.484735 | 2.608043 | 3.519668 | 3.387933 | 3.712251 | 0.763176 | 0.595023 |
| gene-AT2C | 2.437242 | 2.155127 | 2.02984  | 2.493629 | 2.069164 | 1.998435 | 2.902156 | 2.831746 |
| gene-AT5C | 1.11338  | 1.187554 | 1.915662 | 0.806065 | 0.807479 | 0.576463 | 3.85437  | 4.11144  |
| gene-AT4C | 2.934154 | 3.662677 | 3.629818 | 1.371042 | 1.277755 | 1.099381 | 0.227868 | 0.252193 |
| gene-AT5C | 278.0728 | 282.5749 | 271.4088 | 103.9655 | 104.2897 | 101.7571 | 499.293  | 521.8724 |
| gene-AT4C | 8.420425 | 8.323981 | 8.460389 | 3.235426 | 4.180536 | 3.564025 | 3.160235 | 2.893539 |
| gene-AT1C | 9.151087 | 10.74238 | 9.723598 | 3.629231 | 4.97344  | 3.987712 | 20.0186  | 21.87642 |
| gene-AT3C | 0.246936 | 0.227341 | 0.288487 | 0.343188 | 0.223204 | 0.145596 | 1.392817 | 1.638045 |
| gene-AT3C | 2.666182 | 2.576135 | 2.763692 | 5.437967 | 4.347874 | 5.09379  | 0.990452 | 2.334561 |
| gene-AT3C | 0.584145 | 0.573213 | 0.526648 | 1.021568 | 1.185866 | 0.663276 | 0.227351 | 0.349624 |
| gene-AT1C | 1.678403 | 2.411858 | 2.709449 | 4.016362 | 4.410092 | 5.119004 | 0.984302 | 1.29663  |
| gene-AT5C | 57.02982 | 56.36451 | 55.65579 | 75.88007 | 76.49065 | 75.90416 | 34.85076 | 32.99091 |
| gene-AT4C | 32.96475 | 29.01997 | 33.22599 | 41.37263 | 38.97676 | 39.94685 | 26.58747 | 24.31027 |
| gene-AT4C | 2.354797 | 3.343431 | 2.550238 | 1.682041 | 2.009088 | 1.592815 | 4.547019 | 4.315704 |
| gene-AT4C | 0.31014  | 0.565826 | 0.396088 | 0.319647 | 0.502522 | 0.192099 | 0.888982 | 1.194249 |
| gene-AT4C | 27.04082 | 24.95306 | 25.04717 | 42.60723 | 40.84441 | 39.76504 | 17.90615 | 19.43859 |
| gene-AT5C | 26.99591 | 22.97908 | 25.60507 | 19.55311 | 23.65098 | 21.93727 | 8.583423 | 7.788497 |
| gene-AT2C | 1.948134 | 1.905257 | 2.030967 | 2.935259 | 3.553805 | 2.318926 | 4.094617 | 3.922135 |
| gene-AT2C | 2.638625 | 3.515766 | 2.531365 | 8.790914 | 7.390575 | 8.93737  | 6.101709 | 4.86517  |
| gene-AT1C | 48.21795 | 39.87938 | 44.89912 | 33.9691  | 36.02047 | 33.41313 | 67.89537 | 70.12698 |
| gene-AT3C | 12.77052 | 12.90337 | 11.55359 | 6.129288 | 6.35035  | 6.881912 | 20.24301 | 21.38116 |
| gene-AT3C | 11.4855  | 11.29991 | 12.09896 | 15.90703 | 17.15268 | 15.33346 | 8.808711 | 9.239597 |
| gene-AT3C | 20.30964 | 18.99784 | 20.86751 | 15.21354 | 15.82552 | 15.04758 | 22.48961 | 23.44102 |
| gene-AT4C | 23.91797 | 23.64772 | 21.88331 | 37.72932 | 38.87726 | 39.47153 | 14.62911 | 15.08609 |
| gene-AT2C | 0.304746 | 0.319442 | 0.150667 | 0.540331 | 0.336443 | 0.535237 | 0.450238 | 0.406097 |
| gene-AT2C | 7.502744 | 7.279133 | 8.408679 | 6.47711  | 7.799544 | 7.998944 | 9.965373 | 11.18968 |
| gene-AT2C | 30.06125 | 28.95158 | 30.31885 | 21.23789 | 23.82308 | 20.79314 | 21.64701 | 22.62976 |
| gene-AT2C | 17.15216 | 16.61466 | 16.61731 | 14.4619  | 14.42341 | 15.86662 | 6.758177 | 6.241152 |
| gene-AT1C | 0.979931 | 1.183615 | 0.931783 | 2.65823  | 2.765441 | 2.971308 | 0.507309 | 1.093108 |
| gene-AT4C | 73.4989  | 68.33717 | 73.61916 | 77.96138 | 78.60368 | 79.16264 | 67.69508 | 72.22167 |
| gene-AT3C | 5.924448 | 7.443211 | 6.882755 | 11.13139 | 10.41174 | 10.7434  | 2.301548 | 1.72409  |
| gene-AT5C | 8.908882 | 9.275226 | 9.363666 | 10.75573 | 8.728976 | 8.384564 | 3.674371 | 4.380796 |
| gene-AT3C | 46.20348 | 44.69182 | 47.48819 | 28.46176 | 30.08843 | 29.81735 | 12.23557 | 12.30226 |
| gene-AT4C | 6.406165 | 4.679281 | 6.294309 | 13.75717 | 14.2502  | 13.10354 | 7.885185 | 9.630856 |
| gene-AT1C | 154.0805 | 155.1572 | 158.4078 | 87.32161 | 80.82427 | 79.50721 | 246.315  | 247.9957 |
| gene-AT2C | 404.2138 | 446.8809 | 379.3514 | 361.9718 | 402.359  | 413.3219 | 41.21927 | 38.62354 |
| gene-AT1C | 2.442393 | 1.645539 | 2.69478  | 0.899676 | 0.361084 | 0.437017 | 0        | 0        |

|           |          |          |          |          |          |          |          |          |
|-----------|----------|----------|----------|----------|----------|----------|----------|----------|
| gene-AT2C | 0.543183 | 0.25305  | 0.26135  | 0.820288 | 0.905547 | 0.76557  | 0.585045 | 1.100706 |
| gene-AT1C | 5.224696 | 4.749148 | 5.480914 | 4.202078 | 3.312663 | 3.425744 | 13.95344 | 13.4725  |
| gene-AT5C | 1.602831 | 1.246233 | 2.338979 | 1.079425 | 0.719525 | 0.456138 | 5.746787 | 4.468904 |
| gene-AT1C | 1.219615 | 1.394775 | 0.910908 | 2.255349 | 1.405588 | 2.223102 | 0.107489 | 0.085853 |
| gene-AT3C | 14.2181  | 15.41754 | 15.22508 | 15.26153 | 15.46468 | 13.76443 | 8.386776 | 8.45095  |
| gene-AT1C | 0.428455 | 0.188982 | 0.530606 | 1.085877 | 1.473288 | 1.971544 | 0.213171 | 0.510979 |
| gene-AT5C | 33.65336 | 32.66113 | 33.83159 | 55.25148 | 57.29451 | 57.57312 | 15.79598 | 17.85373 |
| gene-AT4C | 2.403449 | 2.099958 | 2.171578 | 3.127341 | 2.844503 | 3.839983 | 0.619102 | 1.054165 |
| gene-AT1C | 1.107586 | 0.249776 | 0.615539 | 2.000727 | 1.376878 | 2.095502 | 0.562624 | 1.392139 |
| gene-AT3C | 1.129375 | 0.89356  | 1.449    | 0.348254 | 0.399916 | 0.3584   | 0.451595 | 0.318454 |
| gene-AT5C | 7.850382 | 6.774969 | 8.347492 | 6.635056 | 5.755054 | 5.387856 | 13.57822 | 14.08329 |
| gene-AT5C | 7.646905 | 7.8408   | 5.915417 | 9.413004 | 9.698237 | 7.512867 | 2.472825 | 3.430953 |
| gene-AT3C | 10.748   | 10.2375  | 9.841023 | 6.675679 | 6.01732  | 7.485038 | 16.1176  | 15.07142 |
| gene-AT1C | 661.7947 | 641.7875 | 658.9004 | 262.3568 | 268.5538 | 253.9838 | 385.269  | 385.2376 |
| gene-AT3C | 4.128647 | 3.344791 | 3.505463 | 1.444931 | 1.002127 | 1.088011 | 1.433602 | 1.768209 |
| gene-AT5C | 1.732809 | 1.568514 | 2.105134 | 3.029241 | 2.884604 | 2.273902 | 2.644802 | 2.999882 |
| gene-AT1C | 31.83599 | 31.9648  | 35.46288 | 74.0483  | 72.65218 | 72.05174 | 22.77187 | 22.41291 |
| gene-AT2C | 2.602067 | 2.170954 | 3.792672 | 3.889325 | 3.531959 | 3.000423 | 4.553032 | 4.74349  |
| gene-AT1C | 16.38172 | 15.6389  | 15.65051 | 10.28925 | 10.96716 | 10.35232 | 19.77106 | 20.0266  |
| gene-AT4C | 5.222324 | 5.961464 | 7.577459 | 3.600537 | 4.692773 | 4.157237 | 8.988554 | 8.534035 |
| gene-AT3C | 1.313418 | 1.626974 | 1.382347 | 0.116182 | 0.086409 | 0.187618 | 0.124069 | 0.148875 |
| gene-AT5C | 0.55882  | 0.461649 | 1.014312 | 0.815454 | 1.350641 | 1.215183 | 0.906231 | 1.000153 |
| gene-AT5C | 26.14854 | 26.00571 | 24.18485 | 6.800402 | 7.492425 | 8.085823 | 18.60329 | 18.40302 |
| gene-AT4C | 0.526692 | 0.380407 | 0.668014 | 0.216368 | 0.079033 | 0.314851 | 0.35092  | 0.480032 |
| gene-AT1C | 12.52601 | 12.34616 | 12.9551  | 16.0555  | 17.12465 | 15.71422 | 6.633887 | 8.607464 |
| gene-AT3C | 2.928588 | 2.138057 | 2.296014 | 5.225294 | 5.495875 | 6.015585 | 3.073739 | 2.942025 |
| gene-AT5C | 67.14325 | 70.27027 | 69.17071 | 47.55559 | 52.27136 | 45.58272 | 121.395  | 128.4416 |
| gene-AT1C | 0.321695 | 0.353412 | 0.340641 | 0.406433 | 0.188865 | 0.41437  | 1.107459 | 0.861613 |
| gene-AT1C | 105.8006 | 108.4829 | 99.61454 | 9.805028 | 11.59796 | 8.853711 | 9.629856 | 9.008038 |
| gene-AT1C | 13.90139 | 15.87019 | 14.38347 | 4.364069 | 4.87649  | 5.495215 | 12.46967 | 10.77831 |
| gene-AT1C | 52.19521 | 51.04104 | 51.93688 | 32.19694 | 34.72267 | 34.76981 | 83.62023 | 86.84032 |
| gene-AT1C | 3.179655 | 3.292306 | 2.865026 | 4.12674  | 3.914536 | 3.493776 | 5.266167 | 4.552264 |
| gene-AT4C | 11.74365 | 11.19357 | 10.21487 | 9.152448 | 11.60201 | 8.289097 | 17.61016 | 21.74215 |
| gene-AT2C | 14.97235 | 13.56607 | 14.08451 | 11.18271 | 12.11699 | 12.03055 | 16.13711 | 15.2651  |
| gene-AT4C | 6.890335 | 6.94665  | 7.093148 | 11.62754 | 11.55736 | 10.35658 | 3.624023 | 3.535123 |
| gene-AT3C | 2.135801 | 1.589304 | 2.529892 | 5.293594 | 5.207041 | 5.298219 | 0.377279 | 0.437058 |
| gene-AT1C | 7.089517 | 7.183355 | 6.546219 | 9.5851   | 8.473476 | 8.253502 | 8.768511 | 9.924241 |
| gene-AT5C | 23.75211 | 23.22087 | 22.37224 | 15.99192 | 17.91456 | 14.74517 | 31.32667 | 31.54507 |
| gene-AT5C | 3.081552 | 4.031871 | 3.887309 | 7.497291 | 7.029857 | 6.853548 | 2.912384 | 3.070738 |
| gene-AT3C | 1.621424 | 0.680215 | 1.425789 | 2.767244 | 1.829306 | 2.133944 | 0.266863 | 0.340029 |
| gene-AT1C | 34.83053 | 35.22177 | 39.5932  | 22.69058 | 26.88612 | 23.05612 | 55.95341 | 55.42776 |
| gene-AT1C | 98.58372 | 98.72524 | 102.3543 | 30.85647 | 27.85635 | 31.71623 | 24.16729 | 25.28205 |
| gene-AT4C | 0.659199 | 0.622756 | 0.156672 | 0.3642   | 0.295329 | 0.643212 | 0.114084 | 0.06118  |
| gene-AT2C | 8.212467 | 9.047133 | 6.957045 | 5.853193 | 5.778899 | 5.58614  | 16.58456 | 14.30013 |
| gene-AT1C | 7.655481 | 6.759586 | 7.423789 | 5.239404 | 5.494184 | 4.018901 | 7.95501  | 7.53964  |
| gene-AT3C | 3.926889 | 5.493345 | 4.249172 | 6.747074 | 5.125121 | 6.235084 | 4.366008 | 3.580903 |
| gene-AT2C | 15.75941 | 17.52238 | 14.70361 | 15.52471 | 16.1541  | 16.41875 | 6.284536 | 5.57856  |
| gene-AT1C | 1.148723 | 0.766002 | 0.779191 | 2.101138 | 1.17036  | 1.786005 | 0.532882 | 0.602793 |
| gene-AT2C | 5.962801 | 6.657228 | 6.269449 | 15.0702  | 16.76016 | 15.02565 | 21.32323 | 19.39737 |
| gene-AT5C | 0.171686 | 0.452708 | 0.270453 | 0.57014  | 0.781586 | 1.099103 | 0.365998 | 0.236872 |
| gene-AT1C | 9.075577 | 9.026442 | 9.293373 | 4.93013  | 6.082669 | 6.097624 | 12.06104 | 14.47881 |

|            |          |          |          |          |          |          |          |          |
|------------|----------|----------|----------|----------|----------|----------|----------|----------|
| gene-AT4C  | 4.210229 | 4.826251 | 4.031673 | 2.407251 | 2.59178  | 2.301039 | 0.400078 | 0.141702 |
| gene-AT2C  | 0        | 0        | 0.184136 | 0.136868 | 0.196179 | 0.523489 | 0.162455 | 0        |
| gene-AT3C  | 0.241705 | 0        | 0.223223 | 3.741944 | 3.407152 | 3.018495 | 0.074501 | 0.244347 |
| gene-AT5C  | 12.80887 | 11.40667 | 14.01965 | 7.434579 | 7.410961 | 8.111667 | 15.87895 | 18.04559 |
| gene-AT5C  | 20.71835 | 21.77839 | 22.44278 | 10.5587  | 10.76497 | 10.12623 | 5.457354 | 4.655426 |
| gene-AT5C  | 11.25571 | 11.39255 | 10.74219 | 91.53476 | 90.72797 | 92.01432 | 20.19431 | 20.34841 |
| Arabidopsi | 1.314482 | 2.69309  | 3.000035 | 4.282679 | 3.48669  | 4.595697 | 4.898051 | 4.00938  |
| gene-AT3C  | 64.94859 | 63.83674 | 64.30451 | 50.41229 | 48.80563 | 50.26176 | 84.67944 | 86.55882 |
| gene-AT5C  | 10.22335 | 9.483276 | 9.553494 | 9.684972 | 11.40358 | 9.82637  | 33.55222 | 34.72222 |
| gene-AT2C  | 3.623586 | 4.454109 | 4.331852 | 5.437692 | 4.492318 | 5.050018 | 1.4869   | 2.674481 |
| gene-AT1C  | 2.246108 | 1.892598 | 1.657943 | 2.126132 | 1.587424 | 1.775025 | 0.563702 | 0.273255 |
| gene-AT3C  | 4.305857 | 4.107155 | 4.494436 | 2.279944 | 2.95973  | 2.95428  | 1.536883 | 1.760591 |
| gene-AT1C  | 3.772952 | 6.888309 | 7.983974 | 7.406098 | 10.1457  | 8.961042 | 4.232057 | 2.437436 |
| gene-AT3C  | 15.39383 | 12.94162 | 14.42511 | 6.110353 | 4.613158 | 6.821711 | 0.058597 | 0.25053  |
| gene-AT1C  | 7.006307 | 6.005392 | 6.071786 | 6.939175 | 7.626969 | 7.239943 | 19.10641 | 19.61533 |
| gene-AT5C  | 65.45274 | 65.72988 | 64.75376 | 55.28971 | 53.83422 | 51.37455 | 85.80014 | 88.75863 |
| gene-AT1C  | 16.80919 | 16.44518 | 17.49404 | 9.782833 | 11.84349 | 11.3511  | 8.226574 | 8.11133  |
| gene-AT4C  | 84.87755 | 77.12485 | 74.15465 | 100.954  | 105.1135 | 101.319  | 99.1124  | 93.46469 |
| gene-AT1C  | 0.189648 | 0.136239 | 0.329974 | 0.414822 | 0.762588 | 0.73882  | 0.076881 | 0        |
| gene-AT4C  | 42.75542 | 44.26913 | 43.91029 | 80.12829 | 82.01771 | 74.47789 | 56.02269 | 49.4836  |
| gene-AT1C  | 15.41318 | 13.08022 | 14.49076 | 10.11309 | 9.529664 | 10.34482 | 16.49583 | 16.558   |
| gene-AT3C  | 1.409612 | 0.796644 | 0.806049 | 1.288768 | 0.977098 | 0.945214 | 1.093037 | 1.125394 |
| gene-AT4C  | 11.96444 | 11.76215 | 14.68694 | 6.564947 | 6.033505 | 5.870676 | 16.56826 | 16.84871 |
| gene-AT2C  | 6.389214 | 5.516158 | 7.004684 | 6.431097 | 7.370113 | 7.421081 | 15.0573  | 15.89809 |
| gene-AT4C  | 1.484689 | 1.813955 | 2.030684 | 4.112245 | 4.005206 | 3.785529 | 1.150679 | 1.423923 |
| gene-AT2C  | 388.231  | 378.1927 | 379.6572 | 193.6742 | 187.3743 | 193.3968 | 259.8649 | 277.8883 |
| gene-AT4C  | 31.62221 | 31.23053 | 33.36355 | 45.19619 | 44.23151 | 48.41743 | 31.66162 | 37.51616 |
| gene-AT4C  | 130.7166 | 125.3761 | 129.3875 | 200.9277 | 196.8027 | 191.7621 | 72.92687 | 70.98177 |
| gene-AT4C  | 17.85945 | 18.58949 | 18.33181 | 6.339962 | 7.962464 | 6.964946 | 17.94756 | 16.97498 |
| gene-AT2C  | 0.710932 | 0.981557 | 0.812275 | 1.994449 | 1.259655 | 0.920693 | 0.236648 | 0.856724 |
| gene-AT4C  | 22.3378  | 23.42741 | 23.50331 | 22.87983 | 18.9473  | 21.64351 | 33.44499 | 34.1388  |
| gene-AT4C  | 4.426823 | 4.970457 | 5.236162 | 4.98187  | 5.50052  | 4.867953 | 5.448677 | 5.20841  |
| gene-AT3C  | 5.361635 | 5.174444 | 5.295082 | 8.69921  | 8.358238 | 8.659013 | 8.840093 | 9.662726 |
| gene-AT2C  | 24.66722 | 22.89199 | 25.52281 | 22.03229 | 20.40228 | 21.7797  | 10.27656 | 11.55703 |
| gene-AT5C  | 17.2414  | 17.08099 | 16.77336 | 19.09607 | 18.53325 | 18.50636 | 2.873588 | 3.424922 |
| gene-AT1C  | 49.11414 | 49.92512 | 52.85558 | 27.10882 | 27.54183 | 27.35212 | 60.46254 | 62.02024 |
| gene-AT1C  | 9.832072 | 8.204192 | 10.25529 | 6.786528 | 7.066644 | 5.583496 | 25.86585 | 30.56281 |
| gene-AT1C  | 11.24557 | 11.3676  | 9.887348 | 7.687235 | 8.521314 | 8.21138  | 16.10942 | 18.20041 |
| gene-AT1C  | 1.259179 | 0.819485 | 0.826371 | 3.356479 | 4.779885 | 4.696501 | 0.356359 | 0.89696  |
| gene-AT5C  | 23.61168 | 23.635   | 29.87956 | 57.94386 | 62.90305 | 59.05075 | 47.77898 | 49.46436 |
| gene-AT1C  | 8.473422 | 9.231824 | 8.664632 | 6.205768 | 6.649969 | 6.638799 | 15.68101 | 16.22334 |
| gene-AT3C  | 20.09434 | 19.05718 | 18.65342 | 7.289818 | 9.163773 | 5.991558 | 10.60633 | 9.082512 |
| gene-AT4C  | 21.22101 | 20.65616 | 22.87027 | 58.3452  | 57.9319  | 58.85544 | 23.70872 | 26.9763  |
| gene-AT3C  | 2.130939 | 2.041499 | 0.396742 | 2.690022 | 3.18398  | 1.326869 | 0.244346 | 1.257176 |
| gene-AT1C  | 1464.049 | 1412.953 | 1467.506 | 797.5025 | 794.2423 | 813.8904 | 1819.514 | 1805.278 |
| gene-AT5C  | 139.1238 | 141.8401 | 141.9733 | 109.0867 | 112.4036 | 110.5628 | 250.7181 | 263.0358 |
| gene-AT1C  | 1.10851  | 0.485194 | 0.579955 | 0.310334 | 0.367068 | 0.127925 | 1.157225 | 1.657503 |
| gene-AT3C  | 4.759279 | 4.605157 | 5.188    | 6.168981 | 6.765274 | 5.524314 | 6.425234 | 6.213938 |
| gene-AT1C  | 9.229288 | 8.93546  | 8.412365 | 9.069455 | 10.91804 | 10.30765 | 6.555935 | 5.738771 |
| gene-AT1C  | 1.885569 | 2.306763 | 2.438117 | 3.751537 | 2.806894 | 2.729406 | 2.858471 | 2.486085 |
| gene-AT3C  | 2.506088 | 2.799813 | 2.948866 | 4.748524 | 5.25037  | 4.790135 | 1.378013 | 1.292217 |

|           |          |          |          |          |          |          |          |          |
|-----------|----------|----------|----------|----------|----------|----------|----------|----------|
| gene-AT5C | 1.174362 | 1.395092 | 1.138454 | 2.513488 | 2.313745 | 2.921998 | 0.225378 | 0.456394 |
| gene-AT5C | 171.7282 | 182.2267 | 179.9048 | 136.4264 | 138.8967 | 133.146  | 243.0582 | 248.6303 |
| gene-AT1C | 1.111296 | 1.011836 | 1.126376 | 0.661088 | 0.858432 | 0.488155 | 0.525065 | 0.477119 |
| gene-AT3C | 24.26671 | 27.55096 | 28.37043 | 27.39377 | 25.27565 | 23.8507  | 50.44477 | 49.24672 |
| gene-AT1C | 75.50501 | 74.03938 | 79.64596 | 41.71446 | 41.61432 | 42.32798 | 31.76331 | 34.06428 |
| gene-AT1C | 23.09954 | 22.2654  | 24.40862 | 22.41571 | 19.80138 | 20.86596 | 28.89679 | 31.60958 |
| gene-AT3C | 9.052774 | 8.354371 | 9.24929  | 8.385142 | 7.585299 | 10.31325 | 7.871532 | 8.621247 |
| gene-AT2C | 1.972408 | 2.084037 | 1.772255 | 1.682158 | 1.84621  | 1.744908 | 1.419516 | 0.889487 |
| gene-AT1C | 37.70292 | 35.95477 | 36.47334 | 41.71879 | 41.97829 | 43.06658 | 26.61678 | 30.70399 |
| gene-AT5C | 1.545188 | 1.510409 | 1.775509 | 3.285117 | 3.494576 | 3.753176 | 1.342743 | 1.543906 |
| gene-AT3C | 33.68926 | 30.99176 | 29.89353 | 34.82795 | 32.10759 | 33.00188 | 49.35921 | 52.62469 |
| gene-AT1C | 50.67538 | 47.96112 | 49.21667 | 92.68439 | 89.70461 | 87.64367 | 19.67101 | 18.36258 |
| gene-AT1C | 37.09849 | 34.4557  | 38.23757 | 33.19455 | 29.93106 | 31.57974 | 60.42533 | 57.37901 |
| gene-AT1C | 1.233762 | 1.124582 | 1.049463 | 1.549169 | 0.35154  | 0.667836 | 0.460232 | 0.156702 |
| gene-AT1C | 31.50509 | 28.73371 | 29.28123 | 20.20684 | 15.72926 | 16.45919 | 9.294597 | 10.74075 |
| gene-AT3C | 2.635834 | 2.481159 | 2.186941 | 4.238276 | 2.443031 | 2.566791 | 1.145246 | 0.785283 |
| gene-AT3C | 11.56828 | 11.93842 | 11.76834 | 15.02974 | 14.35578 | 15.14216 | 10.49994 | 11.95197 |
| gene-AT3C | 19.26243 | 19.97291 | 19.97037 | 3.108497 | 3.082692 | 3.051919 | 2.004915 | 1.751603 |
| gene-AT3C | 1.097979 | 0.720366 | 0.770673 | 0.850111 | 0.728134 | 0.918476 | 0.309121 | 0.352373 |
| gene-AT2C | 66.99103 | 67.86749 | 63.74554 | 118.2319 | 120.754  | 121.7867 | 136.536  | 137.7857 |
| gene-AT4C | 5.087145 | 4.623821 | 5.771467 | 1.906339 | 3.620006 | 2.873108 | 1.476184 | 1.072743 |
| gene-AT2C | 8.920609 | 9.73587  | 7.957366 | 3.664893 | 3.623056 | 3.102546 | 1.776057 | 1.394977 |
| gene-AT4C | 43.10159 | 45.20299 | 41.12694 | 18.3955  | 18.17574 | 19.31346 | 39.43227 | 40.3088  |
| gene-AT5C | 0.600069 | 0.602246 | 0.63091  | 1.476539 | 1.063402 | 1.264377 | 0.678299 | 0.708008 |
| gene-AT4C | 3.386275 | 2.550752 | 2.748229 | 6.950869 | 6.5278   | 6.18763  | 1.477431 | 2.098659 |
| gene-AT2C | 11.63677 | 12.60307 | 12.70387 | 12.28322 | 10.81692 | 12.08318 | 20.65484 | 18.38289 |
| gene-AT4C | 235.6253 | 233.1573 | 248.1317 | 164.8574 | 158.7058 | 156.2715 | 419.5033 | 439.3019 |
| gene-AT5C | 18.81429 | 14.25312 | 13.50035 | 14.52133 | 14.43475 | 17.03101 | 7.785466 | 5.809697 |
| gene-AT4C | 2.656654 | 2.56269  | 3.133682 | 1.563642 | 1.76246  | 1.682255 | 0.849037 | 1.063241 |
| gene-AT3C | 3.047408 | 4.191164 | 3.784182 | 2.795969 | 2.843756 | 2.266022 | 0.295274 | 0.276089 |
| gene-AT5C | 6.536541 | 6.872966 | 7.258568 | 26.42095 | 24.73037 | 25.62532 | 4.118562 | 2.475748 |
| gene-AT2C | 3.472351 | 3.259451 | 4.346388 | 2.710208 | 3.085116 | 2.06826  | 0.503668 | 0.465194 |
| gene-AT5C | 2.289747 | 2.628844 | 3.525927 | 4.267153 | 5.244803 | 4.460277 | 3.809765 | 3.135667 |
| gene-AT4C | 16.23599 | 13.92147 | 15.87944 | 10.47313 | 10.72656 | 10.39783 | 6.987549 | 5.86681  |
| gene-AT2C | 7.27453  | 5.516433 | 6.800551 | 5.374267 | 5.921757 | 4.971497 | 8.161253 | 7.640587 |
| gene-AT1C | 0.267438 | 0.175115 | 0.274169 | 0.18039  | 0.249854 | 0.325149 | 0.894149 | 1.012201 |
| gene-AT4C | 21.70848 | 20.11302 | 22.42095 | 17.61832 | 18.36608 | 17.21745 | 26.91441 | 26.7385  |
| gene-AT2C | 0.524379 | 0.562259 | 0.451791 | 0.380806 | 0.169603 | 0.294264 | 0.411996 | 0.656975 |
| gene-AT2C | 7.025154 | 6.446084 | 8.512263 | 2.162682 | 3.192087 | 2.854922 | 3.063088 | 2.812761 |
| gene-AT2C | 3.99623  | 3.421685 | 3.748765 | 1.952178 | 1.435219 | 1.64767  | 2.140566 | 2.174416 |
| gene-AT3C | 1.779684 | 2.116005 | 2.117808 | 0.827816 | 1.202295 | 0.787376 | 1.345515 | 1.450079 |
| gene-AT2C | 4.528292 | 3.987091 | 4.495123 | 3.104147 | 3.233886 | 2.825671 | 5.829451 | 5.602635 |
| gene-AT5C | 112.0813 | 138.1439 | 118.5918 | 50.03483 | 53.93146 | 52.80876 | 15.84145 | 15.42374 |
| gene-AT4C | 22.9565  | 25.37375 | 22.42739 | 7.089804 | 7.609809 | 8.519065 | 40.65614 | 43.03878 |
| gene-AT5C | 23.83661 | 24.62464 | 24.84815 | 13.55833 | 11.7734  | 12.07648 | 14.98471 | 15.72295 |
| gene-AT3C | 0.48001  | 0.544828 | 0.680539 | 0.817314 | 0.60347  | 0.859503 | 0.743126 | 0.249069 |
| gene-AT1C | 12.91516 | 14.05117 | 15.96658 | 19.60055 | 20.5289  | 22.91452 | 11.1029  | 10.00833 |
| gene-AT4C | 0.525774 | 0.181275 | 0.350603 | 0.294929 | 0.312988 | 0.37586  | 0.337226 | 0.505684 |
| gene-AT3C | 11.31026 | 10.2584  | 10.07392 | 11.6075  | 13.38043 | 11.61124 | 4.71751  | 3.701381 |
| gene-AT3C | 1.429564 | 1.316864 | 1.140283 | 1.439236 | 1.422637 | 1.123718 | 3.094    | 3.5929   |
| gene-AT5C | 8.678771 | 7.809476 | 8.44854  | 7.527395 | 9.498519 | 8.632792 | 3.406573 | 3.827445 |

|            |          |          |          |          |          |          |          |          |
|------------|----------|----------|----------|----------|----------|----------|----------|----------|
| gene-AT5C  | 6.343196 | 7.707119 | 6.576272 | 6.911654 | 6.437567 | 7.941891 | 1.751235 | 1.889319 |
| gene-AT3C  | 17.66233 | 17.34572 | 17.41585 | 21.06963 | 20.30639 | 22.02911 | 10.90873 | 10.09501 |
| gene-AT4C  | 6.959079 | 6.748114 | 6.295321 | 8.40629  | 8.262812 | 5.863599 | 12.10375 | 10.87867 |
| gene-AT4C  | 176.3251 | 186.1445 | 182.4748 | 242.2743 | 247.3081 | 227.428  | 104.4593 | 102.914  |
| gene-AT3C  | 6.362754 | 6.462138 | 5.935727 | 9.05179  | 6.612022 | 6.928791 | 4.313629 | 3.495976 |
| gene-AT3C  | 3.281093 | 3.698612 | 4.34692  | 2.772925 | 1.928301 | 2.560143 | 2.133813 | 2.005079 |
| gene-AT5C  | 15.1749  | 15.51938 | 13.76583 | 17.99219 | 17.34582 | 16.88466 | 6.200063 | 5.314574 |
| gene-AT5C  | 9.040408 | 8.65969  | 8.167786 | 8.229515 | 7.39966  | 8.564601 | 13.40418 | 13.13205 |
| gene-AT1C  | 82.93373 | 81.85076 | 88.76561 | 101.2944 | 104.4161 | 100.4437 | 57.7336  | 59.32358 |
| gene-AT5C  | 18.78542 | 18.8799  | 20.86628 | 25.77517 | 28.13571 | 26.35304 | 31.41692 | 28.23285 |
| gene-AT2C  | 1.508075 | 0.656226 | 1.789839 | 0.647519 | 2.341306 | 1.575324 | 1.36649  | 1.265111 |
| gene-AT4C  | 23.31958 | 23.14319 | 23.22936 | 16.26739 | 19.43449 | 17.39802 | 34.76924 | 37.35018 |
| gene-AT4C  | 69.87795 | 73.05527 | 61.99207 | 44.11843 | 48.75241 | 47.85052 | 123.66   | 126.1436 |
| gene-AT1C  | 57.53043 | 57.48891 | 62.1058  | 48.58119 | 49.4066  | 49.87771 | 65.84624 | 63.1014  |
| gene-AT1C  | 15.10532 | 16.07606 | 14.25067 | 11.97329 | 10.52628 | 12.30813 | 17.12793 | 19.81345 |
| gene-AT1C  | 4.621981 | 5.254683 | 4.899183 | 6.92573  | 7.866206 | 7.739098 | 4.917423 | 5.464067 |
| gene-AT1C  | 39.95583 | 38.33529 | 40.19012 | 21.34784 | 23.70902 | 22.60134 | 142.1293 | 147.3124 |
| gene-AT5C  | 32.63704 | 31.54058 | 32.58305 | 20.70753 | 20.39888 | 20.7975  | 36.26061 | 36.64008 |
| gene-AT3C  | 2.128799 | 2.665354 | 3.044505 | 3.346212 | 2.412615 | 2.609162 | 9.67845  | 8.946802 |
| gene-AT1C  | 103.9856 | 101.6619 | 107.9263 | 26.43903 | 29.74291 | 24.86148 | 83.70006 | 89.47405 |
| gene-AT5C  | 3.919341 | 3.464044 | 3.321181 | 4.771459 | 4.639446 | 5.19344  | 3.010507 | 3.175841 |
| gene-AT1C  | 16.4207  | 21.36409 | 18.23704 | 16.14512 | 18.71568 | 16.14204 | 24.68127 | 22.79975 |
| gene-AT4C  | 5.374627 | 4.949672 | 5.699913 | 3.160493 | 2.560251 | 3.050498 | 5.818462 | 6.642443 |
| gene-AT2C  | 31.80893 | 29.77753 | 30.97812 | 20.78477 | 19.98001 | 19.49589 | 45.64674 | 51.14437 |
| gene-AT1C  | 1.202076 | 0.824394 | 0.948287 | 1.948613 | 3.127765 | 2.127925 | 0.675207 | 1.101203 |
| gene-AT2C  | 45.15459 | 43.42825 | 46.98039 | 34.34272 | 33.82682 | 32.56287 | 18.19996 | 19.37597 |
| gene-AT1C  | 1.399155 | 1.217153 | 1.909197 | 1.282592 | 1.05994  | 0.74     | 0.856852 | 0.316821 |
| gene-AT5C  | 6.644616 | 6.939951 | 6.2708   | 79.75685 | 80.39918 | 75.72122 | 1.97216  | 1.617014 |
| gene-AT1C  | 4.982982 | 4.717654 | 4.061766 | 6.519746 | 7.556816 | 7.137465 | 5.102301 | 4.79298  |
| gene-AT4C  | 5.488857 | 5.562998 | 6.808776 | 4.525342 | 3.692491 | 5.393686 | 6.541295 | 7.669796 |
| gene-AT5C  | 5.382149 | 6.214604 | 5.248309 | 3.334027 | 2.982716 | 3.776737 | 8.624666 | 9.944002 |
| gene-AT3C  | 71.35201 | 69.79636 | 71.13557 | 51.25804 | 49.37397 | 50.847   | 57.95729 | 61.91625 |
| gene-AT5C  | 1.642317 | 1.637072 | 2.080041 | 0.932814 | 1.094437 | 1.400474 | 1.250731 | 1.24765  |
| gene-AT1C  | 49.64181 | 48.34362 | 48.67013 | 36.59051 | 37.14569 | 37.16328 | 34.04631 | 35.31165 |
| gene-AT3C  | 1.339634 | 0.528307 | 0.463866 | 0.585279 | 0.259927 | 0.264472 | 0.640067 | 1.27842  |
| gene-AT1C  | 2.054242 | 2.928505 | 3.642284 | 4.300261 | 4.128778 | 4.06991  | 0.954408 | 1.797671 |
| gene-AT5C  | 1.528606 | 1.335339 | 1.759741 | 0.714207 | 1.264091 | 0.58353  | 4.849868 | 4.171638 |
| gene-AT2C  | 0.073631 | 0        | 0.027335 | 1.563971 | 1.496811 | 1.888438 | 0        | 0.108474 |
| gene-AT2C  | 206.8535 | 209.3878 | 200.6425 | 118.3542 | 124.0192 | 122.0441 | 49.38293 | 50.32481 |
| gene-AT2C  | 6.165312 | 5.997623 | 6.061796 | 4.705463 | 4.490793 | 4.505405 | 2.393352 | 2.445577 |
| gene-AT5C  | 0.922419 | 0.738943 | 0.89518  | 0.632946 | 0.437527 | 0.995817 | 2.349686 | 2.16209  |
| gene-AT1C  | 17.43342 | 16.28407 | 16.78432 | 10.25872 | 8.705971 | 10.46483 | 5.102239 | 6.275574 |
| gene-AT5C  | 17.17682 | 19.68647 | 21.64148 | 13.98284 | 14.50467 | 12.17037 | 5.396036 | 6.272469 |
| gene-AT2C  | 0.902517 | 1.642317 | 1.430804 | 0.752191 | 0.966879 | 1.030916 | 0.304492 | 0.478349 |
| gene-AT2C  | 9.227135 | 8.709137 | 7.8313   | 7.883818 | 6.763412 | 7.079807 | 23.78478 | 23.92712 |
| gene-AT1C  | 2.58881  | 2.421934 | 2.674284 | 3.549418 | 3.730739 | 3.458366 | 1.298321 | 1.132005 |
| gene-AT4C  | 69.77093 | 70.05797 | 61.95719 | 109.2416 | 112.6598 | 112.1769 | 56.18591 | 52.57803 |
| gene-AT1C  | 1.538552 | 0.835258 | 1.210029 | 1.036522 | 0.859215 | 0.710026 | 1.289498 | 1.41479  |
| Arabidopsi | 0.283398 | 0.424012 | 0.495189 | 0.476684 | 0.452615 | 0.437835 | 0.392618 | 0.363236 |
| gene-AT1C  | 7.945013 | 7.691591 | 6.827131 | 3.985855 | 4.337148 | 3.505769 | 1.323096 | 1.206882 |
| gene-AT1C  | 0.5109   | 0.503447 | 0.406447 | 0.329261 | 0.261074 | 0.482593 | 0.989481 | 0.952262 |

|            |          |          |          |          |          |          |          |          |
|------------|----------|----------|----------|----------|----------|----------|----------|----------|
| gene-AT5C  | 5.361182 | 5.716747 | 5.423491 | 11.22103 | 12.12128 | 11.16629 | 6.820633 | 7.947846 |
| gene-AT3C  | 63.78158 | 69.7129  | 64.09969 | 81.4935  | 84.02841 | 87.83629 | 102.9781 | 88.32845 |
| gene-AT2C  | 0.50749  | 0.972994 | 0.863301 | 0.425018 | 0.664638 | 0.466302 | 1.129989 | 1.216399 |
| gene-AT5C  | 1.297265 | 1.329042 | 1.310615 | 0.969874 | 0.467515 | 1.200788 | 0.713523 | 1.600772 |
| gene-AT1C  | 2.340967 | 1.912524 | 2.031809 | 4.501497 | 3.599022 | 3.648772 | 3.640296 | 3.946614 |
| gene-AT3C  | 1.233676 | 0.565254 | 0.868581 | 1.266112 | 0.358578 | 0.788969 | 0.474932 | 0.861569 |
| gene-AT5C  | 6.081847 | 5.21952  | 5.066386 | 3.435082 | 3.660498 | 3.214824 | 12.72829 | 12.96264 |
| gene-AT5C  | 30.89585 | 26.70555 | 28.63031 | 31.15662 | 28.59416 | 28.97996 | 39.93868 | 45.50446 |
| gene-AT2C  | 47.19033 | 45.42022 | 45.23632 | 54.42544 | 50.46662 | 51.8304  | 46.06893 | 48.2798  |
| gene-AT3C  | 203.5146 | 222.8146 | 214.7136 | 219.9047 | 221.7896 | 229.7782 | 416.8749 | 410.6049 |
| gene-AT4C  | 3.083109 | 2.4214   | 3.358003 | 6.475235 | 6.410736 | 6.378601 | 2.731288 | 3.652585 |
| gene-AT5C  | 10.46837 | 10.71555 | 8.157527 | 8.592603 | 10.50024 | 10.79641 | 1.831697 | 2.029727 |
| gene-AT5C  | 14.42026 | 17.62844 | 17.04122 | 40.01312 | 38.59936 | 40.84238 | 23.79658 | 17.99359 |
| gene-AT4C  | 2.3591   | 1.334843 | 1.653513 | 0.29243  | 1.307341 | 0.139257 | 4.666872 | 1.983229 |
| gene-AT2C  | 1.094894 | 1.60457  | 1.418926 | 2.638155 | 1.95133  | 3.123725 | 0.470066 | 0.607212 |
| gene-AT4C  | 18.61854 | 16.32242 | 19.13634 | 14.13929 | 14.01722 | 12.71358 | 21.72904 | 22.31223 |
| gene-AT2C  | 57.6106  | 55.78703 | 59.19037 | 82.00565 | 81.45721 | 80.77264 | 33.60089 | 34.22933 |
| gene-AT5C  | 1.377144 | 1.809687 | 1.45773  | 1.444383 | 1.345247 | 1.918689 | 0.53366  | 0.42249  |
| gene-AT3C  | 7.341498 | 8.639254 | 7.483429 | 8.416333 | 9.016729 | 9.156052 | 8.885264 | 10.31171 |
| gene-AT5C  | 8.996868 | 8.292235 | 8.597154 | 9.48207  | 9.534879 | 9.443701 | 2.934134 | 3.144285 |
| gene-AT3C  | 0.424035 | 0.513456 | 0.325091 | 1.193687 | 1.160257 | 1.744791 | 0.810414 | 1.176226 |
| gene-AT1C  | 3.173752 | 2.601836 | 2.857418 | 16.03766 | 15.06945 | 14.73928 | 5.760173 | 5.955921 |
| gene-AT4C  | 61.17696 | 57.5722  | 57.91917 | 22.51258 | 22.67145 | 24.45768 | 59.18736 | 65.02161 |
| gene-AT4C  | 0.063705 | 0.041993 | 0.073849 | 0.10002  | 0.101703 | 0.087723 | 0.019898 | 0.052963 |
| gene-AT3C  | 197.7891 | 191.7317 | 193.3658 | 140.2254 | 143.0927 | 141.4738 | 329.3537 | 315.3945 |
| gene-AT3C  | 0.518892 | 0.598297 | 0.656638 | 0.32024  | 0.357194 | 0.509729 | 2.150803 | 2.05595  |
| gene-AT5C  | 2.44836  | 3.608065 | 2.853871 | 1.993602 | 2.810117 | 2.33541  | 1.144797 | 1.534292 |
| gene-AT5C  | 5.575745 | 6.185223 | 5.750007 | 6.348297 | 5.229571 | 5.355707 | 5.189581 | 7.858932 |
| gene-AT4C  | 2.116734 | 1.766189 | 1.735524 | 3.923954 | 3.727066 | 3.678704 | 2.234855 | 2.100632 |
| gene-AT1C  | 6.315715 | 4.085789 | 4.593004 | 1.173074 | 0.72855  | 0.856915 | 1.702161 | 0.922247 |
| gene-AT1C  | 21.11593 | 18.36657 | 18.17967 | 4.28487  | 4.754186 | 5.211363 | 6.69107  | 7.165469 |
| gene-AT1C  | 326.7193 | 324.0903 | 333.0842 | 263.2815 | 258.4091 | 255.2373 | 612.8233 | 566.9518 |
| gene-AT3C  | 1.597286 | 1.758373 | 1.872531 | 0.433733 | 0.490808 | 0.418965 | 0.521045 | 0.393557 |
| gene-AT3C  | 1.830364 | 1.745123 | 2.210873 | 0.590457 | 0.331295 | 0.256105 | 0.127298 | 0.088576 |
| gene-AT5C  | 2.968488 | 3.207963 | 2.918192 | 24.19061 | 23.62918 | 25.66293 | 2.172056 | 2.947401 |
| Arabidopsi | 3.249048 | 2.068151 | 2.652486 | 2.201179 | 2.141031 | 2.215211 | 1.216137 | 1.344575 |
| gene-AT3C  | 3.917757 | 4.525506 | 5.263037 | 6.173471 | 6.812246 | 7.657918 | 2.648073 | 2.224797 |
| gene-AT2C  | 1.109519 | 1.442678 | 1.339813 | 1.547566 | 1.554401 | 1.897117 | 2.269017 | 1.411753 |
| gene-AT1C  | 132.2655 | 125.1104 | 128.3488 | 13.34014 | 13.19996 | 14.27387 | 15.40621 | 15.03127 |
| gene-AT4C  | 8.350337 | 7.691081 | 7.949906 | 3.055598 | 2.194917 | 2.99526  | 5.877043 | 4.851779 |
| gene-AT3C  | 5.654002 | 4.414432 | 4.580647 | 5.158473 | 4.323948 | 4.436141 | 1.403846 | 1.781501 |
| gene-AT1C  | 84.52508 | 82.17969 | 80.95526 | 40.75949 | 43.27218 | 42.50332 | 41.17453 | 42.77623 |
| gene-AT5C  | 4.084478 | 4.910052 | 4.913991 | 14.60433 | 13.91395 | 15.31686 | 3.260056 | 3.590101 |
| gene-AT1C  | 10.09019 | 11.02914 | 10.16665 | 14.61427 | 13.87575 | 12.09613 | 3.560774 | 3.454864 |
| gene-AT2C  | 3824.064 | 3757.125 | 3898.527 | 1448.851 | 1423.023 | 1426.65  | 4665.622 | 4641.924 |
| gene-AT2C  | 8.653539 | 9.170561 | 9.87213  | 2.343859 | 1.320927 | 2.074077 | 0.272264 | 0.650865 |
| gene-AT3C  | 20.3051  | 21.35562 | 19.68834 | 10.89816 | 11.63275 | 10.10179 | 28.18513 | 27.89664 |
| gene-AT3C  | 1.249735 | 0.583452 | 0.815084 | 0.874362 | 1.018209 | 0.707157 | 0.090325 | 0.161898 |
| gene-AT3C  | 1.901752 | 3.213857 | 2.033947 | 0.639374 | 1.731165 | 1.388784 | 0.556332 | 0.304444 |
| gene-AT1C  | 2.75604  | 2.722033 | 3.269285 | 6.982258 | 6.747303 | 6.117065 | 2.385303 | 2.245904 |
| gene-AT1C  | 1.864804 | 1.76205  | 2.018462 | 3.382    | 1.947152 | 2.528491 | 2.793277 | 1.937442 |



|           |          |          |          |          |          |          |          |          |
|-----------|----------|----------|----------|----------|----------|----------|----------|----------|
| gene-AT5C | 12.93586 | 12.37464 | 12.4199  | 5.296329 | 7.090204 | 6.242686 | 1.150157 | 0.935781 |
| gene-AT4C | 35.05547 | 35.72848 | 30.64499 | 3.751164 | 5.706576 | 5.592944 | 32.87477 | 34.63048 |
| gene-AT3C | 1.767294 | 2.303837 | 2.325437 | 3.960875 | 3.313736 | 4.668985 | 0.769672 | 0.988353 |
| gene-AT2C | 2.214881 | 2.813919 | 2.588933 | 3.325433 | 2.619977 | 3.125176 | 1.584126 | 1.824612 |
| gene-AT1C | 4.06184  | 2.898262 | 3.085816 | 10.38405 | 11.0197  | 7.900876 | 4.165012 | 4.320132 |
| gene-AT4C | 21.27889 | 22.76899 | 21.68553 | 21.64826 | 22.14602 | 18.16173 | 7.838128 | 9.084485 |
| gene-AT1C | 22.34592 | 20.76597 | 22.53298 | 6.026556 | 6.172211 | 6.851433 | 42.49743 | 45.82402 |
| gene-AT4C | 125.9082 | 121.2475 | 126.8753 | 85.16176 | 85.97321 | 84.86675 | 20.647   | 20.00699 |
| gene-AT2C | 2.528536 | 2.128861 | 2.443003 | 1.904169 | 1.657547 | 1.607658 | 2.930931 | 3.581109 |
| gene-AT1C | 6.29289  | 6.495407 | 5.704311 | 12.78536 | 12.65446 | 13.25636 | 4.816463 | 4.628692 |
| gene-AT3C | 1.422752 | 1.659684 | 1.565663 | 1.493871 | 1.648737 | 1.602681 | 0.396508 | 0.367317 |
| gene-AT1C | 90.81753 | 90.37064 | 93.31243 | 55.69697 | 55.35908 | 58.26404 | 175.9843 | 171.2203 |
| gene-AT4C | 2.189245 | 2.154081 | 1.153428 | 0.740202 | 1.326233 | 2.040949 | 1.894276 | 1.661295 |
| gene-AT5C | 5.88672  | 6.100045 | 5.853458 | 4.001715 | 3.169507 | 2.785016 | 0.799115 | 1.160775 |
| gene-AT5C | 10.38971 | 11.78802 | 10.33154 | 12.07307 | 12.20516 | 10.9624  | 9.082639 | 8.850638 |
| gene-AT1C | 47.97583 | 48.25196 | 47.1634  | 44.43712 | 42.83315 | 42.77771 | 20.63645 | 22.77077 |
| gene-AT2C | 20.87096 | 20.25892 | 20.50784 | 12.82278 | 13.00363 | 13.25141 | 36.24746 | 33.10894 |
| gene-AT2C | 3.2378   | 2.022716 | 2.561632 | 2.89282  | 3.187984 | 3.288943 | 1.38852  | 0.99164  |
| gene-AT2C | 20.34881 | 19.69966 | 19.62159 | 36.18688 | 30.57793 | 33.75912 | 30.79741 | 34.19961 |
| gene-AT1C | 5.827102 | 5.204701 | 5.305981 | 5.945251 | 5.457197 | 6.058224 | 3.492186 | 4.145249 |
| gene-AT2C | 37.37054 | 36.3235  | 36.68521 | 34.42821 | 36.05072 | 38.29747 | 24.84833 | 21.19593 |
| gene-AT1C | 2.188319 | 2.04215  | 1.741084 | 3.670032 | 4.509313 | 4.49396  | 2.531769 | 2.341159 |
| gene-AT5C | 24.22074 | 28.27115 | 25.58549 | 12.69887 | 11.04654 | 10.60582 | 40.63488 | 46.58043 |
| gene-AT5C | 7.070891 | 7.076404 | 7.103601 | 3.186173 | 2.955264 | 3.607929 | 6.944498 | 5.636017 |
| gene-AT2C | 0.359244 | 0.150528 | 0.3214   | 0.249401 | 0.556204 | 0.424936 | 0.90978  | 1.218544 |
| gene-AT4C | 65.16277 | 67.94257 | 65.60059 | 58.17915 | 58.57771 | 62.43813 | 23.96391 | 22.69217 |
| gene-AT5C | 16.98869 | 17.81423 | 17.61317 | 7.960019 | 7.925862 | 7.738669 | 2.597555 | 2.699223 |
| gene-AT4C | 2.750548 | 2.824273 | 2.772449 | 8.708065 | 6.170543 | 6.533654 | 3.780412 | 3.097721 |
| gene-AT5C | 1.525283 | 1.42136  | 1.213929 | 1.060647 | 1.647455 | 1.024037 | 0.396839 | 0.183102 |
| gene-AT2C | 14.13944 | 15.52947 | 17.2652  | 15.051   | 13.29134 | 14.71951 | 21.99117 | 23.51069 |
| gene-AT2C | 0.613044 | 1.192065 | 0.934286 | 3.829409 | 3.33839  | 2.972844 | 1.06934  | 0        |
| gene-AT1C | 4392.322 | 4400.068 | 4581.196 | 4086.26  | 4121.011 | 4006.283 | 7112.841 | 7337.433 |
| gene-AT5C | 16.4007  | 17.27472 | 18.39616 | 18.40238 | 17.66031 | 17.43215 | 7.256159 | 8.238047 |
| gene-AT3C | 0.857727 | 1.016206 | 0.845924 | 0.436998 | 0.371704 | 0.408683 | 1.01829  | 1.185451 |
| gene-AT5C | 9.149914 | 7.855098 | 8.226638 | 4.980619 | 5.087671 | 4.514278 | 6.555158 | 6.645499 |
| gene-AT2C | 12.73571 | 15.68908 | 15.37427 | 14.2502  | 13.86833 | 13.26346 | 30.98842 | 29.29576 |
| gene-AT4C | 20.69199 | 20.54733 | 20.59796 | 14.9136  | 14.03399 | 14.37025 | 37.39354 | 37.86318 |
| gene-AT4C | 8.465102 | 9.53967  | 9.43579  | 11.57744 | 9.364819 | 10.15228 | 11.74043 | 13.02213 |
| gene-AT5C | 6.239642 | 7.727223 | 5.972279 | 5.283778 | 4.038988 | 4.717996 | 18.3157  | 19.02853 |
| gene-AT3C | 2.38361  | 3.468792 | 3.063799 | 2.642712 | 2.57053  | 3.447345 | 7.838613 | 9.108454 |
| gene-AT4C | 14.42108 | 13.98902 | 15.69324 | 35.8896  | 35.36843 | 34.13189 | 2.44953  | 3.376857 |
| gene-AT1C | 0.846095 | 0.947352 | 1.179909 | 1.917705 | 1.440754 | 1.708134 | 0.608228 | 0.469127 |
| gene-AT4C | 14.91642 | 14.37771 | 16.91093 | 4.773851 | 5.285687 | 6.504953 | 8.288793 | 7.54006  |
| gene-AT4C | 0.767344 | 0.861037 | 0.670905 | 6.008244 | 7.343291 | 7.385798 | 0.539057 | 0.592599 |
| gene-AT1C | 4.952844 | 5.390841 | 6.233179 | 7.006627 | 6.617286 | 6.135097 | 7.920299 | 8.011134 |
| gene-AT4C | 3.977614 | 3.993138 | 3.334853 | 1.815478 | 1.789638 | 3.017294 | 3.689682 | 4.792496 |
| gene-AT4C | 24.31392 | 23.63983 | 23.21521 | 13.59435 | 13.13521 | 12.97871 | 37.78171 | 38.72564 |
| gene-AT4C | 29.18687 | 29.64248 | 28.22154 | 23.02161 | 20.14135 | 22.29266 | 12.13756 | 10.77583 |
| gene-AT4C | 17.30065 | 17.421   | 16.73236 | 15.70819 | 15.75514 | 15.12772 | 24.766   | 27.22269 |
| gene-AT4C | 3.599164 | 3.22447  | 2.891225 | 8.495442 | 9.572569 | 9.079354 | 2.685749 | 2.478559 |
| gene-AT4C | 0        | 0        | 0.028539 | 17.21856 | 17.44016 | 16.49031 | 0        | 0        |

|            |          |          |          |          |          |          |          |          |
|------------|----------|----------|----------|----------|----------|----------|----------|----------|
| gene-AT5C  | 0.053319 | 0.05321  | 0.037702 | 0.02332  | 0.081005 | 0.05036  | 0.024519 | 0.189923 |
| gene-AT2C  | 61.55556 | 61.00384 | 62.46866 | 45.7629  | 52.75607 | 49.23917 | 89.45583 | 88.11681 |
| gene-AT4C  | 13.74432 | 15.6899  | 13.78854 | 24.02739 | 24.57843 | 26.61539 | 6.441953 | 5.392033 |
| gene-AT4C  | 11.21808 | 10.94909 | 11.34446 | 6.542608 | 5.956573 | 5.62799  | 4.376141 | 5.087467 |
| gene-AT1C  | 73.23609 | 77.43972 | 75.97981 | 77.43781 | 77.63139 | 80.19841 | 82.75732 | 76.46955 |
| gene-AT5C  | 1.755089 | 1.902379 | 2.505771 | 1.974129 | 2.180898 | 2.088767 | 4.106848 | 4.230165 |
| gene-AT3C  | 42.26601 | 42.46492 | 38.76751 | 36.65326 | 32.88433 | 32.79044 | 63.30624 | 65.10555 |
| gene-AT1C  | 3.190582 | 3.620459 | 3.658277 | 2.554744 | 1.724741 | 2.617452 | 1.719867 | 1.821993 |
| gene-AT1C  | 101.4101 | 93.6742  | 96.48693 | 213.9975 | 216.8037 | 222.1868 | 77.86585 | 75.89462 |
| gene-AT2C  | 5.78455  | 5.020174 | 5.743806 | 3.222134 | 2.725628 | 2.934021 | 6.910287 | 7.391271 |
| gene-AT3C  | 5.396942 | 7.020868 | 5.048701 | 9.172973 | 9.356776 | 8.868119 | 6.537763 | 6.616839 |
| gene-AT4C  | 28.57798 | 26.40725 | 28.42095 | 24.82348 | 24.2631  | 25.31444 | 23.80288 | 26.67476 |
| gene-AT4C  | 64.36334 | 60.55759 | 63.79038 | 71.69588 | 73.22324 | 73.8639  | 70.65918 | 64.65119 |
| gene-AT4C  | 7.139965 | 7.558114 | 5.867949 | 11.08441 | 10.53692 | 10.44187 | 2.572472 | 3.483416 |
| gene-AT5C  | 1.418082 | 1.189629 | 1.673171 | 0.806045 | 0.919778 | 1.022326 | 0.678527 | 0.286079 |
| gene-AT1C  | 4.077263 | 4.171129 | 3.576647 | 2.795335 | 2.821499 | 2.805123 | 0.750817 | 1.116477 |
| gene-AT5C  | 120.0583 | 117.9302 | 118.0686 | 232.992  | 238.7991 | 232.8828 | 68.07051 | 69.29697 |
| gene-AT4C  | 3.302577 | 2.821043 | 2.534606 | 1.765283 | 1.069314 | 1.129403 | 5.691955 | 5.616085 |
| gene-AT2C  | 50.48457 | 51.88247 | 47.46269 | 53.54155 | 56.14586 | 58.48077 | 26.22111 | 28.4186  |
| gene-AT5C  | 46.12571 | 37.94838 | 43.48203 | 38.8836  | 36.35915 | 36.10713 | 46.79904 | 47.18227 |
| gene-AT1C  | 2.903867 | 3.221111 | 3.359209 | 1.617335 | 2.122348 | 1.992953 | 2.116529 | 2.361536 |
| gene-AT4C  | 1.513229 | 2.427715 | 1.776576 | 2.731687 | 1.973299 | 2.917544 | 0.884698 | 1.255526 |
| gene-AT4C  | 7.172189 | 7.287719 | 7.470549 | 8.229059 | 7.614854 | 8.730661 | 3.518506 | 4.154168 |
| gene-AT4C  | 0.551391 | 0.267486 | 0.46721  | 2.180397 | 1.097802 | 1.712474 | 0.993219 | 0.411725 |
| gene-AT1C  | 41.50764 | 38.75668 | 40.83133 | 67.28136 | 65.67874 | 69.5364  | 32.13546 | 30.78498 |
| gene-AT2C  | 0.827809 | 1.259737 | 0.78342  | 0.389023 | 0.256539 | 0.281293 | 0.089736 | 0.255875 |
| gene-AT5C  | 17.77846 | 18.39422 | 16.98456 | 13.2574  | 14.74316 | 15.21326 | 27.16048 | 28.62235 |
| gene-AT3C  | 14.54933 | 14.27986 | 13.81783 | 11.98934 | 10.98362 | 10.26288 | 6.242715 | 5.888838 |
| gene-AT5C  | 0.712803 | 1.019829 | 0.574833 | 0.049639 | 0.291158 | 0.516362 | 2.048926 | 2.655421 |
| gene-AT3C  | 2.874221 | 1.959765 | 1.83844  | 0.85435  | 0.741332 | 0.73155  | 0.537402 | 0.693518 |
| gene-AT5C  | 7.143409 | 5.331078 | 6.845176 | 4.383981 | 7.305668 | 6.076993 | 10.94816 | 8.375435 |
| gene-AT3C  | 55.53367 | 54.15114 | 53.21469 | 51.10135 | 48.62597 | 47.96762 | 68.36005 | 63.93776 |
| gene-AT5C  | 58.42312 | 58.98343 | 60.37715 | 55.82265 | 54.71555 | 55.93365 | 80.4267  | 82.45626 |
| gene-AT1C  | 216.1916 | 218.1057 | 218.8167 | 205.1379 | 208.8228 | 209.4746 | 59.15682 | 64.14761 |
| gene-AT2C  | 10.62605 | 10.55172 | 9.920672 | 11.42651 | 10.69992 | 10.49516 | 3.669951 | 4.590505 |
| gene-AT4C  | 0.685562 | 0.459099 | 0.98327  | 1.550251 | 1.048375 | 1.822854 | 0.200258 | 0.804166 |
| gene-AT3C  | 6.318624 | 6.941096 | 6.513149 | 7.515136 | 7.656923 | 8.051742 | 4.731582 | 5.791452 |
| gene-AT5C  | 19.56425 | 19.86677 | 18.14128 | 22.96946 | 23.95978 | 21.81298 | 13.8709  | 15.44072 |
| gene-AT1C  | 6.343112 | 5.667026 | 5.926329 | 6.04946  | 6.424997 | 5.825145 | 6.831559 | 7.296458 |
| gene-AT1C  | 0.616499 | 0.42412  | 0.376858 | 1.107826 | 1.129404 | 0.825783 | 0.321882 | 0.455502 |
| gene-AT1C  | 1.473045 | 1.492841 | 1.291426 | 0.422096 | 0.609549 | 0.633392 | 3.534042 | 3.960397 |
| gene-AT3C  | 11.77374 | 11.40155 | 13.09036 | 13.36015 | 13.69006 | 13.03069 | 14.52166 | 15.02945 |
| gene-AT1C  | 20.9853  | 20.54449 | 19.52574 | 43.64531 | 42.87598 | 43.21988 | 4.527159 | 5.091571 |
| gene-AT3C  | 1.932241 | 2.059009 | 1.922358 | 1.73706  | 1.89493  | 1.271776 | 2.590781 | 3.169793 |
| gene-AT3C  | 16.82764 | 16.93581 | 17.56846 | 6.248838 | 7.367507 | 6.137723 | 10.49007 | 9.312155 |
| gene-AT1C  | 62.33435 | 58.48906 | 62.42013 | 73.85395 | 77.52292 | 76.70977 | 49.13826 | 53.12339 |
| gene-AT5C  | 8.346379 | 9.856231 | 7.892941 | 6.613695 | 6.99157  | 6.734141 | 6.638153 | 6.900957 |
| Arabidopsi | 1.059888 | 1.030161 | 0.65806  | 0.369643 | 0.733348 | 0.80373  | 0.33729  | 0.16261  |
| Arabidopsi | 1.320512 | 0.871842 | 1.83974  | 1.013373 | 1.044102 | 0.764468 | 2.074221 | 1.744974 |
| gene-AT2C  | 54.01583 | 53.39512 | 55.40725 | 30.03814 | 32.63456 | 32.62058 | 104.2351 | 99.48281 |
| gene-AT3C  | 0.37399  | 0.537662 | 0.544412 | 0.617423 | 0.386672 | 0.336074 | 2.0953   | 1.996346 |

|           |          |          |          |          |          |          |          |          |
|-----------|----------|----------|----------|----------|----------|----------|----------|----------|
| gene-AT4C | 8.350437 | 7.690486 | 8.021157 | 8.784318 | 9.327612 | 8.256751 | 9.881069 | 9.859562 |
| gene-AT5C | 55.30184 | 55.15029 | 53.83964 | 48.668   | 48.36808 | 45.96056 | 87.44575 | 89.99828 |
| gene-AT5C | 3.833259 | 4.358112 | 3.460714 | 7.543061 | 7.075718 | 7.396782 | 5.077756 | 5.304229 |
| gene-AT1C | 59.38486 | 58.65969 | 57.78026 | 25.794   | 25.28661 | 25.9014  | 68.37119 | 69.30833 |
| gene-AT1C | 50.51492 | 45.44279 | 49.61997 | 19.05516 | 24.72644 | 22.33728 | 81.44884 | 81.63646 |
| gene-AT3C | 2.374517 | 2.288648 | 2.492891 | 2.690655 | 2.655542 | 3.096766 | 1.440887 | 1.330477 |
| gene-AT5C | 0.140502 | 0.221035 | 0.202299 | 0.481342 | 0.412523 | 0.681084 | 0.652606 | 1.183486 |
| gene-AT1C | 1.692286 | 1.947797 | 2.824508 | 0.058846 | 0        | 0.112908 | 0        | 0        |
| gene-AT5C | 3.414413 | 3.801861 | 3.559266 | 8.726978 | 8.591426 | 7.512264 | 2.731082 | 3.659358 |
| gene-AT1C | 8.919119 | 11.22623 | 11.62788 | 10.19276 | 9.925645 | 8.362116 | 3.907806 | 4.140215 |
| gene-AT1C | 6.996187 | 6.30664  | 5.994617 | 9.315116 | 8.240515 | 8.133249 | 6.030061 | 5.819694 |
| gene-AT5C | 24.2363  | 23.94428 | 25.22546 | 24.72142 | 23.72332 | 23.48921 | 36.6242  | 38.29156 |
| gene-AT3C | 22.59792 | 22.67496 | 21.63524 | 19.44186 | 18.46566 | 17.85136 | 4.986049 | 4.954216 |
| gene-AT1C | 18.79373 | 19.36288 | 19.8306  | 4.747131 | 4.420477 | 4.611084 | 16.94619 | 15.21707 |
| gene-AT5C | 0.473702 | 0.22011  | 0.529596 | 0.611604 | 0.426673 | 0.523328 | 1.849302 | 1.533322 |
| gene-AT3C | 0.482063 | 0.40802  | 0.619347 | 2.377523 | 2.818001 | 2.564066 | 0.581053 | 0.487875 |
| gene-AT1C | 0.298478 | 0.2154   | 0.301896 | 0.213229 | 0.226681 | 0.310038 | 0.693803 | 0.931628 |
| gene-AT4C | 0.230767 | 0.27147  | 0.286783 | 0.735215 | 1.067475 | 1.119722 | 1.050664 | 0.777288 |
| gene-AT1C | 103.039  | 99.54367 | 100.6742 | 58.63865 | 56.74497 | 60.34699 | 126.3808 | 124.7871 |
| gene-AT4C | 7.581578 | 6.898089 | 6.589954 | 3.255462 | 3.583166 | 3.896807 | 2.306354 | 2.665958 |
| gene-AT1C | 23.57851 | 21.00248 | 23.06311 | 12.71611 | 12.32382 | 13.0095  | 17.97657 | 17.23981 |
| gene-AT5C | 1.78602  | 0.968557 | 0.994477 | 0.507394 | 0.461934 | 0.556539 | 0.860653 | 0.67948  |
| gene-AT4C | 12.18703 | 11.62909 | 14.12417 | 8.049307 | 8.645566 | 7.6453   | 13.69996 | 13.89571 |
| gene-AT2C | 88.65662 | 109.2687 | 96.45837 | 90.34308 | 93.34432 | 99.17025 | 50.13767 | 36.77589 |
| gene-AT1C | 2.065085 | 1.819959 | 1.671626 | 0.824012 | 0.684289 | 0.781882 | 2.507875 | 2.702407 |
| gene-AT3C | 64.58707 | 64.04209 | 63.92498 | 34.5783  | 35.77251 | 36.75872 | 79.81108 | 79.33729 |
| gene-AT5C | 0.722002 | 0.785514 | 0.934599 | 2.095456 | 1.607525 | 2.500446 | 0.121541 | 0.279975 |
| gene-AT3C | 5.788852 | 5.499445 | 4.727098 | 5.195984 | 5.548988 | 5.297722 | 7.564265 | 7.386184 |
| gene-AT1C | 8.642122 | 8.83149  | 7.769429 | 11.72793 | 11.20533 | 10.53259 | 3.278848 | 4.044226 |
| gene-AT5C | 20.83194 | 21.64909 | 20.59172 | 11.19334 | 13.47959 | 12.10478 | 16.01104 | 15.71037 |
| gene-AT4C | 61.62088 | 54.80255 | 51.28626 | 12.74578 | 16.70316 | 12.63196 | 186.4726 | 198.2693 |
| gene-AT4C | 0.655345 | 1.010834 | 0.596664 | 3.848562 | 3.313224 | 2.790727 | 0.201843 | 0.154403 |
| gene-AT2C | 2.367916 | 1.755282 | 1.166721 | 0.205741 | 0.618918 | 0.52979  | 5.186669 | 7.166242 |
| gene-AT5C | 11.19819 | 11.52319 | 11.10785 | 8.287306 | 9.221205 | 9.558036 | 14.99955 | 15.09981 |
| gene-AT1C | 596.9026 | 605.1322 | 596.811  | 333.8889 | 329.0679 | 324.0059 | 1097.886 | 1050.366 |
| gene-AT4C | 1.110026 | 1.518539 | 1.44185  | 1.302166 | 1.224439 | 0.896833 | 0.458529 | 0.585469 |
| gene-AT1C | 0.405997 | 0.973822 | 0.407522 | 0.920964 | 1.392004 | 1.498064 | 2.629932 | 4.184672 |
| gene-AT5C | 1.886858 | 2.460995 | 1.501263 | 2.284633 | 1.745843 | 2.371021 | 0.670412 | 1.105162 |
| gene-AT3C | 25.07024 | 29.04747 | 28.71891 | 19.03083 | 14.62409 | 16.46667 | 43.55541 | 39.152   |
| gene-AT3C | 1.277618 | 1.616682 | 1.175021 | 2.201948 | 2.1714   | 2.160364 | 1.262277 | 1.435187 |
| gene-AT2C | 3.861479 | 1.481776 | 2.40184  | 0.314137 | 0.867601 | 0.492681 | 0.566339 | 0.124467 |
| gene-AT5C | 3.815068 | 3.502806 | 3.569662 | 3.423711 | 3.113493 | 2.942401 | 8.578638 | 8.240346 |
| gene-AT1C | 1.39955  | 1.095002 | 1.699935 | 1.254225 | 1.183128 | 1.274132 | 0.498671 | 0.526379 |
| gene-AT4C | 1.126099 | 0.506905 | 1.091411 | 1.581147 | 0.599695 | 0.834747 | 0.910698 | 0.964436 |
| gene-AT1C | 11.90374 | 11.84311 | 11.86312 | 13.09231 | 10.68246 | 13.70116 | 8.13923  | 8.309329 |
| gene-AT3C | 208.3618 | 207.6426 | 207.5905 | 1110.659 | 1110.221 | 1090.501 | 114.0915 | 121.2466 |
| gene-AT1C | 2.680883 | 2.598543 | 2.732934 | 2.063098 | 3.079687 | 3.237042 | 1.138306 | 1.143113 |
| gene-AT3C | 0.294262 | 0.428624 | 0.234319 | 0.69941  | 0.318636 | 0.465546 | 0.347472 | 0.424812 |
| gene-AT2C | 10.89962 | 10.48367 | 10.10915 | 10.62071 | 10.61585 | 9.661635 | 3.527612 | 4.452793 |
| gene-AT4C | 1.282145 | 1.84957  | 1.235714 | 2.073079 | 1.906824 | 1.619352 | 3.159401 | 3.444613 |
| gene-AT1C | 10.78483 | 9.038346 | 10.94813 | 15.01324 | 16.20244 | 14.00202 | 37.09533 | 40.60925 |

|           |          |          |          |          |          |          |          |          |
|-----------|----------|----------|----------|----------|----------|----------|----------|----------|
| gene-AT3C | 6.406419 | 7.735235 | 7.694625 | 23.91989 | 22.69726 | 21.28099 | 5.74387  | 6.994976 |
| gene-AT1C | 1.305407 | 1.781144 | 1.158281 | 1.665938 | 2.163029 | 2.049953 | 4.667939 | 4.909123 |
| gene-AT3C | 1.799366 | 1.802503 | 2.237624 | 2.718995 | 3.34477  | 2.273646 | 0.858234 | 0.920601 |
| gene-AT2C | 5.829981 | 5.591131 | 4.894482 | 7.824019 | 7.438735 | 5.537009 | 2.067193 | 2.424096 |
| gene-AT1C | 1.519386 | 0.78267  | 1.116455 | 12.4488  | 12.96973 | 13.06096 | 0.531372 | 0.378647 |
| gene-AT5C | 28.1513  | 25.07418 | 25.31142 | 49.06883 | 46.63063 | 45.04916 | 22.07545 | 21.09655 |
| gene-AT1C | 6.756293 | 7.053158 | 8.760388 | 8.177592 | 7.748502 | 7.527807 | 15.34991 | 16.80047 |
| gene-AT2C | 15.78289 | 13.99072 | 13.54821 | 16.75911 | 17.75909 | 18.52279 | 1.554174 | 1.275546 |
| gene-AT1C | 6.8382   | 9.17781  | 7.941092 | 4.912745 | 4.055539 | 4.962587 | 12.09219 | 12.75162 |
| gene-AT5C | 14.01804 | 12.79544 | 14.3965  | 10.02429 | 8.507653 | 9.403749 | 20.40135 | 21.15544 |
| gene-AT2C | 8.560434 | 6.494693 | 7.865432 | 6.857176 | 6.872324 | 7.035651 | 2.027143 | 2.172195 |
| gene-AT3C | 0.608592 | 1.77989  | 1.174928 | 0.57381  | 0.639856 | 0.457634 | 1.132855 | 0.735329 |
| gene-AT4C | 27.71326 | 31.65694 | 27.25802 | 22.89208 | 22.32975 | 22.99654 | 61.87619 | 64.75648 |
| gene-AT3C | 0.102745 | 0.016384 | 0.037568 | 0        | 0        | 0.018293 | 0.012403 | 0        |
| gene-AT2C | 19.26995 | 16.27848 | 17.64932 | 35.90937 | 37.73089 | 35.01939 | 19.20075 | 19.51883 |
| gene-AT3C | 1.090693 | 0.809594 | 1.049806 | 0.930335 | 0.857511 | 0.86282  | 0.474591 | 0.595304 |
| gene-AT3C | 20.14619 | 18.61637 | 18.3986  | 16.60239 | 20.18213 | 18.18336 | 17.55158 | 18.41542 |
| gene-AT1C | 0.755624 | 0.641783 | 0.803585 | 2.694064 | 4.023667 | 2.503117 | 0.25548  | 0.359157 |
| gene-AT4C | 75.47845 | 79.14259 | 77.23003 | 62.45441 | 63.17981 | 63.21207 | 28.95741 | 31.74808 |
| gene-AT3C | 5.454851 | 6.202932 | 5.952011 | 8.383873 | 9.380869 | 9.095446 | 0.985025 | 0.982916 |
| gene-AT5C | 1.379768 | 2.077209 | 1.985328 | 4.531968 | 5.19701  | 4.136665 | 0.455583 | 0.64364  |
| gene-AT1C | 6.633998 | 7.18053  | 7.012459 | 4.306305 | 4.469858 | 4.387823 | 12.41119 | 12.91273 |
| gene-AT3C | 5.688715 | 4.761773 | 4.919133 | 8.59071  | 9.364154 | 9.059702 | 3.241933 | 2.620794 |
| gene-AT5C | 27.82048 | 29.76901 | 28.81067 | 30.68749 | 28.68535 | 29.18404 | 39.83752 | 42.27956 |
| gene-AT3C | 21.14811 | 22.11425 | 22.95809 | 17.77328 | 16.20021 | 16.38644 | 28.24286 | 29.0679  |
| gene-AT3C | 30.1083  | 29.47834 | 30.13974 | 21.51972 | 19.94227 | 18.02644 | 45.09788 | 43.33725 |
| gene-AT5C | 68.56655 | 68.61889 | 74.06845 | 99.37408 | 103.8661 | 102.6708 | 20.65367 | 19.82435 |
| gene-AT4C | 0.711734 | 1.395465 | 0.774232 | 2.410572 | 2.551976 | 2.808809 | 0.641561 | 0.593401 |
| gene-AT2C | 46.80319 | 53.44196 | 45.78379 | 31.95592 | 33.69274 | 30.89183 | 94.63889 | 97.03712 |
| gene-AT2C | 2.650536 | 3.106047 | 1.979181 | 1.4334   | 2.058274 | 1.509794 | 1.260166 | 0.747561 |
| gene-AT2C | 14.26366 | 13.87542 | 14.57136 | 21.56811 | 20.27008 | 18.57716 | 8.062356 | 8.394316 |
| gene-AT5C | 2.480762 | 1.478941 | 1.863637 | 5.953175 | 5.40775  | 5.613973 | 0.200484 | 0.111918 |
| gene-AT3C | 2.830074 | 2.480182 | 3.52443  | 5.699786 | 5.126854 | 5.429764 | 3.041017 | 2.825779 |
| gene-AT1C | 381.0906 | 371.5154 | 386.009  | 248.154  | 250.312  | 245.0122 | 611.4453 | 688.5524 |
| gene-AT5C | 4.283577 | 4.721292 | 4.940982 | 7.346158 | 4.685049 | 5.745799 | 2.193691 | 2.665539 |
| gene-AT2C | 20.24079 | 18.87594 | 18.60816 | 14.96095 | 12.91073 | 13.43547 | 28.23652 | 28.11993 |
| gene-AT1C | 19.77602 | 20.49506 | 16.43267 | 5.244093 | 5.780072 | 5.548307 | 1.469058 | 1.426961 |
| gene-AT5C | 149.6086 | 146.7202 | 145.587  | 124.5799 | 121.3101 | 124.2458 | 172.8736 | 183.0954 |
| gene-AT1C | 53.9345  | 48.87503 | 54.04558 | 36.44122 | 33.07284 | 32.67359 | 11.68171 | 13.63697 |
| gene-AT3C | 0.385346 | 0.227611 | 0.363555 | 0.606597 | 0.556871 | 0.549394 | 0.194853 | 0.228968 |
| gene-AT3C | 12.16569 | 11.78792 | 13.81563 | 9.495156 | 10.6654  | 9.983938 | 16.84936 | 17.95486 |
| gene-AT5C | 0.962916 | 1.090318 | 1.214181 | 0.286343 | 0.781929 | 0.214227 | 2.723842 | 3.172559 |
| gene-AT2C | 8.064589 | 7.462563 | 7.471879 | 18.18687 | 18.98434 | 17.11185 | 9.442936 | 7.957205 |
| gene-AT1C | 0.664022 | 1.010388 | 0.375178 | 1.663983 | 1.392357 | 1.417205 | 0.284009 | 0.957357 |
| gene-AT1C | 1.169871 | 1.370638 | 1.310296 | 1.369147 | 1.385415 | 1.715609 | 0.846681 | 0.891975 |
| gene-AT2C | 4.668354 | 4.693282 | 5.412045 | 3.588746 | 3.822991 | 4.183856 | 1.147327 | 0.683261 |
| gene-AT1C | 7.410468 | 7.396896 | 7.71334  | 3.721254 | 3.133025 | 4.560285 | 10.57717 | 11.26379 |
| gene-AT5C | 0.280483 | 0.357731 | 0.259342 | 1.581735 | 1.281083 | 1.207614 | 0.301009 | 0.292248 |
| gene-AT1C | 1.055899 | 1.717798 | 1.92788  | 2.848045 | 2.386469 | 2.50787  | 2.052268 | 2.257    |
| gene-AT4C | 9.311805 | 8.114562 | 9.049654 | 5.07291  | 5.024651 | 6.125733 | 4.673956 | 3.624522 |
| gene-AT2C | 4.369624 | 4.400407 | 3.803391 | 73.53896 | 69.662   | 68.56002 | 1.230456 | 1.169608 |

|           |          |          |          |          |          |          |          |          |
|-----------|----------|----------|----------|----------|----------|----------|----------|----------|
| gene-AT3C | 2.860541 | 2.937441 | 3.727502 | 7.404472 | 7.846032 | 6.952876 | 1.096304 | 1.140914 |
| gene-AT3C | 2.544488 | 2.425306 | 2.267202 | 1.589868 | 1.438687 | 1.512934 | 3.094396 | 2.758844 |
| gene-AT5C | 25.11477 | 24.33627 | 23.29113 | 15.55654 | 16.99667 | 15.97453 | 36.10863 | 37.1108  |
| gene-AT1C | 135.7807 | 132.133  | 125.6982 | 78.80257 | 76.03391 | 76.44577 | 205.4542 | 211.0344 |
| gene-AT1C | 9.826927 | 9.354746 | 8.050096 | 9.481803 | 9.646276 | 9.44209  | 14.9694  | 14.03966 |
| gene-AT1C | 2.354473 | 2.481408 | 2.640704 | 0.452679 | 0.792899 | 0.677582 | 0.636778 | 0.177136 |
| gene-AT1C | 12.35092 | 13.42731 | 13.48005 | 9.905963 | 11.89506 | 10.76341 | 21.26464 | 20.95751 |
| gene-AT1C | 5.669528 | 5.89545  | 5.779503 | 6.516454 | 8.394099 | 7.61746  | 2.057058 | 2.307128 |
| gene-AT3C | 11.25596 | 11.01531 | 11.28906 | 6.271251 | 4.697919 | 5.54857  | 12.19702 | 12.76998 |
| gene-AT5C | 9.155479 | 6.897393 | 8.572341 | 7.298118 | 5.788854 | 9.43024  | 12.98812 | 12.88575 |
| gene-AT4C | 5.470828 | 4.828885 | 3.787633 | 5.371214 | 7.261968 | 5.792879 | 5.299867 | 4.654138 |
| gene-AT5C | 133.3582 | 126.8411 | 134.7997 | 93.4037  | 92.96014 | 93.6295  | 157.0809 | 171.8992 |
| gene-AT2C | 11.608   | 11.223   | 10.32749 | 9.193072 | 6.868686 | 8.984168 | 22.7672  | 22.6447  |
| gene-AT5C | 2.687858 | 2.428743 | 2.397159 | 3.206803 | 1.78596  | 1.405808 | 1.758867 | 1.474129 |
| gene-AT5C | 2.01337  | 1.613032 | 1.769968 | 1.089961 | 1.087099 | 1.647641 | 1.044478 | 0.498228 |
| gene-AT5C | 8.019319 | 10.58171 | 7.894876 | 8.736101 | 9.87795  | 11.47919 | 3.773741 | 3.903109 |
| gene-AT2C | 9.482204 | 11.59817 | 9.901091 | 1.506723 | 1.767059 | 1.141509 | 1.329277 | 1.588462 |
| gene-AT5C | 33.5584  | 32.01524 | 35.86174 | 36.09057 | 39.33296 | 38.88273 | 15.77734 | 16.58477 |
| gene-AT2C | 22.71315 | 21.46619 | 23.0874  | 23.38375 | 24.21825 | 24.00908 | 19.12763 | 20.26309 |
| gene-AT2C | 10.51802 | 8.918555 | 9.883615 | 6.072909 | 6.474349 | 5.256877 | 12.589   | 12.26832 |
| gene-AT4C | 15.2851  | 16.18626 | 15.7445  | 20.34009 | 19.44678 | 19.81082 | 7.113307 | 7.575938 |
| gene-AT3C | 16.70762 | 18.96171 | 17.24417 | 19.4659  | 21.67338 | 20.96274 | 25.95138 | 25.57643 |
| gene-AT2C | 21.22374 | 20.84548 | 19.94177 | 4.356561 | 5.89081  | 3.696993 | 7.173435 | 6.771453 |
| gene-AT1C | 0.496836 | 0.125997 | 0.271147 | 0.581836 | 1.388938 | 1.192611 | 0.141993 | 0.274585 |
| gene-AT1C | 1.79831  | 1.62086  | 1.866844 | 1.309082 | 0.845551 | 1.111612 | 0.208741 | 0.283152 |
| gene-AT2C | 6.38484  | 5.797029 | 5.413773 | 5.535948 | 5.798356 | 6.125505 | 8.054538 | 10.54405 |
| gene-AT4C | 41.37641 | 44.34379 | 42.57544 | 36.58665 | 34.965   | 37.36703 | 71.91627 | 73.70951 |
| gene-AT1C | 5.322651 | 5.628993 | 5.893487 | 11.76448 | 10.62134 | 12.9129  | 3.300913 | 3.016384 |
| gene-AT3C | 410.7648 | 427.0005 | 428.2626 | 933.6307 | 924.5546 | 908.1302 | 171.4598 | 170.3311 |
| gene-AT1C | 79.87553 | 76.30797 | 78.89668 | 89.98515 | 91.58534 | 92.98814 | 57.58024 | 60.06397 |
| gene-AT4C | 31.01344 | 29.28621 | 27.86306 | 10.13427 | 9.401732 | 10.19495 | 53.91333 | 55.83609 |
| gene-AT5C | 1.875935 | 1.756825 | 1.013528 | 1.420239 | 1.334116 | 1.583908 | 1.622317 | 1.996017 |
| gene-AT2C | 52.16046 | 50.37782 | 51.59317 | 33.83877 | 32.35515 | 32.16161 | 71.6978  | 70.39195 |
| gene-AT2C | 1.030736 | 1.039623 | 1.133532 | 2.178087 | 1.844025 | 1.701001 | 0.514728 | 0.521522 |
| gene-AT5C | 6.665188 | 7.896614 | 7.745063 | 6.350874 | 7.4099   | 6.49581  | 6.635672 | 7.98278  |
| gene-AT4C | 7.569067 | 6.798556 | 7.259971 | 2.544301 | 2.322735 | 3.029849 | 2.34963  | 3.919367 |
| gene-AT2C | 25.74985 | 27.79289 | 26.4382  | 15.68792 | 14.48346 | 16.85677 | 37.62732 | 36.72392 |
| gene-AT4C | 1.193562 | 0.750854 | 1.634367 | 2.527179 | 2.616907 | 3.102928 | 0.898759 | 1.399132 |
| gene-AT4C | 1.363779 | 0.559135 | 1.423862 | 1.788068 | 1.068098 | 1.790018 | 0.68356  | 0.860517 |
| gene-AT5C | 10.22152 | 9.234749 | 9.857311 | 8.421202 | 10.28348 | 9.942181 | 15.08007 | 15.01423 |
| gene-AT3C | 15.76664 | 13.39625 | 14.09489 | 14.76757 | 17.32626 | 16.42976 | 5.553575 | 6.838142 |
| gene-AT5C | 50.17503 | 46.58512 | 46.13504 | 32.23372 | 35.85374 | 33.17121 | 70.06474 | 76.27936 |
| gene-AT5C | 27.09059 | 25.0249  | 28.95212 | 3.18468  | 2.998603 | 3.073925 | 2.18185  | 2.042928 |
| gene-AT4C | 0.827674 | 0.423384 | 0.639    | 0.566532 | 0.720555 | 0.512358 | 1.032189 | 0.981625 |
| gene-AT4C | 0.411878 | 0.897444 | 0.667663 | 1.185614 | 1.666212 | 1.887723 | 1.101832 | 1.007971 |
| gene-AT1C | 40.95789 | 38.82112 | 40.37698 | 36.09975 | 34.06818 | 34.72329 | 20.86142 | 20.72909 |
| gene-AT3C | 5.637741 | 5.458293 | 5.564072 | 3.860063 | 3.058897 | 3.855581 | 11.6211  | 11.36042 |
| gene-AT4C | 0.897354 | 0.911062 | 0.986274 | 0.872543 | 0.781981 | 1.092493 | 1.219237 | 1.583597 |
| gene-AT1C | 1.113774 | 0.609717 | 0.631038 | 0.748801 | 0.93198  | 0.713892 | 1.098252 | 0.967525 |
| gene-AT1C | 233.255  | 241.5202 | 243.8975 | 143.4987 | 147.9239 | 144.112  | 599.1779 | 565.5588 |
| gene-AT3C | 26.19955 | 25.32009 | 26.63589 | 43.37196 | 38.37975 | 39.00187 | 11.71198 | 11.86692 |

|           |          |          |          |          |          |          |          |          |
|-----------|----------|----------|----------|----------|----------|----------|----------|----------|
| gene-AT1C | 0.829648 | 0.833753 | 0.218097 | 2.400964 | 1.857455 | 1.450362 | 0.804439 | 0.993562 |
| gene-AT3C | 6.697126 | 6.947236 | 6.750364 | 16.38896 | 15.67029 | 15.57443 | 3.401227 | 3.92232  |
| gene-AT3C | 2.227244 | 1.397942 | 1.618217 | 0.759951 | 1.347469 | 1.251886 | 0.865545 | 0.527119 |
| gene-AT4C | 1.46695  | 1.260745 | 0.79829  | 2.046471 | 1.894202 | 1.854588 | 0.134929 | 0.476777 |
| gene-AT3C | 36.78415 | 37.14751 | 36.33726 | 23.39108 | 22.3324  | 22.63995 | 56.46348 | 55.87001 |
| gene-AT4C | 5.74565  | 5.55042  | 6.180404 | 10.79382 | 9.554465 | 10.17832 | 3.461808 | 3.17204  |
| gene-AT4C | 29.21934 | 27.32617 | 27.63674 | 18.16021 | 16.56649 | 17.2042  | 10.68613 | 11.01034 |
| gene-AT4C | 1.439458 | 1.573438 | 1.457719 | 5.748868 | 5.032801 | 5.202483 | 0.530486 | 0.858233 |
| gene-AT3C | 9.363618 | 9.222504 | 8.790816 | 11.91688 | 8.637825 | 8.768587 | 13.15157 | 14.72691 |
| gene-AT4C | 47.0037  | 49.91544 | 51.07049 | 109.1667 | 111.9119 | 108.5821 | 1.316011 | 1.315264 |
| gene-AT3C | 0        | 0        | 0        | 0.902847 | 0.526636 | 1.187158 | 0        | 0        |
| gene-AT3C | 2.779615 | 1.419491 | 1.620743 | 3.135245 | 3.279315 | 3.962946 | 3.893594 | 3.382411 |
| gene-AT4C | 83.43389 | 79.68676 | 84.44329 | 75.4531  | 75.45841 | 76.08857 | 45.28389 | 46.8219  |
| gene-AT5C | 7.68247  | 7.331735 | 6.946035 | 7.675377 | 6.262842 | 7.401314 | 0.963189 | 0.634517 |
| gene-AT5C | 7.763586 | 8.022735 | 8.179121 | 8.474839 | 8.860598 | 9.711332 | 12.88249 | 12.07816 |
| gene-AT1C | 12.32562 | 12.71547 | 12.70303 | 12.46699 | 10.53968 | 11.66776 | 4.514207 | 3.926633 |
| gene-AT4C | 11.32408 | 9.506237 | 10.78512 | 12.08467 | 11.71662 | 12.18847 | 20.7032  | 23.8224  |
| gene-AT3C | 27.04743 | 25.47054 | 26.68173 | 26.83977 | 24.17169 | 25.11175 | 43.0619  | 43.50334 |
| gene-AT1C | 28.75161 | 32.39543 | 29.91001 | 22.9856  | 23.30724 | 22.70726 | 24.44467 | 25.21414 |
| gene-AT1C | 106.199  | 106.9451 | 108.8191 | 64.60519 | 63.30602 | 64.58609 | 149.3872 | 153.9064 |
| gene-AT4C | 15.23977 | 13.97347 | 14.29939 | 12.07115 | 12.36607 | 10.43921 | 25.58825 | 23.00583 |
| gene-AT1C | 1574.286 | 1663.942 | 1575.639 | 1001.54  | 1010.408 | 1030.54  | 2395.009 | 2446.838 |
| gene-AT1C | 46.22432 | 48.66866 | 48.30343 | 33.46022 | 35.07708 | 34.39763 | 100.4852 | 97.5857  |
| gene-AT4C | 9.70495  | 9.508144 | 8.48215  | 8.499456 | 6.860389 | 8.576902 | 13.46558 | 13.36011 |
| gene-AT2C | 24.20496 | 23.39358 | 23.46699 | 16.4646  | 17.15088 | 17.52247 | 9.043679 | 9.279839 |
| gene-AT3C | 86.87585 | 85.02942 | 84.91542 | 39.00473 | 41.54361 | 38.17347 | 130.4282 | 129.1701 |
| gene-AT3C | 432.1923 | 416.7491 | 440.7573 | 731.3809 | 727.8406 | 724.8016 | 369.8682 | 395.4357 |
| gene-AT4C | 0.287646 | 0        | 0.203148 | 1.029292 | 0.748622 | 1.01129  | 0.060942 | 0.195305 |
| gene-AT4C | 30.69468 | 31.52322 | 34.65791 | 25.77269 | 25.74173 | 24.57475 | 69.54653 | 75.88188 |
| gene-AT5C | 0.897689 | 0.913583 | 0.823051 | 1.261544 | 1.193308 | 1.2223   | 0.794847 | 0.545309 |
| gene-AT5C | 4.306959 | 3.923824 | 4.405196 | 4.383218 | 3.638952 | 4.016768 | 7.987324 | 6.710113 |
| gene-AT1C | 10.44669 | 9.597002 | 8.716453 | 4.287318 | 4.870074 | 3.997648 | 14.79648 | 14.8786  |
| gene-AT5C | 16.64854 | 16.1376  | 16.41932 | 25.6601  | 26.70507 | 27.34383 | 12.7756  | 12.14835 |
| gene-AT1C | 1.513609 | 1.780564 | 1.908765 | 3.424628 | 3.111727 | 3.567909 | 0.249596 | 0.430894 |
| gene-AT4C | 17.19415 | 16.88249 | 17.42164 | 29.87555 | 30.98128 | 32.09816 | 25.00613 | 25.41951 |
| gene-AT2C | 32.90063 | 36.19082 | 36.64888 | 30.58414 | 28.25747 | 27.89789 | 53.80358 | 52.01157 |
| gene-AT1C | 15.19326 | 17.14129 | 16.29733 | 14.98211 | 13.67029 | 13.98045 | 28.06579 | 28.99234 |
| gene-AT2C | 0.564003 | 0.377048 | 0.396975 | 0.344687 | 0.768497 | 0.570068 | 0.248838 | 0.285111 |
| gene-AT1C | 0.634945 | 0.673163 | 0.857771 | 2.446734 | 3.012878 | 3.237659 | 0.080227 | 0.19248  |
| gene-AT4C | 13.62596 | 14.54902 | 14.62168 | 11.47833 | 10.2875  | 11.78822 | 4.476042 | 4.186757 |
| gene-AT2C | 10.55695 | 10.89545 | 12.29208 | 9.751445 | 9.695703 | 10.00001 | 17.02289 | 18.39595 |
| gene-AT2C | 18.72278 | 18.43763 | 18.6503  | 10.28745 | 9.845953 | 9.001573 | 39.01122 | 39.61299 |
| gene-AT2C | 4.5611   | 4.234782 | 5.738232 | 5.294507 | 5.719109 | 4.787923 | 1.491683 | 1.243526 |
| gene-AT1C | 12.64963 | 13.16572 | 11.80169 | 10.04333 | 10.15626 | 10.03677 | 23.36234 | 24.24043 |
| gene-AT3C | 45.88563 | 45.95719 | 47.21098 | 48.02427 | 46.48501 | 48.05376 | 60.19715 | 62.80509 |
| gene-AT4C | 16.37156 | 14.60889 | 16.74839 | 14.14128 | 14.9883  | 14.59796 | 21.74715 | 24.39171 |
| gene-AT2C | 26.15011 | 23.83366 | 26.60787 | 18.88708 | 17.91289 | 16.5114  | 30.05082 | 31.10887 |
| gene-AT4C | 27.40263 | 31.72654 | 28.26101 | 43.02831 | 42.51562 | 43.90035 | 27.09502 | 28.88415 |
| gene-AT1C | 8.34154  | 5.736607 | 5.529808 | 15.88784 | 19.65726 | 20.74032 | 7.254512 | 9.595248 |
| gene-AT5C | 19.57844 | 20.83861 | 21.7374  | 6.960842 | 8.554617 | 7.903272 | 18.80343 | 20.77255 |
| gene-AT1C | 1.491584 | 1.095323 | 1.006554 | 0.751925 | 0.802446 | 0.697142 | 0.770443 | 0.803121 |

|           |          |          |          |          |          |          |          |          |
|-----------|----------|----------|----------|----------|----------|----------|----------|----------|
| gene-AT1C | 0        | 0.349071 | 0.221445 | 1.695619 | 1.779786 | 1.556787 | 0.338672 | 0.21915  |
| gene-AT1C | 2.936343 | 2.306799 | 3.435012 | 12.59869 | 16.22688 | 13.01533 | 5.201858 | 4.498335 |
| gene-AT3C | 0.82126  | 0.742309 | 1.341682 | 0.377354 | 0.678568 | 0.359389 | 0.982666 | 1.189661 |
| gene-AT1C | 6.585778 | 7.020622 | 5.68139  | 4.663254 | 6.119452 | 4.39541  | 8.403629 | 6.241589 |
| gene-AT5C | 20.19709 | 19.52243 | 21.69352 | 20.37285 | 19.91192 | 20.27706 | 16.1789  | 17.61555 |
| gene-AT3C | 23.92761 | 23.23355 | 25.27991 | 18.23644 | 17.29679 | 17.09715 | 6.407842 | 5.16802  |
| gene-AT5C | 23.04895 | 22.66569 | 23.99637 | 22.11578 | 23.11326 | 20.91836 | 48.2689  | 52.02964 |
| gene-AT4C | 8.310115 | 9.624139 | 7.809451 | 13.17277 | 12.61443 | 12.30608 | 4.746308 | 3.914645 |
| gene-AT1C | 5.962229 | 5.406171 | 6.391753 | 7.688933 | 5.791709 | 6.985834 | 12.91531 | 11.43065 |
| gene-AT1C | 18.52441 | 18.53295 | 18.83957 | 18.43473 | 14.98298 | 15.5453  | 26.77472 | 25.86798 |
| gene-AT4C | 2.594407 | 2.473269 | 2.797236 | 1.995448 | 1.251539 | 1.383993 | 2.060195 | 2.408722 |
| gene-AT4C | 288.6469 | 286.5872 | 299.5624 | 336.009  | 312.4386 | 325.9283 | 225.4308 | 231.1834 |
| gene-AT2C | 0.342878 | 0.759645 | 0.402337 | 0.573702 | 0.414984 | 0.413774 | 0.042521 | 0.167492 |
| gene-AT1C | 53.55099 | 57.38368 | 58.79481 | 50.77058 | 51.96124 | 49.03377 | 16.45103 | 17.30281 |
| gene-AT3C | 3.618221 | 3.848505 | 3.114555 | 0.616795 | 0.584181 | 0.812186 | 0.295471 | 0.942133 |
| gene-AT5C | 13.67719 | 11.98399 | 12.01169 | 4.661427 | 5.184934 | 3.759874 | 2.831277 | 2.950398 |
| gene-AT3C | 5.772081 | 5.680602 | 4.287033 | 11.48725 | 11.54277 | 10.63107 | 6.780327 | 6.08525  |
| gene-AT3C | 3.845182 | 4.074141 | 3.702985 | 4.32978  | 5.481492 | 4.54982  | 8.327723 | 10.66747 |
| gene-AT1C | 0.889757 | 1.024822 | 1.188933 | 2.891269 | 2.837401 | 2.667431 | 0.180769 | 0.223988 |
| gene-AT1C | 9.563892 | 8.348323 | 9.145242 | 1.395845 | 1.634309 | 1.992183 | 2.328608 | 2.119272 |
| gene-AT3C | 1.040966 | 1.301554 | 1.242763 | 0.736742 | 0.42559  | 0.51843  | 3.773256 | 4.264272 |
| gene-AT2C | 220.1876 | 207.3732 | 216.4139 | 87.56288 | 88.60577 | 83.85385 | 333.6588 | 340.5932 |
| gene-AT3C | 2.715595 | 2.519457 | 2.730108 | 2.507161 | 2.32127  | 1.920317 | 2.457572 | 2.756889 |
| gene-AT4C | 3.079973 | 4.070466 | 4.433005 | 4.345571 | 3.474053 | 4.209195 | 1.401781 | 1.154535 |
| gene-AT1C | 2.309064 | 1.869135 | 1.401881 | 2.360057 | 2.635139 | 2.566949 | 0.343187 | 0.673733 |
| gene-AT5C | 1.031089 | 0.752712 | 0.531667 | 1.475843 | 2.142348 | 1.623893 | 1.360127 | 1.332007 |
| gene-AT4C | 2.772752 | 2.362718 | 2.803198 | 1.392687 | 1.311397 | 1.788661 | 2.565535 | 2.744882 |
| gene-AT5C | 33.40163 | 32.20657 | 29.93764 | 25.92724 | 25.29271 | 24.90653 | 40.71372 | 45.58242 |
| gene-AT4C | 0.074141 | 0.235822 | 0.147848 | 0.235933 | 0.143838 | 0.35058  | 0        | 0        |
| gene-AT1C | 1.08094  | 1.250289 | 0.92457  | 3.772202 | 4.629195 | 3.42164  | 0.72166  | 1.236516 |
| gene-AT5C | 46.76877 | 40.00931 | 41.16054 | 29.20913 | 27.33616 | 31.3754  | 66.51466 | 62.83793 |
| gene-AT3C | 2.49069  | 2.302696 | 1.531493 | 2.053974 | 1.199688 | 1.798382 | 5.505337 | 4.298483 |
| gene-AT3C | 1837.017 | 1839.057 | 1896.318 | 971.1172 | 954.486  | 936.9833 | 2397.781 | 2504.746 |
| gene-AT2C | 0.693259 | 0.545497 | 0.924237 | 1.334251 | 1.324662 | 1.006813 | 0.028432 | 0.068673 |
| gene-AT5C | 12.89515 | 12.40161 | 13.25682 | 16.56907 | 15.42769 | 15.35636 | 8.17183  | 8.044386 |
| gene-AT3C | 3.584611 | 3.83746  | 4.408724 | 3.160127 | 3.539407 | 3.119973 | 4.679148 | 5.174398 |
| gene-AT4C | 980.9431 | 945.2828 | 984.46   | 513.1685 | 496.4928 | 485.1042 | 1470.282 | 1513.733 |
| gene-AT2C | 41.90078 | 40.15577 | 42.85817 | 36.98334 | 35.85069 | 38.32406 | 17.15911 | 18.54407 |
| gene-AT1C | 2.292571 | 1.935528 | 2.463985 | 1.192153 | 1.28595  | 2.15434  | 0.889741 | 0.978225 |
| gene-AT4C | 72.27196 | 64.71993 | 62.99837 | 19.86684 | 21.31961 | 19.07556 | 17.78557 | 20.58519 |
| gene-AT3C | 8.764883 | 12.27997 | 8.951984 | 10.00191 | 8.243464 | 11.95052 | 4.47457  | 3.77187  |
| gene-AT5C | 8.993054 | 7.884893 | 8.16049  | 2.73482  | 2.698867 | 2.268748 | 2.571279 | 2.625993 |
| gene-AT3C | 1.189539 | 0.669503 | 0.73335  | 1.879978 | 2.076255 | 1.903869 | 2.18259  | 1.619629 |
| gene-AT2C | 4.086993 | 2.938818 | 3.30755  | 3.832951 | 2.821915 | 3.23648  | 1.117238 | 1.794938 |
| gene-AT3C | 0.607368 | 0.584436 | 0.394816 | 0.03854  | 0        | 0        | 0.162058 | 0.220228 |
| gene-AT5C | 22.3332  | 19.43752 | 20.60531 | 17.04502 | 16.17809 | 16.0307  | 1.768047 | 2.050918 |
| gene-AT4C | 0.994224 | 0.892329 | 1.033538 | 1.224939 | 1.544943 | 1.416861 | 1.953282 | 2.248381 |
| gene-AT4C | 24.30089 | 22.04947 | 24.48945 | 21.84383 | 21.62953 | 19.99031 | 12.73126 | 12.34869 |
| gene-AT2C | 16.21278 | 15.50783 | 15.20358 | 27.8288  | 30.31892 | 26.66519 | 11.11984 | 11.60356 |
| gene-AT5C | 2.800323 | 2.065611 | 2.718271 | 1.228866 | 0.968759 | 1.429658 | 0.64977  | 0.906746 |
| gene-AT2C | 2.771309 | 1.919936 | 2.817902 | 1.139923 | 2.17076  | 1.435204 | 3.498115 | 2.843256 |

|           |          |          |          |          |          |          |          |          |
|-----------|----------|----------|----------|----------|----------|----------|----------|----------|
| gene-AT5C | 4.000166 | 3.93822  | 3.947038 | 5.439318 | 5.181755 | 5.42777  | 4.3418   | 5.664337 |
| gene-AT2C | 1124.328 | 1221.46  | 1163.022 | 2118.61  | 2297.671 | 2352.898 | 628.2675 | 570.5362 |
| gene-AT4C | 4.895081 | 6.117172 | 4.591682 | 21.39189 | 22.95001 | 23.00085 | 7.266231 | 7.326406 |
| gene-AT1C | 2.657399 | 3.360738 | 2.998587 | 2.893228 | 2.896225 | 2.602834 | 4.142457 | 4.400187 |
| gene-AT4C | 2.159594 | 2.182626 | 2.56406  | 1.946376 | 2.18632  | 1.671292 | 1.301367 | 1.013384 |
| gene-AT1C | 3.416344 | 3.075057 | 2.94181  | 2.129667 | 2.318879 | 2.559432 | 2.458786 | 2.407925 |
| gene-AT3C | 6.714324 | 6.481718 | 7.053911 | 11.58607 | 9.586233 | 9.245878 | 3.630418 | 3.315909 |
| gene-AT3C | 1.810014 | 1.686355 | 1.507836 | 1.985857 | 2.703612 | 2.564061 | 1.152891 | 1.330429 |
| gene-AT5C | 5.825637 | 6.424632 | 6.819496 | 5.545509 | 5.780984 | 5.793659 | 15.99485 | 16.66805 |
| gene-AT1C | 12.02519 | 11.46225 | 11.86229 | 10.73471 | 11.0061  | 11.35895 | 15.2953  | 17.39279 |
| gene-AT1C | 0.097492 | 0        | 0.057553 | 0.1852   | 0.223281 | 0.246771 | 0.084812 | 0.159944 |
| gene-AT1C | 8.848786 | 9.078093 | 8.879932 | 8.571914 | 8.362695 | 9.009358 | 16.17831 | 16.09662 |
| gene-AT1C | 0.809803 | 0.785679 | 0.781789 | 1.334008 | 1.147314 | 1.111604 | 1.929094 | 1.967015 |
| gene-AT1C | 2.958915 | 3.313138 | 2.945282 | 4.663752 | 3.795919 | 4.595731 | 0.492624 | 0.241677 |
| gene-AT5C | 16.60548 | 16.45912 | 16.78634 | 37.12794 | 38.08562 | 39.49855 | 11.03449 | 8.242695 |
| gene-AT4C | 1.587461 | 1.082076 | 1.819832 | 1.462022 | 1.183482 | 1.203251 | 0.736922 | 0.819285 |
| gene-AT1C | 6.114239 | 6.797451 | 7.048489 | 0.526136 | 1.090151 | 0.859999 | 9.756563 | 8.874401 |
| gene-AT1C | 0.267915 | 0.691652 | 0.780833 | 1.598451 | 2.04908  | 1.844496 | 2.207423 | 2.211203 |
| gene-AT4C | 3.797205 | 3.880356 | 4.034802 | 13.94915 | 14.24318 | 14.32766 | 2.919935 | 1.25584  |
| gene-AT1C | 40.60271 | 38.51034 | 36.72062 | 19.63732 | 19.2286  | 20.15924 | 79.07043 | 81.10443 |
| gene-AT1C | 14.53131 | 15.15507 | 15.59411 | 19.25033 | 17.45444 | 16.96163 | 14.57583 | 13.30676 |
| gene-AT3C | 0        | 0.153145 | 0        | 0.126881 | 0.300309 | 0.332319 | 0        | 0        |
| gene-AT3C | 0.214535 | 0.435378 | 0.516532 | 0.229523 | 0.459307 | 0.973681 | 0.837711 | 0.180535 |
| gene-AT3C | 0.471578 | 0.587527 | 0.627271 | 1.232981 | 0.969084 | 0.866419 | 0.191768 | 0.108943 |
| gene-AT4C | 257.3517 | 250.6569 | 255.2951 | 400.0959 | 391.6932 | 391.0227 | 186.4134 | 184.8047 |
| gene-AT1C | 3.237619 | 3.62141  | 3.631466 | 15.94708 | 18.30717 | 18.37104 | 3.037486 | 2.288339 |
| gene-AT4C | 48.4661  | 55.98063 | 54.10564 | 84.10078 | 86.76933 | 87.97195 | 76.66337 | 79.83589 |
| gene-AT3C | 1.594332 | 1.35503  | 1.657008 | 0.609185 | 0.472097 | 0.472581 | 0.758558 | 0.73575  |
| gene-AT1C | 3.220111 | 2.832233 | 3.520576 | 3.880619 | 3.957013 | 3.9343   | 6.098714 | 6.343664 |
| gene-AT1C | 1.143152 | 1.432696 | 1.57612  | 2.26023  | 3.956724 | 2.826151 | 1.21414  | 1.167984 |
| gene-AT1C | 1.226207 | 1.271169 | 0.802054 | 1.821555 | 2.969004 | 1.912098 | 1.82019  | 2.799305 |
| gene-AT3C | 1.810241 | 1.568406 | 1.806516 | 1.538133 | 1.895243 | 2.076098 | 3.124466 | 2.912186 |
| gene-AT2C | 1.669433 | 2.249591 | 2.287688 | 0.141759 | 0.170418 | 0.147308 | 11.60145 | 11.82668 |
| gene-AT5C | 5.675688 | 4.91294  | 4.643304 | 32.47511 | 34.57922 | 32.72514 | 2.818165 | 2.598687 |
| gene-AT5C | 1.010364 | 1.683064 | 0.937183 | 1.024328 | 1.246497 | 1.094802 | 1.963641 | 3.477122 |
| gene-AT2C | 3.306759 | 3.085479 | 2.234795 | 0.712745 | 1.207082 | 0.632705 | 7.851119 | 7.761296 |
| gene-AT5C | 1.872263 | 2.060019 | 1.658017 | 2.520875 | 2.821735 | 2.02491  | 1.086215 | 1.106298 |
| gene-AT4C | 38.5196  | 42.45691 | 42.3492  | 28.10988 | 26.60416 | 25.76739 | 86.74896 | 86.10257 |
| gene-AT1C | 24.85741 | 26.32469 | 25.0128  | 26.80183 | 29.82936 | 28.51394 | 18.98256 | 18.38649 |
| gene-AT5C | 6.279085 | 5.267426 | 5.016059 | 3.315682 | 3.185518 | 3.986867 | 1.849394 | 1.712399 |
| gene-AT3C | 64.47622 | 63.64138 | 63.18975 | 41.52989 | 42.03611 | 39.84516 | 105.9422 | 103.9744 |
| gene-AT3C | 5.529569 | 7.72644  | 7.054955 | 9.991936 | 9.835304 | 9.718431 | 12.63442 | 15.16473 |
| gene-AT5C | 19.99656 | 21.58825 | 17.66531 | 6.011545 | 6.499573 | 5.877896 | 25.46918 | 25.20499 |
| gene-AT5C | 0.839564 | 1.349897 | 0.80044  | 2.008065 | 2.875782 | 2.210365 | 0.330799 | 0.364536 |
| gene-AT2C | 49.97168 | 52.02276 | 52.34406 | 40.75614 | 42.71926 | 44.18288 | 83.9642  | 89.43503 |
| gene-AT1C | 3.262735 | 3.688771 | 3.398703 | 0.203416 | 0.32633  | 0.40336  | 0.114058 | 0        |
| gene-AT3C | 1.843854 | 1.583851 | 2.069502 | 1.770019 | 1.937601 | 1.652137 | 2.289841 | 2.505067 |
| gene-AT1C | 16.81691 | 15.8495  | 17.00563 | 29.38799 | 31.0862  | 25.8042  | 5.035357 | 5.034104 |
| gene-AT2C | 2.216596 | 1.585621 | 2.177155 | 22.06829 | 26.39672 | 27.28427 | 2.131697 | 2.331692 |
| gene-AT1C | 90.73911 | 98.72126 | 94.05033 | 63.55839 | 57.86714 | 61.42548 | 162.5133 | 179.3933 |
| gene-AT3C | 26.59568 | 26.60492 | 26.72004 | 10.89868 | 11.19325 | 11.79047 | 8.864228 | 9.46881  |



|            |          |          |          |          |          |          |          |          |
|------------|----------|----------|----------|----------|----------|----------|----------|----------|
| gene-AT3C  | 3.820285 | 5.183801 | 3.973419 | 2.835328 | 3.645607 | 3.719323 | 5.281335 | 4.732679 |
| gene-AT2C  | 0.797392 | 0.820166 | 0.555169 | 1.431307 | 1.149203 | 1.064557 | 0.128492 | 0.244415 |
| gene-AT3C  | 6.67244  | 7.667679 | 6.160633 | 11.60556 | 11.97032 | 11.63416 | 1.945489 | 2.350089 |
| gene-AT3C  | 1.198379 | 1.538961 | 1.29136  | 1.208484 | 1.393188 | 0.901051 | 1.177752 | 1.841898 |
| gene-AT5C  | 37.84444 | 35.03422 | 37.58675 | 24.84027 | 25.30017 | 26.79113 | 63.87978 | 71.75018 |
| gene-AT4C  | 8.333551 | 9.461385 | 8.325555 | 13.09876 | 13.02019 | 12.03881 | 1.914769 | 2.104558 |
| gene-AT2C  | 7.373713 | 6.203033 | 6.91817  | 4.764371 | 4.393525 | 2.453395 | 0        | 0.586876 |
| Arabidopsi | 10.14259 | 11.4498  | 10.61681 | 7.898043 | 7.543725 | 7.362461 | 4.274356 | 4.445814 |
| gene-AT2C  | 7.7129   | 9.633612 | 8.051412 | 5.191727 | 5.37907  | 5.420934 | 1.223278 | 0.916839 |
| gene-AT4C  | 18.51632 | 22.17307 | 16.35778 | 13.11505 | 14.47277 | 13.02824 | 26.99083 | 28.93586 |
| gene-AT5C  | 14.96568 | 13.75968 | 14.44863 | 33.25763 | 32.48985 | 32.67479 | 17.48007 | 16.93202 |
| gene-AT1C  | 0.997575 | 1.091544 | 1.125243 | 1.402336 | 1.344994 | 1.589802 | 1.250577 | 0.870613 |
| gene-AT2C  | 0.561121 | 0.129395 | 0.147735 | 1.206556 | 1.780806 | 1.627808 | 0.087065 | 0.2289   |
| gene-AT5C  | 133.4348 | 132.2702 | 138.6463 | 179.3518 | 175.6709 | 174.0821 | 80.57302 | 80.40783 |
| gene-AT1C  | 0.801579 | 1.25418  | 0.82831  | 1.871125 | 2.020792 | 2.381154 | 0.849679 | 0.856447 |
| gene-AT5C  | 6.161226 | 6.230721 | 6.725851 | 8.227328 | 7.409712 | 6.9394   | 2.169018 | 2.429525 |
| gene-AT2C  | 0.044957 | 0.243687 | 0.052085 | 1.453462 | 0.696352 | 1.095892 | 0.09499  | 0.277841 |
| gene-AT5C  | 4.398287 | 4.03646  | 4.36376  | 2.701183 | 2.367041 | 2.652033 | 1.382227 | 1.729808 |
| gene-AT4C  | 22.78893 | 23.29653 | 24.26586 | 21.60555 | 20.29838 | 21.6761  | 25.70071 | 26.50749 |
| gene-AT1C  | 0.758592 | 1.638008 | 1.160619 | 2.546389 | 2.48274  | 2.114462 | 1.135221 | 0.698815 |
| gene-AT3C  | 27.27269 | 27.20482 | 27.27656 | 34.55403 | 35.30827 | 33.41985 | 21.10017 | 20.18862 |
| gene-AT5C  | 4.629238 | 4.536159 | 4.180758 | 6.185098 | 5.864282 | 5.889686 | 5.685814 | 7.137032 |
| gene-AT1C  | 3.963775 | 3.84592  | 2.169265 | 1.195614 | 2.482897 | 1.535637 | 1.31077  | 0.596085 |
| gene-AT4C  | 24.09696 | 24.485   | 23.62045 | 22.24537 | 19.67831 | 21.15397 | 25.91093 | 27.5455  |
| gene-AT5C  | 2.596188 | 2.38441  | 2.693386 | 1.07681  | 0.626846 | 0.716563 | 0.453812 | 0.284463 |
| gene-AT5C  | 1.147207 | 0.934163 | 0.884806 | 1.108028 | 1.108896 | 1.204211 | 2.43626  | 2.74725  |
| gene-AT1C  | 11.56474 | 11.12493 | 10.66196 | 5.091682 | 5.613607 | 5.728484 | 3.943803 | 4.724367 |
| gene-AT3C  | 2.602398 | 2.951412 | 2.685295 | 4.403612 | 4.061842 | 3.303481 | 8.861417 | 10.51411 |
| gene-AT1C  | 2.290595 | 2.607855 | 2.089278 | 1.965618 | 2.048048 | 1.558498 | 0.760413 | 0.634779 |
| gene-AT4C  | 0.620085 | 0.657364 | 0.631024 | 0.761433 | 0.749451 | 0.629445 | 0.160954 | 0.139914 |
| gene-AT4C  | 0.542233 | 0.715333 | 1.531103 | 2.158993 | 2.935415 | 1.584461 | 0.968047 | 0.278402 |
| gene-AT5C  | 2.115207 | 1.609668 | 2.041736 | 2.660797 | 2.222382 | 1.653919 | 2.071614 | 1.118847 |
| gene-AT4C  | 142.487  | 138.5678 | 139.839  | 109.7188 | 112.114  | 110.7041 | 86.84545 | 85.87362 |
| gene-AT1C  | 1.497473 | 1.411591 | 0.980481 | 7.08463  | 7.861872 | 6.374814 | 2.529486 | 2.560647 |
| gene-AT1C  | 8.048662 | 9.208434 | 9.927667 | 16.78028 | 14.62198 | 16.3777  | 4.571966 | 4.454079 |
| gene-AT5C  | 1.006087 | 1.160798 | 0.759712 | 1.46187  | 1.700635 | 1.552564 | 2.200836 | 1.70053  |
| gene-AT5C  | 1.028432 | 0.71884  | 0.416398 | 2.813405 | 2.251867 | 2.531513 | 0.168611 | 0        |
| gene-AT3C  | 0.044052 | 0        | 0        | 0        | 0.044173 | 0.059837 | 0        | 0.087683 |
| gene-AT5C  | 3.56475  | 2.980441 | 3.496112 | 2.658629 | 2.134444 | 2.972922 | 8.670007 | 7.348969 |
| gene-AT5C  | 46.57493 | 41.72571 | 43.08999 | 94.80624 | 96.84007 | 92.85483 | 36.7196  | 36.83993 |
| gene-AT2C  | 28.29365 | 27.92246 | 30.02128 | 23.60547 | 23.64831 | 22.89967 | 31.57402 | 30.88345 |
| gene-AT5C  | 46.69354 | 46.19828 | 50.10076 | 60.28698 | 62.23767 | 62.5615  | 26.64363 | 29.44832 |
| gene-AT5C  | 9.549235 | 11.02936 | 11.66273 | 11.98886 | 10.36582 | 11.11566 | 23.41637 | 24.40868 |
| gene-AT5C  | 1.653665 | 2.181457 | 3.262474 | 2.21336  | 1.223426 | 2.054261 | 4.263684 | 4.593292 |
| gene-AT2C  | 13.98009 | 14.31462 | 13.15391 | 20.55305 | 17.82074 | 17.7696  | 4.770603 | 6.145845 |
| gene-AT1C  | 4.381741 | 3.163738 | 2.855338 | 9.454375 | 9.075354 | 8.510508 | 0.636132 | 0.736872 |
| gene-AT1C  | 0.245297 | 0.473056 | 0.207046 | 2.053345 | 2.146736 | 2.371665 | 0.421226 | 0.067135 |
| gene-AT5C  | 95.87131 | 89.35082 | 99.30299 | 40.68955 | 42.09724 | 39.75856 | 202.3447 | 206.2775 |
| gene-AT3C  | 109.8712 | 106.1354 | 104.6511 | 109.0762 | 100.5718 | 104.4513 | 208.1127 | 208.9966 |
| gene-AT1C  | 2.117207 | 1.986404 | 3.287835 | 0.811783 | 1.236156 | 0.848876 | 2.380975 | 2.096526 |
| gene-AT5C  | 6.87664  | 7.04763  | 8.147103 | 5.024535 | 7.03453  | 6.406657 | 8.873063 | 7.9072   |

|           |          |          |          |          |          |          |          |          |
|-----------|----------|----------|----------|----------|----------|----------|----------|----------|
| gene-AT1C | 2.022686 | 2.662887 | 1.494527 | 1.923377 | 2.08759  | 1.818788 | 3.317829 | 2.706984 |
| gene-AT1C | 10.40003 | 8.788158 | 10.33501 | 10.34895 | 10.06065 | 8.29542  | 12.16603 | 13.37355 |
| gene-AT1C | 4.776996 | 4.747343 | 4.898999 | 6.356846 | 5.877671 | 5.318536 | 5.141747 | 5.744532 |
| gene-AT3C | 9.456326 | 10.25672 | 10.03009 | 2.287657 | 2.513862 | 1.967839 | 2.008102 | 2.13774  |
| gene-AT1C | 2.44091  | 2.164446 | 1.573653 | 0.622801 | 0.399741 | 0.594021 | 0.806139 | 0.647042 |
| gene-AT3C | 21.29604 | 22.9874  | 23.19375 | 21.7128  | 19.67203 | 21.70364 | 17.21153 | 16.98456 |
| gene-AT1C | 30.5953  | 28.55477 | 29.69416 | 22.99226 | 21.99584 | 22.5186  | 17.52453 | 19.01094 |
| gene-AT5C | 164.0031 | 161.564  | 160.6622 | 118.4607 | 121.5425 | 123.1534 | 79.59632 | 83.06317 |
| gene-AT3C | 0.246248 | 0.237621 | 0.105664 | 1.215789 | 1.042904 | 1.086946 | 0.871587 | 0.111322 |
| gene-AT1C | 0.34697  | 0.121372 | 0.409731 | 0.377954 | 0.56919  | 0.104802 | 0.395253 | 0.958286 |
| gene-AT1C | 0.302491 | 0.524989 | 0.251646 | 1.058179 | 0.979348 | 0.896487 | 0.135332 | 0.262153 |
| gene-AT5C | 0.9059   | 0.542758 | 0.377026 | 0.485473 | 0.35919  | 0.758223 | 0.421155 | 0.343163 |
| gene-AT3C | 3.061699 | 2.771902 | 3.157476 | 3.891922 | 4.771312 | 4.748965 | 3.740046 | 4.11152  |
| gene-AT1C | 23.20997 | 23.12292 | 23.57878 | 31.76813 | 30.14443 | 29.89499 | 6.149627 | 6.911148 |
| gene-AT5C | 5.776053 | 6.290989 | 5.712705 | 2.035028 | 1.46062  | 2.253909 | 1.603187 | 2.734974 |
| gene-AT2C | 7.792184 | 7.973078 | 9.090479 | 10.23015 | 9.475169 | 10.112   | 5.51412  | 4.232025 |
| gene-AT3C | 5.551401 | 5.0742   | 6.254935 | 3.380572 | 3.348948 | 3.410803 | 1.548704 | 1.742199 |
| gene-AT5C | 10.476   | 10.12876 | 10.27523 | 7.497433 | 7.587708 | 7.250056 | 14.57375 | 14.10129 |
| gene-AT5C | 8.199107 | 7.994794 | 7.849226 | 6.490469 | 6.554461 | 6.388761 | 4.705749 | 6.063375 |
| gene-AT3C | 693.824  | 672.274  | 691.3985 | 817.1644 | 809.7452 | 802.042  | 601.6441 | 628.4165 |
| gene-AT3C | 2.502083 | 2.041135 | 2.786975 | 1.844072 | 1.495645 | 1.959822 | 3.27843  | 2.855103 |
| gene-AT5C | 4.390916 | 4.010363 | 5.276336 | 5.439538 | 5.114858 | 4.919561 | 0.816346 | 1.184538 |
| gene-AT1C | 0.994169 | 2.505854 | 1.350623 | 0.526816 | 0.416591 | 0.484448 | 1.619351 | 2.268362 |
| gene-AT1C | 3.293113 | 2.76349  | 2.598398 | 1.071381 | 0.738201 | 0.80269  | 2.012084 | 2.505534 |
| gene-AT1C | 3.28824  | 3.315799 | 3.580892 | 1.086759 | 1.08444  | 0.944233 | 0.979308 | 1.445472 |
| gene-AT1C | 1.791252 | 1.189782 | 1.357911 | 1.345107 | 1.681942 | 1.022128 | 0.416414 | 0.37256  |
| gene-AT3C | 0.334567 | 0.463636 | 0.306658 | 0.81216  | 0.953536 | 0.972884 | 0.095219 | 0.289083 |
| gene-AT1C | 40.47346 | 37.68958 | 39.42291 | 26.00589 | 28.13893 | 26.76862 | 30.17335 | 31.13721 |
| gene-AT1C | 6.249331 | 5.823747 | 6.069094 | 3.040871 | 3.660385 | 2.722178 | 0.40652  | 0.172414 |
| gene-AT1C | 0.762028 | 0.864344 | 0.604115 | 1.818428 | 1.296386 | 1.527589 | 0.190421 | 0.107973 |
| gene-AT1C | 76.48512 | 79.11717 | 79.65662 | 55.19555 | 58.24581 | 55.32483 | 61.43383 | 60.42047 |
| gene-AT1C | 0.890093 | 0.823735 | 0.662641 | 1.395304 | 1.293514 | 1.348526 | 0.594002 | 0.755852 |
| gene-AT1C | 2.051593 | 1.753535 | 2.144454 | 2.802592 | 3.020355 | 2.97105  | 2.883401 | 3.262    |
| gene-AT3C | 2.092729 | 2.156288 | 2.249263 | 3.453183 | 2.676239 | 3.144042 | 1.48726  | 1.980496 |
| gene-AT2C | 2.097076 | 2.320457 | 3.053278 | 2.977266 | 3.657105 | 3.314404 | 2.139765 | 1.35401  |
| gene-AT5C | 3.130301 | 2.856004 | 3.343652 | 1.777668 | 2.966754 | 2.657605 | 4.111304 | 3.157937 |
| gene-AT5C | 3.901615 | 3.961481 | 3.587036 | 3.090424 | 3.346863 | 3.016558 | 4.975349 | 5.030278 |
| gene-AT5C | 3.247827 | 4.497549 | 3.951708 | 7.406085 | 7.546949 | 6.490291 | 2.034189 | 2.203134 |
| gene-AT5C | 19.267   | 19.68935 | 20.57339 | 14.0792  | 14.66053 | 14.461   | 33.90645 | 34.08685 |
| gene-AT1C | 2.230223 | 1.704185 | 2.083605 | 2.949426 | 2.661825 | 2.960675 | 1.105368 | 1.356408 |
| gene-AT2C | 95.21428 | 102.1229 | 93.34726 | 71.48248 | 70.95705 | 68.80828 | 193.7013 | 176.9071 |
| gene-AT2C | 0.841656 | 1.053392 | 0.69786  | 0.920677 | 1.199538 | 0.961341 | 0.479062 | 0.374914 |
| gene-AT4C | 5.152063 | 4.136375 | 4.227882 | 5.972437 | 6.84197  | 5.970992 | 2.436323 | 2.26969  |
| gene-AT2C | 3.943043 | 5.253574 | 4.261355 | 0.870738 | 1.69857  | 1.672007 | 13.1806  | 10.80922 |
| gene-AT3C | 18.36321 | 19.66941 | 17.54358 | 15.16248 | 15.26014 | 15.9168  | 27.13253 | 32.18924 |
| gene-AT1C | 137.9293 | 130.0644 | 146.6379 | 164.8518 | 157.5595 | 151.465  | 108.9527 | 109.1669 |
| gene-AT1C | 31.51429 | 32.91486 | 32.31337 | 20.05331 | 20.07134 | 24.92535 | 45.4501  | 47.28869 |
| gene-AT3C | 51.08991 | 46.47235 | 45.66694 | 160.9943 | 159.875  | 153.272  | 17.99115 | 16.67214 |
| gene-AT4C | 1.400369 | 2.394114 | 3.224331 | 0.63365  | 0.690468 | 0.47984  | 2.290908 | 1.89992  |
| gene-AT2C | 1.980052 | 1.822036 | 2.238644 | 3.198021 | 2.65262  | 3.370443 | 2.100957 | 2.996121 |
| gene-AT3C | 4.464215 | 2.724658 | 3.03226  | 6.313717 | 5.826266 | 4.49539  | 1.538841 | 1.292747 |

|            |          |          |          |          |          |          |          |          |
|------------|----------|----------|----------|----------|----------|----------|----------|----------|
| gene-AT5C  | 0.857224 | 0.662788 | 1.270672 | 1.035481 | 0.925185 | 0.738276 | 0.727708 | 0.93045  |
| gene-AT4C  | 2.558647 | 3.377418 | 2.754381 | 3.83539  | 4.125388 | 3.275143 | 6.044371 | 5.677518 |
| gene-AT1C  | 0.676736 | 0.741443 | 0.788883 | 1.972215 | 1.595661 | 1.990927 | 1.053864 | 1.170364 |
| gene-AT4C  | 1.639174 | 1.030427 | 0.831932 | 0.917357 | 0.8813   | 0.656272 | 2.082074 | 1.849648 |
| gene-AT3C  | 22.38234 | 18.64814 | 17.93535 | 46.16172 | 45.98013 | 46.26897 | 17.82595 | 16.62568 |
| gene-AT1C  | 31.05815 | 33.06661 | 31.0951  | 87.15031 | 86.17004 | 90.85333 | 40.49527 | 38.43126 |
| gene-AT3C  | 0.52045  | 0.779327 | 0.343057 | 1.858413 | 1.791655 | 2.221445 | 0.95682  | 1.265312 |
| gene-AT5C  | 1.100483 | 1.076875 | 1.361717 | 0.64445  | 0.599928 | 1.061728 | 2.048193 | 3.08887  |
| gene-AT2C  | 243.4406 | 241.9073 | 244.6799 | 232.4005 | 230.9733 | 222.0745 | 123.8445 | 128.7215 |
| gene-AT5C  | 18.62842 | 18.98982 | 18.38726 | 14.35687 | 15.11212 | 12.99961 | 27.90306 | 26.80827 |
| gene-AT5C  | 2.088627 | 2.454568 | 3.025604 | 5.218052 | 3.778846 | 5.013587 | 3.692099 | 3.673205 |
| gene-AT5C  | 3.209918 | 2.569532 | 2.982648 | 1.710254 | 1.234535 | 1.725898 | 0.945125 | 0.821415 |
| gene-AT1C  | 0.208361 | 0.417778 | 0.359137 | 0.776796 | 0.791125 | 0.970316 | 0.286477 | 0.271451 |
| gene-AT1C  | 0        | 0.339054 | 0        | 0.603458 | 1.020674 | 0.755339 | 1.032018 | 1.083925 |
| Arabidopsi | 0.618119 | 0.765879 | 0.920534 | 0.235676 | 0.58705  | 0.285483 | 0.937623 | 1.174722 |
| Arabidopsi | 3.863186 | 2.565056 | 2.557884 | 1.459046 | 1.838408 | 1.224376 | 1.394074 | 0.885201 |
| gene-AT5C  | 1.041841 | 1.339057 | 1.674119 | 1.287316 | 1.048734 | 1.354638 | 0.42056  | 0.620308 |
| gene-AT4C  | 0.17631  | 0.348749 | 0.648905 | 0.411017 | 0.445242 | 0.637268 | 0.203946 | 0.377178 |
| gene-AT1C  | 6.13028  | 3.38696  | 4.76465  | 2.82911  | 2.66899  | 2.065222 | 10.03841 | 12.37876 |
| gene-AT5C  | 10.34103 | 13.75687 | 12.70991 | 16.23764 | 17.01066 | 15.71062 | 5.525351 | 4.745456 |
| gene-AT3C  | 2.491826 | 3.290091 | 2.247258 | 33.22155 | 33.91488 | 30.1974  | 2.231455 | 1.870206 |
| gene-AT5C  | 10.62686 | 8.91466  | 8.475427 | 2.764832 | 3.815476 | 3.166679 | 11.06304 | 9.886593 |
| gene-AT3C  | 5.977205 | 5.207052 | 5.404884 | 4.920891 | 5.826297 | 4.78859  | 7.71131  | 5.915103 |
| gene-AT5C  | 29.70242 | 27.66264 | 28.45563 | 20.29881 | 19.91148 | 20.18521 | 1.614077 | 2.376079 |
| gene-AT3C  | 0.972315 | 0.796375 | 1.116138 | 0.945997 | 1.488261 | 1.034322 | 0.201191 | 0.249465 |
| gene-AT5C  | 17.49218 | 19.53965 | 16.62033 | 9.802566 | 11.27068 | 9.282943 | 3.841602 | 4.112511 |
| gene-AT1C  | 11.70412 | 11.755   | 11.61356 | 9.843477 | 8.51568  | 10.41421 | 23.06709 | 24.46538 |
| gene-AT3C  | 1.474292 | 1.277336 | 1.366867 | 1.191666 | 1.486846 | 1.841953 | 0.342897 | 0.873319 |
| gene-AT1C  | 6.133294 | 4.378919 | 6.21035  | 5.688471 | 6.95764  | 6.371917 | 11.92102 | 12.21256 |
| gene-AT3C  | 14.54083 | 12.20257 | 11.85058 | 14.95931 | 15.69849 | 13.90723 | 8.310627 | 8.829505 |
| gene-AT4C  | 8.560255 | 7.968248 | 9.684079 | 2.631057 | 3.853046 | 3.752659 | 7.248131 | 6.71326  |
| gene-AT3C  | 521.0189 | 518.2161 | 526.3101 | 179.4763 | 177.0753 | 171.6006 | 681.9174 | 702.2395 |
| gene-AT4C  | 6.04388  | 7.143271 | 7.257442 | 10.55223 | 10.77989 | 11.78374 | 11.37527 | 13.03793 |
| gene-AT3C  | 29.03829 | 29.81353 | 28.856   | 34.77135 | 36.63002 | 33.44449 | 15.06305 | 14.45627 |
| gene-AT3C  | 115.1035 | 112.1084 | 109.3634 | 71.1413  | 66.21785 | 68.00613 | 201.0217 | 196.5369 |
| gene-AT5C  | 0.454265 | 0.618113 | 0.360369 | 1.086529 | 1.450297 | 1.360372 | 0.382238 | 0.129875 |
| gene-AT5C  | 1237.749 | 1217.609 | 1241.041 | 826.325  | 822.4302 | 818.6679 | 1816.762 | 1903.607 |
| gene-AT3C  | 9.378629 | 8.162766 | 8.37514  | 9.770128 | 9.035013 | 8.279655 | 13.55344 | 13.58299 |
| gene-AT4C  | 173.3184 | 177.0627 | 175.2199 | 637.2669 | 658.5274 | 659.4076 | 51.80163 | 54.64513 |
| gene-AT3C  | 12.21531 | 12.6145  | 10.18194 | 13.31936 | 15.09553 | 15.53882 | 16.30211 | 15.00763 |
| gene-AT1C  | 0.721173 | 1.153153 | 1.396547 | 2.521562 | 2.004995 | 1.422082 | 0.598714 | 1.223986 |
| gene-AT1C  | 37.68268 | 41.32642 | 42.21076 | 39.78641 | 37.27137 | 37.74711 | 20.50885 | 22.11267 |
| gene-AT4C  | 2.06982  | 1.571064 | 1.556609 | 1.607193 | 1.997146 | 2.207375 | 1.069522 | 0.760539 |
| gene-AT2C  | 12.30091 | 11.70443 | 12.39248 | 11.83981 | 13.75459 | 11.64266 | 22.24991 | 24.36919 |
| gene-AT3C  | 4.344575 | 4.007878 | 4.779713 | 4.859682 | 5.02188  | 5.461334 | 5.257074 | 6.025767 |
| gene-AT1C  | 0.421636 | 0.301836 | 0.720562 | 1.173435 | 1.454907 | 1.5089   | 1.015885 | 0.619874 |
| gene-AT4C  | 7.352543 | 8.353644 | 7.972309 | 12.01405 | 11.3772  | 12.45541 | 4.03421  | 4.111948 |
| gene-AT1C  | 1.312026 | 1.5645   | 1.033853 | 2.835972 | 1.271719 | 1.289333 | 1.869799 | 1.645921 |
| gene-AT3C  | 0.198875 | 0.285146 | 0.685764 | 1.248706 | 0.969249 | 1.431608 | 0.449276 | 0.597495 |
| gene-AT1C  | 91.52405 | 89.8068  | 91.1666  | 57.26832 | 58.18918 | 59.35939 | 87.40673 | 88.38605 |
| gene-AT3C  | 96.81947 | 94.27696 | 96.24715 | 146.6226 | 141.1244 | 145.2034 | 151.9485 | 159.8069 |

|           |          |          |          |          |          |          |          |          |
|-----------|----------|----------|----------|----------|----------|----------|----------|----------|
| gene-AT5C | 1.734167 | 1.574091 | 1.546575 | 2.208422 | 2.041796 | 2.21408  | 1.553062 | 1.65947  |
| gene-AT4C | 7.673769 | 6.760446 | 7.320251 | 7.292629 | 8.337397 | 8.05739  | 10.26586 | 8.249938 |
| gene-AT1C | 4.103181 | 4.770422 | 4.616758 | 5.090741 | 4.007199 | 4.853798 | 5.644537 | 7.097602 |
| gene-AT1C | 1115.675 | 1161.606 | 1115.054 | 969.2273 | 961.3716 | 999.1694 | 1134.449 | 1080.646 |
| gene-AT5C | 8.022302 | 6.952044 | 7.938923 | 6.322572 | 6.759897 | 7.685315 | 3.290438 | 2.447447 |
| gene-AT3C | 0.698835 | 0.524513 | 0.614185 | 1.191089 | 1.037819 | 1.080351 | 0.286368 | 0.351586 |
| gene-AT5C | 5.913958 | 5.812519 | 6.366498 | 8.291656 | 8.719708 | 8.439713 | 3.396096 | 3.019225 |
| gene-AT2C | 0.938997 | 0.891174 | 0.93388  | 0.944828 | 0.531102 | 0.807058 | 0.315407 | 0.392563 |
| gene-AT1C | 2.152964 | 3.137592 | 2.61945  | 3.132186 | 3.95784  | 2.429973 | 1.610411 | 0.845651 |
| gene-AT5C | 9.139867 | 9.288039 | 9.061311 | 7.106439 | 8.196998 | 7.474182 | 9.003047 | 9.218809 |
| gene-AT2C | 20.33728 | 16.91085 | 18.4448  | 52.35277 | 56.65503 | 51.14605 | 19.33089 | 19.43528 |
| gene-AT2C | 2.671041 | 2.758237 | 2.460371 | 6.024973 | 5.168213 | 6.034298 | 2.270368 | 2.263451 |
| gene-AT5C | 30.33553 | 27.64103 | 28.29062 | 18.66575 | 19.08836 | 17.13891 | 2.729103 | 2.379169 |
| gene-AT4C | 10.929   | 10.07341 | 10.05185 | 14.27533 | 13.88307 | 14.27895 | 13.66479 | 15.64325 |
| gene-AT2C | 20.27594 | 20.85106 | 22.46322 | 18.57684 | 18.94105 | 16.90195 | 3.168976 | 2.56188  |
| gene-AT1C | 56.10383 | 61.81625 | 61.30994 | 76.16426 | 82.72951 | 99.2578  | 3.616424 | 2.833172 |
| gene-AT1C | 0.283105 | 0.468498 | 0.29757  | 0.790741 | 1.101852 | 1.299042 | 0.04115  | 0.103555 |
| gene-AT2C | 2.955013 | 3.16096  | 3.709799 | 8.050505 | 8.42058  | 7.941311 | 7.334805 | 7.744752 |
| gene-AT5C | 20.27204 | 19.87285 | 20.00729 | 11.433   | 12.34304 | 10.55836 | 29.39876 | 28.36065 |
| gene-AT5C | 23.52684 | 19.84628 | 22.10841 | 79.99243 | 78.32935 | 74.78868 | 30.49661 | 31.21173 |
| gene-AT5C | 229.9598 | 233.1319 | 232.1944 | 140.7447 | 136.7153 | 140.5996 | 139.4679 | 147.802  |
| gene-AT5C | 19.58431 | 20.18839 | 21.50781 | 13.06034 | 13.27954 | 11.81427 | 62.25422 | 61.93629 |
| gene-AT5C | 0.405581 | 0.499254 | 0.556917 | 0.83487  | 0.99816  | 0.65919  | 1.202857 | 0.94217  |
| gene-AT3C | 4.342356 | 4.357418 | 4.985608 | 2.305734 | 1.911437 | 2.076385 | 1.796514 | 1.909923 |
| gene-AT1C | 17.1514  | 14.81597 | 17.28031 | 8.968966 | 9.06013  | 9.05907  | 3.510621 | 1.897078 |
| gene-AT1C | 3.210145 | 2.49376  | 3.332705 | 7.858842 | 8.870286 | 9.102605 | 4.236135 | 4.462945 |
| gene-AT1C | 7.531818 | 7.758603 | 7.453339 | 6.806341 | 7.157477 | 6.763382 | 7.032195 | 8.259661 |
| gene-AT4C | 4.815381 | 5.520474 | 4.615345 | 5.548748 | 5.34679  | 5.91678  | 3.81032  | 3.833328 |
| gene-AT5C | 2.884711 | 3.050554 | 3.264447 | 0.874077 | 1.123054 | 1.031386 | 3.034634 | 4.701766 |
| gene-AT4C | 108.4559 | 100.4363 | 105.6452 | 238.8499 | 224.7566 | 233.1352 | 10.88717 | 13.09665 |
| gene-AT2C | 30.43611 | 28.80962 | 26.69566 | 13.71446 | 11.51709 | 12.12066 | 5.567839 | 6.404369 |
| gene-AT4C | 127.2975 | 126.0677 | 127.3725 | 547.0016 | 533.6712 | 536.8235 | 95.04995 | 93.23953 |
| gene-AT3C | 0.329399 | 0.089301 | 0.441342 | 0.043663 | 0.084697 | 0.15422  | 2.627783 | 4.013739 |
| gene-AT3C | 10.144   | 10.09691 | 11.41189 | 40.09082 | 39.97695 | 37.89918 | 10.41051 | 10.14632 |
| gene-AT4C | 7.049797 | 7.557999 | 7.135975 | 4.13502  | 3.790362 | 3.539052 | 11.47319 | 10.74435 |
| gene-AT4C | 0.822947 | 0.858384 | 1.095612 | 1.98813  | 2.278301 | 2.378397 | 0.573056 | 0.882761 |
| gene-AT4C | 30.23989 | 27.63597 | 29.28465 | 28.15346 | 25.30105 | 27.01844 | 23.76165 | 24.45986 |
| gene-AT5C | 5.044354 | 5.695024 | 5.066258 | 3.819108 | 3.652447 | 4.716624 | 8.829813 | 9.35203  |
| gene-AT1C | 1.496853 | 2.215993 | 1.823957 | 0.433629 | 0.573826 | 0.511074 | 0.829862 | 0.378679 |
| gene-AT2C | 12.66039 | 12.54036 | 11.19903 | 6.884985 | 6.7455   | 7.346395 | 7.234264 | 7.253645 |
| gene-AT2C | 12.32255 | 12.41388 | 11.4266  | 15.98599 | 14.63534 | 15.5245  | 16.21128 | 9.60877  |
| gene-AT3C | 1.373921 | 1.916467 | 0.914104 | 1.07096  | 0.844664 | 0.694163 | 2.746452 | 3.934439 |
| gene-AT5C | 0.579643 | 0.265317 | 0.453474 | 0.517012 | 0.432992 | 0.51621  | 0.134524 | 0.136253 |
| gene-AT4C | 9.775249 | 11.53569 | 10.17172 | 20.7049  | 21.75081 | 21.199   | 9.271795 | 8.544803 |
| gene-AT5C | 2.901791 | 4.644878 | 3.293365 | 4.28003  | 4.485253 | 3.179492 | 1.696642 | 1.536968 |
| gene-AT4C | 31.15685 | 28.99338 | 33.79508 | 29.36355 | 28.12619 | 27.36224 | 40.12516 | 37.14883 |
| gene-AT4C | 20.34685 | 20.36778 | 22.34273 | 17.59392 | 15.75627 | 15.15387 | 8.366341 | 9.353645 |
| gene-AT5C | 13.49916 | 12.20315 | 13.90284 | 4.870124 | 4.705156 | 3.792049 | 2.929751 | 2.54643  |
| gene-AT1C | 16.29384 | 14.66029 | 16.55511 | 18.58786 | 19.26085 | 19.08166 | 11.28064 | 10.21861 |
| gene-AT3C | 19.07133 | 21.81135 | 20.04439 | 12.56999 | 12.50961 | 13.51452 | 6.343275 | 6.557549 |
| gene-AT3C | 8.212046 | 7.937135 | 7.064272 | 15.07722 | 15.73048 | 13.8427  | 3.255266 | 3.630877 |

|            |          |          |          |          |          |          |          |          |
|------------|----------|----------|----------|----------|----------|----------|----------|----------|
| gene-AT1C  | 1.010757 | 1.267307 | 0.793263 | 1.532152 | 1.34219  | 1.202059 | 0.117561 | 0.147667 |
| gene-AT5C  | 0.339399 | 0.437051 | 0.319194 | 0.337484 | 0.201452 | 0.271679 | 0.904715 | 0.748351 |
| gene-AT1C  | 0.949221 | 1.119449 | 0.904999 | 0.598644 | 0.75829  | 1.05254  | 0.274806 | 0.321189 |
| gene-AT5C  | 0.721982 | 1.103317 | 0.562812 | 1.263785 | 1.085575 | 1.500274 | 0.466592 | 0.937836 |
| gene-AT1C  | 19.73749 | 22.09328 | 20.94767 | 15.48303 | 15.00836 | 14.85101 | 6.336944 | 6.22102  |
| gene-AT5C  | 60.15998 | 65.9838  | 61.47634 | 68.03979 | 62.76357 | 66.52285 | 17.35253 | 19.01015 |
| gene-AT1C  | 7.604948 | 7.415544 | 7.253892 | 8.73459  | 8.571335 | 7.848391 | 7.008463 | 7.508874 |
| gene-AT1C  | 1.718519 | 1.657628 | 1.393814 | 0.931311 | 0.836771 | 0.662811 | 1.842632 | 1.841614 |
| gene-AT5C  | 22.74594 | 22.73121 | 25.70573 | 11.02282 | 9.43698  | 10.45201 | 16.68117 | 17.34599 |
| gene-AT5C  | 46.37777 | 46.39987 | 31.75458 | 39.21763 | 36.76    | 35.51602 | 44.09592 | 74.61376 |
| gene-AT3C  | 149.8558 | 144.4976 | 145.8908 | 141.4161 | 140.7881 | 142.3444 | 53.68987 | 54.21942 |
| gene-AT3C  | 6.102805 | 4.828959 | 4.742184 | 6.366405 | 5.347004 | 6.111265 | 2.183393 | 1.613609 |
| gene-AT2C  | 4.305241 | 4.241756 | 4.201118 | 4.455795 | 4.983708 | 4.196614 | 4.415858 | 3.986141 |
| gene-AT2C  | 4.670228 | 5.738393 | 4.890924 | 3.44803  | 3.526362 | 4.368609 | 8.512585 | 7.057281 |
| gene-AT3C  | 27.52802 | 26.78825 | 27.16438 | 15.96618 | 15.86932 | 14.76162 | 22.23028 | 24.01696 |
| gene-AT4C  | 23.8537  | 25.87902 | 23.07971 | 4.553789 | 5.528848 | 4.554935 | 4.591474 | 5.323962 |
| gene-AT3C  | 8.702559 | 8.905832 | 7.600507 | 7.657778 | 8.170114 | 7.376807 | 10.25289 | 10.78464 |
| gene-AT2C  | 21.42708 | 22.19816 | 24.8261  | 17.95344 | 18.81794 | 17.12303 | 26.68398 | 27.99012 |
| gene-AT5C  | 167.0663 | 165.9264 | 168.2965 | 358.0541 | 362.4655 | 358.8688 | 76.39188 | 78.82142 |
| Arabidopsi | 1.254227 | 0.59543  | 1.470147 | 1.004462 | 0.463912 | 0.931932 | 0.121689 | 0.864992 |
| gene-AT1C  | 4.200779 | 3.683241 | 4.093879 | 4.145974 | 3.422362 | 3.306515 | 8.430553 | 8.26598  |
| gene-AT3C  | 87.77758 | 94.48407 | 87.58422 | 70.6667  | 75.77119 | 75.37559 | 93.27628 | 87.86697 |
| gene-AT1C  | 6.263814 | 5.777029 | 5.655548 | 5.89361  | 5.391288 | 5.377109 | 8.383174 | 8.396376 |
| gene-AT2C  | 11.53911 | 11.48727 | 10.41766 | 12.09752 | 13.83553 | 12.25638 | 14.55342 | 16.06401 |
| gene-AT2C  | 8.51689  | 8.701289 | 9.815369 | 14.136   | 13.09993 | 12.6691  | 3.404582 | 4.32201  |
| gene-AT5C  | 6.279561 | 5.815114 | 6.012454 | 2.900999 | 3.359235 | 3.198581 | 0.742294 | 0.732462 |
| gene-AT5C  | 5.13877  | 5.666293 | 4.906832 | 7.984276 | 9.396462 | 8.180247 | 0.408897 | 0.351451 |
| gene-AT2C  | 265.2072 | 255.2613 | 266.1635 | 195.0837 | 193.489  | 200.6032 | 83.44585 | 86.86822 |
| gene-AT2C  | 47.24389 | 42.15599 | 45.48965 | 26.35286 | 28.35171 | 30.626   | 76.14164 | 79.48706 |
| gene-AT5C  | 3.636622 | 2.997276 | 3.871899 | 1.88516  | 2.108127 | 1.609637 | 3.290767 | 3.790808 |
| gene-AT2C  | 0.510716 | 1.309406 | 0.246126 | 0.473254 | 0.317755 | 0.377529 | 2.080757 | 2.103462 |
| gene-AT5C  | 26.94657 | 27.83758 | 27.41036 | 2.788267 | 3.349473 | 3.01277  | 18.44925 | 17.81514 |
| gene-AT1C  | 14.22366 | 15.24104 | 15.41468 | 9.289077 | 10.25663 | 8.908769 | 2.836915 | 3.58345  |
| gene-AT3C  | 2.143535 | 1.87987  | 2.115592 | 23.3166  | 23.662   | 25.71226 | 0.816819 | 0.863747 |
| gene-AT5C  | 2.177313 | 2.460204 | 2.364793 | 3.686386 | 4.223375 | 2.910966 | 4.966998 | 6.469893 |
| gene-AT2C  | 2.261482 | 2.332276 | 2.712184 | 1.757284 | 1.33333  | 1.251418 | 3.307239 | 2.369246 |
| gene-AT4C  | 55.2913  | 54.91902 | 55.16965 | 71.02297 | 73.70638 | 73.99706 | 119.3879 | 122.2287 |
| gene-AT5C  | 39.0568  | 37.20246 | 41.14166 | 23.83703 | 24.99677 | 24.77272 | 43.88868 | 51.28148 |
| gene-AT1C  | 17.89098 | 18.71865 | 18.52549 | 17.11444 | 14.37853 | 16.6055  | 33.76817 | 35.54769 |
| gene-AT1C  | 3.346832 | 3.444711 | 3.556289 | 2.80345  | 2.396921 | 2.081137 | 4.874345 | 3.821063 |
| gene-AT5C  | 39.8526  | 39.91427 | 39.4685  | 29.57436 | 33.40302 | 29.35116 | 79.77628 | 83.52801 |
| gene-AT3C  | 0.728856 | 0.800761 | 0.858096 | 0.562042 | 0.584571 | 0.441622 | 3.099676 | 2.074296 |
| gene-AT4C  | 2.067469 | 3.119456 | 2.750205 | 4.475162 | 4.713233 | 4.7056   | 0.689081 | 1.234684 |
| gene-AT1C  | 126.636  | 123.7506 | 129.0731 | 84.349   | 80.04406 | 80.08985 | 234.8028 | 254.2773 |
| gene-AT1C  | 6.197977 | 5.914098 | 6.924834 | 6.786076 | 7.143176 | 6.140203 | 8.769347 | 8.272003 |
| gene-AT3C  | 3.075319 | 2.584942 | 2.957679 | 2.108908 | 0.862468 | 1.665965 | 0.425119 | 0.988898 |
| gene-AT5C  | 33.95891 | 34.11555 | 37.44178 | 13.46408 | 11.8433  | 12.96833 | 65.19278 | 66.98038 |
| gene-AT1C  | 3.872318 | 2.922247 | 4.163579 | 0.320139 | 0.516416 | 0.951284 | 4.345367 | 6.70154  |
| gene-AT3C  | 142.5883 | 135.4814 | 138.4121 | 68.9588  | 69.68983 | 66.76012 | 231.2799 | 239.795  |
| gene-AT4C  | 16.7218  | 18.74811 | 19.55519 | 7.841954 | 8.351357 | 8.281923 | 6.432068 | 5.793584 |
| gene-AT1C  | 2.473572 | 1.538526 | 1.992141 | 2.872778 | 2.365769 | 2.523672 | 1.159247 | 1.455753 |

|           |          |          |          |          |          |          |          |          |
|-----------|----------|----------|----------|----------|----------|----------|----------|----------|
| gene-AT1C | 8.3937   | 7.024339 | 8.119734 | 6.967874 | 6.989586 | 6.981835 | 3.136274 | 2.822117 |
| gene-AT3C | 8.486611 | 3.123296 | 7.030106 | 7.343687 | 10.39797 | 15.06029 | 6.600762 | 4.204544 |
| gene-AT4C | 1.221466 | 0.874633 | 1.040145 | 1.167721 | 1.457837 | 1.585268 | 0.299954 | 0.265241 |
| gene-AT5C | 0.860502 | 0.639197 | 0.786943 | 1.835141 | 1.383886 | 1.45928  | 0.237193 | 0.25241  |
| gene-AT3C | 1.962796 | 1.560383 | 1.484615 | 4.569942 | 3.922766 | 3.849385 | 1.171588 | 1.209173 |
| gene-AT1C | 3.704933 | 2.956611 | 3.581994 | 2.940004 | 3.501354 | 2.773854 | 2.286348 | 2.280785 |
| gene-AT1C | 10.18384 | 9.759194 | 8.157684 | 3.310535 | 4.49436  | 3.535443 | 5.096198 | 4.500296 |
| gene-AT3C | 61.06908 | 58.98431 | 59.41993 | 34.19853 | 35.67175 | 34.57835 | 88.11942 | 84.11723 |
| gene-AT2C | 21.7143  | 20.41111 | 22.03295 | 14.58306 | 12.82516 | 15.32332 | 33.77292 | 37.04507 |
| gene-AT4C | 8.631239 | 11.45239 | 11.65916 | 14.29415 | 13.5189  | 14.19377 | 5.374014 | 4.06192  |
| gene-AT1C | 11.66757 | 10.71841 | 11.66455 | 8.32884  | 7.759483 | 8.445729 | 14.06727 | 14.54994 |
| gene-AT3C | 157.2527 | 161.8256 | 148.889  | 103.5223 | 99.00561 | 98.37245 | 281.1304 | 272.4938 |
| gene-AT5C | 0.331184 | 0.472412 | 0.205394 | 0.236755 | 0.36769  | 0        | 0.70064  | 0.766833 |
| gene-AT3C | 2.107368 | 2.940356 | 2.52033  | 2.848408 | 2.439544 | 2.000558 | 2.591258 | 3.796083 |
| gene-AT2C | 17.66423 | 17.75887 | 18.71319 | 30.84966 | 31.66715 | 29.59447 | 13.64083 | 13.69325 |
| gene-AT1C | 33.72496 | 37.69901 | 28.0677  | 50.89074 | 52.02704 | 56.03045 | 66.50433 | 54.62183 |
| gene-AT3C | 28.50728 | 27.36088 | 31.14036 | 22.90377 | 23.22455 | 24.68752 | 39.02709 | 44.50806 |
| gene-AT4C | 3.250004 | 4.156548 | 4.835157 | 5.344138 | 5.286293 | 5.05281  | 0.440534 | 0.217155 |
| gene-AT4C | 1.534354 | 1.731469 | 1.91758  | 2.348686 | 2.26413  | 2.027496 | 2.499251 | 2.562105 |
| gene-AT1C | 16.76653 | 16.05056 | 18.40118 | 56.26409 | 57.27007 | 54.79099 | 2.284311 | 2.170027 |
| gene-AT1C | 0.950235 | 0.785413 | 0.742952 | 0.314077 | 0.583016 | 0.522531 | 1.489855 | 1.637306 |
| gene-AT3C | 45.96814 | 44.7406  | 44.93291 | 41.52262 | 42.20951 | 42.41493 | 9.733034 | 10.79189 |
| gene-AT5C | 0.4193   | 0.428162 | 0.760024 | 0.660827 | 1.026978 | 1.091623 | 0.29396  | 0.514469 |
| gene-AT5C | 0.1031   | 0.13134  | 0.149347 | 0.304803 | 0.509033 | 0.486193 | 0.071556 | 0.016752 |
| gene-AT3C | 2.567533 | 2.652294 | 2.339879 | 3.883404 | 4.124779 | 3.698982 | 0.788921 | 1.224787 |
| gene-AT5C | 1.805222 | 2.300734 | 1.48775  | 1.889017 | 1.028311 | 1.96652  | 0.899855 | 1.680477 |
| gene-AT1C | 49.84031 | 49.30939 | 48.73161 | 29.93569 | 29.48023 | 27.60735 | 86.14311 | 86.03368 |
| gene-AT3C | 35.45291 | 32.57594 | 32.34405 | 90.16904 | 92.26657 | 86.8371  | 58.29597 | 60.05592 |
| gene-AT4C | 0.71908  | 0.594577 | 0.547844 | 0.615423 | 1.596432 | 1.534054 | 0.448972 | 0.135916 |
| gene-AT4C | 4.286048 | 4.90196  | 4.428185 | 2.970301 | 2.646953 | 3.156901 | 7.200513 | 7.550467 |
| gene-AT1C | 1.606476 | 1.996539 | 1.973573 | 2.76105  | 2.351195 | 2.465638 | 0.421759 | 0.382842 |
| gene-AT2C | 4.148656 | 4.953218 | 4.477548 | 1.824943 | 2.026002 | 2.007583 | 8.531384 | 10.62023 |
| gene-AT1C | 20.42651 | 22.05044 | 21.05098 | 17.51611 | 17.35396 | 17.82351 | 26.85989 | 30.80672 |
| gene-AT1C | 6.159346 | 5.935658 | 6.15171  | 4.079973 | 3.886386 | 3.823381 | 5.675316 | 6.509886 |
| gene-AT1C | 3.193167 | 3.680316 | 3.276413 | 2.824836 | 2.558547 | 2.933132 | 3.948813 | 4.375015 |
| gene-AT2C | 30.36326 | 30.57659 | 31.02148 | 18.10016 | 18.56965 | 17.69519 | 100.4719 | 104.6527 |
| gene-AT5C | 5.893586 | 6.010399 | 5.528387 | 3.353812 | 4.134798 | 3.266576 | 3.223886 | 1.99208  |
| gene-AT2C | 40.42043 | 38.46532 | 36.09498 | 61.33811 | 64.90403 | 60.15752 | 20.50973 | 17.83942 |
| gene-AT1C | 4.267029 | 3.577276 | 4.142337 | 4.387377 | 4.693143 | 4.710662 | 4.54442  | 5.249083 |
| gene-AT5C | 4.593029 | 4.738317 | 3.756614 | 4.273885 | 3.565571 | 4.421607 | 4.015156 | 4.089282 |
| gene-AT5C | 17.22747 | 17.67662 | 19.3675  | 16.02358 | 15.85988 | 14.21592 | 61.53843 | 62.66183 |
| gene-AT2C | 0        | 0.431338 | 0.117816 | 1.769699 | 0.874528 | 1.996534 | 0.166092 | 0        |
| gene-AT1C | 33.59691 | 35.68423 | 31.42113 | 23.03244 | 20.83942 | 23.49162 | 4.918375 | 5.167261 |
| gene-AT5C | 0.263432 | 0.223848 | 0.35259  | 0.389445 | 0.399676 | 0.248159 | 0.352002 | 0.438515 |
| gene-AT1C | 13.67236 | 11.71472 | 12.13971 | 17.14521 | 16.47264 | 17.94953 | 8.721432 | 9.21035  |
| gene-AT4C | 20.38998 | 21.69591 | 19.62147 | 19.97286 | 19.86949 | 19.67882 | 27.40606 | 28.64395 |
| gene-AT2C | 7.325321 | 9.84769  | 7.871688 | 40.28011 | 40.0455  | 39.67598 | 6.991845 | 8.660667 |
| gene-AT4C | 6.28304  | 6.592692 | 8.056943 | 8.042343 | 8.727654 | 9.940784 | 5.872928 | 7.842268 |
| gene-AT3C | 0.788852 | 0.616194 | 0.809307 | 0.516921 | 0.627849 | 0.520126 | 1.049413 | 1.083104 |
| gene-AT1C | 2.207482 | 2.6295   | 3.889395 | 0        | 0        | 0        | 5.493049 | 5.556019 |
| gene-AT1C | 2.815713 | 1.811369 | 1.681862 | 1.804012 | 0.844964 | 1.39017  | 1.912109 | 2.091153 |

|            |          |          |          |          |          |          |          |          |
|------------|----------|----------|----------|----------|----------|----------|----------|----------|
| gene-AT2C  | 5.340575 | 5.51335  | 5.909423 | 2.373749 | 2.278879 | 3.303586 | 7.738119 | 8.809521 |
| gene-AT3C  | 1.024819 | 1.275295 | 1.109915 | 1.32174  | 1.487063 | 1.564314 | 0.523905 | 0.085032 |
| gene-AT3C  | 11.93245 | 13.40461 | 11.79743 | 9.368828 | 9.418815 | 8.706738 | 4.347934 | 4.665251 |
| gene-AT1C  | 3.465377 | 4.149755 | 4.379022 | 2.26247  | 2.086575 | 2.244779 | 4.482851 | 4.696601 |
| gene-AT4C  | 0.475605 | 0.272598 | 0.551407 | 0.731348 | 0.762964 | 0.582197 | 0.489197 | 0.46151  |
| gene-AT3C  | 3.022941 | 1.10609  | 1.908013 | 1.240189 | 1.528032 | 1.649356 | 1.409335 | 1.212723 |
| gene-AT4C  | 10.59069 | 11.03294 | 13.56262 | 6.679993 | 6.610102 | 6.55551  | 4.170115 | 3.839169 |
| gene-AT5C  | 5.463888 | 6.017119 | 4.499675 | 14.50285 | 12.62219 | 14.50622 | 0.211144 | 0.377997 |
| Arabidopsi | 0.688589 | 1.243218 | 1.144264 | 1.142937 | 1.530705 | 1.241278 | 0.60332  | 1.208296 |
| gene-AT2C  | 6.990013 | 8.398752 | 7.902941 | 5.476761 | 5.673961 | 5.457487 | 11.2563  | 10.92839 |
| gene-AT4C  | 0.918326 | 1.988612 | 2.837099 | 2.587885 | 2.598804 | 3.993735 | 1.351204 | 1.737804 |
| gene-AT5C  | 5.077648 | 7.836315 | 6.80356  | 2.443515 | 3.424366 | 2.235696 | 2.198528 | 3.629207 |
| gene-AT4C  | 147.4353 | 145.9382 | 148.7476 | 220.1344 | 218.5632 | 213.4412 | 119.0986 | 123.8776 |
| gene-AT5C  | 7.370966 | 6.893576 | 7.465982 | 4.409935 | 5.910778 | 6.1518   | 15.13876 | 17.89953 |
| gene-AT5C  | 9.389553 | 8.531385 | 7.760294 | 5.583581 | 4.749763 | 6.855117 | 15.14707 | 14.02351 |
| gene-AT5C  | 63.37656 | 61.51489 | 62.34031 | 76.81023 | 79.53876 | 69.96116 | 41.64461 | 37.71518 |
| gene-AT1C  | 24.17668 | 23.14684 | 23.14804 | 19.12167 | 17.175   | 18.96103 | 31.86263 | 35.01616 |
| gene-AT3C  | 0.499679 | 0.573014 | 0.499677 | 0.316644 | 0.475549 | 0.164294 | 0.091409 | 0.202829 |
| gene-AT3C  | 11.7116  | 10.25578 | 8.361939 | 14.48355 | 14.33982 | 16.31479 | 6.303874 | 5.973429 |
| gene-AT1C  | 1.863144 | 2.770077 | 2.479962 | 5.430868 | 3.515017 | 5.589164 | 2.377126 | 0.949005 |
| gene-AT1C  | 5.75812  | 4.83788  | 4.992782 | 10.22967 | 11.16164 | 11.11435 | 6.735374 | 5.528434 |
| gene-AT5C  | 9.253603 | 10.81027 | 10.62228 | 13.51218 | 17.17505 | 16.20823 | 4.183645 | 5.855392 |
| gene-AT1C  | 7.718982 | 8.206581 | 8.13018  | 13.26533 | 15.34699 | 15.89027 | 0.671253 | 0.577552 |
| gene-AT3C  | 0.372987 | 0.164442 | 0.29449  | 0.189602 | 0.268911 | 0.191475 | 0.813916 | 0.963267 |
| gene-AT3C  | 3.114277 | 3.22884  | 3.837292 | 2.492651 | 2.118445 | 2.454724 | 2.495769 | 4.395045 |
| gene-AT5C  | 23.92408 | 24.28461 | 23.99036 | 67.64005 | 68.81159 | 67.88266 | 4.069037 | 4.848781 |
| gene-AT3C  | 4.188527 | 2.814891 | 2.82852  | 1.894843 | 1.854154 | 2.575236 | 3.719821 | 4.64855  |
| gene-AT3C  | 7.620806 | 9.248658 | 7.802882 | 3.032108 | 2.530828 | 2.532878 | 9.085808 | 9.362811 |
| gene-AT1C  | 2.500299 | 3.586463 | 2.952589 | 5.723567 | 6.244728 | 6.582649 | 3.972192 | 3.236093 |
| gene-AT1C  | 4.380764 | 3.996894 | 4.419561 | 1.655685 | 1.941865 | 1.97813  | 1.474061 | 0.778879 |
| gene-AT1C  | 29.79965 | 27.46145 | 27.61493 | 24.82444 | 25.24391 | 22.73989 | 14.10078 | 15.23558 |
| gene-AT1C  | 37.61164 | 39.99518 | 35.84977 | 13.18677 | 13.13906 | 12.74802 | 38.87371 | 37.80961 |
| gene-AT5C  | 6.393534 | 7.098868 | 6.665047 | 8.462114 | 7.692895 | 7.692106 | 2.431053 | 3.253256 |
| gene-AT5C  | 79.0439  | 77.9247  | 77.1554  | 45.51668 | 44.78458 | 44.19158 | 130.2151 | 137.6101 |
| gene-AT1C  | 181.6485 | 175.1236 | 179.3642 | 111.7408 | 113.6126 | 112.6943 | 126.2875 | 128.069  |
| gene-AT2C  | 6.060015 | 5.359104 | 7.220331 | 36.70815 | 36.70707 | 37.61705 | 0.444156 | 0.763378 |
| gene-AT3C  | 0.479139 | 0.536389 | 0.401189 | 0.865657 | 1.313691 | 1.351585 | 0.913378 | 0.835559 |
| gene-AT1C  | 1.68837  | 1.651201 | 1.276683 | 1.289624 | 1.462067 | 0.966474 | 5.745531 | 6.945462 |
| gene-AT1C  | 1.770363 | 2.580141 | 1.952883 | 0.972853 | 1.158144 | 1.124158 | 3.266101 | 3.146414 |
| gene-AT3C  | 18.76882 | 19.88638 | 19.33479 | 35.71849 | 31.37903 | 33.13199 | 20.02775 | 20.81618 |
| gene-AT3C  | 1.04301  | 1.190566 | 1.724178 | 2.151572 | 2.51687  | 2.258609 | 0.724594 | 0.947714 |
| gene-AT1C  | 46.02062 | 42.10037 | 42.98424 | 22.34268 | 20.20902 | 20.53194 | 66.71417 | 65.3971  |
| gene-AT2C  | 6.532498 | 7.142788 | 6.409393 | 3.185462 | 3.137423 | 3.517591 | 6.758577 | 6.468469 |
| gene-AT4C  | 4.116194 | 6.099615 | 5.911977 | 6.230866 | 4.562722 | 6.178349 | 2.42494  | 1.967214 |
| gene-AT5C  | 2.151392 | 1.642967 | 1.738506 | 2.853825 | 3.164169 | 2.165107 | 1.210193 | 1.257449 |
| gene-AT5C  | 9.45799  | 8.781584 | 11.30942 | 6.744337 | 6.607048 | 7.936345 | 10.23462 | 9.207778 |
| gene-AT2C  | 27.83007 | 26.95957 | 27.88844 | 8.793107 | 9.518573 | 9.053524 | 13.11124 | 12.289   |
| gene-AT3C  | 4.471148 | 4.846848 | 5.542125 | 4.507756 | 6.709926 | 4.252117 | 4.521551 | 4.432998 |
| gene-AT5C  | 2.423034 | 2.184567 | 2.153758 | 1.405906 | 2.296332 | 0.905135 | 1.329484 | 1.89355  |
| gene-AT4C  | 7.978832 | 5.177489 | 6.666574 | 9.742865 | 9.532742 | 8.857892 | 5.832603 | 4.85034  |
| gene-AT4C  | 21.6085  | 26.28302 | 25.05402 | 25.92971 | 24.21217 | 27.1639  | 19.86568 | 20.46351 |

|            |          |          |          |          |          |          |          |          |
|------------|----------|----------|----------|----------|----------|----------|----------|----------|
| gene-AT2C  | 3.72171  | 3.456245 | 3.744654 | 3.872881 | 4.351507 | 3.597128 | 4.70143  | 4.778275 |
| gene-AT5C  | 1.215296 | 1.297787 | 0.820935 | 0.492421 | 0.34888  | 0.538301 | 0.978448 | 0.83674  |
| gene-AT1C  | 38.19336 | 36.90765 | 35.75585 | 20.84313 | 21.67769 | 21.66068 | 61.77506 | 59.93002 |
| gene-AT2C  | 20.12693 | 18.0252  | 18.1823  | 7.877394 | 6.672231 | 7.772996 | 41.78879 | 40.93284 |
| gene-AT5C  | 18.15175 | 18.46929 | 19.42647 | 22.06301 | 22.07786 | 23.24716 | 12.88402 | 14.18031 |
| gene-AT5C  | 2.341958 | 1.939655 | 1.696625 | 2.303541 | 2.158241 | 2.697045 | 1.511097 | 0.939102 |
| gene-AT3C  | 5.642588 | 5.847286 | 5.420635 | 6.477164 | 6.731027 | 6.523892 | 9.662223 | 10.87106 |
| Arabidopsi | 1.225513 | 0.92703  | 1.014032 | 0.613466 | 0.423588 | 0.480695 | 0.812024 | 0.96629  |
| gene-AT4C  | 5.988865 | 7.463806 | 6.554464 | 12.77158 | 12.25322 | 12.37814 | 6.529986 | 6.265791 |
| gene-AT1C  | 3.779527 | 4.826    | 4.657552 | 4.443935 | 3.447738 | 4.54443  | 1.718423 | 2.005945 |
| gene-AT1C  | 4.509761 | 3.616496 | 4.531474 | 3.377433 | 4.575198 | 3.699771 | 1.354822 | 1.626706 |
| gene-AT4C  | 3.641888 | 6.308968 | 4.451404 | 3.75513  | 4.868803 | 4.513407 | 7.840101 | 6.071113 |
| gene-AT2C  | 4.667585 | 6.31626  | 5.773775 | 3.735695 | 3.591032 | 3.468444 | 4.806949 | 4.09728  |
| gene-AT3C  | 2.13469  | 2.182853 | 1.996701 | 3.408466 | 3.513073 | 2.682482 | 1.784341 | 1.527097 |
| gene-AT1C  | 1.087546 | 1.290875 | 1.382039 | 2.145166 | 2.087597 | 2.487672 | 1.232783 | 1.017612 |
| gene-AT3C  | 11.32086 | 12.89789 | 10.9402  | 13.78109 | 15.81037 | 13.86602 | 12.30438 | 12.4262  |
| gene-AT1C  | 3.11079  | 2.941681 | 2.805357 | 6.528393 | 6.344953 | 7.003368 | 3.689285 | 4.026546 |
| gene-AT2C  | 0.272041 | 0.522575 | 0.536229 | 4.554904 | 2.98753  | 4.453075 | 0.22458  | 0.160308 |
| gene-AT2C  | 76.95751 | 75.55985 | 77.73424 | 39.35321 | 41.84729 | 39.7465  | 68.33945 | 72.2245  |
| gene-AT1C  | 5.224788 | 5.575742 | 5.221021 | 30.53915 | 28.13688 | 31.08066 | 6.873176 | 8.746796 |
| gene-AT1C  | 36.71838 | 36.15662 | 37.1396  | 111.3913 | 106.9164 | 107.4325 | 58.3139  | 62.58229 |
| gene-AT3C  | 5.960752 | 8.212785 | 6.900308 | 6.41201  | 5.915479 | 5.678356 | 7.835843 | 8.210484 |
| gene-AT5C  | 3.46541  | 3.111321 | 4.218732 | 5.113333 | 4.838929 | 5.280423 | 3.931387 | 3.094182 |
| gene-AT2C  | 10.14485 | 10.88158 | 10.8982  | 25.32336 | 25.30592 | 24.0402  | 2.49531  | 3.129817 |
| gene-AT2C  | 16.45661 | 16.19262 | 15.32315 | 14.80951 | 13.28231 | 16.11166 | 15.37917 | 17.93103 |
| gene-AT3C  | 21.20828 | 19.44593 | 22.01759 | 24.57917 | 25.27862 | 25.72145 | 4.092271 | 5.607571 |
| gene-AT2C  | 0.866428 | 1.19754  | 0.898258 | 1.191292 | 1.325083 | 1.394126 | 0.450083 | 0.484516 |
| gene-AT5C  | 91.79724 | 85.5034  | 88.14723 | 135.5201 | 139.5065 | 128.2345 | 74.94293 | 80.94576 |
| gene-AT5C  | 5.329461 | 4.207658 | 5.226784 | 3.912147 | 3.575435 | 4.321717 | 1.052795 | 1.51449  |
| gene-AT5C  | 0.652939 | 0.688708 | 1.048823 | 0.406154 | 0.789556 | 1.076621 | 4.279778 | 4.142459 |
| gene-AT1C  | 10.63504 | 10.17964 | 10.64804 | 8.380082 | 8.616437 | 8.245387 | 13.11676 | 11.14484 |
| gene-AT5C  | 87.46311 | 84.36774 | 85.58175 | 32.00334 | 33.81746 | 34.25303 | 53.66739 | 53.13714 |
| gene-AT2C  | 0.85245  | 0.726248 | 0.927392 | 1.28255  | 1.456927 | 1.244415 | 4.248207 | 3.207029 |
| gene-AT4C  | 44.46933 | 41.80339 | 42.36519 | 55.01407 | 57.11597 | 55.18833 | 28.39558 | 29.82169 |
| gene-AT1C  | 4.990523 | 3.604203 | 4.056209 | 7.150831 | 5.690084 | 5.865005 | 1.465379 | 1.497645 |
| gene-AT4C  | 3.376148 | 3.024924 | 3.10023  | 1.064256 | 1.362008 | 0.837627 | 6.644425 | 5.40466  |
| gene-AT4C  | 3.44092  | 3.201876 | 3.312818 | 13.78031 | 13.36328 | 14.2135  | 0        | 0.053785 |
| gene-AT4C  | 25.91715 | 24.71106 | 26.06707 | 11.49657 | 10.83581 | 11.69329 | 17.51072 | 19.98634 |
| gene-AT5C  | 22.43219 | 23.57146 | 22.22301 | 32.12278 | 33.01258 | 37.44746 | 5.767371 | 5.017094 |
| gene-AT2C  | 10.65233 | 11.32009 | 10.67511 | 14.83654 | 14.955   | 14.99896 | 9.838359 | 8.889037 |
| gene-AT3C  | 11.28219 | 11.41448 | 11.16074 | 8.436425 | 9.108245 | 7.953907 | 26.2694  | 25.14098 |
| gene-AT3C  | 1.873901 | 1.714123 | 1.167698 | 2.427953 | 2.803393 | 2.62719  | 1.851136 | 1.593087 |
| gene-AT2C  | 19.28113 | 19.87388 | 22.46302 | 26.04839 | 27.53079 | 28.77587 | 14.4993  | 15.50987 |
| gene-AT2C  | 4.155271 | 3.976909 | 3.933702 | 4.551887 | 4.51124  | 5.325572 | 1.615528 | 1.640193 |
| gene-AT1C  | 1.600466 | 0.997345 | 0.943699 | 0.888825 | 1.066996 | 1.228275 | 2.449047 | 2.136126 |
| gene-AT5C  | 1.507109 | 1.798268 | 1.819699 | 0.400946 | 0.255918 | 0.295731 | 1.984354 | 1.412642 |
| gene-AT3C  | 6.336797 | 4.945033 | 6.314869 | 4.179768 | 4.339516 | 4.644455 | 6.595142 | 6.23836  |
| gene-AT3C  | 2.312646 | 2.199007 | 2.767812 | 0.2994   | 0.303934 | 0.384026 | 0.154168 | 0.246848 |
| gene-AT3C  | 3.128198 | 1.907042 | 2.534935 | 1.815647 | 1.800603 | 1.702716 | 4.811996 | 8.203163 |
| gene-AT5C  | 3.00648  | 2.818825 | 2.535672 | 0.784004 | 0.88143  | 0.966612 | 5.01205  | 4.072785 |
| gene-AT5C  | 11.01351 | 10.09955 | 11.46828 | 15.69592 | 14.68991 | 14.93464 | 10.55615 | 10.68421 |



|            |          |          |          |          |          |          |          |          |
|------------|----------|----------|----------|----------|----------|----------|----------|----------|
| gene-AT3C  | 10.927   | 11.54134 | 10.5871  | 14.95881 | 16.34312 | 13.01036 | 3.65319  | 4.86231  |
| gene-AT3C  | 5.366176 | 4.587898 | 4.824815 | 3.877423 | 3.845464 | 4.017369 | 1.8327   | 2.379025 |
| gene-AT4C  | 1.414434 | 1.664747 | 1.573498 | 1.623395 | 2.155799 | 2.00476  | 2.451875 | 2.347215 |
| gene-AT3C  | 3.972405 | 3.739182 | 3.197861 | 6.896632 | 6.499089 | 7.65587  | 2.4987   | 2.310927 |
| gene-AT1C  | 45.78404 | 44.26304 | 46.76675 | 33.83733 | 31.73219 | 33.53037 | 62.62164 | 63.55552 |
| gene-AT5C  | 0.361461 | 0.220423 | 0.533473 | 3.023049 | 5.520127 | 2.716885 | 0.161744 | 0.051735 |
| gene-AT3C  | 3.261868 | 3.498427 | 3.769435 | 3.544243 | 3.852498 | 4.302096 | 4.286622 | 4.441144 |
| gene-AT5C  | 13.14033 | 13.21516 | 14.75839 | 11.4914  | 9.608418 | 8.775856 | 30.68124 | 34.11329 |
| gene-AT1C  | 1.203035 | 2.145567 | 1.934737 | 1.578374 | 1.030925 | 1.936641 | 4.103446 | 3.842837 |
| gene-AT3C  | 7.50607  | 8.645924 | 8.268588 | 6.21019  | 6.892926 | 6.647982 | 3.272797 | 3.783431 |
| gene-AT3C  | 39.96713 | 42.03994 | 40.89593 | 57.56881 | 56.58662 | 58.04302 | 66.41731 | 64.67726 |
| gene-AT1C  | 149.118  | 147.7422 | 147.7366 | 96.24234 | 95.083   | 92.10643 | 248.399  | 229.6505 |
| gene-AT4C  | 4.053851 | 4.57007  | 3.977335 | 9.250462 | 9.513952 | 9.049925 | 1.502606 | 1.438177 |
| gene-AT1C  | 14.74333 | 14.85051 | 15.34823 | 116.7655 | 117.2693 | 112.7156 | 20.44648 | 20.95279 |
| gene-AT3C  | 38.11385 | 37.27218 | 32.06139 | 33.91779 | 36.21801 | 34.07048 | 40.00611 | 42.00484 |
| gene-AT2C  | 9.787674 | 8.157431 | 8.362339 | 11.56218 | 10.24768 | 11.14443 | 2.993241 | 3.060404 |
| gene-AT1C  | 1.098163 | 0.823796 | 0.784267 | 0.829212 | 0.856716 | 0.495102 | 0.315149 | 0.524752 |
| gene-AT1C  | 12.49938 | 13.18443 | 12.81815 | 14.53456 | 14.21548 | 13.88777 | 15.19626 | 17.18154 |
| gene-AT2C  | 957.3616 | 1138.838 | 893.4849 | 1257.106 | 1385.353 | 1461.578 | 455.7853 | 396.221  |
| gene-AT1C  | 25.25324 | 26.16821 | 25.43783 | 11.38663 | 11.65958 | 11.11936 | 36.76306 | 39.86604 |
| gene-AT4C  | 7.442664 | 6.812631 | 7.287188 | 7.538495 | 8.51435  | 8.644022 | 9.57305  | 9.775391 |
| gene-AT2C  | 0.912561 | 1.451186 | 0.936504 | 1.717883 | 2.209113 | 1.22421  | 1.048825 | 0.842607 |
| gene-AT1C  | 1010.824 | 1003.407 | 1016.794 | 606.5894 | 605.1251 | 594.5349 | 1641.53  | 1641.722 |
| gene-AT5C  | 0.300742 | 0.404351 | 0.45637  | 1.184587 | 1.075871 | 0.796655 | 0.721489 | 0.87628  |
| gene-AT5C  | 16.59685 | 17.43272 | 15.9238  | 14.04516 | 13.61329 | 12.27624 | 25.54554 | 27.54925 |
| gene-AT5C  | 10.22778 | 10.09956 | 9.457935 | 15.49011 | 13.90057 | 13.01656 | 3.641844 | 4.78545  |
| gene-AT4C  | 2.354935 | 2.216267 | 2.364674 | 1.777195 | 1.770416 | 1.648057 | 4.543818 | 4.177146 |
| Arabidopsi | 30.54626 | 31.92032 | 30.61646 | 8.459737 | 9.071735 | 8.007323 | 2.039759 | 2.288173 |
| gene-AT1C  | 1.812725 | 1.970147 | 2.171898 | 2.387952 | 2.343486 | 1.644113 | 2.641313 | 2.602776 |
| gene-AT5C  | 21.73906 | 19.56865 | 19.8688  | 20.3254  | 21.53251 | 21.63986 | 31.7247  | 30.7885  |
| gene-AT1C  | 258.6639 | 268.0626 | 281.9332 | 132.995  | 133.7595 | 129.2375 | 494.4907 | 495.0704 |
| gene-AT1C  | 19.6727  | 18.97098 | 20.67062 | 13.14231 | 12.4936  | 12.117   | 19.77038 | 20.25639 |
| gene-AT5C  | 5.565489 | 6.45624  | 6.548004 | 0.929652 | 1.242252 | 1.549698 | 0.174827 | 0.191728 |
| gene-AT5C  | 4.35959  | 4.737252 | 4.981997 | 5.972203 | 6.51781  | 5.616989 | 3.663665 | 4.53278  |
| gene-AT1C  | 0.80788  | 0.548552 | 0.542483 | 0.632737 | 0.799876 | 0.744166 | 0.072717 | 0.099666 |
| gene-AT3C  | 5.219242 | 4.278891 | 3.525193 | 1.751163 | 2.398383 | 2.084328 | 4.909396 | 4.971975 |
| gene-AT5C  | 6.39928  | 8.932767 | 6.57268  | 6.311681 | 3.446751 | 3.887018 | 11.13631 | 9.003877 |
| gene-AT2C  | 2.504562 | 2.453891 | 1.894513 | 2.011079 | 1.672167 | 1.814553 | 2.761902 | 2.560279 |
| gene-AT2C  | 2.58612  | 2.062165 | 2.963172 | 2.84745  | 2.550958 | 2.89582  | 5.589993 | 5.889271 |
| gene-AT5C  | 3.934245 | 3.657652 | 4.577781 | 3.108044 | 1.846664 | 2.887155 | 4.040958 | 5.140526 |
| gene-AT5C  | 26.25392 | 28.19193 | 21.88887 | 16.45899 | 19.6752  | 16.88075 | 15.23037 | 10.49115 |
| gene-AT1C  | 57.807   | 58.87224 | 53.99781 | 36.01064 | 38.81218 | 36.96106 | 16.11942 | 19.44581 |
| gene-AT3C  | 20.53557 | 18.89438 | 18.58719 | 12.81006 | 13.80947 | 15.97907 | 30.93245 | 30.79746 |
| gene-AT5C  | 2.186222 | 3.155526 | 3.484735 | 1.781374 | 1.817831 | 2.782401 | 1.837922 | 1.255892 |
| gene-AT5C  | 1.993773 | 1.344445 | 1.022745 | 2.246432 | 2.316719 | 1.67515  | 0.265487 | 0.094901 |
| gene-AT5C  | 1034.017 | 1023.846 | 1069.06  | 704.6173 | 698.2076 | 680.3298 | 1672.544 | 1689.974 |
| gene-AT5C  | 18.49612 | 17.61331 | 16.83798 | 14.18737 | 15.22301 | 16.0706  | 30.03511 | 28.96275 |
| gene-AT5C  | 14.33654 | 14.56548 | 13.24118 | 9.582854 | 10.25737 | 10.72521 | 16.17181 | 17.88608 |
| gene-AT1C  | 1.041809 | 1.328421 | 0.958407 | 3.197896 | 3.534707 | 3.450892 | 7.183557 | 8.511923 |
| gene-AT3C  | 7.575881 | 7.026899 | 8.614224 | 8.380516 | 7.755202 | 7.525016 | 10.49036 | 13.9414  |
| gene-AT3C  | 0.206306 | 0.186154 | 0.285185 | 0.76529  | 0.459809 | 0.868653 | 0.282489 | 0.094198 |

|           |          |          |          |          |          |          |          |          |
|-----------|----------|----------|----------|----------|----------|----------|----------|----------|
| gene-AT5C | 29.29995 | 29.31549 | 29.33319 | 20.89612 | 22.56603 | 20.7212  | 25.35214 | 25.33887 |
| gene-AT4C | 34.45273 | 34.6353  | 35.73188 | 34.95634 | 35.59202 | 32.08295 | 23.25414 | 22.71944 |
| gene-AT5C | 6.515088 | 5.341906 | 7.052989 | 21.33467 | 23.41613 | 24.01858 | 29.56722 | 34.18018 |
| gene-AT4C | 466.4632 | 484.7524 | 458.9188 | 423.0381 | 441.6439 | 451.0932 | 450.9983 | 425.1391 |
| gene-AT3C | 5.497226 | 7.029223 | 6.927951 | 7.828126 | 7.993119 | 8.540942 | 6.905433 | 8.050249 |
| gene-AT1C | 3.930758 | 4.088018 | 4.880416 | 3.537884 | 4.058651 | 3.974377 | 4.609741 | 4.87135  |
| gene-AT1C | 4.878097 | 4.088605 | 3.748018 | 5.344201 | 7.42946  | 6.488266 | 4.068483 | 4.454149 |
| gene-AT1C | 2.327383 | 2.029646 | 2.120493 | 4.650604 | 6.489565 | 5.861578 | 4.985303 | 4.096321 |
| gene-AT5C | 0.263789 | 0.145391 | 0.174232 | 0.571862 | 0.580549 | 0.650732 | 0.786693 | 0.22544  |
| gene-AT3C | 4.29739  | 5.482544 | 5.769782 | 8.343038 | 8.207814 | 9.16798  | 3.115148 | 3.76344  |
| gene-AT4C | 0.475839 | 0.541096 | 0.755051 | 0.235872 | 0.535692 | 0.277517 | 1.552269 | 1.717774 |
| gene-AT5C | 28.00562 | 26.96197 | 29.65518 | 18.29815 | 16.53391 | 18.64215 | 50.14597 | 49.14478 |
| gene-AT4C | 38.94544 | 41.28262 | 40.31337 | 29.73789 | 29.72241 | 28.2525  | 36.51596 | 40.18126 |
| gene-AT4C | 5.341311 | 4.015095 | 4.430357 | 3.155415 | 3.071062 | 3.589027 | 1.436052 | 1.370041 |
| gene-AT1C | 5.011949 | 4.807283 | 5.389557 | 4.034064 | 3.650634 | 4.181632 | 8.192159 | 8.372715 |
| gene-AT1C | 7.649824 | 7.929929 | 7.795916 | 8.864207 | 8.492339 | 10.32968 | 5.723321 | 4.877362 |
| gene-AT3C | 122.543  | 120.2993 | 125.1685 | 80.03363 | 82.59874 | 79.25108 | 214.3838 | 210.0417 |
| gene-AT3C | 1.361268 | 2.65357  | 3.27674  | 4.708267 | 3.677128 | 3.74774  | 4.682197 | 3.177042 |
| gene-AT2C | 2.399952 | 1.916348 | 2.185915 | 1.068084 | 1.011401 | 1.214924 | 0.39794  | 0.695238 |
| gene-AT1C | 14.77842 | 14.80341 | 13.47179 | 16.36548 | 17.59287 | 15.07603 | 3.166067 | 3.314406 |
| gene-AT1C | 9.572396 | 8.090707 | 8.883193 | 4.974699 | 5.949686 | 5.310166 | 8.486052 | 9.151549 |
| gene-AT3C | 0.700625 | 1.042063 | 1.265278 | 0        | 0        | 1.174111 | 0        | 0        |
| gene-AT3C | 2.266532 | 1.813735 | 2.842641 | 1.917523 | 1.926571 | 1.916986 | 3.823689 | 3.87406  |
| gene-AT5C | 10.2102  | 10.5065  | 8.294958 | 5.678052 | 8.500831 | 8.215587 | 10.27771 | 10.54933 |
| gene-AT5C | 369.1093 | 364.2456 | 358.2827 | 166.1598 | 158.6769 | 153.9407 | 954.6477 | 916.0434 |
| gene-AT3C | 6.869257 | 7.61506  | 7.771229 | 11.50645 | 10.76013 | 12.09179 | 4.451903 | 5.847309 |
| gene-AT5C | 15.80855 | 15.88454 | 17.5665  | 289.2231 | 297.9895 | 295.0704 | 16.55501 | 18.59945 |
| gene-AT3C | 69.07443 | 67.53256 | 67.31463 | 32.13094 | 34.44504 | 30.86058 | 33.49767 | 33.40817 |
| gene-AT4C | 4.438556 | 4.460341 | 3.789578 | 0.39715  | 1.228593 | 1.532964 | 3.408939 | 3.038432 |
| gene-AT4C | 2.592829 | 2.94438  | 3.338639 | 0.434652 | 0.479668 | 0.896922 | 0.857749 | 1.283464 |
| gene-AT3C | 7.753152 | 7.047819 | 6.557861 | 6.959248 | 7.441518 | 7.651027 | 1.890608 | 2.115989 |
| gene-AT3C | 5.900116 | 3.957087 | 8.933687 | 5.675148 | 5.509384 | 7.148529 | 10.07962 | 8.953403 |
| gene-AT1C | 15.72688 | 16.9336  | 15.74672 | 8.271763 | 8.232989 | 6.85781  | 15.29923 | 20.22673 |
| gene-AT5C | 0.95768  | 0.386293 | 0.594649 | 0.288596 | 0.340165 | 1.012826 | 0.438288 | 0.74517  |
| gene-AT4C | 2.589958 | 2.362684 | 2.089952 | 1.590469 | 2.08559  | 1.772085 | 2.204135 | 2.355444 |
| gene-AT5C | 6.255308 | 5.551399 | 5.000389 | 5.064054 | 4.301235 | 5.066933 | 7.04066  | 7.60658  |
| gene-AT1C | 2.709318 | 2.559789 | 2.632848 | 2.053855 | 1.402263 | 1.785805 | 6.365502 | 7.564187 |
| gene-AT2C | 114.2193 | 116.1954 | 117.8276 | 155.7365 | 155.4724 | 161.6528 | 125.9897 | 128.1097 |
| gene-AT3C | 6.314884 | 6.268543 | 7.377847 | 14.5913  | 14.54096 | 14.51998 | 6.744335 | 6.681521 |
| gene-AT1C | 11.69824 | 12.26209 | 11.53859 | 4.713886 | 5.638986 | 5.887625 | 4.14959  | 2.893608 |
| gene-AT3C | 31.37577 | 31.20363 | 30.60756 | 22.73607 | 23.58638 | 21.49434 | 46.90035 | 49.16122 |
| gene-AT2C | 61.19331 | 58.6808  | 53.92065 | 84.72675 | 81.75462 | 85.22042 | 78.17207 | 75.67796 |
| gene-AT1C | 7.693146 | 6.596    | 8.914829 | 5.018476 | 5.961111 | 4.602754 | 11.60901 | 13.9852  |
| gene-AT3C | 23.80168 | 24.78322 | 24.38945 | 25.56628 | 25.45805 | 26.31359 | 38.14025 | 36.67909 |
| gene-AT3C | 37.85592 | 43.99468 | 31.63303 | 23.92306 | 24.1054  | 23.4713  | 38.27282 | 38.03442 |
| gene-AT5C | 6.338036 | 7.933194 | 9.429013 | 10.76937 | 12.35656 | 11.39919 | 5.29911  | 5.361315 |
| gene-AT1C | 0.820912 | 0.757764 | 1.670107 | 2.636388 | 2.417503 | 2.472195 | 0.64576  | 0.611746 |
| gene-AT4C | 3.875592 | 3.57293  | 4.365607 | 3.711363 | 4.525611 | 4.531774 | 1.363029 | 1.302198 |
| gene-AT2C | 21.50603 | 25.12136 | 26.50598 | 47.40156 | 51.32674 | 50.11631 | 17.95024 | 18.02422 |
| gene-AT3C | 2.192984 | 2.266055 | 2.057338 | 2.951294 | 3.900095 | 3.617337 | 7.955538 | 7.005514 |
| gene-AT5C | 34.29435 | 33.79637 | 34.61547 | 65.01432 | 61.94038 | 69.02839 | 29.44524 | 31.21647 |

|           |          |          |          |          |          |          |          |          |
|-----------|----------|----------|----------|----------|----------|----------|----------|----------|
| gene-AT5C | 124.1638 | 119.3738 | 120.0888 | 38.27025 | 40.58967 | 38.57551 | 51.03213 | 51.26472 |
| gene-AT2C | 14.18578 | 15.89195 | 11.9156  | 11.74497 | 11.21469 | 13.16866 | 26.32393 | 24.32281 |
| gene-AT2C | 8.747604 | 6.973572 | 8.531846 | 6.680398 | 6.551246 | 6.754166 | 1.332564 | 2.051022 |
| gene-AT2C | 6.958692 | 6.67153  | 6.67628  | 7.620941 | 8.454707 | 8.759179 | 1.568235 | 1.763921 |
| gene-AT3C | 1.014723 | 1.737315 | 0.485125 | 1.515391 | 1.376686 | 0.591238 | 0.274128 | 0.214161 |
| gene-AT5C | 11.04598 | 12.61078 | 11.27275 | 18.26597 | 16.6017  | 17.32679 | 12.51611 | 13.84159 |
| gene-AT4C | 24.3005  | 22.92089 | 25.38444 | 41.51805 | 40.07308 | 39.60098 | 61.88605 | 65.2997  |
| gene-AT2C | 14.49409 | 14.50899 | 15.98287 | 7.502396 | 7.475599 | 6.795677 | 2.106421 | 2.125422 |
| gene-AT3C | 1.351562 | 0.988613 | 1.349234 | 0.936222 | 1.567674 | 1.022075 | 1.390806 | 1.758789 |
| gene-AT3C | 4.629853 | 5.676538 | 5.600514 | 4.225907 | 5.109403 | 4.891322 | 14.36024 | 17.75728 |
| gene-AT2C | 27.7343  | 25.64857 | 25.83913 | 34.41863 | 31.02815 | 30.4514  | 21.31801 | 22.00621 |
| gene-AT3C | 12.43128 | 12.95024 | 14.02519 | 13.29847 | 13.16935 | 15.26214 | 17.78896 | 20.0415  |
| gene-AT2C | 20.08826 | 20.09259 | 20.91872 | 15.90622 | 18.01304 | 16.2878  | 30.37063 | 29.46002 |
| gene-AT1C | 2.263869 | 1.9704   | 2.075663 | 2.943903 | 2.711552 | 2.582452 | 2.846202 | 2.111438 |
| gene-AT5C | 1.443719 | 1.480019 | 1.436712 | 2.08935  | 2.352561 | 1.647752 | 1.82914  | 1.054015 |
| gene-AT3C | 4.998866 | 4.430012 | 5.214869 | 5.514299 | 5.09092  | 5.409905 | 5.007645 | 7.204426 |
| gene-AT2C | 0.318522 | 0.292658 | 0.464503 | 0.19624  | 0.185869 | 0.238129 | 1.372125 | 1.187451 |
| gene-AT2C | 36.62139 | 39.60044 | 37.3281  | 9.033434 | 8.461953 | 9.356607 | 5.403334 | 5.435413 |
| gene-AT2C | 9.112158 | 11.15089 | 11.72221 | 11.94233 | 12.68229 | 14.36554 | 8.524939 | 9.471386 |
| gene-AT4C | 95.42647 | 96.61544 | 100.4008 | 73.48907 | 71.34515 | 69.07491 | 198.423  | 196.746  |
| gene-AT1C | 11.27579 | 10.10774 | 11.97475 | 12.24573 | 13.16914 | 12.50928 | 9.10133  | 9.582414 |
| gene-AT1C | 0.717067 | 0.521426 | 1.056817 | 0.691331 | 0.712616 | 0.694783 | 0.141189 | 0.099826 |
| gene-AT2C | 3.11849  | 2.695646 | 3.396313 | 4.30541  | 5.75487  | 5.682668 | 2.002978 | 1.877299 |
| gene-AT1C | 1.617257 | 1.195751 | 1.29907  | 0.627814 | 0.638223 | 0.703614 | 2.785739 | 3.160241 |
| gene-AT1C | 3.035065 | 3.083881 | 2.892772 | 1.35386  | 1.505237 | 1.800849 | 2.633972 | 2.498759 |
| gene-AT5C | 121.7144 | 116.6868 | 115.2064 | 75.84552 | 76.20749 | 81.63994 | 203.179  | 213.4361 |
| gene-AT5C | 47.72485 | 49.32325 | 48.45927 | 39.14539 | 44.3156  | 41.52119 | 75.81786 | 73.33992 |
| gene-AT1C | 0        | 0.153467 | 0.173434 | 0.516673 | 0        | 0.399469 | 0.144972 | 0        |
| gene-AT1C | 14.90506 | 14.74062 | 15.3686  | 24.38015 | 26.56299 | 26.53473 | 2.214544 | 1.33924  |
| gene-AT5C | 35.57192 | 33.53905 | 33.0197  | 7.87326  | 8.324926 | 9.52901  | 1.333046 | 1.032322 |
| gene-AT2C | 0.604535 | 0.607878 | 0.708337 | 0.489227 | 0.355071 | 0.287865 | 0.458792 | 0.830668 |
| gene-AT5C | 66.81046 | 63.4774  | 67.27225 | 55.82974 | 59.50101 | 57.05397 | 13.09649 | 13.94871 |
| gene-AT3C | 5.836254 | 5.964326 | 6.254142 | 4.959112 | 4.577243 | 5.640569 | 7.785349 | 7.034141 |
| gene-AT1C | 1.533998 | 1.550548 | 1.891518 | 1.21071  | 1.269719 | 1.201166 | 1.457056 | 1.356843 |
| gene-AT1C | 41.81626 | 47.04262 | 41.49718 | 68.2468  | 72.1648  | 63.89315 | 29.53522 | 25.62763 |
| gene-AT4C | 13.71985 | 14.74936 | 14.12095 | 15.06012 | 14.31197 | 16.96752 | 11.19704 | 12.87787 |
| gene-AT3C | 0.820204 | 0.75115  | 0.722479 | 1.109362 | 1.041487 | 1.2207   | 0.756661 | 0.33341  |
| gene-AT1C | 0.177989 | 0.109214 | 0.180484 | 0.431997 | 0.559029 | 0.650675 | 0.918531 | 0.61466  |
| gene-AT1C | 8.362065 | 7.988794 | 8.126742 | 10.8228  | 11.25523 | 11.12561 | 2.433549 | 2.313562 |
| gene-AT3C | 4.930369 | 7.294246 | 5.635258 | 5.933411 | 6.890274 | 4.977343 | 2.017026 | 2.194329 |
| gene-AT3C | 175.5586 | 179.6441 | 182.7771 | 657.9161 | 637.0386 | 631.7917 | 75.7479  | 82.94862 |
| gene-AT1C | 1.221202 | 1.272948 | 1.422621 | 1.629378 | 2.168957 | 1.359209 | 0.820989 | 0.810018 |
| gene-AT5C | 29.35376 | 27.42394 | 27.89569 | 17.28428 | 17.1743  | 16.14134 | 41.05398 | 40.85945 |
| gene-AT1C | 9.36848  | 10.11341 | 9.456599 | 4.052928 | 5.208936 | 5.427131 | 4.758829 | 4.618016 |
| gene-AT4C | 0.588739 | 0.304191 | 0.49305  | 0.539101 | 0.79324  | 0.42595  | 0.727112 | 1.066893 |
| gene-AT1C | 5.361856 | 4.768816 | 3.959152 | 3.685173 | 3.488675 | 4.112143 | 5.338419 | 7.483658 |
| gene-AT5C | 4.963717 | 5.50174  | 4.523236 | 4.421998 | 3.84871  | 4.11597  | 7.047873 | 6.35011  |
| gene-AT5C | 0.023271 | 0        | 0.024059 | 0        | 0.072765 | 0.090381 | 0        | 0        |
| gene-AT3C | 2.452989 | 2.24625  | 2.145346 | 2.919452 | 2.574018 | 1.92699  | 2.298285 | 2.814273 |
| gene-AT2C | 0.24645  | 0.245333 | 0.073683 | 0.110398 | 0.266477 | 0.322872 | 0.599386 | 0.713487 |
| gene-AT2C | 23.61002 | 22.72236 | 23.36106 | 40.23866 | 40.5559  | 38.86393 | 16.793   | 16.37773 |

|            |          |          |          |          |          |          |          |          |
|------------|----------|----------|----------|----------|----------|----------|----------|----------|
| gene-AT3C  | 2.20918  | 2.844225 | 2.184604 | 0.695407 | 0.95103  | 0.794415 | 1.014884 | 1.148073 |
| gene-AT5C  | 12.44429 | 12.31509 | 11.53607 | 12.94172 | 11.71597 | 11.89648 | 16.8365  | 17.63747 |
| gene-AT5C  | 0.788024 | 0.603675 | 0.826565 | 2.107141 | 1.456998 | 1.403785 | 0.955908 | 0.816067 |
| gene-AT4C  | 3.898931 | 4.690892 | 5.712335 | 3.543282 | 3.715366 | 4.328712 | 1.956528 | 3.474055 |
| gene-AT3C  | 25.82716 | 27.90627 | 27.71346 | 20.00769 | 20.7926  | 22.27416 | 49.77963 | 47.23457 |
| gene-AT3C  | 1.675357 | 1.886824 | 1.233752 | 0.933907 | 0.108384 | 0.709241 | 4.031769 | 5.325978 |
| gene-AT3C  | 30.62476 | 28.84829 | 30.33339 | 53.67968 | 53.25367 | 54.73772 | 13.64646 | 13.34665 |
| gene-AT3C  | 317.0943 | 315.4189 | 317.2733 | 103.2354 | 100.9333 | 99.63817 | 657.5875 | 739.8533 |
| gene-AT4C  | 4.532283 | 3.255773 | 3.129933 | 13.95612 | 14.314   | 15.38221 | 7.174583 | 6.574841 |
| gene-AT3C  | 8.008854 | 7.880703 | 7.601201 | 14.89618 | 15.43746 | 13.29703 | 5.558894 | 6.01143  |
| gene-AT5C  | 12.05798 | 12.77795 | 12.58936 | 7.753089 | 8.666551 | 8.702715 | 16.02605 | 15.25034 |
| gene-AT4C  | 11.29141 | 12.14136 | 8.989231 | 10.78842 | 11.77298 | 10.74371 | 17.81628 | 16.18774 |
| gene-AT3C  | 4.607958 | 6.057778 | 4.611121 | 6.714681 | 5.666264 | 5.291653 | 9.621553 | 12.24223 |
| gene-AT2C  | 222.1549 | 230.3442 | 231.905  | 179.9226 | 177.474  | 179.3532 | 256.1319 | 285.144  |
| gene-AT5C  | 23.43279 | 23.08916 | 23.60794 | 45.62678 | 47.90351 | 46.64786 | 17.39419 | 20.42467 |
| gene-AT2C  | 11.89167 | 11.73676 | 11.53267 | 28.48051 | 29.42965 | 25.81158 | 10.83069 | 9.603637 |
| gene-AT1C  | 10.18618 | 9.396508 | 9.766751 | 11.38098 | 11.98398 | 10.12565 | 8.153537 | 7.058918 |
| gene-AT4C  | 9.008278 | 8.398124 | 8.775701 | 6.303787 | 5.482546 | 5.599695 | 9.660112 | 9.79029  |
| gene-AT1C  | 13.17402 | 12.84905 | 15.36342 | 28.40706 | 30.93668 | 30.61524 | 10.42014 | 10.24672 |
| Arabidopsi | 4.032961 | 1.560407 | 2.440139 | 1.361657 | 1.069443 | 1.599904 | 2.250797 | 2.306158 |
| gene-AT5C  | 1.186187 | 0.944196 | 1.455826 | 1.082817 | 0.626715 | 1.138847 | 1.15701  | 1.234261 |
| gene-AT5C  | 7.425958 | 6.825805 | 7.586757 | 5.010749 | 4.583945 | 4.376276 | 1.356559 | 1.682693 |
| gene-AT5C  | 240.8521 | 230.429  | 231.7721 | 133.9006 | 133.8261 | 127.4626 | 210.6935 | 216.8439 |
| gene-AT2C  | 2.868792 | 2.323627 | 2.682547 | 1.116684 | 2.179308 | 1.473421 | 6.976166 | 6.162961 |
| gene-AT1C  | 1.789175 | 1.288189 | 1.647236 | 0.861297 | 1.139152 | 1.827291 | 1.923936 | 2.38695  |
| gene-AT2C  | 1.327357 | 0.742875 | 0.958385 | 2.293971 | 2.979407 | 2.278353 | 1.801424 | 1.735361 |
| gene-AT2C  | 2.385797 | 2.115202 | 0.969389 | 7.49983  | 6.705459 | 6.174296 | 3.189881 | 3.074651 |
| gene-AT2C  | 1.901332 | 1.821212 | 1.268516 | 4.222989 | 4.372148 | 4.658411 | 0.936135 | 0.780355 |
| gene-AT3C  | 7.412061 | 8.172664 | 8.073482 | 5.079676 | 5.400942 | 4.944708 | 5.578715 | 5.206394 |
| gene-AT5C  | 0.756496 | 0.914161 | 1.342997 | 0        | 0.121522 | 0        | 0        | 0        |
| gene-AT2C  | 20.1961  | 20.29762 | 19.84746 | 14.80952 | 15.77314 | 13.89761 | 19.01758 | 17.96015 |
| gene-AT1C  | 4.128667 | 8.350893 | 5.161907 | 4.740116 | 3.508761 | 3.575935 | 6.740946 | 4.973116 |
| gene-AT4C  | 0.638383 | 0.707884 | 0.763559 | 0.423509 | 0.264546 | 0.267772 | 0.256815 | 0.300932 |
| gene-AT4C  | 2.075226 | 3.530813 | 2.658884 | 3.026307 | 3.684694 | 3.831328 | 4.160223 | 3.637058 |
| gene-AT4C  | 8.121717 | 7.852855 | 8.214005 | 10.27645 | 10.08233 | 11.24292 | 10.65904 | 11.89385 |
| gene-AT4C  | 24.12224 | 28.01501 | 26.56057 | 22.44633 | 19.58054 | 20.32414 | 23.33775 | 28.03535 |
| gene-AT2C  | 55.46454 | 51.78635 | 58.16121 | 38.16847 | 42.18222 | 41.27982 | 82.43883 | 82.46165 |
| gene-AT1C  | 11.30584 | 10.92424 | 10.58272 | 2.272575 | 2.852462 | 3.383195 | 13.44669 | 14.04767 |
| gene-AT4C  | 29.02682 | 27.36148 | 28.28332 | 25.08743 | 25.96479 | 27.70527 | 11.79312 | 13.69744 |
| gene-AT3C  | 2.978748 | 2.628957 | 3.711445 | 1.599457 | 1.343572 | 1.583716 | 0.043123 | 0.036946 |
| gene-AT3C  | 1.906814 | 2.236533 | 2.24895  | 10.0123  | 9.17347  | 9.728012 | 6.119558 | 6.165841 |
| gene-AT5C  | 29.08015 | 30.89854 | 30.57802 | 20.09019 | 19.13193 | 20.79978 | 52.08968 | 55.39868 |
| gene-AT3C  | 11.55337 | 12.42844 | 9.740583 | 37.15257 | 43.80915 | 39.04578 | 36.61779 | 43.21334 |
| gene-AT4C  | 173.1921 | 164.0254 | 161.4098 | 490.6169 | 486.6471 | 499.4884 | 79.98235 | 81.247   |
| gene-AT2C  | 4.055128 | 3.920265 | 3.656721 | 3.946985 | 4.181717 | 4.18241  | 5.807475 | 5.533056 |
| gene-AT5C  | 2037.409 | 2007.389 | 2005.018 | 1062.251 | 1077.311 | 1073.691 | 4083.637 | 4306.942 |
| gene-AT1C  | 0.169995 | 0.145114 | 0.209397 | 0.337439 | 0.326818 | 0.573845 | 0.2205   | 0.14849  |
| gene-AT4C  | 16.14128 | 15.76903 | 16.11491 | 11.93207 | 11.57742 | 12.22145 | 22.74113 | 24.33479 |
| gene-AT1C  | 3.12306  | 2.963424 | 2.971378 | 3.407233 | 2.378514 | 2.946015 | 4.250207 | 4.537865 |
| gene-AT3C  | 103.2766 | 103.266  | 106.1339 | 82.38202 | 77.31294 | 78.1964  | 182.2086 | 181.8033 |
| gene-AT5C  | 147.7194 | 156.7185 | 156.6258 | 130.0348 | 129.0281 | 127.229  | 264.0417 | 270.623  |

|            |          |          |          |          |          |          |          |          |
|------------|----------|----------|----------|----------|----------|----------|----------|----------|
| gene-AT1C  | 0.579443 | 0.549735 | 0.680314 | 0.372133 | 0.324542 | 0.091762 | 1.332797 | 1.306531 |
| gene-AT1C  | 0.882532 | 0.868186 | 1.493998 | 1.207305 | 1.638977 | 1.558363 | 0.224813 | 0.311561 |
| gene-AT3C  | 5.514733 | 4.814347 | 4.489164 | 3.630702 | 4.187634 | 4.465844 | 8.210913 | 6.293596 |
| gene-AT3C  | 1.54854  | 1.702069 | 1.599785 | 2.887578 | 2.952066 | 2.813304 | 1.109735 | 1.40911  |
| gene-AT4C  | 4.699287 | 4.488306 | 5.052108 | 9.342314 | 8.704939 | 8.918745 | 1.890241 | 2.019209 |
| gene-AT3C  | 21.24605 | 20.26767 | 18.76994 | 11.67919 | 12.18448 | 13.22451 | 34.21393 | 34.64534 |
| gene-AT3C  | 263.3403 | 258.5083 | 256.7427 | 278.7977 | 272.3948 | 268.0954 | 335.3193 | 348.325  |
| gene-AT2C  | 20.16054 | 17.15856 | 19.49679 | 14.6465  | 14.61753 | 14.43331 | 32.21951 | 31.5693  |
| gene-AT3C  | 0.739085 | 1.176161 | 0.636284 | 1.236465 | 0.793211 | 0.873404 | 0.055516 | 0.506917 |
| gene-AT1C  | 0.094327 | 0.043648 | 0.217682 | 0        | 0.143588 | 0.073029 | 0.149991 | 0.213284 |
| gene-AT1C  | 6.765248 | 7.135254 | 7.968194 | 6.106139 | 7.009926 | 7.516886 | 3.806527 | 3.221025 |
| gene-AT3C  | 6.713464 | 6.459258 | 6.12303  | 7.70859  | 6.953437 | 6.636187 | 12.43769 | 14.13976 |
| gene-AT3C  | 1.687325 | 1.85716  | 1.438102 | 2.762285 | 2.441537 | 2.798784 | 0.447616 | 0.421829 |
| gene-AT1C  | 1.690829 | 1.08379  | 1.510887 | 1.466727 | 1.807359 | 1.386235 | 1.134151 | 0.988279 |
| gene-AT1C  | 1.409747 | 0.900721 | 1.07456  | 2.58128  | 2.317798 | 2.733297 | 4.558893 | 5.095093 |
| gene-AT5C  | 2.718589 | 2.806049 | 2.886966 | 1.357802 | 2.023868 | 1.683025 | 5.301259 | 5.172925 |
| gene-AT1C  | 17.17501 | 17.17229 | 21.53015 | 21.59149 | 20.36551 | 21.78422 | 45.53107 | 43.57977 |
| gene-AT3C  | 17.82542 | 17.89295 | 16.05797 | 160.8142 | 171.779  | 153.3264 | 3.957589 | 4.216817 |
| gene-AT2C  | 17.76526 | 17.97166 | 17.24296 | 14.52682 | 13.30478 | 14.28602 | 32.64921 | 33.01969 |
| gene-AT1C  | 2.152779 | 3.095413 | 2.713229 | 2.506028 | 2.812394 | 2.233881 | 1.547787 | 0.976205 |
| gene-AT1C  | 331.3785 | 318.7936 | 329.4629 | 304.4683 | 305.6744 | 302.148  | 439.227  | 452.7361 |
| gene-AT1C  | 0.542259 | 0.807834 | 0.538499 | 0.966394 | 0.736063 | 1.135457 | 0.135254 | 0.363979 |
| gene-AT3C  | 8.715835 | 9.301494 | 10.32783 | 10.9046  | 9.547679 | 9.279206 | 7.732911 | 7.589575 |
| gene-AT1C  | 29.90732 | 26.88501 | 29.70454 | 24.0988  | 24.03796 | 24.90811 | 31.23836 | 32.8499  |
| gene-AT1C  | 4.608014 | 4.405091 | 4.664731 | 3.574815 | 2.866202 | 3.024488 | 5.202754 | 4.436215 |
| gene-AT3C  | 78.8306  | 97.83613 | 76.63493 | 33.80343 | 36.47337 | 35.275   | 23.66908 | 23.77487 |
| gene-AT3C  | 176.2602 | 177.198  | 171.4116 | 112.0658 | 119.7583 | 119.2588 | 66.78668 | 49.9767  |
| gene-AT2C  | 19.62926 | 21.31141 | 21.01538 | 27.32001 | 26.31149 | 28.71641 | 9.443949 | 9.039329 |
| gene-AT4C  | 29.27665 | 26.31117 | 27.59243 | 24.80708 | 17.84757 | 18.92543 | 11.21537 | 12.84727 |
| gene-AT3C  | 2.892594 | 3.412378 | 2.694676 | 6.04376  | 5.416766 | 4.341541 | 9.611362 | 9.555182 |
| gene-AT5C  | 8.062922 | 8.802671 | 8.807342 | 4.752457 | 4.296343 | 4.451032 | 5.250544 | 5.097114 |
| gene-AT4C  | 1888.38  | 1874.911 | 1901.765 | 2037.669 | 2076.517 | 2001.893 | 756.7873 | 796.5967 |
| gene-AT3C  | 0.132548 | 0.052583 | 0.170745 | 0.206477 | 0.348948 | 0.17021  | 0.115515 | 0.154368 |
| gene-AT5C  | 5.418504 | 6.125816 | 5.660828 | 2.741113 | 2.45911  | 2.381912 | 8.913299 | 8.639098 |
| gene-AT1C  | 1.335441 | 0.842066 | 0.948205 | 0.304786 | 0.405586 | 0.667297 | 1.221695 | 1.818529 |
| gene-AT2C  | 3.030658 | 2.064646 | 1.700035 | 2.872194 | 3.119849 | 2.681482 | 1.101314 | 0.910421 |
| gene-AT3C  | 6.964641 | 7.206473 | 7.916545 | 8.651021 | 9.577621 | 9.559018 | 3.041703 | 3.353419 |
| gene-AT5C  | 13.78063 | 14.57704 | 11.76628 | 4.404616 | 4.366908 | 5.588214 | 7.742087 | 9.407147 |
| gene-AT5C  | 2.178047 | 2.914052 | 2.316382 | 1.752199 | 1.894982 | 1.944587 | 0.248506 | 0.346417 |
| Arabidopsi | 0.346783 | 0.423755 | 0.524679 | 0.971733 | 0.999254 | 1.063388 | 0.182339 | 0        |
| Arabidopsi | 4.701173 | 4.2732   | 5.600763 | 10.55704 | 8.976579 | 10.11114 | 2.272294 | 2.088264 |
| Arabidopsi | 9.700808 | 11.07338 | 9.014122 | 14.11952 | 12.11832 | 14.6534  | 3.268077 | 2.767593 |
| gene-AT5C  | 11.84785 | 13.17349 | 11.11339 | 6.740754 | 4.359266 | 5.156246 | 16.66742 | 15.9651  |
| gene-AT5C  | 4.683174 | 4.934917 | 5.891184 | 13.17806 | 12.28879 | 12.31598 | 0.878903 | 1.058211 |
| gene-AT1C  | 2.185193 | 2.05047  | 2.48096  | 0.949666 | 1.055075 | 0.612234 | 2.513778 | 2.915462 |
| gene-AT1C  | 1.432103 | 1.225977 | 1.399887 | 3.861964 | 4.006015 | 3.623115 | 2.065278 | 1.409799 |
| gene-AT2C  | 3.175574 | 2.584463 | 2.685137 | 13.42397 | 12.60305 | 11.07519 | 2.64534  | 2.533171 |
| gene-AT2C  | 3.515156 | 3.911819 | 4.569404 | 8.163135 | 7.537569 | 9.039102 | 2.983198 | 3.539796 |
| gene-AT3C  | 0.406502 | 0.084504 | 0.216323 | 1.335533 | 0.860938 | 0.875797 | 0.420123 | 0.605955 |
| gene-AT1C  | 3.652685 | 3.345707 | 3.988504 | 4.376513 | 3.931042 | 4.061916 | 4.98237  | 4.617952 |
| gene-AT5C  | 39.54356 | 38.54977 | 38.62946 | 35.48322 | 33.71221 | 33.02894 | 62.04677 | 55.72312 |

|            |          |          |          |          |          |          |          |          |
|------------|----------|----------|----------|----------|----------|----------|----------|----------|
| gene-AT5C  | 0.644991 | 0.981973 | 0.680009 | 1.575885 | 1.445788 | 0.922534 | 0.851278 | 0.592133 |
| gene-AT4C  | 2.836007 | 3.297352 | 2.777348 | 2.805917 | 3.923013 | 3.424529 | 0.43596  | 0.730855 |
| Arabidopsi | 471.4394 | 504.7089 | 481.4308 | 624.7054 | 659.0394 | 746.1112 | 3914.594 | 1848.185 |
| gene-AT5C  | 0.204069 | 0.493385 | 0.339815 | 0.232443 | 0.144518 | 0.302916 | 0.860899 | 0.924327 |
| gene-AT1C  | 0.81288  | 1.127161 | 1.244444 | 1.05265  | 1.019088 | 1.081722 | 0.442079 | 0.296056 |
| gene-AT1C  | 0.422932 | 1.184456 | 1.18301  | 0.175925 | 0.106444 | 0.111919 | 1.466407 | 1.822621 |
| gene-AT3C  | 17.9338  | 16.1281  | 17.53921 | 46.92953 | 42.27117 | 47.43414 | 25.98151 | 21.75244 |
| gene-AT5C  | 34.63791 | 35.77048 | 34.39383 | 22.49354 | 19.17158 | 19.44645 | 36.99443 | 39.10437 |
| gene-AT1C  | 61.13144 | 62.84815 | 64.69502 | 79.72258 | 86.71839 | 80.13255 | 26.06093 | 30.70796 |
| gene-AT1C  | 145.8515 | 138.0645 | 140.2433 | 53.04552 | 56.37159 | 50.55705 | 130.3015 | 126.1356 |
| gene-AT5C  | 5.959738 | 7.200805 | 6.946945 | 5.189473 | 5.751533 | 5.003592 | 8.827186 | 6.767227 |
| gene-AT1C  | 25.40381 | 24.18295 | 23.58971 | 7.368589 | 7.470853 | 7.6471   | 13.89114 | 14.4106  |
| gene-AT3C  | 0.944575 | 0.415957 | 0.981313 | 37.28672 | 34.65949 | 35.72564 | 0.261089 | 0.788389 |
| gene-AT5C  | 0.635791 | 0.132384 | 0.378669 | 0.40121  | 0.607437 | 0.675225 | 0.180553 | 0.42452  |
| gene-AT1C  | 30.40541 | 29.49667 | 27.6085  | 15.25786 | 16.55428 | 15.55838 | 9.439459 | 8.704823 |
| gene-AT1C  | 1.149815 | 0.947784 | 1.11455  | 2.14588  | 1.963144 | 1.524029 | 0.498871 | 0.381307 |
| gene-AT4C  | 7.677972 | 8.687645 | 8.072575 | 4.399104 | 4.514579 | 3.847108 | 1.707415 | 2.575117 |
| gene-AT1C  | 4.343336 | 4.256922 | 4.543445 | 5.644082 | 4.728163 | 4.121718 | 1.94945  | 2.68334  |
| gene-AT1C  | 21.20332 | 20.18844 | 21.04236 | 13.25262 | 12.06264 | 12.51669 | 39.57584 | 42.67543 |
| gene-AT3C  | 1.273114 | 1.683418 | 1.650557 | 1.832607 | 1.998319 | 1.577603 | 2.193186 | 2.482238 |
| gene-AT3C  | 1.555537 | 1.349349 | 0.830688 | 0.982609 | 1.051784 | 0.903609 | 0.150792 | 0.160653 |
| gene-AT1C  | 0.393963 | 0.248502 | 0.470547 | 0.715067 | 1.23554  | 0.945448 | 0.199929 | 0.270434 |
| gene-AT1C  | 280.2466 | 276.4177 | 282.7539 | 183.1949 | 183.7273 | 180.353  | 403.7638 | 420.3495 |
| gene-AT1C  | 13.54893 | 15.8955  | 17.8519  | 0.372172 | 0.05192  | 0.434855 | 0.634579 | 0.086262 |
| gene-AT1C  | 187.4671 | 180.046  | 189.8647 | 10.84299 | 10.1633  | 11.4744  | 8.084124 | 7.480045 |
| gene-AT4C  | 1.127693 | 0.879606 | 1.167025 | 1.278846 | 1.331525 | 0.944367 | 1.049146 | 1.462927 |
| gene-AT3C  | 12.85333 | 12.04502 | 12.34981 | 12.08598 | 13.17532 | 12.27196 | 27.83616 | 29.60222 |
| gene-AT3C  | 1.228611 | 0.609933 | 1.049777 | 1.478628 | 1.196437 | 1.796958 | 0.786513 | 1.332369 |
| gene-AT3C  | 30.89294 | 26.28084 | 25.69999 | 53.81823 | 54.36032 | 56.84993 | 25.19348 | 22.96554 |
| gene-AT1C  | 2.690432 | 2.642569 | 2.353318 | 1.410639 | 1.979663 | 2.690145 | 1.457848 | 0.752891 |
| gene-AT1C  | 58.70051 | 61.04334 | 62.357   | 56.70738 | 56.05977 | 55.70231 | 27.59797 | 28.99041 |
| gene-AT5C  | 0.76492  | 0.776662 | 0.734777 | 1.012825 | 0.746217 | 0.858323 | 0.52415  | 0.573943 |
| gene-AT5C  | 1.244088 | 1.217777 | 0.929928 | 1.301556 | 1.119892 | 1.527272 | 0.540058 | 0.411268 |
| gene-AT5C  | 0.616429 | 0.989283 | 0.436842 | 1.866585 | 1.473797 | 1.875819 | 0.606444 | 0.174307 |
| gene-AT4C  | 173.4775 | 163.181  | 173.0895 | 76.1013  | 78.97217 | 77.5992  | 83.40786 | 86.55258 |
| gene-AT3C  | 26.47546 | 22.67603 | 27.09114 | 23.65717 | 25.27912 | 21.57853 | 34.40791 | 37.39988 |
| gene-AT3C  | 2.766566 | 1.728978 | 2.055296 | 1.308864 | 2.086641 | 2.115282 | 0.053859 | 0.249856 |
| gene-AT4C  | 13.95885 | 14.14761 | 15.40358 | 6.122254 | 8.272015 | 6.97403  | 33.54567 | 31.48593 |
| gene-AT1C  | 6.963988 | 6.213442 | 6.477013 | 6.627533 | 5.405016 | 6.542708 | 12.80847 | 11.7111  |
| gene-AT5C  | 2.023307 | 2.771507 | 2.675214 | 0.590692 | 0.698294 | 0.45082  | 0.379885 | 0.444446 |
| gene-AT5C  | 18.90934 | 19.34999 | 18.68309 | 26.51112 | 23.80495 | 25.49754 | 5.462867 | 5.235018 |
| gene-AT4C  | 1.333614 | 1.347361 | 1.243144 | 3.160481 | 4.635723 | 4.044376 | 0.882504 | 1.15159  |
| gene-AT3C  | 1.348158 | 1.894631 | 1.32506  | 0.544074 | 1.532505 | 1.012207 | 2.302448 | 2.849474 |
| gene-AT4C  | 47.80415 | 46.47036 | 46.62233 | 131.3801 | 122.9657 | 135.613  | 39.54497 | 34.21172 |
| gene-AT1C  | 41.78114 | 36.98408 | 39.87045 | 56.63349 | 46.53657 | 84.22258 | 12.38147 | 6.557381 |
| gene-AT1C  | 2084.525 | 2019.654 | 2154.777 | 2918.485 | 2768.729 | 2890.708 | 792.8472 | 741.7775 |
| gene-AT1C  | 45.59508 | 44.18733 | 46.58195 | 26.45978 | 27.34343 | 26.39025 | 68.13779 | 64.1936  |
| gene-AT3C  | 7.167029 | 7.811055 | 7.343094 | 6.084267 | 5.813829 | 6.608032 | 12.07422 | 12.8871  |
| gene-AT3C  | 0.622016 | 0.49173  | 0.593815 | 0.813521 | 0.729178 | 0.98589  | 0.468541 | 0.354818 |
| gene-AT5C  | 1.647828 | 2.26798  | 2.338761 | 1.36616  | 2.272028 | 2.194338 | 6.973111 | 6.012407 |
| gene-AT2C  | 270.2296 | 280.6597 | 274.7946 | 140.3308 | 143.909  | 143.4623 | 507.3727 | 495.719  |

|           |          |          |          |          |          |          |          |          |
|-----------|----------|----------|----------|----------|----------|----------|----------|----------|
| gene-AT2C | 20.61444 | 20.36509 | 19.43604 | 19.20134 | 18.97149 | 19.07015 | 8.921631 | 8.847236 |
| gene-AT3C | 48.11901 | 51.34033 | 46.2074  | 41.82502 | 43.03274 | 43.08126 | 53.22234 | 51.172   |
| gene-AT5C | 4.475483 | 4.424124 | 5.096461 | 6.18174  | 5.432051 | 5.251416 | 6.526811 | 7.006714 |
| gene-AT5C | 7.448048 | 8.197491 | 7.661842 | 9.967164 | 11.543   | 10.52064 | 6.809388 | 7.525213 |
| gene-AT3C | 2.892596 | 2.773865 | 2.620409 | 4.303627 | 5.05808  | 5.344261 | 2.713202 | 2.265143 |

| WT-CK3   | WT-N1    | WT-N2    | WT-N3    |
|----------|----------|----------|----------|
| 1.580094 | 21.01318 | 22.22391 | 24.15933 |
| 7.138451 | 17.45799 | 15.38321 | 18.59725 |
| 1.188106 | 0.533359 | 0.195008 | 0.341187 |
| 9.188429 | 16.49452 | 14.81253 | 16.14708 |
| 3.713694 | 5.965235 | 6.05216  | 6.845202 |
| 6.866393 | 0.912138 | 0.875769 | 1.168998 |
| 9.79356  | 3.776949 | 4.198458 | 4.401814 |
| 3.028075 | 7.035002 | 6.506035 | 9.328715 |
| 10.95208 | 18.08807 | 16.9938  | 22.0541  |
| 23.78978 | 8.743455 | 7.250249 | 6.263759 |
| 85.18897 | 46.53995 | 46.35345 | 48.74257 |
| 3.848434 | 12.34894 | 14.48775 | 13.48283 |
| 2.144415 | 5.653308 | 7.562604 | 6.928164 |
| 1204.384 | 418.0146 | 408.4854 | 413.9353 |
| 6.965593 | 4.302822 | 4.109985 | 4.019821 |
| 10.71598 | 16.65628 | 12.9744  | 16.02059 |
| 21.40403 | 10.68629 | 9.800953 | 10.88627 |
| 101.1265 | 148.3527 | 145.1767 | 143.0506 |
| 44.02588 | 16.50281 | 14.58011 | 14.34727 |
| 14.23218 | 28.17127 | 26.86106 | 26.67361 |
| 22.77775 | 3.586889 | 3.272597 | 3.28369  |
| 29.27067 | 55.63165 | 56.49978 | 58.01837 |
| 2.114301 | 14.812   | 14.89365 | 14.40036 |
| 34.78509 | 23.31321 | 21.43975 | 21.90876 |
| 2.31957  | 2.578663 | 2.385226 | 3.024984 |
| 0.210069 | 0.492183 | 0.750239 | 0.720151 |
| 0.114892 | 1.611565 | 1.067477 | 1.553882 |
| 1.187689 | 1.908821 | 1.324457 | 2.479395 |
| 0.260805 | 0.691082 | 0.603176 | 1.046335 |
| 20.85308 | 71.12813 | 69.60673 | 75.40103 |
| 27.78413 | 11.34713 | 11.88989 | 13.42794 |
| 2.179886 | 2.906686 | 2.854114 | 2.941813 |
| 14.81458 | 36.41751 | 39.3566  | 40.27819 |
| 0.198568 | 0.591324 | 0.744207 | 0.461338 |
| 12.44571 | 5.110334 | 4.87351  | 5.715943 |
| 28.0926  | 21.67825 | 21.29495 | 19.61794 |
| 6.111291 | 6.87537  | 5.893235 | 6.389649 |
| 0.541783 | 1.683693 | 1.133364 | 1.340043 |
| 28.34844 | 13.13993 | 11.47733 | 13.01684 |
| 0.780343 | 1.999434 | 2.25986  | 1.91263  |
| 4.29431  | 1.72425  | 1.687945 | 1.561686 |
| 6.716621 | 1.304832 | 1.706767 | 1.664884 |
| 6.362165 | 10.84412 | 9.453987 | 10.44938 |
| 0.565791 | 1.771741 | 1.452371 | 1.581643 |
| 0.598026 | 1.502003 | 2.171861 | 1.939186 |
| 1.134159 | 1.153253 | 0.565115 | 0.585667 |
| 25.54123 | 6.743416 | 5.445301 | 6.503312 |
| 0.58449  | 0.215303 | 0.254136 | 0.300556 |
| 10.19044 | 4.583169 | 2.752827 | 4.183728 |



|          |          |          |          |
|----------|----------|----------|----------|
| 10.76723 | 4.180399 | 3.826423 | 6.098978 |
| 12.88666 | 18.9142  | 17.23435 | 19.27437 |
| 1.041485 | 2.518357 | 2.42463  | 2.620994 |
| 28.51034 | 10.25304 | 11.89696 | 13.07055 |
| 9.662941 | 5.240563 | 6.627151 | 5.478192 |
| 0.087301 | 1.280229 | 0.904833 | 0.974884 |
| 2.886456 | 6.377372 | 7.422095 | 7.412966 |
| 44.1858  | 149.0386 | 148.5661 | 153.5457 |
| 6.640358 | 21.16651 | 20.74544 | 19.97272 |
| 0.651965 | 1.940118 | 2.05092  | 2.545501 |
| 0.091765 | 0.98028  | 0.738162 | 1.182544 |
| 1.149763 | 7.74752  | 7.499932 | 6.428035 |
| 1.59889  | 0.587025 | 0.575172 | 0.516415 |
| 64.05344 | 28.83215 | 26.83363 | 29.16873 |
| 0.604162 | 2.105874 | 2.585839 | 1.734833 |
| 5.222494 | 2.789096 | 3.254754 | 3.046992 |
| 29.53052 | 11.41337 | 12.05351 | 12.53361 |
| 5.391245 | 15.82339 | 15.44978 | 15.53502 |
| 1.193159 | 3.491227 | 3.145437 | 3.514067 |
| 0.276241 | 2.091066 | 2.300471 | 1.899427 |
| 355.0994 | 160.7204 | 156.2244 | 167.3331 |
| 67.1116  | 76.26461 | 76.42188 | 76.44555 |
| 21.60412 | 11.94242 | 9.766793 | 12.34411 |
| 1.250458 | 1.463907 | 1.34261  | 1.795056 |
| 19.1256  | 7.711922 | 6.466831 | 7.436601 |
| 3.810968 | 9.762881 | 9.941942 | 9.836206 |
| 27.02096 | 12.86261 | 11.44278 | 12.88368 |
| 0.909342 | 1.581043 | 1.828435 | 1.9915   |
| 1.264419 | 1.706297 | 2.68187  | 2.252401 |
| 0.291004 | 0.803834 | 0.665401 | 1.331713 |
| 6.22276  | 15.13723 | 14.21003 | 14.84046 |
| 34.02467 | 17.31075 | 14.96225 | 18.67957 |
| 20.99957 | 125.9452 | 114.7849 | 123.3187 |
| 40.02082 | 15.97005 | 18.09953 | 17.6912  |
| 2.97658  | 54.58852 | 53.48797 | 58.52647 |
| 0.081513 | 2.169523 | 1.750949 | 1.573107 |
| 142.1167 | 54.7523  | 54.2494  | 59.46762 |
| 12.42269 | 31.33219 | 29.31446 | 30.79909 |
| 17.55458 | 8.913157 | 9.031217 | 9.076827 |
| 25.97859 | 12.88577 | 12.84853 | 12.48473 |
| 11.47412 | 34.32957 | 32.07306 | 34.20316 |
| 11.45938 | 6.083652 | 6.154509 | 5.175417 |
| 15.48702 | 17.12174 | 17.584   | 18.40386 |
| 2.402328 | 4.208667 | 3.329178 | 3.964559 |
| 6.979887 | 15.00793 | 16.57897 | 17.15652 |
| 3.604844 | 1.330581 | 1.20117  | 1.307789 |
| 2.421815 | 0.932769 | 1.798661 | 1.490337 |
| 16.70664 | 55.40331 | 64.87148 | 54.68792 |
| 11.61096 | 3.179486 | 1.882297 | 4.417089 |
| 23.76283 | 113.8499 | 115.898  | 119.1032 |
| 12.48277 | 4.88454  | 4.421558 | 4.772571 |

|          |          |          |          |
|----------|----------|----------|----------|
| 9.221359 | 6.164013 | 5.43928  | 5.595232 |
| 2.967092 | 1.040483 | 1.160184 | 1.412293 |
| 3.070726 | 7.67072  | 9.819048 | 9.113151 |
| 4.275129 | 36.58344 | 34.99669 | 36.22874 |
| 0.09744  | 0.423061 | 0.197151 | 0.281537 |
| 1.246368 | 1.552694 | 1.984386 | 2.211369 |
| 4.007183 | 1.047078 | 0.768947 | 0.87398  |
| 3.84481  | 1.836107 | 2.010435 | 1.894515 |
| 14.29853 | 10.10846 | 9.984091 | 10.43733 |
| 3.968357 | 0        | 0.138582 | 0.312177 |
| 0.242514 | 1.132534 | 1.142516 | 0.984769 |
| 5.807021 | 5.889421 | 6.32138  | 5.687865 |
| 2.954341 | 2.33099  | 2.961561 | 3.70395  |
| 0.567643 | 5.01276  | 4.606711 | 3.164791 |
| 17.04869 | 50.84078 | 47.36429 | 49.79179 |
| 7.571206 | 2.612258 | 3.471024 | 3.789132 |
| 23.81787 | 11.24334 | 11.44017 | 12.31191 |
| 0.272696 | 0.752988 | 0.713667 | 0.509227 |
| 41.60887 | 23.61882 | 22.85725 | 24.83053 |
| 12.78804 | 117.2429 | 106.6743 | 118.2405 |
| 8.945771 | 23.52956 | 27.59156 | 26.72683 |
| 1.866861 | 1.469058 | 1.140745 | 1.053811 |
| 24.18395 | 6.271314 | 5.673617 | 5.284925 |
| 4.622398 | 0.833078 | 0.794481 | 0.767275 |
| 2.425638 | 7.072355 | 8.774651 | 10.54298 |
| 1.451984 | 1.918374 | 2.517988 | 2.101495 |
| 11.82798 | 5.067609 | 3.705382 | 3.990388 |
| 0.314747 | 4.318242 | 3.943736 | 4.480031 |
| 25.46702 | 63.40265 | 61.88862 | 66.01335 |
| 3.673479 | 3.354682 | 3.539353 | 3.098741 |
| 2.821923 | 0.808899 | 1.083766 | 1.278933 |
| 4.901212 | 0.575292 | 0.512641 | 0.447638 |
| 11.27661 | 25.16008 | 22.6201  | 23.98008 |
| 3.016831 | 21.51271 | 21.4476  | 21.787   |
| 15.05849 | 8.783318 | 7.253763 | 6.782374 |
| 5.656764 | 7.402404 | 6.487913 | 6.896183 |
| 0.341367 | 0.894834 | 0.976992 | 0.733312 |
| 4.940057 | 1.249086 | 1.609623 | 2.06694  |
| 0.288161 | 0.811117 | 0.842685 | 0.814234 |
| 0        | 0.807166 | 0.801672 | 0.56528  |
| 22.69004 | 7.374915 | 6.74721  | 7.346374 |
| 42.82236 | 3.457349 | 1.980394 | 3.777721 |
| 1573.087 | 369.058  | 381.32   | 374.8518 |
| 1.675192 | 2.674592 | 2.601689 | 1.839986 |
| 0        | 0.506085 | 0.502148 | 0.919792 |
| 2.104379 | 0.832792 | 0.964003 | 0.590456 |
| 2.146519 | 7.078493 | 6.897007 | 7.158031 |
| 20.61047 | 9.777964 | 9.814594 | 9.806727 |
| 4.983434 | 2.333691 | 2.78306  | 1.69027  |
| 1.993266 | 3.282558 | 3.457828 | 2.481825 |
| 52.6471  | 22.84841 | 24.03694 | 21.9381  |

|          |          |          |          |
|----------|----------|----------|----------|
| 0.344934 | 1.754947 | 2.549826 | 3.037038 |
| 11.10159 | 4.378285 | 3.861314 | 4.984124 |
| 3.305435 | 1.253461 | 1.498271 | 1.024828 |
| 0.572054 | 3.168455 | 3.382996 | 1.741595 |
| 31.29733 | 0        | 0        | 0        |
| 173.1965 | 48.51799 | 50.61079 | 50.9982  |
| 5.249002 | 13.12421 | 13.94671 | 13.71567 |
| 37.16579 | 83.88563 | 83.67828 | 85.85596 |
| 41.13449 | 13.54043 | 15.2564  | 14.83615 |
| 1.196048 | 0.30617  | 0.602984 | 0.548042 |
| 0.719036 | 2.575686 | 2.275702 | 2.979581 |
| 3.388133 | 3.062679 | 3.172665 | 2.69052  |
| 0.056769 | 6.54253  | 5.153548 | 5.760167 |
| 2.208014 | 6.347654 | 5.418775 | 5.813152 |
| 8.75068  | 90.14698 | 82.9525  | 88.87946 |
| 221.4769 | 117.5089 | 111.563  | 118.8192 |
| 9.686534 | 2.059743 | 2.574657 | 2.649677 |
| 2.522583 | 6.737116 | 5.576266 | 7.327974 |
| 12.15619 | 8.777036 | 6.347375 | 6.580629 |
| 27.79371 | 71.61307 | 67.85889 | 75.75047 |
| 3.581539 | 7.71134  | 9.075535 | 7.781151 |
| 2.142024 | 0        | 0        | 0.077159 |
| 26.74441 | 12.71161 | 8.161426 | 12.64197 |
| 4.821339 | 25.10735 | 22.66738 | 26.57765 |
| 0.048253 | 1.686982 | 1.66909  | 1.11157  |
| 10.50107 | 26.40141 | 26.56731 | 27.71234 |
| 1.372538 | 4.530298 | 3.161305 | 4.308506 |
| 28.915   | 12.39792 | 12.45875 | 13.97524 |
| 0.010522 | 0.346281 | 0.27909  | 0.249668 |
| 2.729122 | 8.010023 | 6.506471 | 7.475705 |
| 5.089363 | 7.281124 | 7.519882 | 8.069311 |
| 1.240617 | 2.55177  | 2.189486 | 1.882714 |
| 10.90867 | 3.1494   | 5.445467 | 5.257699 |
| 0.4178   | 4.676764 | 4.333599 | 5.356828 |
| 6.847205 | 31.22492 | 28.69227 | 28.78377 |
| 10.52939 | 4.583001 | 4.451659 | 5.444921 |
| 2.084201 | 3.911128 | 3.760115 | 3.393002 |
| 39.38233 | 13.59361 | 14.98508 | 11.48828 |
| 14.21796 | 5.841184 | 5.152223 | 6.379891 |
| 4.820343 | 0.481235 | 0.481459 | 0.649065 |
| 1.167606 | 0.78448  | 0.407995 | 0.726042 |
| 11.63226 | 4.79147  | 4.219519 | 5.773403 |
| 120.0809 | 86.58146 | 88.86054 | 88.26088 |
| 1.633082 | 1.005762 | 0.975093 | 0.941978 |
| 1.347056 | 6.110743 | 5.333961 | 4.794954 |
| 0.577272 | 1.402305 | 1.393741 | 2.115503 |
| 0.12609  | 0.699167 | 0.818761 | 0.652163 |
| 1.845309 | 4.671575 | 2.604558 | 3.872084 |
| 1.720656 | 1.948936 | 1.76439  | 1.931395 |
| 16.39937 | 9.204365 | 9.887789 | 8.916149 |
| 4.345785 | 10.4768  | 10.17163 | 12.42741 |

|          |          |          |          |
|----------|----------|----------|----------|
| 86.43811 | 46.00851 | 45.98033 | 48.12122 |
| 1.392991 | 3.89025  | 3.903044 | 3.710304 |
| 8.896835 | 21.92998 | 24.7585  | 21.02405 |
| 1.114903 | 6.037152 | 7.864502 | 6.451856 |
| 3.535724 | 1.153204 | 1.555583 | 1.278581 |
| 9.350565 | 4.056006 | 4.004995 | 4.771603 |
| 4.041667 | 2.195469 | 1.672841 | 1.894042 |
| 0.633417 | 1.918096 | 2.006472 | 1.683769 |
| 40.65064 | 5.621246 | 5.720293 | 6.270016 |
| 1.118417 | 3.352417 | 2.776677 | 2.717042 |
| 1.02265  | 3.13609  | 2.858649 | 2.881477 |
| 5.153481 | 14.60433 | 14.32008 | 14.73924 |
| 0.207747 | 1.431008 | 1.174265 | 1.846152 |
| 0        | 1.28261  | 1.568912 | 1.262979 |
| 0.245713 | 3.993795 | 4.191137 | 3.959686 |
| 4.87332  | 4.999982 | 3.249759 | 3.763027 |
| 1.206864 | 2.65334  | 3.318442 | 2.537844 |
| 45.30948 | 20.98757 | 20.19666 | 19.93503 |
| 0.896681 | 1.275501 | 0.957093 | 0.971719 |
| 1.149961 | 4.515513 | 4.60376  | 4.076403 |
| 2.904835 | 0.616929 | 0.984628 | 1.787613 |
| 36.32531 | 22.74193 | 23.69265 | 24.66781 |
| 0.232631 | 0.507728 | 0.655829 | 0.532304 |
| 0.094755 | 0.499054 | 0.414907 | 0.521145 |
| 6.624695 | 2.755123 | 2.954689 | 3.409674 |
| 4.749276 | 8.243067 | 8.549498 | 10.6705  |
| 2.284021 | 6.506429 | 5.846977 | 6.662316 |
| 0.18169  | 0.26693  | 0.053412 | 0.343202 |
| 5.29711  | 2.735335 | 2.85852  | 2.64856  |
| 5.10885  | 4.464015 | 3.802195 | 3.26439  |
| 74.41367 | 32.24825 | 31.14553 | 32.79433 |
| 254.4178 | 106.6641 | 102.9559 | 112.4885 |
| 0.451468 | 1.248347 | 1.459962 | 0.815167 |
| 67.04855 | 3.055655 | 3.07498  | 2.832334 |
| 8.589823 | 4.65617  | 3.898461 | 4.112883 |
| 5.315238 | 12.0877  | 12.18439 | 14.02273 |
| 52.77268 | 25.63987 | 24.28212 | 28.43256 |
| 61.34797 | 20.88537 | 22.63398 | 20.7856  |
| 0.998175 | 0.655219 | 0.490598 | 0.210465 |
| 512.4297 | 109.3128 | 113.029  | 112.0613 |
| 12.2367  | 32.54369 | 27.47194 | 30.59548 |
| 24.96444 | 42.95861 | 38.87899 | 46.19296 |
| 1.130802 | 0.313795 | 0.35504  | 0.701535 |
| 124.5897 | 55.4176  | 59.24521 | 60.21116 |
| 13.19734 | 43.67558 | 42.19763 | 45.19762 |
| 2.198046 | 0.961503 | 1.202527 | 1.10096  |
| 74.63313 | 18.42243 | 18.21129 | 17.69441 |
| 2.167437 | 4.682421 | 5.215818 | 4.755806 |
| 0        | 6.981932 | 5.906566 | 6.43787  |
| 4.989776 | 1.909562 | 1.799798 | 1.398448 |
| 17.95627 | 7.559157 | 7.750183 | 9.16837  |

|          |          |          |          |
|----------|----------|----------|----------|
| 0.535073 | 4.125998 | 3.634881 | 2.637213 |
| 0.301183 | 1.491897 | 1.329832 | 1.034192 |
| 2.012933 | 5.529639 | 6.621721 | 5.805214 |
| 60.55701 | 33.88672 | 29.51556 | 34.1507  |
| 13.048   | 37.7815  | 38.39822 | 47.02096 |
| 68.50866 | 32.27842 | 32.26101 | 35.61961 |
| 5.741446 | 16.85614 | 17.14401 | 17.33258 |
| 248.0189 | 19.9578  | 15.85515 | 18.20974 |
| 1.062002 | 3.81337  | 2.963421 | 3.088639 |
| 16.67761 | 63.53644 | 60.43118 | 63.15414 |
| 11.35772 | 2.380514 | 1.531232 | 2.549772 |
| 5.958241 | 2.980621 | 2.763823 | 3.230141 |
| 251.489  | 113.6369 | 113.0802 | 121.2003 |
| 146.6692 | 10.12708 | 10.51597 | 10.48864 |
| 5.243984 | 2.651558 | 2.612048 | 2.354761 |
| 32.18946 | 26.49332 | 26.76463 | 21.88217 |
| 0.541094 | 0.082072 | 0.124619 | 0.073012 |
| 55.05301 | 18.61204 | 18.26623 | 19.53525 |
| 5.65162  | 5.215239 | 5.170722 | 4.361308 |
| 58.84648 | 19.47731 | 15.10763 | 15.42795 |
| 0.305303 | 1.725907 | 2.275799 | 2.652739 |
| 10.6681  | 3.564075 | 5.053602 | 4.348782 |
| 12.6243  | 5.812807 | 8.979147 | 6.806155 |
| 13.93869 | 4.959443 | 5.436895 | 5.048671 |
| 167.9998 | 51.30622 | 49.75073 | 53.45601 |
| 0.23772  | 1.122962 | 1.987896 | 0.854736 |
| 1.979536 | 0.888916 | 0.883386 | 0.933725 |
| 2.241459 | 8.821896 | 8.368515 | 8.17844  |
| 1.670864 | 2.101001 | 1.977029 | 2.827246 |
| 1.188104 | 1.982556 | 1.986118 | 1.190459 |
| 2.933854 | 1.511327 | 1.18328  | 1.439858 |
| 8.756952 | 25.49748 | 21.70047 | 23.88538 |
| 6.510759 | 22.68829 | 23.13457 | 24.40952 |
| 3.367141 | 2.129697 | 2.332727 | 1.582333 |
| 10.99568 | 26.37979 | 25.21165 | 27.94774 |
| 15.85556 | 7.716428 | 6.296746 | 5.958678 |
| 1.759986 | 2.425642 | 2.082996 | 2.222705 |
| 16.41274 | 8.199852 | 9.447588 | 8.921775 |
| 0.350103 | 1.118341 | 0.935857 | 0.937691 |
| 1.220542 | 1.266012 | 0.736435 | 0.770511 |
| 238.5057 | 71.63363 | 71.16251 | 73.3159  |
| 0.30503  | 0.694967 | 1.111559 | 0.843135 |
| 8.656039 | 7.504327 | 5.710956 | 7.304633 |
| 15.96456 | 4.640457 | 5.075553 | 4.519534 |
| 33.56986 | 11.69953 | 10.41983 | 13.00724 |
| 200.7815 | 75.65195 | 75.07976 | 78.87508 |
| 4.532731 | 14.3627  | 16.4413  | 16.09843 |
| 0.687982 | 4.839293 | 4.776556 | 5.795307 |
| 1.447515 | 1.967575 | 2.196539 | 2.166394 |
| 3.765293 | 1.803073 | 2.150859 | 1.382245 |
| 13.81507 | 4.301538 | 4.98157  | 4.569405 |

|          |          |          |          |
|----------|----------|----------|----------|
| 6.130992 | 8.722777 | 8.371716 | 9.387063 |
| 28.50555 | 14.50536 | 13.1704  | 14.18149 |
| 1.440188 | 1.552413 | 1.145212 | 1.791756 |
| 4.717755 | 11.25396 | 13.21207 | 14.17536 |
| 3.186441 | 7.991548 | 8.05368  | 8.192467 |
| 0.532204 | 2.681621 | 3.317249 | 4.015183 |
| 479.1055 | 193.0203 | 201.3974 | 209.6415 |
| 5.369145 | 15.59267 | 14.37923 | 17.71211 |
| 15.57562 | 72.59328 | 76.25763 | 72.33654 |
| 0.060907 | 2.621838 | 2.49368  | 2.358998 |
| 0.831202 | 2.452542 | 2.709632 | 3.655646 |
| 5.885705 | 20.79877 | 20.519   | 22.15193 |
| 3.118233 | 9.459585 | 7.996352 | 7.740656 |
| 106.7748 | 29.54779 | 30.48478 | 31.19904 |
| 3.759263 | 8.128043 | 6.720434 | 7.534355 |
| 16.18607 | 0.460516 | 0.276696 | 0.30078  |
| 15.52221 | 35.28954 | 33.12141 | 34.48162 |
| 0.24995  | 4.932568 | 7.442893 | 6.834869 |
| 84.18847 | 29.69592 | 30.41027 | 31.69114 |
| 85.64777 | 34.30019 | 35.22435 | 33.90041 |
| 8.545641 | 4.10904  | 4.3599   | 4.379506 |
| 0.355478 | 2.851292 | 2.530766 | 2.719407 |
| 14.35092 | 48.3912  | 45.78089 | 48.25559 |
| 145.4149 | 367.3908 | 373.325  | 376.3438 |
| 7.178557 | 3.620381 | 3.301244 | 3.193497 |
| 0.265943 | 17.63336 | 16.48907 | 18.01872 |
| 5.056655 | 2.882344 | 1.738665 | 1.361307 |
| 1.247584 | 2.336244 | 2.810126 | 2.481017 |
| 382.2629 | 110.8073 | 101.8936 | 112.799  |
| 2.666465 | 1.425683 | 1.093487 | 1.212302 |
| 32.30822 | 14.70454 | 16.00802 | 15.30453 |
| 0.492981 | 1.011599 | 1.168709 | 0.89093  |
| 3.990217 | 4.378767 | 4.386785 | 5.122278 |
| 135.6396 | 52.8713  | 58.15287 | 55.76864 |
| 6.991452 | 3.03128  | 3.354977 | 3.298856 |
| 4.520684 | 14.10343 | 17.00561 | 17.26124 |
| 17.98651 | 3.042617 | 2.452426 | 2.288515 |
| 54.81506 | 27.62882 | 27.3439  | 27.72068 |
| 16.01835 | 7.842248 | 8.338629 | 8.075739 |
| 10.29043 | 26.43356 | 30.13625 | 29.37017 |
| 1.072441 | 0.308625 | 1.401244 | 1.036906 |
| 1.817147 | 0.650363 | 0.63698  | 0.769536 |
| 3.15688  | 6.813566 | 6.421132 | 6.048584 |
| 0.157935 | 0.577422 | 1.777776 | 0.455326 |
| 136.6195 | 26.64654 | 27.22483 | 26.48988 |
| 0.102697 | 0.737384 | 0.540681 | 0.536216 |
| 90.30205 | 750.8151 | 744.996  | 755.9677 |
| 8.87147  | 2.596357 | 2.693663 | 2.711562 |
| 0        | 6.649576 | 6.828903 | 6.717684 |
| 0.170894 | 1.536634 | 2.544459 | 1.917202 |
| 10.00716 | 28.50109 | 26.66817 | 31.46993 |

|          |          |          |          |
|----------|----------|----------|----------|
| 0.3415   | 5.753341 | 4.984692 | 5.879144 |
| 50.42646 | 0.99552  | 0.782741 | 0.758564 |
| 0.912965 | 0        | 0        | 0        |
| 0.853053 | 0.087926 | 0        | 0.15129  |
| 26.53731 | 9.594739 | 9.588515 | 10.4081  |
| 0.246261 | 0.034455 | 0.097114 | 0.063481 |
| 2.033733 | 4.372097 | 5.309405 | 4.637659 |
| 11.27397 | 2.955807 | 2.075268 | 2.546469 |
| 16.31045 | 6.367414 | 5.5714   | 7.219671 |
| 4.587037 | 17.04041 | 18.6537  | 19.32352 |
| 0.408769 | 1.42938  | 1.32217  | 1.749918 |
| 48.53611 | 23.44488 | 22.47352 | 21.23498 |
| 54.35811 | 10.13    | 10.47522 | 9.572066 |
| 15.8854  | 37.33756 | 39.66394 | 39.07269 |
| 4.206642 | 2.143996 | 2.027141 | 2.034616 |
| 0.496132 | 1.776326 | 2.672452 | 2.05902  |
| 30.68636 | 13.6709  | 12.27259 | 13.95674 |
| 1.543072 | 0.61161  | 0.588767 | 0.822069 |
| 29.29703 | 6.790389 | 6.660825 | 7.111744 |
| 0.955941 | 3.381274 | 4.084806 | 4.453528 |
| 12.83449 | 3.676866 | 4.219088 | 5.115535 |
| 4.547422 | 9.385428 | 8.804506 | 10.27466 |
| 55.52357 | 98.43879 | 95.78482 | 107.974  |
| 0.321615 | 5.665912 | 5.705305 | 5.529855 |
| 144.399  | 34.12022 | 30.05532 | 33.9207  |
| 1.5704   | 0.40798  | 0.133626 | 0.12566  |
| 85.67446 | 365.1076 | 294.7776 | 347.4117 |
| 46.31246 | 103.3305 | 100.2242 | 108.6144 |
| 9.47647  | 25.61223 | 26.53599 | 27.07325 |
| 0.779286 | 1.098025 | 1.907432 | 1.276435 |
| 4.377801 | 4.58812  | 4.422835 | 5.131716 |
| 0.472448 | 1.392647 | 1.257031 | 1.798133 |
| 8.928776 | 5.511795 | 6.732809 | 6.520379 |
| 1.882101 | 4.996551 | 3.344596 | 2.805243 |
| 4.951506 | 9.846325 | 8.408827 | 9.446654 |
| 2.502924 | 19.62501 | 18.72574 | 18.70132 |
| 94.63533 | 33.06468 | 30.99603 | 32.55421 |
| 6.57388  | 18.18895 | 18.48776 | 18.07289 |
| 0.810623 | 0.285028 | 0.652817 | 0.575318 |
| 0.763609 | 4.32549  | 3.890039 | 4.619976 |
| 63.2968  | 123.4269 | 130.5235 | 131.0047 |
| 1.284241 | 4.437664 | 3.694691 | 4.453636 |
| 1.464842 | 0.931337 | 1.042654 | 1.476266 |
| 0.351237 | 2.427913 | 2.618293 | 3.646074 |
| 0.507958 | 0.227784 | 0.333465 | 0.528502 |
| 20.84885 | 109.9062 | 106.2129 | 114.969  |
| 14.33041 | 68.24007 | 68.6882  | 69.62018 |
| 1.775307 | 3.894364 | 5.077695 | 5.459699 |
| 73.49588 | 49.70191 | 54.18633 | 50.20131 |
| 0.784104 | 1.382112 | 1.165861 | 1.642802 |
| 2.777025 | 3.179035 | 3.000692 | 3.224684 |

|          |          |          |          |
|----------|----------|----------|----------|
| 112.0013 | 15.34198 | 16.89069 | 16.1489  |
| 0.842808 | 3.755735 | 4.325458 | 4.173595 |
| 53.299   | 51.93338 | 48.36728 | 52.95643 |
| 0.297262 | 2.346711 | 2.023059 | 1.897571 |
| 239.5841 | 113.9354 | 1128.988 | 16.34059 |
| 2.316468 | 0.849855 | 0.864683 | 1.00275  |
| 15.63855 | 55.98999 | 56.8611  | 58.7194  |
| 3.923966 | 17.54005 | 18.27739 | 20.00387 |
| 0.231586 | 0.678386 | 1.389966 | 0.818249 |
| 57.08983 | 22.17737 | 21.80749 | 23.23264 |
| 0.713439 | 0.258131 | 0.554852 | 0.876749 |
| 34.09007 | 13.19755 | 13.51147 | 14.26522 |
| 5.535371 | 1.274989 | 0.994233 | 0.928777 |
| 0.482399 | 4.41512  | 4.916445 | 3.761672 |
| 30.72594 | 13.49192 | 13.45295 | 14.61686 |
| 2.463116 | 5.718378 | 5.221088 | 5.372788 |
| 0.089055 | 1.139533 | 1.316389 | 1.295611 |
| 0.413829 | 0.799177 | 0.635342 | 0.415571 |
| 1.756555 | 0.66995  | 0.301599 | 0.550094 |
| 109.7956 | 426.7952 | 418.2242 | 434.3916 |
| 3.659127 | 7.617711 | 7.144359 | 6.943997 |
| 26.52432 | 14.11639 | 13.55768 | 13.91013 |
| 0.504457 | 0.40065  | 0.602158 | 0.469706 |
| 43.1458  | 19.86672 | 21.86079 | 20.93039 |
| 0.028578 | 0.448176 | 0.457226 | 0.649701 |
| 1.066869 | 1.408552 | 1.81331  | 2.411227 |
| 15.05998 | 4.931042 | 4.902911 | 5.85167  |
| 31.38832 | 12.44976 | 12.17404 | 11.29764 |
| 0.48291  | 2.25708  | 1.914377 | 2.035779 |
| 6.726517 | 11.8881  | 11.21401 | 12.05371 |
| 1.501756 | 4.751679 | 6.96061  | 4.139233 |
| 17.65286 | 6.579654 | 5.508954 | 5.45464  |
| 7.443119 | 17.5336  | 19.22535 | 16.84824 |
| 31.65409 | 13.509   | 14.31143 | 14.49827 |
| 3.449227 | 1.688709 | 1.296022 | 1.594089 |
| 32.01053 | 3.566895 | 2.595461 | 3.184832 |
| 51.43723 | 21.87353 | 19.83179 | 25.2115  |
| 19.70477 | 4.993022 | 5.689523 | 5.535155 |
| 8.80531  | 88.15525 | 79.48365 | 86.87454 |
| 9.765158 | 1.794415 | 2.499506 | 1.997502 |
| 1.03989  | 0.573132 | 0.469865 | 0.739264 |
| 2.335432 | 0.91492  | 0.536229 | 0.599822 |
| 6.949992 | 3.457205 | 3.303609 | 3.78911  |
| 3.079855 | 12.57974 | 13.93621 | 12.67134 |
| 30.89121 | 16.07571 | 15.47873 | 13.79405 |
| 2.913003 | 6.318584 | 6.089821 | 6.497606 |
| 14.64769 | 36.17893 | 31.93684 | 33.69384 |
| 146.2442 | 44.0292  | 46.74933 | 44.454   |
| 2.113483 | 4.401447 | 6.837144 | 5.763094 |
| 28.13852 | 11.17253 | 9.22972  | 12.05182 |
| 61.32173 | 144.6676 | 141.0043 | 145.0784 |



|          |          |          |          |
|----------|----------|----------|----------|
| 1.497751 | 14.86591 | 16.46847 | 18.25376 |
| 11.06599 | 9.267904 | 10.92204 | 9.762119 |
| 1.064391 | 0.475975 | 0.33123  | 0.40284  |
| 1.57361  | 7.75841  | 7.23408  | 7.896688 |
| 12.75221 | 33.03368 | 36.52126 | 36.3643  |
| 5.326041 | 1.587806 | 1.542111 | 1.130716 |
| 11.34292 | 4.39221  | 3.713494 | 3.756807 |
| 7.466419 | 17.67713 | 17.38774 | 18.88766 |
| 18.75103 | 50.1484  | 50.78324 | 51.16929 |
| 18.11814 | 53.11287 | 47.14106 | 54.37254 |
| 63.29637 | 31.89119 | 32.85396 | 34.64539 |
| 2.474918 | 0.685771 | 0.745545 | 1.201417 |
| 19.72173 | 10.37154 | 9.782816 | 10.72928 |
| 13.81513 | 32.31122 | 30.64228 | 34.73168 |
| 13.37473 | 13.72035 | 16.61192 | 14.66601 |
| 2.583345 | 9.403868 | 9.005728 | 10.00298 |
| 0.469314 | 1.333063 | 1.415029 | 1.077831 |
| 15.21125 | 35.53629 | 38.4505  | 38.72704 |
| 1.757802 | 0.157025 | 0.146767 | 0.23153  |
| 1.560301 | 3.274992 | 3.032843 | 4.014044 |
| 8.426717 | 16.87405 | 16.10802 | 17.51261 |
| 11.63758 | 4.588514 | 3.153054 | 3.795545 |
| 42.40207 | 56.22451 | 56.32067 | 64.31896 |
| 7.415133 | 2.274988 | 2.285639 | 2.480406 |
| 0.677211 | 3.066072 | 2.419419 | 2.839472 |
| 1.456329 | 4.610455 | 5.061828 | 6.38072  |
| 8.265395 | 12.88425 | 11.07699 | 11.04448 |
| 2.553279 | 125.0458 | 120.6188 | 128.1947 |
| 37.34675 | 145.4421 | 141.2139 | 143.6884 |
| 5.229597 | 2.057244 | 2.237959 | 2.559994 |
| 24.59005 | 4.432757 | 3.468728 | 4.47947  |
| 29.10164 | 63.59841 | 68.33515 | 72.91656 |
| 8.877846 | 10.17411 | 10.29477 | 9.313529 |
| 0.488325 | 0.77046  | 0.737259 | 0.718863 |
| 2.128646 | 3.082302 | 2.303121 | 2.798955 |
| 4.819284 | 19.2368  | 19.84501 | 18.84924 |
| 0.279855 | 0.728577 | 0.518135 | 0.913976 |
| 10.21683 | 9.248268 | 8.570847 | 10.33536 |
| 0.445378 | 0.924776 | 0.959749 | 0.713862 |
| 30.87658 | 9.885262 | 10.73561 | 11.26862 |
| 1.392131 | 0.450393 | 0.959253 | 0.115389 |
| 2.702202 | 1.379623 | 1.083509 | 1.248855 |
| 20.4306  | 4.387246 | 5.706882 | 6.402215 |
| 3.053725 | 8.631825 | 8.691521 | 8.508975 |
| 0        | 3.623061 | 3.708567 | 3.297654 |
| 12.38336 | 23.53508 | 24.05274 | 23.79682 |
| 32.56934 | 18.531   | 18.24683 | 18.33952 |
| 0.461132 | 1.007431 | 0.752661 | 1.322091 |
| 3.621364 | 6.638549 | 5.337111 | 5.974247 |
| 0.786066 | 3.008549 | 2.297517 | 3.342103 |
| 2.919473 | 4.962456 | 4.25876  | 4.924898 |

|          |          |          |          |
|----------|----------|----------|----------|
| 19.87381 | 47.58715 | 47.11831 | 49.05135 |
| 6.84986  | 5.903206 | 5.564155 | 5.354397 |
| 15.50947 | 34.65878 | 38.28426 | 39.12427 |
| 4.803571 | 2.537432 | 2.874371 | 2.731711 |
| 1.999468 | 0.230307 | 0.62136  | 0.535038 |
| 8.24303  | 31.60357 | 34.80573 | 35.92828 |
| 1.797367 | 4.726829 | 4.589243 | 4.933285 |
| 1.761941 | 3.379112 | 3.605956 | 3.806694 |
| 1.977754 | 1.291925 | 1.350169 | 1.75237  |
| 36.41337 | 12.98014 | 13.40712 | 13.42883 |
| 6.852715 | 11.75379 | 10.81393 | 10.78688 |
| 1.433081 | 1.492247 | 1.259768 | 1.238281 |
| 4.445235 | 25.77852 | 26.79986 | 26.03977 |
| 38.8697  | 19.72722 | 20.40163 | 20.94622 |
| 2.123496 | 0.043278 | 0.247371 | 0        |
| 3.625553 | 1.647269 | 0.860942 | 1.168236 |
| 10.07159 | 25.61795 | 27.89117 | 25.71645 |
| 1.866586 | 0.642416 | 0.617676 | 1.236111 |
| 2.612773 | 9.329312 | 8.2066   | 9.405402 |
| 14.47931 | 15.59325 | 14.50197 | 15.37757 |
| 2.700189 | 1.045521 | 1.340952 | 1.45148  |
| 223.6527 | 64.67088 | 64.28805 | 65.55246 |
| 0.760439 | 0.436995 | 0.810707 | 0.602172 |
| 0.629312 | 0        | 0.117484 | 0.305891 |
| 548.799  | 739.4016 | 690.438  | 740.2934 |
| 1.312635 | 0.626124 | 0.427269 | 0.545142 |
| 7.929611 | 14.32343 | 13.94043 | 13.58674 |
| 0.77266  | 2.873164 | 2.412405 | 2.451752 |
| 12.10397 | 37.3923  | 34.10364 | 39.03374 |
| 41.60497 | 18.8915  | 19.59977 | 19.50805 |
| 6.070101 | 14.70974 | 16.89926 | 15.24835 |
| 19.88899 | 48.06197 | 47.8912  | 49.42893 |
| 0.448587 | 2.098038 | 1.868451 | 2.145342 |
| 0.91988  | 0.625547 | 0.766497 | 1.313972 |
| 4.756174 | 3.147922 | 4.203616 | 4.0739   |
| 1.627077 | 0.605248 | 0.217234 | 0.303357 |
| 56.30868 | 17.3325  | 36.60685 | 13.92005 |
| 8.322111 | 3.019696 | 3.427513 | 2.192437 |
| 7.580041 | 3.670163 | 3.485371 | 3.804259 |
| 2.735963 | 1.364503 | 1.206541 | 1.910819 |
| 2.773312 | 4.265856 | 4.248845 | 3.346515 |
| 6.516936 | 19.85357 | 16.78149 | 18.48781 |
| 27.15967 | 33.36526 | 31.45427 | 32.37818 |
| 13.97472 | 90.00991 | 84.85254 | 88.91046 |
| 30.85489 | 14.41246 | 12.71877 | 13.70561 |
| 1.527286 | 4.705035 | 4.562586 | 4.862632 |
| 12.59413 | 5.484721 | 5.057618 | 5.137708 |
| 3.269711 | 1.932645 | 1.888016 | 1.614236 |
| 4.065906 | 1.088912 | 1.588717 | 1.625361 |
| 11.13396 | 5.034633 | 5.380031 | 4.785226 |
| 2.3053   | 1.357377 | 0.796309 | 1.453321 |

|          |          |          |          |
|----------|----------|----------|----------|
| 293.8908 | 84.58807 | 92.83421 | 87.65614 |
| 82.42885 | 251.8218 | 255.11   | 268.681  |
| 9.299936 | 28.42595 | 30.82781 | 30.09671 |
| 2.617937 | 6.158596 | 5.424043 | 5.121031 |
| 16.87766 | 24.38669 | 21.1297  | 24.3366  |
| 410.7177 | 40.88726 | 42.54459 | 40.98052 |
| 12.03835 | 3.987681 | 4.037105 | 4.305764 |
| 0.726009 | 12.24694 | 9.4935   | 16.52736 |
| 74.41931 | 33.68475 | 34.78095 | 38.25012 |
| 208.3769 | 426.3395 | 412.7054 | 432.8838 |
| 0.578618 | 0.334327 | 0.240589 | 0.30944  |
| 14.80467 | 36.77728 | 38.08261 | 37.52542 |
| 854.6064 | 222.2173 | 240.2252 | 241.6777 |
| 2.633198 | 6.781574 | 6.5006   | 6.67305  |
| 12.22415 | 25.97852 | 25.90002 | 25.87414 |
| 1.305593 | 4.005894 | 3.828678 | 3.982508 |
| 2.627773 | 1.000686 | 0.27697  | 1.085543 |
| 2.884624 | 14.51299 | 14.09969 | 14.148   |
| 13.23367 | 19.31815 | 17.91422 | 19.97641 |
| 3.342506 | 3.015231 | 2.494279 | 2.538048 |
| 1705.583 | 537.5203 | 534.4902 | 564.2422 |
| 30.64958 | 7.355093 | 8.587679 | 7.626832 |
| 10.43217 | 4.89326  | 5.027156 | 6.589753 |
| 3.115722 | 0.9088   | 1.687281 | 1.618419 |
| 2.349992 | 5.473187 | 4.905654 | 4.97407  |
| 10.99353 | 2.977445 | 2.875511 | 2.768819 |
| 21.15866 | 9.331197 | 8.865732 | 8.836544 |
| 4.501912 | 1.618409 | 1.328197 | 1.73448  |
| 2.099286 | 6.203988 | 6.684779 | 6.647067 |
| 0.036851 | 0.613799 | 0.760738 | 0.46922  |
| 11.33334 | 47.70502 | 44.40672 | 50.75773 |
| 8.164232 | 3.356778 | 3.312364 | 2.940621 |
| 16.30681 | 4.718781 | 5.683703 | 6.335489 |
| 1.25553  | 11.06613 | 9.902748 | 8.93169  |
| 10.11859 | 4.104891 | 4.27334  | 5.532432 |
| 2.876073 | 4.726902 | 4.383557 | 4.772243 |
| 1.317349 | 4.992683 | 4.832959 | 5.069803 |
| 0.541977 | 0.688655 | 0.869119 | 1.265641 |
| 0.369496 | 0.143402 | 0.545215 | 0.417955 |
| 2.242887 | 4.236178 | 4.118475 | 4.918891 |
| 6.509194 | 3.069607 | 2.818239 | 3.267949 |
| 7.561782 | 2.930369 | 2.164148 | 2.701883 |
| 21.20904 | 53.02502 | 48.75244 | 52.5     |
| 2.374442 | 0.745051 | 0.792239 | 0.780623 |
| 2.495433 | 5.818012 | 5.570611 | 6.19322  |
| 7.873381 | 10.25521 | 10.41914 | 12.30267 |
| 2.39287  | 0.664306 | 0.484666 | 1.427799 |
| 1.934502 | 0.463409 | 0.338715 | 0.41661  |
| 50.41566 | 16.11298 | 16.90773 | 15.53529 |
| 2.867415 | 1.700538 | 1.170405 | 1.594397 |
| 2.236795 | 9.254241 | 9.570964 | 9.953083 |

|          |          |          |          |
|----------|----------|----------|----------|
| 15.22983 | 48.27817 | 44.54012 | 48.37573 |
| 2.824451 | 8.725801 | 7.836433 | 7.448027 |
| 3.444998 | 16.54128 | 15.89563 | 14.62525 |
| 57.3706  | 28.30234 | 29.05439 | 30.43562 |
| 4.63074  | 16.08283 | 14.2068  | 16.8059  |
| 1.173404 | 4.377769 | 4.702985 | 3.671202 |
| 24.57911 | 10.29689 | 10.36014 | 11.73723 |
| 52.08131 | 21.00214 | 21.46614 | 21.38215 |
| 23.43691 | 8.157531 | 9.454854 | 8.882483 |
| 51.24942 | 21.77919 | 20.07929 | 21.86271 |
| 26.32002 | 12.46641 | 10.40952 | 12.46986 |
| 42.08199 | 13.73151 | 12.79439 | 16.9013  |
| 4.949636 | 4.81158  | 5.233894 | 4.561686 |
| 2.024146 | 3.230527 | 3.869577 | 4.690918 |
| 12.96707 | 7.349532 | 7.018842 | 6.700246 |
| 4.507543 | 6.811601 | 6.222045 | 7.406743 |
| 57.41518 | 89.11478 | 89.4315  | 90.09904 |
| 0.467799 | 0.817613 | 0.92273  | 0.977359 |
| 1.8696   | 8.631473 | 9.279243 | 8.007162 |
| 7.474116 | 3.593773 | 3.30599  | 3.681553 |
| 22.53852 | 72.0276  | 60.31205 | 72.32248 |
| 0.050895 | 0.292446 | 0.236981 | 0.25004  |
| 6.057447 | 2.321596 | 1.810967 | 2.599752 |
| 1.101929 | 1.728389 | 1.787228 | 1.557337 |
| 1.040139 | 0.195849 | 0.123795 | 0.463541 |
| 1.359471 | 3.924049 | 3.408632 | 3.747249 |
| 3.795181 | 3.810092 | 3.76366  | 3.572532 |
| 2.616689 | 0.200022 | 0.202242 | 0.225306 |
| 1.736705 | 8.729722 | 6.590449 | 6.30052  |
| 4.798087 | 1.882868 | 2.527513 | 2.274364 |
| 9.084661 | 3.541164 | 4.156365 | 3.664614 |
| 3.535661 | 1.063171 | 0.948318 | 1.284686 |
| 29.04335 | 14.66011 | 14.34969 | 15.35885 |
| 3.420348 | 0.747221 | 1.083886 | 1.110087 |
| 5.089877 | 0.257305 | 0.377491 | 0.157569 |
| 52.92605 | 16.60207 | 16.28226 | 15.36567 |
| 56.34449 | 21.02474 | 17.46222 | 18.44147 |
| 7.763091 | 6.985707 | 6.227705 | 7.389137 |
| 0.438822 | 1.494791 | 1.621316 | 1.973015 |
| 29.10457 | 57.85837 | 55.71531 | 54.29986 |
| 4.778186 | 3.925756 | 3.021586 | 3.657345 |
| 1.125023 | 6.671811 | 6.118955 | 6.307038 |
| 0.167855 | 0.170558 | 0.36298  | 0.169877 |
| 0.262883 | 0.677126 | 0.58342  | 0.63221  |
| 23.05496 | 8.677645 | 7.612231 | 6.179685 |
| 1.209981 | 0.195917 | 0.152636 | 0.149973 |
| 430.6028 | 237.6908 | 236.5806 | 235.3713 |
| 0.29824  | 0.147128 | 0.04449  | 0.177898 |
| 11.4473  | 16.18811 | 14.73025 | 18.13145 |
| 0.14213  | 0.449425 | 0.709771 | 0.923434 |
| 7.417104 | 2.712854 | 2.023764 | 2.920487 |

|          |          |          |          |
|----------|----------|----------|----------|
| 31.26562 | 8.747049 | 8.876614 | 8.031325 |
| 29.45101 | 15.69988 | 14.8921  | 16.19633 |
| 0.952728 | 2.174963 | 2.502698 | 3.253911 |
| 2.267743 | 1.143972 | 1.106436 | 1.294084 |
| 16.10358 | 5.23504  | 5.067142 | 4.653909 |
| 3.742484 | 29.10708 | 32.80021 | 33.45361 |
| 44.57195 | 19.93466 | 21.94417 | 22.0891  |
| 122.9523 | 37.90505 | 34.37457 | 38.38891 |
| 1.456285 | 4.328796 | 4.388117 | 4.408727 |
| 0.660324 | 1.782979 | 2.312491 | 1.562144 |
| 40.13982 | 12.93425 | 12.4761  | 11.89586 |
| 1.802939 | 1.497293 | 3.444756 | 1.067851 |
| 1.210761 | 2.593488 | 2.653592 | 2.157166 |
| 0.984557 | 1.018661 | 1.17023  | 0.778241 |
| 5.181685 | 2.376922 | 2.445211 | 2.625022 |
| 3.95989  | 4.340366 | 4.127658 | 4.112983 |
| 8.014643 | 9.263546 | 6.625352 | 9.67384  |
| 1.511019 | 1.023309 | 0.823985 | 1.215172 |
| 3.808059 | 10.63457 | 10.47723 | 9.973802 |
| 0.745077 | 3.75699  | 3.994862 | 3.502921 |
| 0.327673 | 0.54293  | 0.634354 | 0.478858 |
| 5.149669 | 1.958565 | 2.783429 | 2.437515 |
| 1.428453 | 3.299053 | 4.105644 | 3.885433 |
| 6.580393 | 14.54698 | 15.57841 | 13.0903  |
| 0.184209 | 0.590772 | 0.805842 | 0.632035 |
| 0.454218 | 1.984682 | 2.021146 | 2.674794 |
| 4.793686 | 16.52692 | 15.8121  | 18.79668 |
| 3.651431 | 0.279705 | 0        | 0.129052 |
| 4.37663  | 2.324737 | 2.488336 | 2.862535 |
| 0.171697 | 1.233108 | 1.739556 | 1.618094 |
| 0.959326 | 1.946684 | 2.411492 | 2.436392 |
| 0.731877 | 2.101949 | 1.685484 | 1.711936 |
| 36.78014 | 16.37515 | 18.2995  | 19.02259 |
| 69.24897 | 19.74408 | 20.03953 | 19.01731 |
| 7.87321  | 6.283389 | 3.905923 | 5.353976 |
| 25.78927 | 10.35177 | 10.68748 | 10.91986 |
| 32.20939 | 13.2016  | 12.40494 | 13.2052  |
| 20.11297 | 8.325321 | 7.974913 | 9.250431 |
| 0        | 2.326438 | 1.856846 | 2.489369 |
| 0.858047 | 1.320055 | 0.958891 | 0.913389 |
| 9.819755 | 32.88435 | 31.4546  | 33.49976 |
| 18.46676 | 35.69669 | 37.17304 | 35.43726 |
| 1.755358 | 1.156165 | 1.077526 | 1.046645 |
| 68.53027 | 35.7869  | 37.50359 | 40.09186 |
| 0.292984 | 1.015124 | 1.257661 | 1.401182 |
| 19.82408 | 9.175792 | 7.993037 | 7.343938 |
| 21.54905 | 8.456167 | 7.040491 | 7.392    |
| 29.64112 | 11.91104 | 10.8973  | 11.6116  |
| 0.583735 | 1.153325 | 1.061226 | 1.337796 |
| 1.367491 | 3.160384 | 3.248658 | 2.699921 |
| 11.57132 | 3.668906 | 4.611703 | 4.52251  |

|          |          |          |          |
|----------|----------|----------|----------|
| 6.247102 | 1.088642 | 1.685343 | 1.922211 |
| 1.114323 | 2.526203 | 3.111123 | 2.980577 |
| 1.283955 | 0.718826 | 0.337358 | 0.341648 |
| 12.71808 | 34.26502 | 36.28306 | 36.03685 |
| 30.45991 | 14.30622 | 13.30963 | 13.81042 |
| 3.049355 | 2.779922 | 2.608988 | 2.864191 |
| 114.6248 | 46.5388  | 45.62983 | 52.21359 |
| 0.449327 | 0.513247 | 2.230713 | 0.147647 |
| 0.309583 | 0.822787 | 0.842523 | 1.194289 |
| 0.773978 | 1.565661 | 1.41373  | 1.660627 |
| 0.187832 | 0.975481 | 1.297079 | 1.307722 |
| 0.912984 | 0.867942 | 0.876684 | 0.735862 |
| 0.601006 | 2.288998 | 2.595023 | 3.504677 |
| 2.610277 | 12.15865 | 13.05167 | 10.02466 |
| 20.53539 | 64.36156 | 61.63942 | 67.62902 |
| 3.697406 | 1.047876 | 1.360257 | 1.262121 |
| 5.305797 | 13.34545 | 13.68438 | 12.49164 |
| 8.593758 | 15.32614 | 16.18589 | 16.21216 |
| 2.51808  | 2.043165 | 2.273071 | 1.28037  |
| 9.162673 | 3.080983 | 4.138617 | 3.996978 |
| 3.743119 | 25.79785 | 26.72021 | 26.19369 |
| 4.919032 | 2.189639 | 2.616097 | 2.703958 |
| 5.463292 | 0.399805 | 0.451004 | 0.830172 |
| 0.145146 | 0.359914 | 0.260815 | 0.209522 |
| 100.0721 | 168.9388 | 161.3545 | 170.8912 |
| 55.61273 | 15.05704 | 13.47398 | 15.92837 |
| 1.305689 | 0.993707 | 1.105618 | 1.008838 |
| 0.228262 | 1.015861 | 1.164397 | 1.212128 |
| 11.61976 | 84.72418 | 81.02425 | 92.00305 |
| 9.782728 | 3.389307 | 4.160969 | 5.141798 |
| 10.79103 | 5.382998 | 4.851773 | 4.596949 |
| 22.81703 | 11.05397 | 11.62262 | 12.74436 |
| 8.232704 | 19.50715 | 17.16271 | 17.15629 |
| 1.24227  | 0.64236  | 1.087066 | 1.060015 |
| 0.140609 | 0.510031 | 0.707867 | 0.98457  |
| 4.613025 | 88.38535 | 84.14985 | 91.93943 |
| 0.369457 | 13.28502 | 14.20834 | 13.26989 |
| 13.7466  | 9.252584 | 5.661588 | 7.476465 |
| 6.276013 | 3.028967 | 2.674997 | 3.045886 |
| 2.005309 | 0.772819 | 0.728183 | 0.566779 |
| 3.396773 | 24.70612 | 23.46561 | 20.76193 |
| 199.4654 | 82.81392 | 85.21544 | 88.99649 |
| 635.3718 | 126.6783 | 120.7346 | 126.7053 |
| 9.124792 | 1.142685 | 0.323734 | 1.124113 |
| 0.938779 | 10.79964 | 9.584047 | 11.25779 |
| 0        | 1.619128 | 1.569936 | 2.129288 |
| 0.552174 | 0.439314 | 0.277377 | 0.173043 |
| 3.295369 | 12.12636 | 13.56067 | 14.49071 |
| 0.632217 | 3.757296 | 2.308346 | 3.014484 |
| 12.57977 | 6.910013 | 5.979162 | 7.492908 |
| 1.452783 | 3.540369 | 4.53062  | 3.228958 |

|          |          |          |          |
|----------|----------|----------|----------|
| 6.183345 | 1.783776 | 1.356583 | 3.230449 |
| 3.515544 | 9.431049 | 9.544508 | 9.949409 |
| 1.234298 | 1.443135 | 1.285468 | 2.388762 |
| 65.91592 | 42.13913 | 41.40743 | 39.98481 |
| 39.74689 | 99.51534 | 93.05389 | 99.01613 |
| 1.562711 | 3.385185 | 4.146816 | 4.566302 |
| 59.67767 | 19.86733 | 17.62471 | 16.73658 |
| 3.159509 | 9.901914 | 9.448565 | 9.414317 |
| 33.20373 | 60.73177 | 58.77229 | 61.2934  |
| 1.565958 | 2.497389 | 3.183585 | 2.992064 |
| 85.53336 | 21.78613 | 19.27673 | 21.80892 |
| 33.53026 | 3.182426 | 3.284232 | 4.041367 |
| 0.782338 | 1.915119 | 2.853233 | 2.113091 |
| 7.759231 | 2.733968 | 2.745056 | 2.745802 |
| 0.765954 | 2.387019 | 1.754002 | 2.059974 |
| 1.625754 | 3.09057  | 4.346597 | 5.180698 |
| 0.287577 | 2.425434 | 2.314757 | 2.46147  |
| 3.957686 | 2.323101 | 1.981265 | 2.426432 |
| 21.11685 | 12.75545 | 10.10537 | 12.24662 |
| 0.971649 | 21.5007  | 13.90664 | 10.89924 |
| 33.4526  | 84.60955 | 85.31273 | 81.06933 |
| 44.24596 | 7.696945 | 7.407378 | 7.098218 |
| 9.665958 | 2.713116 | 1.567103 | 2.067739 |
| 2.229441 | 6.324002 | 6.844395 | 9.460469 |
| 7.698942 | 4.524683 | 4.005662 | 3.486133 |
| 0.062482 | 1.392056 | 0.959993 | 1.395058 |
| 3.426059 | 6.336041 | 5.283792 | 7.269665 |
| 1.43101  | 6.301603 | 4.004059 | 3.881206 |
| 1.635764 | 0.927355 | 1.01551  | 1.045454 |
| 3.433146 | 20.50812 | 21.20916 | 22.78065 |
| 2.889421 | 7.448895 | 6.326164 | 6.154204 |
| 12.46353 | 46.60312 | 42.4198  | 49.61893 |
| 0        | 0.710959 | 0.258104 | 0.346572 |
| 103.4926 | 50.91493 | 51.39639 | 51.89516 |
| 0.768227 | 5.554872 | 5.380331 | 5.562239 |
| 1.741939 | 4.600676 | 4.360351 | 4.517758 |
| 532.7345 | 676.7211 | 3488.774 | 252.9465 |
| 9.129787 | 4.264076 | 4.65414  | 4.964152 |
| 4.436909 | 6.589987 | 6.097445 | 5.629826 |
| 0.490221 | 0.404556 | 0.143438 | 0.188112 |
| 52.85165 | 104.2018 | 96.43033 | 108.2332 |
| 26.66861 | 9.682482 | 10.79381 | 8.440721 |
| 0.446821 | 1.918562 | 1.747206 | 2.001152 |
| 8.598693 | 26.53525 | 25.90259 | 27.46168 |
| 2.329709 | 5.409645 | 4.999299 | 6.343604 |
| 0.471916 | 0.351154 | 0.158501 | 0.411415 |
| 6.398807 | 22.61512 | 20.42845 | 22.40254 |
| 2.899247 | 1.696363 | 2.597759 | 2.28661  |
| 5.325989 | 6.764248 | 6.268874 | 7.02359  |
| 13.32108 | 13.81496 | 16.68656 | 14.78912 |
| 0.568339 | 1.415253 | 1.700103 | 1.66828  |

|          |          |          |          |
|----------|----------|----------|----------|
| 11.41572 | 3.267508 | 3.07765  | 2.490837 |
| 0.596442 | 1.247407 | 1.297138 | 1.325572 |
| 0.381764 | 2.857432 | 2.912142 | 2.894776 |
| 170.5793 | 44.94013 | 39.63629 | 45.05928 |
| 2.179992 | 0.663306 | 0.732742 | 0.34508  |
| 4.240739 | 1.124162 | 1.04372  | 1.478037 |
| 0.663012 | 2.164725 | 1.613827 | 1.727277 |
| 4.458673 | 8.719069 | 11.18337 | 8.884158 |
| 10.78657 | 10.9088  | 9.897779 | 9.831927 |
| 15.62363 | 5.982673 | 6.931429 | 6.983521 |
| 0.483764 | 1.146263 | 0.817098 | 0.842978 |
| 7.519105 | 3.191108 | 3.468531 | 3.150712 |
| 25.38224 | 39.7551  | 39.8509  | 40.14432 |
| 0.280286 | 0.914631 | 1.319168 | 0.682122 |
| 60.04539 | 9.361029 | 9.071824 | 10.61848 |
| 22.48904 | 23.76859 | 25.39442 | 23.82466 |
| 2.752358 | 9.791181 | 10.07101 | 10.3212  |
| 9.135048 | 1.845258 | 1.979779 | 2.441943 |
| 0.106231 | 0.642558 | 0.540462 | 0.445752 |
| 30.7125  | 28.21275 | 31.68247 | 27.5381  |
| 20.82191 | 6.638432 | 6.59141  | 6.543054 |
| 5.948236 | 2.032018 | 2.598176 | 2.554347 |
| 0.458006 | 1.818739 | 1.545414 | 2.212385 |
| 0.191335 | 0.902873 | 0.302179 | 0.643601 |
| 2.967186 | 6.599396 | 5.743391 | 6.472666 |
| 4.200151 | 1.602947 | 2.062322 | 1.526165 |
| 1.62276  | 1.651219 | 1.962299 | 2.662977 |
| 8.428451 | 1.897381 | 1.879759 | 1.920083 |
| 16.31841 | 5.78944  | 6.072067 | 5.34707  |
| 32.24344 | 15.41557 | 17.123   | 17.5966  |
| 34.15949 | 72.24307 | 68.04792 | 74.27752 |
| 4.344998 | 0.158058 | 0.223161 | 0.265802 |
| 3.994625 | 16.54939 | 16.36341 | 16.24818 |
| 14.63225 | 31.55966 | 35.24402 | 32.14919 |
| 0.694145 | 1.7934   | 1.828201 | 1.876543 |
| 0.685446 | 1.218822 | 1.904249 | 1.426063 |
| 8.408925 | 3.754961 | 3.670519 | 5.046577 |
| 4.35368  | 2.351471 | 2.897391 | 1.10914  |
| 72.51906 | 26.99039 | 25.9018  | 29.70824 |
| 3.243023 | 1.042844 | 1.235812 | 1.09184  |
| 15.59644 | 3.857866 | 3.215282 | 4.822063 |
| 18.23859 | 8.617771 | 9.83333  | 9.480837 |
| 3.333088 | 1.464626 | 1.598452 | 5.389181 |
| 1.402902 | 5.15697  | 5.283218 | 4.80141  |
| 250.9469 | 109.9999 | 109.7413 | 112.2096 |
| 12.9563  | 7.039283 | 5.852612 | 6.709594 |
| 50.91161 | 21.93722 | 21.58349 | 23.11482 |
| 29.88021 | 14.50483 | 15.44471 | 16.11771 |
| 1.382882 | 3.194046 | 3.111161 | 2.49863  |
| 1.158606 | 0        | 0.159292 | 0.47931  |
| 11.09592 | 16.98405 | 17.85792 | 15.62678 |



|          |          |          |          |
|----------|----------|----------|----------|
| 1.951855 | 8.40821  | 7.305643 | 6.760293 |
| 9.589801 | 15.1283  | 16.27366 | 16.81298 |
| 4.503147 | 2.846447 | 1.281907 | 2.179439 |
| 42.48082 | 3.109811 | 4.127958 | 3.704992 |
| 3.974745 | 1.911528 | 1.911145 | 2.575936 |
| 3.241508 | 0.49952  | 0.991348 | 1.292682 |
| 43.79654 | 12.72268 | 10.12064 | 9.41423  |
| 8.151782 | 32.64549 | 29.96594 | 34.61144 |
| 70.60773 | 32.45053 | 31.73388 | 35.88072 |
| 2182.348 | 517.3663 | 492.9647 | 532.6954 |
| 1.518045 | 6.144994 | 5.370648 | 6.034262 |
| 7.133463 | 2.867684 | 1.947802 | 2.981488 |
| 21.31866 | 50.92444 | 49.71596 | 55.31638 |
| 0.248656 | 0.829109 | 1.00732  | 0.658947 |
| 13.99765 | 6.448639 | 7.537504 | 6.663749 |
| 50.61841 | 7.568208 | 7.664351 | 7.737459 |
| 11.98492 | 9.594131 | 10.14339 | 9.989897 |
| 0.485485 | 2.155647 | 2.748471 | 2.792497 |
| 1998.317 | 301.3535 | 296.4619 | 304.3444 |
| 2.787399 | 3.185335 | 3.638147 | 5.906831 |
| 2.033163 | 0.853753 | 0.487034 | 0.893379 |
| 0.39235  | 2.299072 | 1.50241  | 1.862278 |
| 0.974655 | 1.436014 | 0.874556 | 1.176545 |
| 0.758515 | 0.459106 | 0.664831 | 1.10737  |
| 48.85168 | 12.79873 | 14.13751 | 15.26793 |
| 1.323654 | 0.640507 | 0.532405 | 0.847442 |
| 27.93254 | 14.09298 | 13.69944 | 13.91757 |
| 0.287327 | 1.363504 | 1.663845 | 1.690931 |
| 4.589464 | 6.269043 | 5.504262 | 5.94576  |
| 18.49092 | 5.762956 | 6.344011 | 4.506475 |
| 1.624777 | 7.706635 | 7.169679 | 6.213478 |
| 11.021   | 49.31178 | 44.73795 | 35.97491 |
| 7.830817 | 19.47883 | 20.776   | 20.5755  |
| 37.35766 | 7.804673 | 7.802514 | 7.999638 |
| 3.195924 | 1.573929 | 1.904008 | 2.402687 |
| 240.3526 | 66.61408 | 71.75485 | 72.54333 |
| 5.74643  | 6.373461 | 5.555155 | 5.103421 |
| 1.926935 | 1.217914 | 1.041844 | 1.09197  |
| 3.205491 | 1.434692 | 0.990312 | 1.127792 |
| 1.711661 | 1.18657  | 1.534032 | 1.292809 |
| 8.629546 | 10.81028 | 11.17224 | 12.25645 |
| 4.318899 | 2.689801 | 1.038988 | 2.052304 |
| 131.6657 | 43.93375 | 43.92418 | 45.84535 |
| 9.850934 | 10.30266 | 11.71921 | 11.67747 |
| 13.73218 | 4.787944 | 5.926248 | 4.434032 |
| 1521.619 | 199.6332 | 190.2341 | 197.0118 |
| 3.786505 | 7.926053 | 10.42053 | 7.940065 |
| 83.29812 | 92.77827 | 90.044   | 94.25657 |
| 18.52802 | 4.311295 | 5.332904 | 4.019253 |
| 7.69162  | 4.906532 | 4.738519 | 5.625443 |
| 151.7729 | 460.5725 | 468.2414 | 455.0367 |

|          |          |          |          |
|----------|----------|----------|----------|
| 2.895552 | 5.083154 | 4.928361 | 6.312597 |
| 78.43611 | 29.84519 | 24.90732 | 28.27114 |
| 12.98513 | 7.012779 | 5.789674 | 6.611075 |
| 0.199724 | 107.5948 | 104.0537 | 101.872  |
| 1.394647 | 1.927752 | 1.729095 | 1.781401 |
| 36.26335 | 17.05244 | 16.4992  | 16.88424 |
| 14.09203 | 7.476717 | 7.665991 | 7.848354 |
| 28.36103 | 5.592084 | 6.132286 | 5.132943 |
| 78.93936 | 133.5297 | 128.967  | 141.4628 |
| 3.238648 | 8.950845 | 9.024194 | 9.556555 |
| 131.1716 | 57.3485  | 59.95314 | 63.18136 |
| 3.502269 | 7.262938 | 6.260118 | 6.29254  |
| 12.29056 | 30.68463 | 31.31785 | 30.76878 |
| 2.780194 | 5.691972 | 4.79367  | 5.064552 |
| 39.62208 | 18.87654 | 18.149   | 19.45293 |
| 82.9391  | 22.55315 | 24.10859 | 24.82522 |
| 2.438243 | 9.480618 | 8.500732 | 8.757595 |
| 18.89608 | 6.868026 | 6.52585  | 7.327421 |
| 2.181491 | 16.8176  | 13.65002 | 15.73715 |
| 0.42524  | 1.114847 | 0.964259 | 1.323774 |
| 16.03974 | 39.8727  | 41.14884 | 42.72492 |
| 8.062101 | 17.57027 | 18.88773 | 21.35511 |
| 0.480105 | 1.192498 | 0.94813  | 0.960465 |
| 0.920517 | 2.664181 | 2.477105 | 2.195364 |
| 0        | 0.538278 | 0.71358  | 0.918174 |
| 37.57079 | 14.48707 | 12.2349  | 15.68445 |
| 0.387546 | 0.654432 | 0.991292 | 0.729354 |
| 0.708138 | 2.149101 | 1.605384 | 1.531159 |
| 2.304691 | 9.488844 | 10.41381 | 9.160621 |
| 1.681608 | 1.288884 | 0.976789 | 0.630152 |
| 1.227454 | 3.173481 | 3.206756 | 3.315324 |
| 3.811327 | 12.98616 | 12.44968 | 12.25049 |
| 2.392803 | 9.009709 | 9.302988 | 7.953722 |
| 1.280308 | 3.228144 | 2.318081 | 2.914653 |
| 3.619314 | 2.274242 | 1.630315 | 1.722526 |
| 0.199024 | 0.872922 | 1.044976 | 1.457014 |
| 4.05638  | 1.875627 | 1.167538 | 1.504314 |
| 4.770455 | 3.456613 | 3.009256 | 4.074147 |
| 2.530807 | 14.76172 | 13.66558 | 14.51407 |
| 21.00537 | 9.884576 | 10.04305 | 9.988511 |
| 7.616551 | 4.975914 | 4.821835 | 5.333847 |
| 0.612667 | 2.030931 | 2.622888 | 2.547481 |
| 2.646955 | 6.802884 | 4.215297 | 6.536694 |
| 0.467172 | 2.067175 | 2.777145 | 2.467722 |
| 0.382222 | 1.274429 | 0.781117 | 1.835491 |
| 1.703697 | 3.445013 | 2.451446 | 3.2912   |
| 0.828924 | 3.241995 | 3.190653 | 3.240858 |
| 3.062344 | 0.225366 | 0.035981 | 0.396675 |
| 8.919468 | 4.492126 | 4.469589 | 4.193652 |
| 0.554067 | 0.262536 | 0.275954 | 0.173521 |
| 9.944952 | 4.027722 | 5.176174 | 5.860678 |

|          |          |          |          |
|----------|----------|----------|----------|
| 17.96972 | 2.985725 | 2.913341 | 3.223669 |
| 14.40131 | 17.84512 | 19.2082  | 18.49894 |
| 14.23302 | 3.105099 | 2.215316 | 3.238703 |
| 49.46881 | 11.539   | 9.997207 | 9.232896 |
| 0.937192 | 3.603996 | 2.852371 | 1.821559 |
| 8.784871 | 5.920711 | 5.644121 | 6.241725 |
| 0.321353 | 1.304639 | 0.835165 | 1.678507 |
| 0.484081 | 5.24674  | 5.780078 | 5.736462 |
| 1.69746  | 1.203536 | 1.305391 | 1.357678 |
| 10.54424 | 3.419653 | 3.841205 | 3.273471 |
| 0.861533 | 2.492403 | 3.034361 | 2.889197 |
| 57.53336 | 28.06201 | 26.41331 | 28.2434  |
| 5.985734 | 16.00732 | 15.8032  | 17.62587 |
| 0.588477 | 4.295856 | 5.152966 | 5.731646 |
| 15.97654 | 8.487599 | 6.964947 | 6.985915 |
| 0.051887 | 0.275212 | 0.165586 | 0.060217 |
| 4.255413 | 6.093945 | 5.879056 | 6.674645 |
| 59.4637  | 155.3646 | 154.9776 | 154.7236 |
| 1.362608 | 4.576968 | 4.613513 | 6.10199  |
| 20.76571 | 44.83882 | 43.21991 | 48.49212 |
| 0.306949 | 1.078518 | 1.426985 | 1.105344 |
| 1.7604   | 6.738414 | 8.458189 | 8.13314  |
| 0.464637 | 9.171826 | 9.177889 | 9.497248 |
| 21.46604 | 25.80178 | 26.90105 | 27.25944 |
| 17.83491 | 29.78176 | 26.98276 | 34.89453 |
| 1.038418 | 1.864439 | 2.221186 | 1.985951 |
| 24.74965 | 2.867793 | 2.0105   | 1.81734  |
| 4.637288 | 9.782264 | 10.00117 | 9.852429 |
| 9.967009 | 5.119268 | 4.013474 | 4.501018 |
| 26.48503 | 56.14785 | 48.67874 | 61.37814 |
| 5.45362  | 1.558995 | 1.882601 | 2.202186 |
| 0.425095 | 2.088595 | 1.840079 | 1.293304 |
| 147.5265 | 34.18228 | 34.26315 | 38.79298 |
| 3.532888 | 7.40908  | 7.1342   | 6.375983 |
| 0.869117 | 0.200549 | 0.067975 | 0.089843 |
| 6.089661 | 8.185446 | 8.157726 | 7.519311 |
| 3.442101 | 5.78407  | 5.53579  | 6.292335 |
| 84.68829 | 33.21307 | 32.21144 | 33.82509 |
| 2.31139  | 6.393002 | 6.750365 | 6.306475 |
| 1.465023 | 5.229946 | 5.674379 | 7.144081 |
| 0.167575 | 0.990247 | 0.776258 | 0.779869 |
| 4.845608 | 20.97567 | 20.37911 | 22.2733  |
| 2.414126 | 10.41237 | 8.945703 | 10.72376 |
| 11.06807 | 9.842564 | 8.710093 | 11.1682  |
| 3.896209 | 0.82771  | 0.154821 | 0.854818 |
| 40.78411 | 16.79658 | 16.56823 | 17.05994 |
| 19.2804  | 33.70013 | 36.55955 | 36.94142 |
| 2.443022 | 32.02373 | 29.53688 | 30.76093 |
| 2.140801 | 4.449686 | 4.501641 | 4.646369 |
| 4.781357 | 5.253335 | 4.333576 | 4.753493 |
| 152.9654 | 79.62212 | 72.26852 | 77.10147 |

|          |          |          |          |
|----------|----------|----------|----------|
| 5.488275 | 2.944066 | 2.317659 | 2.392524 |
| 0.417625 | 1.064186 | 1.055127 | 1.355095 |
| 3.378865 | 0.369366 | 0.538766 | 0.258506 |
| 2.154126 | 1.892377 | 1.76691  | 1.543643 |
| 84.75716 | 21.41212 | 16.44986 | 18.24391 |
| 38.70134 | 22.28266 | 23.36302 | 26.17488 |
| 88.91173 | 189.3672 | 181.0652 | 193.5143 |
| 28.12453 | 42.46007 | 39.96248 | 41.71795 |
| 4.996007 | 4.864879 | 4.191255 | 4.128499 |
| 753.688  | 170.4986 | 185.9009 | 188.6148 |
| 0.615944 | 1.508536 | 0.865233 | 1.146417 |
| 4.27663  | 7.797681 | 8.418009 | 8.015805 |
| 229.1705 | 97.06457 | 95.84879 | 100.7776 |
| 3.407301 | 6.998532 | 7.605941 | 7.033021 |
| 7.068062 | 2.884805 | 1.869007 | 3.466839 |
| 15.79368 | 4.245513 | 4.828413 | 5.495277 |
| 4.612594 | 2.43032  | 1.727792 | 2.157969 |
| 326.7283 | 115.6333 | 121.5122 | 120.4074 |
| 0.388355 | 1.567608 | 1.84493  | 1.43273  |
| 5.254564 | 11.68636 | 12.59217 | 12.90955 |
| 12.47792 | 5.196348 | 4.878062 | 5.261605 |
| 2.657549 | 6.085032 | 5.815516 | 6.856198 |
| 13.29351 | 53.59965 | 48.618   | 52.33326 |
| 5.102929 | 50.2893  | 50.7712  | 51.55497 |
| 4.612168 | 1.106975 | 1.3147   | 1.269092 |
| 3.804741 | 7.457857 | 6.89265  | 6.593319 |
| 19.32917 | 7.553935 | 9.066195 | 6.906138 |
| 0.684296 | 0.239187 | 0.165002 | 0.334201 |
| 1.797403 | 0.924486 | 1.088425 | 1.283014 |
| 72.79522 | 32.20661 | 31.00027 | 34.9935  |
| 31.47314 | 12.48452 | 12.24342 | 14.39449 |
| 5.571004 | 3.36924  | 4.152348 | 2.63459  |
| 201.3627 | 103.9133 | 101.0402 | 102.3028 |
| 0.948092 | 2.254392 | 2.259197 | 2.600941 |
| 0.129787 | 2.171742 | 1.955645 | 2.778563 |
| 58.61968 | 29.63313 | 25.65694 | 29.13954 |
| 5.329629 | 5.318078 | 5.756801 | 6.452213 |
| 8.793765 | 3.320338 | 3.205551 | 3.064219 |
| 3.16811  | 9.396339 | 8.161904 | 8.725387 |
| 69.23744 | 16.51498 | 15.70307 | 17.04119 |
| 1.58053  | 3.140591 | 3.104824 | 3.790551 |
| 1.556496 | 0.633    | 0.514816 | 0.626135 |
| 0.911632 | 1.947854 | 1.41533  | 1.553054 |
| 3.582085 | 17.08951 | 19.24265 | 18.26803 |
| 2.173212 | 3.365476 | 3.592244 | 3.317387 |
| 12.78432 | 4.516099 | 4.727715 | 5.143527 |
| 2.682987 | 10.55408 | 12.20038 | 12.88093 |
| 0.464136 | 3.068433 | 3.019468 | 2.97153  |
| 40.05571 | 17.74762 | 17.20824 | 18.12298 |
| 20.63747 | 35.76101 | 35.71462 | 37.65131 |
| 51.99145 | 120.207  | 110.9931 | 116.1864 |

|          |          |          |          |
|----------|----------|----------|----------|
| 2.499797 | 0        | 0        | 0        |
| 184.9719 | 105.7536 | 104.1094 | 108.0772 |
| 1.103344 | 0.40649  | 0.074682 | 0.103649 |
| 53.47305 | 43.31648 | 42.29094 | 45.84513 |
| 1.464192 | 1.141529 | 0.806851 | 0.448393 |
| 56.50584 | 20.27083 | 20.94854 | 20.04207 |
| 0.25244  | 1.716298 | 2.370423 | 2.092304 |
| 4.269171 | 9.819082 | 7.230219 | 10.51271 |
| 0.842556 | 2.751739 | 2.75232  | 3.043242 |
| 3.366467 | 0.281376 | 0.649355 | 0.342939 |
| 11.47629 | 4.479836 | 4.791554 | 4.598333 |
| 13.20791 | 5.003831 | 4.771024 | 4.063441 |
| 0.870734 | 8.313408 | 6.074325 | 7.309136 |
| 212.5397 | 70.31677 | 72.25953 | 68.61888 |
| 9.944308 | 34.59235 | 32.29696 | 37.79991 |
| 0.411679 | 0.66522  | 0.888164 | 0.821358 |
| 21.01866 | 83.84485 | 85.86834 | 86.14482 |
| 14.79219 | 6.482555 | 4.67121  | 7.565681 |
| 3.245081 | 6.957688 | 6.061451 | 7.288152 |
| 2.147783 | 7.883041 | 7.506048 | 6.355174 |
| 684.3124 | 291.9735 | 289.9648 | 296.6735 |
| 1.3895   | 6.933112 | 6.334895 | 6.938052 |
| 3.340445 | 1.647722 | 1.917007 | 1.370035 |
| 0.807546 | 2.108921 | 2.11993  | 1.788949 |
| 0.219292 | 0.409755 | 0.412305 | 0.461975 |
| 4.967361 | 12.83982 | 13.4304  | 12.04565 |
| 8.415899 | 21.03715 | 17.99517 | 16.63058 |
| 0.231283 | 1.515446 | 0.907937 | 1.220894 |
| 1.913101 | 2.641787 | 2.697977 | 2.25356  |
| 14.82477 | 99.4761  | 99.95353 | 95.51472 |
| 0.493532 | 1.750069 | 2.125122 | 1.176196 |
| 1.958971 | 4.266464 | 3.892271 | 3.924382 |
| 4.909387 | 2.316372 | 3.017927 | 3.169601 |
| 25.67817 | 8.517497 | 8.362158 | 9.284179 |
| 87.90256 | 227.4302 | 225.279  | 230.9297 |
| 26.10388 | 299.5683 | 308.4613 | 318.2223 |
| 119.8114 | 58.5741  | 59.55688 | 63.84564 |
| 5.943805 | 3.124423 | 1.958811 | 2.816251 |
| 32.12666 | 9.281452 | 6.709191 | 7.426781 |
| 13.06097 | 2.179181 | 2.378604 | 1.43568  |
| 8.70456  | 3.949395 | 3.314074 | 2.85773  |
| 9.454124 | 6.295402 | 5.314369 | 5.418861 |
| 49.18517 | 15.1736  | 17.25332 | 16.4469  |
| 27.59444 | 64.89096 | 64.25351 | 65.92682 |
| 116.3846 | 50.20146 | 50.24947 | 51.629   |
| 3.644889 | 1.476732 | 1.579423 | 1.089674 |
| 0.499273 | 0.271867 | 0.235203 | 0.226706 |
| 4.384741 | 2.221528 | 1.780389 | 1.866763 |
| 225.3833 | 60.38762 | 54.18155 | 47.4804  |
| 48.35941 | 24.39339 | 23.25207 | 23.54634 |
| 341.3002 | 74.43957 | 70.69072 | 74.68497 |

|          |          |          |          |
|----------|----------|----------|----------|
| 81.34705 | 25.17135 | 23.39333 | 25.92402 |
| 1.912975 | 7.2208   | 7.703249 | 5.968449 |
| 0.331872 | 1.467944 | 1.299782 | 1.391636 |
| 112.82   | 15.04668 | 13.07742 | 11.74509 |
| 1.644854 | 0.577688 | 0.457793 | 0.726174 |
| 0.056712 | 0.797655 | 0.839471 | 0.886673 |
| 7.927667 | 2.494975 | 2.922782 | 3.04332  |
| 38.35247 | 19.39759 | 20.04485 | 19.59925 |
| 1.064367 | 2.076961 | 1.41745  | 1.438383 |
| 2.048638 | 4.585174 | 4.233764 | 4.441049 |
| 7.521403 | 31.10212 | 28.14869 | 29.07275 |
| 1.179038 | 1.601037 | 0.658407 | 0.831159 |
| 121.9686 | 55.29127 | 54.40336 | 58.34712 |
| 0.220633 | 0.750615 | 0.641568 | 0.678969 |
| 2.201238 | 4.498227 | 3.748374 | 4.481937 |
| 4.736721 | 3.574455 | 4.03632  | 4.295825 |
| 3.190423 | 14.70089 | 14.06472 | 16.34418 |
| 8.002615 | 7.664999 | 8.589667 | 9.210726 |
| 10.85818 | 3.617159 | 3.362697 | 3.223396 |
| 2.131413 | 1.275456 | 1.246049 | 1.039849 |
| 4.903834 | 6.99967  | 5.932739 | 6.131883 |
| 31.68885 | 60.84431 | 58.9484  | 65.35639 |
| 5.721495 | 7.655785 | 6.165214 | 8.009972 |
| 321.9311 | 1048.148 | 1010.478 | 1087.037 |
| 1.538975 | 13.38568 | 13.93698 | 13.44289 |
| 6.045664 | 0.919937 | 0.613716 | 0.978974 |
| 0.512743 | 1.1183   | 1.724358 | 1.287461 |
| 18.61956 | 36.48911 | 29.81903 | 36.86017 |
| 3.010308 | 9.595576 | 9.753558 | 9.819018 |
| 23.42516 | 10.24784 | 9.896236 | 10.04796 |
| 38.68759 | 19.31727 | 20.60033 | 18.59078 |
| 37.97746 | 13.19212 | 12.64829 | 13.73679 |
| 18.09838 | 4.931638 | 5.769799 | 6.769827 |
| 12.19505 | 29.57498 | 30.18478 | 29.85148 |
| 0.472681 | 1.012185 | 0.873439 | 0.580896 |
| 1.908524 | 2.115586 | 1.516612 | 1.362882 |
| 12.5474  | 4.801329 | 4.719092 | 4.543609 |
| 0.30975  | 3.977379 | 2.936812 | 4.039874 |
| 14.4268  | 34.62914 | 37.40799 | 37.32581 |
| 263.7744 | 103.1097 | 98.77956 | 103.9785 |
| 1.963193 | 6.341329 | 6.01563  | 4.861086 |
| 0.095122 | 2.970612 | 3.577869 | 3.6318   |
| 1.829083 | 0.154733 | 0.162166 | 0.160403 |
| 1158.213 | 394.7078 | 402.9862 | 422.2109 |
| 8.422481 | 11.47901 | 10.69467 | 13.90156 |
| 4.643733 | 9.183429 | 9.075886 | 9.729554 |
| 57.59387 | 17.35588 | 15.10963 | 17.8995  |
| 24.20321 | 16.62675 | 17.31156 | 17.29315 |
| 0.363929 | 1.902252 | 2.739661 | 2.194784 |
| 1.919551 | 3.582356 | 3.139506 | 2.582607 |
| 14.3227  | 45.83709 | 44.53016 | 47.51261 |

|          |          |          |          |
|----------|----------|----------|----------|
| 1.23677  | 2.040212 | 2.173857 | 2.106243 |
| 5.601902 | 3.208354 | 2.487715 | 2.570817 |
| 28.91235 | 99.38799 | 94.83015 | 104.3169 |
| 31.21483 | 59.23588 | 62.90564 | 61.58418 |
| 6.556512 | 4.641089 | 5.148353 | 5.363288 |
| 0.603299 | 1.616423 | 1.3246   | 1.051817 |
| 1.074739 | 1.2657   | 0.943684 | 0.467953 |
| 1.594663 | 3.365067 | 2.595052 | 3.221784 |
| 44.38182 | 9.232094 | 9.424466 | 9.664784 |
| 24.5804  | 59.52645 | 56.24896 | 65.29786 |
| 494.7368 | 195.1929 | 185.764  | 199.5094 |
| 4.038336 | 10.76083 | 10.08806 | 11.08354 |
| 2.376107 | 4.233584 | 4.185406 | 4.170912 |
| 1.268697 | 0.207538 | 0.150328 | 0.028426 |
| 1.330002 | 2.414678 | 2.193355 | 2.734296 |
| 1.365485 | 1.572533 | 1.594332 | 1.400084 |
| 15.92328 | 6.446652 | 7.513491 | 6.058055 |
| 41.9328  | 6.936758 | 7.386179 | 7.74764  |
| 2.015078 | 0.628994 | 0.856854 | 0.811148 |
| 0.411695 | 2.924741 | 1.721919 | 0.465525 |
| 9.278185 | 3.986423 | 3.204543 | 4.303741 |
| 18.40197 | 44.20436 | 41.03739 | 43.34086 |
| 9.697095 | 27.21221 | 25.12359 | 28.17585 |
| 8.690893 | 14.2819  | 10.31383 | 10.06496 |
| 22.33806 | 46.06785 | 48.70231 | 48.53941 |
| 10.16997 | 42.23832 | 41.25362 | 41.26067 |
| 24.13709 | 5.341609 | 5.653853 | 4.221667 |
| 0.418524 | 2.091551 | 2.764338 | 2.779938 |
| 6.298289 | 2.53139  | 3.828351 | 2.879868 |
| 2.852154 | 35.39388 | 30.5794  | 36.4469  |
| 10.51021 | 20.82477 | 20.23952 | 20.58012 |
| 66.13135 | 15.53926 | 15.02417 | 16.68955 |
| 4.422626 | 1.341652 | 0.990573 | 1.597543 |
| 16.99    | 25.54152 | 25.30188 | 25.18668 |
| 89.21357 | 44.36613 | 43.42746 | 46.62431 |
| 15.74677 | 2.222225 | 1.637882 | 1.529014 |
| 15.60922 | 58.85666 | 56.75435 | 59.68251 |
| 86.73235 | 32.61818 | 34.48712 | 35.96373 |
| 2.912572 | 1.704251 | 1.253026 | 2.143266 |
| 1.906349 | 1.109354 | 0.539115 | 0.707747 |
| 0.09673  | 1.293476 | 1.28539  | 1.051228 |
| 27.74632 | 54.63951 | 53.73938 | 59.26189 |
| 1.720937 | 17.19089 | 17.05034 | 16.60411 |
| 16.05528 | 1.65215  | 0.762832 | 1.519995 |
| 1.823719 | 1.943943 | 1.751391 | 1.641203 |
| 2.758143 | 1.117445 | 1.001607 | 0.969183 |
| 0.405166 | 1.756343 | 1.786882 | 1.02554  |
| 3.258522 | 2.034728 | 2.099385 | 2.125992 |
| 1.182005 | 4.69043  | 3.656654 | 4.234378 |
| 6.83823  | 12.51641 | 10.78302 | 11.52089 |
| 95.58005 | 7.145854 | 6.711005 | 7.188911 |

|          |          |          |          |
|----------|----------|----------|----------|
| 16.95246 | 58.32847 | 62.36072 | 62.81306 |
| 1.382497 | 0.328445 | 0.241636 | 0.282345 |
| 6.382485 | 14.03003 | 12.5531  | 15.59702 |
| 3.75813  | 1.948577 | 2.088553 | 0.916491 |
| 28.90126 | 7.900663 | 7.043558 | 7.981444 |
| 3.637066 | 1.40556  | 1.805187 | 1.509012 |
| 6.391018 | 1.645625 | 1.316318 | 1.432654 |
| 108.1236 | 74.228   | 77.19277 | 81.10324 |
| 55.51933 | 26.44941 | 25.83972 | 26.94558 |
| 3.098079 | 1.274933 | 1.411331 | 1.711812 |
| 0.900791 | 1.765122 | 1.940361 | 2.337805 |
| 1.805655 | 4.649761 | 4.288648 | 3.963944 |
| 1.297764 | 0.568314 | 0.866386 | 0.741435 |
| 9.675615 | 22.15632 | 21.01656 | 21.35193 |
| 29.30138 | 22.21066 | 21.64492 | 19.94297 |
| 0.648923 | 0.693191 | 0.667283 | 0.312271 |
| 0.350062 | 0.023929 | 0.130618 | 0.134981 |
| 6.466317 | 2.147517 | 2.423906 | 2.388588 |
| 4.538451 | 60.9308  | 56.82114 | 59.35289 |
| 4.944695 | 6.258923 | 6.182799 | 6.104066 |
| 1.460666 | 0.641675 | 0.3485   | 0.493128 |
| 0.471596 | 1.133676 | 1.4634   | 0.86794  |
| 21.36209 | 59.72499 | 57.9253  | 56.55055 |
| 15.80883 | 37.60319 | 40.4552  | 38.28546 |
| 14.21288 | 5.138221 | 5.73576  | 5.288278 |
| 11.95199 | 28.40224 | 29.84353 | 29.5128  |
| 0.26604  | 0.51661  | 0.86745  | 0.796914 |
| 23.437   | 8.942977 | 9.793006 | 10.65603 |
| 0.475028 | 2.467353 | 2.775219 | 2.767147 |
| 8.130912 | 2.61281  | 3.328688 | 3.384458 |
| 1.956634 | 7.362849 | 7.658038 | 6.57406  |
| 8.849677 | 5.226663 | 5.57957  | 5.233008 |
| 6.513768 | 2.5492   | 2.510711 | 2.966142 |
| 2.885539 | 7.948091 | 6.974935 | 7.26812  |
| 2.425419 | 1.864461 | 1.425795 | 1.406571 |
| 17.17736 | 8.745952 | 8.683775 | 8.211774 |
| 201.0774 | 384.1608 | 384.0693 | 394.3561 |
| 1.066188 | 0.225561 | 0.144764 | 0.193844 |
| 62.06754 | 42.57667 | 43.22532 | 45.61844 |
| 6.271221 | 10.24281 | 8.778695 | 9.484653 |
| 3.156612 | 0.626104 | 1.23017  | 1.425842 |
| 73.99373 | 33.7769  | 30.60207 | 39.20026 |
| 10.43193 | 8.421599 | 9.370635 | 9.875538 |
| 24.73822 | 9.499682 | 9.245467 | 9.47002  |
| 18.21029 | 10.34067 | 8.378501 | 10.04812 |
| 10.17422 | 3.08263  | 2.830209 | 2.459799 |
| 6.393818 | 3.851159 | 3.38266  | 3.759327 |
| 0.570189 | 4.640658 | 4.529261 | 4.460529 |
| 8.528708 | 19.49765 | 21.46839 | 19.43085 |
| 32.21191 | 12.40911 | 11.93365 | 12.96192 |
| 334.966  | 133.7482 | 131.0662 | 142.5204 |



|          |          |          |          |
|----------|----------|----------|----------|
| 509.4875 | 45.66131 | 46.35453 | 49.19455 |
| 0        | 9.319606 | 11.01894 | 11.38578 |
| 352.2936 | 156.9604 | 150.8821 | 151.5462 |
| 13.2495  | 5.348362 | 4.673523 | 5.395054 |
| 147.6766 | 26.07724 | 25.68156 | 26.05774 |
| 7.223191 | 14.10701 | 13.141   | 14.88627 |
| 19.55934 | 7.452436 | 6.854317 | 6.542027 |
| 0        | 1.962646 | 1.748892 | 1.65359  |
| 14.47693 | 177.8574 | 170.3524 | 180.9466 |
| 19.81066 | 29.23451 | 33.07415 | 30.91719 |
| 0.534254 | 0.953456 | 0.889804 | 0.683944 |
| 0.695281 | 1.925859 | 2.138902 | 2.585676 |
| 2.533528 | 1.244346 | 0.791694 | 1.18539  |
| 4.849298 | 3.706494 | 3.892432 | 3.40639  |
| 0.585281 | 2.942017 | 2.64906  | 3.241282 |
| 4.82952  | 4.073266 | 3.702511 | 3.816983 |
| 76.49947 | 1.701578 | 1.204714 | 1.425537 |
| 0.773402 | 2.688452 | 2.275676 | 2.326632 |
| 27.66059 | 12.97463 | 12.714   | 14.07015 |
| 63.7312  | 16.88072 | 18.73055 | 18.65067 |
| 1.242281 | 2.322147 | 2.375201 | 2.137442 |
| 307.3241 | 117.4433 | 116.924  | 122.6257 |
| 1.093757 | 0.89953  | 0.663525 | 0.669954 |
| 22.1858  | 6.383922 | 6.642047 | 6.170333 |
| 18.08654 | 5.772067 | 6.446456 | 5.436986 |
| 6.049775 | 2.69219  | 2.12781  | 2.153556 |
| 3.913162 | 2.712243 | 1.92198  | 2.442887 |
| 128.2683 | 57.44605 | 56.16079 | 62.24415 |
| 0.387207 | 0.309913 | 0.818245 | 0.834028 |
| 1.774372 | 1.152019 | 1.981452 | 1.760292 |
| 13.24084 | 54.30729 | 52.51135 | 55.15724 |
| 110.9012 | 24.70266 | 25.6122  | 23.28654 |
| 0.569567 | 0.927181 | 1.06256  | 1.551827 |
| 12.47415 | 24.88461 | 24.71611 | 26.46489 |
| 24.65403 | 18.03501 | 14.14252 | 13.15933 |
| 1.701421 | 3.869354 | 3.811796 | 4.561035 |
| 6.475008 | 27.29462 | 28.83056 | 28.7731  |
| 18.23755 | 6.851565 | 5.292369 | 6.997056 |
| 9.400594 | 3.46457  | 3.573127 | 3.895906 |
| 17.61056 | 5.927445 | 6.280954 | 6.873049 |
| 1.745747 | 15.44674 | 15.36832 | 15.04263 |
| 19.31061 | 23.08783 | 18.42091 | 24.8431  |
| 0.575804 | 4.509761 | 5.736449 | 5.242294 |
| 0.832901 | 5.141361 | 2.933041 | 5.087091 |
| 403.4267 | 190.8712 | 184.0823 | 189.7325 |
| 19.3007  | 8.135331 | 8.320552 | 8.120187 |
| 5.646252 | 13.91641 | 12.76148 | 16.37611 |
| 2.389101 | 1.356097 | 1.258308 | 1.027351 |
| 0.310395 | 1.65108  | 1.62541  | 1.818089 |
| 0.050445 | 0.831441 | 1.019856 | 1.080113 |
| 4.030206 | 24.961   | 23.27418 | 25.65452 |

|          |          |          |          |
|----------|----------|----------|----------|
| 3.400378 | 2.304383 | 1.810782 | 1.555616 |
| 7.822167 | 2.748551 | 3.128825 | 3.651342 |
| 0.304752 | 0.708053 | 0.633613 | 0.474981 |
| 71.04226 | 35.22972 | 36.82567 | 38.67127 |
| 0.114656 | 0        | 0.217484 | 0.377143 |
| 9.154376 | 33.19743 | 36.20444 | 36.48225 |
| 40.84038 | 12.45335 | 11.22731 | 11.11053 |
| 7.712676 | 5.789379 | 4.677543 | 5.112192 |
| 4.61852  | 13.51614 | 12.37968 | 12.1245  |
| 45.4339  | 18.46999 | 20.35589 | 21.01515 |
| 0.328914 | 5.654256 | 5.405748 | 6.009902 |
| 8.126526 | 23.54196 | 24.27333 | 23.87354 |
| 19.02024 | 55.13121 | 55.1107  | 54.25983 |
| 3.152437 | 3.279387 | 4.182528 | 3.248535 |
| 0.265056 | 1.14334  | 0.785134 | 1.11338  |
| 2.607294 | 9.25237  | 8.034269 | 9.308346 |
| 11.94749 | 158.9113 | 139.9389 | 148.3258 |
| 4.163548 | 12.25187 | 10.13771 | 11.57238 |
| 3.119345 | 7.507378 | 7.722825 | 7.447782 |
| 0.345368 | 12.00171 | 10.09211 | 10.80631 |
| 206.91   | 90.52514 | 93.02225 | 86.87375 |
| 211.3811 | 53.91579 | 55.12716 | 61.22165 |
| 2.887018 | 4.4081   | 5.180524 | 4.952575 |
| 426.4381 | 118.2699 | 115.6826 | 118.0799 |
| 7.955276 | 4.045336 | 3.571893 | 3.853395 |
| 2.711101 | 4.21099  | 4.551707 | 4.503732 |
| 1.144562 | 5.676932 | 4.743203 | 4.839046 |
| 1.887416 | 6.765439 | 6.449091 | 8.234945 |
| 18.81939 | 8.237399 | 8.790401 | 8.823393 |
| 1.235531 | 0.937225 | 1.015699 | 0.559951 |
| 3.965051 | 25.25249 | 25.54995 | 27.73254 |
| 12.19331 | 7.184525 | 8.51682  | 5.872799 |
| 9.910822 | 11.68813 | 10.3293  | 11.645   |
| 0.311132 | 1.404189 | 1.798231 | 1.506469 |
| 3.092928 | 13.31481 | 13.14064 | 13.03249 |
| 4.805848 | 4.163529 | 3.211543 | 4.14929  |
| 2.997009 | 1.072344 | 1.399122 | 0.718857 |
| 28.84763 | 3.557868 | 3.324115 | 3.466915 |
| 10.78254 | 22.94608 | 23.02679 | 20.71672 |
| 21.83715 | 9.389133 | 8.428531 | 8.143716 |
| 2.814967 | 1.349479 | 0.623523 | 1.233541 |
| 43.28851 | 32.06766 | 34.06413 | 34.52317 |
| 0.328214 | 1.202779 | 0.872511 | 1.586127 |
| 15.03413 | 6.556505 | 5.213233 | 6.1559   |
| 2.64547  | 1.403338 | 1.626981 | 1.638018 |
| 5.087352 | 2.237346 | 2.086783 | 2.206393 |
| 1.447394 | 8.316898 | 8.037974 | 8.376598 |
| 0.27805  | 0.747814 | 0.563548 | 0.677752 |
| 26.47582 | 10.34076 | 9.834036 | 11.98363 |
| 47.6285  | 25.63223 | 25.49307 | 26.90411 |
| 1.122386 | 1.965135 | 3.090808 | 3.369368 |

|          |          |          |          |
|----------|----------|----------|----------|
| 32.06121 | 1.578493 | 2.204312 | 1.284165 |
| 163.0716 | 430.7809 | 425.182  | 454.5972 |
| 15.34485 | 3.786067 | 4.730051 | 4.075879 |
| 40.15467 | 86.86855 | 81.03986 | 83.64668 |
| 0.227885 | 0.037646 | 0.052261 | 0.132144 |
| 2.497473 | 21.54606 | 22.10215 | 23.22261 |
| 4.726592 | 1.750628 | 3.1271   | 1.698585 |
| 2.111583 | 13.02594 | 11.62779 | 12.68716 |
| 0.394717 | 1.143679 | 1.197537 | 1.640449 |
| 4.434527 | 4.986941 | 4.684418 | 4.746604 |
| 73.02769 | 26.78365 | 27.48004 | 29.94667 |
| 5.967701 | 13.53129 | 14.0873  | 14.52474 |
| 1.263661 | 7.202063 | 7.212849 | 5.850447 |
| 6.407697 | 15.22746 | 14.27218 | 14.21685 |
| 18.84068 | 7.529672 | 6.824781 | 8.361923 |
| 5.200059 | 10.7107  | 10.49328 | 10.03434 |
| 15.17032 | 303.9427 | 315.2001 | 316.9718 |
| 1.341323 | 3.168007 | 2.95078  | 2.754802 |
| 3.075042 | 9.390282 | 6.461958 | 7.647593 |
| 4.023096 | 11.35705 | 11.66843 | 12.47347 |
| 0.226541 | 1.511001 | 1.444332 | 1.893084 |
| 17.42691 | 9.094116 | 7.920999 | 8.483747 |
| 4.641604 | 14.31246 | 16.19665 | 11.02578 |
| 10.66718 | 1.304906 | 0        | 0.59574  |
| 1068.434 | 298.8368 | 332.7068 | 319.6102 |
| 6.53722  | 8.90331  | 8.868863 | 8.914503 |
| 1.085406 | 0.601688 | 0.754521 | 0.631599 |
| 1.63736  | 4.869667 | 4.705107 | 4.904194 |
| 16.10099 | 49.5838  | 48.93479 | 48.08847 |
| 12.38472 | 32.2867  | 32.71528 | 34.34185 |
| 17.40659 | 4.744675 | 3.619789 | 3.90944  |
| 9.863923 | 4.493614 | 4.810159 | 4.929952 |
| 0.585852 | 1.610882 | 1.806968 | 1.483968 |
| 524.4494 | 263.2833 | 275.5085 | 287.4968 |
| 41.41515 | 20.5508  | 22.29743 | 21.18419 |
| 3.098618 | 1.855053 | 1.208683 | 1.312146 |
| 0.409257 | 1.188189 | 0.930486 | 1.169927 |
| 1.26637  | 2.798029 | 3.161353 | 2.849417 |
| 4.790048 | 4.04132  | 3.016256 | 2.736703 |
| 257.0035 | 14.02474 | 15.16753 | 14.21404 |
| 0.936818 | 1.954476 | 2.165651 | 1.82581  |
| 4.921034 | 2.569721 | 2.998293 | 2.825156 |
| 18.32998 | 44.78717 | 45.19636 | 46.43252 |
| 6.155556 | 17.03818 | 17.6424  | 19.13545 |
| 3.91898  | 13.51959 | 11.30966 | 14.1968  |
| 0        | 2.143809 | 3.002339 | 2.716666 |
| 8.10353  | 40.41834 | 35.38977 | 39.03205 |
| 20.97895 | 7.702855 | 7.936481 | 7.149021 |
| 7.130691 | 2.945876 | 2.565622 | 3.249171 |
| 15.15471 | 4.319649 | 5.193746 | 4.368393 |
| 29.57348 | 11.12826 | 11.3309  | 12.85572 |

|          |          |          |          |
|----------|----------|----------|----------|
| 6.006983 | 18.90143 | 20.30278 | 20.34155 |
| 0.151141 | 0.607119 | 0.906186 | 0.527172 |
| 8.376877 | 23.87563 | 23.14512 | 24.42842 |
| 6.08628  | 23.61399 | 23.58002 | 23.74689 |
| 2.010168 | 8.312028 | 8.211546 | 8.894263 |
| 0        | 1.025585 | 0.686843 | 1.057461 |
| 13.87864 | 3.052402 | 2.062829 | 2.980032 |
| 8.560661 | 1.764358 | 1.029237 | 1.496269 |
| 12.0691  | 33.70327 | 33.42538 | 33.92128 |
| 1.158056 | 0.739667 | 0.368181 | 0.783828 |
| 0.232437 | 3.051295 | 3.124845 | 1.162825 |
| 43.98199 | 132.4297 | 148.8883 | 151.5606 |
| 0.952028 | 2.302503 | 1.376196 | 1.823141 |
| 0.59869  | 1.159182 | 1.633348 | 0.664325 |
| 18.09568 | 10.53043 | 8.625387 | 10.21286 |
| 1.457533 | 3.06876  | 3.205071 | 3.02674  |
| 10.88991 | 2.771047 | 3.589781 | 2.711009 |
| 0.220508 | 0.036224 | 0.031421 | 0.025494 |
| 1.873567 | 3.122672 | 3.753247 | 4.799015 |
| 26.97257 | 9.769537 | 10.68021 | 10.97054 |
| 12.56756 | 0.608813 | 0.108136 | 0.146806 |
| 2.42999  | 1.364891 | 1.154966 | 1.443923 |
| 2.887213 | 3.147657 | 3.39357  | 3.269286 |
| 3.653667 | 1.42726  | 1.481392 | 1.571602 |
| 6.522809 | 23.78157 | 24.84494 | 23.62318 |
| 4.109146 | 12.1622  | 9.907739 | 11.33712 |
| 46.77266 | 52.149   | 50.40649 | 57.64201 |
| 57.7142  | 26.95044 | 26.63557 | 26.10256 |
| 0.427048 | 3.906112 | 4.033382 | 3.710283 |
| 11.71505 | 22.12145 | 21.17512 | 21.17484 |
| 94.42509 | 43.08774 | 42.95468 | 43.31597 |
| 16.9679  | 8.409664 | 6.124565 | 6.132257 |
| 7.95428  | 3.349133 | 2.902079 | 2.616078 |
| 21.85611 | 34.55634 | 34.84096 | 36.08124 |
| 2.726321 | 6.410616 | 5.858121 | 6.443262 |
| 2.429565 | 6.005867 | 5.601602 | 6.995622 |
| 11.47146 | 1.478318 | 2.08546  | 1.815765 |
| 329.5123 | 179.561  | 165.2559 | 176.6722 |
| 0.590523 | 2.272047 | 1.692624 | 2.582634 |
| 45.14722 | 21.08689 | 20.78576 | 22.18555 |
| 13.17724 | 75.9071  | 72.53359 | 70.78735 |
| 10.1452  | 38.37571 | 36.42827 | 39.4104  |
| 1.148485 | 0.360378 | 0.676203 | 0.671777 |
| 0.177653 | 5.492089 | 5.603359 | 5.302969 |
| 282.4898 | 89.42355 | 82.52675 | 90.0446  |
| 1.749822 | 3.020819 | 3.516946 | 4.129472 |
| 0.161304 | 0.581539 | 0.795931 | 0.886505 |
| 3.629168 | 3.687312 | 3.543219 | 4.52232  |
| 0.797142 | 0.013394 | 0        | 0        |
| 15.21361 | 3.452323 | 4.649018 | 4.365503 |
| 33.21737 | 7.678428 | 8.90349  | 9.113767 |

|          |          |          |          |
|----------|----------|----------|----------|
| 11.90325 | 8.663112 | 7.656416 | 8.637539 |
| 13.68897 | 32.27779 | 32.22038 | 33.55357 |
| 29.5294  | 9.758124 | 10.28807 | 10.75438 |
| 1.714379 | 0.71737  | 1.302151 | 0.664726 |
| 2.030151 | 6.273621 | 6.775393 | 7.086461 |
| 1.051142 | 0.147254 | 0        | 0.063637 |
| 2.507612 | 1.818572 | 1.676577 | 2.091259 |
| 10.76574 | 5.369492 | 4.848818 | 5.768399 |
| 65.18388 | 155.7366 | 152.0196 | 159.5207 |
| 3.127644 | 7.473997 | 7.694519 | 8.148767 |
| 8.71489  | 11.18833 | 10.66428 | 10.57391 |
| 2.289336 | 1.137479 | 1.466221 | 1.929953 |
| 7.080798 | 3.069582 | 4.197968 | 3.309752 |
| 1.367626 | 0.459573 | 0.547011 | 0.424313 |
| 2.957026 | 1.551853 | 1.530812 | 1.622063 |
| 6.281298 | 7.202224 | 6.365016 | 7.726864 |
| 19.37626 | 6.510294 | 7.262231 | 7.346113 |
| 3.355799 | 1.999598 | 2.026097 | 1.29534  |
| 181.9163 | 75.90051 | 76.06581 | 78.24752 |
| 3.325902 | 0.931993 | 0.6631   | 1.274273 |
| 1.883891 | 18.5252  | 18.50312 | 17.2167  |
| 10.83123 | 4.632217 | 5.302975 | 5.206623 |
| 7.572044 | 13.7563  | 14.90108 | 16.15397 |
| 0.676418 | 0.138083 | 0.182779 | 0.156011 |
| 13.5469  | 34.82712 | 31.28535 | 34.63318 |
| 0.31847  | 0.458114 | 0.476417 | 0.523245 |
| 48.03934 | 11.5095  | 12.62843 | 11.50937 |
| 5.107501 | 4.526077 | 4.225408 | 4.476308 |
| 0.61232  | 0.675884 | 1.301513 | 1.176367 |
| 1.460854 | 0.292636 | 0.271982 | 0.323023 |
| 3.835059 | 12.22044 | 11.3897  | 11.13298 |
| 35.58958 | 47.70329 | 44.64105 | 50.93531 |
| 2.45212  | 8.534163 | 7.230534 | 7.842941 |
| 307.8375 | 734.3957 | 722.8204 | 747.7983 |
| 4.521625 | 1.398501 | 0.919339 | 1.013776 |
| 0.90878  | 1.259863 | 0.868515 | 1.699672 |
| 4.417179 | 3.742618 | 3.526548 | 3.434711 |
| 0.276469 | 0.618946 | 0.475336 | 0.59853  |
| 3.356573 | 7.598326 | 6.876085 | 7.391901 |
| 1.646104 | 0.455152 | 0.482726 | 0.741258 |
| 0.633684 | 0        | 0.03542  | 0        |
| 5.165673 | 2.57139  | 2.275678 | 2.785319 |
| 30.01779 | 73.70988 | 71.57988 | 76.48507 |
| 51.48142 | 19.92052 | 20.46264 | 19.97298 |
| 44.70001 | 18.36268 | 19.30574 | 19.62483 |
| 78.93202 | 33.67284 | 32.67339 | 33.53027 |
| 0.438351 | 15.82917 | 13.46453 | 15.71317 |
| 3.386522 | 0.191773 | 0.411757 | 0.299101 |
| 6.054305 | 24.29705 | 27.32555 | 27.01304 |
| 1.40246  | 2.399801 | 2.704961 | 2.614448 |
| 0.892123 | 11.20984 | 10.23954 | 10.95273 |

|          |          |          |          |
|----------|----------|----------|----------|
| 7.978552 | 3.533403 | 3.628253 | 3.724694 |
| 8.63249  | 27.08366 | 25.62465 | 26.23273 |
| 579.6731 | 297.8929 | 287.5959 | 303.8262 |
| 14.50763 | 1.423554 | 1.605818 | 1.455242 |
| 1.59822  | 1.078831 | 1.240382 | 1.252726 |
| 13.65441 | 3.010578 | 2.87004  | 2.759321 |
| 3.569495 | 6.021496 | 5.607316 | 5.73079  |
| 1.86669  | 2.330239 | 2.23972  | 2.298111 |
| 0        | 1.58105  | 1.428514 | 1.947274 |
| 8.561257 | 21.53895 | 19.56803 | 20.90958 |
| 1.197498 | 0.570072 | 0.60869  | 0.671825 |
| 3.35406  | 15.5852  | 12.36358 | 13.93375 |
| 28.97424 | 84.37716 | 83.82121 | 85.45194 |
| 3.721404 | 7.794491 | 8.852393 | 8.193046 |
| 44.23628 | 3.136469 | 2.20829  | 1.736364 |
| 4.766898 | 10.60331 | 9.061683 | 12.24634 |
| 35.24871 | 12.00278 | 11.50074 | 15.63246 |
| 39.21977 | 71.98399 | 70.61308 | 77.04787 |
| 10.88362 | 5.846682 | 6.293787 | 5.768567 |
| 18.79861 | 42.51738 | 45.18229 | 45.26234 |
| 11.26181 | 0.210346 | 0        | 0        |
| 19.34047 | 8.809115 | 9.040733 | 10.62318 |
| 5.33361  | 2.024102 | 2.37158  | 2.223279 |
| 13.44483 | 4.717542 | 4.38946  | 5.29445  |
| 246.5501 | 113.8593 | 117.3378 | 115.7309 |
| 2.979003 | 3.706001 | 4.350432 | 3.860449 |
| 6.353142 | 11.16619 | 9.290977 | 11.93823 |
| 3.283283 | 1.235235 | 0.894258 | 1.312849 |
| 51.26328 | 1.621831 | 1.567557 | 0.823518 |
| 1.53713  | 4.067987 | 4.901145 | 4.110688 |
| 1.376025 | 2.56034  | 1.982546 | 2.27544  |
| 1.237201 | 0.776256 | 0.771939 | 0.720302 |
| 3.956562 | 4.18773  | 3.482252 | 2.951153 |
| 125.5893 | 75.13828 | 63.63039 | 69.34768 |
| 2.092641 | 0.640919 | 1.225909 | 0.793062 |
| 11.48803 | 23.77338 | 27.01866 | 25.48241 |
| 30.38614 | 82.23117 | 80.36817 | 84.84032 |
| 0.294987 | 2.733064 | 3.456858 | 4.243821 |
| 134.8773 | 368.3246 | 348.4386 | 382.438  |
| 17.3047  | 53.9808  | 56.06609 | 57.50135 |
| 1.029495 | 0.996845 | 0.908202 | 1.466557 |
| 9.621986 | 27.03177 | 25.78557 | 25.24869 |
| 0.82808  | 0.485293 | 1.466818 | 0.966346 |
| 0.106227 | 2.830166 | 2.851985 | 3.092981 |
| 0.353778 | 0.945746 | 0.725732 | 0.876167 |
| 2.034063 | 0.905509 | 0.632399 | 0.944981 |
| 0.088504 | 0.660567 | 0.897192 | 1.002186 |
| 1.498467 | 3.283437 | 2.892151 | 2.733925 |
| 2.282657 | 1.017396 | 1.507002 | 1.624183 |
| 0.322119 | 12.40997 | 11.97769 | 12.79788 |
| 7.17905  | 23.55598 | 22.3994  | 22.93418 |

|          |          |          |          |
|----------|----------|----------|----------|
| 3.002113 | 1.763564 | 2.382899 | 2.025561 |
| 325.3011 | 79.08449 | 83.12908 | 93.39987 |
| 0.726163 | 2.028605 | 2.599357 | 1.814448 |
| 36.90241 | 19.01679 | 20.60918 | 18.57173 |
| 116.6756 | 37.09065 | 33.92905 | 39.87297 |
| 7.529438 | 5.788105 | 5.910861 | 4.875108 |
| 0        | 0.279405 | 0.524897 | 0.311444 |
| 1.762844 | 8.197098 | 8.789066 | 9.13477  |
| 0.183794 | 0.720046 | 0.637084 | 0.717861 |
| 0.206485 | 0.284071 | 0.42184  | 0.405846 |
| 3.48973  | 29.60387 | 30.53004 | 28.01402 |
| 6.055633 | 7.102172 | 5.541075 | 5.989693 |
| 149.8893 | 105.7756 | 102.6723 | 113.454  |
| 171.447  | 384.4271 | 371.2318 | 392.5428 |
| 2.612589 | 4.278254 | 4.195871 | 4.278051 |
| 1.05106  | 2.764002 | 3.172624 | 2.366265 |
| 21.89875 | 49.39395 | 47.09427 | 58.44539 |
| 3.487196 | 35.31022 | 31.58196 | 37.11286 |
| 1.500735 | 2.847808 | 3.368701 | 3.307963 |
| 1543.606 | 452.4421 | 441.5118 | 468.9151 |
| 7.771221 | 2.746576 | 3.808521 | 4.108461 |
| 0.523885 | 6.234691 | 6.137276 | 5.143187 |
| 1.12685  | 3.162968 | 2.812957 | 3.29133  |
| 1.502051 | 0.533992 | 0.443492 | 0.744631 |
| 2.025071 | 4.724184 | 4.474272 | 4.96041  |
| 0.431396 | 0.783431 | 0.73414  | 0.479645 |
| 0.900424 | 1.12637  | 1.795356 | 1.440542 |
| 4.546642 | 11.95663 | 11.06765 | 12.25114 |
| 11.39899 | 21.05704 | 15.00886 | 18.20588 |
| 2.943144 | 1.455248 | 1.851217 | 1.328866 |
| 20.58248 | 5.647669 | 7.304044 | 6.656561 |
| 0.650534 | 1.334191 | 0.697331 | 1.124078 |
| 9.788404 | 33.35273 | 40.26818 | 31.03973 |
| 40.38606 | 197.9452 | 208.3799 | 211.1635 |
| 9.247882 | 35.3254  | 35.17247 | 37.38054 |
| 33.06    | 6.626568 | 6.842141 | 6.61437  |
| 1.214371 | 0.672502 | 0.424336 | 0.435976 |
| 1.087233 | 2.261841 | 2.767442 | 1.867298 |
| 59.25699 | 22.99468 | 22.01226 | 23.73659 |
| 16.19186 | 4.230421 | 3.739627 | 3.88572  |
| 5.03558  | 13.85626 | 12.71684 | 13.12431 |
| 1.838591 | 4.122446 | 5.120653 | 6.059005 |
| 7.107279 | 30.39707 | 26.66913 | 32.83253 |
| 0.647701 | 2.737492 | 3.403736 | 2.757213 |
| 3.503277 | 2.107223 | 1.519698 | 2.320115 |
| 12.52128 | 13.54054 | 10.87498 | 11.89506 |
| 4.26823  | 1.921932 | 2.215163 | 2.387692 |
| 7.420881 | 29.01408 | 22.79909 | 25.58608 |
| 77.67169 | 188.6885 | 181.1445 | 194.2495 |
| 2.362173 | 6.896014 | 5.543681 | 6.510707 |
| 7.38944  | 1.63664  | 1.742921 | 1.59344  |

|          |          |          |          |
|----------|----------|----------|----------|
| 22.32221 | 6.439133 | 6.332845 | 6.096808 |
| 17.93357 | 15.66482 | 14.707   | 15.53511 |
| 10.42032 | 48.05084 | 49.11336 | 49.94993 |
| 90.70016 | 9.220693 | 8.414872 | 8.622226 |
| 0.453526 | 1.185786 | 0.77702  | 0.449259 |
| 0.999297 | 0        | 0.104429 | 0        |
| 6.297576 | 1.374505 | 1.457505 | 1.056527 |
| 26.44272 | 43.84583 | 41.59958 | 49.41192 |
| 103.2566 | 36.26898 | 35.82042 | 35.51226 |
| 50.37486 | 5.674792 | 5.75863  | 6.23721  |
| 46.99002 | 10.43317 | 10.17437 | 10.10598 |
| 15.01847 | 34.83865 | 32.94576 | 33.25032 |
| 4.466709 | 2.446419 | 2.435983 | 2.287033 |
| 2.391554 | 7.447961 | 6.165512 | 7.17954  |
| 18.51954 | 8.854973 | 8.540111 | 8.383316 |
| 1.594381 | 2.543003 | 2.641201 | 1.773758 |
| 23.49096 | 22.41653 | 19.56792 | 23.26481 |
| 1.95522  | 15.50818 | 12.62044 | 14.5582  |
| 113.6304 | 29.62572 | 29.11331 | 32.57341 |
| 2.413517 | 1.046499 | 1.000609 | 1.266362 |
| 5.119977 | 20.30762 | 20.80721 | 23.35873 |
| 0.542888 | 2.308243 | 2.267293 | 3.243417 |
| 36.40598 | 20.09888 | 19.70482 | 21.74172 |
| 13.91797 | 3.782023 | 3.449336 | 4.616189 |
| 0.269021 | 5.319975 | 5.078673 | 5.406482 |
| 15.19369 | 16.3604  | 16.86899 | 19.06557 |
| 0.034061 | 0.572258 | 0.556511 | 0.281225 |
| 26.90978 | 46.12382 | 45.50829 | 48.51571 |
| 26.89254 | 111.1447 | 109.921  | 110.5505 |
| 0        | 2.371902 | 2.68534  | 3.078037 |
| 4.005276 | 7.862474 | 6.293838 | 7.153709 |
| 1.516465 | 0.56665  | 0.649207 | 0.554199 |
| 17.24881 | 18.99503 | 20.9338  | 17.74254 |
| 2.273167 | 1.172009 | 0.568885 | 1.394806 |
| 9.861819 | 3.224216 | 3.788067 | 4.36295  |
| 104.2227 | 27.69659 | 25.0037  | 28.56216 |
| 5.149916 | 14.24569 | 13.86345 | 15.9032  |
| 3.357553 | 10.13949 | 9.52764  | 10.91203 |
| 7.115659 | 2.170206 | 2.147621 | 3.029771 |
| 0.379777 | 1.73305  | 1.0508   | 1.469734 |
| 0.392281 | 0.770742 | 1.06048  | 0.949373 |
| 0.589329 | 1.324724 | 0.938932 | 1.387541 |
| 0.920405 | 2.834381 | 1.977686 | 1.729021 |
| 10.64372 | 5.034277 | 5.949839 | 4.435668 |
| 0.115187 | 0.328922 | 0.514321 | 0.363172 |
| 106.4523 | 45.03246 | 46.13585 | 49.72063 |
| 3.216958 | 23.25679 | 21.00607 | 25.03589 |
| 0.034647 | 0.062848 | 0.159273 | 0.32303  |
| 4.156197 | 8.937391 | 8.365932 | 9.069108 |
| 0        | 3.423635 | 3.184254 | 2.84626  |
| 0.695249 | 2.772542 | 2.055893 | 2.129681 |



|          |          |          |          |
|----------|----------|----------|----------|
| 0        | 1.376547 | 1.040109 | 1.310602 |
| 4.298357 | 10.36441 | 11.94454 | 11.57421 |
| 17.41467 | 3.962723 | 3.564326 | 3.97104  |
| 0.132985 | 2.429306 | 2.888287 | 2.115257 |
| 72.8963  | 26.51103 | 27.09954 | 29.57448 |
| 4.85701  | 15.34472 | 14.83518 | 13.8591  |
| 10.35244 | 5.419493 | 4.993245 | 5.844268 |
| 3.383272 | 1.262655 | 1.407524 | 2.062327 |
| 4.52253  | 1.616936 | 1.777221 | 2.524708 |
| 2.870727 | 10.01127 | 9.991632 | 9.73151  |
| 6.343106 | 4.82831  | 4.562386 | 5.30282  |
| 5.605394 | 18.52242 | 18.47329 | 18.40942 |
| 50.18637 | 7.910477 | 7.163184 | 8.129592 |
| 3.181332 | 5.548788 | 6.026774 | 6.061676 |
| 13.37521 | 5.34172  | 5.252274 | 4.652582 |
| 8.529448 | 0.851995 | 1.48418  | 1.153641 |
| 25.51942 | 77.66484 | 77.32119 | 81.26376 |
| 674.8208 | 85.30373 | 81.44946 | 86.24916 |
| 67.61018 | 15.18716 | 17.8428  | 17.08721 |
| 0.593225 | 0.500836 | 0.395666 | 0.308529 |
| 1.770749 | 5.037815 | 5.152478 | 4.74537  |
| 4.03462  | 7.370253 | 7.997854 | 8.22297  |
| 0.095186 | 117.6624 | 116.129  | 118.2571 |
| 27.83836 | 11.7415  | 11.86585 | 11.79654 |
| 4.655561 | 35.35623 | 31.12551 | 33.98923 |
| 1.91047  | 5.677522 | 6.239786 | 5.648723 |
| 1.713333 | 1.470376 | 0.589442 | 0.953851 |
| 0.428393 | 1.915017 | 1.987442 | 2.016932 |
| 1.282853 | 0.508361 | 0.655732 | 0.735712 |
| 7.28028  | 17.30581 | 15.32273 | 15.70291 |
| 0.509319 | 3.565278 | 2.65227  | 2.671099 |
| 208.9716 | 68.7881  | 71.43036 | 74.01779 |
| 1.465799 | 2.588543 | 2.409274 | 3.197173 |
| 29.05337 | 15.31464 | 14.35438 | 16.66818 |
| 26.65941 | 10.80087 | 13.01227 | 12.24161 |
| 247.7823 | 457.2376 | 423.1474 | 441.316  |
| 94.02041 | 57.22144 | 57.16557 | 61.09777 |
| 0.331258 | 1.270498 | 1.414779 | 1.219055 |
| 22.35568 | 10.63735 | 8.353164 | 9.623778 |
| 9.87655  | 4.307166 | 3.628151 | 3.538725 |
| 154.3541 | 607.23   | 598.6576 | 624.2145 |
| 28.5587  | 6.455221 | 5.399278 | 5.72192  |
| 4.345916 | 1.315068 | 1.637785 | 2.384391 |
| 169.7066 | 84.97629 | 85.37347 | 94.10728 |
| 1.914597 | 7.23185  | 8.052397 | 6.394349 |
| 0.986619 | 2.587461 | 1.547678 | 2.721411 |
| 0.751318 | 16.89434 | 16.38473 | 19.91821 |
| 5.671302 | 29.26329 | 27.45267 | 28.34642 |
| 0.522057 | 3.197555 | 2.531245 | 2.198539 |
| 0        | 0        | 0        | 0.172742 |
| 0.104719 | 1.309004 | 0.64212  | 0.929055 |

|          |          |          |          |
|----------|----------|----------|----------|
| 12.20727 | 5.978513 | 6.844945 | 7.471205 |
| 1.492861 | 0.262629 | 0.085024 | 0.090206 |
| 49.64228 | 24.04437 | 23.69487 | 25.46153 |
| 13.2359  | 57.6997  | 61.55894 | 57.68971 |
| 18.88007 | 66.7863  | 67.96747 | 69.67921 |
| 2.252463 | 0.582845 | 1.024208 | 0.728932 |
| 15.79425 | 8.727961 | 4.5762   | 4.95817  |
| 4.967592 | 33.96961 | 33.44615 | 33.96361 |
| 10.38134 | 7.243966 | 7.327518 | 6.315188 |
| 97.81894 | 978.1829 | 950.4409 | 998.3265 |
| 76.84487 | 22.81475 | 20.93091 | 23.05527 |
| 6.832481 | 0.879097 | 1.835908 | 1.316282 |
| 0.704569 | 1.304234 | 1.149904 | 1.280491 |
| 28.05183 | 59.66861 | 58.19704 | 61.39541 |
| 57.6258  | 8.995162 | 9.325445 | 8.802539 |
| 7.877886 | 13.52397 | 13.26697 | 12.37881 |
| 64.67913 | 27.40312 | 25.83044 | 28.52551 |
| 23.47304 | 8.660833 | 9.172629 | 9.954764 |
| 0.915326 | 1.826934 | 1.671013 | 2.13082  |
| 167.8511 | 75.94759 | 69.66772 | 83.77257 |
| 93.20614 | 36.24437 | 38.18232 | 40.44619 |
| 8.282012 | 23.77156 | 21.64061 | 23.78591 |
| 1.256139 | 6.393209 | 4.579165 | 4.931731 |
| 0.355612 | 0.143803 | 0.271581 | 0.068798 |
| 0.828043 | 0.085203 | 0.200573 | 0.090897 |
| 1.331511 | 1.315189 | 0.884624 | 0.861204 |
| 16.73923 | 1.569505 | 2.409818 | 1.869125 |
| 29.86937 | 15.73352 | 18.93279 | 18.11873 |
| 37.01783 | 9.619886 | 9.537137 | 11.743   |
| 657.2322 | 320.9769 | 311.9026 | 320.4931 |
| 36.99238 | 17.93475 | 20.03506 | 19.52569 |
| 22.72633 | 6.61034  | 7.277869 | 7.521034 |
| 8.456752 | 21.28132 | 20.29167 | 21.13489 |
| 20.19622 | 7.005733 | 6.648786 | 8.329268 |
| 2.313637 | 3.225632 | 3.548858 | 3.657033 |
| 29.70133 | 38.73212 | 38.0884  | 38.24115 |
| 0.638189 | 4.255776 | 4.387062 | 4.55137  |
| 2.875458 | 8.923254 | 6.952265 | 7.262758 |
| 23.69681 | 8.557429 | 8.575508 | 10.68342 |
| 1.144504 | 3.88855  | 4.160979 | 3.860914 |
| 22.04034 | 8.357809 | 7.746914 | 9.057244 |
| 1.335112 | 5.034451 | 5.289797 | 6.349348 |
| 5.710385 | 10.67732 | 12.80007 | 11.68328 |
| 0.775527 | 0.721266 | 0.24031  | 1.131847 |
| 4.40277  | 1.850337 | 1.982358 | 1.864155 |
| 348.0733 | 170.8669 | 154.0603 | 171.5685 |
| 0.613551 | 1.215991 | 1.093299 | 1.126102 |
| 0.578397 | 1.522644 | 1.248292 | 1.244281 |
| 4.473653 | 0.129473 | 0.383283 | 0.273011 |
| 1.384002 | 3.147032 | 4.160164 | 4.466585 |
| 17.57252 | 38.4228  | 36.6356  | 40.35141 |

|          |          |          |          |
|----------|----------|----------|----------|
| 11.99748 | 5.848609 | 6.134291 | 7.358882 |
| 1.916762 | 0.532104 | 0.367995 | 0.830324 |
| 6.495885 | 19.25758 | 16.26717 | 18.70296 |
| 13.67143 | 4.393239 | 4.284    | 3.577744 |
| 3.691643 | 2.086531 | 2.013867 | 2.168609 |
| 2.496897 | 4.329721 | 5.88031  | 7.057178 |
| 7.251283 | 1.897758 | 3.394285 | 2.897404 |
| 3.553349 | 0.730345 | 1.791815 | 1.463286 |
| 8.080823 | 1.947413 | 1.51927  | 2.199295 |
| 38.8317  | 20.84889 | 20.55864 | 18.26581 |
| 121.0989 | 42.01348 | 39.17751 | 42.84563 |
| 1.156086 | 3.654573 | 3.474627 | 4.211413 |
| 21.1308  | 68.29284 | 64.58974 | 70.08899 |
| 3.142099 | 0.76247  | 0.951044 | 0.650964 |
| 2.772018 | 6.348139 | 5.890443 | 6.283478 |
| 71.54008 | 150.9676 | 149.63   | 160.5693 |
| 9.538488 | 45.82997 | 45.28949 | 45.93369 |
| 1.885959 | 1.201102 | 0.623281 | 1.270053 |
| 0.423874 | 5.301853 | 5.796047 | 5.015355 |
| 1.745875 | 0.715796 | 0.606131 | 0.893418 |
| 0.293935 | 1.706813 | 1.254954 | 1.50932  |
| 3.468326 | 2.427177 | 1.578286 | 1.94352  |
| 5.518428 | 18.82973 | 19.83459 | 23.59282 |
| 34.89088 | 35.82585 | 34.58608 | 35.51462 |
| 0.050207 | 1.559178 | 1.232008 | 0.889228 |
| 35.61435 | 12.39724 | 13.49195 | 14.6484  |
| 27.49933 | 8.308639 | 9.439728 | 9.98633  |
| 2.457091 | 0.879561 | 0.950158 | 0.993815 |
| 18.8559  | 13.4771  | 13.97485 | 13.99258 |
| 7.757784 | 2.7396   | 3.054565 | 2.876216 |
| 5.909558 | 2.254441 | 2.373517 | 2.49784  |
| 5.788276 | 1.95282  | 1.637236 | 2.113602 |
| 6.901008 | 3.740926 | 4.006235 | 3.089948 |
| 5.062727 | 0.265742 | 0.654666 | 0.969845 |
| 0.575293 | 1.027934 | 1.143228 | 1.032022 |
| 63.79604 | 31.09057 | 33.13115 | 32.44155 |
| 0.193454 | 0.34395  | 0.326066 | 0.404229 |
| 19.82846 | 44.86474 | 44.55886 | 46.076   |
| 1.781237 | 4.330705 | 3.512848 | 3.491099 |
| 1.541705 | 8.122618 | 6.750433 | 7.845208 |
| 1.984276 | 1.377458 | 1.89584  | 1.606085 |
| 2.650118 | 6.950951 | 6.944346 | 7.19282  |
| 0.052136 | 11.31759 | 9.575999 | 10.53227 |
| 5.715341 | 8.404255 | 7.851437 | 8.32107  |
| 2.01969  | 19.27736 | 15.32305 | 17.25412 |
| 9.201688 | 2.146285 | 1.556525 | 2.060972 |
| 144.0374 | 50.20404 | 49.84984 | 52.45572 |
| 1.84695  | 4.242834 | 4.854116 | 5.153685 |
| 2.192467 | 1.117362 | 1.099327 | 1.168198 |
| 25.68561 | 71.93298 | 68.18879 | 66.6786  |
| 1.248843 | 0.216093 | 0.336703 | 0.143147 |

|          |          |          |          |
|----------|----------|----------|----------|
| 15.68756 | 34.25955 | 34.97633 | 36.14898 |
| 1.936858 | 17.79491 | 17.07536 | 19.51551 |
| 27.29859 | 4.834034 | 3.568151 | 3.425107 |
| 0.323434 | 0.766593 | 1.022277 | 1.17686  |
| 11.1288  | 1.864322 | 1.807088 | 1.49191  |
| 49.79313 | 0.424964 | 0.427415 | 0.589549 |
| 4.376652 | 78.13828 | 69.91958 | 76.64995 |
| 1.865496 | 0.888175 | 1.319871 | 0.547164 |
| 0.604897 | 1.611583 | 1.788058 | 2.18298  |
| 7.812254 | 3.460688 | 1.974586 | 1.881618 |
| 2.484132 | 1.059436 | 1.302227 | 1.373431 |
| 54.12344 | 30.38721 | 29.16496 | 30.13678 |
| 16.56563 | 80.01048 | 80.55486 | 84.9469  |
| 23.6731  | 11.99658 | 11.62844 | 13.51269 |
| 22.46532 | 44.25374 | 41.99936 | 47.56245 |
| 32.39779 | 33.98277 | 33.34928 | 38.78491 |
| 0.854901 | 0.856476 | 1.153092 | 1.168141 |
| 8.993104 | 0.170698 | 0        | 0.112784 |
| 1.185416 | 2.623008 | 2.291751 | 2.517479 |
| 17.0415  | 27.52883 | 22.17084 | 28.92999 |
| 67.82225 | 23.53875 | 21.85747 | 23.25646 |
| 38.27295 | 0.706576 | 0.787272 | 1.08563  |
| 1.091845 | 2.620441 | 2.738704 | 3.356625 |
| 63.28509 | 21.56828 | 21.31926 | 22.7905  |
| 1.560869 | 1.271467 | 1.010054 | 0.796457 |
| 3.740389 | 6.001461 | 6.563195 | 6.345337 |
| 244.5941 | 864.475  | 865.4366 | 899.7587 |
| 174.8736 | 73.34827 | 76.6237  | 77.33501 |
| 1.32761  | 15.07131 | 13.8652  | 14.64722 |
| 9.524584 | 27.35693 | 28.41592 | 31.12093 |
| 2.359895 | 9.89622  | 9.173236 | 10.36439 |
| 1.778078 | 0.594064 | 0.7709   | 1.389638 |
| 126.1499 | 55.10653 | 51.47038 | 53.74658 |
| 140.0123 | 33.7547  | 29.57943 | 34.53739 |
| 0.877529 | 0.305808 | 0.322754 | 0.303132 |
| 4.100953 | 2.710878 | 0.941766 | 2.096214 |
| 16.37637 | 37.54095 | 34.3474  | 37.22996 |
| 0.057352 | 0        | 0.060804 | 0        |
| 6.036432 | 2.974862 | 2.437001 | 3.191163 |
| 13.60477 | 33.02474 | 34.69563 | 35.85644 |
| 2.232906 | 12.23366 | 9.994707 | 11.2029  |
| 0.092918 | 0.519743 | 0.553068 | 0.551709 |
| 0        | 0.098243 | 0        | 0        |
| 32.3299  | 3.794788 | 2.900103 | 4.845628 |
| 6.163211 | 12.63892 | 12.89347 | 14.30476 |
| 0.27002  | 1.19385  | 1.507614 | 1.349276 |
| 10.68431 | 13.45736 | 10.81674 | 11.577   |
| 3.094666 | 6.896147 | 6.774506 | 6.745478 |
| 0.760999 | 5.357085 | 4.684281 | 4.600691 |
| 1.788654 | 3.445612 | 3.045359 | 3.026907 |
| 0.323451 | 0.596305 | 0.225777 | 0.770048 |

|          |          |          |          |
|----------|----------|----------|----------|
| 0.6446   | 1.905048 | 1.188451 | 1.306808 |
| 36.36828 | 14.89431 | 14.00152 | 14.92318 |
| 3.71824  | 10.73776 | 10.01212 | 11.09802 |
| 2.095455 | 41.49804 | 43.86858 | 47.32835 |
| 178.705  | 64.57551 | 62.38635 | 65.41052 |
| 8.116193 | 6.412858 | 6.437209 | 5.802431 |
| 41.96198 | 95.09244 | 92.70649 | 97.59861 |
| 1.058779 | 0.033506 | 0.723651 | 0.35278  |
| 91.45948 | 16.66226 | 18.13054 | 18.56327 |
| 5.627598 | 1.547318 | 1.654017 | 1.410019 |
| 3.144976 | 5.902233 | 6.283094 | 7.046    |
| 29.92689 | 10.92449 | 10.67461 | 11.43244 |
| 266.6194 | 80.50586 | 72.05338 | 77.23686 |
| 8.612712 | 77.52734 | 81.32687 | 79.59988 |
| 4.998322 | 11.24792 | 10.5143  | 12.20967 |
| 1.363416 | 0.840201 | 0.649451 | 0.752829 |
| 10.44176 | 3.657462 | 3.449258 | 4.916811 |
| 5.281606 | 24.70913 | 26.67685 | 23.42381 |
| 0.602623 | 0.577225 | 0.15154  | 0.431877 |
| 0.659283 | 1.37328  | 1.604622 | 1.819237 |
| 2.634562 | 11.68301 | 10.69398 | 9.592031 |
| 2.591289 | 5.006251 | 4.49358  | 3.673512 |
| 14.40709 | 4.261497 | 4.075001 | 3.747213 |
| 2.319478 | 5.886158 | 4.288985 | 3.864784 |
| 3.265194 | 4.67769  | 5.528859 | 5.519678 |
| 1.157839 | 34.74657 | 33.33198 | 38.25584 |
| 4.249523 | 8.563939 | 10.70395 | 10.13747 |
| 6.307643 | 13.14853 | 11.92265 | 13.21669 |
| 1.112264 | 0.622066 | 0.302568 | 0.214682 |
| 341.9252 | 96.67493 | 100.1565 | 101.8176 |
| 13.93157 | 37.31541 | 33.92279 | 35.34948 |
| 28.26964 | 14.73697 | 13.78537 | 14.94413 |
| 0        | 0.019716 | 0.063801 | 0        |
| 8.392231 | 5.310003 | 5.265265 | 5.111712 |
| 2.330751 | 10.0933  | 8.961681 | 8.911663 |
| 213.3488 | 462.1554 | 445.08   | 466.1829 |
| 0        | 1.739445 | 2.290133 | 1.598471 |
| 6.483886 | 5.859413 | 6.14448  | 6.658331 |
| 184.0895 | 67.39542 | 69.95245 | 71.13522 |
| 141.5006 | 42.02842 | 39.8286  | 41.45969 |
| 1.676555 | 2.991169 | 3.793094 | 3.359277 |
| 17.84931 | 34.38048 | 35.89361 | 35.28446 |
| 10.24636 | 5.982056 | 5.649343 | 6.793808 |
| 87.53083 | 277.6803 | 287.8642 | 283.1209 |
| 4.622121 | 11.54063 | 10.87074 | 11.52951 |
| 6.460721 | 23.73026 | 22.66374 | 24.31492 |
| 0.418722 | 1.424018 | 1.144946 | 1.373882 |
| 23.07453 | 5.301523 | 6.277909 | 7.043033 |
| 2.080453 | 3.609236 | 3.305512 | 5.158066 |
| 2.747078 | 0.876804 | 0.505608 | 1.197649 |
| 6.30225  | 22.27868 | 19.89674 | 22.90538 |

|          |          |          |          |
|----------|----------|----------|----------|
| 16.55702 | 40.72646 | 44.42925 | 43.29306 |
| 11.3861  | 5.358254 | 5.686592 | 5.623058 |
| 603.6411 | 874.9288 | 891.6483 | 890.7057 |
| 1.224647 | 0.621164 | 1.245646 | 0.917515 |
| 1.304313 | 0.742375 | 1.26963  | 0.369738 |
| 20.74422 | 9.532708 | 7.885776 | 9.011481 |
| 2.664149 | 5.333421 | 5.500944 | 4.318552 |
| 3.809733 | 9.736191 | 10.64998 | 9.385533 |
| 1.540681 | 5.695271 | 4.767387 | 5.336854 |
| 163.9211 | 48.57878 | 45.79341 | 47.84573 |
| 446.5807 | 1522.065 | 1557.941 | 1579.808 |
| 4.555724 | 1.599916 | 2.184946 | 1.687443 |
| 1.252494 | 0.761506 | 0.881591 | 1.437554 |
| 1.344441 | 2.30686  | 2.02967  | 2.849755 |
| 0.094586 | 1.094117 | 0.9429   | 0.781146 |
| 2.670489 | 7.034276 | 8.602505 | 7.175504 |
| 2.03544  | 1.220987 | 1.3271   | 1.901611 |
| 29.21887 | 93.21309 | 99.26148 | 101.7198 |
| 8.736552 | 77.01634 | 78.10017 | 80.68325 |
| 19.37138 | 8.4543   | 8.146256 | 8.762234 |
| 319.7361 | 141.3087 | 133.1423 | 144.2414 |
| 0.46764  | 2.191843 | 2.199857 | 2.557572 |
| 6.493117 | 0.208036 | 0.253498 | 0.358434 |
| 2.091097 | 0.483187 | 0.503498 | 0.772362 |
| 1.986197 | 4.411537 | 6.197901 | 6.371791 |
| 3.667166 | 1.313553 | 2.053673 | 2.092759 |
| 4.048473 | 8.071682 | 8.573597 | 9.262786 |
| 17.21904 | 43.98985 | 42.3585  | 42.72863 |
| 3.560923 | 0.404819 | 0.479783 | 0.598192 |
| 2.465525 | 4.906    | 5.307242 | 5.720555 |
| 0.038439 | 2.310722 | 1.565328 | 1.820249 |
| 1.016653 | 3.216199 | 1.744365 | 3.148779 |
| 31.72845 | 11.34543 | 15.53066 | 12.91616 |
| 0.187697 | 1.424809 | 1.724734 | 1.883201 |
| 4.644854 | 1.985573 | 1.860829 | 0.956898 |
| 3.901965 | 5.107907 | 6.322112 | 7.637149 |
| 1.447327 | 5.572765 | 5.703093 | 5.424137 |
| 0.241547 | 0.110462 | 0.091255 | 0.145994 |
| 14.07994 | 1.028079 | 0.597535 | 1.156279 |
| 10.47429 | 4.094285 | 3.68322  | 3.989008 |
| 1.696379 | 1.095467 | 0.639199 | 1.084454 |
| 21.34938 | 7.836276 | 8.559851 | 8.075712 |
| 3.202737 | 14.18337 | 13.82773 | 13.89882 |
| 19.41328 | 62.76567 | 63.6709  | 62.35409 |
| 17.73682 | 8.701973 | 8.822829 | 9.266446 |
| 778.0128 | 363.5601 | 353.7912 | 367.2855 |
| 18.70906 | 7.661597 | 6.414737 | 6.575195 |
| 9.632833 | 14.36092 | 16.00508 | 18.39718 |
| 12.11935 | 5.666168 | 5.106711 | 5.809879 |
| 0.436353 | 3.470557 | 2.893321 | 3.867331 |
| 27.42178 | 47.56379 | 49.797   | 43.15762 |

|          |          |          |          |
|----------|----------|----------|----------|
| 1.189825 | 1.830905 | 1.233438 | 1.355943 |
| 0.145546 | 0.817467 | 0.625839 | 0.812345 |
| 2.265659 | 0.755952 | 1.463569 | 1.10608  |
| 11.68498 | 25.35503 | 22.68972 | 26.41408 |
| 21.26672 | 31.18824 | 26.40039 | 28.89606 |
| 13.94951 | 35.91087 | 32.47757 | 30.71866 |
| 8.171395 | 14.71114 | 13.55011 | 15.0238  |
| 0        | 0        | 0        | 0        |
| 0.532765 | 1.820851 | 1.533829 | 1.865529 |
| 19.12196 | 22.67051 | 19.76314 | 24.48434 |
| 2.934596 | 1.90022  | 1.580808 | 0.845822 |
| 210.508  | 74.51325 | 87.14299 | 80.85823 |
| 27.05244 | 51.85852 | 50.24046 | 48.17497 |
| 1.330438 | 6.47336  | 6.161107 | 3.544106 |
| 6.792552 | 3.298699 | 3.108408 | 3.257547 |
| 3.806785 | 6.608587 | 8.977714 | 8.95779  |
| 0.766062 | 0.742079 | 0.496287 | 0.422458 |
| 5.558387 | 1.175533 | 1.393984 | 1.199236 |
| 18.95327 | 34.16496 | 35.27545 | 34.13302 |
| 38.34007 | 5.554248 | 5.015687 | 5.163662 |
| 12.3724  | 8.764182 | 8.698568 | 7.975476 |
| 123.4618 | 51.64082 | 45.43616 | 47.08168 |
| 0.292473 | 0.332916 | 0.296735 | 0.307615 |
| 0.468533 | 0.904398 | 1.380511 | 1.147778 |
| 0.551112 | 1.141449 | 1.010827 | 1.219348 |
| 1.373347 | 0.47789  | 0.439361 | 0.165404 |
| 1.552813 | 10.30028 | 10.1756  | 11.30118 |
| 0.280134 | 0.200677 | 0.202222 | 0.123455 |
| 5.450592 | 14.6652  | 13.76593 | 16.21473 |
| 5.791748 | 1.907313 | 1.937109 | 2.346711 |
| 1.44174  | 9.601016 | 9.794322 | 11.27848 |
| 3.012243 | 9.969966 | 9.438548 | 6.983147 |
| 3.665788 | 2.384337 | 1.018987 | 2.177108 |
| 0.099585 | 0.655865 | 0.495132 | 0.511003 |
| 0.415155 | 4.109057 | 3.25107  | 5.269628 |
| 0.978355 | 5.315879 | 5.270523 | 4.858573 |
| 0.247072 | 1.894715 | 1.696672 | 1.734806 |
| 2.838929 | 9.744388 | 7.138459 | 6.361077 |
| 6.043643 | 3.486182 | 1.930161 | 2.690668 |
| 6.109917 | 3.128069 | 2.526666 | 2.669601 |
| 10.11181 | 27.42328 | 27.61399 | 27.43706 |
| 2.172482 | 0.721117 | 0.748335 | 0.345097 |
| 0.389806 | 11.84626 | 11.00497 | 13.21979 |
| 2.535055 | 5.283893 | 4.566782 | 5.666511 |
| 9.733066 | 21.02949 | 21.89559 | 22.17812 |
| 184.6559 | 78.80905 | 76.47264 | 79.69182 |
| 0.577989 | 4.074832 | 3.202954 | 4.183364 |
| 6.82452  | 15.00422 | 13.6009  | 14.97271 |
| 5.583044 | 0.486069 | 0.291207 | 0.316957 |
| 10.19722 | 22.94569 | 21.31684 | 21.21497 |
| 8.424339 | 4.249778 | 2.607542 | 4.019789 |

|          |          |          |          |
|----------|----------|----------|----------|
| 13.49526 | 6.143462 | 6.111877 | 6.925503 |
| 115.4417 | 63.38859 | 62.37306 | 66.62066 |
| 231.2905 | 49.44141 | 44.74751 | 45.54614 |
| 0.28218  | 1.836164 | 1.617385 | 1.355676 |
| 1.713328 | 1.091367 | 1.382343 | 1.620468 |
| 8.647775 | 2.040798 | 1.647912 | 1.444616 |
| 2.143274 | 3.067106 | 2.746467 | 3.755882 |
| 7.954521 | 3.982012 | 3.759163 | 3.374144 |
| 0.242213 | 0.369891 | 0.480781 | 0.401117 |
| 246.9542 | 112.071  | 112.6805 | 112.9279 |
| 16.13018 | 5.869268 | 6.763721 | 6.463983 |
| 829.7936 | 875.4985 | 815.4225 | 886.0421 |
| 4.409328 | 9.714348 | 8.682838 | 10.0148  |
| 3.588745 | 0.463926 | 0.268853 | 0.784885 |
| 4.574049 | 16.84124 | 16.98233 | 18.69523 |
| 5.658747 | 0.999896 | 0.792142 | 0.847043 |
| 10.58418 | 5.425667 | 4.872385 | 3.070271 |
| 581.8544 | 223.8352 | 230.2247 | 237.9308 |
| 9.028335 | 4.764496 | 3.747025 | 2.79179  |
| 0.791562 | 1.928422 | 2.200876 | 2.130675 |
| 2.306916 | 3.967285 | 4.80171  | 4.138408 |
| 9.467732 | 22.54201 | 21.53868 | 20.38964 |
| 2.89789  | 5.613208 | 5.588025 | 5.987005 |
| 0.636233 | 1.306053 | 0.980312 | 0.894108 |
| 0.453489 | 0.883    | 1.113682 | 1.227605 |
| 22.40179 | 10.5178  | 11.00573 | 11.58031 |
| 1.838372 | 3.331437 | 2.961878 | 3.056208 |
| 10.18938 | 26.62283 | 25.79249 | 27.37047 |
| 130.8458 | 57.68115 | 56.59925 | 63.91733 |
| 1.808018 | 12.38543 | 12.14622 | 13.68673 |
| 63.83255 | 58.31194 | 58.76395 | 62.03875 |
| 19.41527 | 6.761888 | 5.409159 | 6.525705 |
| 2.186452 | 4.897048 | 4.255694 | 5.042689 |
| 4.473192 | 2.124249 | 1.29493  | 1.406606 |
| 1230.966 | 267.6985 | 241.5475 | 257.5261 |
| 1.054908 | 3.934065 | 3.130615 | 2.704164 |
| 33.71287 | 3.852776 | 5.603612 | 5.564179 |
| 3.875397 | 0.651442 | 0.842329 | 0.911535 |
| 5.877862 | 14.69288 | 14.40892 | 15.16367 |
| 6.546    | 3.98891  | 3.671484 | 3.304982 |
| 2.235373 | 8.111811 | 3.863321 | 4.691135 |
| 11.95663 | 19.62092 | 18.15822 | 19.41076 |
| 4.539655 | 1.215074 | 1.692758 | 1.384096 |
| 1.653907 | 8.140662 | 6.593576 | 8.284747 |
| 2.386456 | 2.956207 | 2.319928 | 2.882977 |
| 59.41291 | 29.62002 | 29.08129 | 29.70564 |
| 0.146184 | 0.648795 | 0.911913 | 0.830007 |
| 5.628858 | 3.672092 | 3.384351 | 3.608588 |
| 0.680175 | 0.184292 | 0.557172 | 0.461523 |
| 11.57169 | 26.90505 | 24.02274 | 26.72516 |
| 10.77167 | 30.50723 | 33.09757 | 33.06607 |



|          |          |          |          |
|----------|----------|----------|----------|
| 29.76847 | 10.48232 | 10.52409 | 10.36123 |
| 0.89371  | 4.048698 | 4.771702 | 4.53719  |
| 1.48924  | 5.260316 | 4.815306 | 4.635389 |
| 9.336295 | 3.567532 | 3.288605 | 3.369944 |
| 0        | 0.258511 | 0.291281 | 0.097584 |
| 3.064322 | 0.933579 | 1.594531 | 1.266978 |
| 3.091863 | 0.992139 | 1.470502 | 1.046328 |
| 29.52801 | 7.062078 | 7.380292 | 7.067846 |
| 0.887514 | 2.970471 | 2.721435 | 2.851135 |
| 13.01459 | 35.80333 | 34.75496 | 33.76263 |
| 4.781846 | 1.40925  | 0.461951 | 0.725251 |
| 8.471125 | 15.18093 | 14.17023 | 15.4261  |
| 2.712919 | 0.282243 | 0.03657  | 0.076175 |
| 12.96142 | 44.81192 | 46.11104 | 47.52318 |
| 295.4217 | 118.4146 | 118.3234 | 120.7509 |
| 39.79267 | 18.45774 | 18.65567 | 19.19019 |
| 1.135146 | 5.593136 | 6.374487 | 6.758891 |
| 8.222035 | 82.87301 | 77.84935 | 84.42159 |
| 7.141425 | 3.281921 | 2.758032 | 3.352602 |
| 0.242443 | 4.704049 | 6.757501 | 3.424698 |
| 20.77785 | 10.57491 | 9.321512 | 11.41339 |
| 1.312639 | 0.294406 | 0.201922 | 0.282332 |
| 385.9899 | 1228.345 | 1027.17  | 1000.965 |
| 1.565717 | 3.98077  | 3.815476 | 4.051084 |
| 22.22881 | 6.563222 | 8.85473  | 6.661292 |
| 6.426244 | 13.7539  | 14.28253 | 14.27889 |
| 0.317314 | 2.675258 | 2.084872 | 2.979663 |
| 0.131343 | 0.459945 | 0.384673 | 0.555586 |
| 2.181126 | 0.544972 | 0.171742 | 0.208139 |
| 9.125462 | 0.814441 | 0.438078 | 0.483293 |
| 9.682488 | 7.864694 | 8.225376 | 7.559016 |
| 1.417852 | 5.43928  | 4.788455 | 5.620641 |
| 14.3841  | 4.466053 | 5.374313 | 6.264059 |
| 12.08508 | 65.77867 | 61.94874 | 63.47797 |
| 2.88305  | 7.661698 | 7.435065 | 8.308439 |
| 2.622022 | 10.86814 | 10.04384 | 9.717186 |
| 1.273659 | 1.939307 | 2.232083 | 2.144682 |
| 2.445321 | 17.28872 | 16.1114  | 15.33475 |
| 10.42843 | 32.83496 | 32.69339 | 32.4467  |
| 2.197372 | 12.64981 | 13.27836 | 12.7349  |
| 0.52458  | 1.829685 | 1.621451 | 1.294563 |
| 19.31222 | 9.846301 | 9.525741 | 9.029857 |
| 3.053433 | 0.916171 | 0.738352 | 1.095557 |
| 0.883716 | 2.837568 | 4.444805 | 3.904209 |
| 63.66943 | 31.71229 | 28.85697 | 32.13734 |
| 2.059896 | 1.469819 | 1.006249 | 0.903005 |
| 7.580094 | 6.045646 | 5.803156 | 5.735506 |
| 5.176438 | 4.864078 | 5.35627  | 6.545473 |
| 1.135621 | 2.35432  | 2.337646 | 2.37809  |
| 4.046324 | 12.36445 | 11.83926 | 11.68618 |
| 5.62858  | 8.37919  | 8.217849 | 7.832987 |

|          |          |          |          |
|----------|----------|----------|----------|
| 2.450886 | 3.22323  | 3.164517 | 3.528939 |
| 0.823459 | 0.066774 | 0.105357 | 0.069152 |
| 37.24202 | 61.98605 | 56.10271 | 61.17164 |
| 4.010231 | 14.54238 | 11.96214 | 14.65833 |
| 35.71323 | 16.14588 | 16.83819 | 18.07418 |
| 5.091006 | 2.176618 | 2.511951 | 3.282424 |
| 1.79412  | 0.385995 | 0.83756  | 0.853494 |
| 1.580505 | 5.305768 | 7.131387 | 6.165894 |
| 0.370304 | 1.333765 | 1.322792 | 1.196106 |
| 197.3994 | 686.2645 | 681.9791 | 710.9351 |
| 0.607793 | 0.705579 | 0.448042 | 0.613324 |
| 0.942942 | 2.772631 | 2.723829 | 2.765391 |
| 0.343323 | 8.494211 | 6.697369 | 6.246892 |
| 6.482424 | 11.08046 | 12.21062 | 12.4401  |
| 5.844663 | 1.998311 | 3.0672   | 3.52306  |
| 0.651662 | 4.369768 | 3.575421 | 2.906125 |
| 1.778605 | 0.994036 | 0.914595 | 0.731905 |
| 1.352176 | 4.000327 | 3.93581  | 3.856164 |
| 25.21588 | 9.978036 | 11.43762 | 12.62593 |
| 99.56297 | 11.22393 | 10.08299 | 9.991673 |
| 1.036202 | 3.118533 | 2.281429 | 2.633806 |
| 9.753516 | 14.85344 | 16.78519 | 16.83997 |
| 33.08197 | 3.149684 | 3.259098 | 2.259211 |
| 31.40601 | 14.70928 | 14.81354 | 15.33996 |
| 117.3447 | 17.82139 | 21.52296 | 19.66653 |
| 2.668254 | 10.95499 | 10.28627 | 8.926035 |
| 0.229245 | 0.497374 | 0.755766 | 0.776241 |
| 6.399963 | 2.122166 | 1.326369 | 2.341345 |
| 59.28784 | 11.68058 | 9.656381 | 10.38656 |
| 15.36731 | 7.452923 | 6.601626 | 6.466645 |
| 1.877845 | 7.026664 | 8.237023 | 7.902562 |
| 28.00982 | 37.15159 | 36.34551 | 36.46177 |
| 65.50356 | 20.68826 | 25.3417  | 27.28292 |
| 213.7695 | 75.15172 | 75.53236 | 77.73866 |
| 0.642889 | 4.143229 | 4.948612 | 3.766294 |
| 4.630943 | 0.550725 | 0        | 0.322875 |
| 8.549273 | 2.503328 | 2.162187 | 2.82563  |
| 5.791484 | 14.96087 | 13.95046 | 15.47339 |
| 9.377378 | 35.95145 | 32.9562  | 36.31956 |
| 3.216845 | 2.064633 | 2.397712 | 2.643888 |
| 124.5992 | 15.1725  | 15.1587  | 15.62028 |
| 5.775319 | 24.60247 | 21.40348 | 24.50673 |
| 9.616984 | 2.294668 | 3.293351 | 4.207852 |
| 10.83185 | 6.13129  | 5.199169 | 5.609129 |
| 128.9961 | 28.9583  | 31.81781 | 31.43945 |
| 43.767   | 23.58507 | 22.09809 | 20.37723 |
| 0.311112 | 0.853663 | 0.842317 | 1.07586  |
| 8.212954 | 28.82506 | 26.9497  | 26.56944 |
| 11.39396 | 12.69444 | 11.24316 | 12.75073 |
| 2.781176 | 0.243935 | 0.17325  | 0.098058 |
| 94.26868 | 37.43265 | 36.41898 | 39.17481 |

|          |          |          |          |
|----------|----------|----------|----------|
| 46.7872  | 10.22494 | 9.688643 | 10.13817 |
| 134.3817 | 44.36327 | 47.06219 | 48.70887 |
| 0.555136 | 0.744364 | 1.089454 | 1.459016 |
| 10.75022 | 5.024872 | 4.42847  | 4.154367 |
| 1.289319 | 0.756698 | 0.497354 | 0.897793 |
| 28.10821 | 12.92179 | 12.94496 | 12.63461 |
| 1452.365 | 406.6451 | 422.7795 | 424.1106 |
| 1.684788 | 6.597511 | 6.84626  | 7.137598 |
| 0.306261 | 0.577661 | 0.773202 | 0.879274 |
| 11.16769 | 7.015516 | 6.883324 | 7.305387 |
| 0.705645 | 3.04837  | 1.984525 | 2.792059 |
| 0.288826 | 1.475631 | 1.918347 | 1.79549  |
| 30.90718 | 15.83395 | 14.96789 | 14.32807 |
| 1282.162 | 173.5687 | 156.5057 | 178.2672 |
| 0.219882 | 1.48265  | 1.492423 | 2.066925 |
| 1.029943 | 1.054441 | 0.826146 | 0.946629 |
| 119.8584 | 173.636  | 179.8115 | 184.5965 |
| 8.757356 | 21.14996 | 17.90755 | 18.04058 |
| 0.366298 | 1.359799 | 1.550985 | 1.585828 |
| 33.4689  | 8.944835 | 8.216244 | 8.33246  |
| 2.061557 | 14.27545 | 12.26254 | 15.67205 |
| 3.070513 | 2.141343 | 1.810532 | 2.359823 |
| 6.914477 | 17.56931 | 17.06019 | 18.21978 |
| 5.007558 | 16.56716 | 12.67693 | 13.77176 |
| 1.760156 | 7.536136 | 6.028275 | 7.39677  |
| 0.963951 | 1.284551 | 0.991495 | 2.056388 |
| 48.45892 | 26.49682 | 28.28848 | 27.54411 |
| 289.5325 | 74.74555 | 75.45073 | 72.98499 |
| 15.54331 | 8.659034 | 7.574927 | 7.487334 |
| 3.295707 | 12.55605 | 11.92391 | 11.93081 |
| 0.687014 | 1.915522 | 1.978644 | 1.918589 |
| 1.054573 | 3.15087  | 2.373552 | 3.019417 |
| 44.85647 | 15.66347 | 14.51448 | 16.7547  |
| 86.44048 | 46.94023 | 44.92456 | 47.81294 |
| 3.602551 | 4.63565  | 6.039647 | 5.720205 |
| 22.21449 | 10.80332 | 11.43484 | 11.52415 |
| 16.77133 | 4.400673 | 3.936001 | 4.362948 |
| 98.40843 | 46.31559 | 41.99949 | 49.40227 |
| 27.51379 | 10.12833 | 9.184241 | 10.60098 |
| 28.2631  | 61.79627 | 65.86562 | 71.84755 |
| 111.3619 | 46.55998 | 45.76001 | 49.76417 |
| 61.52931 | 9.23819  | 10.21089 | 9.851645 |
| 10.32298 | 30.90879 | 29.26222 | 31.17005 |
| 0.327181 | 1.205317 | 1.511123 | 0.954992 |
| 6.526803 | 13.28457 | 12.98706 | 12.74574 |
| 7.647353 | 18.58691 | 17.1907  | 18.47603 |
| 80.93246 | 31.14809 | 33.38257 | 33.81474 |
| 0.140827 | 1.531261 | 1.753047 | 1.395581 |
| 5.66016  | 1.744231 | 1.58693  | 1.709509 |
| 8.248566 | 12.43203 | 12.90691 | 13.56564 |
| 6.803476 | 20.61279 | 19.37255 | 17.29482 |

|          |          |          |          |
|----------|----------|----------|----------|
| 26.20218 | 12.02621 | 12.40195 | 12.95237 |
| 20.44626 | 4.803158 | 3.963832 | 4.318411 |
| 0.35086  | 1.328251 | 3.026731 | 0.975999 |
| 12.39573 | 3.141274 | 3.075263 | 1.91797  |
| 23.89287 | 10.7579  | 10.90958 | 12.25629 |
| 4.050393 | 7.765146 | 7.580326 | 8.58755  |
| 18.17707 | 5.752747 | 5.651326 | 6.017782 |
| 0.57622  | 3.906665 | 4.66678  | 3.297252 |
| 4.404252 | 0.132341 | 0.1325   | 0.049533 |
| 5.47559  | 0.901277 | 0.853227 | 1.926919 |
| 13.83101 | 17.8543  | 15.51207 | 15.19541 |
| 0.148813 | 4.801806 | 3.158138 | 3.206199 |
| 0.447424 | 1.089512 | 0.667066 | 0.793215 |
| 0.108283 | 2.294857 | 1.681106 | 2.254061 |
| 7.223571 | 1.932605 | 2.324849 | 3.534519 |
| 1744.97  | 418.5338 | 415.42   | 429.2775 |
| 4.336708 | 2.278828 | 2.252535 | 1.4995   |
| 2.643053 | 3.297028 | 4.158135 | 3.127032 |
| 2.957323 | 10.53508 | 10.83232 | 12.15778 |
| 4.017006 | 13.06235 | 14.05768 | 14.86049 |
| 6.290234 | 14.87698 | 12.6859  | 15.18341 |
| 6.117746 | 12.45059 | 10.62933 | 10.36134 |
| 5.552221 | 1.724058 | 2.795456 | 1.340855 |
| 1.113134 | 0.160935 | 0.526736 | 0.410569 |
| 1.29552  | 3.494212 | 3.941643 | 3.219585 |
| 8.428252 | 1.219352 | 0.801079 | 0.566641 |
| 11.84423 | 5.035116 | 5.063008 | 5.454309 |
| 22.49274 | 26.58654 | 32.35889 | 32.68166 |
| 53.783   | 11.48097 | 8.991823 | 9.065348 |
| 19.03828 | 8.607274 | 8.726875 | 11.13783 |
| 27.8234  | 12.64362 | 14.19576 | 13.45296 |
| 15.0232  | 5.966846 | 7.12897  | 7.564982 |
| 26.93873 | 12.31523 | 12.92471 | 13.55883 |
| 36.83156 | 7.687615 | 7.913734 | 8.054827 |
| 0.526281 | 0.92761  | 0.792294 | 1.04357  |
| 8.25487  | 15.46849 | 17.3668  | 18.82218 |
| 25.01581 | 24.00507 | 28.88254 | 26.0319  |
| 7.323192 | 18.83624 | 18.65638 | 16.99397 |
| 0.995396 | 0.315685 | 0.239113 | 0.237206 |
| 0.04203  | 1.056884 | 1.342357 | 0.900614 |
| 0.709956 | 0.873931 | 0.404792 | 0.809492 |
| 6.790598 | 15.1929  | 14.93125 | 14.74147 |
| 6.972275 | 1.254721 | 2.153371 | 2.469733 |
| 6.540812 | 19.85956 | 20.47783 | 18.93798 |
| 4.209358 | 9.27142  | 10.71929 | 10.00486 |
| 5.187015 | 0.439979 | 0.602085 | 0.557766 |
| 7.252312 | 24.58497 | 23.76244 | 25.00518 |
| 0.507365 | 1.085894 | 1.207155 | 0.973269 |
| 82.63313 | 26.82058 | 29.82269 | 30.15926 |
| 0.89403  | 1.509258 | 1.807978 | 1.557022 |
| 26.88672 | 7.965049 | 8.69202  | 10.70235 |

|          |          |          |          |
|----------|----------|----------|----------|
| 23.55166 | 15.45961 | 16.83768 | 16.83328 |
| 17.36605 | 35.51516 | 36.51252 | 36.98829 |
| 0        | 0.45116  | 0.336897 | 0.317731 |
| 1.556171 | 1.921073 | 1.874231 | 1.725974 |
| 1.410434 | 1.869011 | 1.873947 | 1.82672  |
| 0.711433 | 2.813365 | 2.360107 | 2.292537 |
| 1.405608 | 1.598903 | 1.596125 | 1.678332 |
| 0.224523 | 1.306164 | 1.711071 | 1.482733 |
| 17.40203 | 8.297386 | 8.014173 | 9.79431  |
| 4.488234 | 2.287121 | 1.927231 | 1.493386 |
| 0.043906 | 0.20173  | 0.176776 | 0.520332 |
| 0.167703 | 4.375414 | 3.501312 | 3.21648  |
| 2.065254 | 0.783551 | 1.245883 | 1.449862 |
| 32.39141 | 4.882351 | 4.324781 | 4.908433 |
| 12.56641 | 3.141135 | 3.965368 | 3.512174 |
| 0.602974 | 180.6512 | 182.9439 | 179.0385 |
| 33.60692 | 6.117932 | 6.616679 | 5.651597 |
| 0.698301 | 4.079246 | 5.704478 | 5.523881 |
| 3.101043 | 0.924651 | 0.63302  | 0.51193  |
| 273.1087 | 64.92894 | 74.61959 | 66.55573 |
| 36.41908 | 12.57355 | 12.32157 | 11.9729  |
| 1.748238 | 3.382066 | 3.179198 | 3.733322 |
| 8.267056 | 47.44112 | 43.8851  | 47.5016  |
| 1.225929 | 2.832847 | 2.404221 | 2.147575 |
| 289.442  | 89.93224 | 87.87169 | 92.55901 |
| 10.66864 | 3.473722 | 4.515691 | 3.557308 |
| 0.536132 | 0.084089 | 0.180554 | 0.127557 |
| 27.88768 | 10.61868 | 10.3175  | 12.62968 |
| 0.945143 | 1.794834 | 1.157856 | 1.778987 |
| 87.17762 | 26.7984  | 28.13826 | 28.2524  |
| 0.591428 | 0.080934 | 0.064771 | 0.232952 |
| 21.0831  | 22.42043 | 21.26923 | 21.97085 |
| 0.727953 | 1.162333 | 1.681335 | 1.349428 |
| 2.851697 | 4.5335   | 4.800916 | 4.235256 |
| 17.14828 | 12.93764 | 10.81202 | 10.58586 |
| 14.17665 | 5.624105 | 4.042326 | 5.339319 |
| 11.1094  | 31.13739 | 27.08259 | 28.90302 |
| 583.5586 | 162.0684 | 160.9016 | 168.3392 |
| 0.838754 | 0.211054 | 0.503849 | 0.790212 |
| 309.7481 | 115.8508 | 114.2049 | 113.8059 |
| 4.254897 | 12.16141 | 9.96599  | 12.34748 |
| 1.227772 | 0.349285 | 0.630602 | 0.15145  |
| 1.406209 | 0.747548 | 0.669321 | 0.977426 |
| 15.24305 | 75.88751 | 73.05087 | 81.46531 |
| 11.68152 | 33.12383 | 30.23086 | 34.58625 |
| 17.66663 | 14.32629 | 15.49953 | 14.80009 |
| 0.435675 | 21.58054 | 21.53653 | 22.52046 |
| 1.367793 | 0.590801 | 0.695326 | 0.748383 |
| 8.263727 | 3.782801 | 4.149994 | 4.006113 |
| 1.986121 | 10.68306 | 9.665125 | 9.087141 |
| 9.467199 | 2.317949 | 2.345206 | 3.051857 |

|          |          |          |          |
|----------|----------|----------|----------|
| 7.017924 | 5.877003 | 5.425001 | 5.127559 |
| 0.184926 | 7.82258  | 7.884282 | 8.499664 |
| 87.89843 | 34.90045 | 40.19694 | 41.34774 |
| 5.151673 | 1.316021 | 2.472378 | 2.675139 |
| 0.788756 | 0.515945 | 0.308017 | 0.493396 |
| 4.058946 | 2.204239 | 1.43561  | 2.461167 |
| 41.319   | 15.58206 | 14.92918 | 14.8534  |
| 4.106621 | 10.07492 | 10.84781 | 11.52815 |
| 29.98198 | 50.87875 | 48.39828 | 52.28693 |
| 0.278398 | 1.173054 | 0.83815  | 1.187189 |
| 2.334263 | 1.446857 | 1.28517  | 1.56634  |
| 23.2746  | 53.981   | 53.87027 | 57.56623 |
| 14.45921 | 3.582805 | 4.255874 | 4.710003 |
| 45.77025 | 240.5875 | 233.3361 | 244.2101 |
| 16.08221 | 4.212479 | 3.866022 | 3.475766 |
| 25.03631 | 83.65834 | 80.66863 | 82.5621  |
| 1.090157 | 3.84575  | 3.653234 | 3.98281  |
| 50.34064 | 10.80769 | 10.94192 | 11.671   |
| 0.955927 | 2.130857 | 2.311429 | 2.523403 |
| 2.49659  | 1.249378 | 0.88543  | 0.923937 |
| 37.12779 | 13.61727 | 14.044   | 13.1293  |
| 7.363604 | 5.041888 | 3.934894 | 4.436336 |
| 12.07096 | 15.59901 | 14.44423 | 16.48944 |
| 4.247697 | 15.53211 | 15.64055 | 12.534   |
| 1.445539 | 5.658809 | 4.206677 | 5.314189 |
| 1.827576 | 0.956964 | 0.575596 | 0.750805 |
| 5.55606  | 6.264887 | 7.159118 | 5.457363 |
| 278.7279 | 77.99165 | 77.26241 | 78.79498 |
| 6.715117 | 2.944712 | 3.252253 | 3.667994 |
| 2.47819  | 1.391259 | 1.683979 | 1.986349 |
| 3.784365 | 10.40847 | 10.17229 | 13.2559  |
| 46.64185 | 47.88027 | 43.97571 | 44.5237  |
| 0        | 0.583896 | 0.449774 | 0.325844 |
| 7.333434 | 3.185492 | 3.087024 | 3.243341 |
| 9.752554 | 3.222078 | 3.081551 | 2.948671 |
| 6.382893 | 1.876797 | 3.357072 | 3.837035 |
| 0.033692 | 0.179639 | 0.216016 | 0.274343 |
| 0.198408 | 3.036913 | 3.221597 | 3.240881 |
| 0.552646 | 0.199267 | 0.299595 | 0.277734 |
| 26.988   | 10.9165  | 9.999967 | 10.3033  |
| 4.634703 | 1.639614 | 1.39009  | 1.654866 |
| 0        | 0.234394 | 0.805009 | 0.263232 |
| 1.001527 | 0.261696 | 0.410632 | 0.813016 |
| 56.69667 | 73.15115 | 72.42769 | 75.05553 |
| 66.50062 | 30.40404 | 24.03569 | 24.69165 |
| 6.78071  | 1.634617 | 2.405751 | 2.339689 |
| 4.320736 | 2.247937 | 1.448664 | 1.256247 |
| 801.6876 | 273.6427 | 267.9495 | 276.0609 |
| 25.86391 | 44.99476 | 51.32744 | 53.41548 |
| 34.96744 | 13.93352 | 14.2066  | 15.403   |
| 7.844911 | 0.572334 | 0.531851 | 0.92658  |

|          |          |          |          |
|----------|----------|----------|----------|
| 79.71618 | 232.3706 | 254.9521 | 247.4783 |
| 2.100851 | 7.31164  | 8.032834 | 7.711128 |
| 2.84906  | 3.315298 | 3.430921 | 3.303022 |
| 1.589879 | 2.784141 | 3.417332 | 3.78029  |
| 0.807558 | 13.40805 | 10.92681 | 13.09609 |
| 1.066366 | 1.747846 | 1.608423 | 1.720235 |
| 13.01442 | 55.75985 | 57.24668 | 54.78802 |
| 3.703876 | 7.30481  | 6.776888 | 7.53608  |
| 8.343039 | 37.57713 | 36.28703 | 35.74364 |
| 5.641659 | 2.390633 | 1.498419 | 2.015747 |
| 8.132102 | 16.6565  | 17.05797 | 16.89172 |
| 2.393997 | 2.437516 | 2.686066 | 2.425516 |
| 25.09191 | 56.95029 | 55.25667 | 59.54911 |
| 8.642957 | 19.99247 | 19.35609 | 20.02607 |
| 9.126093 | 3.009704 | 3.528319 | 3.303128 |
| 0.681246 | 3.092372 | 3.165129 | 4.915468 |
| 0.595823 | 2.106503 | 2.94626  | 3.242341 |
| 12.31881 | 5.811119 | 5.995081 | 6.554454 |
| 26.98142 | 12.63797 | 13.38525 | 13.17298 |
| 24.01071 | 10.93164 | 8.715145 | 9.198792 |
| 6.270636 | 2.064002 | 1.051648 | 2.302027 |
| 210.2849 | 56.63431 | 56.07251 | 52.96502 |
| 1.761705 | 1.711145 | 1.19861  | 0.993004 |
| 0.714118 | 2.762854 | 2.943821 | 2.151576 |
| 1.869168 | 5.682553 | 5.482517 | 4.18895  |
| 2.619022 | 2.085196 | 2.680378 | 1.77567  |
| 8.682788 | 20.28559 | 21.59833 | 23.12563 |
| 41.80071 | 19.121   | 16.69434 | 19.75554 |
| 50.61979 | 23.6688  | 23.13689 | 23.96339 |
| 19.62302 | 72.25903 | 70.80385 | 71.29049 |
| 12.71881 | 19.93267 | 19.17623 | 19.30442 |
| 62.69013 | 23.38591 | 26.00181 | 24.66672 |
| 2.456252 | 4.538961 | 4.729863 | 4.500867 |
| 25.01648 | 12.16513 | 13.95595 | 12.77334 |
| 2.214636 | 1.732835 | 1.724723 | 1.974276 |
| 1.662727 | 7.713372 | 7.000839 | 7.085501 |
| 53.36704 | 121.7361 | 117.2883 | 123.8696 |
| 4.197699 | 3.869647 | 2.794736 | 2.732503 |
| 7.755222 | 4.186925 | 3.043175 | 3.629371 |
| 0.684465 | 2.075139 | 1.742733 | 1.416272 |
| 54.6204  | 20.7461  | 18.09675 | 18.88199 |
| 1.676046 | 0.639226 | 0.67772  | 0.566915 |
| 13.99255 | 6.754142 | 6.891142 | 7.420036 |
| 5.816184 | 1.305064 | 0.992359 | 1.187922 |
| 49.82211 | 23.47637 | 22.13804 | 23.56056 |
| 9.44434  | 3.269169 | 3.246831 | 3.979881 |
| 0.520464 | 18.77498 | 17.7382  | 18.01031 |
| 0.18598  | 0.658115 | 0.630232 | 0.507618 |
| 1.335168 | 3.334441 | 3.480739 | 3.764691 |
| 23.80678 | 36.58504 | 37.12183 | 38.79927 |
| 4.924812 | 2.838475 | 2.616848 | 2.611416 |

|          |          |          |          |
|----------|----------|----------|----------|
| 0.972012 | 11.99662 | 8.329817 | 11.07826 |
| 15.12341 | 4.532893 | 5.075409 | 3.860958 |
| 788.4718 | 239.9886 | 227.5476 | 240.3817 |
| 22.33314 | 4.400705 | 4.728449 | 4.389657 |
| 26.46243 | 11.44619 | 10.18826 | 11.8789  |
| 3.796432 | 12.13844 | 11.5186  | 12.72737 |
| 73.55144 | 393.9211 | 412.0583 | 412.9198 |
| 9.264987 | 10.09334 | 9.319781 | 9.282484 |
| 0.758428 | 1.206908 | 1.305634 | 0.874425 |
| 2.139278 | 3.342744 | 3.123506 | 3.770341 |
| 8.571987 | 18.20234 | 18.15916 | 18.83039 |
| 0.181432 | 1.119454 | 1.231959 | 0.746888 |
| 3.580367 | 0.467814 | 0.488278 | 0.715574 |
| 3.90012  | 4.593046 | 6.208836 | 4.504789 |
| 3.179904 | 14.03749 | 12.58866 | 15.2746  |
| 5.63718  | 14.99068 | 17.27003 | 15.4137  |
| 248.4216 | 77.53534 | 75.59476 | 78.12057 |
| 0.978947 | 3.251915 | 3.394854 | 3.041844 |
| 0.629181 | 2.197434 | 2.253259 | 2.447103 |
| 99.56187 | 14.15684 | 15.3101  | 16.43978 |
| 0.67285  | 1.26649  | 1.452399 | 1.352369 |
| 1.780484 | 3.745416 | 4.572126 | 4.40976  |
| 8.609571 | 12.2229  | 12.31022 | 10.48255 |
| 283.8803 | 120.4087 | 128.3691 | 132.3507 |
| 12.96795 | 6.198835 | 5.634512 | 6.173534 |
| 10.52207 | 20.82914 | 19.03072 | 19.61104 |
| 0.446189 | 1.509669 | 1.747876 | 1.176614 |
| 6.869508 | 2.976249 | 4.066443 | 2.043359 |
| 4.959892 | 2.813971 | 2.931682 | 3.276909 |
| 40.60127 | 192.8553 | 161.3701 | 178.36   |
| 69.80227 | 100.4513 | 96.53249 | 94.45065 |
| 0.807841 | 2.675405 | 2.388988 | 2.22729  |
| 21.10153 | 7.500196 | 6.346993 | 7.949419 |
| 11.50544 | 3.307443 | 4.77864  | 4.092193 |
| 42.38664 | 20.8925  | 19.40696 | 20.64917 |
| 1.026274 | 2.211774 | 5.267853 | 1.813558 |
| 52.92728 | 8.885819 | 10.20747 | 8.134052 |
| 0.52228  | 0.884427 | 0.765909 | 0.45831  |
| 25.74793 | 11.24947 | 10.14439 | 10.59615 |
| 103.1195 | 40.0644  | 39.43279 | 40.70503 |
| 0.225736 | 1.138582 | 0.888909 | 0.945986 |
| 1.304391 | 5.252314 | 5.62471  | 5.804598 |
| 0.479946 | 0.062434 | 0.20373  | 0.129669 |
| 101.5642 | 31.02271 | 31.25591 | 30.75277 |
| 0.654991 | 2.696449 | 2.69562  | 2.625952 |
| 5.231422 | 2.9858   | 2.470103 | 3.003393 |
| 188.9991 | 27.84849 | 23.47799 | 30.22612 |
| 10.0872  | 18.70035 | 17.91005 | 17.8125  |
| 13.93874 | 44.7306  | 45.37778 | 45.33334 |
| 1.937178 | 3.287074 | 3.626484 | 3.534061 |
| 2.011364 | 6.318988 | 4.966197 | 6.422752 |



|          |          |          |          |
|----------|----------|----------|----------|
| 0.583299 | 2.592716 | 2.087361 | 2.872689 |
| 6.257079 | 1.099491 | 0.773591 | 1.382039 |
| 16.33554 | 41.15841 | 39.75454 | 39.38203 |
| 5.861183 | 2.303336 | 1.922341 | 2.270601 |
| 1.045266 | 3.759898 | 3.887538 | 3.40192  |
| 1.902964 | 6.565575 | 8.951073 | 6.899461 |
| 47.91413 | 25.06021 | 20.78693 | 21.84047 |
| 7.092371 | 3.59916  | 3.813788 | 3.770786 |
| 24.59143 | 27.37319 | 25.31919 | 26.98207 |
| 1.663688 | 3.591697 | 3.505972 | 4.120186 |
| 1820.251 | 96.4475  | 89.30788 | 92.77987 |
| 137.3135 | 49.20506 | 52.1856  | 54.82178 |
| 50.7633  | 32.36652 | 25.98863 | 26.70701 |
| 3.882654 | 12.42837 | 9.661597 | 10.85214 |
| 3.223001 | 7.514958 | 9.141812 | 8.519951 |
| 4.581872 | 33.95108 | 30.78347 | 30.99139 |
| 45.37288 | 22.04624 | 20.17885 | 20.76622 |
| 39.09186 | 15.13616 | 13.21127 | 13.83227 |
| 4.098765 | 2.301112 | 1.963267 | 2.495755 |
| 19.15031 | 3.716232 | 2.372669 | 3.753808 |
| 517.8465 | 2042.69  | 1875.615 | 2006.536 |
| 139.8926 | 35.48822 | 39.59021 | 35.52191 |
| 4.816859 | 1.49981  | 1.480753 | 1.366181 |
| 6.118931 | 3.202034 | 3.545727 | 3.418159 |
| 2.910965 | 1.262549 | 1.602104 | 1.504806 |
| 15.5752  | 6.298428 | 6.60313  | 7.811429 |
| 4.986842 | 8.065222 | 10.3957  | 8.870726 |
| 2.523772 | 5.090245 | 5.357246 | 7.980126 |
| 1.172216 | 0.456086 | 0.397038 | 0.57038  |
| 0.568182 | 1.393688 | 1.239294 | 1.524797 |
| 15.35307 | 9.905579 | 9.015059 | 9.244311 |
| 15.16713 | 45.96332 | 46.65562 | 46.4009  |
| 17.28129 | 6.055186 | 5.559109 | 6.4832   |
| 11.02145 | 47.21132 | 47.91153 | 48.16724 |
| 196.1172 | 69.58903 | 69.5342  | 71.62434 |
| 1.689959 | 1.687815 | 1.894321 | 1.206674 |
| 11.72079 | 3.951469 | 4.507459 | 3.932481 |
| 0.085891 | 0.470156 | 0.596167 | 0.699673 |
| 0.335689 | 0.87058  | 1.034389 | 0.663871 |
| 274.2715 | 127.8866 | 122.765  | 126.8524 |
| 15.67905 | 47.34517 | 49.04673 | 49.74688 |
| 8.480176 | 2.351384 | 4.5787   | 3.722253 |
| 0.748274 | 17.17178 | 17.37603 | 17.64012 |
| 2.429757 | 2.924105 | 4.145586 | 4.620047 |
| 3.210596 | 0.48102  | 0.70052  | 0.643769 |
| 1.330689 | 4.114542 | 3.448446 | 5.332155 |
| 1.831435 | 10.15023 | 8.14908  | 9.761231 |
| 33.8564  | 15.62797 | 15.13434 | 16.3821  |
| 450.463  | 169.6627 | 171.1997 | 177.6218 |
| 0.946808 | 7.986625 | 7.69349  | 9.423811 |
| 7.452267 | 1.28399  | 1.130722 | 1.304453 |

|          |          |          |          |
|----------|----------|----------|----------|
| 1.7586   | 0.435773 | 0.737958 | 0.533041 |
| 0.347206 | 0.04548  | 0.215461 | 0.150835 |
| 14.16407 | 15.64942 | 17.08551 | 17.49393 |
| 104.9044 | 173.5416 | 161.7218 | 167.7193 |
| 3.154194 | 8.417908 | 7.299907 | 9.624866 |
| 99.65934 | 8.277616 | 7.608067 | 6.582171 |
| 4.047968 | 23.48692 | 20.64779 | 23.99555 |
| 0.869512 | 7.166272 | 8.315048 | 8.895733 |
| 17.17546 | 57.78056 | 57.71046 | 57.41308 |
| 188.3363 | 32.32782 | 35.34769 | 33.83296 |
| 3.211481 | 5.295537 | 6.029332 | 5.549885 |
| 0.875366 | 2.822067 | 2.881729 | 3.245459 |
| 257.2472 | 453.4299 | 447.0445 | 461.517  |
| 8.192071 | 5.538092 | 5.748705 | 5.451992 |
| 12.34406 | 5.192993 | 5.628394 | 3.907566 |
| 6.794648 | 25.57872 | 23.63627 | 26.16383 |
| 0.402531 | 1.178958 | 1.447477 | 1.604926 |
| 12.35757 | 6.642713 | 6.684701 | 7.19918  |
| 4.292989 | 11.60572 | 13.43645 | 11.30547 |
| 0.758447 | 0.183986 | 0.343951 | 0.297589 |
| 0.598627 | 0.660221 | 0.391842 | 0.77265  |
| 5.764849 | 14.90684 | 14.3529  | 15.47607 |
| 1.011086 | 1.918465 | 2.395371 | 2.378606 |
| 3.605156 | 2.544398 | 1.656897 | 1.814749 |
| 34.76305 | 12.72475 | 12.70045 | 14.47275 |
| 21.00181 | 25.44809 | 23.57158 | 20.7586  |
| 3.751661 | 6.685212 | 7.080478 | 8.05414  |
| 2.241702 | 0.566487 | 0.379091 | 0.933411 |
| 46.0618  | 24.30985 | 24.23807 | 27.63995 |
| 4.09013  | 1.664355 | 1.634578 | 1.511188 |
| 34.29471 | 17.80002 | 16.11954 | 18.08336 |
| 1.046419 | 5.009063 | 4.694875 | 5.047009 |
| 1.98791  | 11.41566 | 11.64852 | 13.17485 |
| 8.341938 | 3.095614 | 3.560885 | 3.707809 |
| 2.481958 | 4.696563 | 4.747877 | 4.604165 |
| 3.725777 | 1.546682 | 1.718465 | 1.269487 |
| 33.9071  | 120.1521 | 122.9118 | 119.1025 |
| 13.74028 | 61.32159 | 57.66242 | 62.15204 |
| 30.67868 | 1.489278 | 1.499877 | 1.639752 |
| 35.49941 | 10.81816 | 8.650427 | 10.065   |
| 38.91378 | 10.76103 | 9.751403 | 10.47279 |
| 25.23957 | 10.7544  | 11.11242 | 10.84534 |
| 0.626147 | 1.508211 | 0.83463  | 1.283066 |
| 5.528546 | 10.19695 | 10.16701 | 9.985027 |
| 8.244234 | 16.17226 | 16.03655 | 16.95741 |
| 176.1499 | 47.34706 | 46.50671 | 50.41654 |
| 0.026462 | 0.04333  | 0.090682 | 0.101189 |
| 0.382018 | 1.753564 | 1.368974 | 0.987972 |
| 1.212559 | 0.342751 | 0.048264 | 0.190108 |
| 1.171294 | 2.774369 | 3.205783 | 2.746525 |
| 1.948858 | 1.500065 | 1.352375 | 1.230436 |

|          |          |          |          |
|----------|----------|----------|----------|
| 28.24032 | 89.68511 | 89.51319 | 91.80938 |
| 18.78597 | 44.12881 | 41.49728 | 43.73415 |
| 0.312553 | 0.117893 | 0.093592 | 0.238531 |
| 35.46796 | 23.62265 | 21.71008 | 21.42354 |
| 0.681829 | 2.317951 | 2.372488 | 1.393885 |
| 2.11992  | 6.626588 | 7.189378 | 8.053274 |
| 8.528955 | 86.50816 | 80.825   | 84.21295 |
| 0.306206 | 0.53057  | 0.16909  | 0.060176 |
| 1.414934 | 4.54865  | 4.420136 | 4.46683  |
| 280.9153 | 774.6389 | 666.3598 | 747.5411 |
| 12.53291 | 7.40302  | 7.48296  | 8.435293 |
| 46.53014 | 8.032504 | 8.205881 | 8.130941 |
| 30.67089 | 13.98268 | 13.00514 | 13.3293  |
| 13.96236 | 5.807256 | 4.845901 | 6.132475 |
| 2.807672 | 0.748457 | 1.150766 | 0.960098 |
| 18.37991 | 38.26281 | 35.59523 | 40.73569 |
| 3.517039 | 3.1855   | 3.77806  | 3.542697 |
| 0.719264 | 4.576829 | 4.763177 | 4.191912 |
| 15.0567  | 6.771662 | 5.981102 | 5.266383 |
| 11.29891 | 3.21856  | 2.815749 | 3.540854 |
| 19.31174 | 38.94089 | 41.46588 | 38.31048 |
| 35.03016 | 15.07816 | 15.70144 | 16.05882 |
| 12.55326 | 20.95317 | 18.76367 | 21.28294 |
| 24.489   | 10.4574  | 10.74308 | 10.77066 |
| 4.567863 | 9.228725 | 10.45285 | 9.399151 |
| 0.810538 | 3.180443 | 4.866871 | 4.66093  |
| 0        | 0.419921 | 0.350976 | 0.501862 |
| 0.915895 | 87.92607 | 88.28759 | 92.98623 |
| 0.222632 | 2.676104 | 2.339985 | 1.530044 |
| 66.54769 | 35.45062 | 29.46471 | 32.45139 |
| 0.095639 | 2.073595 | 1.564549 | 1.300393 |
| 8.988838 | 4.529943 | 4.273421 | 4.139309 |
| 1.088287 | 2.7584   | 2.014344 | 2.807481 |
| 12.33034 | 3.749071 | 4.372118 | 5.767346 |
| 18.62359 | 71.06113 | 66.2073  | 70.09179 |
| 1.059329 | 4.018584 | 4.240201 | 4.953219 |
| 15.1782  | 46.91052 | 51.59984 | 51.69645 |
| 3.533467 | 4.847019 | 5.539823 | 4.417261 |
| 0.904698 | 0.269027 | 0.226074 | 0.303301 |
| 7.790885 | 15.10596 | 15.61633 | 16.13714 |
| 206.7579 | 92.83119 | 82.22938 | 87.75108 |
| 588.7289 | 250.0857 | 241.9457 | 259.2336 |
| 10.52912 | 1.73236  | 1.751512 | 1.796993 |
| 32.66278 | 15.22746 | 16.7142  | 15.21558 |
| 12.94986 | 30.26951 | 30.15885 | 29.79878 |
| 58.60205 | 9.840338 | 9.417742 | 11.10237 |
| 70.5574  | 18.60265 | 22.30053 | 20.71853 |
| 0.351151 | 1.273276 | 0.776816 | 1.064159 |
| 1.944743 | 6.194089 | 8.542829 | 8.138442 |
| 1.801021 | 4.471252 | 4.536092 | 3.859022 |
| 25.36373 | 4.632295 | 5.803951 | 5.364969 |

|          |          |          |          |
|----------|----------|----------|----------|
| 0.411286 | 0.847986 | 0.749078 | 1.579651 |
| 127.5387 | 391.2593 | 380.3701 | 409.2015 |
| 3.461249 | 1.919639 | 1.415958 | 2.253943 |
| 0.721465 | 0.434478 | 0.242601 | 0.905655 |
| 0        | 0        | 0        | 0        |
| 4.045966 | 16.17712 | 17.18445 | 18.71826 |
| 18.19949 | 8.4189   | 7.421791 | 8.409386 |
| 4.526905 | 2.270248 | 1.863289 | 2.558396 |
| 1.665565 | 0.593019 | 0.312051 | 0.546878 |
| 2.145715 | 0.134207 | 0.82073  | 0.419507 |
| 1.801347 | 0.644753 | 0.580729 | 0.271942 |
| 9.377051 | 50.82695 | 50.2098  | 53.48256 |
| 2.61165  | 3.155819 | 3.553993 | 2.931563 |
| 2.551885 | 0.899457 | 1.079704 | 1.202766 |
| 749.3128 | 20.51126 | 20.40527 | 20.22559 |
| 49.31124 | 23.22715 | 22.42317 | 24.46954 |
| 115.8084 | 57.52513 | 54.30945 | 59.14178 |
| 7.153037 | 4.062212 | 5.182955 | 4.772712 |
| 0.778381 | 15.41348 | 16.13099 | 15.11011 |
| 3.335969 | 22.96719 | 23.56748 | 23.93097 |
| 1.557972 | 0.87369  | 0.470758 | 0.960548 |
| 1.504822 | 5.575098 | 6.180055 | 5.929566 |
| 0.525469 | 2.832817 | 2.367143 | 2.210587 |
| 4.110237 | 1.859592 | 2.5296   | 2.429664 |
| 0.382079 | 1.3476   | 1.349139 | 1.597432 |
| 0.106367 | 0.208387 | 0.261325 | 0.287363 |
| 1.407888 | 3.11116  | 2.789722 | 4.245758 |
| 17.80535 | 17.36928 | 14.9305  | 16.98275 |
| 0.417872 | 0.794911 | 0.924195 | 1.583499 |
| 0        | 2.707684 | 2.221051 | 2.749467 |
| 0.876719 | 1.362812 | 0.863465 | 0.926794 |
| 20.90486 | 27.44357 | 23.68817 | 26.20079 |
| 9.802782 | 2.795719 | 1.978562 | 2.855662 |
| 0.733423 | 2.672728 | 2.926448 | 2.572024 |
| 2.957963 | 0.195672 | 0.937474 | 0.229646 |
| 10.04764 | 6.100833 | 6.475269 | 8.006711 |
| 38.79531 | 120.6346 | 122.7739 | 135.6526 |
| 6.820478 | 7.219454 | 6.433427 | 7.961753 |
| 1.187368 | 3.232301 | 2.490471 | 3.020571 |
| 6.756501 | 19.47457 | 21.57483 | 17.71513 |
| 48.16437 | 209.7017 | 200.1238 | 207.0011 |
| 1.066746 | 1.86777  | 1.933797 | 1.984012 |
| 20.8663  | 23.21784 | 23.54122 | 23.66405 |
| 7.087382 | 0.763986 | 0.84433  | 0.854064 |
| 1.144301 | 0.536483 | 0.431619 | 0.335909 |
| 0        | 5.769317 | 4.676167 | 5.770283 |
| 1.228181 | 0.245756 | 0.224986 | 0.253097 |
| 7.300998 | 32.41283 | 28.08113 | 30.5226  |
| 6.167049 | 3.645036 | 3.532387 | 3.082259 |
| 0.228713 | 0.788369 | 0.504151 | 0.569433 |
| 15.70048 | 5.090578 | 4.162956 | 4.193015 |

|          |          |          |          |
|----------|----------|----------|----------|
| 1.650436 | 6.469893 | 5.406047 | 4.517854 |
| 26.63786 | 35.21712 | 36.18682 | 39.0706  |
| 0.63857  | 0.478229 | 0.752185 | 0.783732 |
| 11.36424 | 3.657985 | 3.11537  | 4.432539 |
| 4.075745 | 8.26778  | 8.302394 | 9.153956 |
| 9.554181 | 0.214586 | 0.233236 | 0.186515 |
| 32.62992 | 28.94486 | 30.38693 | 28.22059 |
| 24.48753 | 23.64806 | 19.83004 | 26.64794 |
| 11.12207 | 28.8363  | 26.46325 | 29.17929 |
| 19.6336  | 50.89406 | 49.21275 | 51.55579 |
| 0.435656 | 1.075445 | 0.879583 | 1.168423 |
| 23.43935 | 4.763442 | 4.46204  | 4.634673 |
| 730.3404 | 333.3915 | 326.4988 | 338.4956 |
| 42.91422 | 117.324  | 109.2595 | 112.3612 |
| 1.197568 | 11.19174 | 10.689   | 10.44688 |
| 15.72788 | 5.312299 | 3.970391 | 4.118187 |
| 55.87048 | 23.45355 | 20.99707 | 23.29811 |
| 0.437978 | 1.200024 | 1.234257 | 1.591715 |
| 0.473714 | 0.875504 | 0.985122 | 0.71083  |
| 16.00475 | 6.770137 | 6.965102 | 7.213441 |
| 0.255167 | 0.781126 | 0.713722 | 0.86006  |
| 0.329671 | 2.567761 | 3.020011 | 2.31077  |
| 144.9233 | 62.1732  | 62.54456 | 68.36724 |
| 8.172684 | 14.91126 | 12.28083 | 12.58864 |
| 2.521369 | 14.68472 | 12.32172 | 14.14771 |
| 1.816064 | 1.305032 | 0.95322  | 0.724082 |
| 1.996902 | 7.946991 | 7.128064 | 5.939431 |
| 1.555135 | 21.29796 | 16.38526 | 15.06719 |
| 14.27315 | 0.380659 | 0.508917 | 0.241953 |
| 0.500431 | 1.383751 | 1.165096 | 0.862439 |
| 2.601912 | 4.794198 | 4.689597 | 4.626918 |
| 4.261724 | 10.5944  | 10.72117 | 10.50363 |
| 3.065006 | 6.610024 | 4.848521 | 6.733886 |
| 6.017742 | 3.272002 | 2.861127 | 3.307008 |
| 4.930331 | 1.603198 | 1.693157 | 1.700182 |
| 0.06787  | 0.503037 | 0.135458 | 0.211399 |
| 3.916349 | 3.045978 | 1.799584 | 1.723612 |
| 12.61057 | 27.27433 | 27.06558 | 26.0475  |
| 58.83104 | 188.9367 | 183.4199 | 202.5021 |
| 363.8907 | 128.3017 | 132.7442 | 134.5662 |
| 4.098421 | 3.923121 | 4.250137 | 4.972048 |
| 2.250671 | 2.745063 | 1.768896 | 3.113269 |
| 12.80885 | 1.426318 | 1.733098 | 1.649981 |
| 4.175316 | 2.098284 | 2.81916  | 2.382486 |
| 2.947209 | 8.799603 | 8.325119 | 9.235606 |
| 0.917892 | 4.478612 | 3.981034 | 4.145337 |
| 1.425471 | 12.53416 | 12.37168 | 13.50463 |
| 2.156269 | 2.225238 | 2.706156 | 2.298837 |
| 1.729454 | 23.19694 | 24.22401 | 23.90127 |
| 2.544297 | 7.030405 | 8.830202 | 7.864549 |
| 22.04573 | 5.237132 | 4.667047 | 3.630455 |

|          |          |          |          |
|----------|----------|----------|----------|
| 4.290836 | 2.64802  | 3.099736 | 2.543369 |
| 0.392419 | 2.25244  | 2.651475 | 1.932613 |
| 4.886688 | 1.992529 | 2.247783 | 1.435819 |
| 68.44054 | 31.22417 | 31.5716  | 29.7393  |
| 84.44521 | 24.74371 | 25.82418 | 24.38779 |
| 21.22874 | 7.629166 | 8.896299 | 7.264215 |
| 18.42792 | 49.09643 | 52.46651 | 53.81132 |
| 0.696407 | 5.477526 | 5.600633 | 6.257584 |
| 4.511804 | 7.915409 | 6.175051 | 4.764751 |
| 363.3398 | 176.0078 | 167.295  | 184.0361 |
| 0.423406 | 2.078263 | 3.683307 | 4.138991 |
| 38.44808 | 15.21244 | 14.98256 | 15.68199 |
| 9.072172 | 4.838836 | 3.847526 | 5.151292 |
| 4.602645 | 0.683072 | 0.326605 | 0.617365 |
| 20.07118 | 54.60296 | 46.53697 | 53.33276 |
| 1.690992 | 2.644237 | 2.925827 | 3.221757 |
| 0.765308 | 2.878286 | 2.127898 | 3.275628 |
| 114.4989 | 1.953855 | 2.137221 | 1.575631 |
| 3.469522 | 0.619383 | 0.641236 | 0.417785 |
| 37.56237 | 0.578608 | 0.656501 | 1.295623 |
| 378.8405 | 145.298  | 109.738  | 121.4633 |
| 0.327209 | 2.36504  | 2.217557 | 2.328022 |
| 6.056139 | 1.943161 | 2.401105 | 2.527141 |
| 0.740967 | 2.901903 | 2.377794 | 2.636761 |
| 2.330594 | 3.206425 | 3.159143 | 3.284627 |
| 8.908736 | 24.34861 | 23.2469  | 23.54561 |
| 9.909955 | 3.086271 | 4.605565 | 4.457611 |
| 25.53729 | 11.21487 | 11.25096 | 11.66425 |
| 39.76875 | 26.13855 | 26.88987 | 29.76876 |
| 0.683603 | 1.223713 | 1.767832 | 1.629511 |
| 9.003928 | 40.31197 | 37.91993 | 41.91636 |
| 10.33019 | 5.577827 | 5.197052 | 5.05244  |
| 1.297347 | 1.025926 | 1.347794 | 0.738022 |
| 0.479237 | 0.81104  | 1.226944 | 1.722613 |
| 8.439967 | 23.94941 | 22.46823 | 22.08517 |
| 1.444807 | 3.795183 | 4.077661 | 4.409829 |
| 21.92384 | 9.996147 | 10.5201  | 11.64187 |
| 6.946115 | 3.4237   | 3.107271 | 2.97104  |
| 8.846568 | 3.771059 | 3.864875 | 3.566178 |
| 91.23023 | 39.36628 | 40.22697 | 40.2617  |
| 161.0519 | 58.53532 | 62.67794 | 60.85685 |
| 14.74417 | 6.626495 | 5.333323 | 6.764244 |
| 1.59396  | 0.778289 | 0.579162 | 0.434896 |
| 113.9885 | 30.5184  | 32.7969  | 32.62459 |
| 3.327589 | 2.022431 | 1.443453 | 1.135384 |
| 2.948765 | 11.05038 | 10.39458 | 10.71839 |
| 2.038342 | 0        | 0.0594   | 0        |
| 0.372926 | 0.414472 | 0.338477 | 0.979355 |
| 17.4765  | 35.90511 | 39.68943 | 40.04119 |
| 211.6693 | 26.39904 | 25.65215 | 27.90033 |
| 13.78614 | 5.225548 | 5.420353 | 4.911483 |

|          |          |          |          |
|----------|----------|----------|----------|
| 0.25962  | 0.782084 | 0.672305 | 0.712301 |
| 2.505909 | 0.460722 | 0.647044 | 0.385129 |
| 674.6118 | 237.826  | 235.9442 | 247.0604 |
| 1.70131  | 0.909458 | 0.753216 | 0.859764 |
| 18.71615 | 8.274114 | 8.15774  | 9.265473 |
| 11.50435 | 34.09365 | 30.35544 | 30.32957 |
| 11.17279 | 2.822926 | 2.622195 | 3.526535 |
| 2.740606 | 13.47833 | 13.66481 | 13.99628 |
| 92.4079  | 46.32375 | 45.0161  | 42.50695 |
| 75.18717 | 36.72451 | 33.70946 | 39.23485 |
| 0.975251 | 0.894487 | 1.363076 | 1.345582 |
| 17.81768 | 8.243872 | 8.033865 | 6.910663 |
| 28.89376 | 15.23007 | 13.6552  | 13.44545 |
| 24.0329  | 8.663056 | 8.995164 | 9.58474  |
| 11.79755 | 4.432894 | 4.077518 | 3.761815 |
| 0.646598 | 0.245772 | 0.130581 | 0.146887 |
| 61.18644 | 169.2667 | 160.3821 | 172.6517 |
| 0.090401 | 2.996729 | 2.683902 | 2.641073 |
| 1.230776 | 8.793332 | 7.644209 | 7.053402 |
| 1.449234 | 0.585146 | 0.789387 | 1.155207 |
| 1.524156 | 0.902281 | 0.445217 | 0.568834 |
| 7.656144 | 2.639059 | 3.072575 | 2.783166 |
| 57.86934 | 18.0677  | 18.45038 | 18.22193 |
| 7.063982 | 18.35455 | 16.95083 | 16.39097 |
| 8.482626 | 4.345842 | 3.679447 | 4.087057 |
| 9.167468 | 25.69049 | 26.09941 | 25.22648 |
| 34.38392 | 13.21877 | 13.27618 | 12.74704 |
| 0.860657 | 0.155179 | 0.765702 | 0.760674 |
| 120.6626 | 547.1573 | 523.0721 | 558.8496 |
| 0.646941 | 0.875148 | 0.762775 | 0.829759 |
| 11.79869 | 32.90502 | 31.28044 | 33.11345 |
| 19.47526 | 4.965388 | 5.180037 | 4.620234 |
| 54.39615 | 22.49957 | 22.6538  | 23.39966 |
| 1753.333 | 524.4544 | 522.3638 | 546.7659 |
| 15.83458 | 6.645195 | 5.624865 | 6.432621 |
| 73.627   | 207.369  | 209.5435 | 219.8018 |
| 48.07912 | 80.92954 | 81.70589 | 81.85441 |
| 1.710424 | 0.932598 | 1.263466 | 1.11121  |
| 0.376451 | 2.176567 | 2.07924  | 2.143554 |
| 0.873324 | 4.62852  | 4.717202 | 4.73438  |
| 7.214069 | 3.564366 | 2.99971  | 4.07064  |
| 5.4708   | 8.723465 | 9.730765 | 10.96209 |
| 0        | 0.231731 | 0.097232 | 0.33262  |
| 18.58683 | 169.7446 | 172.6513 | 175.4925 |
| 8921.445 | 3361.471 | 3375.687 | 3436.349 |
| 2.040453 | 13.17522 | 15.75775 | 15.09005 |
| 3.211637 | 7.132645 | 6.999018 | 7.673038 |
| 1.78282  | 0.492431 | 0.290186 | 0.261087 |
| 5.223089 | 2.069947 | 2.097968 | 2.41853  |
| 2.76181  | 20.61095 | 19.51474 | 20.15058 |
| 5.103253 | 17.26147 | 16.48852 | 17.26741 |

|          |          |          |          |
|----------|----------|----------|----------|
| 0.31726  | 0.6348   | 1.021422 | 1.122129 |
| 9.435607 | 11.64755 | 11.46921 | 12.33934 |
| 112.9961 | 33.57618 | 32.40377 | 33.83278 |
| 160.6393 | 31.05032 | 29.52869 | 30.7238  |
| 30.35036 | 12.19106 | 14.21566 | 12.95025 |
| 28.23419 | 5.843378 | 6.170338 | 7.788462 |
| 0.952258 | 2.341695 | 1.475143 | 1.659893 |
| 5.102929 | 2.936585 | 2.544785 | 2.335662 |
| 5.518879 | 16.608   | 15.97863 | 15.92648 |
| 0.092003 | 1.670062 | 1.678803 | 1.772797 |
| 0.369915 | 0.156661 | 0.154443 | 0.116758 |
| 1.32305  | 7.636693 | 7.528414 | 7.431635 |
| 0.029342 | 1.548986 | 1.742971 | 1.725019 |
| 8.662472 | 24.07416 | 20.01215 | 24.12416 |
| 36.77944 | 23.30578 | 21.12017 | 23.03739 |
| 5.14494  | 36.47981 | 37.82593 | 39.11769 |
| 0.732846 | 8.694286 | 8.705746 | 9.26786  |
| 1.208395 | 2.188287 | 3.224609 | 2.672117 |
| 3.26059  | 21.94382 | 20.93455 | 22.14687 |
| 3.707873 | 5.814289 | 4.899843 | 5.50617  |
| 44.33443 | 20.70272 | 23.70184 | 24.0534  |
| 1.529622 | 0.135369 | 0.223673 | 0.146543 |
| 43.33731 | 14.74248 | 14.00321 | 17.2677  |
| 0.36158  | 0.605489 | 0.5193   | 0.917732 |
| 0.11565  | 0.470554 | 0.683705 | 0.248731 |
| 0        | 1.476237 | 0.788371 | 1.487993 |
| 15.74187 | 4.965419 | 4.426291 | 5.155962 |
| 0.05305  | 0.360226 | 0.376557 | 0.472862 |
| 59.38325 | 20.62692 | 20.42253 | 20.80681 |
| 45.65122 | 15.94378 | 17.41337 | 16.90805 |
| 4.602818 | 22.14606 | 20.83775 | 22.88291 |
| 0.232859 | 2.386808 | 2.098354 | 1.949448 |
| 192.3371 | 73.85035 | 68.22768 | 75.26222 |
| 30.08257 | 17.21002 | 15.14003 | 15.25458 |
| 2.030452 | 0.070575 | 0.163295 | 0.295014 |
| 1.623513 | 0.285743 | 0.367288 | 0.199737 |
| 18.49098 | 0.96412  | 0.637924 | 0.984759 |
| 2.171545 | 7.193575 | 6.774936 | 7.638287 |
| 2.414364 | 1.888785 | 1.696808 | 1.762521 |
| 6.216075 | 3.494782 | 3.182541 | 4.608319 |
| 4.882787 | 20.97531 | 20.25555 | 19.73913 |
| 1.723253 | 5.648586 | 6.430254 | 6.294598 |
| 252.159  | 1148.595 | 1127.059 | 1180.99  |
| 72.72487 | 34.9868  | 32.37507 | 34.82135 |
| 18.16171 | 8.415756 | 8.688615 | 7.909973 |
| 6.512994 | 49.28791 | 51.21997 | 51.21096 |
| 0.492633 | 0.267915 | 0.623246 | 1.15848  |
| 4.767794 | 17.68919 | 17.44542 | 19.91268 |
| 0.064617 | 0.79116  | 0.756067 | 0.996444 |
| 21.71927 | 9.226441 | 11.06234 | 8.685449 |
| 1.794285 | 3.877919 | 4.51705  | 4.798052 |



|          |          |          |          |
|----------|----------|----------|----------|
| 0.636067 | 1.689758 | 2.224088 | 2.513865 |
| 36.94038 | 59.64616 | 56.54969 | 60.92555 |
| 71.75663 | 13.23874 | 13.16888 | 15.46285 |
| 20.83604 | 24.14203 | 22.23978 | 22.93074 |
| 1.117657 | 0.663619 | 1.265594 | 1.556239 |
| 4.999713 | 2.465191 | 2.328167 | 1.784902 |
| 5.518907 | 6.790308 | 8.613446 | 7.210897 |
| 2.597712 | 0.985486 | 0.610176 | 0.918196 |
| 6.165357 | 2.576516 | 1.966923 | 2.589948 |
| 2.483263 | 11.20492 | 12.28634 | 12.69682 |
| 18.31003 | 0.8468   | 1.237573 | 0.795543 |
| 1.698969 | 4.96949  | 4.595818 | 4.53205  |
| 0.817103 | 0.515459 | 0.259878 | 0.321771 |
| 0.518041 | 1.546281 | 1.350006 | 1.551267 |
| 2.313747 | 10.19258 | 11.84847 | 11.51436 |
| 2.080477 | 7.392927 | 6.340386 | 7.50273  |
| 110.0726 | 47.53151 | 51.29122 | 48.42119 |
| 25.96533 | 2.522582 | 2.936519 | 3.470127 |
| 7.407187 | 3.614805 | 2.560477 | 3.068268 |
| 1.220393 | 0.7889   | 0.628406 | 0.395467 |
| 14.53781 | 34.88095 | 36.39319 | 37.34785 |
| 27.21815 | 83.41234 | 83.13145 | 84.57668 |
| 3.251196 | 36.57826 | 34.7638  | 34.49608 |
| 9.568221 | 9.007126 | 8.733172 | 8.515059 |
| 0.849005 | 3.375932 | 3.474388 | 3.276743 |
| 0.64943  | 1.352632 | 1.454408 | 1.895225 |
| 1.285186 | 0.400506 | 0.278506 | 0.510931 |
| 8.950906 | 21.74711 | 19.87223 | 20.35019 |
| 5.324123 | 2.824558 | 2.608509 | 3.024047 |
| 35.52222 | 33.37848 | 37.38768 | 34.07893 |
| 54.581   | 24.42688 | 24.53656 | 26.54345 |
| 7.385272 | 2.806764 | 2.240019 | 2.15156  |
| 1.226891 | 0.312068 | 0.478173 | 0.645485 |
| 8.775994 | 19.11003 | 17.99582 | 16.97937 |
| 5.284219 | 0.144638 | 0.440258 | 0.199861 |
| 13.18121 | 5.11433  | 4.832772 | 4.306012 |
| 2.122946 | 7.699658 | 7.57079  | 9.099212 |
| 29.56818 | 10.37348 | 11.45788 | 11.79164 |
| 0.923948 | 1.49803  | 2.179648 | 2.030243 |
| 76.08698 | 112.734  | 108.3725 | 117.1517 |
| 3.923036 | 12.11243 | 12.56041 | 11.7984  |
| 181.9239 | 48.74003 | 45.53548 | 49.92241 |
| 7.04838  | 6.657563 | 6.801283 | 6.171498 |
| 2.524891 | 2.115179 | 1.952483 | 2.687558 |
| 8.543386 | 5.05051  | 4.479837 | 5.715026 |
| 2.076002 | 1.894759 | 1.676484 | 1.771482 |
| 2.963093 | 1.333234 | 1.231506 | 1.350712 |
| 14.09442 | 30.68025 | 29.03034 | 33.05939 |
| 2.926679 | 8.02384  | 7.284106 | 6.349041 |
| 53.03785 | 13.15187 | 12.30488 | 15.85391 |
| 0.539082 | 0.899866 | 1.261307 | 1.025779 |

|          |          |          |          |
|----------|----------|----------|----------|
| 0.230476 | 1.479473 | 1.191648 | 1.186257 |
| 0.498976 | 2.154891 | 1.817735 | 2.388909 |
| 5.228618 | 11.00758 | 11.67856 | 11.98663 |
| 20.82304 | 5.335898 | 4.873275 | 5.826033 |
| 265.1518 | 112.377  | 98.16956 | 105.2302 |
| 16.21413 | 7.208242 | 7.767838 | 7.113361 |
| 0.69571  | 1.620755 | 1.386098 | 2.108253 |
| 203.3526 | 62.75726 | 59.06636 | 59.80739 |
| 2.266869 | 4.557829 | 5.204777 | 4.756233 |
| 2.761168 | 2.019311 | 1.983107 | 2.489642 |
| 1.716204 | 4.430893 | 4.621664 | 4.983742 |
| 1.068207 | 0.458868 | 0.142459 | 0.235291 |
| 0.350632 | 0.645874 | 0.835059 | 0.64417  |
| 212.5924 | 100.0245 | 93.01955 | 98.67313 |
| 46.31309 | 22.92981 | 20.72766 | 21.33859 |
| 7.619181 | 60.32451 | 58.68905 | 62.38671 |
| 11.65958 | 5.665041 | 5.346023 | 4.993156 |
| 5.268288 | 15.57769 | 17.1973  | 16.26314 |
| 2.998413 | 7.696657 | 7.092247 | 6.623423 |
| 2.397659 | 5.221879 | 3.34092  | 3.837701 |
| 150.0669 | 28.97303 | 23.05592 | 26.7582  |
| 6.724388 | 3.897755 | 3.424892 | 3.52665  |
| 3.960655 | 15.25724 | 14.71062 | 14.87461 |
| 6.874758 | 24.75462 | 26.62551 | 29.43079 |
| 1.567311 | 3.308907 | 3.614817 | 3.472698 |
| 1.129406 | 0.920778 | 0.934114 | 0.846585 |
| 0.413686 | 1.2553   | 0.773569 | 1.031149 |
| 5.839288 | 11.90823 | 10.48572 | 10.20243 |
| 3.543721 | 1.502535 | 1.046037 | 1.167357 |
| 0        | 1.8824   | 1.797045 | 1.067297 |
| 2.813544 | 4.617393 | 3.913047 | 4.786176 |
| 3.348378 | 5.621142 | 4.992842 | 5.004979 |
| 6.771236 | 1.61788  | 3.189184 | 2.616063 |
| 0.488651 | 2.569609 | 2.997112 | 3.129435 |
| 63.59034 | 273.2163 | 261.5251 | 260.5805 |
| 11.24587 | 9.731356 | 8.668987 | 7.494772 |
| 10.64199 | 16.97225 | 19.2355  | 18.7024  |
| 68.63068 | 19.80874 | 18.49923 | 20.66884 |
| 2.018501 | 0.755351 | 1.090515 | 1.000434 |
| 1.362809 | 0.997099 | 1.501225 | 1.457397 |
| 104.7796 | 136.9703 | 131.1098 | 137.2567 |
| 296.2685 | 101.6586 | 102.9342 | 116.6307 |
| 24.04714 | 36.90842 | 37.64487 | 37.93555 |
| 45.82717 | 8.772986 | 10.39222 | 9.246421 |
| 0.684581 | 8.731846 | 8.594827 | 8.144794 |
| 6.006113 | 1.736184 | 2.540409 | 2.46186  |
| 0.369456 | 1.498164 | 1.20575  | 1.247563 |
| 1.457701 | 17.44391 | 18.05713 | 20.72135 |
| 6.650744 | 1.606303 | 1.692523 | 1.87399  |
| 1.734918 | 3.973261 | 4.28412  | 4.144537 |
| 8.448137 | 1.649219 | 1.809274 | 2.10426  |

|          |          |          |          |
|----------|----------|----------|----------|
| 42.32468 | 15.6453  | 12.49959 | 13.97785 |
| 4.716844 | 14.66115 | 13.70587 | 14.42496 |
| 0.718679 | 3.346752 | 2.631686 | 3.305643 |
| 4.047809 | 1.298397 | 1.244559 | 1.344695 |
| 12.48851 | 4.216628 | 4.927842 | 5.222309 |
| 0.818123 | 1.443224 | 1.556393 | 1.838331 |
| 1.326819 | 0.446435 | 0.562215 | 1.042537 |
| 15.57589 | 61.45659 | 59.57258 | 63.66007 |
| 8.411882 | 6.068718 | 5.60024  | 6.181767 |
| 7.405352 | 3.156101 | 3.635537 | 3.280831 |
| 9.187541 | 20.63501 | 19.09784 | 20.92135 |
| 0.052502 | 0.12354  | 0.204069 | 0.32284  |
| 0.504572 | 1.683342 | 1.380175 | 1.46237  |
| 0.787704 | 1.798231 | 0.983353 | 1.193752 |
| 1.653168 | 1.309748 | 1.687099 | 1.514161 |
| 0.321343 | 1.06798  | 0.896329 | 0.712492 |
| 0.37735  | 1.484013 | 1.193067 | 0.864088 |
| 11.18315 | 4.948119 | 4.526252 | 5.585598 |
| 2.14638  | 1.75065  | 2.01431  | 2.050614 |
| 2.092371 | 11.89885 | 12.00632 | 10.81357 |
| 9.324064 | 30.80263 | 35.56197 | 32.54343 |
| 0.892032 | 2.457932 | 1.903791 | 2.263795 |
| 52.22814 | 103.1393 | 98.07274 | 104.3613 |
| 5.256801 | 14.30068 | 13.94097 | 13.41207 |
| 15.54761 | 5.316843 | 6.082882 | 6.136959 |
| 274.6647 | 102.7907 | 105.4068 | 109.2417 |
| 0.230002 | 0.852434 | 0.840771 | 0.524238 |
| 0.349867 | 0.505862 | 0.126078 | 0.331444 |
| 1.961575 | 1.347538 | 1.623992 | 1.349186 |
| 238.9312 | 150.7718 | 153.9439 | 159.7674 |
| 5.875378 | 8.168363 | 7.791918 | 8.422151 |
| 11.87561 | 4.380853 | 3.859778 | 4.411614 |
| 3.436324 | 0.860094 | 1.064699 | 1.585929 |
| 1.082736 | 0.543179 | 0.550393 | 0.635376 |
| 2.376215 | 3.8962   | 5.231493 | 5.522799 |
| 309.8599 | 936.7665 | 905.7893 | 993.3367 |
| 2.214599 | 7.069108 | 5.662353 | 6.78301  |
| 3.802902 | 0.136478 | 0.316051 | 0.099109 |
| 10.94205 | 4.848501 | 5.474609 | 5.137392 |
| 66.08837 | 27.63067 | 24.75303 | 26.96019 |
| 545.0428 | 215.155  | 208.672  | 215.0631 |
| 249.6806 | 68.68321 | 73.09217 | 66.66577 |
| 37.12014 | 12.89317 | 12.11544 | 11.97421 |
| 44.92452 | 21.09506 | 21.45412 | 21.68563 |
| 0.279015 | 0.540549 | 0.912046 | 0.487145 |
| 5.158459 | 1.931808 | 1.689057 | 1.515848 |
| 10.64461 | 31.66772 | 32.00363 | 30.49823 |
| 15.02847 | 14.09463 | 13.92011 | 14.55191 |
| 1.514591 | 7.675394 | 6.784519 | 7.490897 |
| 0.927808 | 0.561848 | 0.725994 | 0.656227 |
| 0.201219 | 1.508675 | 1.195337 | 1.523101 |

|          |          |          |          |
|----------|----------|----------|----------|
| 3.417113 | 1.31852  | 1.374025 | 1.153319 |
| 3.242646 | 1.312699 | 0.885547 | 1.436625 |
| 295.2231 | 107.8787 | 99.55318 | 109.6311 |
| 18.20971 | 69.02208 | 70.9055  | 69.88648 |
| 4.715455 | 2.137301 | 2.309154 | 2.520173 |
| 2.373955 | 1.28862  | 0.640569 | 0.909408 |
| 1.954876 | 4.169174 | 4.705291 | 5.527225 |
| 0.652816 | 1.071058 | 1.400263 | 1.187057 |
| 134.902  | 45.14192 | 41.57552 | 46.01419 |
| 6.580513 | 1.967126 | 1.11986  | 1.848254 |
| 27.19553 | 5.744951 | 5.36786  | 4.948972 |
| 23.91089 | 62.24065 | 62.94443 | 59.78908 |
| 9.329429 | 31.85195 | 32.04714 | 34.22902 |
| 20.62195 | 8.2499   | 8.220971 | 7.991698 |
| 6.934922 | 7.861369 | 7.123337 | 9.400258 |
| 0.891311 | 2.232619 | 2.363065 | 1.705421 |
| 0.799889 | 3.365588 | 1.80056  | 3.287452 |
| 28.52396 | 31.63537 | 34.52371 | 32.51473 |
| 1.042124 | 0.982643 | 1.623866 | 1.265185 |
| 42.20965 | 6.801432 | 6.460059 | 7.807144 |
| 86.74393 | 209.9413 | 211.8013 | 182.9526 |
| 12.51376 | 3.078045 | 3.292241 | 2.697311 |
| 62.28741 | 15.91459 | 14.85836 | 16.6661  |
| 3.467306 | 6.981426 | 7.548242 | 7.651486 |
| 6.872774 | 2.5969   | 1.941388 | 2.514066 |
| 24.07392 | 8.89961  | 6.481662 | 7.475122 |
| 9.266665 | 21.85466 | 19.43731 | 19.0331  |
| 6.445498 | 0.62115  | 1.017516 | 0.45781  |
| 1.069038 | 2.330396 | 2.061346 | 2.871574 |
| 0.893075 | 3.290744 | 3.088933 | 3.899577 |
| 7.956752 | 3.689412 | 3.786881 | 3.034564 |
| 4.877042 | 41.71105 | 37.02552 | 40.66686 |
| 3.17577  | 11.87275 | 10.85566 | 10.32438 |
| 18.52543 | 10.15437 | 10.37145 | 11.89461 |
| 0.912043 | 2.454108 | 2.522711 | 2.861289 |
| 0.198688 | 0.242407 | 0.444432 | 0.544453 |
| 68.44092 | 28.73924 | 28.57332 | 29.50431 |
| 3.01121  | 1.386573 | 1.379155 | 1.730811 |
| 1.438425 | 5.129463 | 5.697258 | 5.544765 |
| 0.919613 | 3.590226 | 2.45454  | 2.408247 |
| 12.0905  | 4.415916 | 5.888572 | 4.573811 |
| 31.29996 | 38.01846 | 40.09214 | 39.80307 |
| 3.47442  | 1.297994 | 1.183285 | 1.59886  |
| 25.26817 | 9.79754  | 10.5639  | 11.30175 |
| 16.20723 | 9.084388 | 8.700136 | 8.984704 |
| 2.283844 | 6.673449 | 7.635555 | 8.486739 |
| 14.51747 | 11.02781 | 12.17333 | 11.70955 |
| 15.15246 | 4.69166  | 4.832712 | 4.871394 |
| 37.58372 | 86.04262 | 86.25957 | 94.01609 |
| 10.61978 | 12.80487 | 12.57162 | 13.05313 |
| 1.592886 | 0.3573   | 0.180311 | 0.178193 |

|          |          |          |          |
|----------|----------|----------|----------|
| 3.836406 | 20.98396 | 22.51003 | 19.15237 |
| 0.591159 | 0.303089 | 0.161779 | 0.35042  |
| 1.079666 | 3.521674 | 4.571482 | 4.462219 |
| 29.91316 | 14.74188 | 13.36309 | 15.25035 |
| 0.086859 | 0.247631 | 0.303532 | 0.25709  |
| 12.76433 | 5.650065 | 6.082057 | 6.030892 |
| 168.9556 | 76.98517 | 78.03107 | 81.12868 |
| 5.479136 | 4.120064 | 4.169024 | 4.131752 |
| 0.821166 | 2.42281  | 1.654737 | 2.032206 |
| 0.691931 | 1.453627 | 2.08914  | 1.291699 |
| 55.96935 | 181.7432 | 191.586  | 194.5522 |
| 5.386564 | 23.19623 | 19.97607 | 22.72407 |
| 62.60631 | 25.09681 | 25.04115 | 28.15873 |
| 6.680717 | 4.591065 | 5.066161 | 5.558156 |
| 50.79048 | 27.48577 | 24.42222 | 26.23527 |
| 63.49294 | 33.80787 | 37.51269 | 33.39512 |
| 0.085955 | 1.025401 | 1.156052 | 0.825319 |
| 0        | 0.701078 | 0.728677 | 0.496128 |
| 10.19088 | 4.532441 | 4.437064 | 4.155734 |
| 639.9813 | 304.0553 | 306.5681 | 315.3715 |
| 6.727476 | 19.67414 | 18.18899 | 19.20038 |
| 1.657768 | 0.659091 | 0.791913 | 1.042456 |
| 52.307   | 17.10423 | 16.30707 | 17.29355 |
| 2.571914 | 1.906098 | 1.953809 | 2.176191 |
| 4.242859 | 1.356574 | 1.817547 | 1.39608  |
| 6.310667 | 2.885713 | 3.371092 | 3.541008 |
| 59.65006 | 24.93786 | 24.31761 | 25.51166 |
| 57.48108 | 463.0793 | 449.9385 | 403.9536 |
| 10.50649 | 4.478124 | 5.024074 | 4.983673 |
| 37.16665 | 12.74033 | 10.33838 | 10.88228 |
| 23.00633 | 10.41803 | 11.26353 | 12.39148 |
| 119.8002 | 55.48588 | 58.96877 | 59.09369 |
| 0.134084 | 1.004642 | 0.842912 | 0.762265 |
| 17.90931 | 5.381619 | 4.773009 | 4.445626 |
| 0.957719 | 5.513569 | 5.009264 | 4.642138 |
| 0.467259 | 0.011538 | 0.054433 | 0        |
| 5.161271 | 11.51248 | 10.43003 | 10.90253 |
| 17.39656 | 0.263812 | 0.490006 | 0.083045 |
| 4.750057 | 1.249584 | 0.779998 | 0.512556 |
| 18.53665 | 42.16728 | 40.64301 | 43.22133 |
| 2.208411 | 0.491802 | 0.761708 | 1.359648 |
| 144.0395 | 160.0952 | 157.4424 | 173.0797 |
| 2.298856 | 5.723892 | 5.773561 | 6.602974 |
| 1.059281 | 1.690307 | 2.200329 | 2.70887  |
| 7.902597 | 4.684354 | 5.499921 | 3.729148 |
| 6.278334 | 2.346394 | 2.438761 | 2.66573  |
| 0.890602 | 5.073315 | 5.383454 | 6.220064 |
| 6.441272 | 2.585822 | 1.778325 | 1.756539 |
| 14.85256 | 15.27526 | 16.48256 | 15.71345 |
| 42.03284 | 9.559967 | 8.593627 | 8.645355 |
| 4.840972 | 3.529594 | 3.645002 | 3.266377 |

|          |          |          |          |
|----------|----------|----------|----------|
| 0.855312 | 0.742235 | 0.92433  | 0.776489 |
| 5.276042 | 6.957519 | 6.157263 | 6.622018 |
| 22.35326 | 10.80918 | 9.790054 | 10.34339 |
| 40.89505 | 100.1986 | 98.79036 | 105.3811 |
| 179.566  | 775.704  | 788.7508 | 797.9687 |
| 4.259469 | 1.721506 | 1.690832 | 1.529718 |
| 105.2498 | 30.44038 | 32.31669 | 28.65049 |
| 1.962824 | 3.848567 | 3.004243 | 2.801704 |
| 11.24353 | 18.34015 | 17.09103 | 18.52699 |
| 27.44169 | 34.45114 | 29.98001 | 35.87314 |
| 3.437794 | 1.015837 | 2.006324 | 1.504192 |
| 125.3927 | 52.16008 | 51.54658 | 53.80433 |
| 0.365395 | 2.565414 | 1.908487 | 1.98391  |
| 49.87079 | 51.4761  | 50.08648 | 49.055   |
| 0.571798 | 3.730742 | 4.516033 | 3.879766 |
| 6.779853 | 3.432894 | 3.898174 | 3.690116 |
| 111.4226 | 48.66609 | 51.99617 | 49.72295 |
| 13.20062 | 31.98921 | 34.51586 | 34.51363 |
| 1.688926 | 0.532044 | 0.526164 | 0.550771 |
| 0.237077 | 0.670004 | 0.679955 | 0.413419 |
| 1.745708 | 0.460981 | 0.701396 | 0.642501 |
| 14.75594 | 64.74733 | 53.91542 | 66.44956 |
| 0.606439 | 1.388806 | 1.756584 | 2.359944 |
| 132.5868 | 44.9342  | 47.33492 | 49.17095 |
| 4.313509 | 10.77817 | 10.47002 | 12.4746  |
| 7.45879  | 6.663464 | 7.475542 | 6.75648  |
| 1.402444 | 0.51066  | 0.697919 | 0.62243  |
| 12.47406 | 48.11746 | 46.2587  | 47.23819 |
| 1.679027 | 8.150809 | 9.393615 | 7.397324 |
| 6.12577  | 3.504016 | 4.014156 | 2.886126 |
| 12.75486 | 5.549094 | 2.645096 | 3.446512 |
| 3.850675 | 3.753755 | 3.108563 | 3.777817 |
| 17.99482 | 4.535166 | 3.959241 | 5.375341 |
| 16.16616 | 7.193702 | 7.620341 | 8.541672 |
| 6.208156 | 9.857947 | 8.55933  | 8.805844 |
| 15.12808 | 4.426012 | 4.403305 | 4.172111 |
| 0.233939 | 1.790872 | 1.311265 | 2.171093 |
| 2.799354 | 18.16936 | 17.60547 | 20.16068 |
| 6.054606 | 17.07328 | 17.42328 | 18.06924 |
| 0.785771 | 2.845493 | 3.114867 | 2.525924 |
| 4.213565 | 1.171208 | 1.247405 | 2.132862 |
| 0.17678  | 9.743813 | 10.13372 | 9.994178 |
| 3.583506 | 1.389552 | 1.353135 | 2.025092 |
| 7.229906 | 27.26609 | 24.36298 | 28.02539 |
| 1.208178 | 1.972669 | 2.25684  | 2.376317 |
| 1.451525 | 3.194789 | 3.820691 | 3.209222 |
| 1.946653 | 19.67583 | 20.93839 | 23.54994 |
| 22.24457 | 63.2674  | 61.93684 | 66.37804 |
| 10.38932 | 5.435826 | 5.077748 | 5.288729 |
| 22.50683 | 4.194616 | 3.213485 | 3.55526  |
| 14.77389 | 0.660747 | 0.298692 | 0.921114 |

|          |          |          |          |
|----------|----------|----------|----------|
| 1.852072 | 15.88932 | 15.26516 | 15.94629 |
| 0.428357 | 1.217463 | 1.010843 | 1.449354 |
| 1.075911 | 4.134836 | 3.539914 | 3.59035  |
| 0.477915 | 1.311944 | 1.702973 | 1.282691 |
| 3.635229 | 3.223299 | 4.251763 | 3.985322 |
| 95.48558 | 44.93232 | 45.24431 | 44.40717 |
| 0.818858 | 1.709794 | 1.557946 | 1.973595 |
| 30.42397 | 6.52424  | 6.58337  | 6.969548 |
| 5.324522 | 34.6662  | 38.23817 | 34.36686 |
| 2.932494 | 4.416023 | 4.441793 | 5.886238 |
| 48.87226 | 177.9677 | 170.5    | 178.8702 |
| 0.259052 | 2.435155 | 1.720445 | 2.896114 |
| 0.538443 | 1.843162 | 1.65831  | 1.789319 |
| 1.206582 | 8.664983 | 7.805506 | 7.131622 |
| 6.596508 | 8.033904 | 7.015167 | 6.954198 |
| 2.858366 | 26.28662 | 30.35783 | 28.83402 |
| 39.20838 | 13.8603  | 13.24857 | 16.33662 |
| 716.8524 | 236.2962 | 231.4465 | 240.7951 |
| 7.177596 | 18.08614 | 17.57228 | 20.05917 |
| 0.501284 | 7.653231 | 7.935048 | 6.751399 |
| 3.811491 | 8.781348 | 9.219767 | 9.209529 |
| 1.84866  | 3.864718 | 3.690417 | 3.246856 |
| 1.625673 | 0.86473  | 0.886001 | 0.890891 |
| 314.9858 | 115.1854 | 118.1344 | 124.9177 |
| 2.235947 | 3.883579 | 2.580756 | 4.067392 |
| 0.950011 | 5.213052 | 6.032579 | 5.123486 |
| 12.07142 | 5.650608 | 5.414013 | 5.474041 |
| 1.16435  | 2.936211 | 2.957347 | 3.511104 |
| 1.701614 | 5.703621 | 5.555822 | 5.737597 |
| 25.8842  | 10.54136 | 9.483971 | 9.971608 |
| 1.473322 | 1.529126 | 1.519427 | 1.847555 |
| 9.493938 | 1.824366 | 0.901833 | 1.599654 |
| 8.02448  | 13.80664 | 14.50552 | 14.49149 |
| 97.13007 | 36.07408 | 33.22222 | 35.05594 |
| 0        | 1.627766 | 2.20518  | 2.320985 |
| 0.125624 | 0.443425 | 0.575223 | 0.451286 |
| 3.352663 | 0.782086 | 0.595518 | 0.541949 |
| 3.273953 | 1.021454 | 1.386033 | 1.193674 |
| 13.95399 | 4.37624  | 4.986646 | 5.037199 |
| 2.853956 | 8.457302 | 7.612435 | 7.600072 |
| 6.960548 | 13.35536 | 16.05302 | 15.75353 |
| 21.94356 | 12.89476 | 12.02674 | 13.54333 |
| 5.93762  | 3.92555  | 3.2256   | 3.255456 |
| 2.464362 | 3.935406 | 3.79479  | 4.047261 |
| 3.539031 | 4.874384 | 4.224437 | 6.172651 |
| 10.27235 | 23.83542 | 23.17227 | 23.58707 |
| 0.198364 | 1.138766 | 0.784691 | 1.311636 |
| 7.283986 | 3.955297 | 4.287144 | 3.867479 |
| 2.930705 | 7.599222 | 7.616738 | 7.506677 |
| 0.376108 | 0.962244 | 1.144515 | 1.151678 |
| 0.113427 | 0.795071 | 0.698729 | 0.837024 |

|          |          |          |          |
|----------|----------|----------|----------|
| 47.39193 | 13.40578 | 12.92593 | 14.63776 |
| 2.929772 | 0.778853 | 0.840806 | 0.722509 |
| 1.073841 | 60.71515 | 62.75761 | 61.70438 |
| 3.4692   | 4.949663 | 4.325378 | 4.561046 |
| 1.350813 | 3.312863 | 4.316633 | 3.385984 |
| 3.430876 | 1.452449 | 1.938786 | 2.624153 |
| 10.93158 | 2.202275 | 2.343182 | 1.76031  |
| 0.44235  | 1.405943 | 1.614897 | 1.578288 |
| 1.835329 | 0.54936  | 0.903346 | 0.873567 |
| 0.423447 | 0.123289 | 0.192198 | 0.155812 |
| 0.313192 | 8.254123 | 7.132895 | 7.584786 |
| 1.646883 | 2.681988 | 1.74761  | 3.111556 |
| 6.506299 | 2.757159 | 3.529586 | 2.917192 |
| 0.757458 | 1.535791 | 1.764451 | 1.696033 |
| 2.702147 | 1.399089 | 0.894046 | 1.225245 |
| 5.536085 | 15.75629 | 14.84792 | 15.71374 |
| 10.14779 | 6.707109 | 7.650558 | 8.4953   |
| 10.97262 | 25.99631 | 25.21739 | 27.03728 |
| 3.526009 | 3.55414  | 2.877567 | 3.385315 |
| 105.6627 | 30.82979 | 32.73059 | 31.98563 |
| 2.090607 | 5.25291  | 6.098251 | 5.869246 |
| 1.96323  | 2.832887 | 3.148178 | 2.825473 |
| 313.6324 | 127.1727 | 120.1692 | 127.165  |
| 21.88321 | 82.56526 | 79.23303 | 82.49046 |
| 7.682448 | 13.21    | 11.84241 | 13.1423  |
| 3.079283 | 4.693397 | 4.39016  | 5.655618 |
| 5.95647  | 16.09384 | 16.76952 | 16.86432 |
| 4.647906 | 4.792372 | 3.885608 | 4.499549 |
| 0.888509 | 8.499605 | 8.939186 | 8.970938 |
| 2.081462 | 19.18406 | 17.35783 | 17.4181  |
| 3.644281 | 7.996515 | 7.863666 | 8.658871 |
| 48.79289 | 21.34797 | 19.60616 | 22.09471 |
| 0.163297 | 0.490154 | 0.551743 | 0.967996 |
| 31.34889 | 11.29687 | 10.20482 | 11.61001 |
| 147.3006 | 22.12301 | 22.75524 | 22.25194 |
| 26.06016 | 32.03876 | 33.56237 | 34.49338 |
| 26.97135 | 11.47064 | 11.01507 | 11.6515  |
| 6.387627 | 26.08752 | 24.29362 | 26.69591 |
| 0.281854 | 3.569966 | 3.284101 | 3.598153 |
| 2.345991 | 1.260495 | 1.314234 | 1.130727 |
| 0.153302 | 0.515395 | 0.659837 | 0.664678 |
| 0        | 4.819427 | 3.105479 | 3.504712 |
| 61.65123 | 218.9009 | 212.4792 | 221.9775 |
| 7.61298  | 18.89615 | 18.08566 | 19.29813 |
| 3.764614 | 0        | 0        | 0        |
| 10.52441 | 233.782  | 230.4808 | 240.2453 |
| 0.943692 | 0.237159 | 0.281564 | 0.459744 |
| 17.48675 | 86.83497 | 80.93636 | 84.26764 |
| 14.29583 | 14.89922 | 15.4025  | 15.14503 |
| 0        | 1.249392 | 0.676448 | 1.22576  |
| 2.4626   | 0.533608 | 0.500434 | 0.430502 |



|          |          |          |          |
|----------|----------|----------|----------|
| 129.4836 | 149.7115 | 147.1418 | 155.3806 |
| 3.262781 | 1.224153 | 1.201168 | 1.248631 |
| 4.227995 | 11.06046 | 11.61081 | 12.19001 |
| 4.304154 | 6.482475 | 5.918603 | 4.503917 |
| 0.779701 | 1.845629 | 2.109272 | 1.241566 |
| 12.37737 | 13.60262 | 13.98667 | 12.5938  |
| 8.447392 | 1.074056 | 1.168495 | 1.518408 |
| 0.138896 | 4.151107 | 4.623383 | 4.337365 |
| 21.12404 | 33.37733 | 33.39059 | 30.5273  |
| 0.439052 | 2.950773 | 3.778824 | 3.968279 |
| 4.359807 | 1.127824 | 1.43988  | 1.102209 |
| 2.575743 | 20.58169 | 22.23539 | 22.77938 |
| 4.720201 | 11.53395 | 11.36128 | 12.06732 |
| 12.4402  | 3.874197 | 4.255471 | 3.271478 |
| 0.645438 | 3.057039 | 2.394304 | 2.734174 |
| 9.868254 | 2.162724 | 2.294391 | 2.733534 |
| 40.93818 | 16.95349 | 12.91401 | 14.80891 |
| 76.44149 | 39.97651 | 33.79864 | 36.74166 |
| 59.15011 | 0.486344 | 0.430929 | 0.539564 |
| 5.880099 | 14.80113 | 13.7127  | 15.61511 |
| 79.60234 | 189.3818 | 188.346  | 194.9451 |
| 9.337031 | 20.76528 | 19.58145 | 21.54437 |
| 70.48868 | 25.61684 | 20.76135 | 26.26903 |
| 14.20454 | 16.19478 | 15.66389 | 14.53826 |
| 0.900106 | 3.176731 | 3.95788  | 3.591316 |
| 1.204912 | 4.749425 | 6.198805 | 6.614505 |
| 71.674   | 201.7923 | 201.8654 | 212.6717 |
| 8.115224 | 52.74623 | 52.08593 | 52.276   |
| 32.24754 | 11.49902 | 10.90304 | 11.61736 |
| 4.89728  | 58.85793 | 57.02817 | 61.24511 |
| 77.00065 | 48.13119 | 49.27224 | 49.36716 |
| 8.815489 | 3.6546   | 2.256092 | 2.898762 |
| 14.46635 | 29.62816 | 31.88139 | 33.30145 |
| 4.937855 | 6.722184 | 7.890186 | 7.786616 |
| 57.67545 | 41.54172 | 40.5803  | 43.56229 |
| 6.374629 | 18.80028 | 16.677   | 18.22055 |
| 0.107889 | 1.241081 | 1.636338 | 2.298912 |
| 3.751235 | 0.498844 | 0.558907 | 0.3264   |
| 28.50417 | 106.2835 | 103.0521 | 106.1907 |
| 2.723393 | 1.133401 | 1.097062 | 0.909149 |
| 30.54231 | 5.329717 | 5.470252 | 4.396511 |
| 147.0473 | 49.43899 | 53.38581 | 51.15273 |
| 0.291175 | 0.771616 | 0.92843  | 1.194098 |
| 0.179068 | 0.565201 | 0.579082 | 0.464891 |
| 0.149552 | 0.395138 | 0.244088 | 0.230214 |
| 7.284588 | 5.52446  | 4.801547 | 5.762577 |
| 4.719987 | 18.21728 | 17.41639 | 17.74519 |
| 5.515755 | 3.672535 | 2.171351 | 3.329218 |
| 3.565458 | 5.292017 | 4.421416 | 5.347806 |
| 4.742112 | 7.048344 | 7.401566 | 6.908559 |
| 0.542279 | 0.234664 | 0.424441 | 0.419305 |

|          |          |          |          |
|----------|----------|----------|----------|
| 0.457208 | 1.341417 | 1.048962 | 1.33456  |
| 1.94925  | 3.381169 | 2.622049 | 3.201545 |
| 41.65885 | 16.6903  | 17.96972 | 17.43191 |
| 17.76904 | 34.01901 | 32.79876 | 36.40222 |
| 6.777685 | 3.736004 | 3.293191 | 3.13343  |
| 3.424062 | 1.233396 | 1.723965 | 0.957505 |
| 21.22545 | 45.58703 | 44.72414 | 46.66075 |
| 36.88405 | 103.7179 | 106.851  | 111.6644 |
| 0.666142 | 2.488214 | 3.171772 | 2.558529 |
| 1.362646 | 3.117952 | 2.763148 | 3.663178 |
| 11.50853 | 5.345493 | 7.627283 | 8.485599 |
| 126.3272 | 37.29162 | 35.19428 | 30.21237 |
| 2.061167 | 1.35744  | 1.75578  | 1.432482 |
| 11.16444 | 2.338014 | 2.861898 | 2.99382  |
| 2.68414  | 1.159048 | 1.566559 | 1.209833 |
| 1.646633 | 8.002636 | 6.165643 | 6.078959 |
| 0.941201 | 3.654094 | 2.360357 | 4.080932 |
| 0.784955 | 1.883536 | 1.663227 | 2.143312 |
| 3.254339 | 5.265058 | 5.430583 | 5.106559 |
| 21.13875 | 7.607435 | 6.261798 | 7.60824  |
| 8.860354 | 3.164256 | 3.570285 | 3.303585 |
| 38.48754 | 13.55353 | 12.9867  | 14.07057 |
| 2.641295 | 7.211353 | 6.817669 | 8.791194 |
| 4.900458 | 15.22271 | 13.12304 | 15.08213 |
| 0.401668 | 3.690219 | 2.668671 | 2.668123 |
| 0.288031 | 6.245195 | 2.831633 | 4.510886 |
| 46.51253 | 15.12311 | 22.10409 | 17.96861 |
| 6.234115 | 13.39504 | 13.71398 | 14.91283 |
| 5.05947  | 4.302532 | 3.208242 | 4.060141 |
| 8.055085 | 11.33171 | 10.77578 | 12.8987  |
| 2.150936 | 6.895472 | 7.988217 | 6.998241 |
| 14.79899 | 3.29802  | 2.612571 | 3.16592  |
| 0.274053 | 1.71199  | 1.040259 | 1.97683  |
| 0.816718 | 2.911757 | 2.34758  | 2.705482 |
| 15.29335 | 5.223855 | 4.188752 | 5.256581 |
| 4.242082 | 3.691737 | 2.815136 | 3.386863 |
| 11.79505 | 18.24712 | 18.98497 | 20.43808 |
| 2.420741 | 7.36585  | 10.02235 | 9.596698 |
| 13.15106 | 2.542005 | 2.478987 | 1.821141 |
| 37.65451 | 242.7457 | 246.8198 | 254.9251 |
| 2.86563  | 0.805634 | 1.208351 | 1.024766 |
| 4.926388 | 7.436012 | 7.456687 | 7.69841  |
| 0.173693 | 7.925873 | 8.628854 | 8.013485 |
| 2.520047 | 0.872615 | 0.857609 | 1.107697 |
| 4.75883  | 1.594156 | 2.036639 | 2.308436 |
| 76.9364  | 69.23298 | 71.47544 | 70.51608 |
| 22.29427 | 11.57112 | 10.54599 | 10.90992 |
| 0.573322 | 2.44617  | 2.199294 | 1.561848 |
| 8.460212 | 3.214805 | 2.93571  | 2.470746 |
| 2.361275 | 4.588486 | 4.909985 | 4.352138 |
| 1.331511 | 1.467631 | 2.219402 | 1.497968 |

|          |          |          |          |
|----------|----------|----------|----------|
| 227.4186 | 76.35814 | 69.57352 | 70.37421 |
| 16.14627 | 2.087416 | 1.541704 | 1.907205 |
| 221.1794 | 51.23333 | 48.53464 | 54.14102 |
| 2.584969 | 6.504754 | 6.22607  | 6.620285 |
| 73.00292 | 26.94901 | 24.96406 | 27.59766 |
| 1.205465 | 2.320738 | 3.499185 | 4.04667  |
| 7.273934 | 3.244175 | 2.839705 | 4.242362 |
| 0.849209 | 1.412338 | 1.428458 | 1.952704 |
| 4.393598 | 6.828351 | 5.551855 | 7.070216 |
| 74.68525 | 45.6129  | 41.76431 | 43.4791  |
| 444.5244 | 147.7646 | 148.0154 | 149.3554 |
| 4.984904 | 9.164614 | 7.721348 | 10.87892 |
| 12.29043 | 6.628233 | 5.739552 | 6.834376 |
| 5.839057 | 1.393118 | 3.608392 | 2.513443 |
| 3.627968 | 46.10131 | 46.97468 | 48.46747 |
| 1.22072  | 2.579682 | 2.027935 | 2.668659 |
| 132.2064 | 15.62957 | 12.70841 | 12.25233 |
| 1.817132 | 5.118814 | 6.774172 | 5.898189 |
| 0.782854 | 3.241905 | 3.307159 | 3.026023 |
| 0.775614 | 2.161557 | 2.382168 | 2.37547  |
| 28.8707  | 200.7715 | 200.3358 | 209.0565 |
| 6.030025 | 0.219284 | 0.783759 | 0.341663 |
| 6.417287 | 2.537955 | 2.746981 | 2.866135 |
| 0.317384 | 5.240005 | 3.258785 | 4.035403 |
| 0        | 0.766323 | 1.338167 | 1.410192 |
| 138.1617 | 13.05851 | 12.91034 | 14.58472 |
| 0.600285 | 4.878409 | 3.56428  | 3.498096 |
| 4.069191 | 15.83501 | 17.2325  | 17.21635 |
| 3.665897 | 9.405768 | 8.197807 | 10.37064 |
| 1.973537 | 5.683434 | 4.491327 | 4.835811 |
| 1.795124 | 5.048733 | 5.15812  | 4.959234 |
| 14.20145 | 40.54741 | 41.34956 | 43.86739 |
| 0.95713  | 3.891501 | 2.855117 | 2.929652 |
| 3.000787 | 32.13318 | 28.62359 | 32.14752 |
| 18.38843 | 6.799289 | 7.356618 | 7.340041 |
| 33.35766 | 8.753965 | 9.80981  | 10.18703 |
| 0.13522  | 0.574971 | 0.853935 | 0.774636 |
| 23.17469 | 4.745023 | 5.286127 | 5.341063 |
| 0        | 0.072914 | 0.253867 | 0.076596 |
| 7.07969  | 3.586578 | 2.968146 | 2.849702 |
| 1.864672 | 0.515751 | 1.085057 | 0.660545 |
| 3.369301 | 4.709977 | 3.896215 | 4.585823 |
| 0        | 0.362608 | 0.35673  | 0.384007 |
| 1.997502 | 5.623459 | 5.73101  | 5.999165 |
| 30.23089 | 19.90672 | 21.54216 | 21.96419 |
| 4.310636 | 10.26144 | 11.18701 | 11.13946 |
| 2.508203 | 1.147446 | 1.026805 | 0.754153 |
| 11.29878 | 76.55933 | 79.00321 | 77.46777 |
| 1.475337 | 0.927185 | 0.54156  | 0.853794 |
| 0.234288 | 0.541887 | 0.946909 | 0.656946 |
| 0.663208 | 20.38365 | 19.98084 | 22.92601 |

|          |          |          |          |
|----------|----------|----------|----------|
| 16.95866 | 203.038  | 195.2608 | 207.2903 |
| 14.63146 | 45.16467 | 44.00683 | 47.81493 |
| 231.4526 | 111.8138 | 115.2578 | 119.7127 |
| 11.27575 | 25.63183 | 26.22314 | 29.24153 |
| 2.238635 | 7.748702 | 8.826233 | 9.37814  |
| 11.71964 | 31.23233 | 32.98415 | 31.08476 |
| 5.180526 | 165.2867 | 158.4116 | 160.592  |
| 4.454723 | 4.253765 | 5.205672 | 4.971595 |
| 4.437497 | 1.840735 | 2.299922 | 2.973283 |
| 39.78074 | 2.536667 | 3.004648 | 2.856773 |
| 26.36772 | 11.2533  | 8.755755 | 8.71544  |
| 53.51136 | 14.33954 | 15.15244 | 17.18174 |
| 3.746399 | 6.916233 | 6.874241 | 6.034606 |
| 0.441527 | 1.444696 | 1.435113 | 1.838646 |
| 265.6635 | 920.2917 | 909.185  | 943.2886 |
| 21.2977  | 3.78428  | 3.260742 | 3.670969 |
| 49.16952 | 25.05724 | 21.91392 | 24.81572 |
| 1.258889 | 2.612897 | 3.496461 | 3.250182 |
| 0.584457 | 0.62859  | 0.402761 | 0.68023  |
| 5.64297  | 2.118321 | 1.59192  | 1.887991 |
| 19.34001 | 10.51298 | 8.46032  | 9.192998 |
| 2.559368 | 22.54614 | 22.85682 | 24.45562 |
| 2.821201 | 2.324158 | 1.86575  | 2.445914 |
| 6.440548 | 22.00388 | 20.93812 | 22.49943 |
| 5.312913 | 2.169507 | 2.303044 | 1.75738  |
| 53.93969 | 17.99228 | 14.8662  | 15.5343  |
| 6.756642 | 4.073064 | 2.692865 | 3.598022 |
| 4.54791  | 14.53592 | 13.01729 | 17.32523 |
| 2.142275 | 7.581631 | 8.109169 | 9.069584 |
| 1.498013 | 1.388976 | 2.649204 | 3.217954 |
| 9.998071 | 56.25211 | 54.84228 | 58.33621 |
| 5.298946 | 25.43329 | 23.69374 | 24.59922 |
| 4.742649 | 12.17566 | 11.53967 | 12.52225 |
| 69.63745 | 99.48695 | 100.5768 | 103.8817 |
| 20.97472 | 5.012502 | 4.444043 | 4.456186 |
| 9.519079 | 4.14828  | 4.307198 | 5.792317 |
| 9.331297 | 15.88595 | 14.26562 | 15.80642 |
| 1.944803 | 39.66221 | 36.34633 | 37.86258 |
| 99.48996 | 291.6159 | 280.6993 | 306.3492 |
| 29.12318 | 4.766922 | 5.645994 | 6.035816 |
| 7.795591 | 16.30748 | 16.64401 | 18.06455 |
| 0.666737 | 0.99803  | 1.597002 | 1.418896 |
| 2.760405 | 0.913337 | 0.993395 | 0.938564 |
| 2.619878 | 2.848973 | 1.821411 | 2.003482 |
| 1.144941 | 1.229591 | 0.888785 | 0.626608 |
| 13.33845 | 17.93339 | 19.83697 | 19.90164 |
| 1.374089 | 1.154696 | 1.640494 | 2.288096 |
| 2.567073 | 5.121211 | 5.450099 | 5.457484 |
| 42.83757 | 11.81764 | 10.46866 | 11.79382 |
| 2.41451  | 0.824845 | 0.974498 | 0.976049 |
| 15.33    | 28.88592 | 29.8155  | 28.17618 |

|          |          |          |          |
|----------|----------|----------|----------|
| 3.709295 | 10.9987  | 14.47143 | 12.62857 |
| 1.532443 | 4.041623 | 3.41437  | 4.352383 |
| 0.336177 | 7.481728 | 7.266296 | 8.556834 |
| 11.3434  | 5.890682 | 6.129881 | 5.306252 |
| 1.414482 | 5.122406 | 4.016752 | 5.797853 |
| 4.654804 | 1.351897 | 1.953307 | 1.815611 |
| 1.06406  | 3.432279 | 2.123661 | 2.385242 |
| 19.35363 | 4.037608 | 4.290885 | 5.245758 |
| 40.90617 | 35.03624 | 35.09966 | 38.18467 |
| 3.368401 | 2.977244 | 3.306128 | 3.394027 |
| 0.6721   | 0.157056 | 0.392106 | 0.496461 |
| 1.585445 | 2.417648 | 2.41645  | 2.232613 |
| 45.88252 | 199.9067 | 174.8732 | 203.2743 |
| 46.62358 | 20.63232 | 18.04839 | 18.89262 |
| 172.9575 | 39.24416 | 42.32721 | 42.55753 |
| 6.433319 | 5.909597 | 6.765437 | 8.136528 |
| 6.615505 | 1.188013 | 1.886263 | 1.479628 |
| 0.930763 | 1.327778 | 1.255872 | 0.721355 |
| 4.993545 | 8.120976 | 8.184233 | 10.56366 |
| 17.56103 | 65.8255  | 60.52974 | 62.80403 |
| 193.4759 | 54.70187 | 57.98728 | 54.25446 |
| 0.478948 | 1.362966 | 1.146029 | 1.168326 |
| 158.4284 | 555.5975 | 497.8747 | 549.7979 |
| 5.22861  | 3.979701 | 4.250134 | 3.248594 |
| 3.195358 | 10.42389 | 9.290655 | 9.091188 |
| 0.256693 | 1.548597 | 1.475533 | 0.731559 |
| 0.393553 | 0.092753 | 0.19213  | 0.254281 |
| 0.493042 | 0.325003 | 0.177644 | 0.402499 |
| 7.016278 | 4.925191 | 5.124605 | 6.256677 |
| 29.49544 | 16.10018 | 13.13388 | 15.9009  |
| 2.488438 | 6.852618 | 7.977577 | 7.863277 |
| 10.12035 | 10.17318 | 8.803704 | 8.939631 |
| 9.379148 | 5.381601 | 4.349117 | 4.676024 |
| 9.981738 | 16.21726 | 17.57004 | 19.60873 |
| 6.097029 | 9.015519 | 11.98808 | 13.62372 |
| 1.433049 | 2.403253 | 3.126736 | 3.208636 |
| 1.76085  | 0.488994 | 0.425281 | 0.631977 |
| 1.069276 | 1.928271 | 2.112957 | 1.787035 |
| 1.584011 | 5.77016  | 5.31727  | 5.686836 |
| 3.102453 | 10.05717 | 8.849793 | 8.731139 |
| 96.49571 | 25.59174 | 28.23257 | 29.62915 |
| 3.70903  | 18.30891 | 22.09822 | 21.36655 |
| 2.695629 | 7.056664 | 7.125111 | 7.084583 |
| 819.3384 | 115.8129 | 114.1112 | 120.0732 |
| 8.529651 | 4.103123 | 3.830485 | 4.223856 |
| 27.76119 | 7.145648 | 6.926315 | 5.91035  |
| 11.56816 | 8.380286 | 9.660819 | 10.1748  |
| 22.14934 | 9.09637  | 8.170252 | 8.523757 |
| 11.06793 | 3.195404 | 2.625284 | 2.696199 |
| 1.122594 | 2.929454 | 2.253037 | 2.339711 |
| 0.676511 | 0.368378 | 0.389756 | 0.454227 |

|          |          |          |          |
|----------|----------|----------|----------|
| 65.96082 | 65.62557 | 64.25221 | 59.41756 |
| 8.844196 | 2.635604 | 3.174237 | 2.772106 |
| 1.438161 | 0.642291 | 0.670354 | 0.68324  |
| 84.83842 | 21.86489 | 19.51808 | 21.53769 |
| 23.12459 | 14.11428 | 14.22458 | 19.71286 |
| 0.823053 | 1.558897 | 2.131617 | 1.923826 |
| 8.168802 | 1.707369 | 2.186774 | 3.09962  |
| 0.584139 | 2.46602  | 1.429151 | 1.273298 |
| 1.274342 | 0.298263 | 0.489591 | 0.239684 |
| 1.83015  | 3.963638 | 5.567667 | 3.327581 |
| 2.308289 | 1.524865 | 2.077911 | 2.450319 |
| 112.4186 | 26.71758 | 27.26465 | 30.82814 |
| 9.189037 | 5.236047 | 4.43062  | 5.060287 |
| 3.453354 | 2.167616 | 2.566703 | 2.074818 |
| 33.22345 | 16.6551  | 16.46378 | 15.83875 |
| 0.576358 | 3.41848  | 3.486303 | 3.67156  |
| 9.868913 | 33.64322 | 34.33567 | 36.00916 |
| 0.851598 | 1.988771 | 1.722168 | 1.801625 |
| 5.688197 | 21.32191 | 19.73204 | 23.43605 |
| 0.234803 | 5.220841 | 4.101271 | 4.698743 |
| 0.503423 | 0.047627 | 0.066433 | 0        |
| 0.253594 | 0.665603 | 0.577485 | 0.934328 |
| 63.13257 | 28.37261 | 30.30918 | 34.45292 |
| 6.008043 | 13.35246 | 12.81376 | 13.36366 |
| 18.15735 | 9.177945 | 7.122251 | 8.410625 |
| 2.176825 | 0.569032 | 0.272941 | 0.375622 |
| 3.565526 | 13.04414 | 12.21127 | 14.53383 |
| 3.413237 | 13.41354 | 13.68598 | 15.87858 |
| 2.958411 | 11.79649 | 11.63123 | 11.47834 |
| 30.00398 | 64.77682 | 64.54261 | 61.72664 |
| 10.26314 | 4.266473 | 3.790659 | 3.272978 |
| 50.02234 | 30.108   | 29.37703 | 34.39018 |
| 3.123789 | 7.457729 | 7.94942  | 7.96705  |
| 2.909734 | 1.006361 | 0.324616 | 0.581433 |
| 10.42713 | 4.868265 | 5.120438 | 5.512866 |
| 324.8752 | 105.5148 | 105.1975 | 112.1747 |
| 0.061462 | 3.389863 | 2.708861 | 2.632746 |
| 8.429172 | 0.784694 | 1.420601 | 1.457417 |
| 0.668991 | 1.043981 | 1.450437 | 1.677669 |
| 28.92917 | 101.1381 | 97.19361 | 104.4268 |
| 0.136687 | 0.743256 | 0.738351 | 0.169333 |
| 6.872761 | 4.22052  | 2.665717 | 3.449045 |
| 3.168331 | 4.448405 | 4.757286 | 4.31242  |
| 0.318487 | 0.749614 | 0.824545 | 0.635921 |
| 11.29818 | 1.001821 | 1.019224 | 0.981928 |
| 4.884418 | 3.731513 | 3.164801 | 3.598935 |
| 1.47881  | 7.053939 | 8.236698 | 6.926327 |
| 1.979486 | 6.904047 | 6.568747 | 6.374888 |
| 13.08831 | 15.32821 | 14.48683 | 15.847   |
| 4.060084 | 14.76141 | 13.49418 | 13.77295 |
| 8.76693  | 13.89241 | 13.39761 | 12.60086 |

|          |          |          |          |
|----------|----------|----------|----------|
| 27.52045 | 9.771805 | 9.692569 | 10.29411 |
| 5.295727 | 2.124278 | 1.663983 | 1.10383  |
| 2.769763 | 7.389846 | 5.802481 | 5.840685 |
| 62.04864 | 23.39268 | 21.56273 | 22.38346 |
| 0.995433 | 0.475543 | 0.381836 | 0.549508 |
| 1220.187 | 248.9345 | 250.7386 | 258.9398 |
| 4.087883 | 8.8813   | 6.879772 | 7.32437  |
| 21.37681 | 128.6069 | 112.655  | 124.2401 |
| 4.145287 | 10.47224 | 8.668634 | 9.168728 |
| 97.96352 | 33.39457 | 32.9101  | 34.15958 |
| 80.51109 | 11.87637 | 10.20416 | 11.50704 |
| 1.7031   | 9.270922 | 9.762376 | 8.192176 |
| 0.174812 | 2.101998 | 2.420559 | 2.246128 |
| 2.211091 | 4.565818 | 3.764787 | 4.843758 |
| 6.021348 | 12.00485 | 12.49491 | 13.77944 |
| 0.764958 | 0.239042 | 0.268432 | 0.21769  |
| 114.4895 | 53.24689 | 52.15982 | 55.75996 |
| 42.41732 | 14.11807 | 12.04155 | 14.75796 |
| 1080.405 | 340.3398 | 326.4211 | 356.8212 |
| 6.926637 | 3.535322 | 3.113626 | 3.673349 |
| 9.837059 | 11.21017 | 13.80937 | 12.02942 |
| 14.19115 | 4.363793 | 5.361424 | 4.1436   |
| 5.636598 | 3.918405 | 4.43276  | 4.597945 |
| 19.1372  | 3.57135  | 3.025031 | 2.755081 |
| 44.2492  | 23.10074 | 19.90925 | 24.05394 |
| 1.576895 | 0.667344 | 0.429525 | 0.771728 |
| 2.079902 | 1.040042 | 1.262282 | 1.475433 |
| 22.97368 | 7.628339 | 8.690484 | 7.707592 |
| 0.277022 | 1.77354  | 2.382983 | 2.058444 |
| 0.033661 | 1.65369  | 2.037847 | 1.906795 |
| 2.180657 | 4.421063 | 4.002093 | 4.432563 |
| 1.596047 | 0.396529 | 0.555339 | 0.226321 |
| 0.264472 | 0.430466 | 0.707985 | 0.786472 |
| 1.002687 | 6.170142 | 5.627173 | 6.26343  |
| 2.421141 | 2.472389 | 2.60741  | 2.505    |
| 4.788408 | 12.90351 | 14.50535 | 14.16096 |
| 1.609962 | 6.879835 | 5.480436 | 6.328506 |
| 0.525513 | 0.344041 | 0.420273 | 0.354477 |
| 0.40955  | 4.60893  | 4.266037 | 4.741193 |
| 341.7856 | 116.0322 | 120.3657 | 127.4554 |
| 3.72876  | 9.328045 | 7.604854 | 7.334565 |
| 0.758252 | 0.254499 | 0.31201  | 0.132444 |
| 1.536397 | 7.99648  | 7.902876 | 9.950667 |
| 5.115411 | 1.231084 | 2.7077   | 2.306663 |
| 0.749408 | 3.425133 | 4.861546 | 3.657829 |
| 3.375048 | 4.87655  | 5.533159 | 7.054489 |
| 0.313575 | 0.086284 | 0.281737 | 0.175801 |
| 5.106055 | 2.773231 | 2.124414 | 2.780973 |
| 0        | 0.666376 | 0.595955 | 0.536141 |
| 0.56273  | 1.096467 | 1.985049 | 2.514252 |
| 3.27309  | 53.92756 | 49.00981 | 54.69756 |

|          |          |          |          |
|----------|----------|----------|----------|
| 4.85967  | 13.01548 | 14.21181 | 12.77107 |
| 65.12085 | 30.60063 | 32.79516 | 31.58065 |
| 1.681877 | 3.760167 | 4.116932 | 3.681252 |
| 6.314217 | 1.865342 | 1.229017 | 0.79585  |
| 2.430736 | 1.110267 | 0.946909 | 1.150186 |
| 14.78983 | 6.583755 | 7.080214 | 6.502223 |
| 0.460976 | 0.695902 | 0.523371 | 0.747709 |
| 17.53023 | 37.88657 | 38.25826 | 39.88646 |
| 0.973156 | 1.571489 | 2.576726 | 2.609004 |
| 0.873622 | 0.374102 | 0.915253 | 0.308804 |
| 13.24442 | 4.425709 | 4.459785 | 4.962665 |
| 22.58389 | 11.27524 | 11.96101 | 12.5492  |
| 2.6752   | 0.71132  | 1.012359 | 1.111317 |
| 32.8815  | 136.7026 | 123.0137 | 137.4222 |
| 9.18612  | 2.580372 | 3.220208 | 3.802747 |
| 9.941461 | 27.01659 | 28.40542 | 30.41613 |
| 3.646391 | 8.22008  | 7.50891  | 6.427408 |
| 0.385483 | 2.32708  | 3.050128 | 2.555964 |
| 0.384166 | 0.646766 | 1.174452 | 1.07817  |
| 152.497  | 182.373  | 177.6166 | 180.3611 |
| 3.828244 | 3.452259 | 3.224656 | 3.232366 |
| 0.862005 | 2.401003 | 1.899986 | 2.132361 |
| 17.73467 | 18.25747 | 18.41898 | 17.38345 |
| 13.82015 | 32.52939 | 44.38249 | 38.67941 |
| 4.958392 | 1.813637 | 2.740279 | 2.755336 |
| 4.139892 | 1.453757 | 0.969253 | 1.142215 |
| 6.821801 | 7.362579 | 9.043328 | 10.34692 |
| 3.978983 | 14.3803  | 14.36495 | 13.20197 |
| 2.162498 | 8.969434 | 10.51499 | 10.34727 |
| 0.933438 | 2.840993 | 2.374386 | 4.143236 |
| 4.814888 | 14.43397 | 14.09052 | 16.68608 |
| 43.34248 | 18.43577 | 18.6892  | 20.39817 |
| 4.590596 | 21.32943 | 20.51148 | 24.00666 |
| 8.185176 | 23.69164 | 23.52374 | 25.50486 |
| 1.596062 | 0.518555 | 0.700712 | 1.079967 |
| 0.834452 | 0.167311 | 0.191519 | 0.171227 |
| 21.10035 | 11.08321 | 9.838041 | 11.79016 |
| 36.31915 | 18.73771 | 19.17656 | 16.88604 |
| 0.966471 | 6.464575 | 5.423831 | 6.13435  |
| 2.463471 | 6.115697 | 4.833382 | 4.450101 |
| 0.727386 | 5.550169 | 5.014257 | 5.835059 |
| 1.67198  | 3.193483 | 3.508455 | 3.628215 |
| 3.018098 | 6.778332 | 6.896307 | 6.54611  |
| 4.403732 | 1.848547 | 2.559648 | 1.913643 |
| 5.545463 | 4.193382 | 3.523156 | 5.261662 |
| 9.834016 | 54.05112 | 60.94972 | 56.79148 |
| 98.03942 | 27.04377 | 24.28856 | 28.065   |
| 0.505519 | 0.715738 | 0.808263 | 0.737194 |
| 0.193235 | 0.976285 | 1.550112 | 1.592431 |
| 0        | 0.109102 | 0.057193 | 0.071758 |
| 176.5809 | 48.29168 | 53.10117 | 46.10419 |



|          |          |          |          |
|----------|----------|----------|----------|
| 12.10832 | 33.12095 | 30.63413 | 30.05374 |
| 36.2818  | 13.15025 | 12.97766 | 13.80086 |
| 3.30126  | 37.62563 | 37.73214 | 38.38224 |
| 8.515306 | 3.874376 | 3.9359   | 4.231288 |
| 59.78436 | 24.98284 | 23.41813 | 26.74805 |
| 16.70864 | 5.533082 | 4.995986 | 5.278    |
| 3.946005 | 39.20514 | 41.50757 | 40.52279 |
| 3.499699 | 10.27822 | 10.2174  | 9.911214 |
| 78.60563 | 6.945172 | 7.340403 | 6.529594 |
| 25.38094 | 93.28236 | 97.02358 | 93.84137 |
| 1.381461 | 1.011906 | 1.20256  | 1.24294  |
| 1.002552 | 2.785458 | 1.670492 | 3.203385 |
| 1.983589 | 4.704625 | 4.569535 | 5.22555  |
| 6.971465 | 9.057819 | 8.525293 | 9.457133 |
| 0.508739 | 7.831133 | 5.67038  | 4.936121 |
| 7.079826 | 14.57018 | 14.23857 | 14.32191 |
| 8.761589 | 9.44025  | 9.643016 | 9.614193 |
| 0.034443 | 11.6333  | 14.72815 | 13.55363 |
| 29.14885 | 14.00844 | 12.53447 | 11.25496 |
| 1.344482 | 4.933948 | 4.147565 | 4.260428 |
| 1.134724 | 3.881542 | 3.014297 | 2.063533 |
| 0.913691 | 0.136018 | 0.159872 | 0.340154 |
| 3.243836 | 1.679673 | 2.062675 | 1.954852 |
| 20.78515 | 6.584344 | 8.686122 | 7.73469  |
| 0.959824 | 1.551941 | 1.505087 | 2.530678 |
| 7.003679 | 28.71256 | 27.29788 | 30.75733 |
| 1.612098 | 5.698819 | 4.610746 | 4.719166 |
| 0.229582 | 2.330481 | 1.839928 | 2.403399 |
| 43.43822 | 17.65774 | 13.34296 | 17.8288  |
| 37.03109 | 13.18712 | 13.72177 | 14.05622 |
| 5.674902 | 15.58055 | 13.90697 | 12.60074 |
| 12.02661 | 10.28873 | 9.433803 | 9.773323 |
| 1.01466  | 0.528329 | 1.354206 | 1.468079 |
| 1.741123 | 11.61933 | 10.65773 | 11.40677 |
| 0.610284 | 1.218527 | 1.132745 | 1.065845 |
| 16.08199 | 22.60405 | 24.72715 | 24.23419 |
| 14.65033 | 5.97729  | 6.109994 | 6.647549 |
| 15.0465  | 7.835661 | 7.605604 | 9.165428 |
| 18.71448 | 3.826836 | 3.712838 | 5.87061  |
| 14.4844  | 51.73545 | 48.17151 | 52.38958 |
| 2.068174 | 5.996123 | 6.121283 | 5.719938 |
| 2.864642 | 7.319605 | 7.633169 | 10.67327 |
| 1.257667 | 3.827153 | 3.144175 | 3.520709 |
| 0.331965 | 1.370413 | 1.713675 | 1.220386 |
| 0.911201 | 0.397151 | 0.379893 | 0.489229 |
| 1.565698 | 1.151679 | 0.69876  | 1.543364 |
| 23.04936 | 8.017686 | 6.905801 | 6.718419 |
| 0.791864 | 1.619874 | 1.480178 | 1.398231 |
| 54.92055 | 25.00024 | 23.61291 | 28.35112 |
| 23.28511 | 7.689596 | 5.925555 | 6.141644 |
| 21.69324 | 75.52756 | 74.86752 | 81.75523 |

|          |          |          |          |
|----------|----------|----------|----------|
| 4.764144 | 2.587438 | 2.217793 | 1.952885 |
| 10.93707 | 4.257132 | 4.744066 | 3.411758 |
| 0.771315 | 1.175232 | 0.61957  | 1.272686 |
| 13.89792 | 4.826728 | 5.468269 | 5.116791 |
| 0.698208 | 2.457637 | 2.186655 | 2.825715 |
| 2.584219 | 7.34836  | 5.708977 | 7.137712 |
| 8.645755 | 6.525659 | 6.528493 | 6.332323 |
| 10.96522 | 2.679987 | 2.257061 | 2.646628 |
| 18.7328  | 9.373041 | 6.538913 | 9.386749 |
| 4.022095 | 4.587115 | 5.013669 | 4.182682 |
| 7.940416 | 0.56682  | 0.546956 | 0.439711 |
| 181.0472 | 94.68471 | 96.66335 | 98.97868 |
| 2.091882 | 1.222111 | 0.826465 | 1.209788 |
| 1.416289 | 0.715829 | 1.113613 | 1.168975 |
| 0.451886 | 4.922188 | 3.173    | 4.006268 |
| 5.837336 | 14.03128 | 10.96699 | 11.62881 |
| 23.30438 | 19.80176 | 18.94457 | 19.28027 |
| 7.841095 | 3.633136 | 3.941471 | 4.406845 |
| 1.444461 | 0.892755 | 0.714671 | 0.503257 |
| 48.47514 | 21.4245  | 20.93436 | 20.36273 |
| 3.283768 | 1.090523 | 1.047888 | 1.669201 |
| 2.109219 | 0.332368 | 0.849848 | 0.114935 |
| 21.57241 | 8.485733 | 8.207083 | 8.677625 |
| 0.557455 | 1.518803 | 1.275547 | 1.188962 |
| 6.856124 | 12.91107 | 11.62833 | 13.26597 |
| 4.158247 | 2.883312 | 3.492825 | 3.839578 |
| 5.757049 | 14.56108 | 13.82621 | 16.05219 |
| 117.31   | 48.1662  | 48.78624 | 47.20663 |
| 1.973404 | 5.703465 | 6.439453 | 6.756149 |
| 7.561517 | 4.250717 | 4.563408 | 3.738973 |
| 7.853976 | 3.992046 | 4.768643 | 4.501974 |
| 1.563342 | 4.786727 | 5.076459 | 3.946423 |
| 24.9908  | 28.15185 | 26.94061 | 28.6001  |
| 3.310552 | 5.325197 | 4.307735 | 5.184557 |
| 583.5589 | 223.9153 | 196.7475 | 216.6025 |
| 9.264835 | 4.254653 | 3.982654 | 4.790746 |
| 33.82226 | 14.96253 | 13.25587 | 15.20747 |
| 15.19709 | 0.042288 | 0.422753 | 0.314351 |
| 47.5886  | 16.75638 | 16.05187 | 16.0675  |
| 0.388694 | 1.448214 | 1.141129 | 1.479603 |
| 51.99297 | 112.0578 | 105.4801 | 115.0749 |
| 95.88079 | 181.7047 | 190.8694 | 193.1065 |
| 10.12644 | 6.970889 | 6.13257  | 7.581122 |
| 114.0567 | 39.26122 | 41.37957 | 40.44577 |
| 295.6941 | 106.9893 | 109.4406 | 108.4392 |
| 2.40128  | 13.00953 | 12.37802 | 12.5223  |
| 273.0631 | 92.11208 | 92.1297  | 92.71693 |
| 1.780878 | 3.04166  | 3.227907 | 2.89337  |
| 4.854425 | 1.946249 | 2.049773 | 2.371449 |
| 1.510002 | 7.908363 | 8.915386 | 9.998793 |
| 4.035422 | 19.66491 | 18.08634 | 18.99366 |

|          |          |          |          |
|----------|----------|----------|----------|
| 2.671526 | 16.36194 | 17.51377 | 17.98756 |
| 375.3279 | 195.8951 | 188.4249 | 201.78   |
| 6.554046 | 2.012957 | 2.125954 | 3.527634 |
| 0.393718 | 1.552708 | 1.403392 | 1.091705 |
| 7.757299 | 5.963609 | 4.995938 | 6.570932 |
| 0.138213 | 4.07979  | 3.763078 | 3.360349 |
| 0.964972 | 4.410366 | 3.972374 | 4.079286 |
| 6.996531 | 2.639682 | 2.889367 | 3.459682 |
| 3.729553 | 2.884291 | 2.403897 | 2.594203 |
| 35.92773 | 11.60231 | 14.33065 | 10.76438 |
| 11.19256 | 27.36484 | 30.27968 | 28.33104 |
| 10.75437 | 4.653938 | 5.572924 | 5.227979 |
| 8.454734 | 3.913065 | 4.90752  | 3.976859 |
| 15.53964 | 7.951577 | 8.781291 | 8.714651 |
| 1.506357 | 5.787891 | 4.065287 | 4.617839 |
| 2.528746 | 59.50414 | 64.20535 | 65.07078 |
| 1.383665 | 2.06103  | 1.723363 | 1.926452 |
| 1.405521 | 2.266211 | 2.706489 | 2.305232 |
| 48.65593 | 47.33741 | 51.54499 | 52.06287 |
| 2.441785 | 21.18252 | 22.14692 | 25.43668 |
| 0.249841 | 1.011547 | 1.027777 | 1.431392 |
| 33.70012 | 23.90447 | 22.68745 | 25.63577 |
| 10.77089 | 4.736041 | 5.212306 | 5.221683 |
| 5.403462 | 2.014318 | 3.302781 | 1.701076 |
| 0.321369 | 0.522726 | 0.322222 | 0.366445 |
| 1.716261 | 0.627362 | 0.638891 | 1.432647 |
| 0.351321 | 0.217506 | 0.372235 | 0.504137 |
| 56.63817 | 39.56336 | 35.71599 | 39.58249 |
| 52.79696 | 20.2521  | 18.16061 | 18.06676 |
| 9.737442 | 43.31897 | 42.53817 | 44.50405 |
| 7.984094 | 31.40962 | 31.26203 | 32.02795 |
| 0.493355 | 0.51415  | 0.283704 | 0.492421 |
| 49.73388 | 24.56022 | 25.53802 | 26.98783 |
| 16.19576 | 31.65619 | 29.80731 | 29.99966 |
| 2.659493 | 15.24941 | 15.25864 | 15.07967 |
| 52.25311 | 22.85512 | 21.78938 | 23.08862 |
| 53.86432 | 146.0186 | 146.9523 | 149.6275 |
| 96.24537 | 41.11195 | 39.98635 | 42.44062 |
| 3.239655 | 1.455236 | 1.658378 | 1.869006 |
| 1.475068 | 1.381638 | 1.405846 | 1.346766 |
| 0.287741 | 21.75541 | 22.1973  | 17.48724 |
| 5.551006 | 16.47275 | 15.29528 | 18.8612  |
| 8.307458 | 22.14006 | 23.98195 | 24.2203  |
| 24.86075 | 9.848325 | 9.740024 | 11.07319 |
| 0.396066 | 1.29128  | 1.214777 | 1.060489 |
| 499.8324 | 1069.412 | 1074.399 | 1088.707 |
| 1.43774  | 15.15027 | 14.23326 | 15.23587 |
| 10.89655 | 2.238507 | 2.27415  | 2.49307  |
| 52.2675  | 25.69344 | 26.02003 | 25.28416 |
| 0.970613 | 3.056493 | 3.929467 | 3.830675 |
| 18.26979 | 5.929162 | 5.512455 | 5.812226 |

|          |          |          |          |
|----------|----------|----------|----------|
| 12.08616 | 27.81501 | 26.17627 | 27.45422 |
| 6.264623 | 3.02452  | 1.98474  | 2.010612 |
| 5.778337 | 17.11407 | 15.20891 | 16.02038 |
| 23.64357 | 5.168664 | 5.633335 | 6.398302 |
| 4.529387 | 3.513931 | 3.223418 | 3.256809 |
| 55.77047 | 28.29792 | 28.78877 | 28.68121 |
| 1.947498 | 15.53583 | 16.98268 | 16.68272 |
| 7.68243  | 15.7315  | 16.00457 | 16.4842  |
| 6.480068 | 4.262267 | 2.425676 | 1.790802 |
| 97.70853 | 13.65467 | 13.3325  | 14.05092 |
| 11.85418 | 11.03833 | 10.70624 | 13.46013 |
| 4.310537 | 2.390135 | 2.227514 | 2.383416 |
| 256.0491 | 89.90107 | 92.81094 | 96.82234 |
| 14.89734 | 5.926317 | 5.011626 | 4.750309 |
| 6.153918 | 3.562316 | 4.558434 | 4.194576 |
| 27.53063 | 14.33792 | 14.73196 | 14.92363 |
| 23.66636 | 7.865385 | 8.844673 | 7.465332 |
| 0.92321  | 10.47948 | 9.55474  | 11.46379 |
| 101.2643 | 39.88149 | 40.70934 | 38.35157 |
| 0.366891 | 2.437838 | 2.153507 | 2.578261 |
| 2.155554 | 2.675164 | 1.52757  | 1.884576 |
| 0.75023  | 12.1791  | 11.75249 | 13.64168 |
| 5.372056 | 2.234763 | 2.540544 | 2.318505 |
| 1.417026 | 0.300555 | 0.316099 | 0.223596 |
| 14.40866 | 3.944897 | 4.025114 | 3.732951 |
| 136.762  | 66.94846 | 69.3747  | 75.83187 |
| 573.6515 | 95.48549 | 92.60959 | 98.37518 |
| 4.113881 | 5.560774 | 6.093988 | 5.453179 |
| 1.407612 | 9.521782 | 10.34886 | 14.11541 |
| 36.70472 | 94.03698 | 100.3531 | 106.6269 |
| 3.306348 | 6.570687 | 7.187268 | 8.452337 |
| 52.44233 | 16.22852 | 14.73187 | 17.13701 |
| 2.417949 | 9.407375 | 8.78459  | 8.961782 |
| 5.644587 | 10.04336 | 10.4063  | 12.03813 |
| 2.989067 | 0.81073  | 1.223686 | 1.610127 |
| 43.42205 | 89.32485 | 85.93521 | 90.90728 |
| 0.717721 | 25.64329 | 25.39878 | 28.20055 |
| 14.69586 | 10.82018 | 12.40171 | 13.71764 |
| 22.19553 | 45.43049 | 45.27091 | 45.36552 |
| 131.47   | 34.71693 | 34.90543 | 33.71588 |
| 17.33376 | 52.06036 | 52.2537  | 53.93883 |
| 3.740816 | 12.20762 | 9.518074 | 12.56169 |
| 33.36837 | 170.0625 | 161.5865 | 173.9882 |
| 0        | 0.76963  | 0.48623  | 0.994221 |
| 2.039438 | 3.305624 | 1.863825 | 2.666305 |
| 138.0874 | 67.91492 | 70.40563 | 69.80035 |
| 15.24472 | 6.1466   | 5.698783 | 5.094372 |
| 3.414357 | 7.049474 | 6.836223 | 8.641054 |
| 4.856738 | 0.629079 | 0.957782 | 0.953482 |
| 12.22566 | 7.882356 | 8.414111 | 8.944036 |
| 5.612789 | 16.76753 | 16.33451 | 15.81234 |

|          |          |          |          |
|----------|----------|----------|----------|
| 8.608728 | 8.256506 | 6.746634 | 6.609803 |
| 1.695584 | 6.194437 | 5.367992 | 4.51529  |
| 10.42318 | 3.845456 | 3.55476  | 3.088526 |
| 0.529978 | 1.407455 | 1.19089  | 1.524872 |
| 3.9412   | 2.570346 | 3.160102 | 3.763103 |
| 1.002076 | 0.95202  | 2.361658 | 3.228253 |
| 53.9678  | 33.88673 | 33.28499 | 35.63003 |
| 1.307435 | 0.873606 | 0.633485 | 0.461049 |
| 7.174046 | 3.285261 | 2.912175 | 3.688118 |
| 562.0723 | 164.2461 | 159.0871 | 161.636  |
| 3.927194 | 55.42378 | 57.12314 | 54.4639  |
| 5.316659 | 11.73124 | 12.61515 | 13.68698 |
| 13.60893 | 1.584889 | 2.195247 | 1.763217 |
| 2.110842 | 1.002395 | 0.87423  | 0.95392  |
| 7.920122 | 3.60215  | 3.893822 | 3.885818 |
| 53.02056 | 22.24981 | 25.19529 | 25.93711 |
| 2.645967 | 9.209923 | 10.49617 | 8.151383 |
| 1.292743 | 4.144613 | 4.85796  | 4.350078 |
| 71.00609 | 37.03574 | 36.36936 | 37.73945 |
| 13.49438 | 19.76226 | 22.5485  | 21.19855 |
| 33.92539 | 65.25731 | 63.69144 | 68.92847 |
| 0.393584 | 2.71259  | 3.423661 | 3.377936 |
| 26.0804  | 13.03213 | 9.986728 | 13.27659 |
| 0.052849 | 0.191885 | 0.293825 | 0.576045 |
| 2.337264 | 1.281646 | 1.229601 | 0.942677 |
| 1.489575 | 8.906569 | 7.923005 | 8.296313 |
| 1.617516 | 0.34967  | 0.440613 | 0.552011 |
| 2.260949 | 0.080721 | 0.168246 | 0        |
| 172.2994 | 82.82087 | 77.57394 | 83.67691 |
| 31.00612 | 67.82514 | 64.43472 | 68.76005 |
| 212.1105 | 100.3323 | 95.07127 | 106.4725 |
| 57.84342 | 26.12309 | 28.05724 | 25.20039 |
| 10.0696  | 33.41345 | 34.14046 | 33.88032 |
| 5.981375 | 15.85358 | 13.65165 | 14.46591 |
| 2.836632 | 13.63101 | 15.11311 | 13.4141  |
| 0.094134 | 0.476096 | 0.463819 | 0.371004 |
| 3.829826 | 9.898834 | 9.321357 | 10.3979  |
| 4.05474  | 10.4356  | 10.59821 | 12.07074 |
| 1.162455 | 2.394134 | 2.446994 | 2.414152 |
| 1.812506 | 2.612682 | 2.45917  | 2.299309 |
| 0.302622 | 2.168658 | 2.215307 | 2.343251 |
| 33.27383 | 11.38161 | 10.5306  | 11.07526 |
| 2424.674 | 741.9664 | 708.605  | 771.2434 |
| 0.457652 | 2.173179 | 2.225824 | 1.835388 |
| 0.553369 | 1.401715 | 1.509527 | 2.025371 |
| 2.828819 | 6.903423 | 7.325514 | 7.249478 |
| 19.54223 | 43.9097  | 46.20153 | 50.47723 |
| 5.792489 | 5.724061 | 6.641922 | 5.849568 |
| 5.200447 | 12.70963 | 10.09301 | 11.44415 |
| 0.481442 | 1.070403 | 0.847297 | 1.167624 |
| 36.5489  | 15.99749 | 10.61356 | 13.31189 |

|          |          |          |          |
|----------|----------|----------|----------|
| 2.325672 | 49.48405 | 46.14583 | 53.86309 |
| 3.015728 | 14.05885 | 13.60784 | 13.6506  |
| 68.39329 | 23.96923 | 23.04043 | 24.42691 |
| 10.62072 | 10.63975 | 11.43686 | 11.06355 |
| 8.92885  | 2.931888 | 3.292173 | 3.379266 |
| 12.27452 | 12.69277 | 14.57155 | 14.36525 |
| 19.27214 | 7.47373  | 8.284011 | 8.22074  |
| 1.892987 | 0.431394 | 0.408488 | 0.318754 |
| 0.896436 | 8.807967 | 8.540644 | 9.905627 |
| 24.74835 | 11.82486 | 15.73377 | 12.93486 |
| 0.482245 | 1.517756 | 2.206291 | 1.392555 |
| 1.675669 | 15.66578 | 15.74015 | 18.03824 |
| 0.910467 | 7.458385 | 7.879467 | 7.817338 |
| 13.47151 | 6.218339 | 5.901314 | 5.920945 |
| 0        | 0.964146 | 1.683439 | 1.142748 |
| 3.678797 | 17.10628 | 14.53694 | 19.6143  |
| 1.549735 | 13.86849 | 14.61469 | 14.47417 |
| 5.32256  | 65.89421 | 65.09638 | 71.56053 |
| 1.679901 | 4.578615 | 5.358387 | 4.450618 |
| 5.106002 | 20.41039 | 21.26496 | 25.16754 |
| 194.1483 | 82.01235 | 85.96162 | 90.54593 |
| 3.817612 | 10.28826 | 8.90548  | 11.1887  |
| 3.942056 | 1.162717 | 1.659284 | 1.619916 |
| 15.05508 | 9.236285 | 8.013761 | 8.669714 |
| 803.9895 | 253.1666 | 254.6566 | 265.27   |
| 56.87578 | 27.94524 | 26.71986 | 26.14854 |
| 2.483274 | 3.921163 | 4.471324 | 4.944018 |
| 2.206734 | 0.566159 | 0.940608 | 1.65272  |
| 20.6922  | 19.87777 | 18.94873 | 20.76559 |
| 121.0591 | 60.59216 | 63.25555 | 61.41787 |
| 0.383089 | 13.77833 | 13.46639 | 15.75534 |
| 7.397932 | 12.78172 | 13.85207 | 14.35088 |
| 1.549205 | 0.434966 | 0.585462 | 0.563038 |
| 1.408435 | 8.934603 | 9.412992 | 10.67057 |
| 48.45232 | 179.5798 | 179.8296 | 173.1594 |
| 2.336249 | 5.577229 | 5.729056 | 6.329389 |
| 1.845947 | 4.43512  | 4.786323 | 4.585452 |
| 9.717346 | 4.314538 | 3.973213 | 3.638088 |
| 7.133012 | 7.94876  | 7.624905 | 7.160582 |
| 31.2654  | 16.79481 | 16.56093 | 16.58301 |
| 8.014206 | 16.02001 | 14.73643 | 17.63311 |
| 0.967646 | 2.449597 | 2.248105 | 2.578469 |
| 5.9387   | 17.86208 | 16.64364 | 18.63099 |
| 2.124745 | 1.633652 | 1.762598 | 1.939904 |
| 82.27973 | 30.46989 | 31.19469 | 31.8024  |
| 24.65812 | 10.49914 | 11.54174 | 11.11727 |
| 101.4274 | 65.70699 | 62.46792 | 73.63097 |
| 37.96927 | 75.88912 | 69.02021 | 70.97086 |
| 2.805893 | 11.40168 | 12.07265 | 13.35533 |
| 46.60101 | 19.55565 | 19.50935 | 18.07864 |
| 27.69862 | 23.253   | 23.40851 | 24.32422 |

|          |          |          |          |
|----------|----------|----------|----------|
| 1.791844 | 3.056053 | 1.925306 | 2.807411 |
| 3.557225 | 9.556047 | 8.984096 | 10.41661 |
| 0.863431 | 1.521379 | 1.365809 | 1.881205 |
| 0.999309 | 4.359725 | 3.845646 | 4.142918 |
| 0.536843 | 1.220625 | 1.064976 | 0.945539 |
| 0.688186 | 3.334047 | 3.273486 | 3.388074 |
| 1.721926 | 2.298446 | 2.374628 | 2.499064 |
| 6.393471 | 3.250524 | 2.857755 | 3.253005 |
| 7.219027 | 30.8908  | 32.00642 | 33.0126  |
| 9.501412 | 5.629553 | 4.997387 | 4.251018 |
| 6.223032 | 6.460043 | 6.302694 | 7.770421 |
| 132.3213 | 31.71439 | 31.23731 | 39.06552 |
| 941.7108 | 123.3199 | 120.7416 | 126.2962 |
| 22.88672 | 4.284166 | 2.946491 | 3.638382 |
| 1.255679 | 0.57079  | 0.372286 | 0.256991 |
| 30.2558  | 16.9118  | 18.7636  | 17.63746 |
| 19.16297 | 2.964181 | 2.726951 | 2.156235 |
| 83.31232 | 5.455268 | 5.107226 | 4.96428  |
| 1.714775 | 5.537937 | 5.231987 | 5.311473 |
| 212.7778 | 429.8734 | 421.014  | 429.1237 |
| 8.932304 | 17.50149 | 15.14062 | 16.89631 |
| 28.81312 | 10.14002 | 11.18735 | 9.999938 |
| 94.63953 | 27.15822 | 25.76576 | 28.87814 |
| 4.577651 | 0.693216 | 1.108488 | 0.647822 |
| 6.100417 | 3.725728 | 3.094916 | 3.033643 |
| 6.032407 | 3.502356 | 2.834862 | 2.908539 |
| 72.5228  | 46.90036 | 44.137   | 45.56774 |
| 6.286091 | 2.849538 | 2.507444 | 2.72313  |
| 4.758121 | 2.225984 | 2.48321  | 2.641369 |
| 0.953841 | 0.137612 | 0.379423 | 0.376718 |
| 65.57669 | 52.39259 | 47.87314 | 51.65529 |
| 8.702245 | 3.67529  | 4.93462  | 3.928421 |
| 1.609534 | 2.666914 | 2.909206 | 2.606769 |
| 1.176392 | 4.831224 | 4.942908 | 4.11954  |
| 2.62341  | 3.865151 | 3.820073 | 4.311447 |
| 0.801824 | 3.32083  | 2.332791 | 3.314306 |
| 4.333414 | 7.174563 | 7.003941 | 7.38328  |
| 9.41315  | 15.99728 | 13.1236  | 15.57099 |
| 26.24041 | 5.86752  | 4.46017  | 6.120336 |
| 2.946227 | 14.98833 | 13.46307 | 12.53936 |
| 31.11358 | 0.729163 | 0.747215 | 0.974706 |
| 0.396818 | 0.293533 | 0.291274 | 0.410952 |
| 5.008976 | 12.73053 | 11.54735 | 10.50301 |
| 17.88423 | 58.20505 | 47.56116 | 50.96572 |
| 0.08135  | 0.956181 | 0.991946 | 1.105127 |
| 7.743418 | 43.0138  | 43.22027 | 47.08806 |
| 0        | 0        | 0        | 0        |
| 5.068453 | 3.557725 | 2.837047 | 3.287756 |
| 0.979288 | 4.645261 | 5.156014 | 4.017537 |
| 0.633893 | 0.531735 | 0.444225 | 0.68073  |
| 36.76519 | 97.45616 | 102.8427 | 103.057  |

|          |          |          |          |
|----------|----------|----------|----------|
| 6.954048 | 18.98764 | 17.5155  | 19.86056 |
| 1.886834 | 0.441229 | 0.478451 | 0.453396 |
| 214.7604 | 138.1864 | 126.4835 | 145.1386 |
| 453.5847 | 760.973  | 792.0234 | 811.6923 |
| 6.501709 | 0        | 0        | 0        |
| 65.91339 | 23.11604 | 25.42439 | 24.11448 |
| 1.769033 | 1.013472 | 0.963574 | 0.985734 |
| 0.135109 | 2.128969 | 2.061749 | 2.283689 |
| 3.216201 | 10.63923 | 10.74621 | 12.08715 |
| 25.81847 | 8.225534 | 8.35046  | 7.705577 |
| 0.550488 | 1.25324  | 1.069488 | 1.118867 |
| 73.51553 | 31.62509 | 28.48275 | 30.01788 |
| 850.0037 | 109.4694 | 72.67092 | 124.2222 |
| 0.680711 | 0.386641 | 0.157411 | 0.268035 |
| 2.968919 | 8.16695  | 9.314487 | 6.557271 |
| 1.038662 | 3.354033 | 4.413566 | 2.964607 |
| 7.433295 | 21.93192 | 19.16386 | 19.72253 |
| 25.57589 | 14.77424 | 13.42725 | 13.33733 |
| 0.999916 | 0.317644 | 0.449093 | 0.340217 |
| 9.760379 | 5.193455 | 5.102655 | 6.037628 |
| 5.836101 | 3.76039  | 2.725173 | 2.95549  |
| 17.37822 | 7.878414 | 8.164484 | 8.553732 |
| 60.93441 | 26.71804 | 25.3446  | 24.4092  |
| 0.647837 | 0.839292 | 0.960709 | 0.832962 |
| 3.110449 | 14.77536 | 11.68561 | 13.10857 |
| 5.080909 | 3.241105 | 2.455577 | 4.124941 |
| 10.95869 | 6.331144 | 4.933361 | 6.233872 |
| 1.992585 | 2.858176 | 2.058473 | 2.049383 |
| 2.441642 | 14.92209 | 14.661   | 15.02934 |
| 21.47852 | 49.52118 | 44.96777 | 50.18985 |
| 4.559486 | 4.306829 | 3.891969 | 5.295192 |
| 1.899009 | 2.578805 | 3.432731 | 3.786864 |
| 19.62201 | 9.056885 | 9.158982 | 10.34293 |
| 1.100279 | 2.169122 | 3.046816 | 2.020787 |
| 3.215551 | 8.711869 | 8.39829  | 8.611846 |
| 23.06229 | 11.431   | 9.68161  | 11.38212 |
| 4.44741  | 6.998239 | 6.768463 | 7.357855 |
| 14.57762 | 28.00819 | 22.6918  | 26.11595 |
| 9.780352 | 24.0309  | 22.55969 | 21.64529 |
| 1.018122 | 4.216341 | 3.429958 | 4.474535 |
| 0.483798 | 0.289153 | 0.160266 | 0.091848 |
| 85.30624 | 1.940796 | 1.475408 | 2.077944 |
| 1.476753 | 3.411659 | 2.458455 | 3.682849 |
| 2.9887   | 14.57976 | 12.01235 | 15.14219 |
| 41.74834 | 17.94927 | 16.14969 | 18.01149 |
| 35.74328 | 4.368825 | 4.778349 | 4.597553 |
| 50.05808 | 156.1335 | 151.5185 | 160.7916 |
| 0        | 0.888717 | 0.83318  | 0.501044 |
| 8.488419 | 16.5372  | 17.7604  | 19.94242 |
| 6.452951 | 8.446728 | 7.112707 | 8.672698 |
| 0.652793 | 1.552506 | 1.289159 | 1.752526 |



|          |          |          |          |
|----------|----------|----------|----------|
| 61.33309 | 32.86441 | 30.22575 | 33.15156 |
| 4.809469 | 63.60955 | 60.66986 | 65.92436 |
| 0.337407 | 1.240895 | 1.996496 | 1.761318 |
| 10.97961 | 7.539648 | 9.593872 | 8.604138 |
| 29.74341 | 15.42127 | 13.91422 | 14.4132  |
| 18.34461 | 8.030158 | 7.101958 | 7.795614 |
| 14.30902 | 36.33274 | 35.92698 | 40.28996 |
| 1.681459 | 1.024666 | 0.882421 | 1.20623  |
| 654.3119 | 75.41229 | 74.3179  | 75.34762 |
| 14.17499 | 21.54376 | 20.05674 | 22.23083 |
| 4.708193 | 30.98239 | 31.10866 | 31.86673 |
| 2.968369 | 3.689093 | 4.354896 | 5.043201 |
| 48.47239 | 209.8725 | 212.6274 | 212.918  |
| 3.746348 | 35.11995 | 41.71856 | 38.29871 |
| 2.307934 | 14.11384 | 13.11457 | 14.84357 |
| 22.33725 | 11.39286 | 11.46256 | 11.73869 |
| 50.74911 | 8.066572 | 7.482541 | 7.965854 |
| 4.552874 | 2.165736 | 2.235123 | 1.988647 |
| 4.444444 | 2.256721 | 1.998833 | 2.194599 |
| 0.260611 | 0.895667 | 1.548907 | 1.381805 |
| 11.1103  | 5.471991 | 5.397037 | 5.272222 |
| 46.35203 | 21.56403 | 22.0497  | 24.97032 |
| 23.89066 | 12.74609 | 11.20451 | 9.295013 |
| 21.6935  | 8.303851 | 7.350082 | 7.7463   |
| 0.079192 | 4.441315 | 4.696886 | 6.057129 |
| 11.57171 | 9.169479 | 9.940243 | 8.409565 |
| 12.12091 | 3.461116 | 3.822314 | 3.540676 |
| 4.161861 | 2.082539 | 1.951957 | 2.899053 |
| 6.525462 | 1.570583 | 1.520178 | 1.745597 |
| 1.647202 | 1.022991 | 0.550101 | 0.720728 |
| 8.047111 | 17.43297 | 18.38525 | 17.34711 |
| 0.39527  | 2.035951 | 2.679235 | 2.260336 |
| 0.84151  | 3.27546  | 2.706878 | 3.080364 |
| 7.058183 | 2.559688 | 2.958871 | 2.817914 |
| 2.712147 | 1.093547 | 0.494558 | 1.178002 |
| 0.008503 | 0.062132 | 0        | 0.20203  |
| 6.577935 | 13.55906 | 12.06142 | 13.78937 |
| 3.401163 | 48.05695 | 49.32085 | 52.40494 |
| 17.50442 | 3.029724 | 3.076045 | 3.34767  |
| 374.2349 | 202.654  | 182.4326 | 201.959  |
| 17.2762  | 43.77005 | 41.28025 | 42.89644 |
| 0.389338 | 1.233273 | 0.990108 | 1.097269 |
| 29.50143 | 2.147104 | 2.450891 | 2.50898  |
| 15.7746  | 6.705878 | 5.141044 | 4.893168 |
| 9.651011 | 5.60784  | 8.326436 | 6.222075 |
| 5.500814 | 43.789   | 44.95993 | 44.03321 |
| 161.3411 | 68.85049 | 77.46073 | 72.44492 |
| 2.519233 | 0.33996  | 0.322223 | 0.346775 |
| 3.486501 | 7.154138 | 6.454885 | 7.360736 |
| 0.132172 | 0.99064  | 0.974002 | 1.410433 |
| 17.91485 | 4.442965 | 6.427504 | 7.276668 |

|          |          |          |          |
|----------|----------|----------|----------|
| 1.454912 | 4.59993  | 4.661599 | 3.961731 |
| 2.721268 | 8.650345 | 5.997664 | 8.299714 |
| 544.4792 | 235.7776 | 225.2118 | 240.0022 |
| 39.91005 | 13.08808 | 13.85069 | 12.96204 |
| 2.25792  | 1.928716 | 1.927517 | 1.587057 |
| 3.516362 | 1.651484 | 1.515636 | 1.371652 |
| 108.7366 | 27.46323 | 27.21769 | 27.24591 |
| 60.09414 | 19.28135 | 16.88855 | 18.39669 |
| 18.06785 | 57.73908 | 57.93667 | 62.07308 |
| 0        | 0.658763 | 0.574129 | 0.580192 |
| 2.523345 | 6.820861 | 5.554775 | 6.5539   |
| 0.436884 | 2.779652 | 2.515436 | 3.044659 |
| 70.97031 | 38.49022 | 38.50937 | 39.67768 |
| 27.20894 | 13.07452 | 13.50755 | 14.61512 |
| 0.508062 | 3.341925 | 3.78032  | 4.475085 |
| 2.315134 | 1.295006 | 1.193243 | 1.28848  |
| 3.317116 | 1.329374 | 1.847197 | 1.260946 |
| 0.12082  | 0.609561 | 0.347329 | 0.52201  |
| 499.0515 | 58.05109 | 61.76007 | 57.90878 |
| 3.614925 | 5.000875 | 4.941044 | 4.968347 |
| 18.77598 | 3.743638 | 4.46286  | 4.222653 |
| 1.633733 | 1.188393 | 0.632443 | 0.439167 |
| 0.972138 | 8.913915 | 7.462169 | 6.8967   |
| 0.129231 | 5.342842 | 3.715788 | 4.257663 |
| 0.788069 | 4.398293 | 4.271569 | 4.173334 |
| 37.31606 | 148.481  | 141.249  | 150.973  |
| 25.35952 | 65.46329 | 60.68055 | 63.10912 |
| 3.720984 | 18.95499 | 16.0659  | 17.47955 |
| 0.908407 | 0.589594 | 0.464295 | 0.496369 |
| 17.71825 | 49.90787 | 50.18013 | 50.7319  |
| 8.586409 | 27.97011 | 25.78411 | 26.46534 |
| 5.127305 | 9.361431 | 9.06483  | 9.553451 |
| 4.912764 | 7.369471 | 9.982903 | 8.371685 |
| 64.31099 | 31.5945  | 33.97919 | 30.2056  |
| 22.21852 | 4.119298 | 4.807232 | 4.704273 |
| 9.967946 | 25.72576 | 22.05433 | 24.4749  |
| 24.61178 | 12.6911  | 13.23394 | 11.49772 |
| 18.52029 | 38.82433 | 39.6257  | 43.91738 |
| 0.231416 | 0.855072 | 0.792583 | 0.931119 |
| 9.745341 | 4.566096 | 4.415206 | 5.774102 |
| 23.12389 | 9.769985 | 10.33983 | 10.34225 |
| 6.872536 | 11.30195 | 11.28899 | 12.5448  |
| 0.941004 | 3.956282 | 3.265583 | 3.271148 |
| 68.12338 | 32.71167 | 30.66006 | 32.70177 |
| 1.249414 | 13.68853 | 13.10878 | 12.09093 |
| 3.385694 | 8.894423 | 8.595452 | 9.522358 |
| 11.65166 | 37.27929 | 36.86936 | 39.35912 |
| 4.795583 | 9.574448 | 3.96164  | 5.956246 |
| 251.6196 | 67.98903 | 68.3663  | 72.28307 |
| 42.16742 | 578.3973 | 552.4818 | 518.9319 |
| 0        | 0        | 0.114392 | 0.143588 |

|          |          |          |          |
|----------|----------|----------|----------|
| 0.619306 | 0.430062 | 0.764598 | 0.492396 |
| 15.33066 | 3.521266 | 3.714427 | 3.403226 |
| 4.08902  | 1.234339 | 1.270875 | 1.223701 |
| 0.095674 | 5.072133 | 2.652275 | 3.81935  |
| 8.684641 | 19.01786 | 18.78488 | 20.8185  |
| 0.370545 | 1.501706 | 1.686459 | 1.808157 |
| 17.32621 | 19.09733 | 15.94621 | 16.41533 |
| 1.077652 | 2.890174 | 2.71614  | 2.350438 |
| 0.554585 | 2.14466  | 2.186669 | 1.631873 |
| 0.332903 | 0.094377 | 0.219704 | 0.175869 |
| 15.22503 | 9.113266 | 9.117565 | 9.374323 |
| 3.47212  | 8.10764  | 8.627784 | 8.682106 |
| 15.68312 | 1.545428 | 1.319792 | 1.764068 |
| 410.3361 | 415.8286 | 402.0161 | 436.0797 |
| 0.903986 | 1.461689 | 1.169093 | 0.919072 |
| 3.044693 | 6.159667 | 7.917567 | 7.506951 |
| 21.21634 | 83.8185  | 81.2611  | 84.64283 |
| 4.136511 | 1.939368 | 2.117647 | 2.906909 |
| 20.83742 | 10.84677 | 10.71899 | 10.45643 |
| 7.842731 | 3.731347 | 4.285477 | 4.800958 |
| 0.290222 | 0.1094   | 0.115607 | 0.207814 |
| 1.353625 | 0.22029  | 0.435722 | 0.498648 |
| 19.99356 | 6.795785 | 6.878003 | 7.632634 |
| 0.490946 | 0.273546 | 0.064569 | 0.11678  |
| 6.109107 | 21.91309 | 18.76252 | 19.52035 |
| 2.740824 | 7.663778 | 7.837693 | 8.387952 |
| 127.294  | 35.93086 | 34.92773 | 37.36017 |
| 0.770396 | 0.105587 | 0.228382 | 0.177812 |
| 11.45889 | 28.29401 | 32.57165 | 32.42409 |
| 13.66475 | 0.815437 | 0.952085 | 0.639623 |
| 92.04125 | 28.42643 | 25.60529 | 27.22775 |
| 4.39028  | 2.738484 | 1.84784  | 2.858192 |
| 19.87114 | 7.032279 | 9.312664 | 8.405348 |
| 14.68808 | 5.728702 | 6.301445 | 7.236695 |
| 3.614379 | 11.55248 | 11.92196 | 11.34261 |
| 0.395063 | 4.196846 | 3.351715 | 3.175361 |
| 9.457798 | 3.947626 | 3.698151 | 3.622398 |
| 35.75819 | 13.37954 | 13.27237 | 14.27824 |
| 3.02316  | 9.593809 | 8.415329 | 9.572667 |
| 0.661748 | 3.512929 | 4.570096 | 2.969261 |
| 58.10664 | 27.77022 | 26.94217 | 28.91011 |
| 25.35631 | 31.8208  | 33.07571 | 34.00477 |
| 0.241325 | 2.339543 | 1.960953 | 2.097449 |
| 16.33254 | 5.560106 | 5.597225 | 5.899675 |
| 7.039175 | 15.31984 | 12.15312 | 13.95224 |
| 5.274353 | 10.23122 | 8.970929 | 10.40681 |
| 5.584092 | 6.089511 | 5.796507 | 6.186781 |
| 0.980645 | 2.27321  | 1.914224 | 2.2965   |
| 21.71171 | 11.8074  | 12.22534 | 10.47037 |
| 0.939943 | 1.178257 | 1.206774 | 1.480375 |
| 14.30804 | 7.29134  | 6.427717 | 7.06111  |

|          |          |          |          |
|----------|----------|----------|----------|
| 0.219188 | 1.434272 | 2.111612 | 2.486482 |
| 0        | 4.230701 | 3.128832 | 2.911648 |
| 0        | 3.666983 | 6.410019 | 4.188507 |
| 16.88795 | 16.60509 | 16.40187 | 15.72916 |
| 4.505993 | 7.858421 | 8.123116 | 8.648404 |
| 19.90847 | 38.6132  | 36.20759 | 41.04707 |
| 4.671838 | 3.821846 | 2.180355 | 2.092258 |
| 90.05009 | 40.79002 | 39.88596 | 41.22453 |
| 34.23147 | 3.657716 | 3.762612 | 4.447027 |
| 1.791525 | 2.269858 | 2.614849 | 1.77488  |
| 0.539319 | 135.4255 | 144.7906 | 142.1037 |
| 1.746872 | 5.805273 | 5.463999 | 5.479995 |
| 2.145422 | 6.887777 | 8.184004 | 5.169772 |
| 0.290255 | 10.31706 | 7.600717 | 9.801726 |
| 20.80412 | 17.5774  | 18.71152 | 20.76678 |
| 89.12609 | 43.46719 | 44.15984 | 46.10582 |
| 8.407217 | 21.9538  | 19.17682 | 21.2885  |
| 101.7174 | 37.97182 | 41.23356 | 37.54729 |
| 0.109537 | 0.815794 | 0.611246 | 0.573735 |
| 63.24044 | 37.36405 | 30.318   | 31.29378 |
| 17.66804 | 5.854693 | 5.377026 | 5.244802 |
| 1.814127 | 0.556369 | 0.613105 | 0.916191 |
| 17.90618 | 7.057519 | 7.207483 | 7.49456  |
| 16.44398 | 12.35285 | 11.85014 | 13.66391 |
| 1.492047 | 3.767729 | 3.77903  | 4.686216 |
| 270.1918 | 126.4752 | 131.5491 | 133.4562 |
| 36.61865 | 16.72014 | 17.27761 | 17.0124  |
| 72.60276 | 180.2698 | 167.0038 | 182.6866 |
| 22.45618 | 16.59391 | 14.49328 | 13.48197 |
| 0.424741 | 1.573517 | 1.658707 | 2.148916 |
| 32.12782 | 18.04043 | 18.28358 | 16.97735 |
| 4.049178 | 2.484835 | 2.22608  | 2.324499 |
| 8.786808 | 30.14624 | 28.68483 | 30.40276 |
| 9.72447  | 19.23054 | 21.14883 | 21.90584 |
| 2.847917 | 24.35817 | 22.94639 | 21.64228 |
| 63.88149 | 31.99156 | 29.57617 | 33.69262 |
| 23.08784 | 4.329748 | 4.993541 | 5.063209 |
| 15.71045 | 6.662186 | 5.720667 | 6.315989 |
| 0.811096 | 0.565338 | 0.735669 | 0.586372 |
| 46.90432 | 28.49815 | 29.3991  | 27.61517 |
| 15.88062 | 3.838985 | 4.759173 | 4.193638 |
| 9.352975 | 14.05905 | 16.90186 | 13.40169 |
| 27.26154 | 26.8535  | 29.96798 | 30.10775 |
| 1.076289 | 1.809667 | 1.81594  | 2.447028 |
| 1853.732 | 393.7534 | 385.2398 | 394.3476 |
| 260.8416 | 190.4954 | 196.6982 | 201.804  |
| 1.215465 | 0.220486 | 0.607276 | 0.248961 |
| 7.680142 | 2.077943 | 2.127806 | 2.587145 |
| 6.679271 | 18.55075 | 20.40476 | 20.32142 |
| 2.213162 | 1.493101 | 1.478078 | 0.75745  |
| 1.095088 | 4.009696 | 4.0602   | 3.962945 |

|          |          |          |          |
|----------|----------|----------|----------|
| 0.263313 | 1.92111  | 1.652093 | 1.73336  |
| 245.553  | 127.7663 | 123.06   | 129.2581 |
| 0.251986 | 0.419073 | 0.321823 | 0.376006 |
| 50.90429 | 20.40794 | 17.70368 | 20.29797 |
| 34.8751  | 36.98093 | 32.1702  | 37.4507  |
| 31.19853 | 7.317911 | 7.56134  | 8.871666 |
| 8.522816 | 37.17864 | 34.82687 | 36.3577  |
| 0.931229 | 2.276058 | 2.60411  | 2.346922 |
| 28.96174 | 3.363706 | 3.091507 | 2.559016 |
| 1.793187 | 2.139209 | 2.433613 | 2.534138 |
| 53.539   | 73.94024 | 74.59749 | 81.09798 |
| 19.62706 | 93.34739 | 86.84379 | 92.67297 |
| 61.46546 | 23.40863 | 22.13535 | 22.92598 |
| 0.462287 | 1.665713 | 0.745891 | 1.062173 |
| 11.27144 | 19.2888  | 19.67938 | 20.1898  |
| 0.96691  | 2.787781 | 2.060492 | 2.005127 |
| 12.72946 | 25.64551 | 23.93549 | 27.7543  |
| 1.993581 | 4.331945 | 5.077835 | 4.77521  |
| 0.474675 | 0.739592 | 0.895333 | 0.914242 |
| 141.2152 | 106.1365 | 99.27558 | 105.5285 |
| 1.31672  | 3.49973  | 3.041002 | 3.874316 |
| 0.960248 | 5.108067 | 5.183553 | 4.692386 |
| 41.6775  | 21.46624 | 19.14614 | 22.25926 |
| 0.788513 | 5.248226 | 4.159887 | 5.019698 |
| 2.209052 | 7.768601 | 7.427857 | 7.359404 |
| 17.88248 | 2.43004  | 1.524682 | 0.992823 |
| 417.5232 | 171.2893 | 173.1044 | 173.8755 |
| 7.507797 | 30.38191 | 28.30575 | 27.01358 |
| 1.056391 | 0.691569 | 0.394389 | 0.508028 |
| 0.244553 | 2.462769 | 2.423258 | 2.81187  |
| 3.453132 | 17.4322  | 16.18359 | 15.81657 |
| 0.225076 | 3.052705 | 2.682201 | 2.541749 |
| 3.515676 | 8.394472 | 7.220255 | 7.215171 |
| 5.910742 | 9.051272 | 6.531358 | 6.806502 |
| 7.99138  | 4.232568 | 4.097574 | 3.575769 |
| 1.373285 | 0.457321 | 0.418924 | 0.658139 |
| 27.83455 | 11.13018 | 10.09697 | 11.87912 |
| 0.867833 | 0.211248 | 0.265981 | 0.189433 |
| 4.011896 | 3.875826 | 3.44607  | 3.05752  |
| 2.195765 | 1.890028 | 2.120734 | 2.313032 |
| 1.38982  | 0.525849 | 0.53349  | 0.667481 |
| 6.039308 | 2.652985 | 2.860693 | 3.042951 |
| 15.55418 | 150.3093 | 126.9053 | 110.9656 |
| 44.31202 | 6.377088 | 6.911427 | 8.118591 |
| 13.49538 | 4.496007 | 4.312207 | 5.16193  |
| 0.469535 | 2.290681 | 1.695795 | 2.138946 |
| 10.91699 | 26.74701 | 25.47723 | 30.46893 |
| 0.061338 | 0.874002 | 1.138623 | 0.721526 |
| 3.947497 | 10.82561 | 11.07434 | 11.9219  |
| 3.105679 | 0.981934 | 0.886613 | 0.951302 |
| 4.481608 | 9.309511 | 7.96524  | 8.322645 |

|          |          |          |          |
|----------|----------|----------|----------|
| 1.510374 | 0.400872 | 0.987532 | 0.948049 |
| 12.25479 | 28.80519 | 26.31844 | 29.07285 |
| 11.21348 | 6.296699 | 5.137847 | 6.541039 |
| 102.5334 | 227.0649 | 226.7635 | 235.3977 |
| 3.656513 | 6.68092  | 10.36134 | 9.690655 |
| 2.176855 | 5.047144 | 5.889202 | 5.251676 |
| 5.055104 | 12.63451 | 11.48113 | 11.67959 |
| 11.66984 | 6.661292 | 7.317246 | 5.967391 |
| 60.05516 | 154.5757 | 152.8088 | 159.529  |
| 32.34557 | 15.96424 | 15.95369 | 15.25081 |
| 1.114116 | 7.701145 | 6.089931 | 5.237303 |
| 33.84481 | 13.02968 | 13.48286 | 13.54356 |
| 128.5036 | 36.31198 | 34.25132 | 37.45291 |
| 68.13715 | 32.53991 | 31.07761 | 35.76537 |
| 17.33595 | 7.864296 | 8.833764 | 9.654309 |
| 5.18131  | 3.022244 | 3.053619 | 2.167853 |
| 150.6374 | 29.84929 | 29.4188  | 30.05855 |
| 38.81978 | 11.35935 | 10.9232  | 10.92152 |
| 10.2261  | 5.444455 | 6.587324 | 7.367885 |
| 86.6657  | 4.888404 | 5.625787 | 4.434811 |
| 3.684046 | 10.01588 | 8.555392 | 8.794563 |
| 26.74321 | 13.53254 | 10.95102 | 12.3633  |
| 5.830762 | 0.991413 | 0.851518 | 1.066047 |
| 49.08496 | 16.99045 | 15.9092  | 17.7665  |
| 0.861641 | 1.875492 | 2.305474 | 2.70883  |
| 17.96814 | 35.44051 | 36.90965 | 37.60691 |
| 0.31411  | 1.248688 | 1.009622 | 1.157333 |
| 1.834139 | 22.79728 | 21.28602 | 25.24884 |
| 5.606535 | 3.018144 | 2.393421 | 3.50311  |
| 6.750742 | 2.579631 | 3.105145 | 3.950136 |
| 8.499202 | 1.937208 | 2.279944 | 3.056951 |
| 59.92299 | 29.56909 | 29.32806 | 28.42132 |
| 1.726332 | 0.58546  | 1.063147 | 0.715267 |
| 34.3986  | 12.77323 | 11.75398 | 12.63372 |
| 0.858124 | 0.806948 | 1.330428 | 0.870512 |
| 1.171664 | 3.905482 | 3.375983 | 3.336572 |
| 4.627521 | 0.699093 | 0.672059 | 0.738615 |
| 0        | 1.416664 | 2.014584 | 2.180741 |
| 54.46194 | 128.4745 | 127.5343 | 130.9229 |
| 2.733898 | 4.756671 | 6.128857 | 4.304554 |
| 2.223711 | 1.595428 | 1.79078  | 1.393172 |
| 6.27943  | 6.3495   | 6.117494 | 7.193822 |
| 5.013298 | 15.35835 | 16.92264 | 18.46458 |
| 0.430905 | 1.388715 | 1.465145 | 1.445076 |
| 22.81106 | 7.130117 | 7.076875 | 8.376559 |
| 1.235254 | 2.115695 | 3.601261 | 3.120524 |
| 59.36937 | 19.0323  | 15.33821 | 14.1412  |
| 1.8463   | 0.466938 | 0.623151 | 0.637673 |
| 0.298642 | 0.912697 | 1.352206 | 0.829668 |
| 0.433227 | 0.802691 | 0.600685 | 1.259829 |
| 1.642182 | 0.097369 | 0.312769 | 0.12855  |

|          |          |          |          |
|----------|----------|----------|----------|
| 6.343701 | 9.618429 | 8.821526 | 10.07796 |
| 103.5778 | 21.41051 | 20.69127 | 21.90668 |
| 1.25223  | 0        | 0.17513  | 0.260412 |
| 1.114552 | 0.200753 | 0.346383 | 0.856154 |
| 3.767687 | 13.23153 | 12.36043 | 13.68315 |
| 0.694949 | 2.313935 | 1.751113 | 2.300632 |
| 11.62696 | 4.352081 | 4.413077 | 5.428527 |
| 47.67265 | 22.93432 | 21.19987 | 25.22085 |
| 47.61614 | 17.83287 | 16.22429 | 19.04642 |
| 414.6023 | 52.44179 | 51.29203 | 56.68534 |
| 3.867817 | 8.477996 | 8.697984 | 8.56236  |
| 2.043324 | 6.651446 | 6.297482 | 8.472828 |
| 22.29585 | 45.83395 | 41.85241 | 45.62423 |
| 6.654643 | 0.280519 | 0.072205 | 0.169154 |
| 0.440282 | 2.357059 | 1.848105 | 3.19617  |
| 22.35251 | 11.87808 | 10.95439 | 12.69866 |
| 38.38758 | 92.32775 | 86.8347  | 96.78961 |
| 0.3924   | 1.313185 | 1.347142 | 1.233719 |
| 7.584772 | 23.44805 | 21.44088 | 26.97424 |
| 2.743127 | 6.838327 | 6.73237  | 6.941982 |
| 1.048406 | 0.992246 | 1.073066 | 1.88954  |
| 6.450341 | 21.44441 | 23.52722 | 24.10021 |
| 64.81473 | 45.62128 | 43.88322 | 44.70136 |
| 0        | 0.420384 | 0.447354 | 0.441033 |
| 322.9008 | 116.2137 | 112.6002 | 119.1784 |
| 2.669239 | 0.381754 | 0.807605 | 0.981855 |
| 1.033392 | 1.606664 | 1.897344 | 2.144067 |
| 7.231779 | 11.63154 | 13.40499 | 13.85872 |
| 2.124605 | 6.195866 | 5.846447 | 6.15785  |
| 2.104216 | 0        | 0        | 0        |
| 8.03648  | 3.040524 | 3.341457 | 2.664798 |
| 597.3962 | 263.6707 | 247.674  | 272.2138 |
| 0.115306 | 0.320498 | 0.290259 | 0.502921 |
| 0.290025 | 0.347526 | 0.148997 | 0.339694 |
| 3.568925 | 5.560633 | 6.070221 | 5.199471 |
| 0.658242 | 1.645075 | 1.721237 | 1.615989 |
| 2.328035 | 6.316189 | 4.83146  | 5.168485 |
| 1.500626 | 0.643557 | 1.326624 | 0.719725 |
| 14.34124 | 15.30729 | 13.56928 | 15.11959 |
| 5.222544 | 3.476648 | 3.394523 | 3.888213 |
| 2.619033 | 7.344255 | 5.274927 | 4.981921 |
| 41.65628 | 0.418688 | 0.060323 | 0.114296 |
| 3.774577 | 3.874901 | 3.264781 | 4.203944 |
| 3.505407 | 15.00999 | 17.58361 | 14.90814 |
| 4789.288 | 1168.298 | 1097.149 | 1151.204 |
| 0.545886 | 1.588582 | 0.967997 | 0.816918 |
| 28.6097  | 13.07892 | 10.71419 | 11.31166 |
| 0.230319 | 0.833007 | 0.940264 | 1.156137 |
| 0.281069 | 2.2075   | 2.395327 | 2.237594 |
| 2.29548  | 6.853306 | 6.138111 | 6.590271 |
| 3.468079 | 0.455496 | 0.367794 | 0.376501 |

|          |          |          |          |
|----------|----------|----------|----------|
| 1.087023 | 5.296858 | 5.969603 | 5.251157 |
| 32.89318 | 5.044243 | 4.628494 | 4.593484 |
| 1.079775 | 4.722454 | 3.965469 | 3.537309 |
| 1.359884 | 3.388331 | 4.204618 | 3.206579 |
| 3.41635  | 6.888265 | 8.16816  | 7.690822 |
| 9.797917 | 16.05841 | 15.74106 | 15.96918 |
| 44.48753 | 6.431163 | 5.696021 | 5.569514 |
| 20.55934 | 61.72702 | 60.72957 | 65.57918 |
| 2.554461 | 1.42493  | 1.327667 | 2.001281 |
| 4.591111 | 18.75472 | 19.43798 | 20.66475 |
| 0.407883 | 1.030781 | 1.030917 | 0.926102 |
| 181.3577 | 72.16582 | 67.86864 | 76.74209 |
| 1.318265 | 4.59578  | 3.221812 | 2.880394 |
| 1.034258 | 1.291388 | 0.585522 | 1.153951 |
| 9.53155  | 5.066212 | 4.886766 | 4.924452 |
| 21.28067 | 55.95483 | 55.92692 | 58.02635 |
| 37.0012  | 10.95564 | 11.51224 | 10.97088 |
| 0.895823 | 5.075942 | 3.802811 | 3.654999 |
| 33.50715 | 81.35011 | 82.64561 | 82.79625 |
| 3.491101 | 9.849879 | 10.28468 | 11.16717 |
| 22.88162 | 12.91728 | 12.23531 | 12.75777 |
| 2.564677 | 4.568998 | 5.311113 | 5.074646 |
| 40.47606 | 26.68036 | 25.76107 | 27.74069 |
| 4.840329 | 4.142322 | 5.245545 | 4.544528 |
| 1.433788 | 0.833126 | 1.262449 | 0.948899 |
| 25.16915 | 71.62672 | 68.11859 | 72.23163 |
| 3.044305 | 5.349178 | 5.684263 | 6.973327 |
| 3.254036 | 9.832766 | 7.336887 | 8.686294 |
| 0.217467 | 1.059879 | 0.535191 | 0.82769  |
| 24.26739 | 9.862759 | 9.412277 | 12.10843 |
| 1.159027 | 3.656919 | 2.71314  | 2.797679 |
| 7150.164 | 3367.146 | 3330.591 | 3493.176 |
| 7.261966 | 12.78791 | 13.62076 | 13.91887 |
| 1.102084 | 0.185994 | 0.411553 | 0.196576 |
| 7.634802 | 3.178754 | 2.553525 | 3.326149 |
| 30.51343 | 12.10673 | 11.2034  | 11.15142 |
| 35.0943  | 13.46732 | 14.50454 | 14.36575 |
| 12.82804 | 26.54802 | 25.32616 | 24.46322 |
| 19.65672 | 7.312638 | 4.909673 | 4.681486 |
| 9.241881 | 6.530618 | 6.306247 | 6.038611 |
| 3.233459 | 35.25624 | 32.62359 | 35.52786 |
| 0.800532 | 2.172392 | 2.280935 | 1.639261 |
| 9.354946 | 9.35897  | 10.69229 | 9.673477 |
| 0.771413 | 1.080514 | 1.340929 | 1.493183 |
| 7.548819 | 3.79847  | 3.785913 | 3.387274 |
| 4.523067 | 2.279302 | 1.550014 | 2.42355  |
| 37.02083 | 12.53083 | 13.61195 | 12.58905 |
| 13.73247 | 45.9086  | 47.83777 | 47.63012 |
| 26.78392 | 14.02203 | 13.31113 | 14.00619 |
| 2.56925  | 3.487509 | 3.055527 | 3.086026 |
| 0        | 0.193857 | 0.138982 | 0.331848 |



|          |          |          |          |
|----------|----------|----------|----------|
| 0.226068 | 1.148373 | 0.879887 | 0.783585 |
| 98.57435 | 44.7643  | 39.45542 | 41.58359 |
| 6.151464 | 7.860998 | 8.28476  | 8.904015 |
| 3.649452 | 1.670107 | 1.669705 | 2.176735 |
| 76.53645 | 32.65866 | 30.6886  | 33.6918  |
| 4.637104 | 4.830705 | 4.182357 | 4.7766   |
| 67.04425 | 27.38094 | 27.29242 | 28.44832 |
| 2.218247 | 10.1377  | 8.985224 | 9.68024  |
| 81.76452 | 161.8284 | 162.8468 | 172.3743 |
| 5.287313 | 2.744603 | 2.857918 | 2.920192 |
| 6.867866 | 4.739425 | 3.515158 | 4.176208 |
| 26.73474 | 14.33809 | 12.70737 | 13.22522 |
| 73.30023 | 36.75792 | 33.60807 | 34.6653  |
| 2.341266 | 12.62775 | 11.99168 | 11.554   |
| 0.585884 | 1.813085 | 1.386673 | 1.636011 |
| 0.983803 | 1.912577 | 1.952521 | 1.83019  |
| 70.6164  | 180.6021 | 176.9901 | 168.8247 |
| 5.92482  | 1.52161  | 1.981423 | 1.492486 |
| 25.07381 | 17.93607 | 19.31227 | 18.57831 |
| 48.09261 | 24.38431 | 23.59131 | 25.45928 |
| 2.663692 | 11.58493 | 9.452222 | 12.99908 |
| 0.67643  | 24.91043 | 21.39918 | 27.28109 |
| 3.748609 | 7.81551  | 8.947451 | 8.978561 |
| 1.351472 | 1.314207 | 1.234457 | 0.97922  |
| 34.97237 | 70.88093 | 71.15635 | 73.02667 |
| 0.258606 | 0.229668 | 0.311966 | 0.433301 |
| 30.36927 | 7.417751 | 9.491231 | 6.912587 |
| 6.48941  | 11.65243 | 11.89579 | 11.08472 |
| 2.879736 | 0.700269 | 0.783197 | 0.485695 |
| 0.784052 | 1.995468 | 2.073741 | 2.963166 |
| 10.06434 | 2.785494 | 2.241393 | 3.647015 |
| 70.37437 | 29.71653 | 30.87101 | 29.90038 |
| 86.79258 | 28.21669 | 28.10139 | 29.30665 |
| 59.99457 | 434.3145 | 430.1035 | 449.05   |
| 4.415059 | 9.472886 | 10.10152 | 9.973379 |
| 0.196032 | 1.506847 | 1.544843 | 1.735113 |
| 4.883948 | 13.27224 | 12.13973 | 12.44193 |
| 16.85301 | 41.39209 | 43.97694 | 45.64108 |
| 6.925288 | 3.276611 | 4.50455  | 3.263728 |
| 0.338011 | 0.463332 | 0.343106 | 0.436714 |
| 3.991519 | 1.69773  | 1.686318 | 1.808482 |
| 12.94407 | 8.040568 | 6.775412 | 6.600971 |
| 4.861359 | 32.35226 | 31.06276 | 35.08214 |
| 1.970214 | 7.134386 | 5.748605 | 7.026206 |
| 8.709671 | 7.330979 | 7.91022  | 8.146862 |
| 51.73198 | 37.14265 | 33.34559 | 35.90302 |
| 7.111419 | 3.254283 | 3.365755 | 3.654414 |
| 0.445953 | 0.603445 | 0.808767 | 0.478646 |
| 1.979944 | 0.660062 | 1.005367 | 0.769877 |
| 108.036  | 63.18396 | 64.14979 | 69.56024 |
| 2.683045 | 1.335665 | 2.095901 | 1.112417 |

|          |          |          |          |
|----------|----------|----------|----------|
| 8.870244 | 4.601151 | 4.038218 | 4.837724 |
| 90.68101 | 44.83565 | 45.63006 | 46.64806 |
| 5.604566 | 11.80936 | 11.28649 | 11.64372 |
| 70.72178 | 20.96548 | 19.63957 | 21.59818 |
| 84.05898 | 14.22726 | 14.526   | 15.32156 |
| 1.232453 | 3.425467 | 3.812087 | 3.24096  |
| 1.049522 | 1.10913  | 0.558565 | 1.06552  |
| 0.220941 | 0.29422  | 0.088684 | 0.061553 |
| 4.216247 | 4.245017 | 3.869608 | 5.319708 |
| 3.976174 | 12.69459 | 14.37442 | 13.51773 |
| 5.761088 | 13.6691  | 14.36096 | 14.10771 |
| 38.44654 | 18.5502  | 17.11917 | 17.27805 |
| 5.161437 | 12.57374 | 12.6894  | 12.70419 |
| 16.13204 | 3.600682 | 4.17884  | 4.115282 |
| 1.154238 | 0.17854  | 0.338454 | 0.31713  |
| 0.651192 | 2.900252 | 2.018404 | 2.181813 |
| 0.737592 | 0.231192 | 0.394624 | 0.363167 |
| 0.727819 | 6.013747 | 5.762164 | 5.775146 |
| 124.7024 | 39.01661 | 39.34767 | 42.12122 |
| 2.494391 | 3.464378 | 3.096371 | 3.545141 |
| 18.36987 | 5.560017 | 5.547819 | 5.802641 |
| 0.855223 | 1.073812 | 0.985726 | 0.972113 |
| 13.20637 | 3.708934 | 4.950475 | 4.705647 |
| 53.51434 | 135.7064 | 103.2124 | 123.5559 |
| 2.693776 | 1.642307 | 1.55945  | 1.229222 |
| 81.81057 | 37.44326 | 39.46463 | 40.20489 |
| 0.350842 | 2.950346 | 2.452228 | 3.299386 |
| 6.637948 | 3.770609 | 3.879895 | 2.879537 |
| 3.044655 | 11.73944 | 12.65843 | 13.77596 |
| 15.91373 | 23.2151  | 23.62916 | 24.8167  |
| 186.3724 | 0.613678 | 0.745933 | 0.866888 |
| 0.86748  | 6.251305 | 4.984023 | 5.489752 |
| 6.579443 | 0.39018  | 0.292479 | 0.738633 |
| 16.60237 | 8.167422 | 6.517757 | 8.86235  |
| 1133.087 | 302.7719 | 284.9964 | 314.5011 |
| 0.651843 | 0.758954 | 1.107751 | 1.135447 |
| 2.571773 | 4.590987 | 4.77018  | 4.502975 |
| 0.927559 | 2.354136 | 1.709716 | 2.330446 |
| 37.29234 | 14.49993 | 15.487   | 15.75477 |
| 0.962152 | 0.390998 | 0.534224 | 0.650696 |
| 0.652086 | 0.469608 | 0.358739 | 0.135147 |
| 8.341858 | 5.528106 | 5.222616 | 5.638302 |
| 0.660486 | 1.16304  | 1.488631 | 1.57143  |
| 1.004714 | 2.52802  | 3.412445 | 3.557214 |
| 6.82099  | 18.53518 | 18.48433 | 17.78719 |
| 119.3462 | 852.5703 | 853.6055 | 896.1521 |
| 0.785342 | 4.859483 | 4.099937 | 4.151675 |
| 0.133269 | 2.308592 | 1.676998 | 2.135628 |
| 3.836448 | 9.800292 | 9.33156  | 9.258366 |
| 3.892503 | 2.77585  | 2.440979 | 1.760372 |
| 39.23326 | 6.343777 | 7.03856  | 8.516309 |

|          |          |          |          |
|----------|----------|----------|----------|
| 6.222239 | 59.2678  | 60.16307 | 60.90952 |
| 4.683202 | 3.238544 | 4.403014 | 4.462472 |
| 1.124784 | 3.216822 | 3.73183  | 3.054729 |
| 3.381136 | 6.497386 | 5.860491 | 5.791113 |
| 0.425964 | 4.97193  | 5.116238 | 5.5581   |
| 21.73484 | 50.83178 | 51.23703 | 51.53314 |
| 13.96074 | 20.04509 | 19.46873 | 20.80269 |
| 0.713582 | 1.917204 | 1.138218 | 1.298656 |
| 12.22691 | 1.160581 | 1.197336 | 1.303752 |
| 21.04524 | 8.294448 | 8.436412 | 8.152469 |
| 2.296867 | 6.637563 | 5.069794 | 5.646363 |
| 0.414145 | 1.299645 | 1.555953 | 1.930796 |
| 60.27047 | 22.24687 | 23.15663 | 24.24586 |
| 0.064768 | 0.288702 | 0.316218 | 0.319289 |
| 17.95286 | 28.41286 | 28.62424 | 31.05434 |
| 0.688719 | 1.592126 | 1.045017 | 1.607088 |
| 19.34157 | 5.964811 | 5.700418 | 5.777329 |
| 0.29535  | 6.423416 | 6.387941 | 7.798417 |
| 29.68077 | 51.10618 | 58.53924 | 47.52078 |
| 1.021677 | 6.860065 | 6.937325 | 6.828515 |
| 0.326739 | 3.357287 | 2.984124 | 2.701401 |
| 13.63047 | 7.146699 | 7.131479 | 7.890129 |
| 3.440102 | 7.184874 | 9.456905 | 9.438527 |
| 42.62372 | 12.44739 | 14.19507 | 12.29068 |
| 30.56736 | 13.98841 | 13.68666 | 13.66379 |
| 46.50746 | 19.63724 | 19.32776 | 17.63286 |
| 18.22779 | 70.81627 | 63.65134 | 74.0645  |
| 0.557118 | 6.297021 | 5.143527 | 4.52137  |
| 97.92757 | 24.99248 | 24.36391 | 25.44226 |
| 1.040013 | 4.333108 | 3.605285 | 2.531435 |
| 8.337539 | 23.87327 | 23.57005 | 23.70987 |
| 0.041709 | 2.352521 | 1.911803 | 2.662526 |
| 2.859882 | 10.09343 | 8.383722 | 7.615776 |
| 651.4665 | 157.3705 | 160.7853 | 151.0398 |
| 2.767923 | 6.431365 | 6.872447 | 6.029266 |
| 29.53853 | 11.98982 | 12.36053 | 12.51813 |
| 1.246318 | 4.002081 | 5.170908 | 5.424372 |
| 175.3168 | 64.67484 | 67.12128 | 66.96089 |
| 14.59703 | 39.08857 | 37.91994 | 40.56011 |
| 0.149842 | 0.233095 | 0.208621 | 0.190247 |
| 20.99948 | 6.899039 | 6.771628 | 8.051906 |
| 3.467746 | 1.87481  | 1.289288 | 2.137278 |
| 8.165077 | 21.44324 | 20.84587 | 22.37702 |
| 0.473552 | 1.928837 | 1.202113 | 2.263013 |
| 0.866144 | 1.670249 | 2.330569 | 1.728649 |
| 0.916865 | 2.447476 | 2.55325  | 3.212613 |
| 11.56973 | 1.564759 | 1.491132 | 1.683775 |
| 0.337619 | 0.507836 | 0.188971 | 0.372833 |
| 2.8927   | 1.333756 | 0.392357 | 0.995949 |
| 5.197097 | 2.225293 | 2.025842 | 2.776383 |
| 1.137497 | 23.54862 | 25.42659 | 24.23394 |

|          |          |          |          |
|----------|----------|----------|----------|
| 0.720114 | 9.100624 | 8.81874  | 8.783624 |
| 2.876526 | 1.828066 | 1.279677 | 0.944949 |
| 37.78561 | 16.65294 | 18.41332 | 17.75638 |
| 212.4066 | 56.7946  | 57.44233 | 61.41183 |
| 16.06604 | 4.66765  | 4.865054 | 5.996242 |
| 0.74401  | 0.981245 | 0.167466 | 0.689748 |
| 19.55736 | 8.64886  | 8.868221 | 11.11668 |
| 1.815035 | 6.802863 | 7.121102 | 7.414292 |
| 12.5736  | 11.19785 | 12.61719 | 11.13802 |
| 13.19764 | 6.093306 | 6.963649 | 7.009514 |
| 6.871615 | 2.397004 | 2.254088 | 2.26198  |
| 177.3628 | 80.53572 | 80.01008 | 88.28986 |
| 24.4044  | 7.16662  | 5.644533 | 6.44868  |
| 1.077552 | 3.419344 | 3.233451 | 3.282588 |
| 0.660866 | 1.839988 | 1.324879 | 1.711372 |
| 5.053811 | 11.77969 | 13.03399 | 12.77436 |
| 1.419076 | 1.282975 | 1.236292 | 1.334644 |
| 17.47367 | 35.0817  | 40.37991 | 40.86192 |
| 19.45971 | 10.85807 | 11.1764  | 11.94786 |
| 11.21186 | 1.891411 | 2.854136 | 3.53058  |
| 7.534267 | 25.15551 | 24.66076 | 26.34506 |
| 27.7485  | 7.77617  | 9.353928 | 10.38721 |
| 7.498058 | 10.15364 | 11.73137 | 12.26476 |
| 0.124605 | 2.756142 | 3.147866 | 2.458452 |
| 0.045319 | 2.253873 | 2.020713 | 0.804961 |
| 8.038298 | 3.851443 | 2.69629  | 4.041423 |
| 73.03639 | 26.99419 | 28.63285 | 30.01289 |
| 2.502738 | 17.69994 | 15.12759 | 15.95494 |
| 164.4115 | 742.522  | 753.9791 | 766.9443 |
| 63.95387 | 149.9795 | 140.9445 | 152.4815 |
| 55.42975 | 1.666572 | 1.514115 | 2.332236 |
| 1.635413 | 0.436938 | 0.441849 | 1.032735 |
| 68.00485 | 35.43738 | 30.87808 | 34.21778 |
| 0.67665  | 1.99617  | 2.323422 | 1.42424  |
| 8.621105 | 1.644677 | 1.731197 | 1.903994 |
| 2.940647 | 1.523314 | 1.266372 | 1.570817 |
| 36.3236  | 7.069866 | 7.853409 | 7.678187 |
| 0.956282 | 0.951253 | 0.328485 | 0.822148 |
| 0.920208 | 0.449673 | 0.584125 | 0.275965 |
| 14.62705 | 4.311399 | 4.95598  | 4.004404 |
| 6.873771 | 14.86583 | 14.63283 | 16.03376 |
| 74.00286 | 34.04804 | 32.42742 | 32.97122 |
| 2.174227 | 5.203052 | 5.113667 | 6.323571 |
| 1.093177 | 0.123658 | 0.401649 | 0.523334 |
| 1.357462 | 2.417093 | 2.854534 | 2.373037 |
| 23.30712 | 51.32138 | 49.47826 | 55.8663  |
| 11.12572 | 12.12417 | 11.4991  | 11.6306  |
| 1.707727 | 0.091101 | 0.492934 | 0.816374 |
| 1.387911 | 3.417026 | 2.383389 | 4.333494 |
| 608.0772 | 305.9684 | 305.4651 | 316.6302 |
| 12.78674 | 48.31312 | 46.70348 | 51.5131  |

|          |          |          |          |
|----------|----------|----------|----------|
| 0.657163 | 3.749985 | 3.014043 | 4.412878 |
| 2.862573 | 14.74025 | 14.09604 | 15.76384 |
| 0.45427  | 0.332168 | 0.319399 | 0.837157 |
| 0.418481 | 1.523954 | 2.485704 | 1.987252 |
| 57.70287 | 7.083493 | 7.112402 | 7.963511 |
| 3.816625 | 12.17009 | 11.08887 | 11.43715 |
| 12.05104 | 8.599437 | 7.636565 | 8.659145 |
| 0.590645 | 3.333272 | 3.241814 | 3.087449 |
| 14.85275 | 8.040469 | 6.857178 | 6.157874 |
| 1.187595 | 28.63709 | 26.74635 | 32.85646 |
| 0.487618 | 0        | 0.012685 | 0        |
| 5.362331 | 3.046958 | 3.459543 | 3.290078 |
| 51.37253 | 134.3703 | 124.9047 | 140.6629 |
| 0.783471 | 25.67734 | 23.27883 | 26.13902 |
| 10.40458 | 4.382829 | 5.135609 | 4.20462  |
| 4.531823 | 17.5776  | 14.72951 | 16.57389 |
| 20.36762 | 3.939638 | 4.353258 | 3.823709 |
| 40.58305 | 18.19661 | 19.13906 | 18.59211 |
| 25.22571 | 8.310179 | 7.801784 | 9.340199 |
| 150.5685 | 20.76255 | 22.2629  | 22.11039 |
| 22.61221 | 11.21522 | 11.40644 | 12.45914 |
| 2394.337 | 899.2347 | 938.1737 | 938.0735 |
| 102.1478 | 30.34112 | 34.1327  | 38.54877 |
| 14.33325 | 6.178002 | 7.340209 | 6.693135 |
| 7.724836 | 39.53553 | 40.98213 | 40.2816  |
| 136.5261 | 51.9083  | 49.68879 | 56.30638 |
| 375.8409 | 836.8311 | 820.1319 | 867.2282 |
| 0        | 1.667215 | 1.88179  | 2.309451 |
| 68.17742 | 25.74693 | 22.82533 | 23.0011  |
| 0.433819 | 1.424807 | 1.448732 | 1.438849 |
| 7.433216 | 3.113543 | 4.118169 | 3.715181 |
| 15.10241 | 5.630628 | 5.644882 | 5.305111 |
| 13.21499 | 27.88162 | 28.33259 | 27.28533 |
| 0.256537 | 2.492094 | 2.928867 | 3.148839 |
| 26.74582 | 12.69157 | 12.06592 | 11.1778  |
| 51.89177 | 24.52955 | 27.06789 | 21.87017 |
| 28.27521 | 3.342507 | 3.112017 | 3.680228 |
| 0.193141 | 0.850935 | 0.954636 | 1.488819 |
| 0.033433 | 3.361903 | 3.45844  | 3.553373 |
| 4.586715 | 23.51551 | 21.40751 | 22.65858 |
| 18.71926 | 23.13148 | 24.96485 | 22.75394 |
| 43.88847 | 2.32465  | 2.79092  | 3.404385 |
| 1.283704 | 4.915173 | 5.113342 | 4.635179 |
| 21.18087 | 7.18002  | 7.993043 | 8.393215 |
| 64.89894 | 33.81591 | 30.76572 | 34.89919 |
| 22.10638 | 11.9631  | 10.97253 | 12.64507 |
| 31.50333 | 14.9877  | 14.30548 | 16.65829 |
| 28.63001 | 10.48564 | 9.536196 | 11.66389 |
| 7.257297 | 33.32312 | 28.92971 | 30.80908 |
| 19.46555 | 6.177533 | 4.848372 | 6.707741 |
| 0.967307 | 1.685405 | 1.287447 | 1.927766 |

|          |          |          |          |
|----------|----------|----------|----------|
| 0.178109 | 2.003827 | 3.087956 | 2.356811 |
| 5.827088 | 9.696879 | 7.897208 | 9.062207 |
| 1.006786 | 0.407111 | 0.401491 | 0.334472 |
| 7.341577 | 2.791137 | 3.609926 | 2.555863 |
| 16.3381  | 35.33274 | 34.52557 | 38.61789 |
| 6.074738 | 20.56264 | 19.54389 | 19.60147 |
| 49.31609 | 15.15473 | 15.08182 | 13.78242 |
| 3.682255 | 13.79019 | 13.43659 | 14.57338 |
| 12.79169 | 5.472169 | 5.04166  | 6.224735 |
| 24.44876 | 32.1842  | 33.70133 | 31.36619 |
| 2.725086 | 1.491564 | 1.194463 | 1.076727 |
| 232.5617 | 516.1898 | 538.7041 | 548.0092 |
| 0.130707 | 0.46648  | 0.668332 | 0.757867 |
| 17.55472 | 36.83882 | 33.01331 | 33.78233 |
| 0.841538 | 0.424161 | 0.681498 | 0.334658 |
| 2.380376 | 1.397025 | 1.418794 | 1.431189 |
| 7.06604  | 15.12554 | 14.51233 | 15.04904 |
| 10.63793 | 7.680434 | 6.664049 | 8.839716 |
| 0.163569 | 1.009321 | 1.405373 | 1.662651 |
| 1.996808 | 0.449548 | 0.814064 | 0.881457 |
| 4.142305 | 2.643255 | 2.88497  | 3.606612 |
| 347.6158 | 11.35581 | 13.20388 | 12.23173 |
| 1.772011 | 5.918999 | 6.415087 | 5.306465 |
| 1.838447 | 4.637048 | 4.306336 | 4.535804 |
| 0.360321 | 1.431288 | 1.339218 | 1.656539 |
| 1.109887 | 2.116538 | 2.465223 | 2.017891 |
| 3.070394 | 1.507666 | 1.471337 | 1.430268 |
| 42.25844 | 22.57966 | 20.89346 | 23.21137 |
| 0        | 0.937152 | 0.778128 | 1.14455  |
| 1.811876 | 0.62593  | 0.668123 | 0.864355 |
| 68.13619 | 35.48719 | 32.72462 | 32.0306  |
| 5.630995 | 7.413046 | 6.751094 | 7.364961 |
| 2611     | 772.9301 | 745.8169 | 808.9578 |
| 0.048232 | 1.084647 | 1.167421 | 0.879939 |
| 8.057693 | 24.10053 | 20.7499  | 23.36445 |
| 4.452714 | 1.9492   | 1.785272 | 1.899771 |
| 1527.594 | 392.0272 | 372.1752 | 401.8172 |
| 17.44801 | 31.17613 | 30.40378 | 33.07195 |
| 1.167312 | 1.337265 | 0.897564 | 0.851328 |
| 17.45368 | 1.672934 | 1.391653 | 1.502764 |
| 4.048162 | 7.19019  | 6.713922 | 8.886558 |
| 2.939736 | 1.896411 | 2.311959 | 2.206597 |
| 1.64772  | 2.121066 | 2.223465 | 2.177498 |
| 1.271617 | 4.561491 | 4.790071 | 5.701327 |
| 0.23076  | 0.081351 | 0        | 0.03707  |
| 2.715432 | 16.43309 | 19.44074 | 17.40322 |
| 2.384519 | 2.192533 | 1.564422 | 2.532243 |
| 13.12482 | 9.785506 | 10.48847 | 9.082448 |
| 9.102407 | 7.502249 | 8.236528 | 7.420344 |
| 1.02623  | 0.370973 | 0.762242 | 0.780521 |
| 3.057651 | 0.60056  | 0.584028 | 0.539997 |

|          |          |          |          |
|----------|----------|----------|----------|
| 6.180964 | 2.431673 | 1.788541 | 2.27988  |
| 596.147  | 855.8685 | 781.6208 | 812.1393 |
| 9.373451 | 24.75212 | 27.93004 | 27.06458 |
| 5.296604 | 2.062465 | 2.297996 | 2.177364 |
| 0.848824 | 3.462738 | 3.398172 | 2.996845 |
| 2.604665 | 4.902472 | 4.975338 | 5.099292 |
| 4.040831 | 33.71612 | 33.1244  | 31.8314  |
| 1.149669 | 3.613285 | 2.736522 | 3.246886 |
| 16.1851  | 17.14168 | 16.82195 | 19.72929 |
| 15.36035 | 8.214021 | 9.008584 | 8.33     |
| 0.133326 | 0.710697 | 0.528316 | 0.702046 |
| 15.12254 | 7.104512 | 5.222119 | 6.384025 |
| 1.397727 | 0.750287 | 1.094371 | 0.810033 |
| 0.428093 | 5.237342 | 5.236187 | 5.2939   |
| 9.361075 | 39.29738 | 38.48235 | 35.47853 |
| 0.930235 | 2.150476 | 2.848243 | 3.014171 |
| 9.683533 | 1.025885 | 1.279463 | 1.21694  |
| 2.523382 | 2.937037 | 1.78742  | 2.066147 |
| 2.017266 | 6.684554 | 10.99761 | 7.378089 |
| 81.35788 | 5.133273 | 4.359755 | 5.271547 |
| 12.58803 | 45.69651 | 47.5161  | 47.29466 |
| 0.063582 | 0.91608  | 0.971285 | 0.657603 |
| 0.235233 | 1.150233 | 1.471666 | 1.592467 |
| 0.042761 | 1.119531 | 0.724293 | 1.098674 |
| 184.7576 | 166.991  | 162.3948 | 177.4384 |
| 2.824412 | 19.01431 | 21.97131 | 22.58745 |
| 83.39862 | 228.9445 | 224.0251 | 254.3871 |
| 0.643293 | 0.300892 | 0.31363  | 0.24563  |
| 6.559841 | 1.361925 | 1.632775 | 1.395054 |
| 1.0224   | 1.838928 | 2.246212 | 1.95682  |
| 1.786976 | 4.731503 | 5.524244 | 5.031425 |
| 3.355769 | 1.205475 | 1.091264 | 1.294832 |
| 9.950233 | 0.080785 | 0.198682 | 0        |
| 2.633898 | 19.12103 | 21.18964 | 21.81579 |
| 3.24856  | 0.201375 | 0.187173 | 0.251475 |
| 7.784159 | 1.212742 | 1.697818 | 1.316339 |
| 1.203964 | 2.844841 | 3.645436 | 2.351607 |
| 91.62045 | 13.13133 | 14.39093 | 13.12329 |
| 19.31497 | 5.691278 | 5.451755 | 5.241924 |
| 2.366973 | 8.548638 | 7.395165 | 7.344453 |
| 103.585  | 39.30929 | 39.7216  | 38.66525 |
| 13.82376 | 8.019796 | 7.552466 | 6.121562 |
| 25.86811 | 5.171873 | 4.319841 | 4.605599 |
| 0.296853 | 2.399853 | 2.144186 | 2.421762 |
| 90.66222 | 31.9938  | 30.12102 | 33.74931 |
| 0.038296 | 0.454972 | 0.394109 | 0.197499 |
| 2.762994 | 1.001979 | 1.295281 | 0.708114 |
| 5.140767 | 4.725431 | 3.71425  | 4.728228 |
| 2.409634 | 17.53057 | 17.33495 | 19.22309 |
| 165.5163 | 49.62115 | 51.25013 | 50.26051 |
| 8.627023 | 11.11279 | 10.89593 | 12.235   |

|          |          |          |          |
|----------|----------|----------|----------|
| 5.908813 | 2.030353 | 2.085985 | 2.884108 |
| 0.123056 | 1.235199 | 1.349685 | 1.22938  |
| 2.400405 | 5.931365 | 4.462327 | 4.757501 |
| 1.564546 | 0.739928 | 0.40731  | 0.815909 |
| 72.46557 | 29.58404 | 30.76379 | 28.1406  |
| 1.773552 | 5.162831 | 4.821885 | 5.11425  |
| 0.059687 | 2.211958 | 1.794636 | 2.26271  |
| 3.706743 | 4.957102 | 5.974347 | 4.93541  |
| 0.957374 | 14.05825 | 12.21526 | 13.7429  |
| 28.76338 | 12.97079 | 12.07422 | 12.06628 |
| 17.48601 | 37.10108 | 34.73473 | 39.7843  |
| 1.27459  | 3.747424 | 3.248148 | 3.070878 |
| 0.230351 | 1.031666 | 1.09045  | 1.623742 |
| 80.40064 | 208.7001 | 215.7271 | 221.0854 |
| 1.061371 | 1.019641 | 0.791177 | 0.888884 |
| 2.18537  | 11.99489 | 10.38693 | 11.71433 |
| 0.155592 | 0.964435 | 2.212625 | 1.266073 |
| 1.281935 | 2.489345 | 2.784883 | 2.535638 |
| 27.06451 | 7.855274 | 7.018598 | 8.001018 |
| 1.98657  | 4.036372 | 5.054347 | 3.4056   |
| 21.58545 | 47.09211 | 46.23705 | 47.42951 |
| 6.441634 | 2.483791 | 2.149548 | 2.502378 |
| 1.364967 | 0.736596 | 1.432263 | 1.626915 |
| 27.47273 | 14.42278 | 12.83176 | 13.83174 |
| 0.480955 | 1.072445 | 0.653031 | 0.779047 |
| 3.334453 | 1.401042 | 1.846038 | 1.84392  |
| 4.099329 | 8.180084 | 10.65264 | 11.15185 |
| 6.323283 | 3.972612 | 4.217258 | 4.700863 |
| 0.617541 | 1.161666 | 1.77172  | 1.859245 |
| 0.162518 | 0.524651 | 0.644909 | 0.562875 |
| 0.781927 | 1.832328 | 2.534729 | 1.93363  |
| 1.632088 | 6.9512   | 6.713971 | 7.401559 |
| 90.68305 | 217.5651 | 209.0341 | 216.9067 |
| 1.593836 | 14.98173 | 12.3445  | 12.69399 |
| 4.204244 | 16.73963 | 15.27081 | 15.42941 |
| 2.062861 | 1.431897 | 1.372476 | 1.914277 |
| 0.087273 | 0.78196  | 0.722659 | 1.063667 |
| 0.021939 | 0.699833 | 0.805289 | 0.648006 |
| 7.980528 | 1.539925 | 1.695855 | 1.417603 |
| 36.54664 | 80.09377 | 82.15205 | 81.88304 |
| 31.45227 | 13.35338 | 14.79292 | 16.27863 |
| 29.95699 | 66.95482 | 60.53559 | 68.51168 |
| 25.20972 | 25.1368  | 25.35921 | 23.83424 |
| 5.059606 | 1.759523 | 1.03248  | 1.653006 |
| 5.838408 | 17.88952 | 15.89751 | 18.34689 |
| 0.379705 | 6.665014 | 5.373877 | 6.009062 |
| 0.161273 | 1.290456 | 2.165801 | 1.510186 |
| 202.9875 | 41.04168 | 41.10835 | 43.4787  |
| 200.4178 | 76.32148 | 86.10961 | 83.30186 |
| 3.529042 | 3.451629 | 3.778131 | 2.827424 |
| 7.67218  | 43.16424 | 40.45526 | 42.60059 |



|          |          |          |          |
|----------|----------|----------|----------|
| 3.697698 | 1.190697 | 1.447108 | 2.109108 |
| 12.51694 | 3.056092 | 3.067144 | 2.433833 |
| 5.866653 | 2.913984 | 2.554323 | 3.373413 |
| 2.203603 | 1.909653 | 1.802475 | 1.831328 |
| 0.369256 | 1.032786 | 0.360582 | 0.275043 |
| 19.05924 | 1.060604 | 1.119034 | 1.071764 |
| 19.06555 | 10.1183  | 10.55883 | 11.30289 |
| 83.25716 | 194.3397 | 197.0479 | 205.0861 |
| 0.819051 | 1.098637 | 0.571794 | 0.36031  |
| 0.488272 | 1.045159 | 1.151309 | 1.040541 |
| 0.418046 | 0.912079 | 0.5512   | 0.679956 |
| 0.328423 | 1.21352  | 0.696925 | 1.199029 |
| 4.142889 | 1.703534 | 1.416824 | 1.59697  |
| 7.920043 | 12.97261 | 12.60226 | 13.63807 |
| 2.607569 | 1.119203 | 0.700446 | 1.374147 |
| 3.627803 | 12.2206  | 14.71759 | 13.90434 |
| 2.004828 | 4.051    | 4.463049 | 4.178097 |
| 16.82554 | 7.551299 | 8.17695  | 7.717432 |
| 5.172149 | 2.444563 | 2.650133 | 2.343053 |
| 637.849  | 1584.042 | 1579.219 | 1624.514 |
| 2.71698  | 3.473949 | 3.4212   | 4.66601  |
| 1.464855 | 4.098486 | 4.400346 | 4.049935 |
| 2.11097  | 0.050667 | 0.240761 | 0.211181 |
| 2.203995 | 0.547511 | 0.678532 | 0.785294 |
| 1.111208 | 0.395376 | 0.224659 | 1.209032 |
| 0.51228  | 4.362784 | 4.430562 | 4.409586 |
| 0.13632  | 0.833489 | 0.655872 | 0.502492 |
| 30.89403 | 11.30399 | 9.881465 | 10.89694 |
| 0.262806 | 13.83948 | 11.36631 | 12.14264 |
| 0.26821  | 1.883911 | 1.383921 | 1.864984 |
| 64.31593 | 25.59769 | 24.25364 | 25.27386 |
| 0.77503  | 2.0135   | 2.263414 | 2.463153 |
| 2.894382 | 7.96585  | 7.871347 | 8.579036 |
| 1.702787 | 6.384808 | 5.140501 | 6.04361  |
| 1.565817 | 4.071799 | 5.119407 | 4.124758 |
| 4.029898 | 2.115891 | 1.350496 | 2.153511 |
| 5.757858 | 1.898677 | 1.846911 | 1.621204 |
| 1.681104 | 11.57494 | 11.67537 | 10.45274 |
| 33.26916 | 18.06273 | 18.26382 | 17.42651 |
| 1.598917 | 3.738244 | 4.540047 | 3.74778  |
| 190.9616 | 70.28249 | 59.22481 | 62.35466 |
| 0.12167  | 1.054162 | 1.166025 | 0.940913 |
| 2.491475 | 3.930798 | 6.061024 | 6.077299 |
| 12.77689 | 2.133152 | 1.605741 | 1.510556 |
| 29.09443 | 14.02411 | 13.11317 | 13.451   |
| 110.4563 | 282.6807 | 277.7487 | 291.6471 |
| 46.9598  | 22.44399 | 20.60196 | 21.39635 |
| 16.27753 | 901.6607 | 863.4858 | 903.4902 |
| 2.316341 | 2.3044   | 2.583025 | 4.402233 |
| 1.870216 | 12.92879 | 14.27902 | 14.13097 |
| 1.51688  | 8.886854 | 8.41453  | 8.506754 |

|          |          |          |          |
|----------|----------|----------|----------|
| 0.705835 | 1.574833 | 1.849727 | 2.136491 |
| 5.789155 | 2.43397  | 2.285135 | 2.411598 |
| 0.998016 | 1.099804 | 0.985596 | 0.948216 |
| 2.066887 | 1.086426 | 0.810024 | 0.829064 |
| 17.30243 | 43.26465 | 43.68837 | 46.85776 |
| 42.98406 | 55.12743 | 51.79596 | 57.6364  |
| 1.121313 | 1.626902 | 2.110783 | 2.287445 |
| 2.440344 | 1.129543 | 0.985089 | 1.279512 |
| 130.0513 | 315.0552 | 299.4187 | 316.0049 |
| 28.23899 | 14.37691 | 12.31576 | 12.81338 |
| 4.262569 | 1.789823 | 2.074113 | 2.321511 |
| 0.937285 | 0.712988 | 0.909985 | 0.752893 |
| 0.174912 | 1.118391 | 0.79735  | 1.258117 |
| 1.600715 | 1.494339 | 2.565177 | 1.584649 |
| 1.463717 | 0.329554 | 0.156483 | 0.191446 |
| 1.029078 | 0.94698  | 1.554604 | 1.479162 |
| 0.549016 | 0.835165 | 0.690575 | 0.855471 |
| 1.01847  | 1.329105 | 1.026283 | 1.221563 |
| 11.55143 | 4.82342  | 3.719463 | 3.843704 |
| 4.605862 | 16.94477 | 13.63745 | 15.02757 |
| 2.207208 | 17.84024 | 16.64503 | 16.38728 |
| 10.97992 | 0.378999 | 0.568506 | 0.707662 |
| 6.701389 | 3.773532 | 3.78394  | 3.15899  |
| 2.287017 | 16.81611 | 16.91175 | 18.35001 |
| 0.35574  | 1.798298 | 1.930909 | 1.512937 |
| 4.601591 | 14.022   | 13.28583 | 14.68863 |
| 20.40786 | 16.90485 | 15.37781 | 16.42425 |
| 0.793494 | 0.477739 | 0.637475 | 0.635348 |
| 12.29627 | 13.58044 | 13.72532 | 13.19118 |
| 9.055198 | 6.023859 | 6.048583 | 6.364547 |
| 6.618465 | 2.023762 | 2.007489 | 2.934955 |
| 704.9283 | 37.64494 | 36.34761 | 36.81447 |
| 15.13255 | 6.984098 | 7.436811 | 8.340471 |
| 15.19524 | 44.93662 | 38.68123 | 40.80166 |
| 199.2385 | 62.31321 | 64.75108 | 64.15468 |
| 0.251116 | 0.626319 | 0.617763 | 0.986071 |
| 1869.478 | 766.8515 | 763.9294 | 784.0906 |
| 13.2417  | 5.437157 | 6.07578  | 6.025638 |
| 53.99735 | 528.6457 | 552.0759 | 557.7591 |
| 17.41846 | 6.721834 | 5.543825 | 7.141063 |
| 0.517834 | 1.996197 | 2.47352  | 2.587698 |
| 22.90085 | 49.64278 | 55.15895 | 53.83755 |
| 0.967902 | 2.015095 | 2.631066 | 2.526701 |
| 22.44657 | 10.40443 | 11.46505 | 13.18877 |
| 5.181698 | 9.739341 | 10.5017  | 10.3119  |
| 0.671251 | 1.013998 | 1.465825 | 1.318973 |
| 4.59583  | 5.207252 | 5.210484 | 5.096601 |
| 2.385705 | 0.145297 | 0        | 0.044091 |
| 0.531654 | 1.561221 | 1.337835 | 1.404446 |
| 88.23345 | 30.60894 | 31.08156 | 31.54845 |
| 160.197  | 16.38609 | 17.38622 | 17.36325 |

|          |          |          |          |
|----------|----------|----------|----------|
| 1.644595 | 1.02525  | 1.117601 | 0.829371 |
| 9.986887 | 16.29559 | 16.31895 | 17.064   |
| 6.8137   | 2.930167 | 3.196192 | 3.32266  |
| 1062.206 | 486.3807 | 521.1746 | 526.5828 |
| 2.995553 | 7.454885 | 8.929101 | 8.909781 |
| 0.222713 | 1.338342 | 1.38767  | 1.361649 |
| 3.570029 | 9.465482 | 9.621255 | 10.66805 |
| 0.306807 | 1.487484 | 0.772703 | 1.064101 |
| 0.981733 | 5.169548 | 5.44571  | 6.141349 |
| 9.852321 | 40.24556 | 43.43164 | 41.54632 |
| 19.04123 | 54.92009 | 52.05003 | 55.39665 |
| 1.547765 | 8.340468 | 8.065467 | 9.191832 |
| 2.690043 | 41.5203  | 43.12422 | 45.69761 |
| 14.25579 | 5.502799 | 5.449905 | 5.389115 |
| 3.442483 | 10.35586 | 9.106951 | 8.569679 |
| 2.988578 | 23.56368 | 16.62993 | 19.19741 |
| 0        | 0.843351 | 0.414663 | 0.50697  |
| 5.791025 | 29.54391 | 27.0266  | 29.36626 |
| 29.08646 | 10.41799 | 10.3572  | 10.984   |
| 31.90837 | 62.13799 | 60.5534  | 63.20256 |
| 145.7125 | 305.6048 | 314.3201 | 317.206  |
| 59.71678 | 29.97366 | 28.07601 | 28.49953 |
| 0.890428 | 1.305433 | 1.295354 | 1.543937 |
| 1.511914 | 2.954475 | 2.26628  | 3.874313 |
| 3.330162 | 10.83028 | 10.34092 | 10.86044 |
| 4.612181 | 18.05518 | 16.44251 | 18.23356 |
| 7.963564 | 2.744974 | 2.823378 | 3.200397 |
| 4.391336 | 13.10896 | 14.16884 | 16.8504  |
| 4.143008 | 2.524437 | 1.495808 | 2.760278 |
| 12.8637  | 252.1606 | 240.0478 | 257.1562 |
| 6.210278 | 18.55792 | 17.68539 | 16.8346  |
| 104.8852 | 526.4858 | 489.5128 | 538.0028 |
| 3.097091 | 0.077047 | 0.054073 | 0.45612  |
| 9.873097 | 50.82148 | 50.66546 | 54.34509 |
| 12.59109 | 1.652391 | 1.21688  | 1.346151 |
| 0.456359 | 2.653399 | 2.787253 | 3.534187 |
| 20.96108 | 50.33544 | 49.36046 | 51.12602 |
| 8.966637 | 3.42674  | 3.89221  | 3.256323 |
| 0.359632 | 0.66295  | 1.363882 | 0.773805 |
| 7.614498 | 14.04314 | 16.35728 | 14.52966 |
| 15.22549 | 6.561578 | 6.556243 | 8.454082 |
| 3.11659  | 1.402398 | 0.500999 | 0.951127 |
| 0.18917  | 1.182697 | 1.232527 | 1.584952 |
| 10.34551 | 32.79311 | 32.5428  | 34.86568 |
| 1.190518 | 4.173512 | 3.993269 | 5.08934  |
| 37.04321 | 19.67428 | 21.24941 | 16.30017 |
| 9.211426 | 17.33986 | 14.89652 | 18.90883 |
| 2.746492 | 6.638829 | 6.085211 | 6.146586 |
| 11.44926 | 44.11994 | 43.61643 | 44.56579 |
| 7.050799 | 29.02456 | 25.99196 | 28.02284 |
| 4.207843 | 12.24283 | 14.35689 | 14.95942 |

|          |          |          |          |
|----------|----------|----------|----------|
| 0.173185 | 1.542607 | 1.820275 | 2.33357  |
| 0.555249 | 0.322329 | 0.138495 | 0.24244  |
| 0.199613 | 0.497136 | 0.465136 | 0.436433 |
| 0.653295 | 1.82011  | 2.113708 | 2.479584 |
| 6.074735 | 13.87938 | 15.29608 | 13.9527  |
| 17.56412 | 36.6425  | 35.96982 | 38.38341 |
| 7.871733 | 20.02823 | 19.64521 | 21.35539 |
| 1.438674 | 0.564325 | 0.445268 | 1.416576 |
| 19.73075 | 11.96866 | 10.38849 | 11.70146 |
| 75.6806  | 40.27248 | 12.67858 | 38.06338 |
| 55.24193 | 126.0726 | 124.1353 | 145.8401 |
| 2.073169 | 4.079749 | 4.441409 | 4.173369 |
| 5.474982 | 2.474887 | 2.798431 | 1.987144 |
| 5.622899 | 3.011315 | 2.511844 | 2.798587 |
| 24.26061 | 10.41876 | 9.511708 | 9.412716 |
| 5.326674 | 3.890817 | 3.773333 | 4.272186 |
| 11.78297 | 5.797533 | 5.577036 | 5.872848 |
| 27.71996 | 8.223279 | 7.635976 | 5.935536 |
| 77.90331 | 254.9737 | 246.5953 | 241.8941 |
| 0.350944 | 0.369521 | 0.196194 | 0.377202 |
| 7.741487 | 4.615191 | 4.45331  | 4.715459 |
| 87.56731 | 38.95152 | 29.35334 | 32.58901 |
| 7.453367 | 4.37499  | 3.763264 | 4.208403 |
| 14.38285 | 8.226666 | 6.834861 | 8.213117 |
| 2.888944 | 7.821766 | 7.084874 | 7.9026   |
| 0.766539 | 1.359387 | 0.864286 | 1.288924 |
| 0.547642 | 0.255479 | 0.18492  | 0.153082 |
| 84.21955 | 142.2561 | 133.3073 | 146.2086 |
| 82.09114 | 21.04251 | 18.97515 | 21.45667 |
| 3.38092  | 1.796138 | 1.449127 | 1.563577 |
| 1.627559 | 10.32388 | 11.63176 | 10.10529 |
| 18.90773 | 1.208088 | 1.678171 | 1.080224 |
| 2.317724 | 13.07334 | 10.81987 | 12.38712 |
| 1.061229 | 50.14333 | 47.73874 | 51.77867 |
| 5.528848 | 3.49004  | 2.718792 | 4.172589 |
| 2.589267 | 1.04707  | 1.277332 | 0.802602 |
| 123.2437 | 102.7678 | 98.42602 | 103.3195 |
| 44.46539 | 21.47941 | 19.98686 | 19.5728  |
| 32.03939 | 13.1476  | 10.40842 | 13.32797 |
| 4.901533 | 1.185181 | 1.175471 | 1.183246 |
| 78.91644 | 37.63437 | 33.88094 | 38.47091 |
| 3.269543 | 1.306358 | 1.435617 | 1.363028 |
| 1.031672 | 3.782173 | 4.266717 | 4.459134 |
| 242.1707 | 77.90425 | 78.12605 | 85.36326 |
| 7.500468 | 4.085574 | 3.852508 | 3.65797  |
| 0.714174 | 0.94052  | 1.496095 | 1.397027 |
| 67.6255  | 2.076056 | 1.892403 | 1.64307  |
| 3.425817 | 0.095658 | 0.238593 | 0.235082 |
| 248.3535 | 20.31607 | 20.58335 | 20.20461 |
| 5.98058  | 5.098134 | 3.792996 | 5.570961 |
| 1.371373 | 6.703177 | 8.245844 | 10.70405 |

|          |          |          |          |
|----------|----------|----------|----------|
| 3.005291 | 7.067779 | 8.092082 | 7.839549 |
| 6.977914 | 10.45116 | 15.18274 | 17.78515 |
| 0.322699 | 1.120135 | 0.852652 | 0.890022 |
| 0.340182 | 1.278714 | 1.828002 | 1.308862 |
| 1.087145 | 5.702035 | 4.912911 | 5.146122 |
| 1.859413 | 1.132902 | 1.228255 | 1.01461  |
| 6.104996 | 2.239571 | 2.896146 | 2.373443 |
| 87.71985 | 27.65487 | 26.57877 | 27.74555 |
| 35.46172 | 15.3019  | 16.1674  | 19.40388 |
| 2.962463 | 8.349929 | 8.43714  | 8.50031  |
| 14.25578 | 6.063924 | 7.140784 | 8.205774 |
| 278.1931 | 94.88535 | 99.22273 | 107.8007 |
| 0.984044 | 0.125447 | 0.15021  | 0.140785 |
| 3.377045 | 1.659837 | 1.896876 | 1.529197 |
| 14.39079 | 34.42654 | 32.0492  | 32.72737 |
| 84.16218 | 29.49241 | 24.14718 | 31.75018 |
| 45.00592 | 12.51058 | 13.64527 | 13.47838 |
| 0.665516 | 3.57786  | 4.947551 | 4.359645 |
| 2.299151 | 1.312598 | 0.870335 | 1.061839 |
| 3.690151 | 33.82965 | 32.44597 | 33.91509 |
| 1.998037 | 1.535298 | 1.754658 | 1.813847 |
| 10.57013 | 23.24    | 21.44121 | 23.95458 |
| 0.466923 | 1.233665 | 0.800447 | 0.948998 |
| 0.017867 | 4.618497 | 4.756741 | 4.915762 |
| 1.12485  | 5.339222 | 4.243031 | 4.181723 |
| 0.988791 | 0.827733 | 0.405656 | 0.44407  |
| 87.10855 | 29.43405 | 29.08443 | 31.88295 |
| 56.34885 | 308.2953 | 299.7349 | 310.3287 |
| 0.706103 | 1.054505 | 1.073578 | 1.620777 |
| 8.15205  | 7.843903 | 7.30227  | 8.982436 |
| 0.483597 | 1.452275 | 1.041913 | 1.400576 |
| 10.1863  | 4.934627 | 5.186799 | 5.003131 |
| 28.38402 | 13.54411 | 11.93507 | 13.93647 |
| 5.503978 | 8.729764 | 7.798928 | 6.932909 |
| 4.192604 | 1.445719 | 1.242603 | 1.579841 |
| 103.9954 | 37.55289 | 38.43206 | 36.90997 |
| 2.099805 | 5.24655  | 4.602787 | 5.564054 |
| 18.91782 | 51.23906 | 53.83754 | 51.1354  |
| 4.548263 | 1.676843 | 1.455518 | 1.851473 |
| 4.265699 | 8.925657 | 7.84213  | 8.641233 |
| 63.72256 | 16.28141 | 15.273   | 14.19503 |
| 0.101388 | 12.01716 | 13.84614 | 14.90954 |
| 5.576747 | 12.28582 | 13.18409 | 13.27385 |
| 0.291035 | 0.202195 | 0.103757 | 0.160491 |
| 8.223016 | 32.0181  | 37.37525 | 36.38909 |
| 29.30792 | 69.31915 | 70.47788 | 72.33939 |
| 6.854609 | 49.47471 | 47.97259 | 48.16695 |
| 5.373673 | 3.29611  | 4.041441 | 3.554221 |
| 0.782965 | 0.258638 | 0.201711 | 0.654343 |
| 5.003913 | 0        | 0.104782 | 0.169552 |
| 1.485507 | 0.755417 | 0.567871 | 0.521269 |

|          |          |          |          |
|----------|----------|----------|----------|
| 6.813873 | 1.847497 | 1.845424 | 1.755024 |
| 0.670724 | 1.352123 | 2.250016 | 1.407083 |
| 4.544798 | 10.07003 | 10.00942 | 8.941008 |
| 4.186625 | 1.955146 | 2.533674 | 2.017181 |
| 0.472562 | 1.015431 | 1.025233 | 1.296837 |
| 1.231601 | 0.883023 | 0.286457 | 0.652724 |
| 3.116103 | 7.343797 | 7.597702 | 7.820187 |
| 0.393502 | 11.82061 | 12.96768 | 13.59308 |
| 0.621606 | 2.031635 | 1.986311 | 2.161003 |
| 12.21469 | 4.485201 | 4.890753 | 5.554298 |
| 0.991571 | 5.457543 | 5.085367 | 8.322861 |
| 3.576054 | 3.753394 | 2.90491  | 3.463131 |
| 126.7479 | 306.3898 | 301.9388 | 313.4868 |
| 16.49344 | 4.457316 | 5.058597 | 4.075887 |
| 14.19069 | 6.690221 | 7.838    | 6.621189 |
| 39.78492 | 173.5555 | 176.3195 | 180.077  |
| 33.99137 | 0.243557 | 0.085906 | 0.130564 |
| 0.157552 | 0.302212 | 0.265783 | 0.548086 |
| 6.614719 | 14.69799 | 13.7021  | 15.647   |
| 0.700227 | 10.79332 | 7.49644  | 9.479995 |
| 6.683267 | 11.102   | 10.21224 | 10.70195 |
| 4.712155 | 12.21626 | 10.94933 | 13.16624 |
| 0.739175 | 3.452758 | 4.037407 | 4.17992  |
| 0.733311 | 0.913222 | 0.919471 | 1.183079 |
| 4.19998  | 1.60878  | 0.861393 | 1.608524 |
| 4.076733 | 51.19542 | 54.23026 | 54.69539 |
| 4.687042 | 2.113769 | 1.815507 | 1.608308 |
| 10.29135 | 1.07377  | 0.802984 | 1.120709 |
| 2.728902 | 3.457998 | 2.347664 | 2.609449 |
| 0.89331  | 2.00582  | 1.996968 | 1.68823  |
| 13.05539 | 38.46395 | 39.28634 | 37.28705 |
| 35.63868 | 37.29592 | 38.6008  | 42.41409 |
| 2.849471 | 10.61145 | 9.870324 | 10.54372 |
| 134.3496 | 96.77672 | 101.946  | 102.7767 |
| 128.871  | 62.59304 | 57.94107 | 61.2613  |
| 0.533042 | 21.61435 | 23.36176 | 24.47373 |
| 0.935901 | 1.151548 | 1.339848 | 1.280766 |
| 4.844012 | 3.55066  | 3.363688 | 3.95019  |
| 3.672918 | 0.923991 | 0.698101 | 0.61191  |
| 20.93237 | 48.34728 | 46.65176 | 48.24937 |
| 0.964041 | 2.154641 | 2.237786 | 1.836481 |
| 72.82183 | 24.7167  | 22.94651 | 20.39862 |
| 7.186078 | 2.631936 | 1.923729 | 1.388141 |
| 2.380652 | 3.628176 | 3.65643  | 5.037476 |
| 1.484137 | 3.410183 | 3.422966 | 5.224582 |
| 10.03236 | 5.112364 | 3.353919 | 3.830521 |
| 12.61042 | 9.178759 | 9.712997 | 9.3612   |
| 6.323487 | 39.25487 | 46.94931 | 47.44951 |
| 1.675913 | 6.208119 | 3.585594 | 4.878129 |
| 4.871894 | 14.23616 | 11.29066 | 10.76747 |
| 17.78847 | 45.01085 | 46.30377 | 46.69682 |

|          |          |          |          |
|----------|----------|----------|----------|
| 5.707961 | 2.684377 | 2.047419 | 2.535188 |
| 0.607601 | 0.671624 | 0.800974 | 0.539422 |
| 65.70767 | 26.87029 | 26.15381 | 30.53624 |
| 44.20512 | 2.64685  | 3.787072 | 2.948572 |
| 14.1196  | 35.87846 | 31.67805 | 35.8708  |
| 1.376671 | 2.993466 | 2.407706 | 3.640633 |
| 9.142398 | 4.531464 | 4.958402 | 5.062118 |
| 0.783182 | 0.29542  | 0.248864 | 0.321899 |
| 7.783247 | 23.14084 | 24.1977  | 25.39821 |
| 1.877961 | 5.802673 | 4.842938 | 5.224805 |
| 1.748054 | 5.045931 | 5.772321 | 5.983568 |
| 7.19869  | 2.719422 | 2.851014 | 3.491906 |
| 4.11399  | 1.044212 | 1.622504 | 0.400284 |
| 1.696959 | 4.082606 | 3.404324 | 3.813449 |
| 1.310557 | 3.47206  | 2.738178 | 3.55323  |
| 13.77641 | 31.83199 | 27.87123 | 31.09647 |
| 4.824659 | 20.87292 | 18.38346 | 21.22526 |
| 0.102674 | 9.037169 | 8.606911 | 9.487394 |
| 70.9848  | 30.3803  | 27.80298 | 32.30678 |
| 8.078595 | 135.4859 | 134.9273 | 139.0325 |
| 58.17064 | 38.40579 | 39.15608 | 39.41585 |
| 8.949132 | 3.313661 | 3.268752 | 3.095792 |
| 2.799594 | 9.041263 | 9.319233 | 9.872042 |
| 3.061507 | 21.67337 | 22.51267 | 23.7564  |
| 16.05243 | 9.943005 | 8.461172 | 7.180713 |
| 3.84844  | 22.25466 | 23.38229 | 21.74196 |
| 0.334318 | 1.115311 | 1.283104 | 1.132864 |
| 74.39117 | 175.0347 | 172.0738 | 172.0909 |
| 1.310443 | 2.252723 | 1.496683 | 2.105572 |
| 6.392844 | 1.135829 | 1.481967 | 1.063558 |
| 11.76146 | 4.510295 | 4.28454  | 5.498769 |
| 51.94424 | 28.34411 | 27.07562 | 28.55395 |
| 2.087147 | 1.792719 | 3.045008 | 2.600148 |
| 27.82425 | 83.02744 | 80.75708 | 80.56614 |
| 1.653258 | 2.426443 | 2.218413 | 2.270416 |
| 7.338392 | 0.990115 | 1.402521 | 1.945274 |
| 0        | 0.977297 | 0.567539 | 0.765721 |
| 19.82696 | 11.83373 | 11.25777 | 12.4246  |
| 6.040131 | 21.56375 | 21.78254 | 21.16923 |
| 9.057996 | 28.14063 | 25.11555 | 25.51474 |
| 27.15025 | 6.917036 | 6.638605 | 6.367765 |
| 1.852477 | 6.070314 | 6.062148 | 5.397071 |
| 16.45269 | 33.08152 | 32.93936 | 35.52456 |
| 2.170696 | 4.773096 | 5.454085 | 4.605912 |
| 2.955565 | 1.6604   | 0.70715  | 0.720076 |
| 0.891106 | 0.666404 | 0.513752 | 0.538668 |
| 6.687507 | 2.837779 | 2.851333 | 2.760788 |
| 0.311164 | 0.863301 | 0.421445 | 0.570439 |
| 7.862393 | 6.525039 | 4.929594 | 3.56605  |
| 4.646641 | 1.982204 | 1.838089 | 1.96475  |
| 10.40205 | 7.261671 | 6.319434 | 6.745472 |

|          |          |          |          |
|----------|----------|----------|----------|
| 4.149156 | 12.67671 | 14.47667 | 14.55497 |
| 2.420057 | 3.338063 | 3.450767 | 3.93344  |
| 2.369866 | 1.18087  | 0.363119 | 0.723599 |
| 2.726561 | 7.42313  | 7.30933  | 8.188074 |
| 62.83585 | 31.91556 | 31.75554 | 33.43955 |
| 0.120553 | 9.369541 | 11.37159 | 10.55306 |
| 4.126155 | 2.526773 | 2.019204 | 2.118694 |
| 34.68016 | 5.999892 | 6.299268 | 7.149337 |
| 4.068391 | 2.518902 | 1.759676 | 2.014783 |
| 3.30487  | 7.815832 | 6.95596  | 8.28035  |
| 65.58135 | 143.0421 | 146.8711 | 148.8503 |
| 252.1371 | 28.63576 | 26.50563 | 31.97424 |
| 1.366872 | 2.573722 | 2.346725 | 2.760456 |
| 20.13056 | 105.468  | 101.0007 | 102.8388 |
| 40.16638 | 20.87434 | 21.74386 | 22.65681 |
| 3.673784 | 9.294677 | 8.808584 | 8.758741 |
| 0.03969  | 0.571543 | 0.857489 | 0.952613 |
| 17.86661 | 8.62121  | 8.484896 | 8.286984 |
| 381.7508 | 1604.071 | 1499.64  | 1341.769 |
| 39.3499  | 11.02813 | 9.913685 | 12.12746 |
| 9.684159 | 3.992886 | 4.257061 | 3.88482  |
| 1.824637 | 3.827604 | 2.886313 | 3.366962 |
| 1692.285 | 536.6565 | 548.1581 | 565.719  |
| 0.457687 | 0.385438 | 0.26618  | 0.46909  |
| 25.27446 | 12.42762 | 10.66892 | 13.51846 |
| 5.758606 | 10.29213 | 9.226129 | 11.41837 |
| 4.754025 | 3.024255 | 3.019748 | 3.05661  |
| 2.675782 | 7.403636 | 5.700008 | 7.038775 |
| 2.211191 | 0.965044 | 0.975794 | 1.12604  |
| 33.20082 | 87.37015 | 89.74164 | 93.74696 |
| 465.467  | 157.9847 | 153.9143 | 148.9952 |
| 24.81699 | 8.111033 | 7.423746 | 7.555735 |
| 0.25528  | 0.623452 | 0.561975 | 0.715099 |
| 4.900908 | 12.07674 | 8.710662 | 11.27022 |
| 0.139885 | 0.512144 | 0.482447 | 0.487433 |
| 3.732444 | 0.647822 | 0.977221 | 1.476169 |
| 11.27412 | 1.454609 | 1.967591 | 1.549333 |
| 2.192076 | 0.636184 | 1.659223 | 1.118323 |
| 4.179978 | 2.591233 | 3.019511 | 3.152421 |
| 3.998795 | 1.270431 | 1.880587 | 1.676126 |
| 12.06861 | 6.817011 | 4.377417 | 5.041321 |
| 19.39918 | 28.90143 | 26.69845 | 28.48673 |
| 35.17586 | 12.95141 | 11.99112 | 12.87939 |
| 1.246639 | 0.459089 | 0.649304 | 1.354875 |
| 0.409431 | 0.709777 | 0.591167 | 0.924053 |
| 1768.181 | 551.8369 | 508.599  | 555.9885 |
| 28.8008  | 12.44023 | 11.23438 | 11.77066 |
| 17.78547 | 7.358703 | 8.303422 | 9.028093 |
| 8.24334  | 3.301386 | 2.848086 | 3.262097 |
| 10.4873  | 5.198243 | 4.761904 | 5.095259 |
| 0        | 3.422609 | 3.636012 | 3.310791 |



|          |          |          |          |
|----------|----------|----------|----------|
| 27.80134 | 63.04538 | 61.70012 | 67.1512  |
| 22.05593 | 64.37739 | 69.05554 | 65.28059 |
| 35.28094 | 12.89221 | 10.48197 | 14.16271 |
| 438.7889 | 153.2966 | 147.6034 | 151.4621 |
| 6.766705 | 17.1629  | 17.63765 | 18.79333 |
| 5.016978 | 1.911883 | 1.994529 | 2.4898   |
| 3.792236 | 10.74763 | 10.04428 | 11.2461  |
| 3.685381 | 2.999486 | 3.592139 | 3.592618 |
| 0.569963 | 0.625105 | 1.017107 | 0.304374 |
| 4.075756 | 8.452395 | 8.108271 | 7.821547 |
| 1.341581 | 0.440149 | 0.563271 | 0.40066  |
| 54.97732 | 12.2047  | 14.16009 | 14.40855 |
| 38.64177 | 7.735991 | 8.415974 | 9.039192 |
| 1.565785 | 2.479717 | 2.525647 | 2.928796 |
| 10.1938  | 4.221286 | 3.668553 | 3.685961 |
| 5.751293 | 14.0961  | 13.56885 | 15.12593 |
| 215.4008 | 73.4553  | 65.15055 | 72.32601 |
| 3.880449 | 1.727598 | 1.456142 | 1.55874  |
| 0.536616 | 0.757361 | 1.063401 | 1.101928 |
| 2.888823 | 6.470263 | 6.642988 | 6.568736 |
| 9.812048 | 3.978704 | 4.658308 | 5.031635 |
| 0        | 0.403389 | 0        | 0        |
| 3.883357 | 0.828103 | 1.100978 | 1.30696  |
| 10.18331 | 14.2657  | 15.48877 | 17.50921 |
| 953.7079 | 237.6249 | 226.6318 | 255.3244 |
| 5.584091 | 49.29718 | 46.75631 | 49.84192 |
| 16.32343 | 133.9812 | 139.9175 | 140.7868 |
| 35.27839 | 75.18623 | 70.36047 | 74.24181 |
| 3.757781 | 1.886752 | 1.659539 | 2.62587  |
| 0.623342 | 0.38985  | 0.575423 | 0.690352 |
| 1.708958 | 4.316302 | 4.917587 | 4.899353 |
| 7.202597 | 3.987883 | 4.240503 | 4.386835 |
| 17.64677 | 9.233901 | 12.03234 | 11.63218 |
| 0.580707 | 3.193109 | 2.569165 | 1.835601 |
| 2.369453 | 1.041656 | 1.25266  | 1.175745 |
| 6.310646 | 11.09372 | 11.04254 | 11.05445 |
| 6.52122  | 3.298509 | 3.613375 | 3.773329 |
| 132.6061 | 41.94196 | 39.41505 | 44.39201 |
| 6.901162 | 10.38071 | 10.90014 | 12.05803 |
| 3.388809 | 9.689961 | 8.587993 | 9.713795 |
| 50.19738 | 23.64737 | 24.73309 | 27.77796 |
| 75.89854 | 1.744267 | 2.790683 | 1.64575  |
| 13.50346 | 1.508919 | 1.558072 | 1.925568 |
| 39.8468  | 53.81878 | 53.14613 | 53.03518 |
| 36.12058 | 18.61884 | 19.81305 | 16.53791 |
| 4.183551 | 15.13013 | 15.44183 | 15.87459 |
| 0.294747 | 2.217119 | 1.450233 | 1.730093 |
| 2.198447 | 4.165431 | 4.624887 | 5.137446 |
| 18.72129 | 40.76643 | 49.66163 | 53.25069 |
| 8.304012 | 2.498791 | 2.669975 | 3.432518 |
| 31.0208  | 117.1597 | 111.7281 | 118.0502 |

|          |          |          |          |
|----------|----------|----------|----------|
| 53.74246 | 22.32267 | 21.68532 | 20.99592 |
| 30.41212 | 9.238326 | 7.448125 | 8.51428  |
| 1.90364  | 3.022896 | 3.172238 | 3.453909 |
| 1.332299 | 7.135302 | 7.049663 | 7.319713 |
| 0.433826 | 0.992115 | 1.265925 | 1.407965 |
| 15.10741 | 60.9669  | 61.25163 | 61.16735 |
| 58.47376 | 31.1028  | 30.3384  | 29.98288 |
| 2.845252 | 5.806101 | 5.880039 | 5.776263 |
| 1.31354  | 0.558862 | 0.490459 | 1.074199 |
| 18.46476 | 3.433574 | 4.705149 | 4.803229 |
| 18.95513 | 97.26412 | 100.8568 | 95.52425 |
| 17.71462 | 9.369177 | 10.59559 | 8.955897 |
| 31.19205 | 13.79738 | 16.75636 | 15.58189 |
| 2.788049 | 1.216553 | 1.135009 | 1.25097  |
| 1.609598 | 3.958496 | 4.235879 | 2.730567 |
| 5.539759 | 2.578954 | 2.137086 | 2.66642  |
| 1.060876 | 0.242586 | 0.096772 | 0.050495 |
| 6.030965 | 13.94636 | 11.83362 | 8.837129 |
| 7.99205  | 27.18178 | 24.83873 | 25.24125 |
| 197.063  | 53.05358 | 50.76596 | 56.93841 |
| 10.80105 | 22.35755 | 21.56809 | 24.92439 |
| 0.289871 | 0.733945 | 0.72413  | 0.503195 |
| 3.119632 | 6.19466  | 5.67418  | 7.146297 |
| 3.327504 | 0.891195 | 0.65618  | 0.484688 |
| 2.945765 | 1.583071 | 1.138214 | 1.237896 |
| 214.5509 | 66.34737 | 64.53129 | 68.96009 |
| 72.16551 | 30.73136 | 30.75937 | 32.59189 |
| 0.31128  | 3.807128 | 2.11584  | 3.316511 |
| 2.081071 | 23.59854 | 24.42823 | 22.48498 |
| 1.713293 | 4.139364 | 4.787342 | 4.719584 |
| 0.305906 | 0.931113 | 1.010729 | 0.815634 |
| 13.49514 | 54.90428 | 57.92603 | 58.19937 |
| 10.35013 | 3.130744 | 3.401007 | 3.378488 |
| 1.752937 | 0.556405 | 0.698874 | 0.679186 |
| 28.84345 | 66.34181 | 69.06116 | 66.68633 |
| 12.23217 | 32.96581 | 36.70662 | 33.64351 |
| 0.706495 | 1.871651 | 1.752988 | 1.533234 |
| 0.658728 | 0        | 0.172799 | 0.226498 |
| 1.357933 | 7.121518 | 5.538762 | 5.962703 |
| 1.59617  | 10.171   | 10.49061 | 10.02815 |
| 81.77536 | 98.08213 | 99.97725 | 100.4489 |
| 1.125291 | 2.161793 | 2.195111 | 1.834907 |
| 42.8207  | 15.36931 | 14.15057 | 16.09309 |
| 4.41562  | 12.24582 | 12.67837 | 13.80793 |
| 0.868045 | 4.072698 | 3.813112 | 3.56425  |
| 8.460859 | 3.538434 | 3.753942 | 4.08971  |
| 5.431291 | 2.9308   | 3.284567 | 3.62153  |
| 0        | 1.729826 | 2.274285 | 2.178633 |
| 2.997128 | 1.502039 | 1.213841 | 1.227897 |
| 0.802481 | 0.181452 | 0.311784 | 0.26544  |
| 17.0364  | 64.47988 | 63.4468  | 66.82974 |

|          |          |          |          |
|----------|----------|----------|----------|
| 0.665982 | 0.694537 | 1.282551 | 1.159212 |
| 19.0143  | 7.605374 | 8.593517 | 7.463903 |
| 0.701398 | 0.752923 | 0.501962 | 0.676411 |
| 1.855519 | 8.458059 | 8.019937 | 6.404789 |
| 51.87223 | 19.97888 | 22.55897 | 22.40435 |
| 4.013629 | 0.383018 | 0.74976  | 0.508945 |
| 15.18299 | 102.8446 | 98.72078 | 103.5735 |
| 721.476  | 112.6406 | 93.33634 | 98.81789 |
| 5.540988 | 13.34028 | 13.47006 | 11.54345 |
| 6.446519 | 17.66885 | 18.86712 | 19.07605 |
| 18.14376 | 7.58845  | 6.458853 | 7.558278 |
| 18.35536 | 0.992955 | 0.744642 | 0.938511 |
| 11.17202 | 4.212919 | 4.059342 | 4.899947 |
| 268.0087 | 92.65849 | 95.83122 | 101.9781 |
| 20.29904 | 47.75501 | 45.539   | 48.16416 |
| 10.56923 | 18.19577 | 21.30055 | 20.80126 |
| 8.147607 | 2.947372 | 3.041387 | 2.772443 |
| 9.486016 | 3.470054 | 4.942953 | 4.867051 |
| 10.0941  | 23.89695 | 21.4607  | 25.07411 |
| 2.271634 | 6.918598 | 7.138327 | 7.235571 |
| 0.741798 | 0.426057 | 0.550862 | 0.475061 |
| 1.387343 | 2.495824 | 2.846813 | 2.886132 |
| 224.5646 | 91.54677 | 85.18853 | 92.70544 |
| 7.315    | 3.334243 | 2.615208 | 3.513892 |
| 1.535312 | 0.849934 | 0.730974 | 1.187774 |
| 1.259264 | 3.196065 | 3.184783 | 4.043991 |
| 2.791668 | 9.369637 | 8.799622 | 10.20563 |
| 1.403718 | 4.477426 | 4.072803 | 2.791287 |
| 5.637622 | 13.9412  | 16.51259 | 15.49778 |
| 0        | 0        | 0        | 0        |
| 17.74975 | 61.22343 | 64.69025 | 63.59479 |
| 9.05228  | 2.240482 | 1.627056 | 2.629766 |
| 0.24069  | 0.559235 | 0.291092 | 0.35999  |
| 3.338615 | 1.662039 | 1.183089 | 1.506589 |
| 10.23805 | 5.349995 | 4.898538 | 4.372729 |
| 26.54143 | 12.53451 | 13.36595 | 14.39885 |
| 84.54473 | 33.49085 | 32.36146 | 34.2566  |
| 11.74353 | 1.64094  | 1.191443 | 1.945809 |
| 12.33697 | 17.41316 | 17.4851  | 19.98876 |
| 0.416425 | 1.411602 | 0.502966 | 1.299451 |
| 6.083695 | 43.9024  | 39.18181 | 40.83519 |
| 57.36699 | 20.4321  | 18.63367 | 22.9072  |
| 40.59433 | 59.83592 | 63.49397 | 64.99242 |
| 78.47187 | 929.1101 | 899.3543 | 937.1401 |
| 5.754036 | 8.035828 | 8.378036 | 8.249116 |
| 4120.394 | 852.2867 | 934.7281 | 953.6797 |
| 0.126871 | 0.660949 | 0.649958 | 0.741014 |
| 24.44144 | 7.363645 | 7.57224  | 8.403454 |
| 4.048599 | 2.209576 | 1.815704 | 2.454976 |
| 179.9055 | 67.31238 | 62.14103 | 64.2053  |
| 275.4377 | 123.1637 | 122.1627 | 126.9191 |

|          |          |          |          |
|----------|----------|----------|----------|
| 1.606231 | 0.283297 | 0.344318 | 0.668141 |
| 0.123593 | 0.907524 | 1.16282  | 0.836916 |
| 8.650421 | 24.16482 | 25.3524  | 22.62977 |
| 0.749203 | 2.747789 | 3.069037 | 3.04528  |
| 1.775323 | 9.827584 | 9.687475 | 9.948703 |
| 35.30605 | 14.30073 | 13.7406  | 12.61725 |
| 346.1159 | 801.7579 | 798.0733 | 828.2183 |
| 32.8793  | 14.72872 | 14.36192 | 14.60762 |
| 0.268537 | 1.165626 | 1.100255 | 1.718757 |
| 0.235724 | 1.256138 | 1.059548 | 1.206455 |
| 3.804492 | 10.22761 | 9.82734  | 12.88653 |
| 12.3223  | 5.880425 | 6.72714  | 7.368186 |
| 0.510756 | 1.702099 | 1.434746 | 1.666736 |
| 1.052403 | 4.100403 | 4.095662 | 4.332448 |
| 3.579252 | 10.2405  | 9.459799 | 11.24645 |
| 5.487514 | 2.12707  | 2.539448 | 2.453206 |
| 41.59242 | 27.68057 | 25.47309 | 25.63877 |
| 3.698079 | 40.90792 | 47.19882 | 47.50133 |
| 34.31637 | 15.73381 | 16.30235 | 15.60539 |
| 1.124198 | 3.59816  | 3.31406  | 3.436219 |
| 466.2129 | 246.6118 | 227.3796 | 254.9236 |
| 0.511877 | 2.32968  | 1.902608 | 1.92683  |
| 8.933138 | 17.88128 | 17.36084 | 19.40568 |
| 34.37472 | 4.479862 | 4.04037  | 4.352212 |
| 5.233829 | 5.789392 | 5.771972 | 7.078969 |
| 19.95487 | 0.354782 | 0.810184 | 0.507105 |
| 65.74035 | 4.269388 | 4.52204  | 5.104782 |
| 9.216042 | 4.980056 | 4.575838 | 4.00354  |
| 10.21783 | 3.688629 | 2.301006 | 3.880349 |
| 8.489029 | 3.15679  | 2.311248 | 3.52176  |
| 5.037528 | 28.70018 | 28.92927 | 29.43261 |
| 772.6756 | 1578.606 | 1592.771 | 1661.823 |
| 0.203426 | 3.496962 | 2.859352 | 3.590141 |
| 8.281102 | 2.218474 | 2.376189 | 2.203963 |
| 1.262426 | 0.331219 | 0.209401 | 0.27101  |
| 0.500766 | 2.41616  | 2.36346  | 2.46753  |
| 3.424123 | 14.10731 | 14.14839 | 13.11273 |
| 8.075679 | 4.616428 | 4.044593 | 3.291706 |
| 0.372925 | 0.622336 | 0.625192 | 0.53885  |
| 0        | 0        | 0        | 0        |
| 1.611614 | 9.267379 | 9.571465 | 10.38052 |
| 2.031197 | 16.97584 | 16.29584 | 16.82452 |
| 17.50238 | 8.791661 | 6.799988 | 9.33956  |
| 0.497598 | 1.416682 | 2.521858 | 1.939198 |
| 2.332647 | 0.40621  | 0.545961 | 0.803413 |
| 1.516181 | 3.192823 | 2.506377 | 3.626215 |
| 3.417629 | 20.18609 | 17.79983 | 19.58391 |
| 2.925316 | 7.341985 | 6.555127 | 8.136511 |
| 0.507164 | 1.121642 | 0.899587 | 1.044773 |
| 4.523691 | 2.265584 | 1.84753  | 2.38075  |
| 64.60926 | 30.43752 | 31.62646 | 34.93762 |

|          |          |          |          |
|----------|----------|----------|----------|
| 0.807162 | 0.508593 | 0.358118 | 0.377346 |
| 0.630787 | 2.992704 | 3.117124 | 3.292211 |
| 1084.317 | 1331.244 | 9299.911 | 556.247  |
| 0.831476 | 0.474215 | 0.634213 | 0.624513 |
| 0.48127  | 1.306972 | 1.071639 | 1.235591 |
| 1.678283 | 0        | 0        | 0.028865 |
| 25.33781 | 30.08364 | 28.04937 | 33.07888 |
| 38.36722 | 6.970556 | 7.627173 | 7.559897 |
| 28.48628 | 144.3284 | 148.3104 | 151.4351 |
| 130.4325 | 76.41322 | 68.70879 | 70.75286 |
| 8.208584 | 5.395352 | 3.216345 | 3.809419 |
| 13.14658 | 3.083817 | 3.638903 | 3.431825 |
| 0.791768 | 23.20001 | 23.6261  | 23.23449 |
| 0.340659 | 1.359718 | 0.984041 | 1.552447 |
| 8.005009 | 17.83413 | 19.20046 | 16.20487 |
| 1.348248 | 1.674958 | 1.872173 | 2.348905 |
| 2.123187 | 5.252553 | 4.597783 | 4.700758 |
| 1.85004  | 6.709748 | 6.847662 | 6.013528 |
| 42.48814 | 10.56258 | 9.622034 | 10.39115 |
| 2.779703 | 1.498071 | 1.360176 | 0.90387  |
| 0.174592 | 0.756884 | 0.692588 | 0.560422 |
| 0.136928 | 0.385082 | 0.16256  | 0.485254 |
| 418.1728 | 179.1517 | 181.0006 | 190.6269 |
| 0.611446 | 0.732207 | 0.372657 | 0.652006 |
| 8.56517  | 20.0788  | 19.90492 | 19.56954 |
| 1.718798 | 2.487113 | 2.732821 | 2.4634   |
| 26.93954 | 4.556142 | 4.116638 | 4.313313 |
| 0.814986 | 3.527176 | 2.56523  | 3.866945 |
| 22.60365 | 53.08464 | 50.2596  | 52.6723  |
| 1.264956 | 4.993834 | 4.761905 | 6.094645 |
| 32.80183 | 24.21748 | 23.00351 | 25.4264  |
| 0.702777 | 0.17182  | 0.293129 | 0.232714 |
| 0.54244  | 3.634925 | 3.049896 | 3.991134 |
| 0.818648 | 3.679673 | 2.723356 | 4.301617 |
| 90.2803  | 44.28993 | 43.54474 | 45.04972 |
| 37.01619 | 3.211723 | 4.442566 | 4.289773 |
| 0.362529 | 1.699244 | 1.134192 | 1.810894 |
| 32.81967 | 6.473626 | 6.929993 | 5.677166 |
| 12.67373 | 18.41321 | 16.78844 | 16.57624 |
| 0.593827 | 0.924502 | 0.669057 | 1.002133 |
| 5.334406 | 34.27717 | 29.86078 | 33.01953 |
| 1.301746 | 6.556958 | 7.898451 | 8.380169 |
| 1.842253 | 0.888002 | 1.353408 | 0.794237 |
| 39.24217 | 106.8124 | 99.22702 | 109.663  |
| 7.893598 | 38.65219 | 23.22779 | 38.47109 |
| 767.0073 | 2006.178 | 1806.658 | 1957.753 |
| 65.92796 | 30.58498 | 27.31025 | 29.84982 |
| 11.34012 | 5.470867 | 6.071744 | 5.307851 |
| 0.634019 | 0.271833 | 0.310213 | 0.374263 |
| 5.94767  | 5.471336 | 5.42298  | 4.68548  |
| 466.3155 | 102.0499 | 110.9464 | 115.8706 |

|          |          |          |          |
|----------|----------|----------|----------|
| 8.952772 | 10.90863 | 11.74132 | 9.916089 |
| 52.23765 | 21.29666 | 20.49799 | 19.91436 |
| 6.28351  | 2.265661 | 2.629687 | 2.92871  |
| 7.60841  | 4.768673 | 4.298393 | 5.502215 |
| 2.522904 | 9.722862 | 7.182031 | 5.981599 |
