# Supplementary material for: Ectopic Expression of AeNAC83, a NAC Transcription Factor from Abelmoschus esculentus, Inhibits Growth and Confers Tolerance to Salt Stress in Arabidopsis
Source: MDPI journal article supplement (doi:10.3390/ijms231710182), 2022-09-05
Supplement: s1 [file s1]

**Table S3.** Primers for quantitative real-time (qRT) PCR.

| Gene           | Gene accession                 | Primers sequence (from 5' to 3')                        |
|----------------|--------------------------------|---------------------------------------------------------|
| <i>AeActin</i> | i2_HQ_OkraNGS_c92341/f5p2/2106 | F: TTGTATTGCTCGACGTACCAA<br>R: TTATACCCATCAACACGTCCC    |
| <i>AeNAC83</i> | i2_LQ_OkraNGS_c8741/f1p2/2376  | F: AAGAACCAAACTCATAGCCAT<br>R: CTGCTTTCTTCGGAGTCGTC     |
| <i>AtActin</i> | AT3G18780                      | F: GTCGTACAACCGGTATTGTGCT<br>R: TGTCTCTTACAATTTCCCGCTCT |
| <i>AUX1</i>    | AT5G01240                      | F: AGTGACCACTGTGAAGGTAAC<br>R: CCTGCCTTCTCTATGATTCCCA   |
| <i>ARF</i>     | AT2G46530                      | F: GCCAAACAAGCTTAGAGCCAC<br>R: TGTTCATGTGACCTTGAGGG     |
| <i>SnRK2</i>   | AT2G23030                      | F: CAAACGAGCTTGTGGCTGTC<br>R: CGACCCACGCTAGATATCCG      |
| <i>SnRK2</i>   | AT4G40010                      | F: GCCGGTAGATTGAGCGAAGA<br>R: TTTCCGGGACAAGACTTCCG      |
| <i>ABF</i>     | AT1G49720                      | F: AAGGGCTCGAAAACAGGCTT<br>R: TGACTTCACCTTCTTACCACGG    |
| <i>JAZ</i>     | AT1G19180                      | F: CTCGTGAAGGAGGGCAAACCT<br>R: TTGGGGTTGGTTGGTTTGGT     |
| <i>JAZ</i>     | AT5G13220                      | F: GCGCTACCAGAAAAGACGA<br>R: TGCTGCTTCATTAGCGACCT       |
| <i>MYC2</i>    | AT2G28160                      | F: GTCAAATCCGGTTCTGCACT<br>R: AGCCAATGAACCAAAACGTGA     |
| <i>NPR1</i>    | AT4G26120                      | F: AAACGACCTTACGGGAACGG<br>R: TGTTTGAAACGCACTTGAGC      |
| <i>TGA</i>     | AT1G08320                      | F: ACTACAAATATATACAGCCCACA<br>R: TATGGTTCGCCATCTCTACTCA |
| <i>PR1</i>     | AT2G14610                      | F: ACGGGGAAAACCTTAGCCTGG<br>R: TTGGCACATCCGAGTCTCAC     |
| <i>PR1</i>     | AT4G33720                      | F: GGAGAGGTTGGGATGTGCAA<br>R: GACCAGGACCACACAAACCA      |
