# Supplementary figures and images for: Ectopic Expression of AeNAC83, a NAC Transcription Factor from Abelmoschus esculentus, Inhibits Growth and Confers Tolerance to Salt Stress in Arabidopsis
Source: MDPI journal article supplement (doi:10.3390/ijms231710182), 2022-09-05

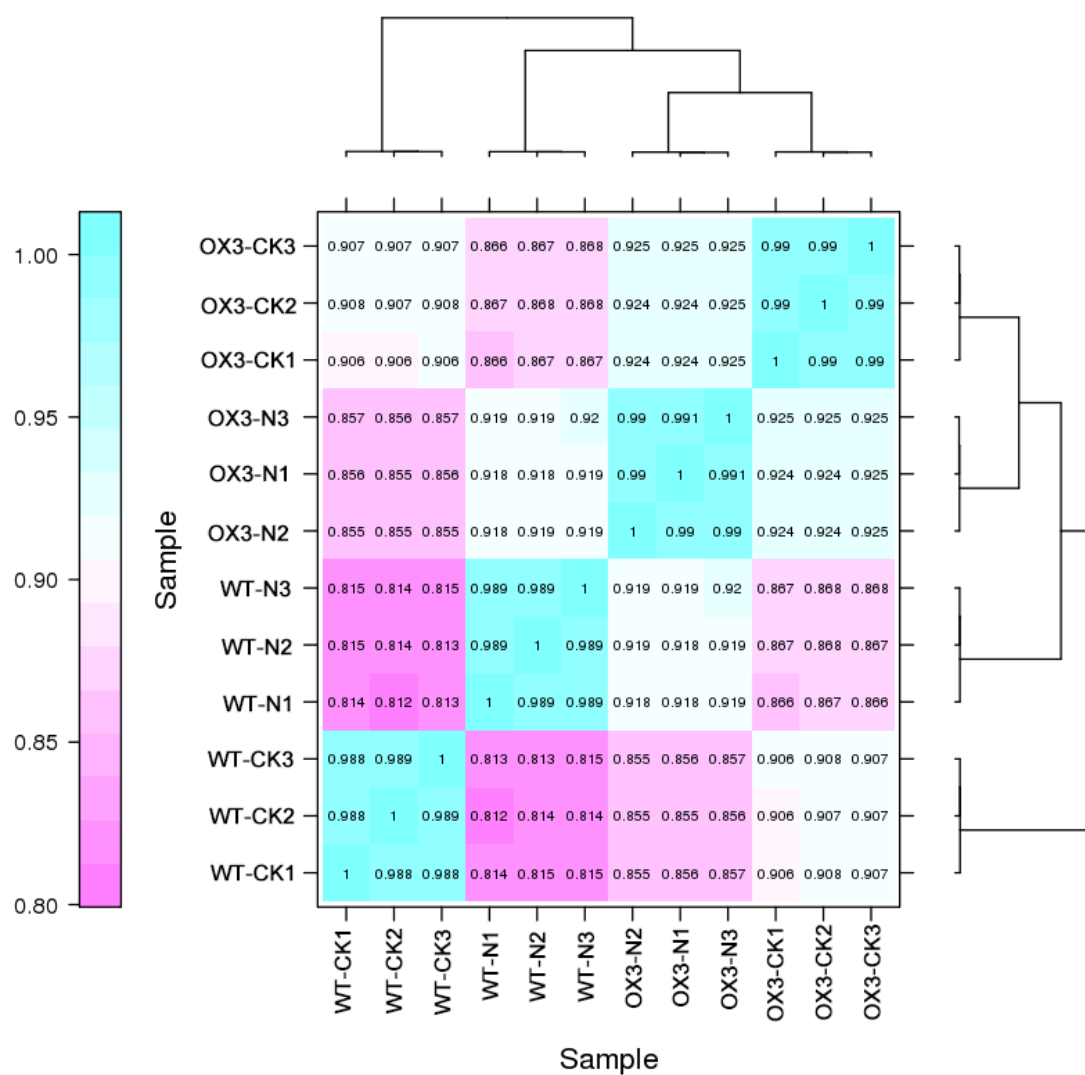

**Figure S1.** Heatmap of Pearson's correlation between samples.

Supplement: s1 [file s1]

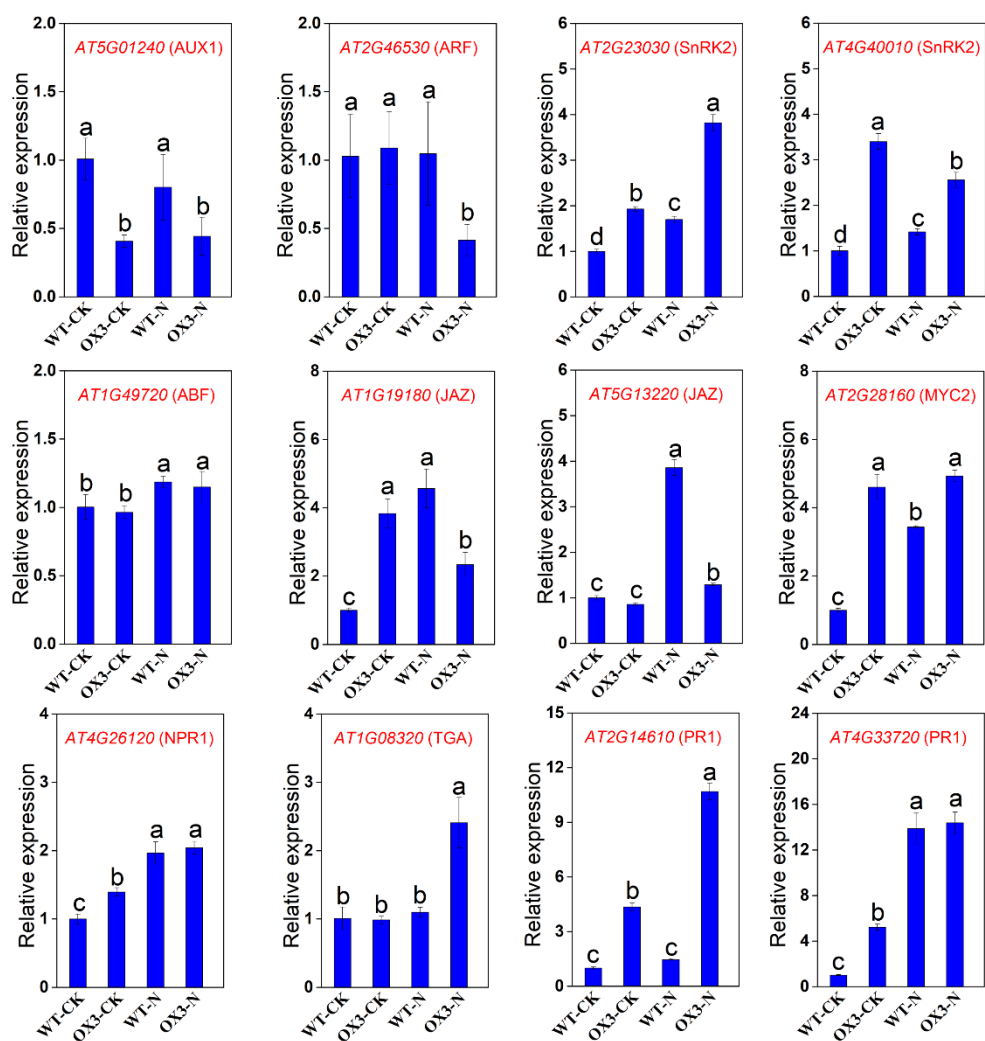

**Figure S3.** Validation of expression pattern of several hormone-related genes by qRT-PCR.

Supplement: s1 [file s1]
